# Supplementary material for: Spinal lumbar dI2 interneurons contribute to stability of bipedal stepping
Source: eLife. 2021 Aug 16;10:e62001. doi: 10.7554/eLife.62001 (PMC8448531; doi:10.7554/eLife.62001)
Supplement: Figure 1—figure supplement 2—source data 1. — Expression of TFs in dI2 neurons (Figure 1—figure supplement 2E). [file elife-62001-fig1-figsupp2-data1.xlsx]

## Sheet: Sheet1
E5														E6																									E14
embryo	#dI2	Lhx1	Pax2	Lhx1+Pax2		premig	Lhx1	Lhx1+Pax2	postmig	Lhx1	Lhx1+Pax2			embryo	#dI2	Brn3a	FoxP2	Brn3a+FoxP2			embryo	#dI2	lim1	Pax2	Lim1+Pax2			embryo	#dI2	FoxP1		embryo	#dI2	FoxP4	FoxP2	FoxP4+FoxP2			embryo	#dI2	lim1	Pax2	Lim1+Pax2			embryo	# dI2	Brn3a
1	6	2		1		0	0	0	2	1	1			1	5	1					1	3			1			1	5	1		1	4						1	3	2					1	3	2
1	5	4				0	0	0	4	2	0			1	5	1	1	1			1	3	3					1	9			1	2						1	10	1		2			1	1	0
1	10	10				1	1	0	7	1	0			1	5	1					1	3			2			1	9	2		1	3	1					1	9	2		1			1	1	0
1	5	4		1		3	3	0	6	2	0			1	5	1	1				1	2	2					1	10	2		1	5						1	11						1	1	1
1	11	9		1		0	0	0	1	1	0			1	1													1	7	3		1	1						1	12			3			1	1	0
1	1	1				3	2	0	4	1	0			1	5	1	1				Sum	11	5	0	3			1	7			1	6	1		1			1	7	1		2			1	1	0
1	9	7				4	4	0	4	2	0			1	15	2	1											1	9	1		1	4			1			1	3						1	1	0
1	7	7				1	1	0	6	3	2																	1	10	2		1	2						1	8	5					1	3	0
1	7	6		1		1	0	0	2	2	0			Sum	41	7	4	1										1	14	1									1	8	3		3			1	2	0
1	3	2				0	0	0	2	1	1																	1	9	2		Sum	27	2	0	2			1	14	2					1	1	1
1	2	1		1																								1	10	2																1	2	0
Sum	66	53		5		13	11	0	38	16	4																												Sum	85	16	0	11			1	2	0
																												Sum	99	16																1	1	0
2	8	6		2		3	3	0	5	2	2																																			1	1	0
2	10	8		1		3	3	0	7	4	1																																			1	1	0
2	12	9		1		2	2	0	10	5	1			2	15	4	1				2	9	4					2	7			2	17		1	1			2	1						1	1	0
2	7	7				4	4	0	2	2	0			2	4	1					2	9	5					2	7	1		2	20	1		5			2	1	1					1	1	0
2	3	1		1		0	0	0	4	0	0			2	11	4	1	1			2	10	6					2	2			2	8			1			2	4	1					1	3	0
2	8	8				1	1	0	7	6	0			2	2		1				2	14	11					2	2			2	9			1			2	8	1		2			1	1	0
2	4	3				2	2	0	2	1	1			2	8						2	5	2		2							2	10						2	12	4		1			1	1	0
2	1	1				1	1	0	0	0	0			2	7	1					2	4	2					Sum	18	1		2	7						2	5	2		1			1	1	1
Sum	53	43		5		16	16	0	37	20	5			2	8	4	1				2	5	3									2	5		1				2	3	1					1	1	0
														2	1	1					2	2										2	6	1		1			2	3						1	1	0
														2	2		1	1			2	17	9		3														2	4	1
embryo	#dI2	Brn3a					premig	Brn3a	postmig	Brn3a				2	4						2	15	10		4														2	3	2					Sum	32	5
1	9	6					3	2	6	3				2	3	2					2	15	14									Sum	82	2	2	9
1	5	3					1	0	5	2				2	3		2				2	14	12																Sum	44	13	0	4
1	3	2					0	0	2	0				2	7	1	2				2	17	14		1																					2	1	1
1	6	5					0	0	5	3				2	8			1																												2	2	1
1	2	1					1	1	2	0											Sum	136	92	0	10																					2	3	1
1	8	6					2	2	7	4				Sum	83	18	9	3																					brn3a and foxp1 partition				FoxP2 and FoxP4			2	2	0
1	5	3					1	0	6	1																													1				1			2	1	0
1	6	5					2	1	6	1																													1				2			2	2	0
1	5	4					2	2	3	2																													2				2			2	1	0
1	6	3					0	0	5	1																													1				1			2	2	0
1	2	2					1	1	1	1																													1				2			2	4	1
1	5	4					2	2	3	1																													0				1			2	4	0
1	2	2					1	1	1	1																													2				1			2	1	1
Sum	64	46					16	12	52	20																													2				2			2	5	1
																																							2				1			2	3	0
																																							2				2			2	5	0
																																							2				2			2	1	0
2	6	5					1	1	3	2																													2				2			2	1	0
2	2	2					0	0	2	1																													2				2			2	1	0
2	5	4					2	1	4	4																													1				2			2	1	0
2	5	2					1	0	0	0																													2				1			2	1	0
2	2	2					1	1	1	1																													1				2			2	1	1
2	2	1					0	0	2	1																													2				1			2	1	1
2	1	1					0	0	1	1																													2				1			2	1	0
2	6	5					3	3	5	3																													1				1			2	2	1
2	8	7					0	0	8	4																													1				1			2	2	1
2	10	7					2	2	8	3																													1				1			2	3	0
2	5	3					1	1	5	1																													1				1			2	1	0
2	3	3					2	2	2	0																													1				1			2	1	1
Sum	55	42					13	11	41	21																													2				1			2	3	0
																																							2				1			2	1	0
																																							2				1			2	3	0
																																							2				1			2	3	0
																Avgs																							1							2	1	0
	E5																E5 dorsal	E5 ventral	E6	E14																			2							2	1	0
	Lhx1	Lhx1+Pax2	Brn3a	FoxP1	FoxP2	FoxP4										Lhx1	92.3077	48.0797	56.5508	24.1845																			1							2	3	0
embryo1	0.80303	0.0757576	0.71875	0	0	0										Lhx1+Pax2	0	12.0199	17.3128	11.016																			2							2	1	0
embryo2	0.811321	0.0943396	0.763636	0	0	0										Brn3a	79.8077	44.8405	19.38	15.7835																			2
Avg	0.807176	0.0850486	0.741193	0	0	0										FoxP1	0	0	10.8586	10.6643																			2							Sum	69	11
Stds	0.00414523	0.00929102	0.0224432	0	0	0										FoxP2	0	0	10.2997	15.1429																			2
																FoxP4	0	0	4.92322	13.1429																			2
	E5 premigratory																																						1
	Lhx1	Lhx1+Pax2	Brn3a	FoxP1	FoxP2	FoxP4																																	2
embryo1	0.846154	0	0.75	0	0	0																																	2
embryo2	1	0	0.846154	0	0	0										Stds																							0
Avg	0.923077	0	0.798077	0	0	0											E5 pre-migratory	E5 post-migratory	E6	E14																			1
Stds	0.0769231	0	0.0480769	0	0	0										Lhx1	7.69231	5.9744	11.0963	5.36096																			2
																Lhx1+Pax2	0	1.4936	9.95989	1.92513																			2
	E5 postmigratory															Brn3a	4.80769	6.37899	2.30679	0.158514																			2
	Lhx1	Lhx1+Pax2	Brn3a	FoxP1	FoxP2	FoxP4										FoxP1	0	0	5.30303	2.97203																			2
embryo1	0.421053	0.105263	0.384615	0	0	0										FoxP2	0	0	0.543638	0.857143																			2
embryo2	0.540541	0.135135	0.512195	0	0	0										FoxP4	0	0	2.48419	1.14286																			2
Avg	0.480797	0.120199	0.448405	0	0	0																																	2
Stds	0.059744	0.014936	0.0637899	0	0	0																																	2
																																							2
																																							2
	E6																																						2
	Lhx1	Lhx1+Pax2	Brn3a	FoxP1	FoxP2	FoxP4																																	2
embryo1	0.454545	0.272727	0.170732	0.161616	0.097561	0.0740741																																	2
embryo2	0.676471	0.0735294	0.216867	0.0555556	0.108434	0.0243902																																	2
Avg	0.565508	0.173128	0.1938	0.108586	0.102997	0.0492322																																	2
Stds	0.110963	0.0995989	0.0230679	0.0530303	0.00543638	0.0248419																																	2
																																							2
																																							2
	E14																																						2
	Lhx1	Lhx1+Pax2	Brn3a	FoxP1	FoxP2	FoxP4																																	2
embryo1	0.188235	0.129412	0.15625	0.0769231	0.142857	0.142857																																	2
embryo2	0.295455	0.0909091	0.15942	0.136364	0.16	0.12																																	2
Avg	0.241845	0.11016	0.157835	0.106643	0.151429	0.131429																																	2
Stds	0.0536096	0.0192513	0.00158514	0.0297203	0.00857143	0.0114286																																	2
																																							2
																																							2
																																							2
																																							2
