# Supplementary material for: Spinal lumbar dI2 interneurons contribute to stability of bipedal stepping
Source: eLife. 2021 Aug 16;10:e62001. doi: 10.7554/eLife.62001 (PMC8448531; doi:10.7554/eLife.62001)
Supplement: Figure 1—figure supplement 3—source data 1. — The X/Y coordinates of large diameter dI2 and small diameter dI2 neurons in the crural and brachial spinal levels (Figure 1—figure supplement 3A and B). [file elife-62001-fig1-figsupp3-data1.xlsx]

## Sheet: Sheet1
dI2 all			dI2 Large				dI2 Small				dI2
Crural			Crural				Crural				brachial
x	y		x	y			x	y			x	y
346.568	581.162		507.537	778.08			346.568	581.162			516.696	731.369
528	572.023		520.233	767.102			528	572.023			558.705	693.171
603.305	548.053		501.348	702.976			603.305	548.053			552.512	593.624
606.577	513.314		511.055	568.611			606.577	513.314			502.469	157.851
642.703	478.189		480.95	644.522			642.703	478.189			495.816	662.443
243.152	639.692		592.331	528.995			243.152	639.692			595.995	668.462
469.825	739.86		440.147	790.547			469.825	739.86			614.663	595.815
507.537	778.08		500.291	731.35			538.789	350.394			632.745	736.909
538.789	350.394		462.131	612.171			579.525	786.675			375.604	468.563
579.525	786.675		565.123	243.963			670.62	527.92			641.178	775.37
670.62	527.92		590.239	637.817			471.917	725.086			638.778	604.352
471.917	725.086		608.802	515.683			566.317	547.081			343.524	287.755
520.233	767.102		439.954	712.574			650.946	507.892			590.052	502.652
566.317	547.081		529.206	736.277			517.22	197.615			592.007	583.141
650.946	507.892		466.337	656.098			528.116	722.39			659.443	716.762
517.22	197.615		624.651	709.343			542.974	529.269			645.219	668.385
528.116	722.39		489.402	692.698			555.02	565.316			699.834	635.47
542.974	529.269		519.047	292.205			571.543	681.625			471.201	718.917
555.02	565.316		532.003	548.249			632.872	510.043			492.98	625.972
571.543	681.625		469.496	643.429			663.882	478.588			577.994	689.621
632.872	510.043		450.047	628.728			702.49	514.279			574.744	456.637
663.882	478.588		618.591	599.238			427.391	549.064			625.604	683.422
702.49	514.279		554.522	732.551			572.663	685.348			627.702	539.481
427.391	549.064		495.172	704.647			600.952	372.995			687.02	830.573
501.348	702.976		539.831	659.837			618.282	721.006			480.143	422.339
511.055	568.611		325.349	587.406			642.062	505.044			655.914	599.724
572.663	685.348		420.01	547.638			668.31	552.19			667.25	703.25
600.952	372.995		702.5	320.974			683.339	498.75			565.576	577.897
618.282	721.006		564.565	496.737			427.148	542.359			608.917	771.7
642.062	505.044		334.352	657.334			463.992	379.835			625.143	698.643
668.31	552.19		436.719	594.974			510.579	791.23			637.393	601.429
683.339	498.75		484.365	703.43			636.265	559.945			689.894	684.758
427.148	542.359		469.721	623.242			635.276	511.612			510.588	666.373
463.992	379.835		663.045	301.189			694.863	454.371			594.076	596.569
510.579	791.23		537.227	218.266			581.532	711.11			594.48	681.03
636.265	559.945		522.044	556.506			673.486	528.486			681	565.94
635.276	511.612		271.918	731.699			679.454	481.83			492.146	698.246
694.863	454.371		377.194	688.756			488.789	531.895			487.048	529.571
581.532	711.11		399.46	669.256			612.306	478.895			504.148	648.148
673.486	528.486		448.664	278.35			625.094	535.655			587.023	724.582
679.454	481.83		270.482	580.932			629.692	457.972			653.888	653.284
488.789	531.895		508.286	312.194			720.746	350.014			556.24	659.26
612.306	478.895		263.418	570			396	690.667			653.835	721.722
625.094	535.655		604.075	432.106			533.909	472.909			666.083	594.667
629.692	457.972		484.533	415.535			549.13	527			602.591	423.748
720.746	350.014		405.193	639.633			564.636	480.636			637.361	621.437
396	690.667		351.228	711.807			429.149	515.605			439.688	734.695
533.909	472.909		537.972	727.053			526.673	746.651			579.279	633.792
549.13	527						632.291	476.891			639.984	571.563
564.636	480.636						658.507	502.224			645	510.289
429.149	515.605						397.704	281.352			667.227	600.047
526.673	746.651						466.327	422			593.763	664
632.291	476.891						479.979	440.426			620.928	614.987
658.507	502.224						530.947	530.872			620.77	500.184
397.704	281.352						551.991	638.921			671.401	776.703
466.327	422						641.794	512.19			551.078	522.133
479.979	440.426						646.52	462.092			619.237	784.842
530.947	530.872						253.578	551.241			610.571	674.676
551.991	638.921						448.883	655.623			623.276	485.966
641.794	512.19						464.731	522.064			629.822	572.515
646.52	462.092						493.544	385.701			612.879	704.606
253.578	551.241						553.744	778.453			661.626	495.162
448.883	655.623						630.861	680.859			641.268	561.951
464.731	522.064						645.355	518.348			631.113	769.913
493.544	385.701						364.7	210.1			632.367	546.406
553.744	778.453						421.25	374.292			611.522	724.044
630.861	680.859						490.071	223.833
645.355	518.348						611.856	452.347
364.7	210.1						637.112	730.876
421.25	374.292						654.462	537.042
480.95	644.522						394.776	405.529
490.071	223.833						582.679	739.113
592.331	528.995						575.797	610.119
611.856	452.347						589	539.5
637.112	730.876						692.132	507.264
654.462	537.042						506.034	718.017
394.776	405.529						509.566	683.868
582.679	739.113						528.5	572.68
575.797	610.119						566.941	593.544
589	539.5						586.81	516.544
692.132	507.264						618.588	764.866
506.034	718.017						500.131	745.515
509.566	683.868						512.849	673.191
528.5	572.68						544.735	525.281
566.941	593.544						541.52	775.587
586.81	516.544						575.683	443.171
618.588	764.866						587.917	485.271
500.131	745.515						591.372	543.389
512.849	673.191						308.528	319.045
544.735	525.281						495.369	777.201
541.52	775.587						571	541.452
575.683	443.171						575.923	571.115
587.917	485.271						243.316	431.579
591.372	543.389						270.483	380.632
308.528	319.045						443	524.279
495.369	777.201						508.288	835.527
571	541.452						583.755	712.154
575.923	571.115						639.87	545.093
243.316	431.579						380.178	502.223
270.483	380.632						592.114	554.1
443	524.279						523.125	798.978
508.288	835.527						589.393	587.09
583.755	712.154						600.717	717.311
639.87	545.093						604.698	531.88
380.178	502.223						216.144	431.938
440.147	790.547						490.059	610.303
592.114	554.1						568.32	545.54
523.125	798.978						577.667	734.8
589.393	587.09						608.444	578.181
600.717	717.311						604.04	712.58
604.698	531.88						510.968	613.842
216.144	431.938						597.255	712.745
490.059	610.303						630.176	497.848
568.32	545.54						374.153	550.458
577.667	734.8						430.05	613.322
608.444	578.181						578.459	791.615
604.04	712.58						596.619	563.921
510.968	613.842						404.694	584.204
597.255	712.745						438.22	551.455
630.176	497.848						545.378	658.902
374.153	550.458						594.324	538.667
430.05	613.322						619.076	493.788
578.459	791.615						595.478	544.609
596.619	563.921						687.012	349.817
404.694	584.204						719.976	315.285
438.22	551.455						720.259	367.115
545.378	658.902						343.602	254.011
594.324	538.667						669.492	516.154
619.076	493.788						329.889	586.978
595.478	544.609						565.726	504.104
687.012	349.817						609.82	636.297
719.976	315.285						599.964	553.25
720.259	367.115						633.671	504.629
343.602	254.011						444.382	797.325
669.492	516.154						468.219	224.562
329.889	586.978						504.165	763.235
500.291	731.35						552.249	563.73
565.726	504.104						600.972	681.929
609.82	636.297						627.33	563.249
599.964	553.25						645.99	424.959
633.671	504.629						366.312	153.906
444.382	797.325						382.217	588.995
468.219	224.562						458.829	669.615
504.165	763.235						496.651	248.326
552.249	563.73						613.691	525.5
600.972	681.929						636.87	486.351
627.33	563.249						652.587	352.696
645.99	424.959						657.645	744.806
366.312	153.906						667.856	674.379
382.217	588.995						479.313	769.576
462.131	612.171						489.856	412.138
458.829	669.615						491.642	822.925
496.651	248.326						593.014	596.839
613.691	525.5						635.773	335.5
636.87	486.351						645.623	495.929
652.587	352.696						420.859	517.808
657.645	744.806						467.641	402.928
667.856	674.379						570.537	273.976
479.313	769.576						581.08	187.824
489.856	412.138						609.196	631.393
491.642	822.925						480.571	667.582
565.123	243.963						684.316	705.513
590.239	637.817						678.634	520.354
608.802	515.683						352.141	511.438
593.014	596.839						458.516	481.774
635.773	335.5						494.154	690.358
645.623	495.929						639.145	516.036
420.859	517.808						665.754	361.437
467.641	402.928						411.912	570.035
570.537	273.976						475.183	582.287
581.08	187.824						507.959	555.737
609.196	631.393						550.435	641.493
480.571	667.582						543.174	500.457
684.316	705.513						563.984	531.078
678.634	520.354						581.206	501.882
352.141	511.438						255.265	667.316
458.516	481.774						492.338	125.662
494.154	690.358						537.648	627.625
639.145	516.036						601.305	690.318
665.754	361.437						476.063	373.924
439.954	712.574						584.164	310.806
411.912	570.035						615.08	726.58
475.183	582.287						614.5	627.579
507.959	555.737						633.598	377.068
529.206	736.277						652.022	391.511
550.435	641.493						436.345	535.436
543.174	500.457						470.914	619.806
563.984	531.078						482.361	667.592
581.206	501.882						486.681	753.791
255.265	667.316						511.571	473.929
492.338	125.662						590.596	547.702
537.648	627.625						666.081	400.963
601.305	690.318						515.063	502.54
466.337	656.098						541.74	306.08
476.063	373.924						594.664	513.208
584.164	310.806						301.202	666.607
615.08	726.58						476.376	532.743
614.5	627.579						485.347	495.133
633.598	377.068						513.991	768.027
652.022	391.511						537.255	485.604
436.345	535.436						576.32	437.1
470.914	619.806						602.156	463.978
482.361	667.592						328.793	575.047
624.651	709.343						396.336	519.588
486.681	753.791						389.083	285.741
511.571	473.929						428.464	678.214
590.596	547.702						502.01	615.49
666.081	400.963						545.081	569.96
489.402	692.698						557.856	588.982
515.063	502.54						633.773	410.485
541.74	306.08						394.517	673.416
594.664	513.208						398.711	316.267
301.202	666.607						492.024	841.059
476.376	532.743						516.284	458.081
485.347	495.133						552.915	578.862
513.991	768.027						589.088	623.733
537.255	485.604						288.95	693.107
576.32	437.1						331.786	513.495
602.156	463.978						347.775	280.625
328.793	575.047						365.272	624.146
396.336	519.588						416.205	594.313
389.083	285.741						450.506	707.843
428.464	678.214						470.468	864.039
519.047	292.205						480.453	696.702
502.01	615.49						406.473	274.007
532.003	548.249						464.761	659.039
545.081	569.96						444.2	361.089
557.856	588.982						613.318	631.955
633.773	410.485						622.98	290.34
394.517	673.416						647.231	144.436
398.711	316.267						443.945	502.285
492.024	841.059						535.178	454.644
516.284	458.081						561.669	653.287
552.915	578.862						607.956	260.088
589.088	623.733						417.791	259.349
288.95	693.107						420.431	208.081
469.496	643.429						422.006	594.119
331.786	513.495						606.675	549.393
347.775	280.625						625.021	168.084
365.272	624.146						425.487	520.959
416.205	594.313						497.378	593.433
450.506	707.843						569.013	349.229
470.468	864.039						578.968	533.232
480.453	696.702						388.348	543.871
406.473	274.007						513.573	730.238
464.761	659.039						726.741	368.237
444.2	361.089						736.69	302.396
613.318	631.955						570.405	654.506
622.98	290.34						598.739	526.209
647.231	144.436						620.291	410.049
450.047	628.728						492.1	361.711
443.945	502.285						492.7	194.4
535.178	454.644						573.138	620.086
561.669	653.287						400.222	582.263
607.956	260.088						459.786	275.114
618.591	599.238						636.549	408.314
417.791	259.349						581.407	524.457
420.431	208.081						606.867	514.455
422.006	594.119						628.571	493.429
606.675	549.393						461.695	638.153
625.021	168.084						448.417	801.251
425.487	520.959						488.288	480.519
497.378	593.433						394.967	516.079
554.522	732.551						433.432	544.014
569.013	349.229						500	589.757
578.968	533.232						615.371	424.348
388.348	543.871						642.189	515.868
495.172	704.647						567.105	532.442
513.573	730.238						332.115	505.397
726.741	368.237						347.008	496.78
736.69	302.396						430.046	764.431
539.831	659.837						475.074	770.442
570.405	654.506						502.097	667.53
598.739	526.209						530.435	958.722
620.291	410.049						552.553	464.576
492.1	361.711						556.862	564.087
492.7	194.4						320.659	577.415
573.138	620.086						455.029	554.907
400.222	582.263						467.839	826.161
459.786	275.114						522.283	510.033
636.549	408.314						590.771	597.6
581.407	524.457						376.018	304.6
606.867	514.455						552.16	687.577
628.571	493.429						273.894	629.192
461.695	638.153						500.975	533.594
448.417	801.251						504.021	710.737
488.288	480.519						687.986	333.279
394.967	516.079						298.137	816.025
433.432	544.014						301.431	646.785
500	589.757						312.896	593.513
615.371	424.348						314.472	628.167
642.189	515.868						425.361	539.835
567.105	532.442						551.073	675.698
325.349	587.406						490.798	449.539
332.115	505.397						523.429	680.857
347.008	496.78						585.89	716.266
420.01	547.638						616.435	414.968
430.046	764.431						376.319	696.209
475.074	770.442						600.291	403.552
502.097	667.53						309.266	567.418
530.435	958.722						358.208	493
552.553	464.576						431.976	644.094
556.862	564.087						559.787	451.426
702.5	320.974						256.985	564.751
320.659	577.415						333.651	694.444
455.029	554.907						384.579	502.082
467.839	826.161						282.239	259.451
522.283	510.033						291.092	210.482
564.565	496.737						301.121	583.177
590.771	597.6						414.912	610.716
376.018	304.6						534.214	838.568
552.16	687.577						329.738	621.345
273.894	629.192						425.773	500.766
500.975	533.594						425.976	564.536
504.021	710.737						599.02	716.574
687.986	333.279						456.975	534.025
298.137	816.025						559.951	298.634
301.431	646.785						327.011	521.195
312.896	593.513						430.241	344.667
314.472	628.167						432.556	320.333
425.361	539.835						501.274	377.443
551.073	675.698						600.111	525.691
490.798	449.539						679.029	455.629
523.429	680.857						522.167	531.321
585.89	716.266						521.608	531.294
616.435	414.968						560.823	488.234
376.319	696.209						582.5	729.659
600.291	403.552						612.985	486.351
309.266	567.418						625.113	570.132
358.208	493						441.892	507.59
431.976	644.094						538.728	551.28
559.787	451.426						592.36	599.413
334.352	657.334						564.542	552.567
436.719	594.974						590.714	519.133
256.985	564.751						610.435	680.203
333.651	694.444						267.386	363.693
384.579	502.082						464.245	421.618
282.239	259.451						470.085	682.766
291.092	210.482						498.111	203.148
301.121	583.177						541.263	721.421
414.912	610.716						558.108	463.843
534.214	838.568						580.695	269.331
329.738	621.345						379.762	586.608
425.773	500.766						471.692	451.179
425.976	564.536						563	506.558
599.02	716.574						679.304	537.456
456.975	534.025						701.461	551.745
484.365	703.43						261.512	549.124
559.951	298.634						379.225	603.401
327.011	521.195						557.875	511.438
430.241	344.667						568.927	452.945
432.556	320.333						361.455	426.879
469.721	623.242						472.13	545.424
501.274	377.443						470.261	251.882
600.111	525.691						506.964	501.302
663.045	301.189						453.113	283.576
679.029	455.629						455.805	521.746
522.167	531.321						461.163	559.405
521.608	531.294						502.806	523.367
560.823	488.234						603.056	279.514
582.5	729.659						291.663	779.117
612.985	486.351						416.955	472.668
625.113	570.132						461.258	520.919
441.892	507.59						577.904	271.142
538.728	551.28						304.589	529.367
592.36	599.413						319.759	506.552
564.542	552.567						400.872	442.584
590.714	519.133						359.49	543.653
610.435	680.203						400.844	475.156
267.386	363.693						405.593	229.441
464.245	421.618						439.795	146.35
470.085	682.766						458.815	324.793
498.111	203.148						473.328	630.358
541.263	721.421						488.913	593.253
558.108	463.843						571.521	523.84
580.695	269.331						584.572	487.289
379.762	586.608						253.366	217.843
471.692	451.179						306.267	184.779
563	506.558						325.245	223.357
679.304	537.456						387.43	354.636
701.461	551.745						449.708	651.646
261.512	549.124						489.057	379.758
379.225	603.401						618.571	724.857
537.227	218.266						273.236	702.283
557.875	511.438						297.137	651.027
568.927	452.945						351.286	358.299
361.455	426.879						378.449	507.372
472.13	545.424						455.211	693.394
470.261	251.882						477.536	482.601
506.964	501.302						489.324	746.649
453.113	283.576						542.502	532.685
455.805	521.746						301.68	608.636
461.163	559.405						524.229	644.029
522.044	556.506						595.135	521.694
502.806	523.367						308.123	737.246
603.056	279.514						358.611	515.839
291.663	779.117						539.609	301.324
416.955	472.668						562.387	233.985
461.258	520.919						567.882	748.16
577.904	271.142						277.328	539.046
304.589	529.367						335.289	583.485
319.759	506.552						453.412	587.849
400.872	442.584						297.431	519.206
271.918	731.699						412.756	315.294
359.49	543.653						456.581	218.7
400.844	475.156						566.696	492.163
405.593	229.441						259.291	499.527
439.795	146.35						291.157	438.565
458.815	324.793						309.783	534.95
473.328	630.358						567.383	463.309
488.913	593.253						289.381	255.571
571.521	523.84						297.759	326.862
584.572	487.289						376.018	498.418
253.366	217.843						616.333	534.667
306.267	184.779						437.676	584.373
325.245	223.357						455.573	536.922
387.43	354.636						484.887	264.125
449.708	651.646						523.328	556.055
489.057	379.758						660.031	499.247
618.571	724.857						680	376.489
273.236	702.283						414.86	655.167
297.137	651.027						440.074	728.833
351.286	358.299						510.025	417.953
378.449	507.372						530.205	531.157
455.211	693.394						541.571	493
477.536	482.601						691.52	558.272
489.324	746.649						272.684	596.296
542.502	532.685						417	684.447
301.68	608.636						573	465.128
524.229	644.029						587.921	260.395
595.135	521.694						286.841	562.385
308.123	737.246						323.627	609.542
377.194	688.756						366.555	558.943
358.611	515.839						436.537	578.854
539.609	301.324						440.345	523.224
562.387	233.985						533.748	301.344
567.882	748.16						619.864	698.038
277.328	539.046						399.283	757.545
335.289	583.485						428.538	601.638
399.46	669.256						442.767	701.628
448.664	278.35						534.128	597.154
453.412	587.849						564.095	522.369
270.482	580.932						238.619	541.762
297.431	519.206						268.879	568.588
412.756	315.294						533.378	466.489
456.581	218.7						554.558	693.047
566.696	492.163						566.43	514.64
259.291	499.527						588.087	473.761
291.157	438.565						284.054	457.066
309.783	534.95						542.324	437.826
567.383	463.309						595.441	384.382
289.381	255.571						597.154	771.138
297.759	326.862						625.642	219.122
376.018	498.418						649.265	257.235
616.333	534.667						146.778	593.121
437.676	584.373						187.089	521.006
455.573	536.922						318.525	763.735
484.887	264.125						381.936	357.433
523.328	556.055						411.717	617.802
660.031	499.247						434.394	296.38
680	376.489						462.953	169.656
414.86	655.167						500.143	484.384
440.074	728.833						509.876	371.18
510.025	417.953						637.807	571.33
530.205	531.157						646.19	272.929
541.571	493						227.422	567.651
691.52	558.272						469.816	697.52
272.684	596.296						474.865	569.243
417	684.447						541.835	690.514
573	465.128						222.779	492.372
587.921	260.395						228.3	541.224
286.841	562.385						282.078	609.948
323.627	609.542						436.836	513.91
366.555	558.943						489.933	561.748
436.537	578.854						484.908	356.757
440.345	523.224						480.782	517.818
533.748	301.344						600.2	520.6
619.864	698.038						617.8	578.4
399.283	757.545						645.549	383.155
428.538	601.638						278.46	562.101
442.767	701.628						332.77	474.791
508.286	312.194						420.73	462.8
534.128	597.154						523.357	528.942
564.095	522.369						551.906	402.107
238.619	541.762						679.566	271.346
268.879	568.588						293.98	617.936
533.378	466.489						398.905	629.848
554.558	693.047						225.058	510.83
566.43	514.64						215.23	419.391
588.087	473.761						263.5	694.871
263.418	570						283.697	506.205
284.054	457.066						305.724	476.263
542.324	437.826						308.913	583.022
604.075	432.106						352.706	467.088
595.441	384.382						377.418	509.455
597.154	771.138						375.423	608.627
625.642	219.122						403.794	591.353
649.265	257.235						410.442	614.308
146.778	593.121						423.41	458.816
187.089	521.006						431.535	517.419
318.525	763.735						469.671	600.733
381.936	357.433						539.735	444.393
411.717	617.802
434.394	296.38
462.953	169.656
500.143	484.384
509.876	371.18
637.807	571.33
646.19	272.929
227.422	567.651
469.816	697.52
474.865	569.243
541.835	690.514
222.779	492.372
228.3	541.224
282.078	609.948
436.836	513.91
489.933	561.748
484.908	356.757
480.782	517.818
600.2	520.6
617.8	578.4
645.549	383.155
278.46	562.101
332.77	474.791
420.73	462.8
484.533	415.535
523.357	528.942
551.906	402.107
679.566	271.346
293.98	617.936
398.905	629.848
225.058	510.83
405.193	639.633
215.23	419.391
263.5	694.871
283.697	506.205
305.724	476.263
308.913	583.022
351.228	711.807
352.706	467.088
377.418	509.455
375.423	608.627
403.794	591.353
410.442	614.308
423.41	458.816
431.535	517.419
469.671	600.733
537.972	727.053
539.735	444.393
582.175	755.131
