# Supplementary material for: Spinal lumbar dI2 interneurons contribute to stability of bipedal stepping
Source: eLife. 2021 Aug 16;10:e62001. doi: 10.7554/eLife.62001 (PMC8448531; doi:10.7554/eLife.62001)
Supplement: Figure 1—source data 1. — The X/Y coordinates of dI2, large-diameter dI2, and small-diameter dI2 neurons (Figure 1F). [file elife-62001-fig1-data1.xlsx]

## Sheet: Sheet1
dI2 all			dI2 Large				dI2 Small
Sciatic			Sciatic				Sciatic
x	y		x	y			x	y
657.392	670.3		657.392	670.3			595.683	429.638
595.683	429.638		491.368	633.154			635.046	682.827
635.046	682.827		683.16	662.909			662.522	412.721
662.522	412.721		756.385	709.475			676.585	313.231
676.585	313.231		734.796	703.229			719	400.5
719	400.5		628.33	555.6			740.365	437.429
740.365	437.429		534.982	425.887			761.505	521.242
761.505	521.242		561.543	588.663			600.777	690.786
600.777	690.786		637.307	619.37			680.321	567.786
680.321	567.786		629.355	610.037			418.436	578.038
418.436	578.038		667.327	705.112			651.222	646.889
651.222	646.889		584.688	558.134			696.749	422.965
696.749	422.965		698.268	700.837			691.818	613.697
691.818	613.697		668.485	693.764			511.185	481.519
491.368	633.154		678.219	657.356			496.636	553.083
511.185	481.519		681.749	702.357			593.297	548.713
683.16	662.909		662.446	717.998			709.743	597.311
496.636	553.083		671.621	672.905			756.331	756.646
593.297	548.713		617.778	594.926			540.208	442.477
709.743	597.311		630.775	642.898			585.457	590.329
756.331	756.646		778.047	578.731			591.295	708.357
540.208	442.477		665.743	686.134			618.755	767.043
585.457	590.329		578.642	689.809			699.702	762.372
591.295	708.357		578.694	594.975			795.014	681.054
618.755	767.043		614.421	708.65			701.639	504.301
699.702	762.372		624.962	702.501			478.147	493.735
795.014	681.054		615.633	644.341			591.985	604.154
701.639	504.301		607.568	690.389			680.744	508.895
478.147	493.735		616.441	706.466			764.5	523.452
591.985	604.154		610.845	641.203			535.52	405.446
680.744	508.895		655	591.073			560.927	468.195
764.5	523.452		712.825	721.599			650.606	667.806
535.52	405.446		647	694.905			667.153	673.91
560.927	468.195						684.286	710.714
650.606	667.806						428.398	403.78
667.153	673.91						498.305	424.779
684.286	710.714						562.929	463.459
428.398	403.78						634.817	465.753
498.305	424.779						646.562	497.795
562.929	463.459						432.361	367.722
634.817	465.753						486.333	510.758
646.562	497.795						563.023	544.567
756.385	709.475						644.363	414.67
432.361	367.722						662.214	432.339
486.333	510.758						530.434	687.776
563.023	544.567						681.463	706.769
644.363	414.67						509.035	686.455
662.214	432.339						724.333	559.062
734.796	703.229						261.824	825.816
530.434	687.776						542.393	626.952
681.463	706.769						612.451	662.154
509.035	686.455						647.305	738.735
724.333	559.062						655.075	676.264
261.824	825.816						274.322	534.898
542.393	626.952						312.015	508.03
628.33	555.6						318.545	461.673
612.451	662.154						487.301	397.783
647.305	738.735						576.503	426.991
655.075	676.264						628.703	495.069
274.322	534.898						698.114	641.907
312.015	508.03						690.548	665.097
318.545	461.673						374.62	364.215
487.301	397.783						558.745	478.83
534.982	425.887						605.101	408.025
561.543	588.663						534.214	495.5
576.503	426.991						542.556	449.111
628.703	495.069						638.25	514.625
698.114	641.907						528.056	538.676
690.548	665.097						559.593	525.374
374.62	364.215						567.057	443.205
558.745	478.83						661.009	500.518
605.101	408.025						454.396	584.491
534.214	495.5						530.045	408.182
542.556	449.111						571.849	453.808
638.25	514.625						653.469	524.021
528.056	538.676						698.102	618.93
559.593	525.374						404.13	648.183
567.057	443.205						695.403	621.742
661.009	500.518						421.832	634.994
454.396	584.491						507.591	585.895
530.045	408.182						502.692	427.513
571.849	453.808						591.256	461.446
653.469	524.021						607.364	539.061
698.102	618.93						630.535	819.606
404.13	648.183						337.679	788.071
695.403	621.742						365.405	597.792
421.832	634.994						480.623	498.705
507.591	585.895						629.384	417.52
502.692	427.513						657.228	384.118
591.256	461.446						424.346	630.393
607.364	539.061						507.202	492.833
630.535	819.606						568.226	417.943
337.679	788.071						657.452	475.571
365.405	597.792						401.367	506
480.623	498.705						527.449	489
629.384	417.52						644.82	621.787
657.228	384.118						453.969	517.562
424.346	630.393						648.679	748.923
507.202	492.833						579.049	599.439
568.226	417.943						395.25	498.817
657.452	475.571						406.732	512.488
401.367	506						422.065	632.981
527.449	489						691.976	645.714
644.82	621.787						699.857	731.866
453.969	517.562						702.551	758.43
637.307	619.37						309.623	418.93
648.679	748.923						440.957	387.72
579.049	599.439						474.646	383.438
629.355	610.037						538.488	322.665
667.327	705.112						531.417	375.5
395.25	498.817						638.933	608.467
406.732	512.488						727.453	597.774
422.065	632.981						439.467	364.2
584.688	558.134						470.338	384.215
698.268	700.837						598.531	446.215
691.976	645.714						615.97	588.455
699.857	731.866						710.689	705.835
702.551	758.43						718.948	537.707
309.623	418.93						744.269	689.344
440.957	387.72						793.39	680.09
474.646	383.438						295.621	460.913
538.488	322.665						676.873	743.442
531.417	375.5						494.273	428.273
638.933	608.467						670.373	774.833
727.453	597.774						670.13	423.417
439.467	364.2						426.902	617.975
470.338	384.215						491.422	479.8
598.531	446.215						510.513	426.829
615.97	588.455						539.42	468.708
710.689	705.835						591.659	391.171
718.948	537.707						645.457	748.181
744.269	689.344						437.82	619.243
793.39	680.09						151.311	772.121
295.621	460.913						161.023	578.539
676.873	743.442						543.964	719.494
494.273	428.273						711.228	677.535
670.373	774.833						450.484	594.992
670.13	423.417						548.022	654.311
426.902	617.975						571.566	427.974
491.422	479.8						447.327	589.921
510.513	426.829						696.133	521.795
539.42	468.708						617.041	675.411
591.659	391.171						631.675	535.571
645.457	748.181						683.492	694.862
437.82	619.243						698.771	733.117
151.311	772.121						693.845	475.609
161.023	578.539						372	692.742
668.485	693.764						387.091	555.54
543.964	719.494						444.172	527.793
711.228	677.535						539.737	450.632
450.484	594.992						556.856	522.631
548.022	654.311						652.907	692.5
571.566	427.974						720.266	364.596
678.219	657.356						763.71	627.47
447.327	589.921						763.246	685.54
681.749	702.357						96.6192	709.201
696.133	521.795						360.899	655.565
617.041	675.411						409.379	536.034
631.675	535.571						754.821	474.313
683.492	694.862						795.063	651.579
698.771	733.117						590.722	482.917
693.845	475.609						647.05	493.9
372	692.742						711	471.043
387.091	555.54						164.481	654.239
444.172	527.793						476.85	590.5
539.737	450.632						538.208	497.458
556.856	522.631						563.291	488.893
652.907	692.5						599.005	520.234
720.266	364.596						616.952	594.368
763.71	627.47						714.616	624.168
763.246	685.54						533.25	538.25
96.6192	709.201						622.827	423.753
360.899	655.565						675	517.667
409.379	536.034						708.235	683.117
754.821	474.313						377.837	560.404
795.063	651.579						596.392	459.349
590.722	482.917						661.698	390.264
647.05	493.9						711.568	597.676
711	471.043						713.921	622.809
164.481	654.239						767.667	581.024
476.85	590.5						652.89	386.354
538.208	497.458						677.165	496.538
563.291	488.893						756.197	556.906
599.005	520.234						490.5	461.071
616.952	594.368						697.766	682.635
662.446	717.998						569.458	323.931
714.616	624.168						756.76	707.617
533.25	538.25						653.038	721.502
622.827	423.753						668.813	519.813
675	517.667						675.328	708.603
708.235	683.117						749.338	481.492
377.837	560.404						331.881	519.463
596.392	459.349						493.823	430.354
661.698	390.264						517.856	644.538
711.568	597.676						565.379	526.485
713.921	622.809						626.625	373.75
767.667	581.024						642.133	688.1
652.89	386.354						656.357	599.071
677.165	496.538						736.354	600.451
756.197	556.906						327.516	626.234
490.5	461.071						426.571	552.612
697.766	682.635						492.28	518.12
569.458	323.931						506.444	716.37
671.621	672.905						585.964	484.667
756.76	707.617						636.386	458.591
653.038	721.502						545.582	526.764
668.813	519.813						580.721	565.721
675.328	708.603						624.491	384.973
749.338	481.492						649.469	727.052
331.881	519.463						687.693	527.883
493.823	430.354						728.053	628.684
517.856	644.538						761.627	666.676
565.379	526.485						518.967	554.596
617.778	594.926						553.708	641.108
626.625	373.75						660.039	512.686
642.133	688.1						681.562	666.062
656.357	599.071						699.873	614.192
736.354	600.451						719.219	520.594
327.516	626.234						734.05	708.497
426.571	552.612						489.28	282.962
492.28	518.12						617.64	716.584
506.444	716.37						612.881	442.051
585.964	484.667						659.222	589.801
630.775	642.898						677	658.627
636.386	458.591						693.31	496.08
545.582	526.764						743.528	487.189
580.721	565.721						572.329	493.421
624.491	384.973						320.613	262.236
649.469	727.052						547.612	545.143
687.693	527.883						592.766	675.31
728.053	628.684						595.469	180.844
761.627	666.676						651.04	801.36
518.967	554.596						697.098	595.23
553.708	641.108						522.319	354.667
660.039	512.686						547.415	659.06
681.562	666.062						555.715	454.93
699.873	614.192						581.675	419.11
719.219	520.594						601	535.314
734.05	708.497						612.896	439.201
489.28	282.962						624.989	537.687
617.64	716.584						647.268	272.768
612.881	442.051						668.286	292
659.222	589.801						721.116	537.826
677	658.627						384.051	634.795
693.31	496.08						572.845	604.994
743.528	487.189						576.15	684.433
778.047	578.731						678.119	694.403
572.329	493.421						683.679	524.717
320.613	262.236						758.864	694
547.612	545.143						484.839	564.536
592.766	675.31						586.097	746.129
595.469	180.844						611.162	514.216
651.04	801.36						612.245	442.286
697.098	595.23						625.887	550.676
522.319	354.667						645.353	387.118
547.415	659.06						670.256	261.326
555.715	454.93						669.77	470.824
581.675	419.11						672.789	233.901
601	535.314						696.307	360.333
612.896	439.201						717.235	332.941
624.989	537.687						754.628	572.359
647.268	272.768						789.634	571.508
668.286	292						329.582	505.878
721.116	537.826						520.703	632.168
384.051	634.795						522.913	553.775
572.845	604.994						575.629	505.472
576.15	684.433						596.993	626.178
678.119	694.403						685.29	502.435
683.679	524.717						700.204	550.367
758.864	694						435.991	525.914
484.839	564.536						502.94	621.22
586.097	746.129						594.211	296.028
611.162	514.216						607.635	741.99
612.245	442.286						655.025	575.373
625.887	550.676						475.255	293.891
645.353	387.118						518.26	584.808
670.256	261.326						521.472	422.056
669.77	470.824						524.781	276.031
672.789	233.901						571.612	259.061
696.307	360.333						599.871	675.905
717.235	332.941						643.071	557.071
754.628	572.359						645.368	658.098
789.634	571.508						700.833	683.333
329.582	505.878						718.595	595.103
520.703	632.168						755.463	572.307
522.913	553.775						425.553	382.026
575.629	505.472						465.82	222.344
596.993	626.178						492.605	184.263
665.743	686.134						518.757	217.946
685.29	502.435						550.044	190.289
700.204	550.367						672.163	520.187
435.991	525.914						731.167	566.389
502.94	621.22						366.753	562.309
578.642	689.809						606.273	607.485
594.211	296.028						682.567	628.646
607.635	741.99						691.056	193.389
655.025	575.373						500.277	410.638
475.255	293.891						588.398	217.74
518.26	584.808						582.683	440.923
521.472	422.056						660.523	625.788
524.781	276.031						675.896	515.729
578.694	594.975						432.202	576.705
571.612	259.061						535.386	524.432
599.871	675.905						553.111	614.111
614.421	708.65						580.104	692.593
643.071	557.071						678.378	612.044
645.368	658.098						268.24	569.524
700.833	683.333						663.855	557.945
718.595	595.103						711.145	733.447
755.463	572.307						615.875	516.729
425.553	382.026						662.083	612.698
465.82	222.344						684.199	533.454
492.605	184.263						683.583	615.683
518.757	217.946						719.486	508.857
550.044	190.289						732.362	591.213
672.163	520.187						737.718	508.225
731.167	566.389						494.33	419.948
366.753	562.309						519.195	475.251
606.273	607.485						594.343	487.186
624.962	702.501						525.432	484.673
682.567	628.646						600.429	211.341
500.277	410.638						687.432	559.081
588.398	217.74						710.303	549.603
582.683	440.923						712.168	517.832
615.633	644.341						576.153	544.431
660.523	625.788						617.469	519.338
675.896	515.729						646.194	704.24
432.202	576.705						719.794	490.962
535.386	524.432						775.198	347.186
553.111	614.111						443.97	456.903
580.104	692.593						607.478	516.275
678.378	612.044						676.953	152.728
268.24	569.524						701.698	526.016
663.855	557.945						698.224	447.857
711.145	733.447						703.564	568.358
615.875	516.729						690.309	580.277
662.083	612.698						440.791	558.432
684.199	533.454						621.705	587.693
683.583	615.683						662.184	574
719.486	508.857						465.242	225.403
732.362	591.213						582.621	581.505
737.718	508.225						624.888	735.597
494.33	419.948						652.727	686.152
519.195	475.251						726.717	596.109
607.568	690.389
594.343	487.186
525.432	484.673
600.429	211.341
687.432	559.081
710.303	549.603
712.168	517.832
576.153	544.431
616.441	706.466
617.469	519.338
646.194	704.24
719.794	490.962
443.97	456.903
610.845	641.203
607.478	516.275
701.698	526.016
698.224	447.857
655	591.073
703.564	568.358
690.309	580.277
712.825	721.599
440.791	558.432
621.705	587.693
647	694.905
662.184	574
465.242	225.403
582.621	581.505
624.888	735.597
652.727	686.152
726.717	596.109
