# Supplementary material for: Spinal lumbar dI2 interneurons contribute to stability of bipedal stepping
Source: eLife. 2021 Aug 16;10:e62001. doi: 10.7554/eLife.62001 (PMC8448531; doi:10.7554/eLife.62001)
Supplement: Figure 1—source data 2. — The X/Y coordinates of dI2 neurons expressing either vGlut2 or VIATT (Figure 1I). [file elife-62001-fig1-data2.xlsx]

## Sheet: Sheet1
dI2 VGlut2							dI2 VIAAT
Sciatic			Crural				Sciatic			Crural
x	y		x	y			x	y		x	y
740.5	497.75		560.25	539.75			382	634.25		684.75	464.75
605.5	553.25		593.25	398.75			637	694.25		519.75	491.75
658	767.75		555.75	767.75			769	683.75		639.75	704.75
664	797.75		458.25	731.75			458.5	650.75		290.25	553.25
635.5	442.25		675.75	460.25			514	202.25		510.75	532.25
619	797.75		537.75	502.25			640	661.25		465.75	340.25
686.5	419.75		656.25	622.25			647.5	323.75		635.25	577.25
397	440.75		507.75	505.25			643	419.75		636.75	388.25
497.5	220.25		489.75	788.75			607	586.25		650.25	761.75
610	308.75		557.25	569.75			679	343.25		543.75	812.75
580	817.25		338.25	542.75			712	376.25		635.25	689.75
668.5	773.75		234.75	550.25			517	466.25		467.25	515.75
608.5	791.75		323.25	515.75			583	421.25		576.75	554.75
742	439.25		611.25	487.25			605.5	413.75		554.25	637.25
677.5	446.75		620.25	623.75			587.5	383.75		521.25	572.75
677.5	484.25		369.75	506.75			617.5	242.75		566.25	695.75
721	448.25		399.75	554.75			560.5	466.25		675.75	688.25
626.5	337.25		404.25	680.75			631	481.25		669.75	686.75
635.5	401.75		365.25	514.25			568	482.75		429.75	515.75
706	578.75		455.25	590.75			601	439.25		537.75	451.25
592	422.75		480.75	689.75			746.5	517.25		380.25	584.75
604	310.25		350.25	556.25			536.5	560.75		500.25	511.25
646	341.75		299.25	547.25			679	413.75		480.75	595.25
689.5	380.75		534.75	584.75			632.5	803.75		387.75	491.75
602.5	379.25		351.75	559.25			721	706.25		653.25	481.25
649	406.25		314.25	553.25			658	808.25		528.75	529.25
602.5	442.25		486.75	556.25			715	719.75		407.25	617.75
466	545.75		638.25	466.25			709	704.75
610	368.75		638.25	488.75			682	721.25
608.5	388.25		662.25	488.75			566.5	701.75
679	407.75		522.75	562.25			574	641.75
665.5	704.75		656.25	563.75			622	589.25
748	637.25		557.25	604.25			635.5	643.25
535	689.75		491.25	806.75			709	572.75
715	754.25		527.25	536.75			521.5	664.25
763	623.75		662.25	535.25			676	547.25
679	404.75		251.25	574.25			511	674.75
512.5	755.75		342.75	545.75			730	812.75
469	715.25		303.75	551.75			593.5	502.25
578.5	721.25		543.75	365.75			718	499.25
410.5	446.75		603.75	368.75			656.5	515.75
508	392.75		486.75	520.25			509.5	592.25
755.5	667.25		654.75	481.25			722.5	580.25
683.5	634.25		518.25	520.25			499	664.25
791.5	716.75		476.25	754.25			521.5	659.75
716.5	746.75		294.75	545.75			520	784.25
718	575.75		612.75	503.75			658	748.25
728.5	626.75		317.25	560.75			452.5	716.75
773.5	668.75		662.25	577.25			562	518.75
793	716.75		533.25	508.25			740.5	530.75
739	769.25		333.75	526.25
541	604.25		278.25	541.25
725.5	694.25		437.25	533.75
677.5	683.75		681.75	500.75
584.5	242.75		626.25	590.75
734.5	631.25		245.25	611.75
736	686.75		492.75	539.75
641.5	554.75		654.75	544.25
529	706.25		587.25	512.75
577	446.75		668.25	566.75
649	436.25		534.75	532.25
509.5	712.25		455.25	704.75
586	776.75		638.25	550.25
470.5	364.25		650.25	551.75
691	622.25		333.75	532.25
620.5	694.25		534.75	550.25
445	590.75		632.25	640.25
437.5	671.75		527.25	551.75
716.5	406.25		666.75	566.75
712	503.75		632.25	485.75
703	593.75		653.25	535.25
772	527.75		473.25	550.25
680.5	559.25		521.25	554.75
655	595.25		417.75	683.75
623.5	656.75		375.75	559.25
722.5	725.75		638.25	595.25
712	514.25		368.25	538.25
725.5	488.75		674.25	548.75
698.5	661.25		612.75	455.75
695.5	457.25		542.25	500.75
694	647.75		471.75	596.75
749.5	436.25		639.75	586.25
727	670.25		392.25	607.25
715	644.75		504.75	599.75
709	551.75		518.25	482.75
686.5	572.75		632.25	599.75
784	692.75		701.25	398.75
590.5	605.75		495.75	803.75
449.5	604.25		521.25	707.75
677.5	509.75		534.75	763.25
763	776.75		450.75	752.75
694	778.25		432.75	611.75
668.5	652.25		461.25	572.75
616	470.75		473.25	707.75
718	721.25		413.25	581.75
562	649.25		599.25	601.25
773.5	521.75		531.75	508.25
758.5	521.75		540.75	596.75
736	662.75		414.75	604.25
725.5	793.25		617.25	628.25
650.5	794.75		468.75	634.25
574	668.75		554.25	730.25
602.5	770.75		674.25	626.75
604	749.75		611.25	625.25
671.5	731.75		258.75	596.75
670	715.25		482.25	611.75
589	676.25		642.75	568.25
584.5	781.25		377.25	635.75
770.5	754.25		698.25	355.25
379	287.75
476.5	617.75
655	413.75
787	712.25
566.5	481.25
781	706.25
347.5	317.75
389.5	337.25
746.5	667.25
455.5	665.75
734.5	692.75
722.5	673.25
722.5	602.75
