# Supplementary material for: Spinal lumbar dI2 interneurons contribute to stability of bipedal stepping
Source: eLife. 2021 Aug 16;10:e62001. doi: 10.7554/eLife.62001 (PMC8448531; doi:10.7554/eLife.62001)
Supplement: Figure 2—figure supplement 1—source data 1. — The X/Y coordinates of precerebellar neurons (Figure 1—figure supplement 1B) and dI2 synapses (Figure 2—figure supplement 1C) at the crural level. [file elife-62001-fig2-figsupp1-data1.xlsx]

## Sheet: Sheet1
Pre-cerebellar neurons				dI2 syanapses
Crural				Crural
x	y			x	y
361.125	233.694			97	614.5
412.649	276.784			98.5	617.5
531.689	361.867			110.667	548.333
563.371	421.071			119.2	675.2
585.893	277.746			156.5	601
601.436	415.113			172.5	559
358.669	275.573			172	814.5
440.592	320.709			176	811
471.869	381.83			185	552.5
502.903	373.091			190.5	549.5
512.573	302.431			190	813
539.936	306.625			198	523
630.545	467.642			199.5	552.5
356.604	295.377			214.5	763
436.106	266			215	415
474.35	337.683			215	559
482	319.912			219	416
478.71	365.339			219.667	521.667
487.056	405.733			222.5	417
529.645	473.31			225	580
494.821	525.59			235	575
530.698	439.086			241	542
548.5	283.821			244	464
552.991	538.788			251.286	422
569.509	454.585			252	471
578.812	372.083			265.5	435
612.054	438.453			269	620
375.797	247.79			272	629
470.295	273.873			273	777.5
470.652	323.333			278	606
507.1	300.552			285.25	894.5
510.168	260.768			285.889	884.333
530.457	245.978			295.333	615.333
591.626	394.247			301.6	572.8
591.843	454.887			304.5	494.5
332.318	271.497			306.333	749.333
356.732	269.147			308	730
367.564	294.085			309	667
408.023	275.465			310	790
429.041	408.871			315	743
440.097	450.468			316	499
527.143	427.19			316.5	586.5
558.648	400.931			321.667	507.333
588.848	437.641			322.667	600.667
332.14	244.42			324	530
524.328	272.72			337	645
548.051	376.415			339.667	604.667
576.288	388.859			342.5	627
631.691	468			347.5	545
464.969	390.406			347	614
465.643	366.143			350	457
493.868	306.69			350.4	477.2
495.738	370.357			353	621
560.347	435.406			354.5	476.5
380.186	263.559			354	532
496.075	330.6			357.333	454.333
611.554	444.877			358.5	486.5
632.464	467.619			360.333	489.333
364	240.186			361	315
477.803	281.714			362	504
489.318	578.318			364.6	452.2
521.237	303.509			365	819
538.05	244.025			366	448.5
590.268	401.505			366	535
608.889	403.99			371.833	448.167
621.805	417.973			372.5	511.5
341.703	291.27			374	873
478.471	451.451			375.5	619.5
521.928	340.841			380.714	812.571
527.809	522.004			380	672
526.263	399.75			381	535
539.157	284.517			384.875	812.375
554.317	292.297			384.5	863
622.13	425			390.2	441.6
457.185	303.343			390	536
514.423	439.574			390.5	857
563.045	385.394			391	539
576.217	402.833			393	538.5
390.815	448.351			393	604.5
393.996	478.215			393	659.5
450.672	122.699			395	814
463.508	448.938			398.333	579.333
466.037	325.414			400.5	438
515.481	301.009			401.5	775
564.52	396.62			405.25	436.25
572.394	413.833			407.5	455
346.457	305.595			411	560
456.711	318.819			412.5	810
485.966	294.879			415.5	807.5
523.554	379.07			421.75	430
555.454	322.502			422	759
459.43	473.85			425.5	779
486.439	462			427.5	807
535.751	329.024			433.5	520.5
555	292.991			435	731
625.946	419.991			435	787
644.122	461.066			435	789
679.019	321.337			436	727
349.428	732.697			439	427
435.4	435.325			438	740
498.967	409.517			440.333	671.333
503.674	286.081			441	780
516.969	328.674			440.667	803.667
571.849	289.089			441	733
560.121	467.343			443	729.5
381.214	295.024			445	778.25
409.493	499.977			446.667	633.333
451.803	232.859			446.5	637.5
462.5	354.222			446	698
482.277	388.149			446.5	788.5
489.224	366.069			447.5	719.5
493.842	233.316			449	693.286
395.331	305.062			452.333	418.333
664.229	677.608			454.333	691.333
485.136	504.576			454	696.5
491.906	356.01			455.4	706.8
499.079	306.264			457	719.5
519.107	439.791			458.5	778
524.861	319.129			465.667	652.667
523.333	469.333			468.5	641.5
463.19	365.415			470	384
510.114	291.825			471	529
518.833	300.667			475	632
550.413	266.727			475.5	668.5
568.181	531.874			478.667	527.667
669.197	711.848			479.667	778.667
440.186	479.024			484	537
505.741	300.049			485.833	771.167
602.528	418.283			485	792.5
423.462	435.682			485.75	808.875
460.496	504.963			486.556	375.778
464.738	465.492			486	865
516.021	317.787			488	540
531.066	342.082			489.5	368.5
573.453	290.866			490	795.5
577.536	549.252			495.667	786.333
402.525	421.722			497.875	360.875
430.36	506.504			501.5	601
447.44	353.507			505.333	783.333
484.093	328.85			505.5	779.5
480.812	360.159			510	547.5
490	378			515.5	546
510.419	292.613			516.333	634.667
528.895	459.397			522	345
557.036	295.921			522.333	540.333
575.99	489.137			525	672
409.06	476.832			526.333	343.667
492.191	362.698			527	692
487.333	425.824			528.5	516
490.786	506.143			533.667	767.333
516.95	585.65			533.667	790.667
477.569	423.431			535.4	774.8
486.745	416.606			536.5	761
509.45	508.464			537	781
534.326	321.147			537.5	788.5
542.914	501.684			539	654.5
348.689	474.831			539	658.5
349.564	491			540	763.5
368.132	495.199			542	888
428.298	423.923			542.5	761
449.432	346.698			543	337
461.725	300.538			544.5	783
518.585	309.653			546.5	778.5
536.597	365.157			551.4	773.8
384.562	251.297			555.6	686.2
383.208	173.245			555	761.5
399.128	442.051			590	669.5
406.746	425.06			600.5	547
516.209	462.921			602	508
530.626	270.321			604	673.5
564.104	432.812			608	381
628.629	564.66			643	736
452.221	227.469			643	738.5
562.545	548.837			646	492
614.185	342.422			647	466
647.637	299.284			648	636
466.657	447.186			649.5	630.5
499.439	537.599			655	629
521.63	461.665			660	448.5
578.877	330.508			662	539
609.335	300.128			666.333	897.333
421.883	259.202			670.667	880.667
423.524	312.592			683	543.5
434.6	276.133			691	550
442.112	538.468			693	348.5
467.253	465.749			700	425.5
545.992	463.66			707	171
573.619	322.515			725.5	341
598.081	310			743	281.5
606.551	519.96			746.571	264.286
617.613	297.675			78	771
426.025	547.758			163	606
440.633	512.975			166	717
544.625	469.542			199.667	510.667
574.684	272.228			217	880.5
585.925	532.528			218.4	829.2
382.113	563.403			236	647.5
411.177	478.76			236	686
449.854	448.451			240	692.5
473.492	272.966			246	325
517.841	504.136			249	323.5
536.108	328.398			250.5	698.5
551.416	394.823			251	360
569.296	305.408			257	710.333
606.056	328.556			257	693
621.802	408.645			257.5	706.5
459.284	437.844			260	208
472.951	464.944			260.429	683.286
496.233	385.728			260	688
537.135	381.549			267	471.833
547.588	407.912			267	818
584.141	407.231			269	587
426.939	481.76			271.5	153
427.166	327.479			271.667	184.667
448.41	339.744			271	586
530.226	376.346			276	182
548.426	406.044			276	722
581.782	336.711			279	703.167
582.109	377.382			285	159
405.139	477.076			287.5	149
517.172	533.554			298.875	890.125
555.016	319.438			299.333	139.333
558.358	449.418			312.333	130.667
401.342	474.504			324.6	117.2
464.136	494.566			331	349.5
515.357	314.701			336.5	104.5
544.114	511.891			346.6	92
591.713	361.138			346	422
601.518	375.753			351	848.5
414.747	524.089			354.8	847.4
507.462	796.692			359	293
547.069	366.011			361	846
564.482	351.296			373	876
563.179	386.115			375	838.5
596.33	355.538			378	839
631.651	384.651			382	838
417.721	271.162			405.333	900.667
423.224	505.382			458	682
518.911	362.244			459	677
519.655	381.478			464.5	625
574.713	354.106			467	719
615.76	378.719			469	798
401.822	499.203			472	783
500.278	402.064			474	455.5
509.3	440.853			479	795.5
523.845	342.218			486.167	650.167
533.444	319.136			489.875	651.5
571.554	305.464			489	796
579.581	322.558			492	483.5
365.978	452.902			494.2	652.4
496.826	368.401			493.5	790.5
582.646	347.739			500	710.5
595.391	527.891			500	863
526.649	359.631			505.333	490.667
524.483	379.678			508.5	811.5
533.54	394.31			522	548
589.188	354.592			522	550
464.553	396.596			528.2	857.6
516.211	321.577			550.8	692.4
484.383	442.309			557.5	378.5
501.229	430.757			566.333	910.333
518	408.364			567	570.5
536.92	470.363			577	639
362.956	283.8			590	268.4
481.993	395.214			589.25	625
507.954	415.769			601	949
543.55	346.5			609	677
547.713	317.517			611	190
596.867	362.562			631.5	962.5
386.277	481.712			638.5	962
437.31	301.085			643	373
468.805	334.458			665.5	683
550.505	323.495			666	385.5
596.404	435.851			686.8	940.4
427.464	212.057			691.2	943.6
546.701	340.695			691	863.5
568.481	329.58			711	185
572.124	439.128			726.875	470.125
583.026	294.372			727	467
611.668	277.635			735.5	338.5
632.062	327.544			749	353
539.057	686.292			103.2	842.6
550.183	347.627			104	580.5
576.806	483.247			126	614
593.781	350.046			132.4	545.2
428.281	248.573			150	527.5
455.6	459.065			190	819.5
472.645	462.282			191	823
490.925	257.575			234	452
504.426	349.492			238	452
532.162	321.2			239.429	633.429
569.3	309.166			238	694.5
600.53	248.867			244.125	388.875
375.853	476.298			250	570.5
516.082	348.421			257	185
525.102	331.763			258	565
555.454	342.377			261.5	852.5
572.212	318.228			262	672
469.022	335.33			269.667	216.333
510.823	410.694			271.5	269
519.542	383.364			292	695.5
559.778	366.933			294.5	130
564.322	324.444			297.889	114.667
572.168	396.429			297	281.5
443.268	404.537			302	281.5
464.742	392.393			308.4	478.2
485.718	376.038			311	286.5
493.181	424.419			314.8	893.6
596.338	712.801			317	109
389.453	609.884			320.5	868.5
432.091	477			320	872
514.422	387.109			321	99
573.093	323.329			321	875
564.211	346.101			322.5	872
429.432	492.468			323	93.5
444.1	599.45			326.5	285
497.37	401.029			327.667	92.3333
522.181	380.029			330.889	86.1111
532.25	414.955			338.889	846.667
540.769	320.098			339	855
590.368	342.522			342	258
621.69	379.881			343	838.5
378.482	254.313			345.4	838.8
410.277	465.755			348.667	829.5
411.431	248.677			350.714	791.571
434.354	484.142			351.333	533.333
514.634	319.268			357.333	59
539.291	263.527			357	296
293.218	534.115			376.25	296.875
427.822	230.478			376.5	526.5
429.047	414.287			377.5	300.5
486.416	372.398			378	823.5
524	624.863			381.2	530.1
622.704	531.867			380.5	536
575.668	398.362			381.286	954.143
586.954	288.533			382	372
621.877	591.873			388.6	536.2
623.098	645.463			389	340.5
436.112	238.736			396.5	303
581.857	434.443			400	283
597.316	244.611			403	282
594.567	461.812			405.5	517.5
601.397	281.151			409	302
615.802	601.235			411	303
619.374	672.259			421	518.5
621.248	350.068			424	514.5
331.78	600.17			429.667	523.333
378.795	262.727			429	948
426.759	295.414			430.75	927.75
439.576	475.424			435	663
472.207	341.103			438	781
490.863	365.49			443.5	527.5
489.156	427.933			447	524.5
497.111	337.028			449	518
400.096	475.574			453.5	512.75
455.888	460.112			455	918.5
488.423	517.91			456.333	609.333
506.263	332.15			463	781
539.587	297.332			465	704.2
540.49	258.151			468	623.5
579.157	363.27			468	636
612.658	373.009			468	653.5
385.245	502.538			474	427
504.689	391.081			477	944
553.233	307.37			478.2	882.6
554.03	385.485			479	740.5
577.978	323.403			480	738
623.896	357.657			480.6	840.8
313.659	268.432			481	385
342.719	489.412			481	734.5
420.708	709.938			483	734
465.404	343.607			483.667	816.333
482.421	383.653			483.5	853
466.927	709.4			483.5	879
494.131	289.729			484.5	828.5
513.972	329.784			486	764
547.968	316.618			489.5	712.5
430.801	405.723			492	527
475.817	485.734			492	745.5
487.427	442.646			493	712.5
507.222	348.571			495.833	430.167
369.482	294.059			495.667	713.333
379.683	452.548			500	714.4
389.864	489.136			499	756
435.878	471.986			501.5	746.5
510.123	467.205			503	714
507.595	313.714			503.5	753.5
583.137	369.016			507	743
483.326	290.717			514	566
533.771	274.086			514	856.5
537.301	354.015			516.333	635.333
541.696	330.991			516.667	890.333
553.028	340.625			517.333	716.667
550.333	393.361			520	569
576.106	398.235			523.571	486.714
583.627	367.279			525	575.5
280.578	610.164			527	774
437.563	495.502			527.5	695.5
535.109	456.234			529	558
483.508	387.857			531	478.75
484.808	369.885			531	760
539.808	352.542			532.5	483
566.244	360.437			532	509.5
480.238	386.877			540.5	481.375
559.908	322.721			541	723
570.941	344.513			545.5	483
604.408	396.585			549.75	728
380.557	483.547			559.833	661.833
511.286	389.367			561.667	718.333
519.962	454.962			561	721.5
546.387	808.837			578.667	719.667
547.226	339.698			579	887
569.873	336.27			583.333	703.667
582.619	356.024			585.75	778
465.082	362.192			589	744.5
507.491	327.453			593.5	702.5
509.556	376.986			599.6	537.2
523.489	397.33			600	755.5
543.302	298.201			608	868
444.981	375.741			611	685
459.554	405.079			611	489
486.148	336.074			613.625	724.75
518.242	339.818			615	686
535.249	288.265			615	693
561.43	394.009			616.5	666.5
508.307	442.731			619.5	670
517.519	348.058			626.333	548.667
523.667	390.767			631	550
529.868	466.538			632.5	605.5
600.204	354.883			634.333	596.333
612.961	696.21			634	600
339.459	649.205			635.667	613.333
490.702	434.787			645	962
498.676	774.662			651	968
505.306	360.472			651	973
527.459	343.351			656	636
536.848	416.109			656	967
557.973	377.616			668.333	916.667
569.902	721.621			669	913
607.188	428.607			672	575
615.571	467.592			673.857	915.857
646.883	649.506			678	877
499.833	352.021			679.25	938.25
552.417	645.635			686.5	934
572.971	337.422			692.6	930.8
341.964	265.06			693.778	859.111
370.98	286.571			694	935
451.797	427.805			696	587
498.434	320.855			699	939
531.443	301.035			700.333	845
530.942	276.57			701	828.5
590.96	420.516			718.667	527
592.353	336.302			719	385.5
602.153	635.398			733.333	726.333
612.521	334.16			738	561.5
612.585	404.615			738	321.5
642.027	564.453			741	285
648.923	610.192			743	294.5
421.742	467.516			744.5	314.5
478.22	465.5			744.286	263.857
509.129	367.327			744	340
507.611	392.653			746.667	242.5
518.92	408.3			747	320
536.014	355.957			751	354
531.15	326.975			57	737
545.749	374.118			160	497
540.046	440.515			163.8	477.4
514.727	413.952			164.5	484.5
523.589	350.956			167	480
572.791	339.273			189	437
567.511	475.386			198	862.5
598.533	375.733			202.333	861.333
496.852	364.639			207	600.5
498.882	405.094			219.6	607.2
540.535	332.468			257	614.5
551.654	291.385			264.2	239.1
569.022	333.482			269	201.5
415.514	481.303			272	242.7
427.846	461.577			311.5	849
493.987	438.511			317.571	842.286
506.514	355.518			323	445
498.125	282.906			326	301.5
564.241	437.161			347.3	516.1
570.375	409.03			352.333	86.3333
579.586	379.386			352	489
480.46	434.248			353	722.5
508.618	415.882			355	492.5
519.379	315.879			366	682
521.083	374.233			371	525
581.881	329.483			373.25	696
581.941	350.312			375	701
601.054	364.846			376	706
461.665	472.375			377	712.5
531.49	277.075			384	719.5
546.274	345.081			387	722
594.638	351.768			388	725.5
528.08	333.954			388.5	728.5
530.188	310.753			413	737.5
550.691	313.949			414	516
569.661	340.078			417	740
529.436	347.808			419	528
540.109	329.984			422.8	536.7
570.603	334.96			427	541
577.123	316.447			427.5	716
587.234	363.28			430.125	543.625
504.429	358.343			433	537
544.303	319.701			436.4	552.2
562.946	335.95			439	552
576.34	435.46			441.5	534
589.63	332.849			441.5	763.5
543.555	286.185			442	773.5
554.962	291.84			453	505
571.843	250.113			454.667	764.667
592.07	252.362			454	796
593.223	343.717			456	683
595.028	366.007			461	779
595.663	313.98			467	788
673.127	320.27			468	820.5
458.502	733.184			481	613
525.604	291.195			485.667	618
581.023	574.65			487.75	625
603.873	311.658			488	621.5
643.635	196.808			513.5	567
568.716	647.134			521.667	628.667
607.5	290			536.167	912.833
631.782	292.8			536	919
651.579	283.944			540	907.5
391.239	225.897			587.5	746
494.205	383.149			590	740.5
628.157	306.681			623.5	709
637.291	337.698			641	566
385.785	288.108			652	318.5
500.156	401.649			660	560.5
552.366	345			684	900
609.243	324.495			731.667	410.667
629.425	592.708			128.333	765.333
483.892	633.995			198.6	875.2
541.418	323.897			209.333	571.667
559.705	328.996			211	796
579.188	362.137			216.5	818.5
590.516	309.031			225	808.5
593.864	321.322			230	842
612.315	567.289			237.667	473.333
375.433	272.168			251.667	214.667
583.426	324.149			251.667	348.333
594.136	295.072			255	197.5
597.28	566.335			270.333	352.333
323.93	296.233			276.5	166.5
361.18	319.22			276	531
465.473	385.054			283	154
536.573	382.056			284	564
598.09	639.124			297	723
654.646	643.743			301	732
446.508	594.074			302	737
487.467	424.835			305	612.5
553.359	320.035			311	625
574.402	275.794			311.667	769
594.644	179.898			315.833	786.167
607.675	298.715			319.5	94.5
616.586	266.75			324.5	506
638.147	296.932			325.5	528.5
502.301	355.9			327	509.75
568.171	398.885			359	633.5
412.017	428.879			372	783
541.29	313.2			373.8	634.4
587.756	372.767			376.667	631
607.676	379.811			377	986
399.119	461.238			378.667	638.667
509.882	292.41			380	675.5
518.481	327.133			382	682.5
526.977	348.717			383.5	647
552.975	304.059			387.5	600.5
564.622	394.713			387.667	636.333
574.549	351.705			388.333	774.667
586.54	406.127			390	658
608.576	394.715			390.667	676.667
523.66	315.583			396	712
554.571	291.226			400.5	715
563.378	330.846			404	722
561.567	349.615			406.6	529
563.355	648.649			409	720
568.454	286.277			418.8	634.4
610.695	365.148			423.6	593.8
457.372	416.831			426.5	606.5
525.862	227.503			430	650
567.483	630.6			432	621.5
577.292	275.522			437	745
585.899	291.457			439	660.5
590.881	620.595			440	741
336.2	231.747			445.125	674.125
357.508	234.944			448.5	627
553.532	325.484			448	725
558.191	254.671			449.5	639.5
572.204	653.796			451.5	678.5
583.796	338.427			452	726
608.193	316.773			454	644
534.105	396.918			457	699
564.068	240.753			459	642
595.688	318.866			462	647
585.951	256.893			464	691.5
611.345	696.366			466	688.5
621	239.995			466	976
621.709	409.477			469.5	694.5
627.853	282.059			470	515
637.855	579.207			471	510
520.215	630.719			473.5	696.5
528.165	408.823			474.5	507
562.077	303.898			480	660
586.8	339.754			489	583.5
595.857	378.76			495.667	709.667
477.487	349.077			498	600.5
483.225	360.461			498	696
491.969	384.083			499	522
574.257	286.108			499	680.5
395.318	839.801			503	739.5
461.831	392.684			506.25	691
486.505	413.276			508	606.5
535.908	410.934			512	743
536.538	314.987			513	722
564.787	296.934			517	615
572.041	409.959			519.6	729.8
588.427	322.332			521	723
585.687	616.424			522	731.5
635.121	306.553			522.5	734
415.327	468.782			526	680.5
465.619	337.703			528	666
525.292	766.663			532	716
557.179	374.71			532	718.5
564.371	321.835			533	714
620.75	625.208			534	662.5
409.838	438.471			537.333	670.833
470.851	767.041			537.667	822.333
507.881	381.875			540.2	657.8
537.582	331.187			541	410
570.158	302.674			541	740
590.676	670.731			541.4	831.2
629.439	634.895			543	667.286
617.679	710.875			543.333	916.667
524.671	370.566			545.125	752.875
546.572	391.202			544	912.5
576.962	355.661			545.833	632
483.475	396.494			547.25	916.375
476.005	808.08			552	624
501.4	360.72			555	596
543.875	330.833			571	775.5
547.667	309.296			575	615
402.335	239.471			578.2	782.4
469.581	522.116			590	642
494.223	417.598			591.333	693.667
501.432	384.136			593	623.5
559.55	347.388			596.5	679
582.943	383.16			602	694
				606.667	796.333
				609	797
				610	554.5
				611	641
				612.5	799
				618	766
				623	597
				623	972
				629	852
				635	602.5
				637.2	1006.4
				637.5	978.5
				640	972
				645	815.5
				646	804
				649	977
				659.571	537.286
				660.429	749.143
				663.5	561.5
				664	549
				671.7	594
				669.333	732.333
				680.667	595.333
				681.4	884.2
				682	890.5
				683	867
				686.429	888.714
				709	777.5
				719.333	606.333
				731	417
				735.5	723.3
				735.25	615
				738.5	718
				741	714
				744	316
				745.75	705.875
				745	264
				747.4	310.8
				748	702
				190	580
				197	665.5
				207.167	653.167
				226.5	822
				243	836
				245.5	823.5
				247	701
				250	454
				254.5	190.5
				255	203.25
				255	816
				258.5	837
				260	714
				261.5	193.5
				267	715
				269	716
				273	160
				279	167.5
				284	822.2
				293	476
				316	811.25
				316.75	819
				321	821.5
				324	563
				326	565
				337	571.5
				342.25	544
				343	633
				353.5	518
				355	653
				356	488
				357.667	648.556
				359	488
				360	632
				361.333	526
				363.889	487.444
				362.8	612.6
				362	641.5
				364.5	522.5
				364	525
				366.167	586.833
				366.5	623.5
				366.667	634.333
				366	648
				367	637
				368	646.5
				369.5	682
				370	635.5
				370.5	647.5
				371.5	335
				373.286	520
				381.429	520.429
				382	593.5
				386	621.5
				388.5	506.5
				389	649
				391	627.833
				391.5	510.5
				398	525.5
				409	578
				409	689
				410.333	554.333
				410	733
				411.5	597.5
				432.1	517.2
				431.5	523.5
				437	526
				437	798
				440.5	525
				446.5	525.5
				449	268
				454	671
				459	537.5
				460.667	642.333
				462.2	529.4
				468.5	542
				470.333	549.333
				475	725.5
				476	522.5
				478.4	531.2
				479	719.5
				479.25	733
				480	646.5
				481	569
				482	574
				486.333	561.667
				487.5	531.5
				488.333	744.556
				488.5	585
				490	532
				492	744
				494.8	743.6
				498	743
				500	648.5
				501	423
				504	529
				505.1	532.7
				521.25	674.75
				525	646.5
				526.667	653.333
				526	737
				529.5	637.5
				529	688
				531	501
				531.5	696
				531	701
				533.5	540
				533.5	778
				535	633
				536.2	778.8
				536	538
				538.667	624.667
				540	784
				542	787
				546	549
				548	757
				549	754.5
				556	548.5
				562.667	611.667
				562.5	619.5
				565	548
				572.5	596
				572.25	640
				575.5	588.5
				577.667	585.667
				591	856.5
				620	765
				642.5	972
				644	969
				656.3	557.7
				660.6	544.2
				661.857	576.857
				664.333	574.667
				664	580
				666	621
				668.5	577.5
				675	570
				677	589.5
				680	347.5
				691	467
				698.5	883.5
				721.25	320.75
				722	193
				740.25	268.75
				114.8	505.4
				141.778	506.444
				168.5	502.5
				181	933
				185.667	546.667
				189.5	532.5
				194	648
				196	644
				198	641
				200.5	676.5
				203.5	634.5
				210	629.5
				226	721
				244.5	936
				248.5	919.5
				259	722
				263	958
				268.333	956.333
				270.3	965.8
				273.9	971.9
				278	968
				280	523.5
				298.143	602.571
				304.667	642.667
				305	722
				306.5	725
				309	599
				326.5	970.5
				333	647.5
				335.5	869
				337	990.167
				337.8	870.8
				343	611.5
				342.714	864.429
				342	870.5
				348.5	848
				349.5	872.5
				352	847.75
				351	858
				355.5	847
				360	860
				374	627
				393	631.5
				393	711
				395	629
				396	625
				397	505
				397	709
				401	628.75
				401	624
				411	930.5
				414	580
				424.5	951
				433.5	592.5
				433	628
				433	947
				436	592.5
				442	923
				444	594
				453.5	788
				467.667	573.667
				495	950.333
				498.5	866
				507.25	971
				511	625
				511.889	731.667
				511	741
				514	728
				518	658.5
				522	672.5
				525	658
				529	656
				539	634
				539	995
				540	681
				543	651
				544	849
				549	722.5
				558	930.5
				561	551
				563	919.5
				564	630
				565	985.5
				568	719
				568	908
				570	979
				571	976
				572.833	606.167
				572	665
				574	943.5
				575.5	607.5
				576.375	613.875
				575	969
				575	973
				577.5	589.5
				577.2	618.2
				577	450.5
				577	637
				577.5	943.5
				580.5	618
				580	943
				582.5	912
				582	986
				583	636.5
				584.444	935.778
				584	923
				584	928
				586.2	912.8
				588	698
				590.333	537.333
				592.6	926.8
				593.5	923.5
				594.222	945.889
				595	896
				595	976
				599.667	540.667
				599.667	957
				605.5	963
				606	918
				609	947
				609	968
				611.5	930.5
				613	923
				613.5	933.5
				615	935
				621	557
				621	970
				627.5	542.5
				634	964
				638	930.2
				638.5	966
				643	968
				644	992
				645	579
				649	961
				651	842
				652	982
				656	956
				658	953.5
				663.625	966.375
				663	962
				667	649
				670	975
				676.667	933.667
				678.833	949.833
				681.6	912.2
				682	929
				690.5	905.5
				697.5	427
				696	941.5
				705.5	793.5
				707.714	950.571
				717.5	416.5
				738	140.857
				741	133
				749.571	474.714
				147	877
				220.5	519.5
				242	887
				278	550
				291	553.5
				290.5	556.5
				292.333	559.333
				295.2	548.2
				295.571	560.714
				300	562
				303	749
				345	829
				360	534.5
				381	717
				399	589
				416	744
				418	558
				418	681
				418	742
				421.714	702.571
				438.5	591.5
				441.667	377.667
				461.5	677.5
				465	733
				482	581
				497	570
				498	710
				502	614
				504.5	609
				506	703
				508	712
				520	516
				521	518
				522.143	520.857
				528	743
				543.667	570.5
				543.333	574.333
				543	668
				544	762.5
				551	299
				554	677.5
				558	299
				561	510
				561	692
				564.8	697.8
				565.5	587.5
				565.667	694.667
				569.5	504.5
				569	560
				570.333	696.333
				578	543
				578	689
				579.5	571.5
				580	567
				583	548
				583	723
				583	726
				587	723
				588	559
				590	464
				594.5	554.5
				594	657.5
				598	726
				604.5	611.333
				604.5	464.5
				606	605
				607	715
				610	715
				611	711
				613	710
				624	428
				628.5	693.5
				633.5	688
				635.5	664.5
				635.5	678.5
				647	700
				650.333	568.333
				651.333	571.333
				651	659
				662	941
				667.5	942.5
				668	903
				677.5	936.5
				680	520
				682	602
				685	835
				687.375	868.75
				689.7	860.6
				690.667	538.667
				691.333	855.333
				705	222
				107	644
				107	672
				107	726
				109.5	588
				112	787
				115	841
				115	845
				122	531
				122	634
				123	878.5
				124	851
				125	535
				125	877
				130	545
				130	579.5
				132	766.5
				132	811
				132	889
				134	740
				134	774
				134	816
				135	493.5
				136	764.5
				140	580
				163	812
				165	886
				166	716
				167	757
				168	797
				169	810
				172	666.5
				174	652
				174	873
				176	669
				177	861
				179	864
				180	675
				180	799
				184	875.5
				185	829
				189	628
				191	582
				200	884
				210	760
				211	722
				212	759
				224	474.5
				228	803
				231	789
				244	641
				250	851
				269	920.5
				274	813
				274	909
				275	811
				277	814
				277	956.5
				278	808
				280	807
				283	513
				292	698
				293	523
				294	967
				295.5	519
				295	573
				295	964
				299	530
				299	854
				300	523
				300	533
				301	536
				303	245
				303	538
				306	969
				309	609
				313	965
				315	835
				318	518
				322	516
				322	518
				327	696
				328	597
				328	619
				329	895
				330.333	585.667
				334	597
				335	969
				337	988
				338.667	627.5
				342.333	622
				346	461
				347	613
				348	715
				353.333	613.667
				356	613
				362	614
				368.5	964.5
				368	981
				370	299.5
				376	719
				379	773
				385	780
				392	731
				395	1007
				403	928
				409	1019
				410	434
				411	918
				420	1007.5
				436.5	420.5
				438	1003
				443	1018
				446	637
				448	585
				448	1013
				453	596
				455	587
				455	950.5
				457	546
				463	482
				465.333	552.167
				464	561
				466.333	521.333
				468.5	420
				468	481.5
				469	490.667
				469	442
				469	449.5
				469	457.5
				469	469
				469	471
				470	466.5
				470	499.5
				474	1021
				475	1024
				476	840
				477	836.5
				478.75	506.5
				481	664
				482	666
				490	608
				492	201
				498	653
				505	673
				507	591
				509	590
				509	593.5
				515	668
				517	600
				517	729
				517	1029
				521.333	502
				523	822
				524	654
				528	833.5
				537.8	1024.8
				540.5	989
				541	658
				543	699
				544	542
				548.5	747.5
				550	577
				551	681.5
				552	646
				552	879
				553	950
				559.25	940.25
				561	537
				561	674.5
				561	1009
				562	535
				562	764
				564	766.5
				566	993
				567	672
				569.2	769.4
				572	540
				573.5	629
				574.5	761.5
				576	549
				577	629.333
				577	551.5
				578	174
				579	641
				581	631
				580	643
				580	742
				581	557
				583	622
				583	694
				584	561
				584	620
				586	617
				587	604
				590	629.333
				590.5	692
				595.2	474.5
				595	638.5
				595	643
				601	549
				601	551
				601.5	595.5
				601	964
				603	974
				605.25	591.625
				606.667	516.667
				610	752.5
				612	516
				613	507
				614.5	512
				614	747
				618	950
				621.571	348.286
				621	627
				624	990
				627	613
				628	534.5
				628	985
				629	606
				630	918
				634	603
				636.5	724
				637	702
				638	728.5
				639	716.5
				640	703
				643	573
				644	797.5
				645	795
				647	576
				649	882
				658	575
				659	668
				659	763.5
				660.5	975
				662	959
				669.889	960.667
				673	637
				676	568
				680	677
				687.333	557.667
				687.333	561
				689	550
				690	524
				705	884
				711.4	373.6
				721	910
				124	696
				143	604
				152	737
				162	799
				163	854
				191	822
				267	721
				294	611
				297	796
				313	695
				319	670
				328	995
				361	484
				384	701
				388.5	720.5
				392	966
				405	960
				419	892
				436	638.5
				516	710
				530.667	531.444
				553	617
				556	920
				557	612.5
				566	608.667
				565	726
				571.2	668
				574	669.5
				577	667
				577	960
				579	665
				584.375	600.75
				588.667	607.667
				598.5	594.5
				600.333	591.333
				601	570
				601	939
				615	439
				634.667	677.667
				637.5	161.5
				641.5	680
				657	739
				677.5	865.5
				677	868
				690	763
				704	840
				716	787
				734	599
				77	708
				82	732
				110	773
				128	662
				131	615
				141	544
				142.5	634
				154.333	703.333
				160	704
				159	708
				168	704
				169	697
				170	679.5
				174	732
				175.5	602.5
				175	899
				179.5	781.5
				179	901
				189	868
				192	872
				209.5	432.5
				212	771
				240	786
				247	491
				256	583
				265	666
				266	762
				270	544
				299	822
				305.5	497
				308	871
				318	265
				328	278
				342	195
				351	448.5
				353.5	449.5
				357.833	77.1667
				357.667	480.667
				365	500.5
				370	480
				380.5	188.5
				386	434
				393	741
				394	737
				401	800
				402	184
				414	106
				423	288
				424	260
				433	907
				439	948
				449	254
				455	290
				463	230
				468.875	189
				468	396
				468	695
				481.5	999.5
				491.333	696.333
				492	691
				498	269
				498.5	680.5
				498	686
				499	678
				499	684
				500	686
				532	891
				537	671
				544	550.5
				546	968
				548	301
				548	805
				550	786
				555	601
				567	601
				570	189
				570	909
				575	669
				584	481
				586	591
				589	583
				592	532.5
				595	691
				598.5	687.5
				598	701
				599.5	678.5
				600	684
				602	651.5
				602	676.5
				603	662
				603	664
				603	666
				604.5	543.5
				609	510
				609	700
				614.5	757.5
				616	680
				617	493
				617	894.5
				617	897
				617	915
				617	921
				617	926
				618	900
				624	623
				624.5	1000.5
				635.5	630.5
				636	718
				636	724
				637	713.5
				637	742
				639	753
				642	611
				647	388
				652	555
				657	590
				658	382
				658	578
				660	575
				662	618
				671.429	881.286
				674	374.5
				679.5	508
				684	565
				688.778	826.222
				697	625
				241	378
				242	380
				253	595
				267	321.5
				267	586
				267	644
				295	201
				304	179
				306.5	176.5
				307	174
				313	170
				334	164
				358	146
				358	673
				358.5	745.5
				379.333	847.667
				390	625
				406	135
				408	613.5
				413.5	621
				415	789
				419	785
				422.667	159.333
				429.5	754
				466	502
				466	646
				472	766.5
				475	766
				479	551
				483	753
				496	577
				496.333	584.667
				496.333	587.333
				511.2	608.2
				532	131
				535	753
				538.5	604.667
				538	615
				539.667	597.667
				539	610.5
				542	591.5
				544	587
				545	131
				546	584.5
				551.857	135.571
				552	733
				553	139
				555	734
				556	737
				557	719
				557	740
				559	602
				559	724
				562	606
				562.5	617.5
				564	626
				565.75	622.5
				568	627
				571	630
				574.5	638.5
				578	699
				582.5	651
				588.667	668.833
				590	656
				590.5	664.5
				591	675
				596.5	666
				599	668
				601.222	673
				605.5	677.5
				608	755
				610	680
				610	756
				611	671
				612	758
				613	672
				614	761.667
				617	686.667
				616	698
				617.6	762
				619	697
				619.333	772.333
				622	705.5
				624	689
				623.5	708.5
				627.429	715
				629	722
				629	791
				630.5	777.5
				631	782
				635	664
				635	725
				639	642
				641.5	737
				645	744
				653	721.5
				653	724
				655	663
				655	995
				669	715
				669.75	954.25
				677	712
				684	645
				685	647
				709.333	526.333
				42	736
				96	639
				103	615
				112	695
				113	741
				135	531
				144.8	782.4
				166	712
				168	778
				298	506
				306	482
				382	565
				392	95
				392	101
				393	97
				426	401.5
				428	528
				433	570
				457.5	582
				459	574
				468	503
				475	550
				480	537
				493.889	697.556
				490.5	734
				494	695
				496	700
				497	721
				498	555
				503	722
				504	719
				505	715.5
				505.5	725
				509	910
				516	569
				519	559
				520	677.5
				522	567
				525	742
				527.333	575.667
				527	741
				528	929.5
				531	578
				532	531
				532	535
				533	580
				536.5	582
				536.667	545
				540	554
				542	415
				542	559
				542	585
				544.5	586
				545	441
				547	587
				547	652
				549	420
				550	412
				550	415
				550	587
				551	589
				552	409
				553	403.5
				554	593.5
				554	659
				555.5	397.5
				555	806
				559	745
				560.5	663.5
				560	714
				560	747
				562	369.5
				562	650
				562	655
				562	660
				562	715
				563	365.5
				564	666.5
				564	706
				565	671
				566	507
				568	683
				569.5	349
				569	489.5
				570	486
				570	911
				571.2	682.4
				571.5	687.5
				573	337.2
				573	941
				575	849
				575	937
				578.5	643.5
				579.5	475
				580	641
				581	514.5
				582	418.5
				583	320
				586	297
				586.5	941.5
				588	292
				588	294
				588.667	296.667
				588.5	300
				592.5	342
				595	300.5
				597.5	724
				598	908
				599	783
				599	905
				601.333	677.167
				601	689
				601	783
				603.5	665
				606	668.8
				604	680.5
				607	732.333
				605	683
				609.4	690.2
				611	568.333
				612.571	737.714
				615.5	949.5
				616	733.5
				617	643
				617.667	744.333
				618	641
				618	924
				622	885
				624	634
				627.5	746.5
				631	884
				631	910
				632.667	656.333
				632.333	714.333
				632	726
				632.333	900.667
				633.5	749
				634	941
				635	490
				635.333	686.333
				635	689
				635	752.5
				636.25	682.5
				636	809
				637.333	655.333
				638	661.375
				637	847
				638	929
				640.75	652.5
				643	893
				646	726.5
				650	877
				652	913.714
				651	953.5
				654	598
				654	662
				654.5	723
				654	874.5
				656	680
				656.5	684
				657	586
				657	599
				657.5	686.5
				657	689
				657	721
				658	597
				659	697
				664	719
				666	720
				668.5	576
				672.667	539.333
				672	881
				676	735
				677.833	913.167
				681.5	888
				682	536
				682	812
				686	652
				687.4	939.8
				689.667	538
				689.333	647.667
				691	651
				693	648.5
				696	615
				696	617
				698	592.5
				699	575
				699	655
				700	572
				703	574
				703.667	814.444
				711	854
				714	583
				722	817
				731.5	475
				731	723
				735	475
				735.5	483.5
				738	474
				747.5	378.5
				748	372
				96.2	763.2
				98.5	535.5
				99	766
				106.5	791
				135.111	780.556
				135	783.5
				155.5	495.5
				162.714	477.286
				162.5	471
				164.5	537
				165.667	541.333
				166	603
				168	475
				169.25	479
				172.4	476.8
				176.333	478.667
				181.5	552
				184	452
				188	689
				193.5	549.5
				198	755
				201.667	541.333
				202.444	579.889
				203.75	586
				204	723
				205	596
				212	644
				217.5	594
				221	599
				229	631
				232	686
				236	633
				240.5	634
				243	613
				244	620.5
				245.5	532
				247	610
				253.5	611
				255	590.5
				262.333	754.667
				263	666.5
				264.5	670
				271	687
				272	533
				281	695
				283.333	716.667
				284	607
				285	617
				286	721
				292	233.5
				292	638
				292	870
				299	755
				299.5	761.5
				301	755
				305	784.5
				306.667	787.333
				309	788.5
				309.333	795.333
				336	696
				337	601
				344	468
				362	333
				363	144
				363	435
				364	606
				367	334
				370.333	585.333
				375	807
				386.667	611.333
				388.333	473.667
				389.5	627
				394	541
				401	549.5
				402.667	581.667
				405	414.5
				406.25	552.25
				409.25	417.25
				412	616.5
				414	597.5
				415	144
				416	68
				416.8	665.6
				416	671
				417	649
				419	623
				420.5	565
				423	568
				424	584
				424.5	690
				425	478
				426	688
				427.5	480.5
				428.333	531.333
				428	652
				431.333	636.667
				432	628
				432.667	682.333
				440	699
				442.75	799.75
				446	684
				447	468.5
				449.667	682.667
				451	775
				451.5	777.5
				452.5	783
				453	691
				453	797.5
				455	678
				455.5	729.5
				456	799.5
				459	630
				460	667.5
				461.667	686.333
				463	655
				464.667	658.667
				465	597
				468.667	712.333
				469.5	637.5
				470.25	648.25
				470	656
				472.75	654
				474	650
				477.5	564.5
				482.5	338.5
				483	650
				483	653
				486	470
				488	763
				489.5	473
				491	741
				491.5	761
				493	478.25
				492	645
				492	694
				495.75	689.75
				499	688
				499.667	794.333
				501	689
				502	805
				503	663
				505	760
				509.5	150
				509.625	755
				511	791
				513	738.167
				515	763
				516.5	733.5
				523	742
				524	464
				525	575
				526	471
				526	487
				528	634
				530	636
				532	724.5
				533	638
				533.5	729
				535.6	762.2
				536.333	729.667
				538.5	447.5
				538	244
				539.167	591.333
				540	359
				544	444
				548	828
				550.2	437.6
				552	775
				563.4	177.8
				564	175
				565	195.5
				566	145.5
				577	795
				579	538.5
				583.6	457.2
				591	957
				597.667	738.333
				601.8	555.6
				601	585
				604.143	548.429
				603	904
				604.5	536
				605	907
				608	847
				609.6	614.8
				614.5	566
				616	571.5
				616.5	581
[truncated: 546 more rows]
