# Supplementary material for: Spinal lumbar dI2 interneurons contribute to stability of bipedal stepping
Source: eLife. 2021 Aug 16;10:e62001. doi: 10.7554/eLife.62001 (PMC8448531; doi:10.7554/eLife.62001)
Supplement: Figure 2—source data 1. — The X/Y coordinates of precerebellar neurons (Figure 2E) and dI2 synapses (Figure 2G) at the sciatic level. [file elife-62001-fig2-data1.xlsx]

## Sheet: Sheet1
Pre-cerebellar neurons				dI2 syanapses
Sciatic				Sciatic
x	y			x	y
328.961	432.765			50.5	630.5
453.143	422.25			69	733
588.889	653.437			84	704
594.085	684.83			88	640.5
626.064	693.426			94	584
661.941	570.341			120	792
681.559	638.28			122	790
761.542	722.153			167.2	770
334.468	384.64			180	814
581.615	383.025			190	584
688.835	652.478			294	240
712.806	792.91			300	280
769.262	794.405			398	229
776.545	724.509			430	726
814.044	818.706			449	713
824.373	802.067			478	178.5
495.089	598.131			494.5	773
521.905	704.163			541.5	326
557.04	456.515			561.8	660.6
599.766	581.788			563.2	657.6
655.72	763.08			567.5	662
305.58	373.68			576.5	830
498.164	322.753			594.5	622
529.257	487.06			595	625.75
540.111	580.222			595	641
542.029	399.072			598.778	644.889
580.82	469.475			607.429	611
371.729	378.575			608.5	660
418.329	390.026			633.667	195
414.525	485.725			663	783
450.227	376			671	771
502.273	373.697			680.6	662
518.446	458.598			688	586
564.157	466.135			687	674
569.767	280.442			689.5	628.5
364.976	359.902			701.6	658.4
394.41	345.103			703	635.333
407.103	323.466			704.5	664.5
401.19	514.857			706.5	636
491.5	405.194			706.5	669
562.722	444.382			707.5	653
570.443	544.402			709	628
608.614	521.831			715	647
605.562	740.57			720.429	626.857
617.28	758.493			720	651
704.31	629.286			726.667	637.667
355.237	296.987			727	645
523.755	775.418			733.7	650.4
537.6	478.297			735.333	639.667
588.341	581.22			741.5	640.167
625.767	566.932			741.667	654.333
631.938	590.099			742.5	630.5
425.393	391.446			747	676
601.478	543.13			774	751
660.037	704.148			803.25	873
350.489	357.891			123	853
411.232	374.609			134	623
433.415	885.431			139	865
429.671	388.329			165	704
424.833	355.958			167.5	805
528.396	374.377			168.5	667
620.132	363.478			174	860
406.117	893.593			202.333	752.333
649.77	603.612			212	622
214.967	641.533			229.5	787
340.25	325.865			230.5	429
487.989	560.264			234	318
709.932	740.558			244	599
416.837	669.97			246.286	781.429
448.919	441.777			251.5	860
630.844	653.545			254.667	877.333
647.761	536.97			266.4	651.2
357.983	398.466			279	257
397.403	554.889			293	581
462.436	527.846			298	462
499.71	372.521			304	250
582.859	712.124			327.25	773.75
618.247	647.087			329	889
645.096	701.763			332	559
351.891	371.674			344	489
366.409	390.817			344.333	521.667
397.755	559.495			352.5	770
553.719	536.901			363	232
304.14	532.088			380	867
316.319	328.481			388	328
325.437	300.713			395.5	823
536.374	548.838			396.5	795
535.169	377.386			402	330.5
631.747	719.039			408	795
659.183	614.798			414	266
671.891	692.022			422	296
706.161	702.741			433	819
378.641	451.728			440	671
377.232	363.207			451	698
400.826	378.457			471.2	223.6
336.729	352.458			470	532
359.792	305.653			514	498
376.382	331.368			523	593
519.183	340.275			552	487
553.768	411			562.667	866.667
577.373	793.31			599	279
358.25	490.812			615.8	806.6
460.939	563.677			635	782
470.094	505.719			646.5	779
328.582	331.018			664.333	590.667
348.175	293.794			690	790.5
346.333	260.378			696	732
360.635	359.798			711	770
446.762	480.243			716	770
528.504	303.405			735	746
631.358	770.605			739.857	748.857
639.975	716.836			746	733.5
345.528	376.321			747	750
358.873	344.909			752.333	724.667
551.898	426.576			767.667	771.667
350.859	432.449			769	738
495.488	448.012			776	747
550.564	447.394			793.5	807
567.217	548.735			803.5	821
312.904	299.865			854	881.5
337.849	313.826			21.5	758
474.565	342.71			72	735
478.46	310.698			73.5	615.5
334.324	358.353			73	803
437.959	385.783			84	694
450.455	382.318			120	505
759.932	784.739			133	930
511.671	425.899			183.5	939
617.485	641.873			280	943
398.296	477.778			380.5	931
414.909	388.864			467	927
618.144	765.701			511.429	714.857
320.906	364.943			565	719
440.75	358.039			618.5	720
458.855	341.582			624.2	562.8
516.667	385.644			624.667	559.667
654.253	729.616			629	562
446.353	426.235			638.5	678
462.37	407.986			640	601
495.262	418.357			642	674
619.006	374.51			643	537
442.1	392.117			648.75	607.25
607.25	342.567			657	608.5
647.944	750.796			661.2	653.6
423.754	369.967			664	659
459.02	390.51			665	678
564.581	337.957			665	680.5
305.977	706.151			668.5	654
400.966	387.392			671.143	675.286
456.513	400.667			671.125	656.125
497.471	468.431			674.5	659.25
365.713	355.356			682	641
492.172	413.414			682.5	686
498.736	453.396			687.833	696
551.424	501.88			690.4	685.4
356.095	313.048			692	692.7
543.51	392.627			692	630
636.123	403.2			692.333	702.333
388.73	404.604			693.167	712.333
423.155	385.029			693	684
321.35	306.15			701	694.25
356.818	343			715	711
479.698	393.094			756.5	589.5
477.833	451.167			97.5	804
370.575	344.637			219.5	828
419.981	352.577			248.5	837
423.326	379.217			308	142
441.349	368.674			312	146
539.165	436.576			379	841
540.261	430.217			418.8	598.6
574.363	417.941			446	762.5
470.263	351.842			455	210
491.589	339.393			462	657.5
349.77	305.989			474	677
453.735	382.566			486	646.25
414.348	332.341			494	649
439.634	353.244			494	701
468.457	426.022			497	655
531.1	791.8			505	656
430.485	368.152			518	649.5
486.368	345.605			521	645.5
401.813	366.571			542.8	629
452.235	377.204			553	639
488.877	420.4			560	650.25
683.857	374.81			576.667	672.333
688.537	441.329			581.5	629
665.786	396.786			603.333	640.667
361.103	376.564			609	655
496	393.658			611	313
379.011	363			614	660
395.755	339.717			615.5	671.5
412.833	360.537			623.5	490
506.182	442.773			639	654
496.716	340.955			641	705.5
682.477	357.252			642.667	670.667
378.174	347.435			642	673
391.75	295.375			643.5	662.5
401.473	323.982			646.857	665.571
632.86	479.182			651.4	830.6
662.052	532.6			651	730.5
419.045	331.552			658.5	690
674.213	367.664			665	822
410.769	356.731			666	701
370.69	347.817			666	771
578.357	432.878			670	771
634.832	490.074			677	601
736.595	504.818			678	603
544.037	415.148			679.5	677.5
580.679	432.396			681	737
592.612	506.921			681	766
694.564	345.248			683	683
315.161	250.144			685	668
338.053	282.187			685	743.5
490.337	294.384			686	764
490.735	453.347			687	699
526.608	427.43			689.5	654
537.5	437.519			689	757
698.352	398.664			690	830
302.135	407.892			691.667	630.333
536.8	401.954			695.5	632
561.606	400.03			696	835
571.115	419.404			698.5	840
606.598	410.061			703	790
631.184	389.956			704.75	795.125
718.778	450.156			706.5	641.5
379.43	352.833			707.333	689.667
569.766	530.383			713.889	775.778
577.461	758.211			716.667	772.333
594	754.326			720.5	772.2
536.454	482.804			719.5	778
567.742	372.545			727	778
601.134	511.299			728.667	780.333
687.701	534.53			729.5	718.5
681.252	383.387			729.5	770
706.342	767.778			731.333	683.667
522.415	296.317			731.667	784.333
589.085	387.237			739	846.25
590.409	514.197			756.5	729
643.525	506.887			770	655
655.303	462.902			780.667	655.333
592.767	423.753			780.5	776
600	549.513			792	657
383.268	347.598			792	928
404.961	346.636			793.667	652.333
428.991	338.591			806.5	654.5
545.369	375.892			830	778
637.262	469.492			110.5	884.5
684.81	544.069			301.5	712
733.138	521.575			335	605
446.062	386.567			338	698
578.948	286.078			343	673
660.532	395.742			359.6	959.6
663.192	475.658			361	956
726.97	492.962			403	680
450.5	363.5			407.5	855
564.326	493.86			409	669
609.866	361.17			410	667
646.929	433.226			415	603
724.564	767.729			416.5	605
361.562	345.3			420.5	480.5
609.032	509.726			447	665
443.174	356.14			452.5	666
470.795	397.769			461	663
691.939	453.152			462	651
419.297	339.486			465.5	668
437.582	366.818			470	632
641.907	490.656			472.2	555.4
481.043	473.5			490.778	816.444
676.443	455.455			495.5	606
717.796	485.491			498.667	608.333
515.444	430.111			512	627.75
600.585	453.78			524.5	646
662.603	453.346			531	648.5
458.705	402.152			530	677
488.934	410.738			532.857	613
607.379	493.636			531.5	619
630.561	426.512			535.8	617.6
679.889	522.856			539.25	666
521.526	392.036			539	620
696.784	509.176			539	690
403.797	409.957			546.5	694
544.106	386.213			554.5	686
612.414	510.771			554	705
698.077	494.905			555.667	683.333
302.739	959.066			558.5	679
547.474	375.895			559	692
649.418	463.102			565	699
657.87	487.713			568.5	436.5
686.863	477.904			569	650
				578.5	672
				583	678
				603.5	745
				609	736.5
				611.6	747.8
				615.5	752
				616	817
				623.333	697.667
				625	706
				628.667	701.667
				638	696
				639.5	667
				642	669
				650	676
				657	682
				658	609
				694.5	765
				697	610
				703.333	689.667
				705	609
				723.5	749
				725	558
				726	561
				731.714	552.571
				776.5	776
				777	780
				72	651
				144	502
				156	461
				168	462
				171.75	512.75
				196.5	467
				207.3	838.7
				211.2	642.4
				213.5	355
				214	875
				217	867
				220.333	643.667
				224.5	875
				226	650
				234.333	651.111
				237	868
				238.5	560
				238	873
				246	865
				250	412
				252.5	367
				267.333	685.333
				278.571	674.714
				298.5	641
				301.667	628.333
				328.667	607.333
				337	751
				344.5	504
				344	748.5
				345	873.75
				368.5	872
				370.5	856.5
				376.667	871.667
				378.5	740
				378	869
				417.5	626
				418.5	695.5
				424.5	651
				480.429	662.429
				478.75	784.75
				500	673
				501	679
				506	588
				509.5	684
				521.5	778
				526.5	590
				526	780
				536.5	700
				541	444
				546	656
				552.5	597
				560.2	597.6
				562.5	786
				575.5	730.5
				605.5	589
				611	593
				612.2	595.4
				614	585
				622	604
				628.5	686.5
				632.333	678.333
				637	690.5
				644.5	715.5
				646.5	768
				649	593
				655	773
				660	767
				660	779
				661	775
				671	733
				672	525
				672.5	603.5
				673	392
				675	606
				677.333	380.333
				678.667	666.333
				685.2	730.4
				687.857	541.714
				689.5	496
				692	594
				694.667	530.889
				695.333	512.667
				696.714	606.857
				698.667	515.333
				699.5	511
				699.5	735.5
				702.5	516.5
				704.5	495
				706.5	516.5
				706.5	522.5
				707.5	732.5
				708	498
				708.5	503.5
				709	513
				711	493.5
				712.667	605.333
				716.5	492
				716.667	500.333
				728.333	471.333
				730	492.5
				732	771
				735.5	616
				737	473.75
				742.5	606
				744.5	451.5
				746.5	470.5
				747	625
				750.5	439
				754	439.5
				758	445
				761	697
				762.4	418.8
				762.5	767
				764	440.833
				763.667	457.667
				764.2	843.6
				765.8	688.4
				765	692
				832.5	712
				188.5	530
				195	395.5
				210.222	453.444
				214.5	614.5
				215	850
				217	610
				219.6	847.8
				223	455
				222.5	850
				222.5	575.5
				231.5	456
				239.5	628
				241	520
				246.333	636.167
				248.5	445
				262	718
				266.167	703
				266.5	477
				266.5	651
				268	780.5
				274.222	562.111
				272	659
				285	352.5
				292	653.5
				293	520
				294.5	656
				296.667	659.333
				297.5	725
				297	773
				298.5	354
				298	592
				308	735
				310	269
				313.75	249
				315	279
				317.125	266.125
				323.125	226.125
				323	240.5
				324.5	554.5
				325	631
				326	545.5
				328	635
				345	623
				348.5	617
				349.5	182.5
				354	183
				355	704
				365	478.333
				366	381.5
				365	796
				367	798.5
				368.667	589.667
				371.5	572
				374.429	580.714
				374.333	722.111
				375.5	572
				376.5	382.5
				378	580
				380	386
				379.75	572.75
				382.667	564.333
				382.5	569
				388.667	588.667
				388	865
				393	614
				400	387
				403.5	868
				414	395
				420	550
				422.8	530.4
				425.5	611
				434.333	771.333
				434	777
				435	842.5
				445.5	608.5
				449	834
				451	398
				451	830.5
				459	619
				465	681
				467	663
				470	684
				485.5	642
				486	858
				486.333	861.333
				487	875
				487	894
				488	879
				492.5	647
				499.5	681
				502	655.5
				509	383.5
				517.333	666.333
				520.6	893.2
				527	767
				528	607
				530.667	763.667
				530	768
				531.6	869.2
				537	641
				539.667	688.667
				549	918
				554.2	909.6
				573	791
				576	742.25
				577.333	869.333
				579.5	745.125
				580.5	707.5
				585.5	714
				604.5	642
				611.5	645
				612	668
				616.5	608
				628	668
				629.667	689.667
				629.5	777
				630.5	654.5
				634	654.5
				636.333	696.333
				635.667	786.667
				638	762.5
				640.8	683
				644	687
				644.5	695.5
				646.2	705.6
				651.333	707.333
				653	712
				653	776
				654.667	715.667
				656.5	738.5
				656	777
				657	717
				659	587
				663	702.5
				664	691.5
				666	658
				666.8	698.4
				666	749
				668	704
				672.667	645.667
				674	642
				675	709
				676	642
				677	662
				682.6	771.2
				683	643
				683	652
				685.667	533.333
				686	718
				694	655
				694.667	768.333
				696.5	657.5
				697	661
				698.5	664
				698.5	666
				699	766
				703.5	766
				706.5	764
				708	766.5
				710	645
				711.2	651.6
				720.5	753
				721	764
				722	571
				725.5	310
				725.5	764
				727.556	318.444
				730.333	779.667
				731.5	762
				737.333	658
				736.667	731.667
				743.667	647.333
				758	642
				760	723
				760	771
				766	667.5
				768.5	645
				770.5	642
				773	636
				774.333	664.333
				777	657
				777	687
				778	690.5
				779.5	647
				782	788.5
				787.2	814.6
				795	727
				830	717.5
				835.333	717.5
				21.5	709
				47	752.5
				61	635
				82	645
				101.4	571.4
				134	739
				139.5	892.5
				165.5	848
				198.5	497
				203	452.5
				219.5	730
				227	721
				231.5	551.5
				233.25	718.625
				233	644
				238.333	719.667
				241.5	615
				242.5	699
				243	720
				249.5	743
				251.667	632.667
				253	627
				256	634.25
				256.5	592
				257	528
				266.286	433.429
				288.5	529.5
				291.5	531
				297	358
				301	930
				306	604
				310	594.5
				312	608.5
				317	507
				332	551
				350.5	954
				355.333	544.333
				356	550
				357	547
				360	828
				367.5	590
				374.5	529.5
				378.444	511.778
				376.667	523.667
				378.9	591.8
				378.5	526
				379.5	595
				379	646
				381	504.5
				383.5	453
				386.2	506.6
				386	509.333
				385.5	516
				386	504
				390.5	510
				391	496
				394	474
				396.5	831
				401	469
				403	581
				415	587
				417.5	557
				417	741
				430.833	970.667
				448.667	600.667
				452	601.5
				454.5	674
				455.667	771.667
				461	851
				463.5	553.5
				481.5	605.5
				482.5	608
				487.8	983.4
				488	611
				489	928.667
				488.25	933.25
				488	944
				489	657
				490.5	922
				491.5	917
				494.4	913.6
				501.5	782
				504	623
				509.5	582
				511	567
				513	566
				518.667	564.667
				518	639
				518	653
				519	927.5
				523	656
				524	945
				524	948.5
				529.667	825.111
				532	830
				535	757
				537.5	831
				540.5	759.5
				542	633
				547.5	714
				552.5	636
				559.667	638.667
				560.5	635
				560.5	713.5
				570.5	655.5
				577.5	661
				579.8	608.6
				580	701.5
				581	660
				583.5	610
				587.2	436.6
				593	665
				611.222	633.889
				614	756
				615	639
				620.5	547
				624	903.5
				626.667	674.667
				627.5	670.5
				628.5	647
				637	647.5
				643	877
				653.444	714.667
				656.857	704.857
				656.5	717
				657.5	900
				663	602
				665	899
				664	901
				666	659
				667.222	991.889
				670	718
				672	993.8
				674	991
				678	719.75
				677.5	988
				680	704.5
				682	631.5
				698.667	715.667
				700.2	719.2
				700	637
				701	577
				702.5	700
				703	847.5
				704.5	719.5
				705.5	597
				707	720.5
				708	614.5
				708.333	834.333
				713	667
				713.667	725.333
				715	620.5
				715.556	828.111
				724	707.5
				725.667	723.667
				727	726
				727.5	974
				729	662
				730.333	612.667
				730.5	776
				731.5	711.5
				732.5	637
				734.2	738.6
				737	836
				742.5	715
				742.5	717
				746	710
				765	764
				774.5	638.5
				781.333	511.333
				793	503
				797.167	502.333
				801	502
				31	684
				75.5	612
				95.2	748.4
				106	609.5
				114.5	612
				120	759
				127	680
				142	593
				144.667	623.667
				149.667	619.667
				158	627.5
				160	799
				161.333	577.667
				161	612
				162	628
				172.556	872.333
				173	865
				177	867.5
				177.857	514.714
				184	541.625
				189	484
				189	489
				189	789
				190	482
				191.714	491.857
				192.667	486.667
				193	415
				193.5	556
				195.778	616.556
				194	811
				196	704
				200.556	476.333
				201.5	433.5
				201	494
				206.333	569.333
				208.4	575.2
				209	436
				210.5	484
				217	462
				223	577.5
				225.5	706
				227.714	497.286
				232	693.5
				240	773
				242	697
				249.667	859.333
				262.286	574.286
				263	780
				264	707
				265	657.5
				274	838.5
				275.5	590
				277.5	789
				283	606
				284.667	850.667
				287.2	869.4
				287.333	792.333
				289	753
				295.8	669.6
				298	681
				307	697
				309	607
				319.667	745.333
				331	807
				333.5	765
				345	539
				375	816
				379	806
				388	467
				391	512
				397.5	492
				404	568
				412	515
				412.5	819
				416	486
				416.25	814.75
				417.5	822.5
				423.5	436
				424	611
				430	545
				431	434.5
				431.667	809.667
				431	813.5
				434.5	421
				436.429	799.143
				450.8	814
				452	822.5
				458	412.5
				461.4	812.2
				463	820
				466.5	312
				466.5	618.5
				466.5	822
				467.5	853
				468	813
				472.667	821.333
				475.5	712
				476.714	810.429
				476.5	707
				478	705
				478.333	799.667
				479	621
				480.5	699
				482	574
				484.5	690.5
				485	427
				492	474
				501	643
				503.286	671
				502.875	675
				503	666
				511.167	775
				518	675
				519.111	838.222
				518	873
				527.5	789
				533.333	683.333
				534	659
				535	680
				535.333	579.333
				539.333	642.333
				540.4	686.4
				553.8	773.6
				562.5	676
				566.5	640.5
				571.5	685.5
				574	600.5
				575	693.714
				578	690
				579.667	907.667
				580.857	613.286
				580.333	639.333
				586.143	794.571
				585	612
				594.5	648.5
				596	606
				599.333	651.889
				600.5	694
				601.5	790
				603	699
				605.714	648.429
				608	777
				609	713
				612.5	771
				615.5	620.5
				616	766
				617.5	645
				620.5	600
				621.167	657.167
				624	634.714
				624.5	650
				626	664.25
				628	658.25
				627	770
				629.5	665
				630.5	686
				631.5	634.5
				631	756
				631.333	762.667
				633.833	682.833
				633.5	639.5
				635.667	768.333
				638	667.286
				637.5	677
				639.5	642
				640	765
				643	647.5
				644	652
				646.714	649
				647.5	644
				648	777
				652.5	472.667
				652.5	671
				653.5	690.5
				654	805
				654	851.5
				655	672
				655	718
				655	747.5
				656	577
				656.667	729.333
				657	579
				660	740
				661	576
				662.5	745.75
				663.333	433.333
				665.333	574.833
				665.5	651
				666.5	734
				666.5	736
				667	747
				669.5	569
				670	652
				671.5	745.5
				672	731
				673	380
				683	653
				684	535
				686.429	650
				689.667	723.667
				692.286	654.714
				691	615.5
				691	652
				692.286	888.571
				692	613
				697.333	672.333
				697	675
				698.8	712.8
				698.5	618.5
				702	747
				707.3	580.5
				706.667	759.333
				708.222	766
				707.333	652.333
				711.333	652.333
				713	583
				714	789
				715.833	587.833
				716.5	566
				719	635
				719.75	777
				722	732
				728.5	598
				729.4	653.9
				734	599.333
				739	705
				741.5	706.5
				750	711
				751.25	781.625
				751.5	684
				755.857	703.286
				755.667	784.667
				757	706
				758.333	767.333
				759	710
				760	817
				764	790
				766	733.5
				769.167	636.167
				769	702.667
				771.5	714
				781	710
				783	711
				786.333	533.333
				814	625
				74	829.667
				74	708
				75.5	826
				78.6667	832.333
				81	708
				83	833
				100	822
				102	821
				108	877
				115	621
				121	769.5
				123	775
				139.2	522.6
				141.8	519.4
				163	683
				170	437.5
				178	512.5
				181	693.5
				181.5	736.5
				183.4	599.8
				187	716.25
				187.667	468.667
				190	697.5
				191	511
				191.333	702.333
				191	709
				194.167	487.333
				193	712
				194	570.5
				194.667	696.667
				195.167	708
				196	578.333
				202.5	709
				206.25	723.625
				207	439
				209.333	717.333
				214.5	703
				231.8	580.4
				244.5	581
				246.333	537.333
				250	536
				250.5	570.5
				255	883.5
				259.2	565.6
				258	616
				262	566
				262.5	585
				265.833	503.167
				267	539.5
				267.5	499
				270	541
				274.5	541.5
				281	676.5
				288.5	587
				290.5	541
				293.333	549.667
				299	551
				326.8	585.4
				332.2	580.6
				337.5	566
				340.5	413
				342.5	415.5
				343	910
				347.714	417.429
				347.5	566
				349	568
				351.714	420.429
				360.667	574.667
				387.5	594
				399	652
				405	525.5
				404	618
				426.667	335.556
				428	777.5
				434.5	545
				444	710.2
				446.25	697.375
				446	704.25
				449	777
				450	696
				451	720
				454	682
				459.5	618
				459	811
				464	819
				470.5	783
				474	784
				475.5	731
				476	686
				479.8	665.6
				479.5	700
				481.75	720.375
				487.333	399.333
				489	794
				515	786
				516	736
				520	869
				522	781
				526	890.5
				534.5	780
				543	719
				543	772
				544.5	786
				544	821
				545	655
				546	760
				548	583.286
				548	657
				548	720
				555.75	721
				556	684
				557	682
				559.667	722.667
				568	720
				569	722
				573.5	856
				575	650
				581	595.5
				581.5	356.5
				587	739
				590	597
				618	760.5
				621.5	724
				622.5	880
				631	814
				642	703.5
				642.333	599.333
				644	370
				646.5	367
				648	740
				650.8	311.8
				650.8	692.6
				654	398
				655.5	545.875
				654	809
				655.333	693.333
				656.833	574.167
				659	692.5
				663.2	691.6
				667	618.25
				670.25	538.875
				676.5	694
				684	667.25
				687.5	646
				691.5	723
				691	760
				696.333	413.333
				698	757
				701	723
				700	759
				701	726
				713.333	720.333
				717	765.5
				723.5	654.5
				722.5	712.5
				726.889	694.222
				726	716
				728	654
				730	643.5
				734.2	720.2
				737	684
				740.2	685.6
				740	631
				745.429	644.714
				747.5	620.5
				748	706.5
				762.6	711.8
				767.8	706.6
				768	735
				778.5	660.5
				783.4	663.7
				786	732
				817.8	768
				818.2	774.6
				56.3333	660.667
				73	599
				78	817
				82.125	599.875
				84	814.75
				124.75	546.25
				125.5	792
				128.667	544.667
				137	525
				142.1	528.3
				142.167	625
				145	626
				149.7	532.3
				158	537
				164.5	627
				173	756
				173	763
				180	829
				185.5	826
				186.667	830.667
				200	724
				202	462
				214	861
				224	280
				228.5	596.5
				242.5	744.5
				246	728
				249.2	264
				250.286	693.714
				252	618
				253.25	781
				253.667	262.667
				261	348
				261	883
				262	752
				263.5	429
				265	883.833
				275	354.5
				286.5	753
				288.5	356
				298.5	753
				301.5	762.5
				303	523.5
				306	766
				307.625	774.75
				307.5	528.5
				307.5	577
				309	366
				312	572
				314.6	773.2
				316	561
				317.8	514.4
				319	524.5
				320	564
				325	436
				331.5	750.5
				337.5	589
				341.333	683.333
				345.5	435
				354.8	532.4
				357	580
				357.5	599
				359	663
				361	598
				364.714	518
				371	802
				374.5	563
				378	597
				378	694
				379	691
				380.333	860.333
				404.667	542.667
				404.5	601
				404.333	702.333
				408	594.5
				412.5	931
				415.167	623.833
				415.5	429
				415.5	594
				419.8	619.4
				419.333	827.333
				421.6	614.6
				423.5	593.5
				424.333	571.333
				429.667	664.667
				430.667	652.667
				436.8	583.4
				440.333	627.333
				443	609.5
				443.8	627.4
				444.5	803.5
				451.5	612.5
				453	655
				456.667	817.667
				462	830.5
				462.333	723.667
				464.5	805
				465.5	532.5
				467.667	552.667
				469	557
				470	554
				478.2	782.6
				478.5	558
				482	780.5
				482	609
				484.667	327.333
				489.5	777
				490	941
				492	777
				493	756
				498.5	764
				500	711
				500.75	772.25
				501.667	509.667
				501	515
				503	714
				505.5	589
				506.5	770
				511	591
				515.5	764
				517.667	609.667
				532.333	745.333
				533	751
				536.333	604.333
				537	785
				540	640.333
				539	768
				542.5	513
				555	766
				558	696
				562.333	695.333
				565.5	923.5
				566	737
				568.5	651.5
				571	678.5
				574	679
				574	697
				574.333	803.333
				581.5	695
				582.667	681.667
				583	666
				584.5	801
				585	601
				586.2	738.4
				585.667	876.333
				589	732.5
				590	799
				595	665
				595	722
				596	683.5
				597.8	686.2
				597	726
				598.5	720
				600	706.5
				601.5	784
				607.5	911.5
				607.875	916.875
				608	701
				612.714	705.571
				614	790
				617	777
				619.25	666.5
				619.2	781.6
				620	678
				622	565
				622.5	763
				626.5	719
				626.8	787.4
				626.5	790
				628.5	784
				633	793
				634.8	462.2
				638.5	720.1
				639.7	728.7
				641.5	512
				645	781.5
				646	689
				649	496
				653.833	721.667
				652	752
				653	346.5
				653.5	754
				659	722
				661.5	794
				662	601
				663	642
				666.667	641.667
				668	794
				670	691
				675.5	791
				682	636
				682.667	767.333
				685.5	636
				686.5	546
				691.5	707.5
				691	744
				693.667	598.667
				693	746
				694.333	585.333
				695.5	700
				695.8	767.6
				696.5	746
				697	682
				698	254
				698.5	763
				701.5	715.5
				702.333	572.333
				703.5	559
				706.5	664
				707	767
				708	666
				710.8	599.4
				713	593
				714	632.75
				714	587.5
				714	600
				715	582
				715.5	602
				715	609
				715	769
				717	611
				718	757.25
				718.5	768
				721	633
				722	605
				724	760
				725.333	590.333
				734.5	646
				739	507
				745	667
				747.5	597
				752	669.5
				756	674
				760	495.5
				761.667	662.667
				763	495
				765	676.5
				771.5	636
				781.6	640
				788.714	626
				794.5	619
				800	752
				809	659
				110.5	598
				165	563.5
				174	748
				198	827.5
				202.5	764
				294	549
				493	624
				506	583
				531.5	597
				552.5	408
				559.5	360
				566.5	363
				569.2	723.4
				577	400
				586	741
				586	744
				587	468
				593	532
				601	519
				638	689
				651.333	702.667
				658.333	669.667
				661.714	671.143
				667	673.4
				668	676
				672.889	676.778
				707.667	744.333
				720	679
				721	705
				722.8	707.2
				721	753.5
				722	677
				724	712
				725	696
				726.2	718.4
				726	710.5
				728.5	725
				731	719
				791.5	880
				808	897
				836.333	894.667
				837	807
				35	669
				115	795
				152.5	533
				152	824
				159.5	803.5
				159	536
				167	733
				168	794.5
				173.5	829
				182	753
				193	558
				216.667	498.333
				239	707
				241.2	841.4
				243	568
				245	658
				248	661
				251.5	833
				258	662
				261	667.75
				264	660
				263.5	663
				263.5	755
				263.5	824
				265.333	575.333
				267	667.857
				267	762.714
				268.667	547.333
				273.333	502.333
				280	633
				281	777
				281	781
				293	787.75
				293.5	642
				296.5	618.5
				300.5	613.5
				307.333	655.667
				317.778	602.778
				328.5	750
				329.5	651
				344.167	597.833
				344.8	732.6
				346	792
				349.889	559.667
				350.667	566.5
				358.429	593.714
				364	410
				370.5	593
				374	576.25
				382	555.75
				383.5	552.5
				383.5	785
				386	845
				395.9	652.8
				396	658.5
				396	833
				400	463
				403	551
				408.667	597.333
				426.2	306.6
				436.5	779
				438	716
				440	746
				441.2	828.4
				444	828
				448	771
				454	746
				457.5	670
				464.833	765.333
				470	752
				477.5	677
				491	866.5
				500	860
				501.5	587.5
				502.286	788.429
				503	582
				504	580
				504	695
				508	497.25
				512.5	806
				513.5	655
				514	564
				516.5	716
				518	640.5
				519.5	608
				521.875	603.125
				521	654
				521	745
				523	606
				528.5	816
				529	640
				533.333	542.667
				533.5	650
				540.5	581
				548.667	557.333
				552.25	638
				554	543
				556.5	705
				559	654
				559	704
				561	544.75
				561	643.714
				561.167	658.167
				561.5	516
				562	639
				569	773
				570.5	643
				572.857	726.143
				571.667	862.667
				576.5	583
				576.8	768.2
				593	679
				601.5	719
				605	664.5
				605	719.75
				607	597
				608	650
				611	584.5
				616.5	606
				617	711
				619.667	609.667
				620.5	819
				626	702.857
				626	717
				632.8	704
				639.8	718.6
				645	690.5
				648	756
				649	637
				653	677
				657	775
				658	791
				659.5	785
				660.5	709
				663.333	548.667
				670	810
				671.5	589
				671	828
				671.667	834
				673	679.5
				674	736.25
				673.667	838.333
				675.5	760
				677	856
				678.5	687
				679	591
				680.667	606.222
				679	709
				681	595
				682.5	765
				686.667	607.111
				687	698.5
				687.667	709.667
				689.2	602.4
				689	773
				692.6	711.1
				691.833	607
				691	706.5
				702	770
				703.5	733
				704	715
				705.333	771.667
				709.5	649
				710	551
				710	733
				712	540
				716.5	588
				718	734
				718.5	777
				720	546
				721.8	777.6
				724	550
				725.333	530.333
				728.5	329
				728	556.5
				734	647.5
				738	781
				742	710
				742.5	759
				745	724
				748.5	783.5
				753.25	756.625
				751.5	787.5
				761	657.75
				761	441
				762	730
				768.889	741.111
				768.5	746
				769	583
				774	461.25
				787.5	745
				789.333	742.333
				804.714	631.429
				850.75	807
				103.5	587
				117	572
				123	527
				132.333	627.667
				133.5	782
				137.667	608.333
				148	717
				154.111	714.778
				181	605.75
				191	724
				197	395.7
				196.5	743.5
				198.5	674
				198.5	677
				203	396
				204	400
				208	397.667
				213.333	399.667
				213.5	402.5
				215	768.5
				215	811
				216.333	773.667
				217.5	777.2
				216	816.5
				217	403
				217.5	645
				218	822
				220.333	505.667
				220.667	796.667
				222	779.571
				224.286	826.429
				225.5	781
				227	650
				230.5	373
				232	796
				234.5	386
				235	388
				235	648
				240	572
				256	524
				262	500
				263	472
				263.571	609.286
				266.5	472
				266.5	611.5
				266.5	712.5
				268	609
				267.5	721
				267.667	843.333
				268.8	547.6
				273.5	610.5
				278	733
				283	612
				287	638
				290.333	632.333
				291	304.5
				291	681
				299.5	434
				300.5	644
				305	696.8
				305	444.5
				304.333	644.667
				307.5	643
				308	699
				309	701
				312.222	445.556
				312.333	478.667
				314.333	576.667
				315	361
				315.75	682.75
				328	683.5
				329	629
				331.286	633.286
				332	662
				333.5	630.5
				336	629
				337.5	637.5
				337	654
				341.1	434.1
				341.833	636.833
				343.5	641.333
				343	652
				348	640
				351.5	630
				352.8	507.6
				354.333	593.667
				359	439
				360	387
				361	520.5
				361.667	643.333
				364	437.111
				363.5	740
				364.8	643.6
				364	718
				370.5	438
				372	415
				373	516
				373.5	804
				374	802
				377	408.5
				377	446.5
				379.286	797.143
				381.2	837.6
				382	403.5
				385	796
				396	517
				400	663.5
				400.5	519.5
				401	638
				404.286	664.571
				407.667	639.333
				413.5	673.5
				415.333	411.667
				415	534
				417	695
				424	631
				423.5	639
				426	555.5
				428.7	635.8
				428.5	560
				428.5	644
				432.556	633.556
				433.5	642.5
				434.2	679.4
				439.25	646
				440	797.5
				443	789
				444	640
				449.5	645.5
				451.5	535
				451	562
				453.2	645.4
				456	574
				457	863
				460	702.833
				460	495
				460.5	682
				463.5	704.5
				467.667	560.667
				470	589
				471.5	642
				476.333	503.667
				480.5	826
				482	672
				484.333	825.667
				490	826.778
				489	494
				491	672
				493	581
				495.25	742.625
				494.5	731
				495	825.75
				500.8	499.4
				506.667	731.333
				506.667	758.667
				509.833	683.833
				509	730
				512.5	502
				514	455
				515.333	653.667
				516	726
				519.167	655.167
				520.5	796
				523.5	453
				533	793.25
				541	335
				545.429	336.714
				547	790
				549	539
				549.5	798.5
				555	792
				555	796
				556	513
				557	681
				560.5	793
				567.5	746.5
				570	767
				572	793
				579.25	350.25
				578.5	836
				580	695.75
				581	791
				583.889	761.333
				586.5	790.5
				591.8	672.4
				592	772
				594.5	669
				596.333	540.667
				596.8	700.6
				599.5	782.833
				604.5	676.5
				612	630
				617.667	636.333
				619	629.5
				622	686
				624.5	725
				629.5	774
				636	778
				637	570.5
				639.5	735.5
				640.333	725.667
				641.5	728
				643	698
				643.5	700
				646.667	696.222
				649	668.75
				648.667	688.667
				650.8	598.6
				651.5	728
				651	742
				653	673.5
				658.375	794.625
				658.4	370.4
				659.333	601.667
				661.8	705.6
				661.8	728.6
				662	761
				663	759
				664.333	740.667
				670.4	690.2
				671	474
				671.5	693.5
				674	735
				673	760.5
				683	735
				685	595
				685.5	688.5
				686.5	712
				687.125	731.875
				689	690.5
				695	719.5
				697.5	598
				702	904
				703.667	678.333
				705.5	620
				706	623
				707	609
				707	625
				709.8	706.6
				712	790
				713	647
				713.5	677
				717	657
				718	711
				719.667	662.333
				723.5	701.5
				725	565
				730	764
				732.5	777
				746.5	599.5
				752	593.5
				756	515.333
				755	612
				756	688
				760	635
				765	465
				774.9	651.1
				783	689.5
				786.333	772.333
				798	927
				799	923
				799.5	933.5
				805.111	884.222
				807.5	608
				809.5	883
				845	786
				32.5	808
				45.4	739.4
				44.5	763
				47	762.5
				63.5	722
				69.5	774
				87	576
				105	878
				118	510
				124	568
				125	892
				129.667	654.667
				130	669
				130	924
				139	675.5
				146	829
				153	877
				169	476
				187.5	594
				190	474
				192	879
				204	334
				207.625	325.5
				208	892
				215	308.5
				216	306
				217	303.5
				218	301
				220	296
				220	417
				221.5	441
				221	887
				222	291.5
				226	281.5
				229	923
				232.5	276
				234.333	271.333
[truncated: 2,738 more rows]
