# Supplementary material for: Spinal lumbar dI2 interneurons contribute to stability of bipedal stepping
Source: eLife. 2021 Aug 16;10:e62001. doi: 10.7554/eLife.62001 (PMC8448531; doi:10.7554/eLife.62001)
Supplement: Figure 3—figure supplement 1—source data 1. — The number of axons expressing GFP or/and cherry at the superior peduncle (Figure 3—figure supplement 1D). [file elife-62001-fig3-figsupp1-data1.xlsx]

## Sheet: Sheet1
	GFP	Cherry				ControlA	ControlB	dI2 A	dI2 B	dI2 C			Controls	dI2
ControlA	29	20	0.689655			0.689655	0.666667	0.0833333	0.0714286	0.05			0.580342	0.0547551
	44	22	0.5			0.5	0.52381	0.0185185	0.0789474	0.0416667			0.462431	0.0574476
	40	25	0.625			0.625	0.5	0.0294118	0.0212766	0.047619				0.0381093
	41	21	0.512195			0.512195	0.4	0.0869565	0.025974	0.0263158
	61	35	0.57377			0.57377	0.666667	0.0555556	0.0333333	0.0285714
	36	24	0.666667			0.666667	0.384615		0.0235294	0.0344828
	34	24	0.705882			0.705882	0.25		0.0681818
	46	17	0.369565			0.369565	0.307692		0.0909091
									0.103448
ControlB	15	10	0.666667										All VSCT	dI2 INs			dI2 VSCT axons	Non-dI2 VSCT axons			dI2 VSCT axons	Non-dI2 VSCT axons
	21	11	0.52381		Avg:	0.580342	0.462431	0.0547551	0.0574476	0.0381093		Avg:	0.521387	0.050104		Ratio	9.60976	90.3902			9.61	90.39
	18	9	0.5		Std:	0.10766	0.144753	0.0276031	0.0298878	0.00901562		Std:	0.0589553	0.00855248
	25	10	0.4
	21	14	0.666667
	26	10	0.384615
	24	6	0.25
	26	8	0.307692
dI2 A	12	1	0.0833333
	54	1	0.0185185
	34	1	0.0294118
	23	2	0.0869565
	18	1	0.0555556
dI2 B	42	3	0.0714286
	38	3	0.0789474
	47	1	0.0212766
	77	2	0.025974
	90	3	0.0333333
	85	2	0.0235294
	44	3	0.0681818
	33	3	0.0909091
	29	3	0.103448
dI2 C	20	1	0.05
	24	1	0.0416667
	21	1	0.047619
	38	1	0.0263158
	35	1	0.0285714
	29	1	0.0344828
