# Supplementary material for: Spinal lumbar dI2 interneurons contribute to stability of bipedal stepping
Source: eLife. 2021 Aug 16;10:e62001. doi: 10.7554/eLife.62001 (PMC8448531; doi:10.7554/eLife.62001)
Supplement: Figure 4—figure supplement 1—source data 1. — The volume of GFP+/syn+ and GFP+/syn- dI2 synapses on premotor neurons (Figure 4—figure supplement 1C). [file elife-62001-fig4-figsupp1-data1.xlsx]

## Sheet: Sheet1
presynaptic terminal volume
GFP+/ASV30+	GFP+/ASV30-
1.19	0.61			Summary
0.98	1.05
2.19	1.97				ASV+	ASV-
1.88	0.64			Average	3.81	1.42
1.17	1.98			STD	2.84106	1.277
3.49	0.62			N	121	23
2.53	1.75
4.11	0.96
2.25	0.962065			Ttest	p=3.0E-5
1.73	0.385778
2	0.419462
2.006	0.646631
2.006	1.74826
2.006	1.07403
2.006	0.355466
2.006	0.51
2.84	1.75
2.84	0.6
2.84	1.17
1.61	3.92
2.35	5.8
2.4	3.08
2.4	0.75
2.4
3.715
3.715
0.91
1.75
1.38
1.08
0.69
1.01
1.01
3.86
3.86
2.01
2.01
3.065
3.065
0.61
2.685
2.685
0.48
0.48
1.4
0.95
2.42
2.11
1.58
2.08
2.08
3.14
3.14
4.79
2.7
4.425
4.425
2.195
2.195
3.185
3.185
3.2
0.17
4.83
4.83
1.84
1.84
1.84
6.95
6.95
6.95
6.95
8.54
5.42
9.21
1.17
3.19
4.61
1.57
12.13
4.8
2.07
7.29
2
8.7875
8.7875
8.7875
8.7875
3.74
2.1
3.38
5.94
8.615
8.615
1.48
8.34667
8.34667
8.34667
3.38
6.6375
6.6375
6.6375
6.6375
0.39
11.16
5.96
5.96
8.55
8.55
8.4
0.67
0.68
1.31
1.26
0.69
0.95
9.755
9.755
7.32
7.32
0.69
