# Supplementary material for: Spinal lumbar dI2 interneurons contribute to stability of bipedal stepping
Source: eLife. 2021 Aug 16;10:e62001. doi: 10.7554/eLife.62001 (PMC8448531; doi:10.7554/eLife.62001)
Supplement: Figure 4—figure supplement 2—source data 1. — The X/Y coordinates of dI1 synapses at the sciatic level (Figure 4—figure supplement 2C). [file elife-62001-fig4-figsupp2-data1.xlsx]

## Sheet: Sheet1
dI1 synaspes
Sciatic
x	y
357.331	885.09
343.308	472.06
343.511	534.093
369.043	438.149
373.5	411.621
376.891	499.25
400.513	462.09
434.697	478.485
437.836	440.618
474.066	705.981
490.728	461.26
575.145	504.011
570.122	705.305
588.995	828.092
634.899	512.278
649.3	502.2
659.243	517.054
676.724	492.121
711.94	752.597
273.281	499.062
276.047	487.541
303.265	539.175
491.562	866.347
527.729	481.26
568.947	637.796
309.864	536.869
326.701	440.657
330.718	460.129
364.151	448.458
369.171	520.793
374.706	426.912
397	454.539
414.776	404.898
521.619	340.729
646.891	676.238
325.291	398.952
331.644	500.781
340.891	324.219
346.134	413.031
341.08	384.518
353.064	440.55
357.76	354.605
366.143	441.643
390.07	402.889
431.596	333.332
453.747	364.203
485.085	503.367
499.852	490.593
520.154	496.704
541.548	443.793
535.467	348.576
238.605	524.349
305.625	404.422
324.673	458.541
336.494	497.299
364.361	429.253
360.44	368.8
381.636	446.652
416.205	410.601
405.7	355.2
429.049	433.957
447.459	388.541
456.243	482.674
453.885	456.18
471.889	321.058
477.585	378.069
490.237	456.966
526.75	738.875
598.875	833.253
633.971	797.294
700.083	540.167
432.901	728.073
448.402	626.123
532.942	667.143
559.813	682.33
604.023	683.535
630.638	668.133
646.333	779.412
696.289	593.604
750.14	736.458
301.634	511.662
317.732	454.134
356.291	412.618
365.76	365.45
399.942	419.105
580.471	382.312
750.866	518.634
340.743	457.569
413.419	711.059
441.254	585.032
486.923	693.974
506.275	671.89
525.418	627.949
573.409	610.187
586.918	749.036
608.139	791.2
135.991	855.582
272.862	563.031
322.743	582.714
347.94	500.418
354.841	536.776
371.782	445.405
385.75	461.536
411.636	457.636
437.839	410.232
455.531	468.612
536.963	603.753
557.121	489.868
608.619	839.952
638.528	544.833
358.446	282.783
360.871	227.208
360.246	453.249
362.3	499.3
398.575	482.865
407.987	438.709
408.115	572.449
421.726	469.137
461.536	517.531
490.012	564.538
525.392	501.431
563.659	528.341
617.206	563.556
684.765	610.67
705.326	619.442
298.4	537.821
340.181	550.133
401.107	508.093
496.622	520.715
522.762	294.265
648.225	388.195
660.48	713.607
367.293	654.402
364.032	483.102
384.071	292.692
419.977	526.493
423.902	451.768
483.589	497.73
517.236	412.316
507.597	217.208
545.45	388.21
586.473	508.039
600.962	441.854
624.963	523.645
666.592	502.818
666.279	587.515
702.138	382.166
291.757	473.92
298.073	801.922
308.36	425.708
323.967	445.967
330.852	409.136
333.217	460.425
338.677	600.6
345.451	427.373
359.975	376.52
353.911	583.429
364.686	449.15
378.963	344.561
403.801	382.271
402.93	477.33
438.352	633.698
437.415	533.463
451.024	342.071
470.702	311.5
462.489	601.596
484.69	753.21
475.56	500.468
561.631	828.828
553.934	348.541
737.306	464.278
217.635	870.01
296.195	271.702
341.795	432
391.949	481.658
430.003	837.515
450.854	499.69
479.887	681.049
492.915	564.034
583.811	527.454
634.079	541.769
630.884	508.13
294.041	859.427
324.516	527.5
350.637	452.837
395.402	463.687
374.818	541.57
382.116	433.793
391.366	523.663
455.278	508.994
480.689	528.851
529.315	462.97
532.711	521.158
615.837	597.362
657.763	540.59
667.233	570.605
267.735	529.304
304.409	514.462
326.612	451.587
372.613	477.913
375.642	452.675
422.922	470.072
503.342	427.452
650.174	674.692
750.968	671.553
311.404	444.66
426.992	548.53
541.767	491.713
160.901	836.521
338.247	421.662
437.984	428.16
482.212	623.152
587.449	857.256
248.657	603.759
341.211	634.111
396.246	537.683
446.748	581.67
483.446	619.072
519.95	758.535
546.679	610.393
269.944	558.34
318.961	503.954
332.672	463.176
375.162	485.585
487.547	713.8
547.078	492.535
636.355	523.516
272.31	506.238
353.571	460.135
375.585	425.508
390.103	373.719
393.17	227.35
417.629	423.731
419.96	467.56
428.5	484.215
437.207	460.183
451.603	422.069
509.029	607.098
516.062	243.864
536.278	477.593
551.789	476.421
553.057	489.571
569.194	837.572
566.593	470.746
626.319	497.532
635.897	797.535
301.955	512.955
344.857	515.158
358.737	544.877
431.988	448.648
459.639	547.701
456	730.194
288.014	607.127
312.458	530.229
352.766	491.635
393.245	423.402
378.886	536.023
472.083	551.786
526.169	767.974
570.259	386.569
584.798	573.785
83.0211	873.071
177.726	698.321
240.52	502.378
257.23	572.025
292.319	415.818
298.724	492.238
344.215	773.827
330.837	419.113
324.393	392
376.013	393.397
374.313	269.443
376.4	424.083
398.857	459.214
405.098	502.913
405.356	574.644
474.984	461.991
520.946	900.65
539.334	360.737
566.968	342.053
622.365	597.05
625.869	809.636
645.137	609.882
666.248	320.168
715.813	509.735
778.229	636.971
331.784	485.32
427.297	500.719
475.989	532.184
452.829	473.683
532.81	559.329
568.602	554.33
628.127	773.554
379.993	489.315
436.172	630.843
452.193	509.517
484.223	493.053
634.28	520.55
666.235	504.059
694.161	472.624
331.879	470.394
340.482	503.319
338.612	433.543
357.86	448.947
383.424	385.31
386.512	442.119
402.148	405.967
421.806	397.597
424.025	422.85
451.115	596
463.682	470.268
463.958	620.311
510.268	492.155
511.382	444.182
619.175	720.787
652.94	758.47
653.558	581.467
673.946	509.731
282.626	663.244
315.098	367.036
330.728	468.252
352.434	488.074
347.754	410.602
390.065	416.877
390.956	367.994
377.808	435.096
395.802	451.728
403.657	394.429
431.01	393.897
470.133	513.933
525.227	531.943
546.963	469.578
622.355	455.695
653.946	440.183
416.79	545.304
451.977	706.608
461.74	370.62
523.672	635.468
635.955	712.236
321.066	796.538
317.83	485.43
342.804	526.324
381.331	716.112
518.842	562.917
518.2	677.382
602.375	463.578
671.028	560.056
717.207	784.034
356.986	488.451
369.756	513.523
391.576	458.818
421.053	519.611
483.128	740.444
519.276	716.29
553.697	670.51
576.914	527.026
622.029	874.369
722.685	619.25
298.708	477.18
359.719	315.057
410.615	620.653
409.405	428.675
417.766	316.734
436.058	452.366
434.296	531.102
440.188	497.071
481.312	749.273
475.088	419.659
523.231	685.25
631.778	735.353
663.637	573.113
766.638	623
347.208	508.5
369.682	502.692
513.25	564.753
548.501	606.542
595.86	538.267
623.316	629.557
655.69	618.714
317.557	418.869
331.18	294.29
365.85	451.043
419.687	430.091
422.816	460.866
437.347	503.558
459.147	366.691
456.402	247.159
471.429	469.388
479.034	525.644
484.274	663.521
488.701	407.486
510.308	504.9
535.413	569.661
547.087	367.457
554.711	489.474
569.945	448.745
575.056	596.056
589.817	867.973
591.381	587.548
593.58	832.203
599.934	738.912
612.514	685.978
622.619	575.96
636.22	847.171
653.534	823.101
647.71	718.355
667.484	841.935
707.024	476.241
716.564	572.203
239.887	858.005
301.367	555.133
310.717	635.132
341.582	502.143
384.704	552.722
406.716	770.165
442.807	436.067
465.317	564.545
523.868	337.884
527.245	656.304
718.779	732.583
242.288	544.827
242.097	459.806
268.757	490.848
320.67	433.989
326.08	420.747
368.596	427.561
356.605	380.884
370.282	461.068
380.165	375.979
436.824	349.793
549.943	839.24
569.872	600.98
652.763	480.661
726.821	490.846
317.773	499.236
324.447	432.277
362.927	521.573
368.909	458.253
373.63	528.62
407.826	452.339
421.926	405.772
441.826	493.845
480.579	509.594
492.309	456.75
579.69	526.804
583.143	250.329
642.047	790.241
707.915	539.34
708.057	603.807
323.721	517.65
371.448	486.91
388.699	457.949
433.471	503.052
469.734	514.459
535.011	468.94
554.694	538.226
597.855	623
611.381	551.452
637.008	444.81
679.223	576.083
717.017	615.254
736.04	762.101
380.421	482.662
396.028	611.065
422.608	784.257
448.511	539.642
640.957	431.722
643.569	548.662
276.612	539.384
283.98	486.23
320.703	460.672
340.741	358.024
364.705	492.635
389.688	390.977
394.603	508.938
438.599	454.316
470.312	295.288
492.331	519.281
510.64	619.365
522.121	533.459
523.402	281.427
546.249	555.239
728.232	679.775
730.966	533.373
267.935	525.045
338.604	571.827
371.596	483.096
390.804	445.677
432.783	402.544
416.931	867.317
449.454	324.342
488.954	561.954
537.208	295.72
230.224	622.034
242.817	579.852
290.769	550.701
324.284	341.693
352.823	463.293
359.886	514.609
384.7	286.38
415.341	735.244
465.298	788.133
480.69	566.217
506.702	438.784
523.596	755.085
534.433	689.904
549.155	769.555
576.289	421.785
336.063	570.808
365.131	517.245
385.883	861.767
402.765	628.329
424.962	738.049
454.626	783.561
470.957	728.406
494	524.784
521.576	819.864
526.58	666.49
532.277	809.553
586.223	399.468
629.023	484.035
672.569	705.137
333.516	516.317
349.331	489.081
386.347	444.357
432.881	432.493
427.596	468.223
427.963	510.633
503.185	487.677
518.256	529.457
526.434	738.359
522.92	478.07
416.528	556.772
457.05	300.204
591.414	429.62
645.418	506.236
378.018	458.826
395.127	497.215
390.403	531.392
413.495	615.767
423.863	382.816
459.639	540.523
496.409	572.466
488.04	299.06
492.641	683.051
518.781	230.117
604.343	306
279.034	618.252
322.688	460.312
327.833	674.292
361.39	606.983
373.173	491.719
382.743	573.126
439.626	677.551
463.256	735.184
543.808	537.997
591.696	854.978
667.023	578.879
381.13	506.34
416.214	518.572
469.386	536.529
439.793	464.122
513.775	487.494
529.449	576.898
572.627	572.447
584.802	536.917
634.272	593.188
663.119	606.54
787.231	665.154
305.323	582.125
349.298	720.176
427.126	476.527
440.145	573.922
509.698	813.015
189.045	895.182
277.709	608.796
350.534	496.761
362.315	469.705
364.8	551.483
389.817	515.085
411.143	431.078
424.045	783.409
432.9	789.733
485.821	520.284
608.798	507.183
639.028	476.694
184.532	831.62
322.601	512.038
356.953	470.04
364.927	661.268
371.437	714.08
388.714	465.308
384.795	440.452
395.475	647.446
407.974	434.984
412.339	480.702
436.901	662.93
447.398	732.381
514.439	349.531
517.997	488.01
519.385	267.415
569.299	447.337
557.587	266.826
585.041	811.669
590.149	537.214
599.288	362.328
628.145	548.661
666.189	647.811
760.454	696.706
293.492	833.343
314.8	488.178
384.955	472.034
390.681	538.126
398.351	443.727
414.594	413.344
454.895	456.613
454.33	394.189
502.26	464.275
521.869	538.005
511.856	665.322
691.926	560.162
281.919	553.029
312.964	508.693
309.187	525.159
337.766	530.394
401.765	531.017
427.278	484.264
452.125	468.298
493.593	743.515
503.857	380.698
281.282	557.846
305.696	485.866
323.824	454.059
360.751	361.458
370.675	565.193
405.89	504.528
429.774	396.289
413.42	542.164
424.791	447.886
431.537	548.627
457.635	494.282
537.415	566.666
601.313	806.346
