# Supplementary material for: Spinal lumbar dI2 interneurons contribute to stability of bipedal stepping
Source: eLife. 2021 Aug 16;10:e62001. doi: 10.7554/eLife.62001 (PMC8448531; doi:10.7554/eLife.62001)
Supplement: Figure 4—figure supplement 3—source data 1. — The ventral/dorsal location and the large/small somata of dI2 neurons that are contacted by DRG terminals (Figure 4—figure supplement 3E,F). [file elife-62001-fig4-figsupp3-data1.xlsx]

## Sheet: גיליון1
Size		Location
Large	Smalll	Dorsal	Ventral	contacts						Large ventral	Large Dorsal	Small Ventral	Small Dorsal			Large	Small		Ventral	Dorsal
1		1		49						1	49	2	20			1	2		1	49
	1	1		20						2	40	0	12			2	0		2	40
	1	1		12						3	23	2	6			3	2		3	23
1		1		40						7	31	4	7			7	4		7	31
1			1	1						2		7	17			2	7		2	20
1			1	2						0		3	16			0	3		0	12
1			1	3						7		9	8			7	9		7	6
1			1	7						2		1	12			2	1		2	7
1			1	2						3		0	12			3	0		3	17
	1	1		6						1		1	14			1	1		1	16
	1	1		7						1		2	16			1	2		1	8
	1	1		17						2		1	10			2	1		2	12
	1		1	2						3		7	6			3	7		3	12
1			1	0									9			49	20		2	14
	1		1	0									14			40	12		0	16
	1		1	2												23	6		2	10
	1	1		16												31	7		4	6
																	17		7	9
1			1	7													16		3	14
	1		1	4					Avg	2.61538	35.75	3	11.9333				8		9
	1		1	7					std	2.05832	9.73075	2.8011	4.12257				12		1
1			1	2													12		0
	1		1	3													14		1
	1		1	9													16		2
	1		1	1													10		1
	1		1	0													6		7
1			1	3													9
	1	1		8													14
1			1	1
	1	1		12
1			1	1											avg	10.4118	7.78571		2.80769	16.9474
1			1	2											std	14.9354	5.70937		2.46544	11.2973
	1		1	1
	1		1	2											median	3	7		2	14
	1	1		12
	1	1		14
1			1	3
1		1	1	23
1		1		31
	1	1		16
	1	1		10
	1		1	1
	1	1		6
	1	1		9
	1	1		14
	1		1	7
