# Supplementary material for: Spinal lumbar dI2 interneurons contribute to stability of bipedal stepping
Source: eLife. 2021 Aug 16;10:e62001. doi: 10.7554/eLife.62001 (PMC8448531; doi:10.7554/eLife.62001)
Supplement: Figure 4—figure supplement 3—source data 2. — The X/Y coordinates of dI1 synapses and 5HT terminals at the crural level (Figure 4—figure supplement 3G,H). [file elife-62001-fig4-figsupp3-data2.xlsx]

## Sheet: Sheet1
dI1 synapses			5HT terminals
Crural			Crural
x	y		x	y
127	696		54	602
130	699		54	606
135.5	745		61	588.5
137.5	648		64.1429	647.714
137	820		63	669
144.25	626.75		65.3333	652.667
144	609		65.5	655
145.5	637		65.125	672.25
147	627		66.8	658.8
149	625		73.5	683
151	623		76	648
152	526		85.5	716.5
154	805		86.25	736.25
157	668		87	546
158	807		96	733
160.2	810.4		100	592.5
161	802		111	519
164	805		123.333	510.667
166.5	671		124	636
167	716		124.375	808.375
169	714		124	812
170.5	578.5		127	482
171	715.5		134	486
174.5	581		140.667	508.333
174	684		141	478
174	732		141	505
174.5	803		142	541
175.5	579		145	504
178	584		149	500
179.25	666.75		152	491.5
179.5	673		152	867
180	630		153	539
180	650		154	498.5
181.5	697		158	480
181.667	720.333		158	486
184.429	673.429		159	460
185.833	837.167		159	503
186	758		159	516
187.333	664.667		159	561
187	672		161	527.5
188	655		161.5	580.5
188.5	668		168	489
188	724		170	438
188.333	762.667		170.5	492
190.571	729.857		172	494
189.667	883.667		172	559
194.333	434.333		175	568
195	715		183	513
195	769		187	491.333
196	410		187.333	463.667
196	721		188	470
201	709.5		190.667	891.333
204.833	701.667		193.5	551
204.333	568.333		193	555
205.5	571.5		194	517
206	653		196	862.5
208	851.5		198	625
209.5	572		200	560
210	670		201.8	697.4
210.286	861.571		206	616
210.5	847		207	462
212.2	754.4		207	668
212	799		208	580
212.5	845		213.556	627
213.6	718.8		212.833	608
215	523		213	420
214	572		213	605
215.5	632.5		213	614
216	801.5		214.667	418.333
218.5	626		214.5	431.5
218	691		214	680.5
218.75	848.75		215.5	684
220	690		216	440.5
221.889	513.333		216	449
221.5	809		217.5	620.5
222	674		217.333	626.667
223	753		218	608
224	743		218	652
228.2	521.4		219	696.5
227.333	536.667		220	693
228.2	683.6		220	898
228.5	534		221	442
228	815		221	610
229.5	719		221	663
229	858		223.2	612.4
230.5	500		223	489
230.5	540		223	630
231.5	646		224	506
232	277		224	671
232	599		224	878
232	684		226	695
233	523		227.667	650.333
233.667	546.333		227	673
233.5	871		228	607
234	496		228.5	878
235	739		229	626
235	829		230.333	611.667
236.25	282		230	673
236	819.5		231	626
237	492		233	397.5
237	817		233	616
238	583		234	619
239.667	581.333		235.5	606
240.5	613.5		235.5	610
240	216		235	623
241	790		235.5	656
243.5	708		236	652.5
244	558		237.5	396
244.5	565		237	618
245	691.5		238	496
246	269		238	654
246	867		239	259
247	732		239.5	675
251.4	627.4		240	437
250	884		240	536
251	572		240.25	657
252	673		241.4	660
252.5	750		241	440
252	836		241	722
253.5	623		244	403
253	856		244	496
258	441.5		245	613
257.5	843.5		246.5	489
258	312		248.429	616
258	825		247	286
258	840		247	626
260	655		248	428
261.5	752		248	673.5
262	511		249.5	442.5
263.333	625.333		249.75	612
264	517		251.333	898.833
264	534.5		251	514
264	560		252.5	611
264.5	779		252.5	617
267	526		253	517
270.833	303.833		253	872
269	445		254	655.5
270.25	809.75		254	870
269	848		254	898
270.5	609		255.5	613
272.5	548		255	902
273	579.5		257	197.333
274.167	812.667		256	622
274	575.5		258	408
275	826		258	458
276	457		258	613
276.8	574.7		259.5	193
276	624		259	476
277	609		260	472
279	160		260	871
279	539.5		261	618
279.5	579		261	898
279	815.5		262	647
280.5	164.5		263	353
281	190		263	409
281	553		263.5	503
282	788.5		263	543
283	540		264	885
283	552		265	888
283	628		265	906
284.667	479.333		267	870
285	567.75		267.667	887
284	581		268.333	866.667
284	626		268	901
285.167	765.667		268	905
285.5	167.5		269	511
289.25	172.25		270	291
288.833	467.833		270	545
288	620		272.2	599
290.5	375.5		272	775.5
289	820		273	546
290.5	463		275	546
290	647		278	788
291.5	175		278	903
291.5	185.5		279.5	513.5
291	595.5		279	541
291	630		281	516
291	663.5		282	453
293	721		283.5	186.5
294	581		288	416
294	633.5		288	488
294	637		288	510.5
295.333	741.667		289	385
296.857	465.286		290	447
296	916		291	361
296	921		294	498
297.6	598		298.5	180
299	469.5		298	603
299	580		301.9	390.4
300	564		302	287
301.5	676		304.5	626.5
301	749		309.5	754
302	193		314.857	474.286
302	207.5		317	457
302	475		318	703
303.333	796.667		319	420
304	668		329.3	464.7
305	807.714		329	906
304	816		329	908
306.5	585		331	704
306	595		332	288
307	466.5		334	285
307	628.5		334	693
307	819		340.25	149.875
308	479.5		346	469
308	839.5		348	919
310	565		365.75	205.375
310	569.5		366	209
310	625		369.333	922
310	806.5		370	436
311	174		370	919
311.333	585.667		373	393
312	614.5		373.333	619
312	816.5		374	622
313.5	589.5		375	139
315.286	255.571		375.714	633.143
315.5	572.833		377.5	624.5
314.667	581.667		383.375	927.875
314	839		392.5	362.5
314	871		401	123
315	584.5		402.5	100
315	650		402	178
315.333	686.667		406	199
315.333	704.667		423	190
315	837		425	192
315.5	866		427	197
316	699		428.667	799.333
316	880.5		428.5	803
317	540		430	805.5
317	631		432.5	244.5
318.5	529		433.167	810.167
318	646.5		432	947
318.667	761.333		438.5	169.5
319.5	578.5		441.5	166.5
319.333	834.667		446	127
320.333	346.667		449	150
320	575		451	122
320	608		451	154
320.5	613		451.5	467
320.6	765.4		452	119
320	887		454	961
321	616		457	960.5
321	851		458	167
323	324		459	65
323	629.5		459	130
322.833	886.167		459.5	169.5
323.667	516.333		459	591
323.5	609		460	233
323	712		461	206
324.5	403		461.5	209
325.286	444.429		461.5	588.5
324	606		463	591
325	202		468	280
325	210		469	171
325	600		470	242
326.2	841.8		474	633.5
326	436		476.5	244
326.5	442		484.4	787.2
327	601		485	374
327	837		486	784
330	446.5		488.5	762.5
330	641		491	943
330.5	839		493	157
332	446.5		494	123
334	253		497	144
333	643		502	117
333	649		505	64
333	835		505.5	76.5
334	445		507.5	114.5
334	824		509	46
336.333	603		509	75
336	652		510	112
338.167	340.167		510.667	935.333
337	583		511	117
338	534.5		513	122
338	564		514	128
338.5	655		514	950
338.5	809		518	35.25
339.5	206		520	935
339	493		525.833	28.3333
339.5	836		531	28
340.4	232.8		532	113
341	204		534	121
341	846		556	199
342	542		559	183
343.5	517		560.143	387.429
343.833	560.833		567.5	360.5
343	753		571.5	363.5
343	807		573	515
344	634		579	152
344	703		616.5	658
346.75	529		618.5	973.8
346.5	574		624.667	378.333
346.5	669		626.5	832.5
347	562		628.5	997
347	637		634	96
348.625	801.625		641.2	452.4
347	923		644.5	220
349.25	224.75		646	236.5
348.333	516.667		649	235
348	662.5		651	52
349.5	564		651	209
349.8	657		653	220
349	678.5		655	228.857
350.667	640.333		654	172
350	651		654	225
351.5	647		655	220
351	661		656	173
351	828		657	215
353	417		657	231.5
354	455		658.5	168.5
353.5	522.5		659.5	170.5
353.5	775		659	178
353.833	781.5		660.714	74.8571
354.5	561.5		660	379.5
354.75	707.75		662	96
354	777		662	309
355	532.5		662.667	393.167
355.5	535.5		665	470
355	749		666	288
356	835.5		666	325
357	338		667	328
357	647		667	439
358	675		668	560
358	829		670	132
359.4	834.4		674.7	79.7
359	875		676	76.3333
360	245		675	319
360	591		676	83.5
360	624		678.5	81
360	635		678.5	83.5
360.8	647.6		678	110
361.4	689		682	83
360.5	830		683	355
361.333	532.667		683	380
361.8	536.6		684	376.5
361	550		685	91
363	412		685	112
363	530		687.5	71.5
363	575		688	97
363	616.5		689	681.5
364	190.5		690	87.5
364	517		701	67
364	545		701	70
364	643		714	185
364	867		719.333	929.333
364	872		731.5	142.5
365	441		737	213.5
365	574		737	442
365	610		33	687
366.5	621		34	676
365	625		34	690.5
365	656		35.3333	679.333
366	527		36.6667	718
366	532		36	683
367.2	553.6		36	701
366	643.5		37	705
367.5	386.5		38	709
367	609		81	582
367	626		81.6667	780.667
367	655		83	727
367	852		84	798
368	172		85	677
368	502		87	776
369.167	520.167		92	803
368	647		93	769.5
369	210		95	768
370.2	550.8		95	789
370	737		95	808
370	277		97	773
371.2	394.6		102	694
370	547		103	791
370.5	610		105.125	808.125
370.333	790.333		105	621
371.5	510.5		109	521
371	728		116	682
371.5	805		117	803
372	686		119	614
373	231.5		119	685
373	375		120	505
373.8	837.6		122	525
374	499		122	687
375	557.167		124	525
374	681		125	510
375	542		125.5	563
376.25	649		127	504
375	791.5		129	535
376.5	252		130	525
376.5	563		131	546
376	588.5		134.5	483
376	658		135	640
376.5	691		137.667	511.333
377	230		137	583
377.333	255.333		139	804
377.5	516		140	581
377.5	547		141	668
377.75	840.25		144	553.5
378	187		145.667	825.333
378.5	443.5		146	552
378	492		146	628
378	789.5		149.5	521
378.5	815		151.75	712.25
378.25	824.25		152	483
378.5	829.5		152	496
379.5	162		152	520
379	357		156	481
379	638		156	494
379.667	654.667		158	626
379	817		162	496.5
380	225		163	549
380.5	550.75		165.5	497.5
380	614		164	676
380.556	649.556		165	734
380	805		167	446
381	189		168.5	434
382.25	199.5		170	524
381	287		172	849
381	494		175	502
381.667	496.333		176	488
381.5	809.5		177	897
381	820		178	820
382	702		180	697
382	826		182	465
383	149		184	725
383	516		185	846
383	556		187	453
384.2	612.8		188	490
383.5	646		189	453
383	819		189	612
383	858		189	778
384	452		189	874
384.5	546		190	687
384.667	679		194	634.5
384	784		194	685.5
385	195		194	698
386	538.5		195.333	662.667
386.5	786.5		195.5	668
387	245		196	633
387	488		196	825
387	523		197	833
387.4	647.8		198.333	481
387	807		198	708
389.167	518.5		198	778
388	757		199	491
389	197		199	517
389	404.5		199	698
389.5	407.5		199	769.5
389	445		200.5	675.5
389	571		201	679
389.5	785		201	742
391.571	228.714		202	493
391	266		203.4	676.2
391.333	386.333		204	732
391.5	441		206	619
391.667	538.333		206	648
392.667	471.333		206	655
392.667	562.333		206.5	688
392	566		207	661
392	729		207	664
392	788		208.4	677.6
393	384		207	691
393	524		208	633
393	556		209	584
393	604		209	650.5
394.333	216.667		210	904.667
394	467.5		210	630
394	577		211.5	639
395	385.5		210	647
395	598		210.714	686.143
396.667	693.333		211	672
396	704.5		211.333	692
397	550		212.333	634.333
397.5	570.5		212	663.5
398.667	649.333		212	682
399.5	616		213	705.5
399	695		212	731
400	622		213	626
400	644		214.778	667.111
400	861		213.5	685.5
401	624		214	670
402	412		214	695
402.8	476.6		214	731
402.5	593		214	807
403.5	734		217.625	673.875
404.5	362		216	671
404	616		217	706
405.333	499.333		218	731.125
405	618		219	671
406.5	387		220	678
406.667	487.167		220	607
407	490		220	665
407.5	536		220.875	684.875
408	378		220.857	739
411.333	484.333		220	742
409	500		221	667.5
409	518		221	732
410	382		223	743.5
410.5	502.5		223	810
410	804.5		224	813
411	599		225	688
412	164		226	733
412	560		226	771
412	687		227.5	920
412	838		228	760
413.333	316.333		230	608
413	428.5		231	671
413	441		233	493
413.6	704.8		233.5	646.5
413.5	782		233	690
413	844		234	613
414	382.5		234.5	623.5
414.5	765		235	720
415	144.5		235.5	841
415	338		236.5	615.5
416.8	500.4		237	762
416	708		238	789
416.5	880		239.333	618.667
417.5	634		241.111	752.111
417	710		242	625.5
418.5	739		242	760
417	839		242	883
418.667	654.333		244	324
418.5	753		244	756
419	565		245	371
419.5	587		245	748
420.333	242.667		246	726
420.75	313		246	761
421.333	504.222		246.5	784.5
421	582.75		246	797
420.667	592.667		246	826
421.8	169.4		247	749
421.5	374.5		248	754
421	671		249	739
422.5	733		249	741
422.5	760		249	779
424.25	491		251	726.333
423	567		250.6	751.4
423.5	625.5		250	890.5
423	638		251.333	729.333
423.5	675.5		251	755
423	823		252	615
425.5	186		253	787
426	377.5		254	692
426	478		255	535
426	506		255	645
428.5	191.5		255	751
428	507		255.5	762
428.5	583		256	390.5
428.5	607		256	728
428.5	739		256	765
429.25	378.75		258	694
429.667	445.667		257	782
429	614		257	908
430	209		259.5	622
432.5	207.333		259	743
432.2	608.4		259	761
431.556	647		260	741
432	179		260	779
432.333	598.667		261.875	424.75
433	629.75		262	654
432	735		262	661
433.5	258		262	727.5
433	344		262	743
433.333	659.667		263	624
433.5	835.5		263	713
434.429	443.286		264	728
434.25	640		264	731
434.5	698.5		265	678
435	361.5		266	838
435.5	455		267	570
435	572		268	668
435	647.5		268	750
435.5	673		271	410.125
435.5	682		269	685
435	745		269.5	772
435	762		270	675
436	660		270.5	725.5
436	703		271.5	757.25
436	718		270.333	813.667
437.5	208		272.5	419.2
437	400		272	737
437	679		273	685
437	720		273	741
439.571	257		274	693
439	389		274	761.5
440.5	248		275	690
440	586		275	776
440.667	749.333		276	633
441	425		276	660
442	358		276	694
443.2	432.4		276.8	789
442	817		278	648
444.4	436.6		277	662
444.5	584.5		278	743
443.333	819.667		279	633
446.5	467.8		280	669
446	544		280	822
447	247		281.667	796.333
447	578		281	851
447	595		282	684
447	881		282	811
448	368		284	183
448	436		285	732
448.5	540		286	648
448.5	551.667		286	652
449	346		286	783
449	677		287	807
449.5	691		288	651
450	582		288	812
451.5	588		290.667	132.333
451.667	592.333		290	618
451	700		292	182
453	347.5		291	795
453	415		294	723
454	577.5		294.5	787.5
455	250		295	662
455.5	335		297	811
455	760		299	635
456.5	804		300	798
457	402		301	141
458	766		301	168
461	401		301	190
461.667	489.333		301	671
463	577		301	793
464	238		302	655
464.4	582.2		303	148
465	295		303	795
465.5	572.5		304	748
466	214		304	912
466.5	348		305	741
466	491		305	746
467.5	646.5		305	885
468.5	595		306	678
468.5	835		306	752
469.5	385.5		308	140
470.667	438.333		309.222	758.222
469.667	580.667		310	752.5
470	737.5		311	739
471	390		312	190
473	248		317	169
474.5	384		319	655
474	386		322	559
474	657		322	824
475.333	293.667		324.5	691.5
475	391		324	721
476	558		326	638
476	242		326	671
476	468		326	863
476	602		329	624
476.5	662.5		329	673
476	749		330.5	82.75
477	303		330.8	600.6
477	463		330	864
477	747		331	608
478	680		332	712
479.5	192		333	99
480.571	691.714		333	720.5
480.333	537.667		334	199
481.286	650.571		335.25	733
480.667	668		337	600
480	687		337	702
480	750		338	736
481	599		339	733
482	547		342.5	90
482	670.5		348	196
482	684		348.667	722.667
484	552.2		348	747
483	599		350	183
483	603		351	196
484	320		352	988
484	726		352	630
485.5	494		354.25	267
485.333	619.333		353.5	828
485.5	773.5		359.833	647.167
486	283.5		359	748
486.5	687		359	815
486	725		360.667	256.667
486	761		360	619.5
487	289		361	643.25
487	499		361	874
488	280		362	675
488	528		362	783
488	653		362.6	869.8
489.667	499.333		363	86
489.5	666		365	627
490	794		366.7	637.3
491	517		367	61
491	654		368	619
491	775		368	730
492	289		370	653.5
493.25	381.75		371.5	667
492	532.5		370	744
492.5	746		371.5	628
493.5	196.5		372.5	637.5
493	515		372.5	1015.5
493	715		373.333	119.667
494.5	503.5		373	437
494	535		373.714	448.429
494	609		373.667	644.667
494.4	668.6		374	661
497.2	348.4		377.4	497.2
496.5	372		377.5	127.5
496.5	550		378	674
497.5	194.5		378.5	726.5
497	618		378	742
497.75	657.25		379	649.5
498.5	326.5		381.5	665
498	398.5		381	679
498.5	645.5		382	507.5
498	671		383.333	670.667
499	577		384	506
500.4	743.2		384.333	626.667
500.5	285		384	684
500.5	354		385.5	533.5
500	493.5		387.667	149.111
500	564		386.5	537.5
501	596.25		387	648
500.667	600.333		387	673
501.5	509.5		387	686
501	622.5		388	535
502	580		389	672
503	623		390.5	119
504	309		390	641
505	448		390	865
505	623		391	212
505	783		392	280
506	494		393.125	489.875
507.4	614.8		392	663
508.9	789		392	667
507	262		394.778	534.333
508	368		393	688
508.8	583.6		393	720
508	624		397	665
509	618.5		397	794
510.5	581		400	663
510	622		400	675
510	823		403	677
511.667	490.333		409	691
511.5	579		413	696
513.2	300.4		416	782
513.25	446.75		422	73
512	695		423	848
515.75	561.125		424	768
514	347		425	759
515	614		427	470
514	632		427	679
514	686		429.667	881.667
516.167	483		447	1029
515	754		449.5	1029
517	327.333		449	1034
516.5	480		454	1035
517	511		455	652
517	711		458	686
518	214		458	741
519	330		461	266
519	622.5		461	741.5
520.8	333.4		463.2	225.4
520	573.5		464	741
520.5	668		467	874
521	197.5		468.4	805.2
521.75	327.25		469	735
521	683		472.167	731.833
522	624		472	751
522	628		473	688
522	790		476	736
523	330		478	819.5
523	541		488	787
523	605		492	790
523.667	618.333		505	454
523	756		510.5	793.5
524.5	431		512	705
524.5	522		521	445
524	569		523	1025.4
525	180		522	780
525.2	264.4		536.833	645.167
526.714	547		536.667	587
527	266		537	841
527	344		544.5	765.5
527	590		547	760
529.333	596.167		549	768.667
527	751		555	782
528	432		560.8	325.4
529	424		564	732
530	275		566.333	172.833
530	579		566	176
531.5	187.5		568.778	157.222
532.333	279.833		588.5	1021.5
531.333	614.667		590.5	945
531	668		592	947
532	295		600.875	372.125
532	372		614.5	388
532	675.5		621	44
533	671.5		627	194
534	323		632.5	1028
534	601		637	156.5
538	256.625		642	56
536.333	272.667		644	55
537	545		645	528
537.5	458		645	46
538	519		647.5	52
539	838.5		648.5	45.5
539.5	269		649	60
539.5	533		651	62
539	602		653.375	56.5
540.5	261.5		654.7	537.1
540.5	290		656.25	87.25
540	327		656	85
541	560		658.5	79
542.714	616.714		659	61
542	637		660.5	559.5
544	652.625		662.25	85.5
543.4	413.2		663.7	100
543	427		663	82
543.667	523.667		663	108
544	332		665	81
544	602		666	83
544	656		667.5	87
545.333	339.667		670.833	46.6667
545	411		669	105
545	502		671.556	111.444
545	510		670	500
546.714	535.429		672	100
545	604		672	108
545	635		676.5	44.7
545.833	663.833		677	83
546	265.5		677	104.5
546	270		679.25	121.75
546.5	327		679.8	84.8
546	500		679	106
546	610		680	116
547	352		681.5	109.5
547	433.5		683	118.5
549	252.5		682	47.5
548	506		682	75
548	606		682	88
549	325		685.5	48.3333
549	504		684.5	87
549	512		684	98
550	354		685	74
551	602		686	61
551	656		686	119
551	518		687	729
551	641		688.5	60
552	371.5		688	65
552	393.5		688	74
552	498		688	99
552.5	623.5		689	86
552	701		689	88
553	350		690.333	104.667
554.25	460.25		690.9	118.1
554	512.5		692.4	58.8
553	521		692.5	75.5
553	541.5		692	102.5
553	606		694	80
554	501		696.625	101.5
555	347		694	118
555	394		695	109
555	508		697	130.5
556.8	543.9		698	62
555.5	626.5		699.778	80.2222
556	366		698	108
557	316		700	85
557	400		700	97
558.111	499.333		700	107
557	547		700	112
557	647		701.429	131
558.333	263.167		702	126.5
558.333	602.667		702.5	76.75
561.6	301.4		702.6	100.8
560.5	567		702	106
560.8	582.2		704	86
561	520		704	95
561	547		704.5	111.5
561.333	577.667		705	129.333
561	604		704	144
561.857	668.571		705	74.5
561	673		705	79.5
561	820		705	89
562.5	392		706	107
562	586		707	72
562	619		707.333	76
562.25	647.25		708	94.4
562	711		707	105
563.667	415.333		708	80
563	592		708	98
564	209		708	385
564	589		709	102.5
565.5	291		711	95.5
566.167	393.167		712.8	75.6
565	542.5		713	85.3333
565	611		714	88.5
565	811.5		714	102
566	383		714	116
566.5	549		715	77
567	206		715	122
568	480.833		716	133
568	496.5		717.5	773.5
568	818		716	777
570.2	328.4		717	122
569.5	596		718	138
569	620		719.8	260.6
569	676		722	104
570	180		723	107
570	201		724	110
570	529.5		724	112
571	288		726.625	98.125
571	332		726.5	107
571	443		728	96
572	284		728	105
572	342.5		736	192
572.5	635.5		78.75	716
575.667	584.333		100.5	699
575	814		101	710
576	311		102	658
576	535		108.4	741.4
577.167	622.167		113.2	622.2
576	760		117	624
577	265		128.5	620
577	619		130	581.25
580.667	531.444		129	781
579	251		131	798
579	269		134	819
579	772		136	817.5
580	761		138	812
581	629		140	669
584.25	317.25		140	745
583.6	770.6		145.5	689
583.5	290.5		150	725
584	544		154	688
584.5	763		168	514
585.333	265.333		169.5	462.5
585	585		169	696
585	855		170	688
587.5	324		170	743
587	525		172	643
588.5	594		174.333	618.667
589.667	523.333		176	671.5
589.5	552		180	674
589	555		182	452
592.4	326.3		183	586.5
590	607		185.333	670.333
590.667	787.333		191	442.5
591.8	549.6		192	792
591	561		192	797
591	700		195	432.571
592.5	521.5		194	573
592	703		195	439
594.429	297.429		197.8	439.6
594.5	701		199.5	433
594	179.5		199.5	764.5
594	471		200	598
594	500		202	493
594	673		203	445
594	678		206.333	420.667
594	732.5		207	440
595	567		208.5	734.5
595	569		211	693
596.75	211		211	734
596	663.5		211	752
597	295		212	677
597.625	328.25		213	425.5
597	506		215.5	764.5
597.8	570.6		217	802
597.5	745		218.25	672
597	807		218	736
598	279		220	568
598	519		221.2	677
598	573		220	753
599.5	251		222	870
599	324		223	777
600	648.667		225	867
599	680		226	597.5
599	749		227	680
600.5	227.5		228	705
600.8	280.6		228	821
600	455		230	594
601	597		231	632
602.5	604.75		231	682.5
602.333	331.667		232	677
602	607		234.5	488.5
603	236		234	623
603	334		235	761
603	446.5		236	740
603	592.5		236.667	759
603.8	708.6		237	647
604	576		239	675.6
604	650		238	732
605.75	297.25		239	578
605	400		239	663
605.333	459.667		240	582
605.667	501		241.8	597
606	343		240	633.5
606	611.5		240	647
606	700		240	718
606	770.5		241	469
607	295		242.2	538.5
607.667	474		241	599
607.333	606.333		242	723
609	494		241	828
609	527		242	688
609	582		242	718
609.8	627		243.5	514
609.5	636		243	635
610	519		243	637
611.286	522.143		244	471
611	186.5		244	706
611	502		244.5	712
611	516		244.5	776
611	584		244	808
611	601		245	632
613	206		245	715
612	302		245	719
614.25	578.125		246.75	725.125
614	195		245	817
614.667	217.667		245	823
614.5	255		246.5	468
614.5	516.833		246.5	484
614	611		246	575
614	843		246.667	578.333
615	186		246	596
615.333	291.333		246.5	601
616.5	474.5		246.25	634.5
616.833	567.167		246	820
616.8	754.8		247	709
617.75	457.75		248	703
620.125	230.125		248	715
618.667	473.333		248	731
618	617.5		248.667	828
618	674		248	834
619.75	465.25		249.667	933.111
620	461		249.5	510
620	620		249	539
620	656		249.667	578.667
621	751.5		249	711
621	477		249	751
621.667	571.333		250	609
622	368		250	621.5
622	622		250	706
622	700		250.5	721.5
623	272		250.5	727
623	662		251.375	551.625
623	676		251	710
624	387		251	715
624.667	588.667		251	781
624.5	621		252	692
625.5	749		252	724.5
626	579		252	867
626	598.5		253.5	458
626	618		253	663
626	681		254.7	862.7
627.333	388.667		254	577
627.8	592		254.5	680
627	595		254	703
628	675		254	717
629	327		254	720
629	575		254	815
629	670		255	648
630.5	201		255	666
630	325		257	463.333
630	452		256	747
630	458		256	754
630.5	580		256.75	815
631	269		256.333	821
631	312		257	531
631	802		257	745
632	375		257	925
633.5	313		258	580
633	315.5		258	614
635	298		258.5	651
634	544		258	686
634.8	588.7		261.9	680.4
635	193		260.167	762.667
635.5	325		260	756
635.5	463		261	628
638	215		261	743
638	260		261	772
638	271		262	626
638	305		263	610
638	393		264	576
639	339		264	620
639	396		265.5	729
640	226		265	801
640.667	523.667		266.4	683.4
640	612		267	657
642	502.333		267	771
641	549		267	799
642	572.5		268	561
642	589		269.286	686.286
642	611		269	718
643	522.5		269	783
644	492		270	678
645.444	482		271	635
645	619		271	696
646	198.5		271	820
646	213.5		271	831
646	493		272	647
646	622.5		273	696.5
648.2	489		274	608
647	535		275	724
648	342		276	720
648.333	412		276.75	728
648	486		277	599
648	497		277	812
648	548		278.5	594.5
648	626		278	694
648	688		279	692
649.333	444.333		280.5	689
649.333	545.667		280.5	775
649	693		281	621
651	462.667		282	637.857
651	552		281	790
652	317		281	802
653	763		281	826
654.4	463.2		282	671
654	568		282	793
655	411		282	824
655	546		283	629.5
656.5	326		283	718
656.5	621		283	785
657.5	499		283	820
657.333	591.667		284	616.5
658	751.25		284	818
658.667	363.333		285	650
658	480		285.5	708
658	782		286	465
660	625		286.333	699.667
661.5	242		286	703.5
661	632.5		286	775
662	496		287	617
663	374		287.5	755
663	520		288	684
663.5	827		288.25	696.75
664	549.5		288.333	712
664.5	661.5		288	717
664.4	693.2		288	720.5
666	839		288.5	725
667	575		288	763
668	550		289	701
668.333	632.667		290.111	801.889
671	384		290.667	776.667
671	623		290	814.5
672	725.5		291	696
674	714		291	783
674	750		291	828
677.714	627.429		292.333	682.167
677	631		292.5	771.5
678	538		292.667	810
679	411		293	643
679.5	509.5		293	676.5
681.429	479.714		293	698
682.667	509.333		293	736
683.5	405		293	740
683	499		293	765
683	507		293	806
684.5	285		294	534
684	293		294	612
684	548.5		294	745
684.833	666.833		295	576
685	410		295.5	578
686	477		295	623
686	598		295	772
687.429	672		296	613
688	414		296	695
689.167	418.333		296	770
688.5	435.5		297	745
688	485		297	806
688.333	592.667		298	778
689	512		298	782
689	599		299.286	803
690.4	500.8		299	567
690	519		300.5	731.333
690	728.5		300	685
691	481.5		300	817
691.5	557.5		301.75	698.5
692	307		302	567
693.875	419.875		302.5	592
694	280		302.5	680.5
694	304		303.667	802.667
694	562		304	739
694	643		307	748
694	768		307	751
695.5	445.5		309.667	529.667
696.5	435		310	700.429
696	438		309	743
696	494		309	817
696	608		311	639
697	299.5		311.4	813.6
697	617		312	696
697	621		312.5	743
698	762		313	547
700	607		313	663
701.5	442		313	682
701	627.5		313	686
702.333	670.667		315	681.5
702	740		316.5	754
702	750		318.5	468.5
704	250		317	644
703.5	585.5		318	675
704	810		318	752
705	267		318	760
706.375	421.875		319	602
705.5	560		319	711
705	693		319.5	754
706	374		320	670
706	483		320	758
706.5	635		320.667	809.333
706	746		323	658
707.5	278		323.5	760.5
707	675		323	783
709	250		323	785
709.667	556.333		324	738
709	642.5		324	802
709	695.5		324	820
710	560		325	757
711	441		325	782
711.5	552		327	551
712.5	467		328	590
713.5	235		328.5	743.5
713.333	455.667		329	851
713.5	460		332.4	662.5
715	443		330	686
716	265		330	804.5
716	482		332.667	594
717.5	231		333	590
717.333	262.667		333	607.5
718	477		333	659.5
720.286	425		335	595
720	241.5		335	667
720.5	250.5		335	806
721	491.5		336	675
720.8	507.4		337	739
720	541.5		339	597
720	950		340	616
721	264		340	810
721	436		342	682
721.5	526		343	733
722.5	363		344	669
722.889	518.333		346.8	564.4
725	352.5		347	735
724	556		349	723
725	485		350.4	726.8
725.5	513		355.5	720.5
726.4	487		355	781.5
727	219		356	717.5
727	452		358	783
727	644		360	646
729	263.5		361.5	579
729.333	444.333		362.25	288.25
729.5	491.5		362.5	744
732	241.75		362.5	795
732	411		363	559
733	284.5		363	814
733.667	303.333		366.167	745.167
733.25	361		365.5	802.5
733	428.5		369	577
733.5	784		370	804
734.5	300		371	376
734.667	395.667		373	733
735	314		373	466
736.6	322.9		374	676
736.25	337.5		376.7	703
735.5	344.5		375.667	806
736.143	373.714		378	730
735	419		378	802
736	277		380	444.5
736	294		381	788
736	350		383	603
738	257.25		383	808
737	389		384.5	593
738	310		384	666
738.5	342		385	632.5
739	279		386.833	721.667
739	281.5		386	741
739.875	316.125		389.222	595.556
739	372		388	807
740	375		389	801
740	742		389.667	864.667
740	780.5		390	615
740	797		391.5	640
741.667	254.333		391	741
741.5	296		391.5	745
741	298		392	599
741.4	337.2		392.6	668.2
742	819		393	621
114.667	854.667		393	692
120.5	674		393	717
121	746		393.5	753
127	838		394.8	601.8
129	674		394.25	750
129	867		395	757.5
129	872.5		397	307
130	742		397	847
131	775		398	811.5
131	786		399.25	624
131.333	850.667		401.6	633.8
134	826		402	631
135	690.5		402.5	705
135	708		403	629
135.5	817.5		403	639.5
136	662		404.8	631.4
138	858.429		404.5	751
137	678		405	707
137	681.5		407.2	634.8
138	712		406	748.5
140	731		409.2	640.4
140.667	666.667		411	759
141	697.333		418	770
141	743		422	734
141	662.5		424.667	575.667
141.5	827.5		433	590
142.667	608.667		435	254
143.667	668.667		437.9	656.2
144	696		439	249
143	819		440	308.5
145	498		442.333	479.778
145.714	785		442	392
146	650		443	483
146.5	805		443.5	610
147	630		444	254
147.5	639		445	337
147.5	854		445	682
147	890		447	279
148	741		447.5	370
149.5	667.5		447	611
149.333	709.667		448	312
149	790		449	673
150.5	726		450	853
151	797		450	311
152	621		451	248
152.5	649		454	571
153	630.5		459	603
153.5	799.5		461	868
153	894		463	325
154	577		465.5	389
154	589		470	388
154.5	778.5		486.5	282
156	603		487	246
156.333	676.333		488.667	232.667
157	693.167		488	240
157.333	786.333		488	264
157	878		489	286
158	602		492	345
158	736		493.5	252
158	744		493	256
160	560.5		496	251
159	857		499	554.2
159	859		497	797
159	877		505.833	559.833
160	586		508	563.5
160	814		513	742
160	872		533.667	434.5
161.5	563.5		534	439
161	805		540.333	933.5
161.667	815.667		541	968.25
162.5	739.5		548.8	737.2
162.5	774		553	101
162	796		563	620
162	801		565.5	618.5
164	663		565	847
164	830		571.5	835.5
164	847		572	823.5
165	795		584	489.5
165	876		586.5	496.5
165	891		590	769
166.5	835		591	258.5
167.25	846.75		591.5	262.5
168	668		592.5	499
168.333	850.333		595.111	422.333
168	870		610.667	222.667
169	648.5		615	820.286
169	805.5		616.286	810.857
171	808.714		621.333	146.333
169	813		626.571	1011.29
169.5	861		628	561
170.5	788		628	1008
170.5	870		629	557.5
171	555		638.5	481
171.5	843.5		638	489
171	872.5		644	1009.5
173.2	803.6		646.571	424.286
174.5	640		648.75	445
174	826.5		656	1008.75
174	862		660	543
174	868		672	53
175	562		680.143	272.571
175	680		679.5	968.5
175	690		681.667	269.333
176	839.5		686	247
176	686		689.5	919.5
176.5	701		691.4	952.8
176	717		693	949.5
177.286	813.857		698	946.5
177	726.5		698	104
177.333	738.333		701	77
178	686		702	75
178.714	717.714		704	376
178	859		719	777.5
178	864		45	664
179.5	683.5		47.75	698
179.5	710		61	584.5
179	808		64.3333	611.333
180.8	870.4		66	588
180.333	873.333		68	627
182.75	811		69	603
183	837.25		70.5	589.5
183	803		79	617.143
183	847		79	763
183	913		80	593
184	849		82	700
184	862		84.5	590
184	868		88.3333	581.667
186	556		88	594
186.714	828.143		94.5	586
187.8	658.4		94	592.5
188	841.75		95	629.5
188	758		96.5	764
188.5	851		98.5	515
189.5	560.5		98	690
189	815		99.6667	528.667
189.25	822.5		99	761
190.5	786		102	562
190	861		103	787
191	887		104	587
191.5	607		104.5	784
191	816		105	544.5
192.5	828.625		105	639
191	851		105	727
191.5	856		107	696
192	866.5		109	751
192	518		110.333	540.667
193	811.4		110	763
192	846		112	598
193.5	646		112.5	762.5
193	758		114.2	760.8
194	630.5		116.5	640
195	805.333		117	597
195	852.5		117	642
195	856.5		121	642.25
195	864		124	604
196	724.5		125	661
196	814		125	663
197	844		126.5	504
197	925		128	581
198	814		128.5	740
198	859.5		132	739
198	870		133	591.5
200	775.5		135	509
200.667	812.333		135	738
200.667	839.667		135.5	750
200	845		135	788
201	799		136	594
202	803		137	469
201.5	824		138	467
201.5	859		138	639
202	827		138	753
202	831		139	767.5
202	856		141	558
204	655		141.5	606
204	598		143	549.5
204	827		143.667	613.333
205	614		145	781
205.5	661.5		147.5	536.5
205	822		147	774
205	841		148	703
206	684		149.2	713
207.714	806		149.667	513.333
207.5	843		150	545
207	852.5		150.333	613.333
208.333	590.333		150	675
209.5	620.5		150.5	802
209	715		152	529
210	582		152	670
210.5	824		152	709
211	592		152	854
211	828		153	593
211.5	835		153.25	607
212	872		154.5	844
212	755		158	609
213.5	817		161	649
213.75	823.25		163	723.75
214	597		163	569
215	651.714		163	576
214	820		163	618
214	838		163.5	736.5
216.2	835.4		163	766
215	845		163	854
215	860		163	871
216	594.5		163	873
217	783.75		164	918
217.167	798.167		165	562
216.333	824.667		165	665
217.5	871.5		166	507
217.5	598.5		167	565
217	626		168	586
217	847		168	728
218	612		169.625	720.375
218	804		169.8	725.8
218.5	810		169	734
219	556		169	803
219.5	560		170.5	730
220	646		171.75	732.75
221	820		171	736
221.5	788		171	761
222	652		171	857
222	683		172	483
222.875	762.25		172	544
223	578.5		174	467
224	645.5		174	558
224.667	699		174.571	731
225.5	649		174	735.5
225.5	819		174.5	887
226.5	646		175	696
226	804		175	722.5
226	879		175	726.5
227	467		176	691
227	737.5		177	566
228	504.5		177	686
228	835		178.667	714.333
229.667	520.667		178.667	725
229.5	688.5		180.333	706.333
229	826.5		181	678
230.667	537.667		181.333	807.333
231	787		182	473
231	829		182	708
232	675.5		182	750
233.5	766.75		183	802
232.4	833		183	805
233	764.5		183	869
234	795.5		184	477
233	893		184.667	668
234	713		184.6	710.4
234	720		184	733
235	803		184	877
235.4	880.8		185	673
236	540		185	695
236	607		187.5	704.5
236.25	687.75		187.333	790.333
236.5	750		188	752.5
236	788.5		188	770
236	894		189	723
238.333	916.333		189	827
238	939		189	849
240	632		190	725
240	862		190	744
242	535		190	748
242	795		190	772
243	571		191	696
243	950		191	740.5
244	556		192.75	639.75
244	631		192	668
244.333	727.667		192	730
244.889	869.556		193	670
244	878		193	694
245.5	734		193.333	747.667
245.333	799.667		194	751.25
245	874		193	779.5
246.5	580		193.5	845.5
246	584		193	853
246	586		194	696.5
246.625	716.625		194	775
246	724		194.778	814.222
246	974		196	773
247.5	825		196.857	784
247.5	933.5		196	871
248	572.5		197	642
248	756		197	682
248	830		197	687
249.5	682		197	754
249	839		197	790
250	825		197	794
250	861		198.4	766.2
251.5	499.5		199	717.5
252	688.5		199	858
252	708		200	684
252	722		200.667	769.333
252	826.5		200	784
252	850		200	789
252	863		201	590
253.5	534		201	719
253	829		201	736
254.4	881.2		201.5	759
254	727		202	566
254.25	756.25		202	756
254	831.5		202	795
254.5	840		203.333	679.333
254	864		203	787
255.667	694.667		203	798
256.167	702.667		204	712
255	784		204	924
256	645		205.5	755
256.5	786.5		205	777
257.5	700		205	821
257.5	849		205	876
259.286	792		207	750
258	869		208.5	777.667
260.333	756.833		208.5	408
259	822		208	737.5
259	899		209	758.3
260	742.5		208	770
260.75	796.25		209.2	830.8
261.286	877.857		208.5	868
261	858		209	455
262	476.5		209	734
263	550		210.778	753
263	884		209	877
263	924		210	664
265	597		210.5	679
264.8	605.6		210	762
264	678		210	785
264.667	729.667		210.5	835.5
264	734		210	946
264.5	854		211	666
265.5	761		212	581
265	787		212.5	583
265.5	878.5		212.5	769
265	924		212	787
266	603		212.75	875
266	793.5		213	680
267	679		213	733.5
267	831		213	762
267	883		214.5	787
268	597		214	867
268	979		215	646
270	684		215.5	648.5
270	736.714		215	655
271.5	826.667		215	723
271	534		216.75	767
271.5	713		216	866
272.25	512.25		217	713
273	529.333		217	738
273.667	806.667		218	740.667
273	836		217	856.5
273.5	845		219	712
274.5	661		219	762
274	815		219	851.5
275	730		219	854
276	404.5		220	646
276	412		221.143	766.714
276	683		220	894
276.833	706.167		222	839
276.5	791.5		222.5	886.5
276.5	874.5		222	889
277.667	815.667		223	470
277.5	847.5		223	905
278.5	499		224	517
279	558		224	539.5
278.75	695		224	709
278.5	863.5		226.286	711.857
279	525		225.667	717.333
280.429	562.571		226	868
280	654.75		226.5	961.5
279.5	845		227	723
279.667	857.333		228	840
280	540		229	536
280.5	554		229	814
280	571.5		229	847.5
280.5	833		230.667	417.667
280	903		230	836
281	467		231	426
282.4	639.4		231	533
281.5	650		231	728
281	676		231	859.5
281	780.5		231	876
281	825		232	595
282.5	558		232	831
282	690		232	834
282.5	773.5		233	714
283	876		233.333	763.667
283.5	890.5		233.4	837.2
284.333	723.333		235.125	374.875
284	812		234	711
284.333	858.667		235	649
286	705		235	859
285	745		236	652
285	752		236	831
285.333	807.333		237	808
285	833		238	718
286.5	529.5		239.286	772.429
286	548		238.5	777
286	561.5		239	741
286.5	877.5		239	787
287	129		239.667	858.333
287	833		239	880
288	537		240	738
289.167	559.5		242.1	761.8
288.5	719.5		241.2	796.8
288	931		241	730
289.25	512		242	756.5
290.333	545.5		242.2	861.4
289	679.5		242.333	871.556
289	890		243.857	670.714
290.833	567.667		243.5	799.5
290	669		243	724
290	845		243	802
290	858		243	813
292.25	673.75		243	845
293	550.75		243	853
292	853		244	705.5
293.6	614.2		245.333	745.333
293	657		245	757.5
293	736		245	814.5
294.125	827.875		245	826
294	596		245	852
294	598		246.222	857.667
294.5	607		247	700.4
294	647		246	725
294.5	831		246	740
294.857	854.143		246	824
295	524.5		246	829
295	546		247.1	833.3
296.8	528.8		246.667	915.333
296.875	532.875		247	675
297	660		247.667	708.333
297	703		247.5	784
297.5	843.5		247.5	798
297	864.5		247	810
298	556		247	817
298	676		247	841.5
299	825		248	747
300.2	524.6		248	865.5
299	530		249	759
299	550		249	763.5
299.5	592		249	814
300	680.167		249	823.5
300	835.25		250.333	674.333
300.333	490.667		250	708.5
300	582		250	818
301	839.8		251	736
300.667	845.333		251	863.5
300.5	865.5		252	372
301	530		252.333	699.667
301	552.5		252.5	704
301.571	684.571		252	714
302	859		252	855
303.667	798.667		252	889
304.5	775		252	922
304	839		253.5	812
305	144		253	858.5
305	658.5		254	733
305	833		254	748.5
306	478		254	751
306	630		254.5	817
306.5	633		256	687
306	654		255	720
306	835		255	736
307	592.5		256	754.333
307	853.5		255	814
308.2	857.4		256	715
308	624		256	733
308	654		257	749.75
308	722		256	800
309	685		256	812
309	850		257	712
310.6	645.2		257	720
311	192.5		257	722
311	839		257	836
312	370		258.667	514.333
312	716.5		258	677
313.667	601.667		259.556	798
314	598		258	801
314.5	660		258	818
314.333	804.333		258	964
314	817		259	623
315.5	872.5		259	672
315.714	150		259	898
315	203		259.25	925
315.5	539.5		260	596
315.75	823		261	817.333
316	210		261	709
316	715		261	731
316.667	858.667		262.143	754.571
317	180		261	810
317	508.5		262.5	761
318.333	796.667		262	832
319.5	155		263	695
319	179		263.5	786
319	494		263	799
319	707.5		263.667	810.667
321.571	584.857		263	863
320.5	617		264.333	704
321	189		264	718
321.5	750		264	842.5
322	549.5		265.667	800.667
322.667	747.667		265.333	836
323.8	165.4		267.2	727.4
323	259		266	747
324	798.5		266	767
324.5	200		267	680
324	505.5		267	688
324.5	520.5		267.667	702.333
325	153.5		267	846
325.5	524.5		267	876
325	749.5		268	507
325	787		269.833	734.333
325	868		268	736.5
326	159		268	763
326.5	185		268.5	802.5
326.5	205		269.2	844
326	484		269	648
326	663		269	757
326	789.5		269	795
326	890		270	821.2
327.5	598		269	849
329	658.5		269	972
328.167	763.833		270	747
327.333	773.667		270	868
329.3	181		270	954
328	525		271	558
328	852		271	641
328	921		271	724.5
330.2	126.6		271	762
329	155		271	804.5
330	130		272.5	713
330.5	139.5		272	744
330	194.5		272	789
330.5	656		272	809
330.5	671		272	895
331	174.5		273.5	622
331.5	187.5		274	697.5
331.25	586.75		273.333	718.667
331.5	749.5		274	798.75
332.5	759		273.333	827
333.6	509.2		274	715
333	514		274	822
333	588		274.5	842.5
334	671		274	928
335.5	752.25		274	935
334.5	791.5		275	723
334.75	796		275	781
336	247		275	819.5
335	758		275	931
336	178		276	605
336.667	226.667		276	771
336.667	305.333		276	776
336	583		276	929
336	589		277	684.5
336	639.5		277	767
336	657		277	779.5
336	766		278	574
337	185		278	702
337	200		280.143	766.286
337	208		278.8	769.4
337.5	493		279.5	239.5
337	496		279	636
337.5	527.5		279	780
337.6	628.2		280	552
337	636		280	656
338	320		280	670.5
339	666		280.5	686
339	136		280	700
340.125	183.125		280	763
339	202.5		280	793
339	217		281.5	741
339.25	497.75		281	930
339.5	606.5		281	939
339	624		282	632
340.5	191		282	706
340	211		283	769.25
340	489.5		282	790
340.5	644		283	820
341	123		283	865
341	180		284	573
341.5	207		285	693.4
341	477		284	738
341	588		284	779
341	726		284	855
341.333	868.333		285	710
342.5	113.5		285	712
342.5	213.5		286	743.167
342.5	481.5		285	754
342	681		285.667	788
343.5	786		287	698.667
343	678.5		286	733
343	685		286	791
344.875	480.25		286	903
346	185		287.5	685
345.5	210		287.5	687.5
346	216.25		287	696
345.667	414.333		287	718.5
345.667	575.667		287	848.5
345	700		288	772.5
345.429	774.429		288	839
346	190		288	914
346.5	475		289	724
346	510		290	776
346	516		289	868
347	214		290.667	707.667
347	239		290	730.5
347	572		290.5	742
347.5	633		290	783
348	748.75		290	798
347.667	760.667		291	733
348	529.5		291	759
349.3	654.4		292.7	846.6
348	743		292	670
348	813		292	676.5
349.833	216.167		292	704
351.1	223.7		292	881.5
349.75	234.5		293.5	712
349.5	570.5		293	812
349	666		294	680
350	139		294	706
350	251		295.333	718.5
350.5	412.5		294.5	749
350.4	597.8		294.333	767
350	762.5		294	778.5
351	197		294	783
351	795		294	832
351	811		295	695
351	898		296.444	763
352.5	184		296.375	641.375
352.5	514		297.2	690
352	558.5		296	723
353	601.333		296	733.5
352	699		296.667	744.667
352	746		296.5	770
353.667	222		297	791
354	233.222		297	119
353	628.5		298.5	711.5
353.667	751.667		297.667	869.333
354.333	172.333		297.75	889.25
354	214		298	566
355	657.25		298	664
354.5	746		298.667	716.333
354	841		299.667	767
355.5	244.5		299	183
355.5	605		300	684.286
357	128		299	699
356.667	184.667		299	733
356	187		299	792
356.5	208		299	851
356	241		299	858
356.4	585		300.667	169.333
357.4	681		300	175
357.5	193		301	774.667
358.111	214.333		300	784
357	233		300	799
357	688		301	707
357.5	759		301	714
357	861		301	797
358	778		302	125
358	815		302	694
358	867		302.5	697.5
359	209		302	710
359	252		303	637.5
359	504		303	640
359	539		303.25	723.25
359	581.5		305	178
359	714		304	692
359	846		304	736.5
360	861.286		304	829
360	183.5		304	837
360	264		305.5	763
360.5	413		305	767
360.5	516.5		305	774.5
360.5	744		305	820
362	169.75		305	823
361	177		305	831.5
361	199		305	866
361.5	755		306	155
361	758		306	726
361.5	783.5		306	809
361	786		307	748
361.5	839.5		307	770
363	187.333		307.333	827.333
362	216		307	834
362.75	253.25		308	168.5
362.5	257		308	664
362	901		308.5	780.5
363	636		308	786
363	650		309.4	816.2
364.2	705.6		308	831
363	768		309	641
364	849.333		309	744.5
363.5	854		309.5	784.5
364.8	202.6		309	833
364	207		310	681
365	259.8		311	746.75
365	264		310	752.5
364	452		310	830
364.5	571.5		310	999
364	615.5		311.667	178.333
364	666		311	200
364.5	762		313	170.833
364	788		312	673
364	799		313.667	784.222
365	863.5		312.75	790
366.4	161.6		312.5	815.5
365	217.5		312	820
365	327		313.5	308.5
365.5	463		314	745.333
365	527		314	748.833
365	601		313	811.5
365.8	623.2		314	677
365.667	628.667		316.444	708.444
365	783		314	755
365	856.5		314	965
[truncated: 11,372 more rows]
