# Supplementary material for: Spinal lumbar dI2 interneurons contribute to stability of bipedal stepping
Source: eLife. 2021 Aug 16;10:e62001. doi: 10.7554/eLife.62001 (PMC8448531; doi:10.7554/eLife.62001)
Supplement: Figure 4—source data 1. — The X/Y coordinates of dorsal root ganglion (DRG) axons and premotor neurons (pre-MNs) axons (Figure 4A and B). The X/Y coordinates of dI1, V1, and synapses and 5HT terminals at the sciatic level (Figure 4C–E). [file elife-62001-fig4-data1.xlsx]

## Sheet: Sheet1
Sensory afferents			Pre-MNs projections				dI1 synapses				V1 synapses				5HT terminals
Crural			Sciatic				Sciatic				Sciatic				Sciatic
x	y		x	y			x	y			x	y			x	y
174	683		723	447			183	690			88.4	569.2			78	658
175.5	685.5		731	447			201	665			120.333	523.667			88.5	567
177.25	662		759	447			210.833	742.667			130	577			107	523
178.333	669.889		760	447			211	733			131.5	678			114	526
177	681		668	448			212.5	768			164	840			118	592
177	688.5		669	448			213.5	698			169	715			121.8	504.6
177.333	692		703	448			217	731			168	844			130.5	534.5
178	628		710	448			222.5	768			175	723			133	579
179	695.5		711	448			222.5	775.5			179	693.5			134.5	507
180.667	655.333		712	448			222.5	783			183.8	696.4			138.667	646.333
180	658		713	448			226.286	773.571			188	930			142	591
181	646		714	448			226	780			189	731			143	513
183.2	638.6		715	448			235	731			197	716			144	523
183	643.5		716	448			235	743			199	748			146	528
184	652.4		759	448			238.2	731.4			202	751			152	540
184.667	633.667		760	448			237	747			206	806			154	597
187.833	621.389		610	449			239	745			207	760			157	588
186.889	628		711	449			241	696			213.5	664			157	597
192.828	612.31		712	449			242.5	733			213	718			162	513
189	715		713	449			252	764			217	677.5			167	586
191	618.5		714	449			253	639			218	583			178.4	571.7
194	687.5		716	449			254.333	717.111			220	324.5			179	616
194	708.5		717	449			255.5	635			220.167	712.333			183	548
195	635		729	449			255	781			223.333	298.667			188.5	623
196	698		758	449			257	813			223	688			200	585
197	603		759	449			257.5	680			227	810.444			202.667	307.667
197.5	607		552	450			258.5	670			235.333	665.667			202	514
197	693.5		553	450			258	775			241	799			203	311
198	613.5		554	450			261	816.5			244.5	637.5			203.4	674.2
198	689.5		555	450			262	644			244	710			206	634
198	697		557	450			268	706			244	772			210.333	294.333
199.5	604.5		594	450			271	699.5			246.5	710.5			211	625
199	629		616	450			272	696			247.5	773			217.5	535.5
200	613		711	450			272	824			248	753			219	641
201.5	684.25		712	450			273.333	642.333			251	752			225	624
202	614.5		468	451			274.5	764			254	670			231	637
205.733	678.067		469	451			276.25	699.75			254.5	688.5			231	666
205.333	605.333		595	451			275	794.5			258	268			232	686
205.333	612		697	451			277.5	644			263	673			235	440
206	599.5		698	451			277	332			265.333	537.333			237.333	580.667
208	591.25		709	451			277	764			265.667	641.333			238	607
207	603		710	451			278	798.5			265.5	673			238.5	622
208	609		711	451			278.5	827			266	677			241	704
209	600.5		754	451			279	313			269	673			242	308
213.7	602.5		442	452			279.5	750.5			270	283.5			242	643
211	665		443	452			280	763			273.5	382.333			244	307
211	678.5		444	452			280	578			272	675			244	609
212	674		467	452			280	722			273	655			244.5	626.5
213	584		468	452			280	788			275	648			245	629
213	607		469	452			281	716			277	384			247	622
215.25	592		470	452			281	801.5			281	638.5			247	308
216.667	436.111		695	452			284	667.25			282	462			248	642.833
217	432		696	452			284	310			283	799			250	640
217.5	596.5		697	452			284.5	576			284.667	390.667			251	597
218	662		698	452			284	748			284	729			251	683
220	438		699	452			286.571	312.286			287	799			251.5	709
221.167	592.167		700	452			285	353			289	479			253.5	463
222	563.333		708	452			285.5	775			291	607			253	656
222	588		709	452			286.5	717			295	795			254	640
222	701		710	452			286.5	751			295	864			256	634
223.571	578		711	452			287.125	830.875			301	838			256.667	717.333
225.538	569		726	452			288	836			301	840			257.5	602
224	584		470	453			289	331			302.857	607.714			257.333	726.667
224	596		549	453			289	690.5			307.375	605.25			258.5	590
225.5	564.5		550	453			289	801			309	593.5			259.2	631.8
228.167	591.5		566	453			290	309.5			308.5	597.5			258	660
228.333	445		567	453			292	659			310.5	591			259	626
231.364	246.273		568	453			293	308			312.2	731.6			260.5	629.5
231.2	566.8		572	453			293.5	310			316.667	794.667			260	654
232	754		611	453			294.2	813.6			317.8	554.6			260.667	694.333
233	709		695	453			294.667	370.333			317.5	800			261	698
235.381	254.476		696	453			295.833	828.833			321.625	442.75			261	700
235	241		697	453			296.5	295			320.5	631			262.2	305.8
250.691	261.215		709	453			297.667	317			322	555.667			262	555
237.667	228.333		710	453			296	652.5			323	807			262.5	626
237	590		725	453			296.333	656.333			323.333	674.667			262	639
240.083	254.333		726	453			296.5	839			326.5	672.5			264	632.6
238	268		408	454			297	314			326	809.5			263.5	641
471.479	288.202		409	454			297.5	831			326.4	641.8			266	642
240.333	235.667		472	454			298.5	371.5			329	812.5			266	784
240	250.5		566	454			298	605			329	646			267	316
240.75	587.75		567	454			299.5	308			330	558			267.667	625.667
241.333	217.333		568	454			299.5	736			331.75	774.75			267	648
243	270.3		571	454			299	758			332.6	541.2			267.5	706
243.5	249		572	454			300.667	323.667			334.429	624.857			268	641
243.333	597.333		573	454			300	633			334	686			273.5	753
246.25	274.417		580	454			300	827			334	697			274	591
245	203		581	454			303	311.5			334.667	761.667			274	748
245	574		582	454			303	815			335.5	771.667			275	323
245	601		583	454			304.5	658			335	616			275	636
245.5	836.5		592	454			305	796			335	692			276	327
246.8	592.6		621	454			307	342.5			337	540			276	749
248	204		659	454			306.667	759.667			337	769			277	632
249.333	603.167		660	454			308.857	330.857			338.667	503.333			277	704.5
254.627	278.78		695	454			309.5	758			338	707			278	757
249	577		709	454			310	268			338	779			279	608
250	596.5		725	454			310	555.5			341.2	343.6			280.5	514.5
250	607.5		726	454			310	599			341	771.5			280	634
250	611		423	455			310.667	732.667			341	535			282	660
250	839		424	455			311	308			345	535			283	338
251	619		572	455			311.5	802			344.556	753.667			283	613
252.667	602.333		579	455			312.5	756			345.667	715.667			284	540
254	273		580	455			313.5	316			346	397			284	636
255.062	393.5		581	455			313	603			347	423			284	644
254.333	610.167		591	455			313.5	670.5			347	740			285	654
255	586		592	455			314	661			348	839.5			287	664.333
255	599		620	455			315.714	285.857			348.5	707.5			287.5	317
255	662.5		621	455			315.333	290.333			349	424			287.5	608
256	596		658	455			315.5	334			350	834.5			288.5	611.5
257	598.5		529	456			315	849			350	766			293	610
257	603		586	456			318.25	296.25			350.5	864			295	610
267.805	288.377		587	456			316.5	350			351	837			300	610
258.5	594.5		588	456			317.5	669			352	622			302	612
260.25	258.25		589	456			316.5	691			352	676			303	325
259	273		590	456			317.125	728.125			352	763.5			303	774
259.667	683.667		591	456			318	315			353	570			304	600
260	192		621	456			317.5	788.5			353.5	618			307	777.5
262	244		622	456			318	334			354.5	527.5			308	524
262	255.5		658	456			319	271			354	593			311	605
262	576		585	457			319.5	277			354.5	761			312.5	610.5
262.5	647		586	457			319.667	346.667			356.167	379.333			312.8	780.4
262	661.5		587	457			319	389			355.5	553			314	624
264.222	279.778		604	457			320.5	269			356	845.5			314	742
263	283		605	457			320	298			358	773			317	606.5
263	546		622	457			320	335			359.5	576.5			318	634
263	851		751	457			321.2	722.6			359	590			318	667
264	250		464	458			321	339			359.7	630.1			320	742
265.7	256.833		465	458			321.5	389			359.5	721			323.667	436.333
265.111	265.556		466	458			322.333	605.333			360.5	487			324	736
267.208	274.542		467	458			322.8	663.2			361.333	784.667			327	612
265	190		468	458			322.25	332.25			362.5	554			330.5	780
265	612		469	458			322.5	345			362	575			331	778
266	555		470	458			322.667	708.667			362	591			333	641.333
266	567.5		494	458			323	700			362	716			334.5	781
266	601		533	458			324	364			362	718			337.5	640
269.824	297.412		534	458			324	794			365.75	535.25			341	642.5
267	641		588	458			325	356			364.5	590			353	733
267	836.5		589	458			325	687			365	432			358	588
267	843		603	458			325.5	700			365	548			367	576
268	658		604	458			326	325			366	573			373	810
268	661		622	458			326	340			367	421			374	767
268	788		716	458			326	698			367	423			383.5	793.5
269	818.5		717	458			326	726			367.667	546.333			386	792.5
270	303		428	459			327	248			367.333	556.667			391	811
271	612.25		429	459			327	367			367	910			393	626
271	274		430	459			327.5	705.5			368.667	540.667			393	792
272.538	659.154		470	459			327	806			368	544			396.667	795
271	662		471	459			328	761			369.4	536.8			399	299
273.429	790.571		472	459			329.667	362.667			369	718			400	798
274.1	808.6		586	459			329	367.5			369	730.5			411	808
278.171	303.513		587	459			330.375	734			369	740			418	791
274.857	612.286		588	459			331	344.5			371.857	203.857			429	757
276.359	634.923		589	459			330	589			372.875	735.875			450.143	435.429
274.667	682.889		716	459			331	368			372	715.5			467	808
274.667	174.333		429	460			331	694			373.667	622.333			469	847
275	311.5		430	460			332	335			375	531			494.25	289.875
275.5	815.5		471	460			332	649.5			375.9	732			511	528
276	658		472	460			332	686			375.8	634.4			515	540
276.5	664.5		473	460			334.167	832.667			375	763			519.25	542.25
278.125	249.875		474	460			333	768			377.444	568.222			533.5	312
277	652		475	460			334	770			377.75	626.125			538	307.5
277	654		476	460			335.5	293			377	564.5			539.8	552.6
277	800		477	460			335.667	772.333			378.2	572.4			540.333	305
278	608		486	460			336	585			377	682.5			583	744
278	619		487	460			336	626			377.5	713.5			584	718
278.667	686		585	460			336.667	677			378	690			585	475
280.571	181.286		586	460			336	860			378	721			599	698
281.625	603.375		587	460			337	567			378	808			601.333	697.667
282.857	620.857		593	460			339	578.667			379	577			601	812
282.818	633.727		595	460			339	719			379.667	662.667			624.5	348
280	640		696	460			340	646			379	761			633.5	820
281	562		448	461			340.714	678			380	237			634	787.5
281	629.5		449	461			340	725			380	614.5			638.5	687.5
283	559		450	461			340	795			384.333	587.778			658	683
283	565		451	461			340.8	831.4			381.5	782			662.1	305.8
283	569		454	461			341.5	310.5			383	481			663.667	676.333
284.2	608.7		465	461			341.5	347			383	239			666.222	669
284	580		466	461			342.6	566.8			383	512			665	674
286	264.714		467	461			342	722.333			384.222	631.333			679.5	379
285	612		473	461			342	372			383	642.5			691	341
286.5	249.5		474	461			343	623			383.5	721			697	350
286	305.5		475	461			343	582			383.5	732			712	781
286	619		476	461			343.5	601			383.5	768.5			713.5	778
286	715.5		477	461			343.333	690.667			383	787			715.5	327
287	268		486	461			344.5	375			384.5	553			722.5	321.5
287	503.5		487	461			345	616.167			384.333	569.333			723	597
287.5	560.5		578	461			345.4	288.8			384.5	640			730	394
287.667	606.667		579	461			345.833	311.5			384.5	682			731	400
287.333	702.667		580	461			345	317			384	737			732	373
288	209		585	461			345.5	339			386.5	672			733	358
288	213.5		586	461			345.5	580			387.5	374.5			733.5	360
288	490		677	461			345	687			388	487			733.5	369
288	497		404	462			346	321			388	518			734.5	364
289	241		449	462			346	726			388	565			736	361
289	582		456	462			346	767			388	632			737.5	364
289	650		457	462			346	833			388.5	682			738.5	376
291.25	209.5		466	462			349	313.5			390.5	498			738	573
290	626		467	462			348	584			390	509.5			739	412
290	638		469	462			349	326			392.75	671.625			741.5	366
290	664		472	462			349	334			391.5	677			743.5	359
290	706		473	462			349.333	341.333			391.5	481.5			747	364
290	859		474	462			349	601			391	682			756	788
292	222.25		475	462			351	644			392.5	477			774	541.5
291	234.5		476	462			351.5	729			392.5	495.5			782	751
292	240.7		481	462			353	786			392	515.5			117.6	535.4
291	245.5		482	462			353	287			392.5	565			120	532
292	629		555	462			353.5	364			392.5	824			125	553
292.667	636.333		578	462			353	711			393.8	449.6			125	555
292.667	721		592	462			354.333	300.333			394	474			130	570
293	218		593	462			354	311			394	633.5			131	521
293	246		594	462			354	577			395.286	681.571			138	574
294	239		605	462			354	730			394	709			139	531
295	202		606	462			355	433			395	244			141.8	601.6
295	224.5		703	462			355	571			396.333	322.333			142.667	701.333
296	254.5		704	462			357.5	399.5			397	376			143	534
299.25	228.5		412	463			359.5	413			397.5	489.5			146	700
298	235		413	463			358.5	437			398.833	586.833			146.333	564.667
299.667	330.333		444	463			358	732.5			399.333	603.111			146.5	716
300.833	239.833		445	463			358	779			400	570			150.5	715
301	244.375		448	463			360	435			400	625			151	541
299.4	560.2		454	463			360	661			402.667	546.111			151	711
302.091	206.455		455	463			361	290			403	624			152	750
300	208		456	463			362	406.5			403	627			154.571	712.571
300.333	235.667		457	463			361.5	640.5			404	674			154	786
300	384.5		458	463			361	648			404.667	472.333			157.5	577
301	334		472	463			361.5	742			404.4	594.8			157.5	700.5
302	219.5		476	463			362.5	672			404	690			158	731
302	547		477	463			362.5	686			405	698.5			161.5	473.333
303	217		478	463			363.5	314			404	710			161	616
303	252		550	463			363	652			404	745			161.5	716
303.5	330.5		575	463			364	518			407	382			166	741
303	333		580	463			365.5	380			406	722			168	705
304	198		581	463			365.5	647			406.5	547			169	559
304	232.5		604	463			365	760			406	585			170	760
304	249		605	463			366	321			406.5	691			171.5	700
305	221		651	463			366	348			407.5	571			171	710
305	225		655	463			366.667	650.667			407	647			173.25	719.25
305.8	239.6		656	463			366.5	777			407.5	688			172	760.5
305.667	855.333		676	463			367	543			407	695			173	710
307.5	203		389	464			367	658			408	236			173.5	757
306.4	243.6		413	464			367	749			408	599			174.5	678
306	577		414	464			368.75	316.25			409.5	681.5			174.5	714.5
307	248		415	464			368	327			409.5	647			178	718.75
307	553		416	464			368.333	640.333			410	585.5			178	608
307	610		458	464			368	666			411	262			178.4	685.6
309.909	253.182		476	464			369.5	684			411	693.5			179	682
310	244		477	464			370	615			413.286	540			179	713
309.5	259		478	464			370.5	659.5			413.5	573.25			179	737
309	279		479	464			370.5	731			412.5	666			180	624
309	290		483	464			371.4	830			412.8	723.4			180	668
310	265.5		484	464			371	255.5			413.25	530			180	717
312.7	484.8		578	464			371	312			413.333	682.667			184	570
311	205		579	464			371.5	662			415.667	470.667			186	664.5
312	239.167		580	464			371	776			415	584			188	465
311	248		592	464			372	646			416	213			189	480
311	341.5		593	464			373	318			418.75	583			189	531
312	596.333		654	464			373	685			419	434.5			191	790.5
313.5	608.929		655	464			373.5	705.5			419	226			192.5	455
312.5	203		656	464			374	345			419.333	411.667			193	527
312	264		681	464			375	288			419	469			196	529
312	557		682	464			375	318.5			420.5	594			197.5	673
312.75	563		716	464			375	340			420.5	789			199	627
313	620		399	465			375	656			421.5	469			198	652.5
313	623.5		400	465			376.5	270			424	534			198	713
313.4	627.8		401	465			376	632			425.667	449.667			199.667	527.667
314	196.5		413	465			378.5	308			425.333	531.333			199.5	717.5
314	241		414	465			379.429	291.571			426.5	535			201	650.5
314	329.5		457	465			379	614			426	541.5			201.833	670
314	532		458	465			379	661			426.5	750			201	654
315	677.5		546	465			380.5	321			427	418			201	673
314.333	862		571	465			380	572			427	453			202.5	667
315	246		572	465			384	377.6			427.5	637.5			203.4	632.4
315	597		573	465			382	558			427	792			203	658
315	601		574	465			383	645.25			428.5	396.5			203	727
316.5	188		577	465			383	493			428.667	529.667			204	649
316	429		578	465			383.5	663.5			431	685			204	654
316	489.5		579	465			384	618			429.5	409.5			205	636
318.2	583.4		400	466			385.5	279			430	456.286			205	663
316	603		401	466			385	322			430	539.75			205	700
316	608.5		402	466			385.333	660.333			429.875	599.75			206	691
316	647		570	466			388	254			429	770			207.5	660
317.333	183.333		589	466			387	295.5			430.5	254			207.667	662.667
317	241.5		656	466			388	566			431	403			207.5	687
317.5	570		686	466			387	799			431	791			208.667	693.333
318.5	580.5		767	466			388.8	568.4			432.5	405.5			210	651
318.5	597.5		768	466			388	794			432	874			210.667	660.333
318	601		383	467			389	372			433.667	446.333			211	526
318	606		384	467			390	363			433	540			211	529
322.909	194		385	467			390.5	617			434	323			211.667	711.333
320.333	462.667		399	467			390.5	644			434	633			211.75	728.25
319.5	609		400	467			391	662			434.833	713			211.5	735
319	618		417	467			391	669			434.5	728			212	517
319	621.5		418	467			391	278			436	339			212	654
319.25	717.25		469	467			392.5	665			438.2	884.6			213	658
319.5	869.5		531	467			392	742			438.4	291.2			215.5	597
320	556		573	467			392	846			438	761			216	642.667
320	591.5		686	467			393.5	494			438.5	783			215	654.5
320	682		687	467			393.5	672			439	487			215.5	663
321	713		766	467			395	291			439	715			215	724
322	165		767	467			395.667	777.667			441.5	538			215	731
322	597		377	468			395	844			440.4	711.2			216	516
323	478		381	468			396	274.5			440	764			217.5	711
324.625	485.688		382	468			396.333	580.333			440	809.5			217.5	600
323	492		383	468			397	639.667			442	625.667			217	640
323	559		385	468			396.667	766.667			441	644			217	749
323	576.5		466	468			398	624			441.5	719			218.5	612
323	583.5		467	468			399.4	724.4			441.333	724.667			218	647.5
323	682		468	468			398	784			441.5	773			218	661
323.5	715.5		567	468			399	575			441.8	776.6			219.5	596.5
324	188		568	468			399	636			442.5	404.5			220	676.5
324.4	407.2		571	468			400.5	266			443.167	561.5			221.6	734
324	475.5		607	468			400	480			442.333	683.333			220	751
325.091	573.727		654	468			401.2	658.4			442	728			222	647
325.75	566.75		735	468			400	671			442.75	767			222.5	713
325	607		736	468			401	634			442.667	782.667			223	632
325	644		381	469			401	721			443	554			224	513
328	475.071		382	469			401	771			444.5	595			224.667	679.333
326	488		383	469			402.5	661.5			444.4	735.8			225	633.5
326	528		384	469			403	582			445	406			226.5	645.5
327	413		385	469			403.5	725			445	518			227	706
327	579		401	469			403	771.5			445	770			228	651
327	596.5		564	469			403	777			446	554			228.5	716
327	603.5		565	469			403	841			446.5	695.5			229	381
329	188.333		566	469			404.333	504.333			447	420			229	588
329	195		686	469			404	719			448.2	537.6			229	682
329	544		383	470			404.5	782			447.667	757.667			229	718
330.5	564		384	470			405.5	627			448	742.5			229	740.5
329	566		385	470			405.667	645.333			451	361			230	809
329	570.5		386	470			406.5	718			450.556	578.333			231	495
329	579		400	470			406.5	771			451	212			232	485
331.947	592.289		401	470			407.5	508			451	792			232.5	658
330.25	724.75		405	470			407.667	607.667			453.571	537.286			233	722.333
333.167	181.75		562	470			407.5	654			455.167	437.667			233.4	734
330	504		563	470			407	675			454.5	683			232.5	745
330.333	585		564	470			407	680			454	762.5			233	739
331	176		620	470			407.667	779.667			456.5	310.5			236	714
331	710		651	470			409	287			455	632			237.6	759.8
333.2	355.8		652	470			409.667	582.667			455.333	810.667			237.5	681
332	484		692	470			409	590			455	813			239	697
332	581.5		693	470			409	593			456.5	415.5			239	741
332.5	642		694	470			409	806			456.667	720.667			239	743
340.882	570.2		407	471			410	273			456	756			240.5	701.5
333	656		408	471			411	628.5			457	669			241	487
339.889	137.593		418	471			411	636.5			458	347			241	832
334	483		419	471			414.222	792.667			459.286	537.429			242	586
334.5	559		478	471			414.667	484.667			458	588			243	691
336.952	601.81		557	471			415.667	368.333			458.6	821.8			245	442
335	659		561	471			415	630			459.5	511			245	750
336.571	146.143		562	471			415	639			460.5	413			245	760
336	625		650	471			415	656			461	590.25			246	395
336	630		681	471			416	261			461	378			246	440
337	482		682	471			416.5	636.5			462.5	261			246.333	536.667
337	497.5		683	471			416.5	815			462.5	415			247	742
337	578.5		388	472			417	418			462	728.5			248	396
337	633		389	472			417	628			463	380			248.8	752.2
337.25	692		390	472			417	788			464	536			249	741
339.143	586.071		406	472			417.5	806			466.4	331.4			252	602
338.727	698.727		407	472			419.5	804			465	429			252	628
338	732		408	472			420	815.75			465	572			252.5	715
339	180		409	472			421	480.5			465.667	593.333			253	511
340.429	450.714		410	472			420	619			465.5	753			253	606
340	720		411	472			420.333	779.333			467.2	346.2			255	399
340	734		416	472			423.5	359			469	569			255	517
342	262		417	472			422	440			469.5	798			255.5	541
342.5	416		418	472			422	528			470.5	391			255	598
342	428		421	472			422.8	561.4			471.333	348.667			258	598
342	583		422	472			422	696			471	569			258.5	723
356.955	130.932		423	472			422	799			471	604			259	430
343	437		424	472			424.167	693.833			473	394			260	492
343.5	545.5		425	472			424	566			473	421			260	757
343	605		480	472			424	569.5			473.333	685.667			260	763
343	737		494	472			425.8	463.6			474	534			261	737
344.5	149		559	472			426	683			475	536.5			262	705
346.222	412.889		561	472			426	339			475	625			263	759.5
344	543		645	472			426.5	822			475.333	760.333			265	711
344	549		649	472			427	491			477	338.667			268	271
344	558		680	472			427.333	566.333			476.5	571			269	720
345	157		681	472			427.333	812.333			476.5	575			272.333	442.333
345.667	188		682	472			428	281			477	419.5			272.5	723
345.5	454.5		683	472			428.5	378			478	413			276	651
345	540		684	472			428.667	833.333			479	422			276	726
346.5	592.417		390	473			429	264			480	618			278	447
346	475		391	473			429.5	472			481.5	413			279.333	441.667
346	511		406	473			429	715.5			481.667	428.667			282	725
347	122		407	473			430.667	513.333			481	572.5			282	735
348	482.333		408	473			430	644			481	690			283	767
347.5	540		409	473			431.833	711.667			484	433.25			284	338
350.375	564.938		410	473			431	484			484	570			286	429
348.5	152		411	473			432	718			483	765			286	736
348	458		420	473			433	263			485.333	413.667			286.5	764.5
348	664		421	473			435.429	341.857			487	464			286.5	778
348	671		422	473			434	643			487.5	745			288	290
348	739		423	473			435	604			492.857	415.143			289	734
350	475.889		424	473			437.125	717.375			493.5	568.5			289.8	772.2
349	520		425	473			436	352			491	672.5			293	258
350	353.5		426	473			436	575			492.5	537			294	765
352.4	538.467		472	473			436	644			492.5	675			294.5	767.5
350	595		477	473			437	259			492.5	686			296	420
351	119		558	473			437	568			496	426			301.667	770.333
351.5	156.5		681	473			437.667	629.667			498	416			304	833
353.091	514.864		682	473			438.5	512			498	605			305	807.5
351	570.5		711	473			438.5	683.5			499	567			310.5	335
352	501.5		405	474			439.5	338			499.5	703			314	299
352	523		406	474			439	364			501	427.25			319	583
352	601		420	474			439	642			500	681			320	486
352.333	747.667		421	474			440.5	352.5			500.5	699.5			320	840
353	352		422	474			440	505			502.333	675			323	141
353	360		423	474			440	582			505.4	536.2			324	301
353	406		424	474			440.5	664.5			504	693			327	668
353	439		425	474			440.5	828.5			505	613.5			338	233
355.7	531.95		469	474			443	365			505	697			342.667	796.667
353	588		471	474			441	410			507	437			343.5	235.5
355.5	455.286		472	474			442.667	493.333			507	649			343	800
355.727	475.545		475	474			441	636			508	617			344	627
354.667	487.333		476	474			441.5	734.5			508	731.5			345.5	237
354.5	502		478	474			443.5	367			509.667	419.333			346.5	248
354	571		479	474			443.5	556			509.5	429			346	315
355	751.9		556	474			443.667	687.667			511	431.5			346	772
354	815		557	474			444.5	651			511.5	536			349.5	286.5
358.25	114.125		645	474			445	335			512.5	403			350.75	238.75
355	417		646	474			446	497.75			513	560.75			351.333	308.667
355	508		659	474			445	602			513	608			356	241.333
356.778	652.222		660	474			446.5	345			514	419			359	245
355	731		661	474			446	500			517	333			359	309
356	126		695	474			448.5	594.625			517	433			366.5	505
359.095	559.333		696	474			447	751			519.5	538			370	396
356	571.5		393	475			446.667	877.667			520	436.5			377	443
356	589		451	475			447	379			520.333	452.333			392	283
356	615		470	475			448.667	278.667			521	430			396	769
356	734		471	475			448	452			521.333	649.667			396.5	863
357.6	507.8		472	475			448	678			522	340			397.5	281
357	630		473	475			450.5	263			524	702.25			397	286
357	743.5		474	475			451.5	591			524.8	203.2			401	681
357	808		475	475			452	770			524.5	334			405.333	499.667
358	434		476	475			452.5	576.5			524	391			406	388
359.75	367.75		477	475			452	612			524	401			423	446
359	398.5		478	475			454	436			524.5	562			427	654
359	402		479	475			454	761			529.125	450.125			429.5	447
359.667	424.667		481	475			455	283			527	461.5			429	574
359	483		482	475			456.5	595			527.667	715.333			430	283
359.667	485.333		483	475			455	685			527	820			431	577
359	540.5		555	475			456.5	652			528	206			432	447
360.5	570.5		556	475			457	775.5			528	267			457	412
359	688		643	475			459	489.667			528	402			458.5	368
360.2	728.2		644	475			458.5	694			529	545			465	421
359	825		645	475			458	767			528	688			466	622
360.333	358.667		646	475			459	276			530	462			467.667	618.667
360	364		659	475			459	466			530.333	536.667			472.8	705.8
360.333	371.333		660	475			460	501			531	566.4			475	324
360.667	396.333		694	475			462	265			531.25	723.75			480	410
360	455		695	475			461	486			532	437			496.5	475
361	450.5		449	476			462	619.5			531	559			509	185
361	482.5		450	476			461.25	707.75			532	641			510	361
361	536		469	476			462	422			532.5	646			511	187
361	539.5		470	476			463	358			533	217			514	244
361	550.5		471	476			463	633			533.667	556.333			518	836
361	628.5		472	476			463	802			535	438			535	151
362	388		473	476			464	332			535	643.5			569.5	745.5
362.5	394		474	476			464	397			536.875	570.875			582	864
362	426		475	476			464	533			537	319			592	578
362.6	446.8		476	476			464.75	536.25			537	636			643	176.5
362	458		477	476			465.5	606.5			538	315			654	523
362.5	592.5		478	476			465.5	629			539.5	331			662.5	309
363	109.5		479	476			467	300			541.5	439			676	874.5
363	525		643	476			466	325.5			541	557			684.667	353.333
363	542		644	476			466	620			541	654			699	275
366.375	840.542		647	476			467.5	736			542	286			705	659
363.5	845		648	476			468	327			544.667	681.333			708.333	292.667
366.15	120.45		694	476			468	630			544.5	684			709.5	917
364.75	133.25		429	477			469	756			546.5	466			720	408
364	391		449	477			470.5	471			547	553			789.667	794.333
364	413		450	477			471.2	473.6			547.667	427.667			172.5	481
365.429	490.571		467	477			470	538			547	430			251	312.5
369.115	566.885		468	477			470	618			550	681.333			252	317
364	597.5		469	477			470	710			550	476			253	212
364.5	621		470	477			470	738			550	479			254.5	364.5
364	674		471	477			470.333	769.333			550	563			257	335
364.5	680.5		472	477			474	322.75			552.5	651			258	208
365	394		473	477			473.5	545			551	658			258	339
365	453		474	477			474.5	326			553	442.5			264	324
367.529	456.412		475	477			474.5	610.5			553	564.8			268	297
365.333	545.667		476	477			475	618			553	479			268	319
370.29	851.839		477	477			474	831			554	663			274	318
366.522	554.565		479	477			475.5	386			556	566			276	441
366.5	599		481	477			475.333	731.667			558	661.2			278	320
366	685		642	477			477	611			556.333	679.333			278	322
367	243		646	477			478	457			558.5	571.333			279	330
368.846	352.692		647	477			479.5	275			558	402			287	340
367	397.5		648	477			479	375			558	663			291	445
371.077	410.846		674	477			479	747			560	620			316	293
367.25	416		692	477			481.75	304.25			564	447			320	243
370.673	446.082		693	477			480	602			565	383			324	224
367	447		428	478			480	609			566	490			330	759
368.429	463.286		429	478			480.333	619.333			566	622			335	778
367	481.5		451	478			481.333	262.333			567	420			335	762
367	622.5		454	478			481	544			569	279.333			344.5	300
371.053	114.947		466	478			481.667	611.667			569.429	402.571			344	830
368	137		467	478			482.5	722			571	617			351	249
368.5	248.5		468	478			483.5	635			572	382.5			405.5	229.5
368	467.5		469	478			483	745			573	379			411	926
368	525		470	478			484.5	673			574	400			446	611
369	484		471	478			485.5	276			574	490.75			481	95.5
369	545		472	478			485.5	660.5			573.333	678.667			482	339
369.692	742.615		473	478			486	516			574.333	328			505.5	94
369	753		474	478			487	747			574	415			524.2	157.6
370	337		475	478			488.5	353			575	572			569	872
370	362		476	478			488	543.5			575	630			580	516
370	500		477	478			488	549			576	449			581.333	496.333
370	503		478	478			488	633.5			577	640			582.667	377.333
370	557.5		480	478			488	668			579.25	479			589.286	384.714
375.5	620.056		545	478			489	307			580.625	643.125			605	506
370.5	695		546	478			490.5	449			581	678			613	533
374.435	242.261		547	478			491.5	603			585.6	678.2			616	807
371	459		548	478			491	609			584	688			641	462
371	517.5		671	478			492	347			586	396			644	450
371	523		673	478			493.778	505.889			585	412			646	450
371	525.5		674	478			492.5	572			585	477			649	496
372.273	552.182		691	478			492.5	664			585.833	538.167			660	339
372.364	757.727		692	478			492	773.5			589.667	459.667			665.333	435.333
372	247.5		693	478			493	391			588	554			680	428.5
375.045	500.091		395	479			493	445			589.5	365.5			686	435
373	530		430	479			494	622			589.5	530			691.667	540.667
373.333	637.667		466	479			494	642			591.222	676.556			691.8	547.4
373.25	763.75		467	479			495.143	729.143			590.5	412			696	566
374	107		468	479			494.5	530			590	573.5			696.333	587.333
374	266		469	479			494	545			590	658			699	592
378.083	350.333		470	479			494	651.5			592.5	292			736	469
374	528		471	479			495	665			592	351			737	568
374	642		472	479			495.5	726			592.8	488.8			737	570
374	707.5		473	479			496	766			593	493.5			740.75	555.25
375	415.5		474	479			496	615			593.8	569.4			740.5	572
376	440.5		475	479			496.5	625.5			595.833	464.667			749	503
375	450		476	479			496	661			597.667	483.167			802.8	773.2
375	489.5		477	479			496.5	669			600	567			817	793
376	507.6		478	479			497	459			600	405			829.333	773.667
376	562.1		479	479			497	486			600.5	465			834.571	792.857
375	715.5		543	479			498.8	541.4			600	490.5			844	919
375.857	742.286		544	479			498.5	646			600	531			46.6	820
376	133		545	479			498	733			600	676			50.5	826
376	311.5		667	479			499.5	550			602	527			74	828
376	614		668	479			499.5	612.5			602.5	677			85	694
376	627.5		674	479			500.5	619			603.333	492.333			94.6667	705.667
376	709.5		690	479			500	838.5			604	487			113	650
376	736		691	479			501	625			606	496			118	618
376	758		692	479			502.333	541.333			607.8	540.4			119	563
377.333	108		466	480			502.5	634			607	564			121	496
377.667	487.111		468	480			502.333	714.667			607	631			131	615
382.152	536.109		469	480			503	740			608.5	518			142	724
380.1	546.2		470	480			502.5	743			610	461			162	877
377	553.5		471	480			503.5	449.5			612.5	677			170	527
378	125		472	480			503	470			612	382			171	757
378	464		473	480			503	475			613	626			172.5	628.5
378.5	516		474	480			503.5	651			615	223			175	569
383.258	559.097		475	480			503	767			615.5	454			180	677
378	758		476	480			504.2	775.6			615	467			188	732
379	252		508	480			503.5	799			618	457			195	850
379	373		548	480			505.833	401.333			618.4	470.8			198	790.5
380.059	509.588		549	480			504.5	537			619	468			203	477
379	541		550	480			504.5	589			619	566			204.25	881.25
379.8	692.6		627	480			504	759			620	675			213	867
379	703		642	480			505.5	316			621.5	516			220	801
380	218		651	480			505.5	444			622.333	547.667			222	881
382.588	239.706		652	480			505.5	539.5			621	587			224.5	882
380	353		669	480			505.5	614			622	564			224	898
380	504		677	480			506.75	367.25			623	475			226	898
381	581		678	480			506	449			623	623			229.5	558
380	689		679	480			507.5	617.5			624	675			233.5	899
381	373		689	480			506.5	765			624.5	401.5			234	749
381	613		690	480			508.2	536.2			625	225			236	466
382	253		468	481			507	776			628	472.5			239	621
390.087	499.092		469	481			509	451			627.5	569			240.5	473
382.5	522		470	481			508	519			627	767			241	458
382	653		471	481			508.5	659			629	389			242	654
382.714	662.571		472	481			508.5	778			629.833	557.833			245	900
382.5	674.5		473	481			509	472			629	620			245	646
383	332		543	481			509	517			630	574			245	662.5
383.778	354.778		544	481			509.333	585.333			631	385			246.5	684.5
383.667	372.667		545	481			509.667	636.667			632	381			247	691
383	504		546	481			509.333	650.333			634.25	675.75			250	621.5
385.536	577.464		547	481			509	654			633	481			250	650
383	637.5		548	481			510.8	365.6			633.667	557.667			250	693
383.667	646.333		549	481			510	513			635.5	501.5			251	659
383	669.5		561	481			510	521			636	461			252.5	901
383	672		591	481			510	633			637	693			254	632.333
383	687		651	481			511	726.75			638	401			254.5	680.5
384.25	399.25		652	481			512	526			638.5	617.5			257	662
384	689		677	481			512	576.25			639.5	497			258	902
385	388.5		688	481			511.5	587			640	631			260	903
385	458		434	482			512	461			641	395			261	622
385	507		438	482			512.5	567			642	510			263	650
385	513		439	482			512	729			643	505			265	542
389.92	524.04		440	482			513	458			645.167	465.167			272	706
385	582		465	482			514	477.333			644	669			272.5	905
386	763.5		466	482			513.5	562			648.444	420			276	686
391.468	355.143		467	482			516.5	344			648.25	495.875			276.333	689.333
388.857	445.333		468	482			514.5	473.5			650.5	468.667			276.5	699
386	456		469	482			514	619			649.4	671.2			277.667	628.667
386.5	519.5		470	482			514	629.5			652.5	479			280	889
386.5	530		471	482			515	406			653	495			280	905
386	548.5		534	482			515	436			655.5	224.5			281	416
386.444	568.889		535	482			515	573			655	415			290	666
386	589		540	482			516	266			655	556			290	758
387.75	242		541	482			516	306			656	480			291	680
387.5	662		542	482			516.5	464			666	276			294	651.5
388	254		543	482			517	485			666.667	554.333			296	741
388	346.5		544	482			516.333	570.333			669.667	500.333			308	603
388	565		545	482			517.4	619			672	670.5			324.5	335
388	702		579	482			517.5	313			672	447			341.5	909
390	394.833		580	482			518	263			672	524			342.667	134.333
389	419		658	482			518.833	534.333			675	559.5			345	342
389	519.5		659	482			521.875	433.25			675	408			347	315
391.125	533.312		663	482			520.5	612.667			676	481			357	332
391.5	545.2		686	482			520	511			677.571	502.429			374.5	361.833
389.667	610.333		687	482			520	633			678	669			381	892
389	767.5		688	482			521.5	625			679	482			393	293.5
390.333	224.667		401	483			522.667	371.667			679	778			412	849
390	256		415	483			523	465.714			681.5	503			418	850
390.5	258.5		438	483			522.5	511			683	230			421.5	135
390	345		439	483			523	514			685.667	485.333			427	548
390.571	700.286		440	483			522	560			684.5	507			436	302
391	102		464	483			522.5	579			686.5	668.333			443.5	114
391	214.5		465	483			523	353			686	229			456	908
393.077	233.692		466	483			524	377			688.333	506.333			458	124
391	375		467	483			524.333	784.333			689.2	492.4			467	127
391.667	442.333		468	483			526	382			690	329			475	882.5
391	560		469	483			526	526			691.8	556.4			507.6	540.8
391	572		471	483			527.5	302			691.5	574			510	168
391	579		481	483			527.5	306			695	652			517	710
392	209		488	483			527.5	370.5			696.333	522.667			518	150.5
392.455	245.273		530	483			527	377			699	700			522	582
393.125	253.75		531	483			527.5	431			699	489			524	582
395.968	341.935		532	483			527	497			704	659			526.5	190
392	440		533	483			527	619			706	534.5			575.4	908.2
401.766	462.532		534	483			527	644			707	513			589.5	188.5
392	585		535	483			530.5	381.5			707.333	657.667			592.333	188.667
392	676.5		536	483			529.125	386.875			710	461			611.4	816.4
392	696		537	483			528	451			711.2	657.4			633.2	923.8
393.5	394		538	483			528.5	719			715	381.5			636	923
393	411		539	483			528.5	731			717	422			637.25	925.25
393	465		540	483			528	835			718.2	659.6			639	541
393	536		541	483			529.75	286.25			718	381			640.5	327
393.4	538.8		652	483			529	636			719.75	473.25			640	927
394.667	210.889		653	483			530	364			719	522			641	399
395.875	222.292		654	483			531.833	370.833			719	548			660	668.5
395.2	372.6		657	483			531	482			719.5	553			665.5	317
394.25	377.75		658	483			531	583.75			719	580			665.5	319
395.2	388.4		686	483			531.6	608.4			721.778	353.222			668	323.25
394	398		687	483			530.5	710			721	555			673	328
394.6	444.8		421	484			530.5	783.5			725.5	499.5			695	480
394	473		436	484			531	504			726.5	535			696	485
394.8	577.2		437	484			531	717			727	651.5			721	744
394	677		438	484			532	729.5			727.333	548.667			721.5	746
395	241		439	484			531.5	736			729	533			722.833	369
395.667	295.667		440	484			532	308			731.5	415			725	748
395.857	507.714		449	484			532	378			731	550			729	898
397	625		462	484			532.667	387.667			732.333	411.667			731	834
395	627		463	484			532.333	479.333			732	532			745	829.5
395	752.5		464	484			533	643			735	547			753	492
396	229		465	484			533	678			740.667	739.333			756	725
398.143	362.714		466	484			533	470			741	537			793	520
396.667	498.333		467	484			533	501			743	501			809	895
396.5	513.5		468	484			533	717			744	555			823	697
400.333	531.235		469	484			535.286	358.857			748	739			30	741
396.667	541.333		470	484			534.5	377			750.5	646			38	727
396	589.5		471	484			535.571	380			752.667	644.333			39.3333	723.333
396	594.5		529	484			534	383			758	537			53	770
397	97.5		530	484			534.5	484			759	782			56	756
397	102		532	484			535	366			762.5	608			57.5	764
397.75	197		630	484			535.333	469.667			762	634			86	749
397.667	215.333		631	484			535.5	472			768.5	544.5			88	750
397	239		643	484			536.833	749.333			791	667.5			89	752
399.5	241.929		644	484			537.5	305			802	560			140	765
397	397		652	484			537.5	435.5			251	803			140	767
397.5	447.5		653	484			537	606			272.5	546			144.625	887.25
397.769	475.538		685	484			537	624			441.167	414.167			145	606
397.667	560.333		703	484			537	720			463	510			155	578
397	586.5		418	485			538	289.5			685.333	522.667			158	576
397	617		419	485			538.5	361			115	604			161	579
399.167	203.667		420	485			538.667	371			121.5	655			203.667	506.667
398	228		436	485			538	440			126	678			203.5	712
398	491		448	485			539	449			130.75	663.75			206	591
410.396	501.354		449	485			539.667	469.667			132	667.5			207	703
398	517		459	485			540.286	494			134	672.5			208.5	502.5
398	605.5		468	485			539	569			143	765			212	795
398	634		470	485			539.5	607			147.5	768			219	598
398.5	682		477	485			540	290			149	459			219.333	797.667
399	94.5		528	485			540	368			150	690			221	572
399	231		529	485			541.2	381.6			151.5	769			221	585
400.429	248.714		630	485			541.25	473.625			152	494			242.333	780.333
399.5	254.5		631	485			540.5	501			152.5	687.5			244	852
399	303		632	485			540	648			153.8	485.6			244	894
399	488		634	485			541	717.429			154.667	501.333			246	891
400.333	216.167		635	485			541	414			154.5	771			253.5	893.75
401.167	220.667		636	485			541.8	416.4			156	455			257	761
402.286	232.238		677	485			541	704			156.667	689.333			260.667	760.667
400	332.5		684	485			542.5	682			159	675			262.333	813.333
404.333	562.139		386	486			543.5	262			160	715.5			263	210
400	575		387	486			543	373			160	483			265	465
402.875	579.917		415	486			544	429.5			168.333	705.333			266	851
400.857	586.429		446	486			546.111	300.333			169.5	732			273	379
400.8	629.4		630	486			544.5	791			170	668			275	414
400.333	644.667		631	486			545	257			170	725			280	350
400	774		632	486			546	354.5			171.5	741.5			279	397.5
401.4	227.2		633	486			546	394.5			172	739			294	355
401	295.5		636	486			545.5	401.5			175	715			299	845
402.8	337		647	486			545	469			176.833	568.833			302	486
401	408		677	486			545	683.5			179.5	777			305	414
401	624		678	486			545	793			180.5	528.5			305	855.5
402.5	186		689	486			546	352			181	747			305.5	883.5
402	208		690	486			546	427			181	761			316	525
402.667	341.667		447	487			548.375	498.25			184.5	682.5			317	775
404.2	354.6		476	487			547	306			185.667	549.333			323	878.5
402	636		488	487			547	474			185	623			324	349
403	204		489	487			547	512			187	590.8			329.667	870
403	347		581	487			548.5	292			187.889	770.889			332.5	139
403	453		633	487			548	303			188	672			334.25	877
404.286	550.643		634	487			548.5	400			188	748.286			335	853.5
403	688		645	487			548	402			190	683			339	839
404	224		646	487			548.5	631			191.667	676.5			341	875
404.667	238.167		677	487			548.5	710			192.5	709			343	874
406.81	479.19		678	487			550.143	317.429			192	723			345	810
404	485.5		682	487			549	347			192	755			348.5	375
405	218		683	487			549.333	364.333			194.5	587.5			355	860
406	521.667		699	487			549.5	404			196	558.25			358	884
418.551	102.404		700	487			549.5	681			197.778	666.222			360.5	840
407	187.25		418	488			549	701			195	757			377	244
406	197		421	488			550.5	323			195	772.5			382	587
406	235		422	488			551	615.667			196.833	731.667			387	862
406	337.5		445	488			551	296.5			196	790			394.111	261.111
406	515		480	488			551	358			198.5	632.5			408	108
406	612		487	488			551.5	371.5			198.5	677.5			407	824
407.5	191		503	488			552	406			199	752			411	109
408.429	233.714		632	488			551	508.5			199.5	757			411	878
407	374		633	488			551	523			207	673.333			413	874
407	512		634	488			552	321			206	743			416	133
407	533		635	488			552	398			209.667	716.333			421	793
407	574.5		677	488			552	429			214.5	752			423	871
407	633		678	488			552.5	438			215	695			425.5	873
408	90		681	488			552.5	525			216	712			426	537
408	112		682	488			552.5	662.5			217	734			428.5	986
408	197		698	488			552	796			219	701			433	873
408.25	228.5		417	489			554.714	293.571			219.571	753.857			440.25	874.25
409.25	467.25		418	489			554.286	413.143			219	789			443.75	956.375
408	577		444	489			554.429	496.143			220	763			445	989
409	115		494	489			554.667	396.667			220	902			455.5	867
409	178		499	489			554	434			222.333	567.667			457.5	158
409	618		500	489			554.5	516.5			224.5	372			460	857
409	632.5		501	489			554	689			225.889	697.778			462.8	437.8
409	649		502	489			554	691			224	745			466	203
409	658		631	489			554	716			225	694.5			467	844
410	220		632	489			555.167	733.333			226	691.5			469.143	117.857
411.429	227.071		633	489			554	738			226	756			469	861
410.5	393		634	489			555.5	351.5			227.5	685.5			479	832
411.143	479.429		635	489			556	437			227	708			478	853
410	490		649	489			556	297			229	353			478	862
410.5	572.5		678	489			556.5	393			229	802			479	865
410	652.5		679	489			556.5	410			231	595			481.5	860.5
411	207		680	489			556.5	433			234.667	693.333			487.75	444.75
411.5	245		681	489			557.667	260			234	753			489.875	848.5
412	369		417	490			557.5	405			239	585.5			493.875	996.5
411	647.5		499	490			558	772			239	704			492.5	843
412.5	204		501	490			559	408			240	692			496	839
412	240		632	490			559.5	593.5			240	828			497	855
413.714	381.429		633	490			559	703			241.333	634.667			500	998
412	475		634	490			560	295			241.5	825.5			501.25	846.75
414.273	571.364		678	490			561.2	436.6			243.333	698.667			502.714	350.429
412	627		679	490			560	693			249	675.167			506	837
412.5	660.5		416	491			561.333	299.333			250	664			509	836.5
415.267	178.467		417	491			561	404			250	830			510	839
413	185		422	491			561	407			252.2	388.4			511	755
413.333	222.667		443	491			562.333	431.333			253.333	655.667			511	999
413	362		444	491			561.5	536			254	635			513.5	88
413.667	364.667		445	491			561.5	556			254	638.5			513	828
413	375		496	491			562.5	277			255	626.5			515	833
413	463.5		506	491			562.667	351.667			255.8	703.6			517.833	1000.67
414	477.667		537	491			562.5	355.5			256.5	524.5			523	1001
414	226		618	491			562.5	392			257	436			536	804
414	528.5		633	491			563.5	396			257.667	622.333			536	828
414.5	577		634	491			564.571	405.286			258.6	651.8			539.5	868
414.5	633		645	491			563.5	411.5			258.667	613.333			541.75	418.875
414.5	662.5		678	491			563	698			258	740			556	749
415.333	164.333		679	491			563	719			260	588			558	874
415.5	228		687	491			563	733			261	648			559	163.5
415	233		688	491			566	349.5			262.5	522.5			565	184
417.5	248.136		413	492			565	402			263.75	645.875			567	840
415	374		414	492			565	424			263.333	616.667			598.5	228.333
415	389.5		443	492			566	419			264	730			598.25	836.25
415	523		444	492			567	330			266.286	277.571			600.25	840.25
415	538		483	492			567.4	358.8			268	665			600	558
416	567.2		487	492			567	391			269	791			604.8	227.3
415.333	648.333		631	492			567	398			274	659			603	236
416	369.5		632	492			567.333	642.667			278	657.667			603.5	245.5
416	521		633	492			567	679			279	314			604.286	553.571
416.5	526.5		634	492			567	716			281.625	691.25			607	987
416	546.5		417	493			570.4	338.9			281.5	742.5			661.667	571.333
416	624.5		489	493			571.556	352			282.5	383			669	566
417	96		610	493			569.5	425			282	502			696	746
417.5	116		630	493			569.333	663.333			282	685			721	589
419	362.357		631	493			570	397			284	658			727	737
417.5	380		632	493			570	695			284	561			734	376
417	473		633	493			571	329			290	466			777	548
418	372		634	493			571	390			293	658			832.2	871.6
418	480		635	493			571.8	573.4			293.667	697.333			84.5	664.5
418.786	647.786		636	493			571	649			294	703			87.5	663
419	427.5		682	493			572	691.5			298.5	800			88.75	671.75
420.7	467.7		694	493			571	697			300.167	708.167			89.5	658
419.5	530.5		409	494			572	359			301.5	658.5			91.5	663.5
419	607		410	494			572.333	393.333			302	558			92.3333	659
419.5	700.5		417	494			572.5	619.5			305	696.5			95	681
420	160		418	494			572.5	645			308.5	655.7			97	672
420	480		629	494			573.2	694.2			311.5	855			99	669
420	571		631	494			574.2	307.8			312	384			100	660
420	582		632	494			573	554			312.75	704.25			101	637
420.5	644		633	494			573	596			313	524			101	652
421	182		634	494			573.333	642.333			315.6	656.2			119	701
422.429	559.571		635	494			573	647			315	449			122	593
422	162		636	494			574.5	617			315.6	679.8			124	567.5
422	485		639	494			575	679.5			316.167	685.167			124	575
422.5	625		640	494			576	340			316.667	690.667			124	710
423	117		641	494			576	347			316	694			125	559
423.333	184.333		642	494			576	620			317.4	676.2			125	564
423	550.5		682	494			576.5	676.5			321	657			125.333	570
423	651.5		683	494			578	321.5			322.5	507.5			128	490
423.5	668		694	494			577	335			322	608			128	718.5
424	358.5		410	495			577	556			322	748			131.5	490
424	536		416	495			577	718			322	804			134.6	469.8
424	578		417	495			578	310			323	406			134	713
425	503		418	495			578.5	318			324	658			136.333	700
425	565		438	495			579	619			327.5	803			138	702
426.4	368.9		439	495			578.5	808			329	614			143	714
426.5	456.5		478	495			579.5	626			330	591.5			143	731
426	623		537	495			579.667	693.667			331.2	658.4			151	728
428.125	628.125		544	495			580.5	276			333	757			152.667	738.333
426	665		584	495			580	312			334	825			154	734
427	327		630	495			580.5	324			336	455.25			159.5	727.5
427	502		631	495			580	350			335.333	490.667			160	686
427	578		632	495			580.333	631.333			336	658			165	741
430	116.545		636	495			581.5	262.5			335	663			166.8	679.6
428	361.5		637	495			582	306			336.667	642.667			168.5	479
428	485.5		640	495			581	331			338	736			171	731.5
429.2	539		641	495			582	278			339	381.25			174	728
428	558		642	495			583	348.714			338.667	816.667			173	731
434.591	371.432		656	495			582	374			339	650			173.5	771
430	376.5		678	495			582.5	600			340.5	658			174	442
431	249		682	495			582	626			342	705.5			185	779
432.63	342.185		683	495			583	733.5			343.25	695			190.333	762.667
432	335		373	496			585	292			343.5	676			191	781.667
432.5	521		374	496			584	739.5			344	871.5			192	747
432	563		375	496			585	573.5			345.5	777			195	749
432	572		376	496			586	298			346	475.5			195	760
432.5	709		407	496			586.333	413.667			347	698.5			195.833	771.833
434	106		408	496			586	519			349.143	809.857			196	746
433.75	378.25		416	496			587.5	260.5			349.333	471.333			197	450.5
433	593		417	496			587.5	346			350	695			197	782
435.286	93.1429		449	496			587	531			351.5	701			200.8	744
434.333	163.167		450	496			588	500			358.5	570			201.25	777.75
434.5	562.5		630	496			588.5	519.5			360	791			200	781
435	382		631	496			589.5	310			362	795			202.5	721.5
435	525.5		632	496			589	680			365.143	325.286			202	754.5
435	629.5		633	496			590	375.5			366.333	422.667			202.5	773
438.258	111.484		635	496			590	413.5			366.667	670.333			203	399
436.429	553.857		636	496			591.5	336			369	382			203	735
436	620		637	496			591	475			369	686.5			203	746
437.8	87.6		638	496			591	526			369	826.5			204	609
439.467	89.8		639	496			592.333	531.667			371.5	708			205.5	737.5
437	341.5		640	496			592	567.5			371	728			205	774
438.417	559.5		641	496			593	263			371	771			206	609
437.5	632.5		642	496			594.4	385.4			372.5	415			206	735
438.6	500.4		677	496			594	500			373	665.5			206	806
446.067	528.567		678	496			593.5	517.5			373	683			208	613.667
439.667	98		679	496			594.6	555.4			374.5	384			208	735
440.75	508.6		680	496			593	594			375	425			209	779
439	1028		681	496			594	269			375.5	521.5			210	571
440	119.5		682	496			594.333	415.333			377	456			211	634
442.167	563.333		683	496			594.8	671.6			377	505			212.5	571.5
441	142		373	497			594	712			378.333	488.667			213	635
441	567		374	497			595.5	334			379	670			213.5	775
441.25	606.25		405	497			595.5	574			378	753			214	347
441	626		406	497			595	596			379.75	665.5			216.333	791.667
442.5	105		449	497			595	737			379	743			217	776
442.5	167		485	497			596.333	340.667			379.25	748			217	798
442.5	173.5		627	497			596	394.5			380	384			221	649
442.333	481.333		630	497			596	581			381.5	457.5			223	648
442	516.5		631	497			596	653			381.6	740			224	742
442	559		632	497			598.571	260.571			383	663.5			225.5	792
443	570.5		633	497			597	558			384	510			228	358
442	590		634	497			597	731.5			385	458			229	803
452.829	96.453		635	497			597	776			387.5	476			230	425
443	325.5		636	497			598	349			387.5	617			231	549
443	1039		637	497			598	363			391.5	383.5			233.5	602.5
444	356		638	497			598	375			391	668			235	632.5
444	494		639	497			599	394.667			391.333	670.667			235	640
444	516.5		640	497			598	418			393.5	640			238	634.4
444.333	549.667		641	497			598.5	548			393.5	662			240.667	637.667
444.5	611.5		642	497			598.5	553			393	696			243	595.833
444	623		678	497			599	655.333			394	538.5			244.167	668.833
445.5	369		679	497			598.5	674			394	638			244	660
447.68	560.96		680	497			598	720			395	659			245.5	658.5
447.111	577.556		681	497			600	301			395	727			247	645
445	583		682	497			599	602			396	713			249	650
446	175.5		683	497			600.5	274			397.6	598.8			249.667	653.333
446	366.5		416	498			600	348			398.111	709.111			251.167	663.333
446	373.5		424	498			603	373.667			398	529			251.8	589.4
447.636	507.273		469	498			600	438			399	342			254.6	416
448.222	512.667		470	498			601	390			399	461			254	593
447.833	519.25		471	498			602	397.5			399	768			257.5	382
447	109.5		472	498			601.6	518.8			401	652			259	592
448.5	116.75		473	498			601	653			403.8	767.4			260	840
449	171.364		474	498			602	657			403	566			264	644.5
447.5	377.5		475	498			602	462			405.5	644			268.6	846.8
447.5	523.5		476	498			603.8	269.6			405.5	663.5			270	376
448.5	145		477	498			604	405.667			409	669			272	373
448	151.5		478	498			603	546.5			409	671.5			276	559
448	321		479	498			603	620			413	298			283	437
450	83.6667		480	498			603	638			414	780.833			286.5	861.25
450	103		482	498			604	264.5			416.5	560			287.333	857.667
450	153		488	498			604.5	280			417	665			295	860
452	160.091		537	498			605	365.25			419	527			298	579
456.74	565.429		629	498			604	371			426.857	661.714			300	445
454.308	123.923		630	498			604	498			426.5	756			303.5	864
451	505		631	498			604	670			428	754			306	864
454.158	332		632	498			604.5	751			429	638			310	860
452	338		633	498			605	260			430	808			325	471
452	518		634	498			606	291			431	565			332	460
453	165		635	498			605	674			434.2	658.4			349	586
453.667	583.333		636	498			606	832.25			433	666			356	861
454	113		637	498			606	714			433	671			379.4	570.2
454.75	313.75		638	498			607	288			435.625	747			408	739
455.333	521.111		639	498			607.8	403.4			435	736			409	449
456.385	643.385		640	498			608	547.75			436.5	739			418	749
454.167	647.833		641	498			607	642			437.5	584			440.5	538
455	82.5		657	498			607	750			437	633			449	175.5
455.6	115.6		680	498			608	309			437.333	652.333			456.333	973.667
455	161		682	498			608	370			437	673			458	645.5
458.265	528.647		404	499			608	851			438.2	697.4			466.5	641.5
455.5	533		405	499			610.25	375.75			439	630.333			467	645.5
455	686.5		410	499			609	543			438.333	645.667			482.5	794
456	150.5		411	499			609	593			438	648			526	717
456.6	350.8		415	499			609	714			440	639			539	529
456	358		416	499			610	287			441	755			554	664
456	515		417	499			611.75	370.875			442.5	767			579	109
456	543		468	499			610.8	464.8			444.333	697.833			584	627
456	808		469	499			610	499			444.5	561.5			587	638
464.596	138.33		470	499			610	716			444.5	647			589	653.5
458.5	310.5		471	499			612	337			445	592			597	677
459.056	509.611		472	499			612	385			447	808			606	726
458	540		473	499			612.5	387			448	644			609	187
460.375	110.75		474	499			613	437			449.5	776.75			615	102
459	156		475	499			613.2	516.6			449	767			617	103
459	332		476	499			612	528			451	791.5			642.2	829.6
459	353.5		477	499			613	554			452	617			650.5	872
459.667	607.333		478	499			614.2	409.6			452.333	643.667			669	254.5
459	610		518	499			613.333	584.333			452	761			668	831.5
460	476		537	499			613.5	680.5			455	698			672.6	435.6
463.833	528.875		607	499			613	714			454	805			672	700
460	603		608	499			613	756			456	575			674.333	616.167
463.143	87.7143		627	499			614.667	263.333			456.5	645			673.5	709
461.75	121.25		628	499			614	341			457	368			673	883
462.545	165.182		629	499			614.5	385			460	655			675.8	225
461	512		630	499			614	460			462.667	656.333			677	219
461.167	545.833		631	499			614.5	527			462	765			679	438
461	652		632	499			614	529			463.667	525.333			683	429
462	317		633	499			615.2	833.6			463	732			684	709
462	330		634	499			614.5	839			467.5	776			688.2	219.4
465.75	345.917		635	499			615.667	540.667			470	789			687.5	425
463	95		636	499			615.5	790			475.5	505			728	576
463.667	880		637	499			616	278			479.5	806			732	633
464.333	108		638	499			616.5	525			480.5	769.5			753	571
464	368.5		639	499			616.5	555			481.5	766			763	422
464	380		640	499			616	830.5			486	357			785.75	524.75
464	416		641	499			617.5	273.5			488	352.25			785	857
464.5	512.5		657	499			617.5	562.5			488.333	730.667			787	855.5
465	541.5		658	499			618	826.143			488.5	762			789	556.5
464	570		690	499			619	365			489	664			790	860
465.5	104.5		403	500			618	534			489	835			791	531
465	163		408	500			618.8	542.6			490	760			791	537
465.333	353.333		409	500			618.333	819			493.5	723			805.5	773
467	397.929		410	500			619.5	395			497.333	285.333			52	637
465	646		411	500			620.5	360			499	530			57	633
466.875	110.25		433	500			621	467			501.111	556.667			98	554
466.714	115.857		434	500			622.778	518.222			501	303			98	563
466	314		465	500			621	546			504	784			98.3333	567.333
466.333	523.667		466	500			621.667	814.667			505	321			99	820
485.867	543.413		467	500			623	269.5			505.75	555.75			103.333	815.5
466.5	644		468	500			623.667	431.667			506.5	693			105	820.25
466	721		469	500			623	467			509.5	769			105	825
467	92		470	500			623	471			512	558			112.333	833.667
468.2	358.9		471	500			623.5	538			517	518			113.667	528
467	373		472	500			623	651			518	769.5			113	564
467.5	386		473	500			623.5	656			520	557.5			114	572.5
467.667	611.333		474	500			624	515			520.2	696.4			117.167	827.167
467	639		475	500			624	613			519	748			120	554
469.688	81.375		476	500			625.5	359.5			522	803			122.333	819.333
471.583	100.208		536	500			625	367			524	559			127	826.5
468.333	105.333		537	500			625.333	372.333			526	572			128	557
468	405		626	500			625	553			527	559			128	606
468	881.5		627	500			625	721.5			530.5	860.125			130	827
469.333	140.667		628	500			626.333	309.333			532	343.5			130	847
472.167	144.208		629	500			627.5	471			533	903.5			131.333	561.333
469	373		630	500			627	727			537	414			132.5	575.5
469	390		631	500			628.833	368.667			538.667	570.333			132	825
470.5	393		632	500			629	365			540	925			132	827
469	537.5		633	500			629	383			542.5	550			132	845
470	155		634	500			629.5	396			548	690			134	826
470	533		635	500			629	516			554	746			137.5	548
470.5	562.5		636	500			630.167	593.333			559.5	724			137	829
470	622.5		637	500			629	713			563	760.5			137.5	835.5
471.412	639.412		638	500			630	380			567.5	713			138	520
472.2	89.7		639	500			630	433			568.5	631			141	831.6
472	116.286		640	500			631	550			568.667	863.333			140	639
471	121		651	500			631	320			570	783			140	653
471.571	397.714		652	500			631	554			573	486.5			143	836
472.8	371.6		653	500			632	317			574.667	558.333			145	832
472.5	532.5		657	500			633.25	368.75			574.333	685.667			146.5	518
472	559		658	500			632	411			577	775			147	566
472	577		690	500			632	434			576	566			147	832
474.8	125.867		385	501			632.667	472.667			579.5	635			148	837
475.692	133.308		408	501			632	475			582.5	635.5			149	622
474.429	364.429		409	501			632	687			585	792			149	841
473.714	608.214		410	501			633	301			592.5	779.75			149	843
474.5	575		416	501			633	315			595	638.5			150.5	519
475.75	81.5		462	501			633.5	480			596	784			152	584
475	532		463	501			633	546			598	371			155	582.5
475	734		464	501			633.5	595.5			599.5	556			156	572
476	86.5		465	501			634	408			600.667	501.667			156	851
480.767	113.163		466	501			635	413			604	557			157	574
477.333	137.333		467	501			634	435			605	684			157.8	580.4
476	369		468	501			635.143	464.286			611	509			158	714.5
476	382		469	501			634.5	469			613.286	459			159	836
476	467		470	501			634.5	717.5			613.667	535.333			159	863
476	674		471	501			635	524			616.625	496.25			160	515
477	703.5		472	501			636.5	448.5			619	489			160	844
477	470.5		473	501			636	590			619	522			161	855
477	539.5		474	501			636	830			630.333	649.667			162.5	629
477	592		506	501			636	838			635	694			162	718
478	92		520	501			637.5	367			637	794			163.5	557
478.5	368.5		536	501			637	404			640	467			163	622
478	474		623	501			637.333	494.333			642	644.5			164	712
479	545.409		624	501			638	373.5			647	335			164	721
478.5	582.5		625	501			638	713			652.5	511.5			164	727
479	101		626	501			640.6	336.2			659	572			165	613
479.5	157.5		627	501			639.5	447.5			668.5	730			165	719
479	378		628	501			639	476			669.5	684			165	836
479	459.5		629	501			639	604			681	572			166.4	727.2
479	912.5		630	501			640	306			682	391			167	437
480.667	87.6667		631	501			640	525			689	692			167	592
487.56	91.25		632	501			640	582			694	610			167	718
480	139		633	501			642	416.5			696.4	701.2			167	732
482.889	140.333		634	501			641	480			709	538			170	626.5
480	146		635	501			641	528			713	807			169	678.5
480	537		636	501			642	629			717.333	828.667			169	718
480	637		637	501			642.5	530			726.5	782.5			170	846.25
481	459		638	501			644	301			727.5	584			170.333	682.667
482.125	585		639	501			644.5	339.5			730	715			171	678
481	628		652	501			644	576			730.333	870.667			172.5	730.75
482	104		653	501			645	355			734.143	651.286			172	851
482	127		654	501			645	412			737	759			172.8	862.6
482	136		655	501			645	706			741.714	380.429			173	565
482	146.5		656	501			646	456			745	519.5			173	597
482	370		679	501			646	650			749.333	517.667			174	713
482	423		680	501			648.2	435.6			749	521			174	412
482	500.5		681	501			647	532			751	511			174	570
482	622		682	501			648.5	453			753	511			174	692
486.294	627.882		689	501			649.5	577			753	601			174.333	702.333
482	644.5		690	501			648	710			755	842			175.5	877
482	652.5		416	502			649.5	585			757	512			176	741
484	128.5		417	502			650.5	332			760.5	499.5			177	500
483.5	572		462	502			650	423			763.143	506.429			177	738
484.222	686.444		463	502			651	481.5			763.5	502			178	740
483.667	697		464	502			650	747			766.875	494.75			178.5	743.5
486.143	73.7143		465	502			651	530			767	499			178	746
484	120		466	502			653.5	529.5			768	750			180	602
484.667	143		467	502			654	333.5			786	754			181.333	737.5
485.444	502		468	502			654	562			790	749			181	747.5
484	535		469	502			654	625			794	748			181	750
484.667	596.333		470	502			656	319.25			801.5	759			182	745
485	101		471	502			655.5	443			802	640			184	602
485.667	622.333		472	502			656	385			802	768			184	758
485	694		473	502			657	462			808	685			185	731
486.5	121		521	502			656	590.5			834.5	667			186	733
486	385		612	502			657.667	466			841	784			186	735
486	646		622	502			657	626			859	773			187	420
486.5	697		623	502			658.5	456.5			249.5	450			187	602
487	424		624	502			659	551.333			253	546			188.5	728
487	508		625	502			659	420			398	227.5			188.667	812.667
489.343	558.8		626	502			660	365			409.8	586.6			189	747
489.074	516.037		627	502			660.333	424.333			471	344.5			189	860
488	549.5		628	502			662.25	468.5			475	626			190.5	702
488	566.5		629	502			661	583			672	497			190	815
488	693		630	502			662	595			673	813.5			190.5	875.5
491.81	114.286		631	502			663	366			50	842			190	880
490	120.5		632	502			663.8	423.4			81	833			191	746
489	523		633	502			664.667	456.556			119.667	703.333			193	815
491.6	75.4		634	502			665	460			127	807			194.5	748.5
490	108		635	502			665.5	366			140.3	781.5			195	658
490.333	133.333		636	502			665.5	444			170.3	764.7			196	607
491.2	632.3		637	502			666.5	470.5			172	657.875			196.75	726.5
490	686		652	502			665.5	564			173.667	725.333			196	818
491	130		653	502			665	585			176.5	731			197	736
491.5	522		654	502			665.5	590			177	733.5			198	527
491	550		655	502			665.5	664			179.5	710			199	608
492.833	693.25		656	502			667	369			179	781			199	677
491.6	744.4		680	502			666.8	394.6			179	792			199.667	721.333
492	573		681	502			667.5	408			181	706			199.5	810.5
493	428		405	503			667.8	580.4			182.8	724.4			199	856
494.474	519.316		406	503			668.833	592.667			183.5	763			200	718
493	548		416	503			668	422.5			184.5	785.5			200	749
493.5	580		417	503			668	437.5			185.5	708			200	839
493.667	671.5		463	503			668	465			188.667	709.667			200	844
494	677.333		464	503			668.5	590			193.667	814.333			200	853
496.259	104.481		465	503			669	856			194	775			201	804
494.5	507		466	503			670.5	402			196.25	819.625			201	824
494.333	618.667		467	503			670	459			196	693			203	720.667
495.444	71.3333		468	503			671.5	407			204	819			202	724
495.5	92.5		469	503			671.8	563.6			209	828			202	838
495	123.5		470	503			671	600			216.667	757.667			202	841
495	511		471	503			672	375			219.875	757.875			203	600
495.4	647.2		629	503			672.5	458			221.5	820			203	733
497.2	546.8		630	503			672	596			223	816			204	736.667
496	562		631	503			673.667	415.667			224.5	819			203	790
497	506		632	503			673	432			234.333	821.667			203.5	824
498.2	580.2		633	503			674.5	364			239	861			204	865
497.667	614.333		634	503			675	387			249.125	741.5			204.667	320.667
497	639.5		653	503			675	453			252.5	737.5			204	804
503.971	82.3768		654	503			676.5	503			260	842			204	830
505.65	110.733		655	503			675	771			272.667	720.111			206	607
500.733	124.567		656	503			677.667	374.556			279.333	423.333			206	722
498.8	643.8		679	503			676.5	407			293	932			207	752.667
499	601.5		680	503			676	444			295.333	950.667			208	792.5
500.5	648.7		404	504			676	535			297.5	429			208	811
500	106		405	504			678	410			298.5	698			209	705
500.4	390.2		408	504			677	509			299	875			209	800
500	551		415	504			679.7	353.4			306	828			209	825
500	635		416	504			678.333	370.333			308	745			210	354.5
501	562.5		417	504			678	412			310.6	351.2			210	753
501.5	577		462	504			678.5	437			313.5	369.833			210	791
502.412	604.765		463	504			679.8	601.6			315.5	509.5			211	726
501.3	630.3		464	504			679	800.5			315.5	726			211	731
502	101		465	504			680	357.5			315	869			211.5	761
502	105		466	504			680.333	392.667			320	734			211.5	788.5
502.4	569.8		467	504			680	407			320	856			211.5	802.5
502	987		468	504			681	419			327.875	719.125			212	861.75
503	96		469	504			681	377			330.75	770.625			212	747
504.857	181.857		470	504			682	449			332.8	717			212	749
503	537		558	504			681	752			337	285			213	752.333
503.667	574.333		655	504			683	362			342	838			213	545
503.5	638		656	504			685.3	393.1			344	179			213	731
506.231	99.6154		685	504			683	451			345	765			215.667	710.333
505.25	364		688	504			683	470			347	819			217	751
504.5	429.5		412	505			684.667	458.667			351	754.5			215	805
504	578.5		413	505			684.667	567.333			355.875	755.875			216	754.5
505.4	586.8		414	505			684.5	571			357	804			218	742
508.478	595.13		415	505			684.5	775			358	759.5			219	734
506.6	70.2		416	505			685.875	581.5			360.5	735			219.333	736.333
506.6	115.8		442	505			686.5	487			361	732			220.5	896
506.429	121.286		443	505			688.5	575			363	769			221	738.5
507	131.286		462	505			688.333	804.333			367	368			222	816
506	517.5		463	505			688.667	823.667			369.5	752			223	750
506	530		464	505			689	699			371	762			224	829
506.5	545		465	505			691	360			381	890.75			225	870
506.889	627.889		466	505			692.2	363.8			393.75	798.75			227	531
507	126		467	505			691.5	467.5			403	782.5			227	617
507	211.5		468	505			692.444	575.667			404.857	773			227.5	871
509	547		469	505			692	452			408	642			228.5	830.5
509	585.5		525	505			693	484			408	714			228	873
510	97.5		562	505			692	566			416	292.5			231	312
511.8	63.6		563	505			694	437			417	295			229.333	772.333
516.069	73.7222		565	505			693.667	498.667			420.714	804.143			230	657
511	178		566	505			694	374			420.5	603			230	751
511	430		567	505			694.5	767			423	312			232	660
514	592.786		568	505			695	420			428	770			233	747
513	71		569	505			695.75	422.25			428.5	890			234	666
513	370.5		603	505			695	439			429.5	170			235	734
517.286	555.914		604	505			695	604			430	791			235.25	835.75
514	487		653	505			695	775.5			434.667	776.333			236	663
515	564		654	505			697	583.5			449.5	592			238.6	379.8
517.568	116.784		655	505			696.5	695.5			449	719			237	552
518.286	365.714		656	505			697.5	435			453	268			237	822
516.5	377		657	505			697	601			456	777			237.5	893
516	433		684	505			699.4	456.6			458	216			239	657
516	546		685	505			699	466			461.5	163			239	685
517	589.5		687	505			699.833	418			464.25	766.25			239	751
523.8	85.3111		688	505			699	441			468	741.5			239	823
518	657		689	505			699.667	607.333			472.333	751.333			239	831
519.667	82		713	505			702	414.5			477.5	217			239	847
519	203		391	506			700.6	451.2			480	168			241	345
519.667	590.333		410	506			700	484			487	318			241	608
520	428		411	506			701	696			488.2	733.8			242	676
520.5	586.5		412	506			702	601			488	966			243	835
520	593		413	506			702.167	693.333			498	276			244.5	673
525.841	371.937		414	506			702.5	461.5			500	335			245	287
522.556	550.111		418	506			703.5	465.5			502	708			246.5	834.5
521	573		419	506			703	479			503	755			246	837
522	60		461	506			705	448.25			507	423			248.25	848.25
522	63		462	506			704.5	737			507	536			248	682
523.8	78.4		463	506			706	451			508.571	839.857			249	550
532.423	105.109		464	506			705	491			511.5	715			249	703
522	135		465	506			706	640			510	718			250.833	747.333
522	385.5		466	506			707	500			515	236			250	345
522	651.5		467	506			708	438			519.5	339			250	677
523.8	69.8		562	506			709	594			522	707			250	893
523.333	96.3333		563	506			709.5	679			525	341			251.333	698.667
523	383		564	506			709	731			527	319			253	683
523.667	559.333		565	506			710	440.5			528	651			253	697
523.5	583		566	506			710	496			529	847			254.6	831.2
526.273	356.909		568	506			711	450			531	383			257.25	851.75
524.5	528		569	506			713	589.5			533	387			258.5	625
528.45	554.75		602	506			712	610			533	945			258	701
525	183		603	506			712	633			536.5	538			259	667
525	596.5		604	506			712	739			539	632			259.667	820.667
526.5	80.5		652	506			714	509			540	994			259	833
527.714	97		653	506			715.6	571.8			541.5	299.5			260	856
526	402.5		654	506			715.25	609			542	297			261	851
527	562.5		655	506			716	436.5			544	293			261	869
526.5	565		656	506			717.333	423.333			544.5	388			263	497
526	571		657	506			717	455			549.333	292.167			263.75	871
526.8	573.6		685	506			717	593.5			554	449			264.667	653.667
535.159	68.8537		686	506			718.5	427.5			559	488			265.5	867.5
527.5	77.5		687	506			719	434			559	506			265	895
534.286	87.3286		688	506			719.5	574			583.5	281			267	839
527	647		409	507			719	638			583.5	284			267	851
528	186		410	507			721	576			583	861			267	895.5
528	402		411	507			722	440.5			587	208			268	628
528	583		412	507			722	456			589.714	692.429			268	842
528	588.5		417	507			722.5	628			592	349			270	364
528	600		461	507			725.556	576.667			593.5	275.5			271	401
530.545	54.4545		462	507			724	583			599	425			271	884
529.5	63		475	507			725	440.5			605	576			273.5	814.5
529.909	537		488	507			725	502			609	379			273	882
529	634		489	507			725.5	587			614	477			274	654
530	583.5		562	507			725.5	609			619	813			275	441
530	601.5		564	507			726	424			625.167	693.833			275	845
531.5	370		565	507			726	432			625	187			276	396
532	416.429		566	507			726.5	453			625.5	306			277	401
532	374		567	507			726	583.5			625	524			277	410
532	468		568	507			728	509.5			630.5	704.5			277	889
533.6	134.8		570	507			729.5	437			633.444	453			278	626
533	181		571	507			729	505			633.5	198			278	845
533	558		572	507			729	586			634	835			280.5	884.5
533.625	566.375		611	507			729	602			635	748			281.5	854.5
534.667	537		619	507			730	836			636	210			282.5	560
534	652		652	507			730	453			636	960			283.5	340
537.125	54		653	507			730	514			637.5	214			283	628
537.667	136.833		654	507			731	504			638	451			283	850.5
558.509	120.027		655	507			731.5	597			642	797			284	833
538.079	180.158		656	507			732.5	437			643	216			285	691
541.639	128.278		657	507			733.4	641.8			643	218.5			286	368
537.5	392		658	507			733.667	462.667			646	211			286.5	885.5
538	102		686	507			734	501			651	196			287	823
538	660		687	507			736.25	449.25			652	193			289	258
539	59		688	507			736.5	559			653.5	210			290	890
539	728		708	507			735	582			653.5	283			291	879
541	731.857		709	507			737	489			657	701.5			292	865.5
541.417	87.5		409	508			738.143	555.714			658.25	190.75			292.5	873
540.5	106.5		410	508			737.5	596.5			658	951			292.333	884.333
541.5	174.5		411	508			737	601			660.5	181.5			294	890.5
542	57		412	508			739.3	626.6			661.5	463			296	887.75
542	112		413	508			738	447			662.5	206			296	876
545.72	51		416	508			738	477			663	216			299	282
543.875	108		474	508			738	630			663	189			299	839
543	170		475	508			738	661			663	366			299	878
543.5	483.5		476	508			739.8	562.2			665.429	695.714			299	887
543	532.5		562	508			739	599			667	191			302.667	874.667
543.333	670.667		563	508			739.833	606.167			668.833	202			305.333	873.667
544.5	114.5		564	508			740	488			669	827			308	266
544.6	179.2		565	508			740	676			670	194.5			308	356
544.889	183.667		566	508			742	533			672	976.5			309	203
545.25	373.625		567	508			742	644			674	918			309	877.5
544.5	541		619	508			743.5	588			675.5	743			309.5	896
550.891	549.764		651	508			744	457.5			678.286	687.857			310	577
545	71		652	508			744	530			680	202.75			311.333	764.667
545.667	167.5		653	508			746.5	451.5			684.5	245			313	873
554.061	75.8611		654	508			745	644			686	235			316.5	492
547	142		655	508			746	535			688.25	206.75			317.5	874
547.2	466.6		656	508			747.4	537.6			689.5	632			320	516
548.333	534.333		657	508			746	656.5			693	634			321	869
547.667	585.333		658	508			748	521			698.333	247.333			323.667	871.333
547.5	588.5		685	508			748	625			700.5	768			327	853
547.667	605		686	508			749	649			702.5	313			328	851
548.333	65		687	508			749	542			704.5	273			329.5	251.5
552.486	112.757		376	509			749	633.5			705	727.5			330	683
548	125		408	509			751	455			708	728.25			333.4	899.6
549.5	101.5		410	509			751.75	538			713	722			333.667	874.333
549.75	374		411	509			751.167	551.167			718	323.5			335	885
551.538	494.923		412	509			751.5	620			719	417			337	344
550.5	56.5		415	509			751	656			719.5	942.5			338	457
551.2	134.2		562	509			752.5	507			726	444			338	905
552.773	540.909		563	509			752.333	558.333			728	362.5			340	218
551	61		564	509			752	719			728	436.5			344	824
551.4	97.4		565	509			753	556			729	777			344	882
558.74	525.46		566	509			753	647			730.5	745.5			345	391
552.5	153.5		567	509			754	570			733.5	502			345.333	704.667
552	381		590	509			755	508			735.5	498			348.5	870
553.333	99		619	509			755.4	555.8			738.5	716			350	251
553	369		650	509			756.167	650			742	383			350	861.5
554.167	523.833		651	509			757	492			745	381.5			351	126
554.765	533.647		652	509			757	558			745.667	483.667			352	903
553.5	559		653	509			757	573			747	859			354	782
553	562		654	509			757.5	583			753.333	439.667			362	890
553	605		655	509			757.667	642.333			755.5	705.5			363	300
556	53.1667		656	509			757	778			757	548			363.8	398.6
555.5	453		657	509			758	534			758.5	541			363	570
557.2	73.8		658	509			759.5	488			759.5	413.5			363.333	902.667
557	554		659	509			759.5	495.5			759	456			367	400
556.75	560		685	509			759.5	597			761	663			367	726
558.643	67.4286		686	509			760.5	492			767	604.25			367	847
557	564		693	509			761.286	584.429			781	556			369	880
558.667	144		399	510			760	612			785	578.5			370	399
560.13	538.167		411	510			760.5	615.5			789.5	556			371	868
561.4	358.667		562	510			760	700			802	606			373	866
559.4	528.8		564	510			761	546			133.857	536.714			374	860.5
559	594		565	510			761.333	594			143	541.5			375	767
560	91		566	510			762	598			162	691			375	873
560	225		649	510			766.143	496.286			165	616			377	905.5
566.871	472.657		651	510			764.5	591			165.5	825			378	864
561	549		652	510			764.5	625			170	821.667			380	906
561.667	553.667		653	510			764.5	671			173	713.625			386	468
561	612		654	510			765.333	490.333			176.688	658.625			387.5	871
572.072	59.0633		655	510			765	543.5			177	823.5			389	298
564	605.857		656	510			765	547			178	555			389	874
563	155		657	510			765.5	557.5			179.5	663			394	575
564.5	366.833		658	510			765	580			180	902.5			395	819
565.25	134.75		659	510			766.6	485.2			183	652			396	579
566.107	143.857		660	510			766	517			183.5	731			397.5	406
564	186		661	510			766.5	519.5			185.5	663.5			398	920
566.286	458.357		662	510			766	609			191.667	698.697			399	629
564.5	477.5		697	510			766	620			185.8	728.6			402	288
565.2	551.6		399	511			768	533.25			187.5	683.5			402	407.5
566.8	153.08		407	511			767.5	667			188.667	659.333			403.75	882
565.5	183.5		408	511			767	712			189.875	675.25			405	855
565.333	492.333		435	511			767.5	784			188.5	744.5			406	853
565.6	612.8		561	511			768	525			190.5	723			407	858
566.333	193.333		563	511			768	549			191	670			408	836
566	430		657	511			769.5	508.5			196.038	754.885			409	286
566.5	618		658	511			770	574.4			196.318	737.227			409	861
567.5	415.5		659	511			770.5	550			195.583	681.417			412	855
567	537		660	511			770.5	571			194	719.5			414.5	871
568	556		411	512			770	585			197	673			417	411
568	469.5		469	512			770	661			199	713			417.333	868.333
570.467	527.033		470	512			770	664			199	732.5			417	882
569.412	545.529		478	512			772	599			199.333	708.667			421	410
569.333	122.333		500	512			771.333	656.333			200	685			419	851
571.5	423.083		560	512			772.5	527			202.273	677.727			420	91
570	551		561	512			772	552			203	742			422	883
570.5	568.5		562	512			773.429	727.429			203.667	704.333			428.667	877.333
570	129		563	512			772	731			203	711.5			429	851
571.125	146.75		574	512			773	521			204	686			435	877
570	501		417	513			773	556			207.333	709			442	911
570.75	575		418	513			773	637			207.667	697.333			443	875
571.5	138.5		476	513			773	647.5			209.636	685.909			444	911
571.5	389.5		477	513			773	652.5			208	827.5			448.5	874
571.333	435		478	513			774.5	517.5			212	682			454	165
571.25	613		479	513			775	629			213	722			458	853
572.5	114.5		514	513			774	644.5			213.667	761.333			464	215
572	129		562	513			775.5	595.5			215.357	681.714			464.5	906
579.565	127.457		416	514			775.5	672			216.154	690.615			466	649
576.571	138.071		417	514			776.25	639.75			216.5	749.5			468	172.5
572.667	333.333		418	514			777	720			220.167	711.611			468	907
572	482		475	514			779	564			218	725			469	876
575.417	380		476	514			779	724			219	512			473	173
573	401		477	514			781.6	643.2			220.6	685.9			475	757
573	404		478	514			780	655			221.25	680			482	279
574.286	576.857		479	514			782	583			220	726			488	166.5
583.588	99.6182		513	514			784	584			221	767			494.5	911.5
575.5	116.833		514	514			785.5	538			227.111	769.889			495	907
574	123.5		529	514			787.429	587.857			229.778	740.111			505	280
574.5	456		530	514			785	594			230.5	734			506	372
574	468		552	514			786	658.333			234	690.118			511	607
575.5	92.5		553	514			788.5	571			231.333	707.333			540	912
575	107		554	514			788.5	592.5			231.333	802.667			551	300
575.5	372		555	514			789	661			233	701			556	798
580	406.389		556	514			790	582.5			233	779			565	188
575	426		557	514			790	631.5			236	778			566	440
575.625	583.75		558	514			792.5	667			237.8	769.6			567.5	167
576	123		559	514			792	591			240.75	684			567.5	192.5
576.5	196.5		560	514			792	674			243.571	749.929			573.167	841.167
576.667	438.667		474	515			793	602			244.286	682.286			575.667	243.333
580.099	456.282		475	515			794.5	577			243.5	704			610	911
576	473.5		476	515			794	664			248.5	484.5			611.5	341.5
585.693	489.4		552	515			795	592			249.667	767.333			612	704
577.125	533.125		555	515			797.667	564.667			253	756.286			613.4	363.2
577.6	102.6		567	515			797	652			254.4	499			614	478.5
577.333	279.333		389	516			798	659			263.8	574.6			614	742
577.667	368.667		390	516			798	719			274	786			615	734.5
577	391		409	516			800	606.667			305.667	779.333			618.5	782
577	416		474	516			799	685.5			305.5	967.5			620	904
577	426.5		517	516			800.25	740.75			308	765.385			625	817.667
577	449		555	516			801	749.6			307	776.75			625	601
577	536.5		556	516			800.333	655.333			308	658			635	909
577	600		567	516			800	664			310	979			647.5	907
578	34		568	516			801	679			312	625			649	210
578	79		569	516			803	682.5			314	976			650	908
580.571	80.2857		570	516			803	591			318	766.5			666	360
579	199		571	516			804	574.5			323	474.5			666	595
579	379		618	516			804	641			329	745			667	554
579	420		622	516			804	658			331.316	751.421			668	539
579	515		636	516			804	698			334	629			669.75	900
579.5	526.5		673	516			805	632			351.083	477.417			670.75	904
581.75	536.167		388	517			805	655			353.5	636			672.5	890
580	101		389	517			806	642			356	636			673	914
582.833	280		390	517			807	646			361.667	662.333			676.5	909
580	405		394	517			808	589			364	576			681	180
580.333	431.333		496	517			808.571	652.286			365.8	778.6			688.667	456.667
580	517.5		497	517			809.667	632.333			367	615			689.333	884.667
580.5	541.5		540	517			810	732.667			369.4	637.6			692	827
583.9	61.5		553	517			810.875	585.875			372	662.5			692	921
581	521		554	517			811	678			380.71	620.258			693	886.5
581.5	616.5		555	517			812	637			380.75	443.625			693.8	911.6
581.333	952.667		566	517			812	680			380.5	776			701	432
582.8	162.6		567	517			813	610			381.941	437.647			704	442
582	193		568	517			814	646.333			382.5	640			705	832
583.2	254.2		569	517			813.5	713			381.5	407.5			706.833	913.667
588.653	502.245		570	517			815	598			387	409			708	810.5
584.714	113.714		618	517			815	604			395.5	644			711	577
583	526		696	517			815	607			398.333	410.667			711	915
585.714	26.8571		496	518			815.5	630			397.5	417			713	873
585.222	138.333		499	518			815.5	640.5			405.667	796.333			714	579
584	143		500	518			815.5	715			407	687.444			719	404
585.938	415.938		512	518			817.25	625			408	695			719.667	910.333
584	429		551	518			816.333	677.333			411	414			721.667	906.333
584.4	522.8		552	518			816.333	686.667			411.8	637.6			728.333	588.333
587.32	529.56		553	518			819	681.556			415.333	830.667			731.25	435.75
584	540		554	518			817	694			418	416			732.5	910
585.4	148.8		555	518			817	746			424.933	418.2			734.833	431.333
585	159		566	518			818	684			425.364	423.091			733	928
586.1	436.1		567	518			821.375	635			429.5	827			735	536
613.053	49.3645		568	518			821	609			430	428			740.5	912
596.263	125.963		570	518			823	639.75			430	750			743.25	908.75
587.625	159.125		571	518			822.667	643.333			432.667	821.333			745.5	912
586	256		578	518			823.5	612			436.8	825.6			745	921
591.167	403.241		641	518			824.5	665			440	799			754.2	378.6
587.913	514.261		458	519			826	627.833			489.5	630.5			754	905
587	134		459	519			827.5	642			495.5	632			781	821
587.667	383.667		466	519			827.5	658			504.5	619			785	549
588	79.5		467	519			828	669			518	794			792	489
588	278		468	519			828.5	716.5			550.833	406.75			803.667	840.333
588	283		479	519			829	709			574.2	935.7			804	727
597.072	52.0725		498	519			829.5	756			581	429			812	787
589.333	134		499	519			831	648.667			652	431			813	934
589.5	202		510	519			830.8	667.4			666.5	925.333			822	653
589	247		511	519			831	691.75			667.2	921.4			88	580
589	272		512	519			830	694.5			668.857	916.286			110	637
589	388.5		568	519			831	655			110.5	884			114.75	896.75
589.667	417.667		570	519			832.5	646			147.167	554.167			116	623
589.8	459.8		384	520			832.5	661			147.5	459			122	628
591.167	113.167		386	520			833	704			169	891			135	573
590	180.5		388	520			833.5	716			186	626			138	477
591.5	207		389	520			835	655			199.8	777.6			141	515
590	392		390	520			835.833	663.5			203.5	776			155	520
592.44	81.24		391	520			837	656			220	449			156	462
592.75	465.333		458	520			838	654			286	505			159	632
594.9	475.483		464	520			838.667	667.333			322	524			165.6	634.4
593.375	553.125		465	520			839	692			448	610			168.5	523
593	203		466	520			839.5	697			586.5	553			169	517.5
593.5	240.5		467	520			840	688			616	433.75			174	539
593	296		468	520			842.5	657			638.5	456			176.667	539.333
594	376.2		478	520			178	698.625			642	735			179	672
593.5	408.5		568	520			180	663			651.667	629.333			182	674
593	426		570	520			183	702			695	566			190	563
599.021	198.042		636	520			186	642.167			699.2	857.4			192.333	624
594	211		637	520			188.5	712			699.5	569			194	533
594.5	457.5		384	521			191	692.5			714.111	577.667			194	609
594	468		385	521			194	636			715.5	591			196	610.5
597	60.5556		386	521			195.5	633			722.5	577			197.5	564
595	152		389	521			195	710			768	514			199	561
596.2	249.7		390	521			202	704			774.5	518			205	659
598.556	261.222		438	521			202	757			777.667	517.333			209	535
595	384		462	521			205	661			780	507.5			209	639
596	87		463	521			206	651			53	625			213	637
597.824	105.882		464	521			206.6	657.8			69.1667	592.167			214	556
596	149		465	521			208	665			117	750.25			217	639
596	440		466	521			208	757			122	746			218	528
597.889	459.889		469	521			216	625			123	711.5			218	567
596.5	492.5		470	521			220	689			135.143	608.143			221	588
599.077	93		536	521			221.75	770.75			136.667	563.667			221	637
598	88		570	521			221	773			137	611			221.333	754.667
598	217.5		571	521			221.5	779.5			147	799			223	668
598	231		460	522			222	727			154	716			224	613
599.5	256.714		461	522			224	721			157.5	720			226	388
602.45	399.75		462	522			224	762			167	424			227	569
606.418	266.557		463	522			225.5	708			171	474			234	604
601.8	138.8		464	522			225	728			172	589			235	574
605.513	175.59		465	522			225.5	741.5			176.333	813.667			238	572
611.627	210.782		469	522			225	782			186	588			248	640
600.333	241.333		476	522			226.667	714.333			191	692			251	646
600	375		560	522			226	775.5			191.5	808			252	276
618.665	77.03		566	522			228.167	745.333			199	474			254	286
601.5	184.5		567	522			230	783			202.667	298.333			254	500
602.667	230		681	522			233	778.5			203.333	728.667			254	666
601.333	410.333		380	523			236	684			206.5	729			255	597
601.444	604.778		445	523			237.143	707.714			207	676			258.333	707.333
606.848	143.543		446	523			237.833	790.333			208	289			266	651
603	235		449	523			237	690			208	701			266	687
603	490		450	523			237	798			214	679			267	548
604	87		451	523			238	613			215.5	276.5			271	612
604	254		453	523			238.5	774			218.5	318			276	537
604	277		454	523			238.5	778			218	490			276	601
604.333	373.333		455	523			244	665.5			218.5	727			282	537
604.5	427		459	523			243	773			219.75	274.5			283	614
605	539.5		460	523			244	728			221.2	729.4			285	737
605.5	163.5		461	523			246.167	671.667			221	271			290	637
605	431.5		462	523			245	790			221	278			301.5	301.5
607.125	132.75		463	523			246	795			224.5	303.5			310.8	596
606	276		464	523			248	756.778			225	276			313	658
607.857	182.429		465	523			248	784			226.5	278			316	265
608.636	187		535	523			249	774			225.5	307			320	617
608	46		536	523			250	790			225.5	755			320	659
609.684	82.2105		537	523			251	757			231	265.6			326	653
608.5	112		559	523			252.333	589.667			230.5	268.5			328	746
608	127		560	523			253.143	656.571			232	409			328	810
608.571	163.286		565	523			256	641			233.5	278			331	256
608	247.5		682	523			255.5	645			237.167	447.833			336	297
608.5	351		690	523			255	737			237	405			360	524
611.9	367.25		704	523			256	756			242	788.333			362	129
620.22	384.098		705	523			256.333	802.333			242	624			364	527
610	391		733	523			258.8	724.2			242	764			365	140
611	111		734	523			258	760.5			242	793			384	862
611.25	133		446	524			259	756			245	694			386	863
615.8	407.95		447	524			261	732.5			247	691			395	627
613.1	117.6		448	524			262	752			252	450			397	128
612.5	127		449	524			262.714	723			254	376			405	817
613.737	150.211		450	524			262.5	772			257	813.5			410	887
612.5	167.5		451	524			265.333	351			258.5	764			418	147
615	186.643		452	524			266.667	723.667			266	376			424	804
612.5	328.5		453	524			266.667	732.333			268	410			426	123
613	122		454	524			266	792			270	379			431.333	440.667
613.333	336.333		455	524			267.5	755			272	434			435.667	199.333
614	650		456	524			268	619			272	873			437.5	915
614.5	338.5		457	524			268	729			273	418			442.5	907.5
615.75	386.25		458	524			268.667	742.667			275	398			457	329
616.2	135.4		459	524			270	617			277	537			460	693
618.9	169.68		460	524			270	726			279.75	579.75			462	278
615	468		461	524			271	729.5			280	507			464	894
616	124		462	524			272	343			280	719			480.6	964.4
616.75	189.5		463	524			272.5	612.5			285	450.5			487	863
624.048	134.157		464	524			273	320.5			285	710			488	952
617.5	200.5		536	524			275	323.5			286	708			489	968
619.875	332.208		537	524			274	687			289	406			494	797
619.538	465.462		538	524			274	692			296.5	567			497	326
623.88	147.3		539	524			274	816			300.5	769			498	968
618	197		559	524			276.333	344.333			302	290			509.333	584.667
623	112.238		673	524			278	677			302	373			509	969
620.2	123.2		704	524			280.857	343.714			307.5	338			511	898
622.071	224.286		705	524			279.5	582			308	775			511	970
619	230		706	524			282	354			310	605			527	806
619	327		449	525			283	301			310.5	699			531.333	352.667
638.452	181.569		450	525			284	332			310	703			534.167	348
622.333	794.556		451	525			284.5	624			311.667	332.667			538	354
624.2	85.5333		452	525			284	774.5			313.5	697			557.5	665.5
624.833	103.333		453	525			285	366			313	699			568	968
622	131		454	525			285	574			314	610			577.667	767.333
623.111	213.778		455	525			286.556	362.556			315	710			583	644
628.946	320.054		456	525			286	581			317	536			583	976
623	339.5		457	525			286.333	585.667			317	334			584	979
624	401.048		458	525			286	598			320.5	347			598	654
623	354		459	525			286.5	780			322	613			599.667	475.667
624	151		460	525			287.8	570.6			323.5	342.5			600	526
625.5	175.714		461	525			287	588			324.5	795			604.5	415
624	207.5		462	525			289	578.8			325	368			604	555.5
624	314		463	525			289	664			326	637			607.8	179.8
624	347		464	525			290.6	295.8			326	724			608.5	556
624.5	359		477	525			290	560			327.5	533			609	975
627.167	150.667		534	525			290.5	623			329	318			612	588
627.654	202.615		535	525			291	577			330	546			621	128
628.4	213.9		536	525			291	669			330	344			626.667	510.333
628.5	90		537	525			292.5	301.5			331.5	538			630.6	217.8
629.5	153.5		538	525			292	560			332	400			631	226
640.97	333.099		539	525			292.5	666			335.667	572.333			663	607
628.143	353.429		540	525			293	642			336	350			663	609.5
627.75	361.875		563	525			294.5	595			337.5	537			671	316
628.111	389.333		676	525			294	603.5			340	385			684	868
627	461		677	525			294	654			340.5	387			687.5	727
628.667	167		678	525			295	671			340.5	768			693	814
628	210		734	525			297	560			341	399			699.5	356
629.5	345		394	526			296.667	715.667			341.5	702.5			702	355
630	76		395	526			297.333	295.667			342	349.5			710	679
630.826	369.435		450	526			297	538			343.5	771			716.833	325
630.5	95.5		451	526			298.2	554.6			347	771			722	746
632	115.125		452	526			300.125	549.125			349.8	494.4			748	585
633.562	203.562		453	526			299.6	725.2			348.333	527.667			762	574
631.333	352		454	526			301	710			350.75	550			767	644
631	684		455	526			301	837			350	357			767.8	805.6
631	865		456	526			303	344			350	777.5			775	777
636.576	102.848		457	526			303	784			350.5	789.5			783	567
633.714	155.857		458	526			304.75	273.25			351.5	793			784	794
635.286	212.571		459	526			304.5	653			352.333	564.667			790.5	608.5
635.368	355.895		460	526			304	674			352.667	620.333			794	610
634.5	207.5		461	526			305.5	651			352.5	785			835.5	735.5
635	26		533	526			305.4	668.8			353	568			80	640
635	59		534	526			305.833	720.833			354	543			96	660
637.727	83.8182		535	526			307.429	835.714			354	579			99.6667	635.667
635.8	95.6		536	526			307	682			356	547			101	624
636.833	119.833		537	526			308.667	268.667			357	699			104.333	639
647.082	105.51		538	526			308	667.5			358.7	706.9			104	664
636	136.5		539	526			308	685.5			357.714	739			108	575
637.333	333.333		540	526			309	307			360.5	389			112	664
637	373.5		710	526			311.25	303.75			360.5	557			113	676
645.926	66.9506		451	527			310.5	620			363.5	536			115	642.333
640.897	168.69		452	527			310	713			365.5	575.5			115	677
641.37	197.759		453	527			310	845			366.667	579.333			120.5	667
639.833	261.083		454	527			311.5	269			369.333	493			128.5	789.5
639	282.833		455	527			311	362			369.4	389.2			129.8	550.6
639	136		456	527			313.5	272			369	717			131.4	791.8
640.5	146.75		457	527			312	707.5			370.5	719.5			135	703
639.667	157		458	527			313.5	840.5			372.8	722.2			142	801.5
639	256		459	527			315.833	369.333			373.5	541.5			147.5	729
639.5	456		460	527			314.5	678			372	861			156	731
640	78		532	527			315	270			374	774			157	785
648.841	123.707		533	527			316	691			376.5	577			158.5	462
640.5	150.5		534	527			317	272			375	765			159	786
640.333	287		535	527			317	338			376	726			161	635
642	92		536	527			317	619			379	547			165.4	447.6
642.5	289.5		537	527			317	697.5			379	780			164	793
647.033	51.1333		538	527			318.5	351			380	752			167	748
650.086	299.686		539	527			319	764			383.2	775.4			171	787
645	320.6		540	527			319.5	849			384	718			175	790
648.188	40		541	527			321.25	285.25			384	772			177	755
646	47		669	527			320	374			387.5	774.5			186	546
646.5	296.5		737	527			321.5	512.125			388	554			187	789
647.5	292.5		454	528			320	586			390	474			190	690.5
650.1	277.7		455	528			322	341			392.8	719.6			192	673
651.333	75.7333		456	528			323.7	849.9			394	492.667			202	709
649.5	132		457	528			324	328.25			395	801			203	637
673.12	116.065		509	528			323	517			404	882			204	660
649.5	195.5		521	528			324	310.5			405	762			205	749
651.571	156.714		522	528			325	503			406.5	563.5			224.5	620.5
651.5	271		532	528			325.5	518			407	438			224	671
651	325.5		533	528			326.5	770.5			410.5	436			226	595
661.745	71.4255		534	528			327	309			411	718			228.667	302.333
654.091	180		535	528			327	851			412	490			231	734
653	245.5		536	528			329.5	272			413.667	752.667			243	833.5
652.4	339.4		537	528			329	309			413.333	829.667			244.5	341
652.25	389		538	528			329.5	345			419.25	728			250	727
653	215		539	528			330	666			433.5	671			250	837
654.5	60.5		540	528			330.5	844			443.5	755			260	815
661.242	342.484		736	528			330.5	847			445.667	573.333			261.75	818.5
655.667	352		737	528			331.5	865.5			445	669			263	825.5
656	54		760	528			331.5	510			452	446			277	705
663.5	52.5		761	528			331	566			452.5	797.5			281.5	844.5
662.6	204.6		762	528			332.5	371			455.5	796			294	774.5
656.5	875		456	529			332.5	739			459.5	574			301	238
659.375	154.875		457	529			332	742			459	756			318	732
663.079	44.0789		531	529			333	286			467	701			327	704
659.364	111.545		532	529			333.5	337			473.2	293.4			328	844
659.8	185.4		533	529			333.5	570			480	574			330.5	846.5
662.949	162.821		534	529			335	862.25			482	290			337	734
663.824	175.824		535	529			335.667	374.833			486	735			341.5	252.5
660	311.5		536	529			338.1	683.5			492	828.5			343	794
661.667	326.333		537	529			335	847			494	743			352	439
660.5	388.5		538	529			338.5	384.5			499.5	862.5			367	860
661.667	247		539	529			337	722			499.8	691.6			371	878
662	293		540	529			340	380			499.5	783			373	922
661	348		562	529			338	532			499	859.5			373	214
663.2	210.4		610	529			338	823			500.5	869			374.667	212.333
667.729	306.833		737	529			339.667	292.667			501.667	884.333			374	954
664	404		501	530			339	320			504.75	709.875			378.5	595
667	330.667		502	530			339	325			505	296			378.8	880.6
665.5	276.5		531	530			339.5	492			506	668.5			381	597
669.05	143.25		532	530			340	323			507	297			387	808
667.429	324.714		533	530			340	377			507.5	787			417	974
674.455	312.582		534	530			340	568			508	675			427	982
672.038	102.808		535	530			342	529			510	684			428.5	922
669.333	160		536	530			342.5	288			511	740			429.333	720.667
670.75	163.375		537	530			342.5	567.5			514.2	686.4			439	923
669	260.5		538	530			342	589			517.667	688.333			445.8	924.2
670.2	381.2		539	530			343	359			523.5	407.5			447.5	738
669	594		540	530			343	482			525	808			448	904
670	281		609	530			344.5	309			527	695			449.667	791.333
671.167	388.833		610	530			344.5	495			536	407			456	949
671	188		736	530			346	499			535.5	727			477	870
675.385	249.205		394	531			344	585			541.5	408			482	852
671	320		395	531			345	569			542.143	707.429			489	997.5
672.286	342.286		532	531			346	330			547.667	711.333			490	978
672.562	348.188		533	531			348	280			547.75	783.25			495	998
678.583	60.9792		534	531			347	298			548	400			496	1000
676.594	233.375		535	531			347	348.5			550.667	484.333			500	1000
673	272		536	531			347	389			558	717			504.833	124.833
675.5	158.333		537	531			348	282			559	790			510	945
674	178.5		538	531			348.667	531.333			561.333	473.667			513	650
674	270		608	531			348	596			561.5	719			518	647
675.25	353		626	531			349	342			564	477			524	734
676.75	224.625		739	531			349	688			565	719			528	447.5
677.19	387.429		740	531			349	748.5			607	452			544	685
685.434	174.632		462	532			350	290.5			607	823			573	119.5
685.736	201.769		463	532			350	498.5			615.2	453.4			595	248
677	59		467	532			351	609.333			619	628			606	459
677	71		468	532			350.5	635			628.5	508			613	142
679.429	196.786		483	532			350	840			628	672			618.5	745
677.5	317.5		484	532			352.2	351.4			647	651			618	748
678.556	407.778		525	532			351	663			675	516			619	755
678	193		526	532			352	415.5			678.833	529			621	236
679	590		527	532			352.5	502.5			679	360			624	234.333
680	218		532	532			353	600.167			683	516			623.5	400
680	339		533	532			352	832.5			700	345			641.25	190.75
683.837	368.959		534	532			353.5	799			710.667	352.333			654.5	800.5
684.913	388		535	532			354.25	808.25			719	408			664	326.5
682.909	395.909		536	532			354	366			739.125	485.875			670	821.2
682.5	260.5		537	532			354	465			762	601			671	817
683.778	311.667		538	532			354.5	496.5			792	669.833			674	817
685	62		539	532			354	690			816.5	773			677	818
685.952	116.095		601	532			355	282			52	656			678	452
685.062	129.5		629	532			355	389			79.5	655			685.167	450
683.333	186		387	533			355	499			93	662			710	285
685.545	225		461	533			356	772			94.5	672			736.667	729.333
685.731	355		462	533			356	355.5			95.5	658.5			744	512
684	215		463	533			356	387			101.5	760			754.5	933
684.333	342		464	533			356	804			103.2	755.6			759.5	438
686.56	572.28		465	533			357.714	831.429			110.75	659			762	439
684.333	590.5		467	533			357.5	617.5			118.2	739			764	593.5
692.524	130.595		484	533			360.167	346.667			118	663			764.5	934
686.579	581.737		485	533			358	755			120	630			766.333	937.333
687.6	181.8		486	533			360	290			120.833	633			778	590
693.092	295.158		523	533			361	504.25			122.25	637.25			785.833	598
687	589		525	533			360.667	604.333			128	762.75			797	598
688	285		526	533			360	630			128	759			799.5	605
688	338		534	533			361.333	524.667			131.333	663.667			816	593
689.5	123.5		535	533			361	834			133	767			819	840
690.167	379		536	533			362	364			136	659			822.5	631
691	184		537	533			362	626			136.667	770.333
692	203.25		538	533			362	857			149.5	781
692.167	565.667		539	533			362.333	860.667			159.5	782
695	97.6		599	533			363	510			162.2	793.4
692.5	180.5		600	533			363	571			168	787
712.649	513.21		607	533			363.5	593			172.5	759
694	88		650	533			363	607			174.5	789.5
694	200		651	533			363	618			180.8	787.4
695	86		366	534			363	633			182.5	785
702.444	96.4444		383	534			364	695.25			187.286	665.571
696.769	116.385		462	534			364	524			190.286	785.571
696.143	172.714		463	534			364	575			194	715
695	186		464	534			365	626.5			196	712
697.5	204.3		465	534			364	629.5			204.833	588.333
700.125	255.417		471	534			364	726			206.5	535.5
705.049	164.971		484	534			365	335			206.5	593.5
699	83		485	534			365.5	362			210.333	582.667
700.5	145.5		523	534			365	750			235	678
704.481	292.593		536	534			366	347			243.5	783
699	354		538	534			366	588			266.5	589
702.333	360		597	534			366	621			279.5	845
700.333	375		598	534			368.5	443.5			285	853
701	113		599	534			368	580			288.333	677.667
703	109.5		604	534			368.333	852.667			291.333	852.667
704.095	333.571		605	534			369	529			293	824
709.531	112.969		606	534			369	626			293.5	849.5
705.5	114.5		607	534			369	654			330.25	465.25
704	261		608	534			370	694.5			343	630
708.533	220.133		609	534			370	363			344	633
710.882	265		649	534			370	628			359.75	645.75
711.579	329.526		650	534			370.667	701.333			363.6	644.8
712.059	335.706		651	534			371.2	748.4			365	554
711.5	82.5		451	535			371.5	337			382.5	553.5
715.407	238.667		465	535			371.667	614.667			383	551
713.889	311.778		466	535			371.5	622			393	626.5
712	365		467	535			372	290			394.667	573.333
713	153		468	535			373.2	294.8			398	435
717.575	252.05		469	535			372.5	353			398.333	438.667
713.5	306.5		485	535			372.5	560.5			400	680
722.308	473.692		486	535			372.667	627.667			405	595
716	487		534	535			373	837			406.5	633
725.179	132.286		596	535			375.1	339.6			418	540
717.667	316		597	535			374	557			425	652
719	79		598	535			374	621			426	644.25
720.5	76.5		599	535			375	286			428.75	646.75
721.417	314.167		600	535			375.5	335.5			435.5	319.5
723.333	229		602	535			377	744.5			437.111	441.778
733.774	223.674		603	535			379	467			436.333	733.667
726.25	305.75		604	535			381	356			442	642
727.545	221.818		605	535			380	850			450.5	664
731	289.25		606	535			381	766			451	444
730	172		607	535			381	841			451	714
735.033	278.833		608	535			382	292			463.25	445.25
734	158		609	535			383	640			474.2	443.8
735	115		648	535			384.75	336			477	630
737.308	163.385		649	535			385	559			484	356
736	158		650	535			386.5	688			484	358
738	461.375		694	535			387.8	474.2			487.5	356
737	526		695	535			386	589			490	406
738	155		465	536			386	617			492	453
740	142		466	536			387.5	469			495	448.5
740	525		467	536			387	725			495	787
744.526	258.763		468	536			389	575			496.5	459
742.5	157.5		469	536			390	630			500.75	420.75
743	186		470	536			391	614			501	414
180	424		471	536			392	303			501	790
180	570		532	536			393	570			507.9	634
181	573		596	536			394	518			509.5	333
181.5	653.5		597	536			394	616			514.833	639.333
184	464		598	536			397	526			516.714	305.714
184.667	653.333		599	536			398	293.5			518	642
184	657.5		600	536			399	518			524	804
184	671		601	536			401	778			527.5	642
184	673		602	536			402	344			527.8	656.6
185	579		603	536			404.667	718.667			549	620
185	581		604	536			405.5	471			553.5	259.5
186.6	589.4		605	536			406	776			566	484
187.846	598.538		606	536			407.5	823			577	655
186.857	631.714		607	536			408	644			610.5	860.333
186	661		608	536			409	298			644	673
186.333	710.667		609	536			409	628			649.5	672.5
187	656		610	536			410	466			652	677
187.5	714		622	536			411	632			656.2	678.4
188	646.5		628	536			411.25	719.5			658	464
189	678.5		629	536			411.667	683.667			685	690
189.5	693		630	536			412	503			735	700
189.375	698.5		649	536			412	676			736	670
190	607		650	536			413	815			740	668
190	609.5		651	536			414	683			751.5	697.5
191	613		652	536			415.5	428			766	707
191.5	630.5		653	536			415	484			769.5	709.5
191	637		659	536			415	635			784.5	641
191	687.5		671	536			415.5	715.5			789	648
191	720		433	537			415	719			793.5	801
192	619		434	537			415.4	723.2			798	650
192	644		465	537			415.5	726.5			799	652.5
192	654		466	537			415.333	802.667			800	656
192	722.5		467	537			416	462.5			822	609
194.95	609.6		468	537			417	679			845	674
193	684.5		469	537			418.5	441			852	718
193	696		470	537			419	433.5			104	659
193	725		471	537			419.667	619.333			226	912
194	735		472	537			422	389.4			232	505
201.053	627.14		476	537			420.667	439.333			234	738
197	647		517	537			420	503			235	474.5
197	652		539	537			421.5	436			240	522
198	618		595	537			421	443			240.5	526
198	660		597	537			421.333	798.333			245	512
199.6	605.9		598	537			422.5	686			247	477.5
199	637		601	537			422	808.5			257	531
216.444	592.921		602	537			423	356			260	524
202	745		603	537			424.889	379.333			260	541
204	621.5		604	537			424.667	638.667			262	541
204	757		605	537			424	776			265.667	526.333
205.667	610.667		606	537			425	385			265.667	529.333
205	618		607	537			425	440			265	544
205.667	722.333		608	537			426	478			267.429	550.143
206.667	613.667		609	537			426	618			267	553
206.25	621.5		610	537			426	669			269.25	527.25
206	626		611	537			427.333	383.667			273	554
206.333	759.667		628	537			427.5	824			275	562
207	776		629	537			429.333	554.667			278.75	535.25
209.571	722.857		630	537			429.333	648.333			278.5	795
209	592		631	537			430.2	748.4			283.286	568.857
209	634		635	537			429	811			286	573.5
209	735		636	537			429.833	829.167			286	418.5
210	417.5		649	537			431.333	365.889			287.333	546.333
210.778	575.889		650	537			431	356			290.667	544.333
212	585.5		651	537			431.5	557			294.5	413
212	589.5		652	537			431.5	822.5			298.333	546.667
212.75	691.5		653	537			432	777			303.5	590
212.333	763		657	537			432	814			309.5	382.5
213	677		658	537			434	711			309	554.5
213	726		659	537			434.5	385.5			309	591
214	714.5		406	538			434.333	812.667			311	388.25
214	721		466	538			435	604			311	604
214	738		471	538			436	672			312	380.5
215	695		472	538			436.875	810			314.75	511
216	742		473	538			437.5	307			314	611
216	755		474	538			437	394			319	284
216	774		475	538			438.75	819.875			321.5	382
217	702		476	538			439.25	486			321.5	569.5
217	708.5		595	538			439.5	714.5			325	369
217.5	769.5		603	538			440	588			324	386
218	599		604	538			440	683			325.6	674.8
218	716		605	538			440	822			329.857	620.286
219	718		606	538			441.5	370			332.5	365
221.143	513.714		607	538			441	555			349.6	853.8
220	687		608	538			441.333	628.667			353.8	730.2
220.333	722.667		609	538			443.5	563.5			359.2	349.6
221.5	725.5		610	538			443	557			365.5	341.5
222.4	751		642	538			444	431			373	338.5
222	605.5		643	538			444.6	552.6			375	857
222.4	762.6		646	538			445	306			376.667	336.333
222	767		650	538			445.333	806.333			380.667	693.333
222	778.5		651	538			447	379			386	702.875
222	786		652	538			447	850			386	335
222	812		653	538			448.5	306			393	585
223	722		654	538			448	328			400	324
223	789.5		655	538			448	671			401.167	708.833
225	608.25		656	538			449	308			404.4	447.4
224	766		405	539			450	673			407.333	312.667
224.9	797.6		452	539			450	679			408.5	666.5
224	801		605	539			450	718.5			410.5	670
225	725		606	539			451	305			413	679.5
225	755		607	539			452	389			415	592
226.444	778.333		608	539			452.5	490			418.5	680
225.333	808.5		609	539			452.75	564.75			419	609
225	814		610	539			452	573			419.429	693.143
226	764		642	539			452	592			423	296
226	781		645	539			452	728			425	595
226	803		650	539			455.25	572.25			426.5	689
227	635		651	539			454	634			430	697
227.333	830		652	539			455.5	593			431	719
228	574		653	539			455	642.5			432	597
228	787		654	539			457	425			433.667	650.333
228	822		655	539			457.5	577			435	633
230	572		656	539			457	716			436	288
230.5	591		466	540			457.5	783			436	291
230.333	829		628	540			458	416			440	593
231	635		645	540			458.667	571.667			440	633
231	838		649	540			458.333	644.333			448	658.833
232	255.5		650	540			458	814			452	629
232	266		651	540			460	730.75			456	553
237.644	578.831		652	540			459.5	811.5			460	275
233.5	569.5		653	540			463	469			467	669
233.667	589.167		654	540			464	475			468.5	494
233	599.5		655	540			464	655			472	499
233	740.5		656	540			464.5	770.5			474	503
234	251		658	540			465.5	467			476	510.5
234	735		664	540			465	797			481.5	511
236.857	229.571		677	540			466.333	613.667			537	269
236.455	372.727		727	540			467.5	478			542.5	268
236	227		728	540			467	710			545.5	267
236.818	234.727		645	541			469.2	491.4			548	790
236.5	239		646	541			468	632			550.5	267
236	249		647	541			469	314			553.667	274.333
236	588		648	541			470	628.5			561	283
236.333	624.667		649	541			472.5	554			628.667	591.333
236.5	641		650	541			471.5	638.5			749	397
236	777		651	541			471	429			751	406
240.133	250.4		652	541			471	473			756	409
237	268		653	541			472.5	625			756	396.5
237	598		654	541			473	466			757	413
239	260.5		655	541			473	745.5			758	422
239	268		656	541			474	488
239	719.5		657	541			475.5	330
239.5	730.5		658	541			475	478
239	761		659	541			475	659
241	227.167		660	541			476	471
240	244.5		661	541			477	328
240	378		662	541			478	473
240	558		663	541			480	571
240.25	567.5		664	541			481	332
240	722		727	541			481	411
240	725.5		476	542			481	724
241.286	772.286		482	542			482	629
241.8	221.4		568	542			484.25	320.25
241.333	238		645	542			483.5	336
463.863	292.635		646	542			484	310
242	231		647	542			484	527
242	233		648	542			484	571
244.889	561.611		649	542			484	695
250.885	570.846		650	542			486.5	310
242	731		651	542			487	327.2
242	776		652	542			487	732
243	273		653	542			488	346
243.667	723.333		654	542			488	354
244	207		655	542			489.2	553.6
244	212.5		656	542			489.5	310.5
244.5	217		657	542			490	434
244	379		658	542			491.667	348.667
245	203		659	542			491.333	423.667
245.333	228.5		660	542			491	731
245	559		661	542			492	315
245	771		662	542			492.25	437.25
246	234		663	542			494	315
246.5	271.1		365	543			496.833	311.667
248.333	276.6		366	543			495.667	437.667
246	548		367	543			497.5	316
250.176	187.824		369	543			497.667	342.667
248.5	209		460	543			497	618
252.467	548.867		483	543			497	633
248	590		643	543			499.714	702.429
248	711		644	543			498	863
248	740		645	543			500	329
249.5	267		646	543			500	577
249	375		647	543			500	706
250.571	379.571		648	543			502	326
249.5	383		649	543			502	697
249	548.5		650	543			503	318
253.4	385.733		651	543			503.667	688.333
251	546		652	543			505	344.5
251	595.5		653	543			505	570
251	688		654	543			505.5	353
251	708		655	543			506.5	316.5
251.5	763.5		656	543			506	322.5
252	565		657	543			506	474
255	561.111		658	543			511	481
253	588		659	543			511.5	568.5
253	649		660	543			512	706
253	766		661	543			512.833	857.833
255.857	278.857		662	543			514	323.5
254	389		684	543			514.5	804.5
254	580		685	543			515	369
254	637		686	543			517	569.333
255.167	692		482	544			517	339
256.286	767.286		487	544			518	345
258.842	392.105		642	544			518.333	859.333
256	556.5		643	544			519	330
256	685.5		644	544			519	515
257.667	213.667		645	544			519	555
258	176		646	544			522	316
258	230.5		647	544			521.5	820
258	236		648	544			522	764
258	545.5		649	544			523	269
259	211		650	544			524	339
261.375	539.312		651	544			524.5	684
260	291		652	544			525	353.5
[truncated: 502,383+ more rows]
