# Supplementary material for: Spinal lumbar dI2 interneurons contribute to stability of bipedal stepping
Source: eLife. 2021 Aug 16;10:e62001. doi: 10.7554/eLife.62001 (PMC8448531; doi:10.7554/eLife.62001)
Supplement: Figure 5—source data 1. — The X/Y coordinates of dI2 synapses, ipsi premotor neurons (pre-MNs), commissural pre-MNs, and contralateral dI2 at the sciatic level; dI2 synapses and ipsi pre-MNs at the brachial level (Figure 5). [file elife-62001-fig5-data1.xlsx]

## Sheet: Sheet1
dI2 synapses				Lumbar Ipsi Pre-MNs				Lumbar commisural Pre-MNs				Lumbar ccontralateral dI2				dI2 synapses				Brachial Ipsi Pre-MNs
Sciatic				Sciatic				Sciatic				Sciatic				Brachial				Brachial
x	y			x	y			x	y			x	y			x	y			x	y
50.5	630.5			384.121	617.379			708.51	711.357			420.629	617.258			336.5	589			323.153	653.443
69	733			424.15	685.932			726.045	752.511			513.28	781.76			337	612			337.151	754.434
84	704			438.669	576.935			742.311	780.622			585.931	784.655			340.4	615			347.216	678
88	640.5			458.509	524.472			733.087	728.87			568.079	695.403			340	603			412.074	756.598
94	584			463.892	620.108			753.812	672.852			564.818	723.034			341	587			420.691	712.574
120	792			468.841	501.522			769.366	746.966			597.577	619.738			346.5	608			451.677	693.496
122	790			470.683	589.634			793.981	751.873			626.574	654.523			350.25	602.375			454.473	509.4
167.2	770			496.637	648.309			558.284	803.986			629.407	743.494			349.333	617.667			491.844	595.174
180	814			529.971	675.241			713.967	823.209			644.681	658.549			356	616.5			481.719	681.766
190	584			536.036	527.691			728.26	745.752			596.765	854.294			357.286	619.857			493.38	664.945
294	240			589.727	589.545			777.741	700.27			608.301	806.491			358.5	602			518.416	650.364
300	280			590.322	794.983			778.484	681.31			620.71	742.315			361.667	621.667			517.084	727.287
398	229			598.414	678.495			804.685	757.268			635.103	803.592			375.333	616.667			514.5	435.5
430	726			606.929	536.429			842.229	678.08			660.667	642.236			376	613.5			560.056	528.062
449	713			635.984	711.71			677.784	771.294			660.5	832			378	619			560.698	680.177
478	178.5			633.25	499.216			721.66	718.701			668.417	764.167			381.5	606.5			575.951	646.185
494.5	773			651.763	547.203			762.66	780.386			705.727	814.273			381.714	624.143			573.308	476.615
541.5	326			654.588	508.118			775.557	585.115			715.624	715.009			408.714	644.857			598.026	606.259
561.8	660.6			694.968	760.449			799.841	832.083			557.738	873.119			413.4	643.4			299.492	602.675
563.2	657.6			771.163	589.535			849.769	801.59			579.056	756.171			412	650.5			298.571	580.19
567.5	662			393.051	759.313			687.01	755.044			592.549	840.82			414	652			312.036	561.116
576.5	830			497.196	700.542			756.423	801.324			591.22	866.263			419.333	644.333			316.848	446.727
594.5	622			500.768	670.297			753.366	785.591			606.342	818.19			435	653			322.39	526.864
595	625.75			523.589	491.552			775.853	769.87			621.235	793.296			441.5	674			332.787	583.66
595	641			541.833	698.767			793.855	789.886			636.577	627.963			462.5	688.5			339.447	532.613
598.778	644.889			551.178	592.896			798.552	683.034			641.597	657.961			464	691			332.359	619.719
607.429	611			557.228	795.794			826.503	773.034			653.046	763.911			467.5	694			357.959	600.608
608.5	660			571.118	469.609			703.167	787.603			665.043	636.574			484.5	706			370.228	576.191
633.667	195			570.223	685.426			715.781	781.248			695.288	604.575			489	708			365.167	545.167
663	783			679.317	550.341			743.489	783.743			714.788	715.566			523	743.5			374.953	693.453
671	771			726.079	536.048			770.683	771.867			552.573	689.339			540.5	548.5			394.841	642.617
680.6	662			472.227	545.557			785.567	798.433			606.722	843.439			564.5	791			385.412	538.074
688	586			478.185	655.667			786.536	716.679			604.204	805.482			567.5	792			403.058	769.527
687	674			479.706	704.706			746.719	759.372			613.321	710.066			572	794			399.119	742.288
689.5	628.5			502.677	521.14			759.636	731.066			635.617	820.028			577.5	797			400.207	584.362
701.6	658.4			515.058	699.953			761.032	593.513			643.432	780.141			582.5	805			432.973	715.812
703	635.333			516.495	766.714			759.875	705.917			566.733	700.833			605	831.25			421.815	504.55
704.5	664.5			528.824	502.408			787.963	797.762			587.113	770.637			659	423			426.514	753.914
706.5	636			527.795	607.831			789.075	673.857			606.951	809.322			162.5	628			428.711	529.079
706.5	669			547.101	712.212			802.015	779.838			626.937	810.528			169.111	629.444			428.969	607.5
707.5	653			548.443	476.693			819.936	737.377			629.801	774.555			185.5	451			437.728	485.649
709	628			546.036	731.893			731.5	573.975			650.465	816.454			210	627			440.5	861.064
715	647			608.961	501.24			775.098	800.589			661.716	853.938			219	625			450.23	538.518
720.429	626.857			613.893	538.661			796.408	787.329			669.777	789.245			339.167	662.167			449.05	655.075
720	651			642.444	519.988			810.569	776.097			598.053	823.828			422.25	671.75			457.943	574.743
726.667	637.667			646.346	625.769			830.228	794.88			610.291	781.402			443.5	531			462.771	627.386
727	645			658.227	600.716			833.345	759.825			623.315	824.315			443	621			470.723	537.028
733.7	650.4			657.657	627.8							644.53	705.522			447.5	624.5			469.96	596
735.333	639.667			423.343	567.522							634.158	850.228			449.75	605.75			474.556	716.765
741.5	640.167			437.186	714.114							642.079	758.868			450.556	600.778			487.306	558.755
741.667	654.333			443.169	611.847							661.803	705.465			451.333	568.333			485.254	533.373
742.5	630.5			449.07	547.13							661	825.5			451.8	612.4			496.683	601.228
747	676			450.937	788.252							684.771	745.521			457.5	631			536.656	569.878
774	751			488.027	757.491							647.625	818.357			466.2	513.8			534.745	665.909
803.25	873			516.278	645.667							652.731	782.369			466	637			564.4	606.385
123	853			560.987	518.641							684.837	829.232			470	509.5			280.337	649.17
134	623			562.64	733.32							687.382	852.049			476	550			408.248	413.429
139	865			574.185	585.217							703.575	770.421			477.5	592.5			446.304	439.611
165	704			634.661	565.22							565.278	839.204			479.75	635.125			497.728	494.457
167.5	805			665.053	812.998							585.332	793.674			478	596			521.062	648.13
168.5	667			644.451	632.765							592.333	827.018			481.5	561.5			325.044	661.811
174	860			648.931	584.097							614.856	781.209			481.5	566.5			404.605	629.214
202.333	752.333			391.117	554.95							615.66	672.472			486	621			402.857	565.235
212	622			419.736	758.718							622.597	845.247			487.667	563.833			425.603	527.655
229.5	787			439.173	548.465							622.293	810.827			488	600.5			428.109	740.516
230.5	429			433.782	737.741							653.515	758.474			488.6	607.8			452.557	642.17
234	318			467.371	562.876							661.952	820.883			492.2	587.3			447.524	545.429
244	599			462.976	679.695							710.25	646.647			496	581.5			448.818	585.773
246.286	781.429			479.559	654.721							433.348	655.587			99.6667	805.889			455.859	695.331
251.5	860			498.149	735.354							556.108	713.185			101	728.286			419.42	500.907
254.667	877.333			505.821	561.205							569.048	728.741			119	684			413.863	693.55
266.4	651.2			513.582	513.091							598.781	709.31			182.5	884			455.278	462.102
279	257			523.532	629.34							604.644	849.378			215.5	386.875			458.481	626.75
293	581			556.143	595.792							609.603	664.449			291.5	581			483.163	419.793
298	462			569.889	541.848							631.121	568.43			301.7	736.2			492.69	587.987
304	250			573.909	598.455							627.923	665.615			362.5	863			501.253	444.563
327.25	773.75			575.843	562.7							630.762	725.048			402.5	500.5			548.049	808.078
329	889			591.788	660.615							520.308	808.308			407	1059.5			539.608	468.186
332	559			598.173	460.76							578.332	828.629			422	657			574.077	640.702
344	489			618.75	569.812							562.195	745.459			455.833	51.8333			357.435	531.87
344.333	521.667			624.963	553.37							613.8	733.35			522.25	674.75			386.314	465.618
352.5	770			630.885	706.846							630.573	733.278			539	112.5			392.703	622.946
363	232			633.947	531.553							630.425	856.5			546.5	172			410.467	536.72
380	867			632.643	718.357							657.778	742.667			553	731			425.751	586.91
388	328			658.114	572.029							643.785	709.306			554.2	735.3			421.455	562.727
395.5	823			660.778	618.984							675.775	706.483			556.5	739.5			483.895	654.211
396.5	795			803.343	752.086							722.01	766.294			565	229			454.713	547.457
402	330.5			424.559	478.414							594.4	784.64			568	595			455.424	460.026
408	795			435.943	546.579							599.038	828.712			571.333	589.333			469.393	581.126
414	266			433.92	511.28							606.376	838.022			575.333	585.333			482.94	475.706
422	296			453.045	665.193							617.294	743.595			598	482			475.206	747.481
433	819			459.701	519.857							628.878	799.293			629.857	871.857			474.807	419.239
440	671			470.055	468.189							628.406	782.047			631	38			504.261	610.808
451	698			460.8	617.543							656.077	799.606			662	704			494.878	580.857
471.2	223.6			464.466	596.959							640.667	646.167			665.5	683			521.522	536.647
470	532			474.344	614.555							652.313	820.886			667.714	677.571			517.72	559.988
514	498			484.07	605.69							664.45	730.737			670.8	695.6			513.091	573.636
523	593			512.646	601.598							527.292	749.349			669	681			518.762	508.667
552	487			542.22	565.642							549.344	716.812			691.2	64			533.309	504.799
562.667	866.667			554.139	541.667							576	745.6			726.5	843			557.75	612.311
599	279			565.777	554.041							607.434	791.429			77.5	644			543.447	684.421
615.8	806.6			563.716	486.511							621.093	773.739			131.333	685.667			559.344	520.474
635	782			572.882	485.265							628.331	731.79			140.5	684			557.139	475.892
646.5	779			584.037	504.22							637.393	669.464			152.125	697.125			552.5	499.632
664.333	590.667			587.633	656.967							650.583	792.188			160.125	705.125			578.833	471.804
690	790.5			585.112	605.539							570.138	810.65			177	532			597	534.894
696	732			597.176	474.486							585.349	780.535			194.857	524.286			396.499	593.265
711	770			617.985	728.992							604.417	727.333			216.5	719.333			414.75	455.227
716	770			609.469	481.906							633.471	769.078			243	711			449.304	499.983
735	746			635.519	526.329							655.185	798.662			441.5	736			476.699	532.324
739.857	748.857			652.878	785.852							648.059	736.053			447	543			534.764	680.17
746	733.5			657.806	744.7							677.438	695.344			447	557.5			689.412	750.152
747	750			704.221	553.753							677.028	716.676			450.5	571			283.142	547.612
752.333	724.667			776.571	622.367							574.697	788.152			455.5	604.5			289.5	525.994
767.667	771.667			323.524	670.177							583.818	774.4			459	600.5			312.085	496.864
769	738			336.495	741.527							612.689	807.5			460	597			328.411	600.49
776	747			383.309	648.16							678.126	745.866			474.4	491.2			369.1	516.798
793.5	807			417.076	609.045											476	599			355.992	564.415
803.5	821			428.385	702.793											484.5	594.5			374.712	641.435
854	881.5			429.591	719.448											486	612			363.384	457.109
21.5	758			418.515	548.303											492	526			378.32	686.389
72	735			434.359	505.481											494.889	721.889			393.094	565.245
73.5	615.5			435.913	602.026											496	527			394.008	594.411
73	803			452.054	674.496											497.333	596.111			411.867	471.117
84	694			463.331	543.208											500.8	719.4			448.827	699.636
120	505			465.641	510.068											509	536.5			412.245	435.459
133	930			497.893	654.478											515	541.5			421.399	595.173
183.5	939			529.19	505.943											515.667	710.667			410.674	715.391
280	943			611.183	734.768											527	692			414.426	488.519
380.5	931			547.074	598.444											531.5	687.667			423.099	516.243
467	927			559.6	648.8											534.8	683.6			423.473	628.717
511.429	714.857			569.372	627											538.667	686.889			434.057	478.421
565	719			603.272	484.174											539.667	679.889			432.515	388.823
618.5	720			606.044	546.604											551	684			454.468	550.987
624.2	562.8			610.832	771.474											561.333	681.333			463.474	600.624
624.667	559.667			643.685	495.537											562.5	677.5			465.833	474.172
629	562			686.063	640.315											569	668			466.097	508.5
638.5	678			741	655.576											582.5	664			482.093	544.357
640	601			755.014	559.873											588	663			484.833	450.618
642	674			787.333	621.333											621.2	652			494.129	566.123
643	537			483.039	537.99											326	609			495.612	620.217
648.75	607.25			496.912	618.248											400	686			517.187	691.214
657	608.5			527.288	515.05											407.5	809			500.856	661.613
661.2	653.6			535.61	643.993											568	691			502.326	480.922
664	659			546.01	616.466											581	698			502.933	761.883
665	678			538.208	630.083											583.5	885			507.744	529.331
665	680.5			565.966	528.782											592	838			517.174	740.29
668.5	654			559.108	663.622											592.5	827			531.629	426.91
671.143	675.286			566.852	573.741											593	850			537.009	485.55
671.125	656.125			566.808	691.596											598	442			544.472	644.22
674.5	659.25			604.064	734.882											600	451			567.731	520.957
682	641			600.472	560.577											601	823			574.132	629.163
682.5	686			629.264	673.427											602.333	485.333			574.278	600.75
687.833	696			637.286	488.204											602	820.5			582.315	440.5
690.4	685.4			684.643	450.476											604	458			589.251	491.432
692	692.7			699.504	558.872											604.75	489			583.897	367.608
692	630			706.455	503.019											604	506			604.88	415.979
692.333	702.333			724.218	479.891											607	497			641.211	569.237
693.167	712.333			734.233	688.907											608	503.5			657.697	705.676
693	684			423.989	701.978											611.333	579.667			358.876	689.228
701	694.25			425.802	678.397											612	536.5			310.622	436
715	711			426.04	598.452											613.143	553.429			317.154	607.923
756.5	589.5			437.746	580.556											612	568			337.22	625.77
97.5	804			470.312	572.441											612.5	574			337.066	465.519
219.5	828			477.625	626.143											613	542.5			362.37	583.056
248.5	837			500.5	604.417											613	824			357.048	646.484
308	142			518.641	563.667											615.5	600			366.396	481.679
312	146			531.935	539.717											616.667	673.667			386.25	423.543
379	841			527.812	654											617	629			391.532	352.138
418.8	598.6			546.632	665.158											617	677			390.739	681.933
446	762.5			564.882	579.941											618.5	682			400.962	607.607
455	210			589.241	550.093											620	618			398.24	467.43
462	657.5			585.812	568.812											623	703			405.881	496.514
474	677			589.413	659.283											625	672.5			405.284	566.689
486	646.25			589.964	696.313											625.5	677			404.875	677.312
494	649			612.896	590.349											626	669			409.898	455.307
494	701			646.04	576.147											626.5	696			422.2	527.12
497	655			653.236	548.333											626	703			426.735	673.984
505	656			677.788	624.269											627	699			485.338	672.534
518	649.5			687.375	546.708											627.667	705.333			442.589	510.566
521	645.5			685	611.238											632.6	726.8			454.162	619.167
542.8	629			765.295	689.116											634	790			451.372	720.64
553	639			347.26	665.447											635.5	793.5			448.63	492.111
560	650.25			365.574	585.956											636	780			449.413	698.913
576.667	672.333			402.021	681.445											636	796			472.387	766.563
581.5	629			424.617	726.859											639	738			457.682	479.45
603.333	640.667			449.5	561											643.857	763.286			458.609	516.362
609	655			494.476	493.068											646	768			473.288	574.286
611	313			513.224	728.194											651.5	675			477.07	704.298
614	660			516.925	546.208											660	761.5			501.692	373.436
615.5	671.5			561.007	628.313											662.5	756.5			507.709	552.016
623.5	490			594.571	682.849											664.333	701.889			504.459	473.867
639	654			379.198	507.135											664	750			511.952	527.246
641	705.5			392.42	479.75											665.75	696			526.115	544.137
642.667	670.667			399.255	570.915											667	707.5			528.241	593.696
642	673			406.435	537.543											669.25	713.25			535.05	622.246
643.5	662.5			413.634	485.62											669	742			530.845	565.338
646.857	665.571			423.931	505.051											672.5	710			532.581	525.957
651.4	830.6			426.016	530.629											672.5	721			541.122	600.367
651	730.5			429.229	468.896											672.5	731.5			565.466	675.793
658.5	690			462.624	505.742											674	728			550.523	564.477
665	822			480.369	529.515											745	586.25			558.459	632.293
666	701			481.867	614.951											330	646			555.312	607.969
666	771			499.875	511.479											338.5	614			562.734	462.298
670	771			504.882	589.176											345	672			569.424	519.967
677	601			516.945	521.493											351	615			577.788	539.99
678	603			544.613	669.564											356	617			584.843	598.855
679.5	677.5			586.188	535.646											359	618			583.79	638.926
681	737			674.316	670.541											363	619.5			638.492	611.785
681	766			678.068	535.728											365	622			237.474	623.684
683	683			396	523.349											368	623.5			306.517	473.385
685	668			425.981	475.613											370	620			313.726	671.054
685	743.5			426.803	509.455											373.4	628.9			382.258	745.851
686	764			426.49	544.814											372.5	623			396.632	774.35
687	699			427.676	489.521											375.5	627			406.181	416.367
689.5	654			447.484	545.629											375.667	640.333			438.865	415.462
689	757			446.654	529.284											378	626			457.208	508.231
690	830			489.817	502.321											392.571	650.857			448.472	567.389
691.667	630.333			501.463	673.315											391	723			475.009	626.415
695.5	632			505.427	543.973											396.75	726			541.115	404.789
696	835			519.176	645.706											396	731			546.722	289.254
698.5	840			537.465	641.349											397	637			599.306	468.099
703	790			550.546	627.908											398	654.333			603.682	629.682
704.75	795.125			553.409	534.045											397	743			617.676	394.359
706.5	641.5			570.486	521.413											399.5	741			638.2	788.296
707.333	689.667			569.882	712.961											400	672			675.69	797.586
713.889	775.778			566.538	543.538											402.333	657.667			313.104	543.708
716.667	772.333			595.442	486.216											403.333	725.333			344.917	551.542
720.5	772.2			600.176	630.919											403	751			377.678	651.064
719.5	778			613.352	512.154											405	743			395.317	686.594
727	778			621.845	680.159											407.2	679.6			398.976	507.625
728.667	780.333			648.005	543.089											409.6	664.8			395.78	627.08
729.5	718.5			652.299	480.209											412	690.9			408.61	607.466
729.5	770			788.77	698.921											410.778	696.111			425.229	690.539
731.333	683.667			442.417	536.111											411	706.286			417.44	648.291
731.667	784.333			473.723	477.319											410	742			420.133	488.4
739	846.25			469	598.671											411	684			426.545	446.068
756.5	729			492.429	613.975											412	635			444.113	652.985
770	655			492.651	564.093											412.333	667.667			444.709	402.602
780.667	655.333			517.188	629.248											415.5	632.5			441.449	578.673
780.5	776			558.424	473.237											414.333	718.333			443.958	508.125
792	657			616.264	521.67											415	670			450.715	545.066
792	928			630.015	657.015											418.5	673.5			450	576.385
793.667	652.333			662.767	713.344											422.8	679.8			456.296	443.37
806.5	654.5			347.698	636.619											423.5	717.5			467.024	711.642
830	778			371.329	509.683											425	671			475.813	484.356
110.5	884.5			400.929	459.571											431.2	693			477.4	775.96
301.5	712			408.224	650.759											435	571			488.583	695.201
335	605			427.118	477.804											468.444	577.111			490.556	519.833
338	698			425.438	490.625											469	785			494.417	591.717
343	673			429.34	463.383											471.286	840.143			501.4	817.667
359.6	959.6			456.782	656.847											476	574			513.837	480.327
361	956			470.714	639.143											477	628			519.618	518.127
403	680			471.88	608.36											477	841			527.987	696.159
407.5	855			479.373	673.43											489	646			524.616	635.132
409	669			479.1	547.837											494	874			552.575	480.475
410	667			491.132	661.265											497.5	677.5			582.359	477.781
415	603			509.865	609.257											502	855			585.681	458.145
416.5	605			512.61	484.94											503	679			598.783	286.696
420.5	480.5			521.644	653.051											505.6	679.8			607	464.609
447	665			523.424	581.496											507	652			607.897	541.481
452.5	666			546.486	464.729											508.5	602			611.877	576.173
461	663			557.857	657.49											508.5	683			613.913	588.652
462	651			626.775	619.346											511.5	685			626.4	574.64
465.5	668			647.28	636.769											524	624			677.51	738.714
470	632			682.463	680.289											529	623			699.528	851.283
472.2	555.4			682.062	517.542											530.5	582			265.108	359.983
490.778	816.444			692.777	742.543											548.167	670			339.094	507.867
495.5	606			720.818	749.329											553	318			360.117	398.103
498.667	608.333			758.27	632.126											564.5	598			370.986	569.402
512	627.75			341.547	603.16											581	601			366.933	545.6
524.5	646			379.894	498.011											613.5	858			381.617	432.896
531	648.5			391	522.5											632	802.5			413.571	643.679
530	677			420.34	486.608											719	512			443.975	566.122
532.857	613			443.241	502.366											295.5	466.5			468.488	368.129
531.5	619			442.214	605.589											313	689			445.169	432.446
535.8	617.6			442.111	555.931											314	769			477.363	527.27
539.25	666			456.952	454.492											337	845			485	634.812
539	620			471.377	674.507											357.5	666.5			516.114	398.565
539	690			490.61	576.073											368	621			498.453	491.491
546.5	694			508.632	453.171											371	620			530.164	275.998
554.5	686			519.662	536.803											374	641			527.325	475.398
554	705			530.645	721.194											375	624			547.529	626.557
555.667	683.333			535.479	572.708											375	643			542.26	516.68
558.5	679			536.438	741.688											378	650			559.884	383.366
559	692			551.14	648.256											379.5	628			600.083	638.394
565	699			582.596	585.712											382	630
568.5	436.5			591.712	674.019											385	632
569	650			617.685	556.607											391	794
578.5	672			668.04	593.04											400	574
583	678			691.321	513.918											417	847
603.5	745			701.818	658.111											426	609
609	736.5			309.849	532.685											428.5	774
611.6	747.8			324.115	552.108											438	620
615.5	752			360.906	495.442											441	620
616	817			393.167	483.25											453	780
623.333	697.667			405.333	608.245											453	839
625	706			442.81	507.095											455	611
628.667	701.667			471.574	629.704											463.5	610
638	696			491.188	516.188											465.5	612
639.5	667			546.105	619.43											468	573
642	669			553.75	660.071											473	609.667
650	676			583.786	692.714											478	609
657	682			634.657	545.629											482	608
658	609			655.182	554.909											484	586
694.5	765			690.448	570.792											485	607
697	610			771.974	516.128											488.667	605.667
703.333	689.667			370.842	606.961											491	837
705	609			430.166	616.203											492	603
723.5	749			432.889	655.444											497	602
725	558			447.467	761.043											507.5	599
726	561			451.88	713.44											515.5	596
731.714	552.571			466.197	676.233											516	453
776.5	776			472.677	466.24											518.833	594.333
777	780			469.643	793.214											518	588
72	651			487.543	672.739											523.6	592.6
144	502			501.151	586.119											553.5	758
156	461			497.32	739.84											575	850
168	462			510.05	505.77											593	730
171.75	512.75			518.541	454.849											616	716
196.5	467			509.975	691											651	841
207.3	838.7			536.907	720.64											652	652
211.2	642.4			558.474	690.224											653	648
213.5	355			577.135	653.486											667	682
214	875			587.952	473.952											671	866
217	867			620.9	635.169											744	568
220.333	643.667			624.377	716.528											187	532.5
224.5	875			643.279	565.561											203	466.5
226	650			634.423	691.308											213	403
234.333	651.111			644.783	601.435											223	600
237	868			675.195	574.414											228	412.5
238.5	560			683.126	532.994											243.5	845
238	873			700.94	669.655											272	545
246	865			701.875	612.643											398	745
250	412			714.786	697.929											400	855
252.5	367			718.729	825.262											402	835
267.333	685.333			717.3	612.433											440	614
278.571	674.714			722.017	736.033											456	589.5
298.5	641			730.618	748.529											466	808
301.667	628.333			736.809	586.139											468	606
328.667	607.333			746.965	600.667											469	398
337	751			790.586	596.871											469	589
344.5	504			303.626	610.32											472	605
344	748.5			319.797	556.11											497.333	595.333
345	873.75			346.089	689.723											500	568
368.5	872			361.545	610.909											506	718
370.5	856.5			386.142	522.384											516.333	645
376.667	871.667			385.943	561.049											533	607
378.5	740			404.622	535.655											538	596
378	869			410.099	579.154											618.4	649.2
417.5	626			436.318	457.968											631.667	606.167
418.5	695.5			434.873	533.218											631.571	613.714
424.5	651			430.37	634.87											632	620
480.429	662.429			459.614	758.545											632	623
478.75	784.75			459.069	513.052											632	626.5
500	673			464.587	792.522											633	600
501	679			467.746	743.324											633	629
506	588			477.523	542.451											637	636
509.5	684			487.868	593.981											639	577.5
521.5	778			534.411	582.233											639	638.5
526.5	590			561.943	786.296											647	652
526	780			564.705	686.914											656	625.5
536.5	700			566.982	601.434											65	510
541	444			573.276	537.805											73.5	706
546	656			587.475	690.881											105	591
552.5	597			595.747	699											106	518
560.2	597.6			617.255	538.652											123	727
562.5	786			602.857	466.262											126.5	729
575.5	730.5			637.63	623.447											145	363
605.5	589			676.257	609.229											194.5	318
611	593			710.071	853.027											209	762.5
612.2	595.4			698.017	572.644											217.25	377.25
614	585			758.703	686.341											256	914
622	604			782.264	601.566											262	674.2
628.5	686.5			280.441	659.398											261	684
632.333	678.333			306.713	502.217											291	671.5
637	690.5			323.746	614.271											304	476.5
644.5	715.5			358.155	523.096											323	869.5
646.5	768			351.172	696.121											386.5	580
649	593			393.047	554.047											388	326
655	773			424.554	650.581											419.286	255.429
660	767			434.642	500.873											420	69.5
660	779			453.937	540.329											456	324
661	775			485.237	657.731											460.2	599.4
671	733			495.335	580.564											463	603
672	525			524.078	672.882											472	607
672.5	603.5			556.298	755.045											475.5	609
673	392			563.297	666.959											536	635.5
675	606			617.359	594.812											547	729.5
677.333	380.333			751.8	731.829											567.5	304
678.667	666.333			782.029	736.588											595	443.286
685.2	730.4			820.148	865.018											597	653
687.857	541.714			344.559	614.795											607	399
689.5	496			409.649	672.558											611.6	498.2
692	594			426.943	666.045											638.5	586.5
694.667	530.889			441.602	754.019											641.4	654.5
695.333	512.667			455.651	657.566											648.5	1025
696.714	606.857			454.35	576.38											667.444	1014.33
698.667	515.333			461.059	563.608											709.25	434.75
699.5	511			534.44	590.503											713.5	676
699.5	735.5			547.588	509.624											721.5	788.5
702.5	516.5			554.293	647.301											734.5	113
704.5	495			578.116	792.377											733.333	124.333
706.5	516.5			617.707	866.724											736	716
706.5	522.5			635.568	704.616											740.5	625
707.5	732.5			621.534	935.943											743	718
708	498			652.783	910.398											743.5	633.5
708.5	503.5			684.323	678.879											745.125	639.125
709	513			692.265	909.038											744	678
711	493.5			686.618	866.382											745	722
712.667	605.333			301.405	569.167											745.571	714.571
716.5	492			307.833	535.008											301	479
716.667	500.333			323.373	549.775											316.5	496
728.333	471.333			355.603	558.702											325	532
730	492.5			393.15	876.691											328.571	496.286
732	771			463.696	590.032											329	691
735.5	616			480.743	766.035											332.667	492.667
737	473.75			502.414	654.958											335.444	489.222
742.5	606			561.251	522.15											341.6	487.6
744.5	451.5			563.326	542.539											342.875	483.25
746.5	470.5			581.115	465.066											347	815
747	625			608.271	616.984											355	485
750.5	439			621.384	759.108											358	509
754	439.5			726.07	855.211											365	514.5
758	445			729.641	474.141											366	840
761	697			732.955	637.009											370	478.2
762.4	418.8			735.789	491.684											370	515
762.5	767			748.019	541.404											373.667	516.333
764	440.833			753.273	615.303											377.5	519.5
763.667	457.667			804.64	599.96											380	518
764.2	843.6			179.475	547.787											413	655
765.8	688.4			174.206	644.553											419.25	506.75
765	692			211.179	679.557											422	502.5
832.5	712			229.902	534.361											424	498
188.5	530			223.042	512.421											429	530
195	395.5			253.073	682.933											433	471
210.222	453.444			266.473	655.187											433.8	487.4
214.5	614.5			285.391	603.58											434	473
215	850			283.549	674.373											435	441
217	610			298.775	620.955											437.5	429.5
219.6	847.8			333.974	515.015											437	479
223	455			346.13	578.854											438	540
222.5	850			376.821	544.698											440.5	439
222.5	575.5			363.191	604.927											445.5	542
231.5	456			394.942	616.174											446.5	548
239.5	628			398.788	658.288											454	762
241	520			406.371	599.887											456	770
246.333	636.167			429.116	765.384											463	846
248.5	445			441.427	500.685											464.333	472.667
262	718			463.734	531.232											467	477
266.167	703			495.203	626.492											468	492
266.5	477			575.487	812.256											470	583
266.5	651			574.263	576.303											473.5	649
268	780.5			604.696	692.826											491	650.5
274.222	562.111			628.793	660.037											493	653.5
272	659			675.819	658.21											496.4	496.4
285	352.5			745.606	470.983											496.5	491
292	653.5			743.587	656.486											500	502
293	520			313.714	544.637											501.5	731
294.5	656			351.44	486.052											503.5	484
296.667	659.333			361.338	544.511											505	706
297.5	725			380.101	488.064											506	497
297	773			387.664	557.47											515	578
298.5	354			429.908	549.457											515	692
298	592			449.314	586.121											533	596
308	735			477.984	467.111											535	489.5
310	269			492.43	685.252											537	760
313.75	249			497.08	597.12											539.5	731
315	279			531.813	547.846											540.333	596.333
317.125	266.125			541.627	515.897											543.5	788.5
323.125	226.125			583.747	731.899											544	593.5
323	240.5			691.619	624.008											551.5	791.5
324.5	554.5			720.123	723.981											551	801
325	631			729.879	678.994											555	733.75
326	545.5			776.109	502.073											589.5	609.5
328	635			334.542	551.532											604.5	600.5
345	623			373.614	612.703											630	696
348.5	617			381.845	464.825											654	626
349.5	182.5			403.863	485.457											393.333	491.333
354	183			400	443.5											396	505
355	704			423.346	461.02											418	553
365	478.333			418.455	547.626											419	502
366	381.5			445.947	545.868											421	505
365	796			457.083	433.375											423.75	505.75
367	798.5			476.957	517.884											426	501.5
368.667	589.667			488.085	442.068											430	497
371.5	572			499.167	646.833											433.5	507
374.429	580.714			502.967	701.197											436	509
374.333	722.111			514.344	489.062											437.333	501.667
375.5	572			518.727	534.455											447.333	505.333
376.5	382.5			563.396	473.021											454	501
378	580			588.12	530.892											466.5	503.5
380	386			602.16	715.744											470.667	501.667
379.75	572.75			629.99	668.939											481.4	520.2
382.667	564.333			637.026	513.692											481.5	517.5
382.5	569			639.871	702.548											488	556
388.667	588.667			667.877	416.395											494.6	528.2
388	865			700.069	643.385											191	593
393	614			723.635	747.346											208.5	513.5
400	387			736.529	661.362											223	581
403.5	868			734.527	724.324											246	401
414	395			768.735	570.145											255	653
420	550			277.587	581.365											270	491
422.8	530.4			322	485											278	502
425.5	611			340.771	431.403											286	506.5
434.333	771.333			347.895	472.671											291	501
434	777			353.161	502.961											291.333	504
435	842.5			353.638	452.245											299.286	504
445.5	608.5			379.475	495.35											307.6	503.8
449	834			388.306	466.592											309	501
451	398			402.731	552.086											316.333	524.667
451	830.5			427.558	577.186											320	732
459	619			432.967	652.797											322.5	588
465	681			436.28	480.677											326	484.714
467	663			451.713	505.983											327	572.5
470	684			448.617	416.4											344	504
485.5	642			483.393	700.15											364	458
486	858			481.326	513.093											441	592
486.333	861.333			483.523	482.508											444	717
487	875			487.818	447.545											449	528
487	894			524.096	593.589											458	715
488	879			535.38	456.96											465.2	551.2
492.5	647			553.712	591.797											469	552
499.5	681			557.831	501.427											480	529
502	655.5			555.175	480.596											489.5	568
509	383.5			557.531	725.781											495.6	571.8
517.333	666.333			577.269	523.923											500	607
520.6	893.2			592.507	756.26											503.889	581.667
527	767			601.25	577.327											505.9	766.2
528	607			600.611	421.648											505	501
530.667	763.667			606	526.733											506.8	452.4
530	768			650.452	505.774											535	663
531.6	869.2			685.631	491.738											537.5	662.5
537	641			693.524	581.738											537	723
539.667	688.667			706.736	474.154											541.333	485.667
549	918			275.569	599.157											541	704
554.2	909.6			298.333	503.095											543	697
573	791			332.929	513.195											544	710
576	742.25			332.961	564.135											548	477.5
577.333	869.333			326.468	491.924											553	475
579.5	745.125			362.254	446.932											555	483
580.5	707.5			384.85	478.552											577	662
585.5	714			373.462	512.888											578.5	474
604.5	642			401.067	419.865											582	554
611.5	645			412.259	461.842											606.5	460
612	668			426.255	419.135											609.5	459
616.5	608			431.671	612.384											622	862
628	668			424.697	442.182											628	609
629.667	689.667			457.699	457.005											631.333	468
629.5	777			468.366	429.51											633	672
630.5	654.5			459.129	661.727											636	443
634	654.5			492.764	521.496											643.5	441
636.333	696.333			490.222	614.528											661	427
635.667	786.667			520.026	556.949											661	533
638	762.5			581.344	594.761											673	748
640.8	683			604.337	529.271											675	471
644	687			587.675	661.896											680	455
644.5	695.5			640.235	628.059											691	527
646.2	705.6			644.611	549.944											695	618
651.333	707.333			651.741	519.812											702	424
653	712			720.093	521.558											717	601
653	776			756.27	618.73											725	814
654.667	715.667			245.32	486											212	486
656.5	738.5			251.438	555.162											219	498
656	777			261.97	527.197											230.333	427.667
657	717			278.545	537.455											232.286	431.571
659	587			306.905	506.115											231	889
663	702.5			310.464	549.435											234.667	434.667
664	691.5			366.269	545.274											234.5	443.5
666	658			356.5	604.417											244.667	479.667
666.8	698.4			424.175	563.781											245	856
666	749			414	635											250.5	420.833
668	704			495.233	578.397											249.5	440.667
672.667	645.667			493.24	522.44											253	723
674	642			543.687	474.545											253.5	419
675	709			601.434	502.575											261	466
676	642			640.788	723.733											261	470
677	662			637.125	517.875											284	548
682.6	771.2			682.949	505.322											290	669
683	643			751.945	546.685											296	751
683	652			771.495	551.8											299	557
685.667	533.333			359.062	435.864											307	476
686	718			405.857	461.786											310	636
694	655			469.316	559.73											312	528
694.667	768.333			475.829	545.143											319	678
696.5	657.5			522.718	545.972											319	684
697	661			561.123	453.108											321	545
698.5	664			689.48	783.2											321	667
698.5	666			708.731	654.024											326	471
699	766			751.667	583.97											335	661
703.5	766			157.667	635.424											335	676
706.5	764			239.291	653.5											340	480
708	766.5			262.599	640.775											340	482
710	645			271.117	497.894											344	639
711.2	651.6			316.277	626.255											346	644
720.5	753			342.165	689.018											346	667
721	764			361.75	594.684											357	696
722	571			375.746	540.887											362	536
725.5	310			399.132	669.595											373	585
725.5	764			415.682	598.745											373	653
727.556	318.444			404.7	567.7											374	577
730.333	779.667			429.789	545.842											375	570
731.5	762			459.226	730.161											377	588
737.333	658			470.774	614.952											380	708
736.667	731.667			482.729	647.895											382	729
743.667	647.333			502.118	524.706											383	718
758	642			509.599	618.168											397	605.5
760	723			514.199	569.154											400	591
760	771			503.889	731.2											404	618
766	667.5			526.204	690.932											406	767
768.5	645			559.461	520.838											419	567
770.5	642			581.576	508.475											420	793
773	636			596.027	551.392											426	593.5
774.333	664.333			615.827	563.267											436	553
777	657			647.104	629.278											450	442
777	687			653.205	502.342											455	595
778	690.5			661.87	687.442											457	838
779.5	647			697.872	766.185											466	595.5
782	788.5			235.705	605.656											469	580
787.2	814.6			311.337	530.499											471	705
795	727			273.837	645.705											493	427
830	717.5			297.451	608.976											494	610
835.333	717.5			291.848	616.371											494	824
21.5	709			297.993	486.95											496	731
47	752.5			305.683	514.021											497	700
61	635			321.532	552.011											508	850
82	645			333.908	596.504											509	565
101.4	571.4			348.444	494.827											511	651
134	739			340.625	578.906											515	445
139.5	892.5			383.283	481.09											520	742
165.5	848			396.191	524.171											524	456
198.5	497			394.548	648.306											539	607
203	452.5			409.082	666.531											544	611
219.5	730			423.846	654.361											549.5	584
227	721			424.737	530.095											555.667	641.667
231.5	551.5			424.248	608.193											556	606
233.25	718.625			450.74	506.63											562.5	596.5
233	644			453.229	538.627											567.5	607
238.333	719.667			444.547	644.623											581	481
241.5	615			455.888	637.803											593	575.5
242.5	699			461.278	662.215											595	640
243	720			484.989	493.978											596	586
249.5	743			480.642	544.226											598	588
251.667	632.667			486.704	660.222											601	611
253	627			486.378	575.092											606	616
256	634.25			489.118	458.667											607	594
256.5	592			511.28	713.634											608.5	616
257	528			552.678	543.723											615	640.5
266.286	433.429			518.549	702.459											617.5	617.5
288.5	529.5			517.505	673.053											620	594
291.5	531			531.646	675.451											623.5	647.5
297	358			549.695	602.893											627.5	636.333
301	930			578.593	444.867											626.5	640
306	604			587.5	681.071											626	647
310	594.5			595.477	604.785											627	644.5
312	608.5			615.478	467.876											627.5	674.5
317	507			611.098	601.915											628	695
332	551			621.27	575.738											631	653.167
350.5	954			626.267	714.64											632	642
355.333	544.333			667.913	580.885											635	654
356	550			668.772	602.488											638	632
357	547			669.73	745.77											640	558
360	828			684.085	501.778											646	462
367.5	590			789.144	599.635											649	602
374.5	529.5			333.684	504.211											651.5	634
378.444	511.778			341.133	619.156											652	628
376.667	523.667			356.903	621.694											655.333	618.667
378.9	591.8			359.409	454.364											656	636
378.5	526			405.829	609.988											656	621
379.5	595			442.043	492.364											662	537
379	646			482.5	568.25											677	410
381	504.5			503.724	743.425											698	783
383.5	453			520.855	592.076											716	803
386.2	506.6			534.054	687.216											727	544
386	509.333			540.267	667.333											218	523
385.5	516			555.648	630.593											220.667	595.667
386	504			603.829	627.814											220.333	600.333
390.5	510			610.155	682.527											228	601
391	496			610.342	599.895											234	668
394	474			623.419	745.114											242.333	596.667
396.5	831			631.025	732.5											244	635
401	469			632.667	635.259											266	661
403	581			657.179	556.714											270	732
415	587			682.763	735.775											271	752.5
417.5	557			679.716	542.582											273	894
417	741			694.532	722.048											283	807
430.833	970.667			325.938	584.562											286	744
448.667	600.667			361.62	542.209											300	611
452	601.5			341.5	568											307	790
454.5	674			373.196	594.828											313.5	599
455.667	771.667			405.41	571.702											316	984
461	851			431.859	532.765											329	686
463.5	553.5			431.203	627.906											332	810
481.5	605.5			462.722	593.741											335	750
482.5	608			501.75	573.219											335	817
487.8	983.4			483.894	481.202											343	620
488	611			493.77	669.475											345	642
489	928.667			504.086	647.611											347	811
488.25	933.25			510.591	496.091											355	687
488	944			534.13	609.969											362	790
489	657			532.799	513.73											364	568
490.5	922			552.472	676.567											370	678
491.5	917			557.952	520.798											372	798
494.4	913.6			579.491	599.536											382	818
501.5	782			599.907	654.309											389	613
504	623			639.791	628.943											418.2	545.4
509.5	582			608.016	709.497											418.333	537.667
511	567			627.358	688.149											418	826
513	566			645.015	673.725											427	668
518.667	564.667			644.221	491.038											437	708
518	639			650.595	575.262											439	625
518	653			723.481	662.306											440	399
519	927.5			742.367	537.5											441	497
523	656			766.659	568.906											440	642
524	945			796.49	622.828											456	961
524	948.5			296.549	546.293											483	680
529.667	825.111			346.062	547.713											490	722
532	830			383.758	433.596											491.5	843
535	757			397.732	622.173											502	635
537.5	831			430.84	524.551											506	670
540.5	759.5			456.04	456.756											518	715
542	633			450.321	633.25											519	659
547.5	714			475.167	485.133											526.5	677
552.5	636			526.514	552.027											529	679.5
559.667	638.667			560.047	523.925											531	959
560.5	635			573.986	644.551											536	675
560.5	713.5			611.279	561.349											552	680.5
570.5	655.5			635.793	607.144											556	672
577.5	661			648.363	550.104											582	658
579.8	608.6			205.908	525.602											586	681
580	701.5			212.376	539.063											597.714	667.286
581	660			271.008	523.059											597	671
583.5	610			287.523	594.04											597	700
587.2	436.6			304.289	486.616											598	530
593	665			330.893	411.147											598	748
611.222	633.889			337.265	556.922											604	712
614	756			350.937	517.316											616	870
615	639			413.451	624.362											618	675
620.5	547			369.111	458.661											628	657
624	903.5			365.969	582.16											653.333	854.333
626.667	674.667			372.841	435.616											654	858
627.5	670.5			402.549	495.306											665.5	671
628.5	647			397.656	550.106											674	465
637	647.5			417.564	570.578											711	552
643	877			413.42	681.877											235	615
653.444	714.667			465.573	513.93											305	760
656.857	704.857			429.774	475.104											309	662.25
656.5	717			423.569	536.98											345	669
657.5	900			454.842	415.597											345	846
663	602			478.983	442.88											350	654
665	899			489.636	791.388											356	796
664	901			482.689	718.766											363	705
666	659			500.37	686.111											368	705.5
667.222	991.889			515.254	637.492											372.714	698.714
670	718			523.82	583.746											376.4	705.8
672	993.8			544.028	508.417											388.5	706
674	991			544.684	632.877											392	706
678	719.75			555.798	483.037											398	580
677.5	988			547.734	550.617											431	705
680	704.5			563.359	624.309											444.667	701.333
682	631.5			561.01	683.678											496.25	699.75
698.667	715.667			567.806	566.056											512.5	919.5
700.2	719.2			579.55	716.887											515.167	872.833
700	637			582.972	732.401											514	877
701	577			597.939	478.809											514	922.5
702.5	700			600.45	641.801											515	926
703	847.5			615.343	506.507											516	928
704.5	719.5			642.519	734.975											517.5	930
705.5	597			633.529	549.556											597	666.5
707	720.5			636.378	572.37											598	797
708	614.5			642.099	457.605											647	822
708.333	834.333			650.419	603.326											657	745
713	667			642.873	483.764											687	514
713.667	725.333			660.684	654.038											324	497
715	620.5			674.703	557.014											384	721
715.556	828.111			685.259	570.975											457	825
724	707.5			681.763	543.085											470.8	897.6
725.667	723.667			690.009	509.589											491	897
727	726			707.8	570.017											492	814
727.5	974			753.588	548.49											495.5	885
729	662			777.812	555.758											498.5	878
730.333	612.667			230.132	553.161											500	812
730.5	776			300.302	643.626											504	827
731.5	711.5			362.954	548.765											529	829
732.5	637			381.564	721.711											545.143	810
734.2	738.6			461.447	689.879											553.167	804.833
737	836			505.116	620.522											585	648
742.5	715			506.8	519.88											587	790
742.5	717			558.185	449.758											658	753.5
746	710			564.888	710.696											673	749
765	764			581.092	520.438											696	801
774.5	638.5			134.372	609.736											697.667	785.333
781.333	511.333			153.863	630.984											698	808
793	503			172.958	592.845											700.25	794
797.167	502.333			220.901	459.52											700.5	805.5
801	502			240.582	610.634											700	811.5
31	684			262.03	523.277											709	839
75.5	612			266.957	643.507											715.667	845.667
95.2	748.4			320.033	458.321											731.5	852
106	609.5			330.892	691.979											732	857.5
114.5	612			371.462	607.283											734	864
120	759			398.851	500.764											740	869
127	680			415.668	822.432											221.333	775.333
142	593			452.822	608.121											357	712
144.667	623.667			452.463	658.93											446	734
149.667	619.667			506.992	673.039											454.5	759.5
158	627.5			548.434	558.105											457.25	755.75
160	799			565.625	643.862											514.5	878.5
161.333	577.667			560.567	688.045											516	644
161	612			573.84	820.435											632	866
162	628			573.133	769.855											294.5	792
172.556	872.333			573.106	720.746											510.5	687.5
173	865			732.85	693.408											511	691
177	867.5			737.52	497.638											512	680
177.857	514.714			760.492	456.516											516	610
184	541.625			783.32	667.169											519.9	559.1
189	484			267.681	439.92											522.667	604
189	489			352.638	603.493											523	593
189	789			359.273	569.926											526	603
190	482			382.818	468.4											529	602.5
191.714	491.857			429.94	608.53											557	648
192.667	486.667			428.143	529.984											558	653.5
193	415			449.115	419.513											561.75	668
193.5	556			465.22	697.712											564	676
195.778	616.556			467.038	639.252											565	684
194	811			471.611	626.137											568	686.429
196	704			478.53	690.627											571	692
200.556	476.333			492.305	656.902											574	699
201.5	433.5			486.155	566.264											583	743
201	494			499.603	522.12											593.167	634
206.333	569.333			498.935	424.907											593	617
208.4	575.2			507.098	581.541											594.333	722.333
209	436			512.574	747.738											337.5	730
210.5	484			525.486	757.243											361	502
217	462			543.029	685.543											368	798
223	577.5			569.062	537.22											381.5	729
225.5	706			565.116	826.259											394	537
227.714	497.286			591.397	813.409											399	729
232	693.5			588.874	622.586											465	709
240	773			600.491	593.625											500	734
242	697			608.707	742.61											530	490
249.667	859.333			640.361	542.222											532.5	541.8
262.286	574.286			642.586	756.138											531.5	545.5
263	780			645.695	688.021											531	549.5
264	707			654.264	599.709											532	534
265	657.5			666.511	481.835											537	512
274	838.5			668.176	544.313											540.667	521.667
275.5	590			677.122	673.291											541.333	505.667
277.5	789			682.882	689.835											543.5	496
283	606			686.893	833.926											543	503
284.667	850.667			690.846	499.692											548	483
287.2	869.4			259.256	617.502											548	486
287.333	792.333			234.689	495.126											557	592
289	753			277.923	539.455											559.25	599
295.8	669.6			304.055	492.582											558	602.5
298	681			306.152	637.089											559	617.5
307	697			318.36	603.422											559	608
309	607			347.269	655.774											562	621
319.667	745.333			355.485	620.918											566.333	632.333
331	807			387.286	547.143											591	409
333.5	765			406.863	458.205											601	690
345	539			428.242	472.961											606	690
375	816			420.025	646.303											609.5	693
379	806			430.644	503.89											612	633
388	467			472.978	554.993											613	502
391	512			623.345	602.199											613.5	694
397.5	492			604.547	693.457											614	631
404	568			614.132	625.925											616.333	691.333
412	515			646.72	689.435											625	676
412.5	819			675.236	641.917											627.143	668.714
416	486			734.785	582.031											630.333	622.667
416.25	814.75			813.794	665.088											631	652
417.5	822.5			264.074	520.819											246.333	479.333
423.5	436			272.944	591.346											260.5	477
424	611			290.738	445.602											260.333	484.333
430	545			315.613	567.879											260	496
431	434.5			319.981	516.774											261	490.5
431.667	809.667			341.01	477.061											264	476
431	813.5			345.961	592.412											268	498.5
434.5	421			353.378	556.568											305	590
436.429	799.143			389.806	545.056											317.2	593.4
450.8	814			398.255	485.316											322	522
452	822.5			400.718	603.394											330.8	484.6
458	412.5			411.935	533.554											331	520
461.4	812.2			434.679	552.01											336	486
463	820			418.275	525.353											342.429	522.143
466.5	312			461.801	569.581											357	532.5
466.5	618.5			497.563	623.579											357.5	540
466.5	822			504.085	690.744											358.25	528
467.5	853			513.061	595.955											386.167	526.333
468	813			546.948	670.336											388	536
472.667	821.333			550.551	509.61											393	540.5
475.5	712			552.455	572.636											397.857	523.286
476.714	810.429			562.326	742.082											397	542
476.5	707			590.593	591.025											401	545
478	705			641.163	765.245											405	571
478.333	799.667			658.066	611.125											410.714	769
479	621			657.962	744.038											413	524
480.5	699			691.936	472.845											418.5	524
482	574			691.692	587.628											439.625	527.25
484.5	690.5			711.517	775.5											443.333	523.333
485	427			711.186	547.9											452.5	532
492	474			752.652	758.411											454.5	757
501	643			214.57	658.896											465	589.5
503.286	671			238.766	467.201											468.444	543.556
502.875	675			336.638	739.179											510.333	620.667
503	666			399.306	639.365											518.75	564
511.167	775			418.181	732.488											519	553
518	675			468.55	746.441											520	551
519.111	838.222			469.625	708.6											527.5	546
518	873			493.27	630.155											531	549
527.5	789			630.785	661.569											536	547.5
533.333	683.333			641.552	814.794											537	829.5
534	659			302.28	497.659											539.5	550
535	680			314.769	411.046											540	684
535.333	579.333			383.756	594.34											540	693
539.333	642.333			342.602	463.599											584	572.25
540.4	686.4			407.918	640.904											591	568
553.8	773.6			428.708	694.962											594.5	564.5
562.5	676			452.51	584.865											601	566
566.5	640.5			447.605	439.249											615.8	559.2
571.5	685.5			535.53	589.668											621	558
574	600.5			549.916	671.697											628	750.75
575	693.714			549.143	465.433											631.5	750
578	690			563.562	551.197											634.8	746.6
579.667	907.667			596.24	693.069											287.333	688.667
580.857	613.286			593.391	504.467											289	700
580.333	639.333			623.289	661.487											293.5	703
586.143	794.571			303.622	554.311											294	708.5
585	612			342.248	549.312											390	687
594.5	648.5			402.96	638.751											408.6	442.8
596	606			539.816	625.737											425.167	461.167
599.333	651.889			584.62	736.617											432.5	464.5
600.5	694			598.065	562.448											437	469.75
601.5	790			677.181	574.965											467	812.5
603	699			736.145	741.869											470.5	482.5
605.714	648.429															475.667	815.333
608	777															477.5	485.5
609	713															479	488.5
612.5	771															480.167	577.5
615.5	620.5															479	832
616	766															482.833	491.833
617.5	645															492	842
620.5	600															494.5	924
621.167	657.167															495	843
624	634.714															510	507.5
624.5	650															514.25	505.25
626	664.25															515.111	527.778
628	658.25															526.333	503.667
627	770															531.5	504
629.5	665															536	504.833
630.5	686															577.8	724.2
631.5	634.5															581	785
631	756															586	709.5
631.333	762.667															85.5	513
633.833	682.833															387	862.375
633.5	639.5															417.5	595.5
635.667	768.333															693	807
638	667.286															710	794
637.5	677															43	660
639.5	642															46.5	680
640	765															72	510
643	647.5															146	491.75
644	652															169.5	315
646.714	649															194	708.75
647.5	644															198	576
648	777															215.5	821
652.5	472.667															218.667	861.667
652.5	671															240.286	704.571
653.5	690.5															249	356
654	805															273	356
654	851.5															273.5	708.5
655	672															277	605
655	718															291	607
655	747.5															303.667	615.333
656	577															307	615
656.667	729.333															310	620
657	579															315.25	622
660	740															328.8	402.4
661	576															342	628.111
662.5	745.75															353	339
663.333	433.333															379	640
665.333	574.833															387.5	341
665.5	651															416	767
666.5	734															426.5	1039
666.5	736															434	299
667	747															436	76.5
669.5	569															439.333	669.889
670	652															449	677
671.5	745.5															451.5	680
672	731															452	752
673	380															460.167	285.833
683	653															469	684.5
684	535															472	695
686.429	650															481	683
689.667	723.667															494.5	726
692.286	654.714															505.833	348.167
691	615.5															510.5	619
691	652															524.875	185.125
692.286	888.571															530.8	1023.6
692	613															549.6	685.2
697.333	672.333															553	681
697	675															560.167	1034.5
698.8	712.8															565.5	446.667
698.5	618.5															565	942
702	747															573.5	439
707.3	580.5															575.143	693.429
706.667	759.333															583	441
708.222	766															584.714	819
707.333	652.333															587.125	720.125
711.333	652.333															587.8	686.4
713	583															591.5	550.5
714	789															595	687
715.833	587.833															595	699
716.5	566															595.5	704
719	635															607	687
719.75	777															610	931
722	732															612.333	688.333
728.5	598															620.5	919
729.4	653.9															627.667	321.667
734	599.333															634.7	689.5
739	705															686.5	439.5
741.5	706.5															690.125	401.125
750	711															693.5	442
751.25	781.625															695	507
751.5	684															703.4	399.2
755.857	703.286															707	418
755.667	784.667															710	424.25
757	706															714.5	425.5
758.333	767.333															729	592
759	710															729	857
760	817															729.5	863.5
764	790															730	860
766	733.5															748	504
769.167	636.167															123.75	556.25
769	702.667															137.5	540.5
771.5	714															191.667	417.333
781	710															199	681
783	711															202	690.5
786.333	533.333															215	577.5
814	625															216.625	590.75
74	829.667															216	566
74	708															255	856
75.5	826															261.8	739.4
78.6667	832.333															293	621.5
81	708															302	605.5
83	833															310.714	978.571
100	822															325.714	934.571
102	821															342	682
108	877															348.5	579
115	621															358.5	582
121	769.5															385	618
123	775															387	673
139.2	522.6															390	491
141.8	519.4															430	176.5
163	683															434	152
170	437.5															435	180
178	512.5															437	150.5
181	693.5															439.6	165.8
181.5	736.5															444.333	152.333
183.4	599.8															449	110.25
187	716.25															459	994
187.667	468.667															471.667	644.333
190	697.5															472	633.5
191	511															485.5	204.5
191.333	702.333															487.5	207
191	709															487	748.5
194.167	487.333															493.5	275
193	712															495.25	209.375
194	570.5															495	226
194.667	696.667															496.5	303
195.167	708															500	286.75
196	578.333															500.5	223
202.5	709															522	518
206.25	723.625															530.714	630.571
207	439															532	297
209.333	717.333															533.5	626.5
214.5	703															536.5	406.5
231.8	580.4															539	419.5
244.5	581															540	455
246.333	537.333															543	394
250	536															547.667	451.667
250.5	570.5															549.833	423
255	883.5															552	327
259.2	565.6															553.75	427
258	616															554.5	333
262	566															554.5	640
262.5	585															558	343
265.833	503.167															558	613
267	539.5															559.5	621
267.5	499															563	623.5
270	541															567.333	646.333
274.5	541.5															568.25	632
281	676.5															575.5	623
288.5	587															580.5	627
290.5	541															581	237
293.333	549.667															582.5	648.5
299	551															583.5	456
326.8	585.4															585.5	632.25
332.2	580.6															584.5	660
337.5	566															588.5	271
340.5	413															597.25	276.25
342.5	415.5															601	282
343	910															602	549.75
347.714	417.429															601.9	630.5
347.5	566															603	540.778
349	568															603	623.5
351.714	420.429															609.5	545
360.667	574.667															614	436
387.5	594															616.8	433.4
399	652															618.667	478.667
405	525.5															634.4	949.2
404	618															637	624.5
426.667	335.556															637	948
428	777.5															639	619
434.5	545															641	622.25
444	710.2															641.5	617
446.25	697.375															646.333	616.333
446	704.25															649	614
449	777															651	618.5
450	696															652	624
451	720															654	615
454	682															656.125	612.125
459.5	618															659.5	617
459	811															663.5	622
464	819															674.5	583
470.5	783															710	599
474	784															725.444	155.667
475.5	731															726	578
476	686															733	148
479.8	665.6															738	457
479.5	700															741.5	347
481.75	720.375															743	218
487.333	399.333															745	489
489	794															144	908
515	786															146	910
516	736															174	444.75
520	869															180	890
522	781															181	893.714
526	890.5															230.6	709.2
534.5	780															233	711.5
543	719															275.8	752.4
543	772															283	754
544.5	786															323	885
544	821															380.714	304
545	655															386	299.4
546	760															392.5	295.5
548	583.286															396.2	295.4
548	657															399.714	551.143
548	720															403.286	548
555.75	721															406	773.25
556	684															410.333	549.111
557	682															448	419
559.667	722.667															506.5	694
568	720															540.714	916.571
569	722															547.5	730
573.5	856															552	694
575	650															553.5	687.5
581	595.5															555	725.5
581.5	356.5															556.25	668
587	739															556.5	674.5
590	597															558	174.25
618	760.5															559.333	680.667
621.5	724															565	722.5
622.5	880															568.429	641.857
631	814															569	627
642	703.5															572.5	635
642.333	599.333															573	601
644	370															576	451.25
646.5	367															575	576.5
648	740															576	565.5
650.8	311.8															577	559
650.8	692.6															578.286	571
654	398															578	628.25
655.5	545.875															579	446.5
654	809															580.25	475.25
655.333	693.333															581.556	514.778
656.833	574.167															585.5	534.5
659	692.5															587	894
663.2	691.6															689	47.5
667	618.25															704	158
670.25	538.875															708	46
676.5	694															719.333	29.8889
684	667.25															250	305.5
687.5	646															256	328
691.5	723															266	585
691	760															278	838
696.333	413.333															290	471
698	757															298.5	363
701	723															302.5	488
700	759															303.5	504
701	726															304	362
713.333	720.333															306.5	325.5
717	765.5															307.5	363
723.5	654.5															315.5	363
722.5	712.5															322.25	362.75
726.889	694.222															330.143	350.286
726	716															363	454
728	654															414.75	920.125
730	643.5															418	933.5
734.2	720.2															428	314.75
737	684															439	474
740.2	685.6															451	919
740	631															461	577
745.429	644.714															463.5	988.5
747.5	620.5															470	1016.5
748	706.5															514.8	1004.4
762.6	711.8															519.667	914
767.8	706.6															524.667	820.667
768	735															527	693
778.5	660.5															529	820.25
783.4	663.7															530.8	605.6
786	732															531	823.5
817.8	768															565	283
818.2	774.6															566.5	834
56.3333	660.667															572	833
73	599															579	817.5
78	817															580	825
82.125	599.875															586.25	437
84	814.75															586.5	956
124.75	546.25															587	901
125.5	792															588	966
128.667	544.667															590	981.75
137	525															591	879.5
142.1	528.3															591	965
142.167	625															592.5	290
145	626															593.5	972
149.7	532.3															596	792.5
158	537															597	784
164.5	627															598	798
173	756															599.5	801
173	763															603.5	317.5
180	829															604.5	800
185.5	826															605.5	819.5
186.667	830.667															611.667	613.833
200	724															615.6	325.2
202	462															622.333	956.333
214	861															627	617
224	280															633.5	815.5
228.5	596.5															634.5	506
242.5	744.5															640	626
246	728															641.667	511.833
249.2	264															642.75	606.125
250.286	693.714															641.5	813
252	618															643	815
253.25	781															646.286	804.571
253.667	262.667															653	634
261	348															653.5	826.5
261	883															654	794
262	752															657	526
263.5	429															658	640
265	883.833															660	518
275	354.5															662.5	310
286.5	753															662.4	644.2
288.5	356															664	647
298.5	753															666	699
301.5	762.5															667.5	528
303	523.5															668.667	650.667
306	766															668.5	834.5
307.625	774.75															669	646.5
307.5	528.5															672.5	645.5
307.5	577															675	647.5
309	366															676	836
312	572															680.667	808.667
314.6	773.2															682	384
316	561															683.429	503.143
317.8	514.4															684	816
319	524.5															687.5	520
320	564															687.333	545.667
325	436															688.75	560
331.5	750.5															688.5	818
337.5	589															690	823
341.333	683.333															690.5	853
345.5	435															691	821
354.8	532.4															693	792
357	580															697	311.5
357.5	599															705.833	823.167
359	663															707	708.5
361	598															711	265
364.714	518															714	532
371	802															715.667	840.333
374.5	563															726	836
378	597															742.5	746.5
378	694															274.333	259.667
379	691															320	924
380.333	860.333															326	939
404.667	542.667															329	713
404.5	601															397	837
404.333	702.333															406	794.5
408	594.5															423.5	610
412.5	931															443	365
415.167	623.833															463	804
415.5	429															482	807
415.5	594															489.5	759
419.8	619.4															495.333	588.667
419.333	827.333															503.5	590
421.6	614.6															509.5	594
423.5	593.5															522	603
424.333	571.333															530.5	606.5
429.667	664.667															558	601.5
430.667	652.667															559	607
436.8	583.4															561.667	608.333
440.333	627.333															571	793
443	609.5															574	804
443.8	627.4															583	551
444.5	803.5															584.333	657.333
451.5	612.5															593.25	349
453	655															597.5	718
456.667	817.667															609	733
462	830.5															614.5	500
462.333	723.667															615.5	507
464.5	805															617.5	503
465.5	532.5															620	507
467.667	552.667															626	824.5
469	557															627	554
470	554															629	508.25
478.2	782.6															631.778	513.889
478.5	558															632	821
482	780.5															636.75	813
482	609															636	818
484.667	327.333															637	962
489.5	777															639	508
490	941															641.667	809.667
492	777															656	514
493	756															659.333	572.667
498.5	764															665.5	517.5
500	711															669.5	793
500.75	772.25															697	368
501.667	509.667															722.833	815.333
501	515															725.5	372
503	714															282.5	443
505.5	589															290	343.5
506.5	770															292	443
511	591															299	442.5
515.5	764															304.667	433.667
517.667	609.667															307.333	438.333
532.333	745.333															311.2	436.6
533	751															311	855
536.333	604.333															314.5	435
537	785															333.5	797.5
540	640.333															335.5	511
539	768															336	671.5
542.5	513															342	659
555	766															345	880
558	696															374	430
562.333	695.333															382	793
565.5	923.5															383.667	787.667
566	737															384	351
568.5	651.5															392	479
571	678.5															412	709
574	679															413	331.5
574	697															421	731
574.333	803.333															446.4	554.8
581.5	695															485.25	446.75
582.667	681.667															489.5	454.5
583	666															490.75	458
584.5	801															492.5	461.5
585	601															499.5	342
586.2	738.4															499.5	832
585.667	876.333															512	462.25
589	732.5															571	729
590	799															587.5	579.5
595	665															596.333	748.667
595	722															634.6	307.8
596	683.5															652	634.5
597.8	686.2															652	671
597	726															675.75	425
598.5	720															710	880
600	706.5															720.667	698.667
601.5	784															737	688.833
607.5	911.5															746	696.5
607.875	916.875															214	815
608	701															215	458
612.714	705.571															216	816.5
614	790															216.667	819.667
617	777															218	727.5
619.25	666.5															223	480
619.2	781.6															224.333	677.333
620	678															233	815
622	565															236	812.5
622.5	763															252	341
626.5	719															274	273
626.8	787.4															278	899
626.5	790															290	536.5
628.5	784															292.75	451.375
633	793															296	449
634.8	462.2															296	451
638.5	720.1															297	856
639.7	728.7															299	795
641.5	512															300	453
645	781.5															306	756
646	689															316	882
649	496															333.5	254.5
653.833	721.667															349	512
652	752															354	682
653	346.5															355	499
653.5	754															366.25	489.75
659	722															366	364.5
661.5	794															372	876
662	601															381	505
663	642															383	479
666.667	641.667															388	569
668	794															390.5	558.5
670	691															390.5	568
675.5	791															394.5	566
682	636															398	621
682.667	767.333															399.333	565.333
685.5	636															407	559.667
686.5	546															408	588
691.5	707.5															409.5	704.5
691	744															410	602
693.667	598.667															411	582
693	746															413.2	536.6
694.333	585.333															413.5	541.5
695.5	700															420	531.5
695.8	767.6															420.333	534.667
696.5	746															422.286	541
697	682															422	584
698	254															424	554.5
698.5	763															427	593
701.5	715.5															431	585
702.333	572.333															432	550
703.5	559															434	465
706.5	664															435	568
707	767															436	572.5
708	666															439	569.714
710.8	599.4															444.6	783.8
713	593															445	432
714	632.75															446	429
714	587.5															446	879
714	600															447	545
715	582															447	566
715.5	602															448.833	573.667
715	609															449	496
715	769															453.5	620.5
717	611															454	574
718	757.25															457	572
718.5	768															460	552
721	633															461.6	765.8
722	605															462	531
724	760															463	570
725.333	590.333															463.5	747
734.5	646															469	272
739	507															469.25	531
745	667															470	648
747.5	597															470	528
752	669.5															470	902.5
756	674															471	407.5
760	495.5															471	534
761.667	662.667															476.667	357.333
763	495															478.857	546.857
765	676.5															481.5	550
771.5	636															482.5	395.5
781.6	640															482.667	508.333
788.714	626															482.667	516
794.5	619															483	519
800	752															483	554
809	659															484.667	391.667
110.5	598															485.2	711.4
165	563.5															484.5	870.5
174	748															485	469
198	827.5															485	499.5
202.5	764															486	557
294	549															486	698
493	624															487	457
506	583															488.5	463
531.5	597															488	704
552.5	408															491.2	864.6
559.5	360															491	449
566.5	363															491	846
569.2	723.4															492	387
577	400															495.429	444.714
586	741															494.5	562
586	744															495	496
587	468															496	517
593	532															498.333	521.333
601	519															499	574
638	689															501	440
651.333	702.667															501	497.5
658.333	669.667															501	523
661.714	671.143															503	439
667	673.4															505	501.4
668	676															504	523
672.889	676.778															511	721
707.667	744.333															515.2	793.4
720	679															515	595
721	705															516	511
722.8	707.2															518	822
721	753.5															520	822
722	677															522	259
724	712															523.5	822
725	696															524.5	813
726.2	718.4															526	260.125
726	710.5															529	686
728.5	725															532	799
731	719															534.333	837.333
791.5	880															535	844.857
808	897															536	415
836.333	894.667															537	636
837	807															539	646
35	669															540	640
115	795															546	644
152.5	533															547.333	693.667
152	824															551	642
159.5	803.5															551.667	646.667
159	536															554	709.5
167	733															560	714
168	794.5															560	717
173.5	829															562	717
182	753															567	784
193	558															567.5	869
216.667	498.333															569	272
239	707															569	720.5
241.2	841.4															571.5	783.5
243	568															577.3	783.3
245	658															577	867
248	661															577.5	714
251.5	833															577	780
258	662															581	280.5
261	667.75															583	490
264	660															603.5	407
263.5	663															606.5	692
263.5	755															606.5	769.5
263.5	824															609	432
265.333	575.333															610	532.5
267	667.857															611	523.5
267	762.714															613.333	512.333
268.667	547.333															618	649
273.333	502.333															624	680
280	633															624.5	750
281	777															625	492
281	781															625.833	631
293	787.75															629	613
293.5	642															629	789.5
296.5	618.5															632.2	323.6
300.5	613.5															650	379
307.333	655.667															657	272
317.778	602.778															670	342
328.5	750															677	564
329.5	651															683	629.25
344.167	597.833															694.5	556
344.8	732.6															695	671
346	792															697	255
349.889	559.667															698.667	785.333
350.667	566.5															699	626
358.429	593.714															699.667	633.667
364	410															699	639
370.5	593															702	612.25
374	576.25															703.667	627.167
382	555.75															704.333	631.333
383.5	552.5															709	260
383.5	785															721.5	808
386	845															728.667	886.333
395.9	652.8															729	451
396	658.5															748	479
396	833															253	603
400	463															264	674
403	551															284.8	336.8
408.667	597.333															287.5	342.5
426.2	306.6															289	546
436.5	779															394.5	491
438	716															396	488
440	746															399.5	483
441.2	828.4															414	553
444	828															417	554
448	771															426.333	557.667
454	746															429.5	560.5
457.5	670															436.5	634
464.833	765.333															442	637
470	752															442	563
477.5	677															443	639
491	866.5															446	530
500	860															447.2	643.2
501.5	587.5															447	571.5
502.286	788.429															448	533
503	582															449	576
504	580															449	578
504	695															450	567
508	497.25															451	520
512.5	806															452	763
513.5	655															462	569
514	564															466	566
516.5	716															468	557.5
518	640.5															468.5	697
519.5	608															468	757.5
521.875	603.125															468	760.5
521	654															471.5	534.5
521	745															474.375	530
523	606															475	573.25
528.5	816															482	762
529	640															484.6	574.4
533.333	542.667															490	574
533.5	650															490.5	793
540.5	581															493.5	574
548.667	557.333															497	714
552.25	638															499.5	529
554	543															500	573.5
556.5	705															504	573
559	654															513	519.5
559	704															526	809
561	544.75															538	667
561	643.714															540	803
561.167	658.167															543	819
561.5	516															546	680
562	639															551	695
569	773															554.5	479
570.5	643															554	696
572.857	726.143															561	946
571.667	862.667															562	712
576.5	583															590	525
576.8	768.2															591	578
593	679															615	662.8
601.5	719															653	516
605	664.5															655	516
605	719.75															680	803
607	597															696	669
608	650															698	666
611	584.5															700.5	613
616.5	606															702	621
617	711															703.333	625.667
619.667	609.667															706	568
620.5	819															710	626
626	702.857															712.167	615.167
626	717															726.5	583
632.8	704															739	509
639.8	718.6															298.5	362.5
645	690.5															320	539
648	756															333.8	618.6
649	637															349.667	550.333
653	677															356	561.5
657	775															361.667	588.333
658	791															389	611
659.5	785															406.125	618.125
660.5	709															421	626
663.333	548.667															433	635
670	810															434	641.5
671.5	589															437	638
671	828															437	739
671.667	834															447	647
673	679.5															464	755.5
674	736.25															483	437
673.667	838.333															575	551
675.5	760															587	988
677	856															599	558
678.5	687															599.5	687
679	591															626.5	618
680.667	606.222															665.2	557.6
679	709															670	615
681	595															690.5	591
682.5	765															693.4	593.2
686.667	607.111															694	587.5
687	698.5															696	554.5
687.667	709.667															702	895
689.2	602.4															355	651.5
689	773															361	515
692.6	711.1															363.333	809.667
691.833	607															398	624
691	706.5															399	652
702	770															429.5	630
703.5	733															432.75	669
704	715															432.667	676.333
705.333	771.667															435.5	662
709.5	649															436	654
710	551															443	956
710	733															468	619
712	540															471	695.5
716.5	588															472	686
718	734															483	633
718.5	777															486.857	679.286
720	546															489	512
721.8	777.6															500	808
724	550															512	664
725.333	530.333															541.5	610
728.5	329															551	429
728	556.5															552	664
734	647.5															559.667	613.333
738	781															569	652
742	710															579	687.5
742.5	759															632	633
745	724															637	548
748.5	783.5															678	599
753.25	756.625															685	665
751.5	787.5															284	852
761	657.75															287	795
761	441															322.5	545
762	730															324.5	541
768.889	741.111															328	538.5
768.5	746															329.5	827
769	583															334	480
774	461.25															346	602
787.5	745															350	602
789.333	742.333															363	642
804.714	631.429															379.5	712.5
850.75	807															397.5	728
103.5	587															413.875	732.875
117	572															417	489.5
123	527															427	667
132.333	627.667															430.5	688
133.5	782															445	749
137.667	608.333															450	668
148	717															450	711
154.111	714.778															450	746
181	605.75															454.5	712
191	724															466	677
197	395.7															496	323
196.5	743.5															523	709
198.5	674															567.5	563
198.5	677															570	673
203	396															596	574
204	400															604	299
208	397.667															605.5	778
213.333	399.667															612	582
213.5	402.5															616.667	551.333
215	768.5															618.625	443.25
215	811															625	310
216.333	773.667															627.5	579
217.5	777.2															629.25	459
216	816.5															631.5	640
217	403															648.5	361
217.5	645															652	812
218	822															664	856
220.333	505.667															668	684
220.667	796.667															686	456
222	779.571															738	760
224.286	826.429															391.667	653.333
225.5	781															396.75	422.625
227	650															394	582
230.5	373															400.333	417.667
232	796															402	425.5
234.5	386															411	659
235	388															419	690
235	648															420	625
240	572															424	663
256	524															434.5	530
262	500															442	472.5
263	472															450.125	420.875
263.571	609.286															456	566
266.5	472															463	568.5
266.5	611.5															526	669
266.5	712.5															528	521
268	609															558	679
267.5	721															570.5	588.5
267.667	843.333															573.5	580.5
268.8	547.6															580	832
273.5	610.5															587	397
278	733															595	563
283	612															638.5	868
287	638															647.25	877
290.333	632.333															647.667	883
291	304.5															649.5	741
291	681															650	713
299.5	434															650	715
300.5	644															650	737
305	696.8															650	754
305	444.5															653	751
304.333	644.667															653.5	871.5
307.5	643															656.6	685.2
308	699															659	664.5
309	701															660.571	653.714
312.222	445.556															660.5	668.5
312.333	478.667															660	671
314.333	576.667															663.5	635
315	361															663.5	638
315.75	682.75															663	645
328	683.5															666.5	624
329	629															363.2	432.6
331.286	633.286															365.5	435.333
332	662															371.667	402.333
333.5	630.5															372	437
336	629															374.5	489
337.5	637.5															378	402
337	654															378	844
341.1	434.1															385	486.5
341.833	636.833															387	483
343.5	641.333															388.5	489
343	652															391	447.5
348	640															397	520
351.5	630															398.5	451
352.8	507.6															402.375	454.125
354.333	593.667															408.333	455.333
359	439															408	532
360	387															412.5	457
361	520.5															418.125	458.875
361.667	643.333															425.75	538.5
364	437.111															428.5	463.333
363.5	740															429	542
364.8	643.6															431.5	465
364	718															435	466.5
370.5	438															440	467.5
372	415															438	491
373	516															456.6	477.2
373.5	804															459	596
374	802															460	586
377	408.5															461.667	598.333
377	446.5															466.714	482.571
379.286	797.143															466	600.667
381.2	837.6															468	496
382	403.5															468	603
385	796															469.5	517
396	517															470.25	521
400	663.5															471.667	500.333
400.5	519.5															473	539
401	638															473	613
404.286	664.571															484	490.5
407.667	639.333															483	623
413.5	673.5															488.167	493.167
415.333	411.667															499.5	566
415	534															502	578
417	695															502	800
424	631															503	587
423.5	639															505	587
426	555.5															531.5	529
428.7	635.8															531	749
428.5	560															556	473
428.5	644															559	474
432.556	633.556															582	486.25
433.5	642.5															582.667	568.5
434.2	679.4															588	496
439.25	646															589	724
440	797.5															594.2	570.4
443	789															595	506
444	640															597.5	571.5
449.5	645.5															598	512
451.5	535															600.5	805
451	562															601	518.5
453.2	645.4															603.5	526.5
456	574															604	544
457	863															604	730.5
460	702.833															605.5	563
460	495															605.667	737.667
460.5	682															606	543.5
463.5	704.5															607	561
467.667	560.667															611	561.833
470	589															611.5	739
471.5	642															612	750.25
476.333	503.667															612.5	729
480.5	826															614.5	717.5
482	672															615.333	731.833
484.333	825.667															616	749.5
490	826.778															617	568
489	494															617.5	719.5
491	672															618	692
493	581															620.667	684.889
495.25	742.625															619	689
494.5	731															620	599.5
495	825.75															622.375	714.25
500.8	499.4															621.556	706.222
506.667	731.333															625	637
506.667	758.667															627	619
509.833	683.833															649.571	625.714
509	730															658	630
512.5	502															662.143	624.143
514	455															661	628.5
515.333	653.667															664	358
516	726															670.333	784.333
519.167	655.167															674	476.5
520.5	796															678.5	619
523.5	453															685	626
533	793.25															691.5	621
541	335															699	384
545.429	336.714															719	438
547	790															725	370
549	539															728	341
549.5	798.5															732	412
555	792															742.5	473.5
555	796															357	500
556	513															380	506
557	681															382	506
560.5	793															396.111	718.556
567.5	746.5															406	492
570	767															456	647
572	793															465	537.5
579.25	350.25															512	601
578.5	836															569.5	596
580	695.75															598	631
581	791															605.833	564.667
583.889	761.333															612	730.75
586.5	790.5															612.25	592
591.8	672.4															614	550
592	772															614	569.5
594.5	669															614	577
596.333	540.667															614.5	595
596.8	700.6															614.4	614.8
599.5	782.833															614.5	634
604.5	676.5															614.5	698
612	630															616	600.4
617.667	636.333															616.5	648.5
619	629.5															617.333	596.333
622	686															617	660
624.5	725															617.833	695.167
629.5	774															618.5	625.5
636	778															618	645
637	570.5															619	676
639.5	735.5															620.5	645.5
640.333	725.667															620.222	633.556
641.5	728															621	599.5
643	698															621.25	651
643.5	700															622.4	657.2
646.667	696.222															623	611.5
649	668.75															623.5	633.5
648.667	688.667															624	608
650.8	598.6															624	615.5
651.5	728															624	663
651	742															625.833	640.833
653	673.5															626	658.5
658.375	794.625															625	684
658.4	370.4															627.667	680.667
659.333	601.667															628	676.5
661.8	705.6															629.5	631
661.8	728.6															631.5	626.5
662	761															634.667	631.444
663	759															635	604.5
664.333	740.667															637.667	593.333
670.4	690.2															637	597
671	474															638.667	634.667
671.5	693.5															638	709
674	735															642	579
673	760.5															643.25	585.25
683	735															643	638
685	595															645	692.25
685.5	688.5															647.25	688
686.5	712															650.667	682.667
687.125	731.875															372	496.5
689	690.5															537	508
695	719.5															551.5	894
697.5	598															559	904
702	904															596	497
703.667	678.333															598	497
705.5	620															598	521
706	623															602.5	475
707	609															635	576
707	625															638	572
709.8	706.6															652	659
712	790															657	644
713	647															659.5	621.5
713.5	677															665	626
717	657															371	536.5
718	711															588.5	923.5
719.667	662.333															591.667	913
723.5	701.5															591.5	923
725	565															594	911
730	764															596	911
732.5	777															610	919.75
746.5	599.5															612	914.5
752	593.5															613	912
756	515.333															615	908.5
755	612															618	819
756	688															618	906
760	635															619.5	822.5
765	465															622	827
774.9	651.1															624	829
783	689.5															627	832.25
786.333	772.333															626.5	880
798	927															626.5	896.5
799	923															627.333	887.667
799.5	933.5															627	894
805.111	884.222															629	706
807.5	608															629	837
809.5	883															629	840.5
845	786															688	706.5
32.5	808															289	407
45.4	739.4															333	569
44.5	763															336	570
47	762.5															377.333	594.333
63.5	722															387	774
69.5	774															390	468
87	576															401	611.5
105	878															402.6	621
118	510															402.5	631
124	568															407.5	633
125	892															408	563
129.667	654.667															410	625
130	669															417.667	630.333
130	924															420	631
139	675.5															422	634
146	829															430.5	638.5
153	877															434.2	640.6
169	476															439.2	642.6
187.5	594															440.286	646.857
190	474															438	669
192	879															439	827
204	334															441	652
207.625	325.5															442.333	670.667
208	892															446	672
215	308.5															449.5	655.5
216	306															449	664.5
217	303.5															450.667	671.667
218	301															457	673
220	296															470	669
220	417															479	670.6
221.5	441															478	674
221	887															485.5	648
222	291.5															541.667	829.667
226	281.5															543	833.5
229	923															587	705
232.5	276															589	706
234.333	271.333															607	699
[truncated: 2,738 more rows]
