# Supplementary material for: Spinal lumbar dI2 interneurons contribute to stability of bipedal stepping
Source: eLife. 2021 Aug 16;10:e62001. doi: 10.7554/eLife.62001 (PMC8448531; doi:10.7554/eLife.62001)
Supplement: Figure 6—figure supplement 1—source data 1. — The left-right phase of the control and TeTX-treated chicks (Figure 6—figure supplement 1). [file elife-62001-fig6-figsupp1-data1.xlsx]

## Sheet: TeTX5
273.214
217.895
251.429
163.636
205.714
293.333
153.893
152.92
220.99
158.532
181.593
180
194.862
213.559
167.797
178.407
173.077
150.411
125.66
116.308
127.742
133.714
133.483
195.429
170.847
185.455
173.455
168.44
176.897
183.776
137.528
147.789
175.068
185.714
182.4
243.692
261
181.714
228
160.777
200
183.462
216.541
138.795
154.8
173.617
165.714
236.842
164.885
202.953
175.135
127.059
102.222
225.634
141.702
142.105
76.8539
272.477
187.545
233.407
166.5
178.667
238.605
145.714
188.571
169.811
207.529
200
255.19
215.023
193.5
256.154
293.592
160.51
149.703
175
203.377
191.803
205.714
178.626
160
195.14
234.419
61.1321
195.319
171.064
129.16
169.091
207.273
171.94
163.019
132.816
178.487
184.538
198.72
255.484
186.792
162.295
174.066
155.229
199.688
180
180
209.67
124
169.043
173.233
145.946
199.024
147.097
169.157
210.265
146.667
171.089
216.923
193.846
169.587
192.99
167.244
209.67
182.278
147.857
180
160.941
184.186
175.135
195.789
184.463
204.878
201.758
169.655
195
199.059
174.375
189.474
177.778
198.857
186.977
192.558
190.244
195.211
166.154

## Sheet: TeTX4
192.96
133.714
148.235
261.818
124.444
150.545
175.714
196.744
163.636
155.676
195.517
102.385
171.429
247.229
116.129
156.706
223.784
232.615
168.312
172
168
168
161.053
249.505
174.433
136.957
224.151
193.5
158.049
123.75
180
197.053
213.488
192
153.708
56.3855
194.118
163.125
207.692
168.889
163.636
191.489
182.466
167.01
171.148
193.171
279.31
171.429
170.182
114.545
164.571
198.806
214.839
175
187.66
206.471
187.826
157.5
202.105
192.857
217.358
150.545
205.116
127.895
159.429
188.911
182.535
188.571
185.455
219.661
80
180
204.878
213.333
196.8
230.4
197.802
196.981
190.189

## Sheet: TeTX3
212.239
174.316
170.323
192.857
197.143
194.824
169.157
169.2
197.705
201.951
145.385
183.396
167.82
199.223
189.677
167.143
167.442
192.727
153.529
192.475
163.902
173.933
177.831
165.6
177.049
222.282
240.811
182.278
177.722
183.333
188.852
148.696
190.588
189.89
142.941
185.684
167.143
150.38
154.286
190.843
171.429
177.143
204.545
188.182
192.233
148.696
174.316
172.8
120
167.143
154.286
178.182
185.625
102.857
164.409
160
211.304
171.818
172.174
226.517
183.396
185.294
176.25
187.826
233.684
178.435
148.8
122.927
158.4
162
125.581
169.412
138.947
185.567
177.465
151.875
189
177.049
271.579
225
201.951
170.526
231.045
230.164
197.838
171.94
208.125
205.714
188.571
232.066
165.176
198
292.987
177.662
144.706
216
268.138
154.286
162
163.636
228.785
199.459
56.5022
189
180
126.486
155.676
178.605
168.312
211.765
209.739
142.703
200
204.094

## Sheet: TeTX2
192.727
145.823
216
273.6
207.123
185
170.526
146.441
171.22
206.341
185.625
177.882
186.667
216
226.452
149.268
289.18
217.241
196.923
193.043
163.636
82.7027
123.75
164.118
165.6
193.846
172.8
153.659
187.826
180
317.045
147.273
126
159.344
142.222
97.5
164.746
180
174.706
267.273
198.367
190.909
226.452
176.727
189.474
189.73
166.567
232.941
59.1914
203.226
229.655
180
177.143
253.636
167.525
193.5
187.826
150
173.077
174.706
165
157.5
162.74
204
195.882
176.424
133.608
135
155.077
203.226
153.333
167.586
198.857
198.75
169.412
180
212.459
195
185.294
205.714
165.246
194.595
175
188.129
227.755
211.765
166.154
156.774
228.571
200.656
168.44
225.634
195.429
196.364
128.571
204
174.706
158.4
211.765
195.115
196.364
149.434
207.887
183.673
186.429
160
194.595
176.4
147.815
175.135
214.615
221.538
211.935
131.429
163.385
200
168.312
193.333
201.818
138.462
175.385
183.6
186.977
180
177.049
214.177
200.769
147.6
186.316
172.174
145.161
221.538
177.6
174.545
153.846
182.466
154.286
163.256
152.113
190.08
210
168
212
145.714
201.429
149.61
219.74
186.569
200
192.329
195.728
172.059
165
151.071
218.571

## Sheet: TeTX1
170.4
222.489
330.83
259.794
168
198.72
201.176
171.429
185.684
181.978
168.889
180
265.714
177.722
228.214
190.588
189
308.571
171.628
76.3636
177.6
290
206.946
115.472
54.5255
155.122
187.397
164.409
194.516
172.5
166.154
181.935
132
152.727
182.857
182.278
191.842
160.615
234
32.3596
152.113
205.714
175
198.557
212.936
147.13
149.577
171.089
193.171
164.86
181.333
180
195.652
187.347
236.25
192
182.769
190.588
150.216
176.842
156.522
230.562
173.793
162.353
196.364
116.203
128.333
227.812
183
183.673
187.826
180
173.13
185.684
224.662
185.143
177.831
168
171.429
202.718
168.44
218.028
173.793
129.438
211.765
165.176
197.419
164.681
167.5
142.388
146.796
172.5
193.846
185.347
172.562
185.347
187.283
189.474
196
186.207
180
176.842
183.462
189.89
180
182.769
221.538
180
183.462
164.051
162.295
189.643
216
180
175.046
196.875
198.621
168.284
148.235
185.347
144
173.793
260.69
184.954
205.714
180
182.687
177.662
181.682
172.174
171.429
183
171
197.647
186.545
226.667
200
174.118
211.765
236.026
210
194.754
184.696
145.532
168.75
175.135
186.429
162
270.448
213.6
209.118
173.333
180
113.793
187.2
189.153
174.375
209.362
214.468
219.74
220.645
175.221
212.727
119.469
151.948
146.165
181.714
186.102
171.29
237
242.791
198.857
198.425
173.208
188.78
167.143
200.816
181.651
161.25
187.087
145.455
235.862
265.361
209.709
172.8
160.541
184.779
188
202.649
208.421
130.909
208.951
256.154
177.231
226.154
181.895
189.31
176.687
120
182.769
157.241
218.298
197.26
167.324

## Sheet: Control2
149.703
175.385
207
180
175.61
195.181
192.727
166.154
177.722
194.694
174.757
180
196.744
171.089
180
161.053
195.728
159.07
190.189
137.455
200
146.25
168
214.615
195.789
178.144
112
190.909
198.505
252.766
238.776

## Sheet: Control1
150
167.143
237.073
187.826
277.714
187.2
187.826
152.308
176.471
139.091
180
173.077
165
196.981
198.367
176.327
185.143
196.981
183.529
175.814
220.8
144
163.636
174.857
201.818
165
199.149
272.381
205.714
184.39
219.31
184.737
180
160.851
62.4277
138.462
175.61
223.714
200.455
166.829
211.765
148.235
225
184.39
117.209
159.545
200.93
130.213
199.149
195.652
184.186
186.667
176.17
210.732
137.143
176.327
180
180
191.02
222.857
177.931
152.877
168.98
113.684
173.494
188.308
191.02
246.316
284.211
174.545
213.75
69.6774
189.474
168
180
