# Supplementary material for: Spinal lumbar dI2 interneurons contribute to stability of bipedal stepping
Source: eLife. 2021 Aug 16;10:e62001. doi: 10.7554/eLife.62001 (PMC8448531; doi:10.7554/eLife.62001)
Supplement: Figure 6—source data 1. — The knee height trajectories during the normalized swing in all the analyzed steps of all chicks (Figure 6D). [file elife-62001-fig6-data1.xlsx]

## Sheet: Control1.xls
Session	Step	1	2	3	4	5	6	7	8	9	10	11	12	13	14	15	16	17	18	19	20	21	22	23	24	25	26	27	28	29	30	31	32	33	34	35	36	37	38	39	40	41	42	43	44	45	46	47	48
1	1	6.02804	6.03377	6.0395	6.03101	6.01599	6.00347	5.9952	5.98783	5.99575	6.00367	6.01805	6.03467	6.05641	6.08504	6.11507	6.15627	6.19746	6.22491	6.24884	6.27408	6.30073	6.32425	6.3321	6.33995	6.35554	6.37247	6.3796	6.37827	6.37876	6.38563	6.3925	6.39756	6.40244	6.40223	6.39853	6.39476	6.39084	6.38691	6.37166	6.35596	6.34027	6.32458	6.31411	6.31411	6.31437	6.3281	6.34183	6.35325
1	2	5.10851	5.13139	5.15428	5.17481	5.19427	5.21245	5.22847	5.24507	5.27155	5.29803	5.33287	5.37063	5.40996	5.4514	5.49312	5.53701	5.5809	5.63358	5.68851	5.74343	5.79836	5.85443	5.91622	5.97801	6.01349	6.04438	6.07054	6.09261	6.11326	6.12895	6.14465	6.15367	6.162	6.16598	6.16696	6.16597	6.15984	6.15371	6.14191	6.12989	6.12122	6.11435	6.11206	6.11893	6.1257	6.12741	6.12913	6.1324
1	3	5.31285	5.37505	5.43725	5.49621	5.55368	5.60865	5.65936	5.71024	5.764	5.81777	5.87396	5.93101	5.98714	6.04204	6.09639	6.14632	6.19625	6.24347	6.28999	6.33536	6.3795	6.42364	6.46778	6.51191	6.55313	6.59383	6.6319	6.6677	6.70263	6.73451	6.76639	6.79604	6.82546	6.85344	6.88041	6.90629	6.92934	6.95239	6.97072	6.98886	7.00478	7.0195	7.03257	7.04238	7.05213	7.0585	7.06488	7.0678
1	4	5.00197	5.09732	5.19268	5.28732	5.38163	5.47433	5.56428	5.65366	5.73335	5.81304	5.88505	5.95436	6.02037	6.08191	6.14272	6.19756	6.25241	6.30003	6.3458	6.38331	6.41191	6.43905	6.45883	6.47861	6.50156	6.52506	6.55286	6.58437	6.61489	6.64194	6.669	6.7008	6.73308	6.77312	6.81848	6.86555	6.91704	6.96854	7.0194	7.07024	7.11811	7.16438	7.20633	7.23968	7.27283	7.29531	7.31778	7.33416
2	1	6.43533	6.5602	6.68507	6.76659	6.82819	6.87891	6.91112	6.94394	6.98708	7.03021	7.05402	7.07106	7.08387	7.09096	7.09769	7.10161	7.10554	7.11557	7.12717	7.13707	7.14514	7.15254	7.15665	7.16077	7.16129	7.16118	7.1583	7.15301	7.14747	7.14102	7.13457	7.12121	7.10713	7.08864	7.06709	7.04547	7.02364	7.00181	6.98142	6.96109	6.9423	6.92434	6.90726	6.89196	6.8767	6.8634	6.85009	6.84327
2	2	5.56587	5.58774	5.60961	5.63888	5.67155	5.70813	5.75136	5.79521	5.84953	5.90385	5.95835	6.01292	6.06923	6.12791	6.18726	6.25208	6.31689	6.38985	6.4649	6.54586	6.63319	6.71824	6.79192	6.8656	6.92766	6.9877	7.04481	7.09939	7.1501	7.18728	7.22447	7.24648	7.26695	7.2763	7.278	7.27165	7.24436	7.21708	7.18979	7.1625	7.13521	7.10792	7.08063	7.05334	7.02605	6.99876	6.97147	6.95138
2	3	5.51553	5.5974	5.67927	5.76195	5.84501	5.92637	6.00488	6.08271	6.14911	6.21552	6.2784	6.34006	6.39724	6.44841	6.49829	6.53786	6.57743	6.60559	6.63084	6.65224	6.6695	6.68623	6.70036	6.71448	6.72738	6.74007	6.75364	6.76797	6.78539	6.81363	6.84188	6.86678	6.89134	6.91226	6.93068	6.9491	6.96752	6.98595	7.00437	7.02279	7.04121	7.05963	7.07748	7.0942	7.11063	7.11199	7.11335	7.10752
2	4	5.31375	5.41694	5.52013	5.61213	5.69898	5.78123	5.85564	5.92958	5.99547	6.06136	6.1259	6.18995	6.25336	6.31589	6.37738	6.4306	6.48381	6.51706	6.5452	6.57335	6.60149	6.62926	6.65515	6.68104	6.7051	6.72884	6.75193	6.77444	6.79599	6.81415	6.83232	6.84607	6.85937	6.87344	6.88802	6.91106	6.95609	7.00112	7.04995	7.09894	7.14548	7.1907	7.2337	7.27228	7.31073	7.34194	7.37315	7.40275
2	5	5.43665	5.46479	5.49293	5.52503	5.55894	5.59462	5.63332	5.67224	5.71488	5.75752	5.80184	5.84675	5.89127	5.93528	5.97894	6.01988	6.06081	6.09604	6.12981	6.16587	6.2044	6.24305	6.2823	6.32155	6.35944	6.3971	6.43102	6.46172	6.49185	6.51994	6.54803	6.58081	6.61407	6.65021	6.68833	6.72524	6.75901	6.79278	6.81893	6.84479	6.86787	6.88945	6.90994	6.92826	6.9465	6.96083	6.97516	6.98498
3	1	6.1533	6.1533	6.1533	6.17292	6.20157	6.24643	6.31884	6.3897	6.43407	6.47844	6.51704	6.55363	6.5935	6.63779	6.68185	6.72417	6.76649	6.8069	6.84682	6.86214	6.85095	6.83742	6.81219	6.78696	6.75582	6.72365	6.69265	6.66267	6.63286	6.60365	6.57445	6.53894	6.50279	6.4665	6.43013	6.39441	6.3604	6.32639	6.31058	6.29548	6.28685	6.28173	6.27756	6.27528	6.27303	6.27232	6.27161	6.27071
3	2	6.6953	6.71338	6.73145	6.73015	6.71995	6.70714	6.68989	6.67331	6.66821	6.66312	6.65754	6.65178	6.64488	6.63642	6.62848	6.62475	6.62101	6.62557	6.63225	6.63844	6.64408	6.64961	6.65454	6.65948	6.66286	6.66597	6.66763	6.66803	6.66865	6.67004	6.67143	6.67833	6.68579	6.69591	6.70787	6.72034	6.73412	6.7479	6.7598	6.77164	6.78116	6.78944	6.79668	6.80185	6.80697	6.80876	6.81055	6.80638
3	3	6.06678	6.0771	6.08742	6.10168	6.11775	6.13505	6.15445	6.17348	6.18627	6.19906	6.20857	6.21693	6.2238	6.22865	6.23301	6.23353	6.23404	6.23056	6.22605	6.22081	6.21477	6.2087	6.20251	6.19632	6.19845	6.20204	6.20841	6.21719	6.22708	6.24089	6.2547	6.28478	6.31651	6.35146	6.38861	6.42577	6.46292	6.50008	6.53723	6.57438	6.60712	6.63745	6.66619	6.69176	6.71731	6.74208	6.76685	6.78135
3	4	6.44388	6.52266	6.60145	6.67243	6.73983	6.79703	6.83692	6.87686	6.91791	6.95896	7.00128	7.04404	7.07974	7.10592	7.13169	7.15417	7.17665	7.20084	7.22546	7.24988	7.27407	7.29808	7.32119	7.3443	7.35549	7.36461	7.36948	7.3707	7.37153	7.37103	7.37054	7.36978	7.36899	7.36799	7.36683	7.36521	7.36235	7.35948	7.35507	7.3506	7.34739	7.34487	7.34284	7.34181	7.34079	7.34049	7.34019	7.34027
3	5	6.15364	6.15336	6.15309	6.17731	6.21278	6.23107	6.22013	6.20904	6.19524	6.18143	6.17856	6.17951	6.17855	6.17499	6.17186	6.17209	6.17232	6.19442	6.22211	6.25623	6.29726	6.33627	6.3652	6.39412	6.4144	6.43317	6.4469	6.45628	6.46395	6.46561	6.46728	6.46743	6.46743	6.46743	6.46743	6.46743	6.46743	6.46743	6.46743	6.46743	6.46869	6.47062	6.47521	6.48513	6.49529	6.51797	6.54065	6.57051
3	6	5.87389	5.90587	5.93785	5.96935	6.00062	6.03375	6.07005	6.1069	6.1533	6.1997	6.25013	6.30196	6.35261	6.40168	6.4505	6.49735	6.5442	6.58986	6.6352	6.67749	6.71647	6.75338	6.7799	6.80643	6.82039	6.83216	6.83596	6.83288	6.82926	6.82379	6.81832	6.81048	6.80241	6.79334	6.78357	6.77373	6.76369	6.75365	6.74208	6.73045	6.72258	6.71675	6.71388	6.71692	6.7201	6.73085	6.74159	6.7542
3	7	5.75298	5.75298	5.75298	5.74905	5.7433	5.74008	5.74114	5.74269	5.7524	5.7621	5.77619	5.79182	5.80996	5.83148	5.85519	5.89643	5.93767	5.98906	6.04305	6.09746	6.15231	6.20634	6.2562	6.30606	6.35103	6.39515	6.43604	6.47414	6.51075	6.54213	6.57351	6.59944	6.62481	6.64852	6.6711	6.69354	6.71564	6.73773	6.75982	6.78191	6.804	6.82609	6.84818	6.87028	6.8923	6.91096	6.92962	6.94604
3	8	5.74581	5.76004	5.77427	5.79217	5.81176	5.83053	5.84791	5.86567	5.88986	5.91405	5.93923	5.96476	5.99297	6.02479	6.05685	6.0908	6.12475	6.15886	6.193	6.22953	6.26865	6.30752	6.34515	6.38279	6.41435	6.44485	6.47309	6.4994	6.52632	6.55542	6.58452	6.61157	6.63841	6.66083	6.6802	6.69963	6.71922	6.73881	6.76273	6.78682	6.8144	6.84387	6.8759	6.91306	6.95019	6.9865	7.0228	7.05677
3	9	5.54378	5.54378	5.54378	5.55346	5.56758	5.5824	5.5984	5.6147	5.63598	5.65725	5.68048	5.70439	5.72838	5.75248	5.77599	5.79474	5.8135	5.82477	5.83413	5.8434	5.85257	5.8627	5.87763	5.89256	5.90846	5.92453	5.94059	5.95666	5.97391	5.99528	6.01666	6.04024	6.06405	6.08577	6.10606	6.12712	6.15024	6.17335	6.20537	6.23773	6.27303	6.30993	6.34544	6.37818	6.41081	6.43777	6.46474	6.49332
3	10	6.21706	6.22822	6.23937	6.25366	6.26939	6.28435	6.29802	6.31215	6.33419	6.35622	6.38018	6.40482	6.4277	6.44822	6.46883	6.49022	6.51161	6.53361	6.55576	6.57591	6.59389	6.61107	6.62421	6.63735	6.65019	6.66298	6.67516	6.68681	6.69828	6.70914	6.72001	6.72705	6.7337	6.74171	6.75065	6.7606	6.77317	6.78573	6.80236	6.81914	6.84077	6.86503	6.89013	6.91692	6.94374	6.97283	7.00192	7.03039
4	1	6.17063	6.18022	6.1898	6.19547	6.19935	6.20268	6.20506	6.20744	6.20964	6.21185	6.21242	6.21242	6.21242	6.21242	6.21242	6.21242	6.21242	6.21242	6.21242	6.21318	6.21477	6.21735	6.22491	6.23248	6.24004	6.24761	6.25518	6.26274	6.27031	6.27787	6.28544	6.29684	6.30862	6.33136	6.36162	6.38993	6.41316	6.43638	6.4591	6.4818	6.50449	6.52719	6.54989	6.57259	6.59528	6.61798	6.64068	6.64889
4	2	5.82827	5.84117	5.85407	5.8671	5.88017	5.89416	5.90971	5.92539	5.94348	5.96157	5.97973	5.99791	6.01658	6.03591	6.05524	6.07459	6.09395	6.1133	6.13266	6.15187	6.17093	6.1898	6.20775	6.2257	6.2385	6.25041	6.26215	6.27377	6.28538	6.29699	6.3086	6.31986	6.33108	6.34128	6.35078	6.35883	6.36309	6.36736	6.36964	6.37185	6.37211	6.37131	6.36948	6.36561	6.36174	6.35787	6.354	6.35013
4	3	5.13535	5.22684	5.31834	5.40095	5.47948	5.55041	5.60841	5.66548	5.70665	5.74783	5.789	5.83017	5.87127	5.91227	5.95291	5.99074	6.02856	6.06346	6.0976	6.12953	6.15908	6.18752	6.21039	6.23327	6.25885	6.28491	6.31165	6.33897	6.36681	6.39648	6.42615	6.45958	6.49341	6.5319	6.5736	6.61871	6.67268	6.72666	6.77695	6.8271	6.87504	6.9218	6.96782	7.01238	7.05688	7.09805	7.13922	7.17904
4	4	4.8498	4.91138	4.97297	5.03455	5.09613	5.15304	5.20202	5.25025	5.28573	5.3212	5.35595	5.39043	5.42306	5.4532	5.48328	5.51297	5.54266	5.56873	5.59387	5.6164	5.63613	5.65564	5.67412	5.69259	5.72321	5.75595	5.79038	5.82626	5.86072	5.89021	5.91969	5.93973	5.95881	5.97534	5.99012	6.00695	6.02909	6.05124	6.07597	6.1008	6.1263	6.15217	6.17803	6.2039	6.22976	6.25563	6.28149	6.30297
5	1	6.42049	6.40975	6.39901	6.40816	6.42644	6.45392	6.49705	6.54028	6.58537	6.63047	6.67557	6.72066	6.76665	6.81383	6.86222	6.9202	6.97818	7.01813	7.05348	7.08648	7.11695	7.14985	7.19495	7.24005	7.27224	7.30219	7.32989	7.35566	7.38143	7.4072	7.43297	7.45368	7.47388	7.49356	7.51288	7.53221	7.55154	7.57086	7.59606	7.62148	7.64306	7.66257	7.67986	7.69275	7.70563	7.71851	7.7314	7.74428
5	2	6.31167	6.41875	6.52583	6.60952	6.68248	6.7486	6.8031	6.8573	6.90658	6.95585	6.99507	7.03076	7.05533	7.06491	7.07342	7.07342	7.07342	7.07342	7.07342	7.07342	7.07342	7.07342	7.07342	7.07342	7.07342	7.07342	7.07342	7.07342	7.07342	7.07342	7.07342	7.07342	7.07342	7.07125	7.0676	7.06297	7.05583	7.04869	7.04156	7.03442	7.02322	7.00981	6.99878	6.99251	6.98636	6.98636	6.98636	6.98636
5	3	6.41439	6.41128	6.40817	6.42165	6.44277	6.45685	6.45897	6.46124	6.46616	6.47107	6.4923	6.51924	6.53471	6.53471	6.53363	6.5239	6.51417	6.51219	6.51219	6.51137	6.50966	6.50532	6.48778	6.47024	6.4743	6.48211	6.48255	6.47665	6.47303	6.47743	6.48183	6.4796	6.47669	6.47551	6.47551	6.47498	6.47307	6.47117	6.47958	6.4884	6.48865	6.48425	6.48389	6.49161	6.49988	6.53749	6.5751	6.60856
5	4	5.82139	5.83387	5.84634	5.85755	5.86817	5.88081	5.89689	5.91332	5.93578	5.95824	5.9807	6.00316	6.02251	6.03766	6.05279	6.06776	6.08273	6.10048	6.11894	6.13781	6.15714	6.17449	6.18198	6.18947	6.19695	6.20444	6.21193	6.21941	6.2269	6.23439	6.24187	6.2481	6.25419	6.25667	6.25667	6.25667	6.25667	6.25667	6.25667	6.25667	6.25667	6.25667	6.25708	6.2583	6.25963	6.26712	6.27461	6.29165
5	5	5.93979	5.96168	5.98358	6.00942	6.03706	6.06487	6.09295	6.11893	6.10914	6.09935	6.08968	6.08005	6.0708	6.06208	6.05475	6.05856	6.06237	6.07009	6.07882	6.0924	6.1112	6.13097	6.15554	6.18011	6.20289	6.22535	6.22912	6.21677	6.20822	6.21294	6.21767	6.25061	6.28642	6.31974	6.35133	6.38462	6.42233	6.46004	6.4886	6.5168	6.53744	6.55398	6.56935	6.58239	6.5951	6.59068	6.58625	6.57315
5	6	5.77525	5.8002	5.82516	5.83994	5.85003	5.85869	5.8649	5.87109	5.87683	5.88258	5.88407	5.88407	5.89341	5.91535	5.93735	5.95981	5.98227	6.00473	6.02719	6.04965	6.07211	6.09457	6.11703	6.1395	6.16196	6.18442	6.19285	6.1892	6.18302	6.16805	6.15308	6.1381	6.12313	6.10815	6.09318	6.07821	6.06323	6.04826	6.03328	6.01831	6.0074	5.99869	5.99248	5.99127	5.98993	5.98244	5.97496	5.96747
5	7	5.24216	5.34896	5.45575	5.51418	5.5504	5.58369	5.61201	5.63969	5.6564	5.67312	5.67926	5.6817	5.68651	5.69452	5.70252	5.71053	5.71854	5.72655	5.73456	5.74257	5.75058	5.75859	5.7666	5.77461	5.77965	5.78418	5.78627	5.78627	5.78627	5.78627	5.78627	5.78627	5.78627	5.79061	5.79792	5.80543	5.81344	5.82145	5.82945	5.83746	5.84547	5.85348	5.86149	5.8695	5.8775	5.88516	5.89283	5.8951
6	1	5.74438	5.80566	5.86693	5.90845	5.94089	5.97166	5.99959	6.02708	6.04709	6.06709	6.0911	6.11651	6.14008	6.16116	6.18195	6.20033	6.21871	6.23709	6.25548	6.27386	6.29224	6.30918	6.31891	6.32864	6.33009	6.33009	6.33183	6.33507	6.34024	6.35213	6.36403	6.38377	6.40432	6.42999	6.45918	6.49048	6.52724	6.56401	6.60077	6.63753	6.6743	6.71106	6.74476	6.77234	6.79959	6.80986	6.82013	6.82394
6	2	5.65429	5.67231	5.69034	5.7108	5.73238	5.75693	5.78653	5.81594	5.84212	5.86831	5.89174	5.91422	5.93487	5.95306	5.97105	5.98746	6.00387	6.02013	6.03635	6.05188	6.06667	6.08103	6.09328	6.10552	6.11958	6.13396	6.15147	6.1717	6.19224	6.21386	6.23549	6.25758	6.27971	6.30316	6.32753	6.35263	6.37966	6.40669	6.43373	6.46076	6.48779	6.51482	6.54005	6.56168	6.58322	6.60027	6.61731	6.62711
6	3	5.63175	5.6738	5.71585	5.75054	5.78185	5.81006	5.83301	5.85635	5.88619	5.91603	5.94488	5.97339	6.00014	6.02453	6.04803	6.06433	6.08064	6.09611	6.11138	6.128	6.14607	6.16429	6.18321	6.20213	6.21929	6.23613	6.25114	6.26457	6.27782	6.29044	6.30305	6.31567	6.32828	6.34062	6.35275	6.36416	6.37364	6.38313	6.38956	6.39587	6.40217	6.40848	6.41371	6.41677	6.41978	6.41996	6.42014	6.42019
6	4	5.40648	5.46235	5.51821	5.56641	5.61108	5.64843	5.67332	5.69861	5.73075	5.7629	5.79874	5.83587	5.86867	5.89563	5.92241	5.94779	5.97317	6.00291	6.03375	6.06699	6.1028	6.13905	6.17749	6.21593	6.25494	6.29404	6.33161	6.36786	6.40237	6.43082	6.45928	6.48219	6.50454	6.52666	6.54862	6.5698	6.58892	6.60805	6.61917	6.62998	6.63705	6.6421	6.64546	6.64546	6.64538	6.64063	6.63588	6.63058
6	5	5.63692	5.65915	5.68137	5.73657	5.80691	5.88447	5.9743	6.06249	6.12266	6.18283	6.23794	6.29129	6.34463	6.39797	6.45106	6.50207	6.55308	6.58915	6.6214	6.64899	6.67157	6.69468	6.72039	6.74611	6.77264	6.79931	6.82599	6.85266	6.87907	6.90458	6.93008	6.95186	6.97325	6.99102	7.00629	7.019	7.02501	7.03102	7.03222	7.03324	7.03359	7.03359	7.03323	7.03215	7.03086	7.01824	7.00563	6.9896
6	6	5.51911	5.51911	5.51911	5.52307	5.52883	5.53674	5.54827	5.55956	5.56677	5.57398	5.58039	5.58652	5.59264	5.59877	5.60534	5.61543	5.62552	5.63877	5.65283	5.66827	5.68521	5.70336	5.7275	5.75165	5.7824	5.8143	5.84775	5.88253	5.91775	5.95452	5.99128	6.0287	6.06618	6.10538	6.14575	6.18661	6.22878	6.27096	6.30757	6.34398	6.37664	6.40728	6.43587	6.46038	6.48478	6.50353	6.52227	6.54076
7	1	6.21093	6.21093	6.21093	6.22602	6.24805	6.2741	6.30699	6.33994	6.37394	6.40794	6.44193	6.47593	6.50993	6.54392	6.57792	6.61192	6.64591	6.67808	6.70978	6.73126	6.74172	6.75138	6.75708	6.76278	6.7683	6.77379	6.78085	6.78925	6.79974	6.81753	6.83531	6.85021	6.86481	6.87659	6.88643	6.8956	6.90302	6.91045	6.92382	6.93741	6.9523	6.96789	6.98334	6.99852	7.01366	7.02665	7.03964	7.04901
7	2	5.01233	5.09572	5.17912	5.25471	5.32671	5.39546	5.45869	5.52154	5.57803	5.63452	5.68093	5.72382	5.76225	5.79468	5.82668	5.85527	5.88387	5.91468	5.94606	5.98987	6.04705	6.10237	6.1484	6.19443	6.23778	6.28067	6.32356	6.36644	6.40933	6.45222	6.49511	6.52724	6.55827	6.57918	6.59313	6.60359	6.60498	6.60638	6.61331	6.62046	6.62761	6.63476	6.64057	6.64371	6.64679	6.64679	6.64679	6.64679
7	3	5.76216	5.85514	5.94812	6.01989	6.08192	6.13787	6.18348	6.22886	6.27029	6.31173	6.34391	6.37285	6.39364	6.40344	6.41234	6.41397	6.41561	6.41686	6.41802	6.42433	6.43618	6.44831	6.4618	6.47528	6.48916	6.50311	6.51706	6.53101	6.54495	6.5589	6.57285	6.5986	6.62556	6.64956	6.67152	6.69076	6.70296	6.71515	6.71762	6.71971	6.72061	6.72087	6.72104	6.72104	6.72096	6.71671	6.71246	6.69893
7	4	5.44819	5.42726	5.40634	5.40734	5.41841	5.43579	5.46392	5.4923	5.52495	5.5576	5.60016	5.64619	5.69547	5.74915	5.80315	5.85963	5.91612	5.97212	6.02799	6.08114	6.13135	6.17748	6.2032	6.22891	6.24876	6.26759	6.28511	6.30149	6.31469	6.31678	6.31887	6.31939	6.31975	6.32106	6.32302	6.3258	6.33069	6.33558	6.34466	6.3539	6.36503	6.37717	6.38991	6.40384	6.41782	6.43502	6.45223	6.47426
7	5	5.23026	5.23026	5.23026	5.23997	5.25413	5.27237	5.29752	5.32305	5.35522	5.38738	5.4107	5.43093	5.45115	5.47137	5.49192	5.51503	5.53815	5.56554	5.59403	5.62828	5.66873	5.70734	5.73676	5.76619	5.79153	5.81616	5.83958	5.86196	5.88398	5.90473	5.92548	5.94964	5.97414	6.00228	6.03292	6.06493	6.1005	6.13607	6.17096	6.20583	6.23236	6.25437	6.27579	6.29601	6.31624	6.33702	6.3578	6.37978
8	1	5.92814	6.01493	6.10172	6.179	6.2519	6.3187	6.37511	6.43164	6.49004	6.54844	6.6016	6.65293	6.69903	6.73809	6.77594	6.80421	6.83248	6.85898	6.88501	6.91105	6.93709	6.96312	6.98916	7.0152	7.04013	7.06486	7.0868	7.10633	7.12776	7.15584	7.18392	7.21606	7.2486	7.28115	7.3137	7.34418	7.36929	7.39439	7.41413	7.43366	7.45318	7.47271	7.48908	7.49912	7.50898	7.50898	7.50898	7.49602
8	2	6.53793	6.56458	6.59124	6.61518	6.63787	6.65909	6.67781	6.69628	6.71041	6.72455	6.73414	6.74213	6.75013	6.75813	6.76548	6.76772	6.76995	6.7704	6.7704	6.7696	6.76792	6.76519	6.7572	6.7492	6.7412	6.73321	6.72521	6.71721	6.70921	6.70122	6.69322	6.68522	6.67723	6.66923	6.66123	6.6553	6.65474	6.65418	6.65416	6.65416	6.65416	6.65416	6.65416	6.65416	6.65416	6.65416	6.65416	6.65416
8	3	6.24086	6.26513	6.28939	6.30426	6.31481	6.32602	6.33836	6.3506	6.36113	6.37166	6.37439	6.37439	6.37597	6.3797	6.38438	6.39675	6.40911	6.42028	6.43114	6.44219	6.45345	6.46451	6.47455	6.4846	6.50319	6.52328	6.53797	6.54801	6.55806	6.5681	6.57814	6.60641	6.63654	6.66667	6.6968	6.72693	6.75706	6.78719	6.81732	6.84744	6.87757	6.9077	6.93114	6.94118	6.95122	6.96126	6.97131	6.97428
8	4	5.76589	5.79068	5.81548	5.85132	5.89224	5.93499	5.98087	6.02626	6.06345	6.10065	6.13785	6.17504	6.21224	6.24944	6.28601	6.31763	6.34925	6.36753	6.38241	6.40051	6.42209	6.4431	6.46133	6.47956	6.49493	6.50981	6.52469	6.53957	6.55444	6.56932	6.5842	6.59908	6.61396	6.62818	6.64194	6.65394	6.66138	6.66882	6.67626	6.6837	6.68897	6.69306	6.69579	6.69579	6.69579	6.69579	6.69579	6.69579
8	5	5.79374	5.82443	5.85512	5.89039	5.92777	5.9695	6.01859	6.06745	6.11208	6.15672	6.20135	6.24599	6.29775	6.35913	6.42019	6.47877	6.53736	6.59328	6.64851	6.69649	6.73667	6.77628	6.8131	6.84993	6.88675	6.92358	6.95681	6.98694	7.01582	7.04037	7.06492	7.06922	7.07145	7.07236	7.07236	7.07236	7.07236	7.07236	7.07236	7.07236	7.07236	7.07236	7.07236	7.07236	7.07236	7.07236	7.07236	7.07236
8	6	6.04438	6.11629	6.1882	6.2557	6.32116	6.37171	6.39687	6.4224	6.45402	6.48564	6.52979	6.57833	6.62212	6.6595	6.69513	6.7167	6.73827	6.75985	6.78142	6.80299	6.82457	6.84676	6.87206	6.89735	6.92407	6.95104	6.978	7.00497	7.03194	7.0589	7.08587	7.09394	7.10008	7.1061	7.11205	7.11935	7.13014	7.14092	7.15296	7.16505	7.17979	7.19597	7.21215	7.22833	7.24451	7.26069	7.27687	7.29305
[truncated: 78 more columns]

## Sheet: Control2
Session	Step	1	2	3	4	5	6	7	8	9	10	11	12	13	14	15	16	17	18	19	20	21	22	23	24	25	26	27	28	29	30	31	32	33	34	35	36	37	38	39	40	41	42	43	44	45	46	47	48
1	1	6.04678	6.03469	6.02259	6.0127	6.02421	6.03573	6.04907	6.07038	6.09169	6.115	6.14351	6.17202	6.19827	6.22073	6.24319	6.26533	6.2871	6.30887	6.33063	6.3524	6.37417	6.38807	6.39774	6.40741	6.41529	6.42255	6.4298	6.43706	6.44431	6.45157	6.45883	6.46608	6.47309	6.46963	6.46618	6.46228	6.45503	6.44777	6.44156	6.43932	6.43707	6.43697	6.4418	6.44664	6.45428	6.4662	6.47812	6.4935
1	2	5.72285	5.71306	5.70327	5.69443	5.69487	5.69531	5.69655	5.7013	5.70605	5.71155	5.71896	5.72637	5.73525	5.7466	5.75796	5.76949	5.78124	5.79299	5.80705	5.82295	5.83884	5.85762	5.87795	5.89828	5.91937	5.94073	5.96209	5.981	5.99944	6.01787	6.03555	6.05317	6.07071	6.0845	6.0983	6.1122	6.12686	6.14152	6.15631	6.17162	6.18693	6.20152	6.21442	6.22732	6.23976	6.25151	6.26326	6.275
1	3	5.72285	5.73379	5.74473	5.75603	5.77079	5.78556	5.80011	5.81377	5.82742	5.8421	5.85943	5.87676	5.89362	5.90968	5.92574	5.94059	5.95405	5.96751	5.97963	5.99069	6.00174	6.0122	6.02233	6.03247	6.04835	6.0662	6.08405	6.10345	6.12314	6.14284	6.16253	6.18223	6.20182	6.21692	6.23203	6.24691	6.26014	6.27337	6.28518	6.29163	6.29808	6.30126	6.29688	6.2925	6.28535	6.27395	6.26255	6.25113
1	4	6.69465	6.69465	6.69465	6.69559	6.70571	6.71583	6.72636	6.7387	6.75104	6.76341	6.77585	6.78829	6.80073	6.81317	6.82561	6.83932	6.8545	6.86968	6.8925	6.92138	6.95025	6.97383	6.99456	7.01529	7.03448	7.05314	7.0718	7.09046	7.10911	7.12777	7.14643	7.16509	7.18364	7.19771	7.21178	7.22462	7.22818	7.23173	7.23454	7.23454	7.23454	7.2358	7.23994	7.24409	7.25037	7.25992	7.26947	7.28024
2	1	6.00083	6.01072	6.02061	6.03078	6.04369	6.0566	6.07006	6.08599	6.10191	6.11827	6.13576	6.15325	6.1704	6.18699	6.20357	6.21849	6.2315	6.2445	6.25488	6.26317	6.27146	6.27649	6.27977	6.28305	6.27865	6.27159	6.26454	6.24572	6.22462	6.20351	6.17727	6.15065	6.12411	6.10079	6.07746	6.05499	6.039	6.02301	6.00778	5.99542	5.98306	5.96906	5.95125	5.93344	5.92154	5.91866	5.91578	5.91597
2	2	5.67351	5.69271	5.71191	5.73086	5.74726	5.76366	5.78007	5.7965	5.81292	5.82953	5.84663	5.86373	5.88044	5.8965	5.91256	5.92554	5.93497	5.94439	5.95177	5.95753	5.96329	5.96906	5.97482	5.98058	5.98545	5.99003	5.9946	5.9974	5.99985	6.00231	6.00516	6.00804	6.01102	6.01822	6.02542	6.03312	6.04464	6.05617	6.06769	6.07921	6.09073	6.10225	6.11377	6.1253	6.13682	6.14834	6.15986	6.17079
2	3	6.21904	6.21904	6.21904	6.21964	6.2261	6.23256	6.24243	6.26722	6.29201	6.31767	6.3456	6.37353	6.40146	6.4294	6.45733	6.48729	6.51958	6.55188	6.58349	6.61457	6.64564	6.67251	6.69712	6.72173	6.7457	6.76944	6.79318	6.82043	6.84836	6.87629	6.9026	6.92879	6.95485	6.9758	6.99675	7.01753	7.03708	7.05664	7.07352	7.08033	7.08714	7.09189	7.09189	7.09189	7.09189	7.09189	7.09189	7.09189
2	4	6.32815	6.35782	6.3875	6.41844	6.46168	6.50492	6.54765	6.58813	6.62861	6.668	6.70455	6.74111	6.77595	6.80789	6.83984	6.8672	6.88928	6.91137	6.92906	6.94329	6.95752	6.96676	6.97332	6.97988	6.98052	6.97913	6.97773	6.97332	6.96833	6.96334	6.95747	6.95153	6.9456	6.93966	6.93373	6.92779	6.92186	6.91592	6.90999	6.90405	6.89811	6.89218	6.88624	6.88031	6.87437	6.86844	6.8625	6.85657
2	5	5.74887	5.74887	5.74887	5.74887	5.74887	5.74887	5.74887	5.74887	5.74887	5.74963	5.75234	5.75504	5.75872	5.76405	5.76937	5.77506	5.78117	5.78728	5.79339	5.7995	5.80561	5.81172	5.81783	5.82394	5.83005	5.83616	5.84227	5.84695	5.85136	5.85577	5.85669	5.85734	5.85798	5.85798	5.85798	5.85804	5.85856	5.85909	5.86064	5.8661	5.87156	5.87958	5.89355	5.90751	5.92312	5.94123	5.95934	5.97756
3	1	6.32983	6.31552	6.30122	6.28728	6.27689	6.2665	6.25739	6.25381	6.25023	6.24661	6.24287	6.23913	6.23553	6.23214	6.22876	6.22959	6.23529	6.24098	6.24978	6.26103	6.27229	6.28632	6.30185	6.31737	6.33412	6.35128	6.36845	6.38561	6.40278	6.41995	6.43711	6.45428	6.47144	6.48861	6.50577	6.52294	6.5401	6.55727	6.57357	6.58659	6.59961	6.61011	6.61481	6.6195	6.62253	6.62301	6.62349	6.62164
3	2	5.68611	5.69584	5.70557	5.71516	5.72342	5.73167	5.74024	5.75012	5.76001	5.77033	5.78177	5.7932	5.80504	5.81754	5.83004	5.84433	5.86066	5.877	5.9007	5.93023	5.95976	5.99275	6.02759	6.06243	6.09592	6.12895	6.16198	6.19274	6.22305	6.25336	6.2818	6.3101	6.33828	6.36113	6.38398	6.40542	6.41609	6.42677	6.43535	6.436	6.43666	6.43652	6.43456	6.4326	6.42839	6.42074	6.41308	6.40347
3	3	5.47154	5.47154	5.47154	5.47195	5.47636	5.48077	5.486	5.49482	5.50364	5.51315	5.52447	5.53579	5.54724	5.55892	5.57059	5.58226	5.59394	5.60561	5.61728	5.62895	5.64063	5.65421	5.66882	5.68344	5.69832	5.71331	5.72829	5.74145	5.75425	5.76706	5.77922	5.79133	5.80351	5.81834	5.83318	5.84833	5.86584	5.88335	5.9002	5.91457	5.92894	5.94136	5.94931	5.95726	5.96437	5.97021	5.97604	5.98181
3	4	5.64416	5.62071	5.59725	5.57545	5.56984	5.56423	5.55958	5.55912	5.55867	5.56001	5.56602	5.57203	5.57842	5.58546	5.5925	5.60201	5.61437	5.62673	5.63449	5.63861	5.64273	5.64718	5.65182	5.65645	5.66288	5.66991	5.67695	5.6906	5.70553	5.72047	5.74115	5.76226	5.78338	5.80449	5.82561	5.84638	5.86458	5.88277	5.9001	5.91418	5.92826	5.94233	5.95641	5.97048	5.9868	6.00654	6.02628	6.05357
3	5	5.36426	5.37599	5.38772	5.39986	5.41606	5.43225	5.44809	5.4624	5.4767	5.49429	5.52039	5.54648	5.57334	5.60149	5.62964	5.65779	5.68594	5.71409	5.73947	5.76264	5.78582	5.81067	5.83641	5.86216	5.88331	5.90288	5.92245	5.94073	5.95875	5.97677	5.99767	6.01878	6.0399	6.06101	6.08213	6.1029	6.1211	6.13929	6.15662	6.1707	6.18478	6.1975	6.20712	6.21673	6.22329	6.22518	6.22706	6.23147
4	1	6.47071	6.48802	6.50532	6.52211	6.53396	6.54581	6.55823	6.57316	6.5881	6.60205	6.61347	6.62489	6.63673	6.64926	6.6618	6.67486	6.68852	6.70217	6.71338	6.72264	6.7319	6.73924	6.74555	6.75186	6.75823	6.76462	6.77101	6.77519	6.77894	6.7827	6.784	6.78512	6.78629	6.78972	6.79316	6.79656	6.79976	6.80295	6.80581	6.80741	6.80901	6.80998	6.8095	6.80903	6.80878	6.80886	6.80894	6.80788
4	2	5.90133	5.95522	6.0091	6.05967	6.07793	6.09619	6.11642	6.14524	6.17407	6.19886	6.21325	6.22763	6.24159	6.25482	6.26805	6.28128	6.29451	6.30774	6.3178	6.32536	6.33293	6.33628	6.33738	6.33849	6.34275	6.34811	6.35346	6.35987	6.36649	6.3731	6.38441	6.39606	6.40775	6.42098	6.43421	6.44744	6.46067	6.47391	6.48618	6.49484	6.5035	6.51155	6.51816	6.52478	6.53139	6.53801	6.54462	6.55124
4	3	5.90637	5.91608	5.9258	5.93581	5.94878	5.96175	5.97532	5.99154	6.00777	6.02434	6.04182	6.05931	6.07679	6.09427	6.11176	6.12924	6.14672	6.1642	6.18169	6.19917	6.21665	6.23414	6.25162	6.2691	6.28283	6.29528	6.30772	6.32293	6.33868	6.35443	6.36593	6.37712	6.38817	6.394	6.39983	6.40551	6.41008	6.41465	6.41826	6.41826	6.41826	6.41826	6.41826	6.41826	6.4162	6.411	6.40581	6.4003
4	4	4.75439	4.79185	4.82931	4.86575	4.89231	4.91887	4.94445	4.9657	4.98695	5.00971	5.03637	5.06302	5.08718	5.10713	5.12707	5.14884	5.17271	5.19659	5.22399	5.2542	5.28441	5.31467	5.34496	5.37524	5.40497	5.43451	5.46406	5.49319	5.52225	5.55131	5.58006	5.60879	5.63751	5.66603	5.69456	5.72289	5.74981	5.77674	5.80323	5.82807	5.8529	5.8765	5.89723	5.91795	5.93797	5.9569	5.97583	5.99373
4	5	5.14325	5.1394	5.13556	5.13178	5.1286	5.12543	5.12308	5.12436	5.12564	5.12673	5.12732	5.12791	5.12777	5.12641	5.12504	5.12412	5.12373	5.12333	5.12377	5.12488	5.12599	5.12818	5.13094	5.1337	5.13758	5.14186	5.14613	5.14947	5.15262	5.15578	5.15838	5.16095	5.16348	5.16481	5.16613	5.16742	5.1684	5.16938	5.17077	5.17366	5.17655	5.17948	5.18248	5.18547	5.18779	5.18907	5.19036	5.19129
[truncated: 78 more columns]

## Sheet: Control3
Session	Step	1	2	3	4	5	6	7	8	9	10	11	12	13	14	15	16	17	18	19	20	21	22	23	24	25	26	27	28	29	30	31	32	33	34	35	36	37	38	39	40	41	42	43	44	45	46	47	48
1	1	5.26163	5.26207	5.26251	5.26462	5.26842	5.27221	5.27623	5.28025	5.28403	5.28757	5.29111	5.29418	5.29724	5.30046	5.30383	5.30719	5.3118	5.31641	5.32182	5.32803	5.33423	5.342	5.34977	5.3584	5.3679	5.37739	5.38716	5.39694	5.40783	5.41984	5.43185	5.44407	5.4563	5.46851	5.48071	5.49292	5.50644	5.51997	5.53413	5.54893	5.56373	5.5782	5.59267	5.60658	5.61995	5.63331	5.64706	5.66082
1	2	5.293	5.29333	5.29367	5.29403	5.29441	5.29479	5.29521	5.29563	5.29606	5.2965	5.29695	5.29831	5.29967	5.30197	5.30522	5.30846	5.31315	5.31783	5.32252	5.32721	5.3319	5.33658	5.34127	5.34596	5.35065	5.35534	5.36002	5.36471	5.37048	5.37732	5.38417	5.39246	5.40076	5.40881	5.41664	5.42446	5.43036	5.43626	5.44155	5.44624	5.45093	5.45434	5.45776	5.45991	5.4608	5.46169	5.46267	5.46364
1	3	5.94132	5.94239	5.94347	5.94458	5.94573	5.94687	5.95321	5.95954	5.96473	5.96876	5.9728	5.97494	5.97709	5.97923	5.98138	5.98352	5.98567	5.98781	5.98996	5.9921	5.99425	5.99566	5.99707	5.99554	5.99108	5.98661	5.98876	5.9909	5.99295	5.99491	5.99686	5.99896	6.00106	6.00311	6.00511	6.00711	6.00892	6.01073	6.01397	6.01862	6.02328	6.03167	6.04007	6.04854	6.05709	6.06563	6.07415	6.08267
1	4	5.73276	5.7354	5.73804	5.74175	5.74654	5.75132	5.75627	5.76122	5.76643	5.7719	5.77738	5.784	5.79062	5.79776	5.80543	5.8131	5.82091	5.82872	5.83616	5.84323	5.85029	5.85689	5.8635	5.87067	5.87842	5.88616	5.89188	5.89759	5.90467	5.91311	5.92155	5.93284	5.94413	5.95614	5.96887	5.9816	5.99471	6.00783	6.02095	6.03408	6.04722	6.06035	6.07348	6.08662	6.09975	6.11288	6.12602	6.13915
1	5	5.8577	5.86808	5.87846	5.88953	5.90129	5.91306	5.92376	5.93445	5.94437	5.95352	5.96266	5.97113	5.9796	5.98822	5.99697	6.00573	6.01475	6.02377	6.03368	6.04447	6.05527	6.07329	6.09132	6.10934	6.12737	6.1454	6.16115	6.1769	6.19232	6.20742	6.22251	6.23646	6.25042	6.2631	6.27451	6.28592	6.29393	6.30194	6.30901	6.31516	6.32131	6.32741	6.33351	6.33934	6.3449	6.35047	6.35409	6.35771
2	1	5.2649	5.26833	5.27176	5.27502	5.27808	5.28115	5.28392	5.28669	5.28931	5.29179	5.29426	5.29648	5.29869	5.30082	5.30287	5.30492	5.30681	5.3087	5.3105	5.3122	5.3139	5.3155	5.3171	5.31866	5.32019	5.32171	5.32317	5.32462	5.32621	5.32791	5.32962	5.33421	5.3388	5.34259	5.34558	5.34857	5.35148	5.35439	5.35635	5.35736	5.35838	5.35701	5.35563	5.35349	5.35059	5.34768	5.34319	5.33871
2	2	5.36224	5.36315	5.36406	5.36494	5.36578	5.36662	5.36754	5.36846	5.36955	5.3708	5.37206	5.37373	5.37541	5.37715	5.37897	5.38078	5.38246	5.38414	5.38578	5.38739	5.38899	5.39059	5.39218	5.39375	5.3953	5.39685	5.39884	5.40082	5.4036	5.40718	5.41075	5.41804	5.42532	5.4326	5.43988	5.44716	5.45445	5.46175	5.4691	5.47651	5.48392	5.49142	5.49893	5.50683	5.51512	5.52341	5.53638	5.54935
2	3	5.29034	5.29106	5.29177	5.29249	5.29321	5.29393	5.29524	5.29654	5.29805	5.29974	5.30143	5.30316	5.30488	5.30645	5.30786	5.30927	5.30444	5.2996	5.29438	5.28877	5.28316	5.27742	5.27168	5.26589	5.26003	5.25418	5.2482	5.24221	5.23647	5.23098	5.22549	5.2251	5.22472	5.22516	5.22642	5.22768	5.22882	5.22997	5.23106	5.23211	5.23315	5.23588	5.2386	5.24318	5.24961	5.25603	5.26464	5.27326
2	4	5.17436	5.17693	5.1795	5.18185	5.18396	5.18607	5.18791	5.18975	5.19223	5.19533	5.19843	5.20241	5.20639	5.20896	5.21012	5.21128	5.21508	5.21889	5.22271	5.22655	5.23039	5.23612	5.24185	5.24805	5.25473	5.2614	5.26723	5.27306	5.27785	5.28158	5.28531	5.28904	5.29277	5.29656	5.30039	5.30423	5.30799	5.31176	5.3155	5.31924	5.32297	5.32674	5.33051	5.33431	5.33816	5.342	5.34585	5.34969
3	1	4.90635	4.91227	4.91818	4.92355	4.92838	4.9332	4.93691	4.94061	4.94399	4.94704	4.95009	4.95346	4.95683	4.96238	4.97012	4.97785	4.98559	4.99333	4.99998	5.00553	5.01108	5.01406	5.01704	5.01944	5.02124	5.02305	5.02626	5.02947	5.03438	5.04098	5.04759	5.05522	5.06285	5.07043	5.07796	5.08548	5.09301	5.10053	5.10801	5.11542	5.12284	5.13022	5.1376	5.14502	5.15246	5.15991	5.16598	5.17205
3	2	5.33475	5.33581	5.33687	5.33998	5.34514	5.3503	5.35793	5.36557	5.37403	5.38333	5.39263	5.40359	5.41455	5.42824	5.44466	5.46108	5.47751	5.49393	5.50894	5.52253	5.53612	5.54644	5.55677	5.56643	5.57544	5.58445	5.58995	5.59545	5.59686	5.59417	5.59148	5.58956	5.58765	5.58749	5.58908	5.59068	5.59227	5.59387	5.59546	5.59706	5.59865	5.60156	5.60447	5.60891	5.61489	5.62087	5.62766	5.63445
3	3	5.50681	5.51043	5.51405	5.51596	5.51617	5.51637	5.51742	5.51846	5.52045	5.52336	5.52628	5.52888	5.53148	5.53397	5.53635	5.53874	5.54303	5.54731	5.55257	5.55881	5.56504	5.57325	5.58147	5.5907	5.60094	5.61118	5.62142	5.63166	5.64085	5.649	5.65714	5.66598	5.67482	5.6854	5.69771	5.71003	5.72857	5.74711	5.76425	5.77999	5.79572	5.81146	5.8272	5.84364	5.86078	5.87792	5.89509	5.91225
3	4	5.04082	5.04142	5.04202	5.04262	5.04322	5.04381	5.0471	5.05038	5.05466	5.05993	5.06519	5.06833	5.07147	5.0771	5.0852	5.09331	5.10351	5.11372	5.12392	5.1341	5.14429	5.15447	5.16465	5.17593	5.18829	5.20066	5.20866	5.21666	5.22684	5.23921	5.25157	5.25896	5.26635	5.27126	5.27367	5.27608	5.28286	5.28964	5.2967	5.30402	5.31134	5.31875	5.32615	5.33359	5.34106	5.34853	5.35676	5.365
3	5	4.91247	4.91553	4.91859	4.92299	4.92873	4.93448	4.94052	4.94656	4.95178	4.95618	4.96057	4.9618	4.96303	4.96546	4.9691	4.97273	4.97624	4.97976	4.98457	4.99069	4.9968	5.00459	5.01239	5.01872	5.02361	5.02849	5.03693	5.04537	5.05422	5.06349	5.07276	5.08123	5.08971	5.09729	5.10398	5.11067	5.11521	5.11976	5.12488	5.13057	5.13625	5.14117	5.14609	5.15017	5.15341	5.15665	5.15864	5.16063
4	1	4.72136	4.71919	4.71701	4.72058	4.7299	4.73921	4.74641	4.75362	4.76208	4.77182	4.78156	4.79623	4.8109	4.82635	4.84257	4.8588	4.8778	4.8968	4.91872	4.94355	4.96838	4.99173	5.01508	5.03679	5.05686	5.07693	5.09576	5.1146	5.13343	5.15227	5.1711	5.18982	5.20854	5.22714	5.24561	5.26408	5.27748	5.29087	5.30593	5.32265	5.33938	5.35761	5.37585	5.39429	5.41292	5.43155	5.44693	5.4623
4	2	5.01034	5.01095	5.01156	5.01577	5.02357	5.03137	5.04691	5.06245	5.0736	5.08035	5.0871	5.08632	5.08554	5.08732	5.09168	5.09603	5.09192	5.0878	5.08468	5.08257	5.08045	5.08597	5.09149	5.09867	5.10752	5.11637	5.12616	5.13594	5.14751	5.16086	5.17422	5.19453	5.21484	5.2366	5.2598	5.28301	5.29049	5.29798	5.30278	5.3049	5.30702	5.31256	5.31809	5.32011	5.31861	5.31711	5.31872	5.32034
4	3	4.57008	4.5707	4.57131	4.60189	4.66242	4.72296	4.7522	4.78144	4.79846	4.80324	4.80802	4.8199	4.83178	4.84772	4.86773	4.88774	4.85767	4.82759	4.82486	4.84948	4.8741	4.90561	4.93712	4.9568	4.96467	4.97253	4.96187	4.95122	4.94073	4.93041	4.92009	4.92559	4.93108	4.94359	4.96311	4.98264	4.99479	5.00694	5.01728	5.02581	5.03434	5.03813	5.04192	5.03701	5.0234	5.00979	4.99607	4.98236
4	4	4.80541	4.82374	4.84207	4.85396	4.85939	4.86483	4.85706	4.84929	4.84114	4.83263	4.82411	4.82172	4.81934	4.82114	4.82713	4.83313	4.86055	4.88798	4.92207	4.96283	5.00358	5.02555	5.04751	5.07017	5.09353	5.11689	5.15557	5.19424	5.22959	5.26162	5.29365	5.29482	5.29598	5.29715	5.29832	5.29949	5.30066	5.30183	5.29676	5.28547	5.27418	5.26672	5.25927	5.25741	5.26116	5.2649	5.27898	5.29307
4	5	5.33675	5.34129	5.34582	5.34994	5.35363	5.35733	5.36302	5.36871	5.37373	5.37808	5.38244	5.38552	5.38861	5.39258	5.39742	5.40227	5.40654	5.41082	5.41621	5.42271	5.42921	5.43781	5.44641	5.45515	5.46402	5.4729	5.48174	5.49059	5.49995	5.50984	5.51973	5.53137	5.54301	5.55465	5.56629	5.57794	5.58958	5.60122	5.61158	5.62067	5.62976	5.63858	5.6474	5.65546	5.66274	5.67003	5.67612	5.6822
4	6	5.00551	5.00912	5.01272	5.01604	5.01908	5.02211	5.02465	5.02718	5.02951	5.03163	5.03375	5.03623	5.03871	5.04181	5.04551	5.04922	5.05365	5.05808	5.06333	5.06938	5.07543	5.08433	5.09323	5.10236	5.11172	5.12108	5.13044	5.13979	5.14913	5.15845	5.16777	5.17641	5.18505	5.19257	5.19897	5.20538	5.21416	5.22295	5.2319	5.24103	5.25015	5.25931	5.26848	5.27764	5.28681	5.29598	5.30514	5.31431
5	1	5.3454	5.34926	5.35313	5.35743	5.36218	5.36692	5.37306	5.3792	5.38495	5.39031	5.39567	5.40067	5.40568	5.41037	5.41473	5.4191	5.42315	5.4272	5.43111	5.4349	5.43868	5.44392	5.44916	5.45435	5.45949	5.46462	5.46933	5.47403	5.48092	5.48998	5.49905	5.5099	5.52076	5.53165	5.54258	5.55351	5.5644	5.57529	5.58616	5.59701	5.60786	5.617	5.62615	5.63544	5.64488	5.65431	5.66532	5.67632
5	2	5.94198	5.94544	5.9489	5.95218	5.95529	5.95839	5.96248	5.96657	5.97133	5.97677	5.9822	5.987	5.99181	5.99631	6.00052	6.00473	6.00997	6.01522	6.02075	6.02658	6.03241	6.03776	6.04311	6.04815	6.05289	6.05762	6.06355	6.06948	6.07672	6.08528	6.09383	6.10498	6.11613	6.12731	6.13853	6.14974	6.16096	6.17218	6.18402	6.1965	6.20898	6.22156	6.23415	6.246	6.25711	6.26822	6.27747	6.28671
5	3	6.36586	6.37274	6.37961	6.3856	6.3907	6.39581	6.40227	6.40873	6.41651	6.42562	6.43473	6.44384	6.45295	6.45587	6.4526	6.44933	6.44424	6.43915	6.43406	6.42897	6.42389	6.41879	6.41369	6.40846	6.40308	6.3977	6.38726	6.37682	6.36708	6.35804	6.34899	6.34362	6.33824	6.33286	6.32749	6.32211	6.31648	6.31084	6.30528	6.2998	6.29431	6.29121	6.2881	6.28726	6.28868	6.2901	6.29125	6.2924
5	4	5.84294	5.8454	5.84786	5.85007	5.85204	5.85401	5.85992	5.86583	5.87125	5.87618	5.88111	5.88542	5.88973	5.8938	5.89763	5.90146	5.90477	5.90809	5.91126	5.91427	5.91729	5.92401	5.93074	5.9374	5.94401	5.95062	5.95735	5.96407	5.96931	5.97308	5.97684	5.98334	5.98983	5.99638	6.00299	6.0096	6.01621	6.02281	6.02948	6.0362	6.04293	6.04954	6.05615	6.06281	6.06954	6.07626	6.08014	6.08402
5	5	5.98165	5.98206	5.98248	5.98284	5.98315	5.98347	5.98389	5.9843	5.98469	5.98506	5.98542	5.98584	5.98625	5.9868	5.98747	5.98815	5.98884	5.98953	5.99019	5.99082	5.99145	5.99208	5.9927	5.99333	5.99396	5.99459	5.99522	5.99585	5.99646	5.99704	5.99762	5.99813	5.99864	5.99919	5.9998	6.0004	6.00087	6.00134	6.0019	6.00253	6.00317	6.00753	6.01189	6.01625	6.02061	6.02498	6.02948	6.03398
5	6	5.99504	5.99926	6.00348	6.00858	6.01457	6.02056	6.02765	6.03475	6.04121	6.04704	6.05287	6.06014	6.06741	6.07478	6.08226	6.08973	6.09627	6.10281	6.11191	6.12358	6.13524	6.14647	6.1577	6.16807	6.17758	6.18708	6.19949	6.21189	6.22429	6.2367	6.2491	6.26107	6.27305	6.28373	6.29312	6.30251	6.31405	6.32559	6.33755	6.34992	6.36229	6.37458	6.38686	6.39791	6.40771	6.41751	6.42561	6.43371
6	1	5.48094	5.48158	5.48221	5.48453	5.48854	5.49255	5.49712	5.50169	5.5065	5.51155	5.5166	5.5231	5.52959	5.53587	5.54193	5.54799	5.55324	5.5585	5.56417	5.57026	5.57635	5.58406	5.59178	5.60011	5.60906	5.618	5.62644	5.63487	5.64347	5.65222	5.66098	5.6708	5.68062	5.6902	5.69952	5.70884	5.71786	5.72687	5.73626	5.74604	5.75582	5.76784	5.77987	5.79095	5.80111	5.81127	5.82085	5.83043
6	2	5.45395	5.44861	5.44326	5.43885	5.43536	5.43186	5.43305	5.43423	5.43651	5.4399	5.44328	5.44467	5.44606	5.44754	5.44909	5.45065	5.45783	5.465	5.47241	5.48005	5.4877	5.49537	5.50305	5.50999	5.51621	5.52242	5.52394	5.52545	5.53	5.53759	5.54517	5.5526	5.56003	5.56743	5.57482	5.58221	5.59188	5.60154	5.61316	5.62674	5.64032	5.65373	5.66715	5.68353	5.70289	5.72225	5.73754	5.75283
6	3	5.71476	5.72025	5.72575	5.73078	5.73537	5.73995	5.74382	5.74769	5.75128	5.75457	5.75786	5.76067	5.76347	5.76609	5.76852	5.77096	5.77311	5.77527	5.7785	5.7828	5.78709	5.79307	5.79904	5.8054	5.81214	5.81887	5.82557	5.83226	5.83894	5.8456	5.85225	5.86123	5.87021	5.8792	5.8882	5.89721	5.90439	5.91158	5.91765	5.92261	5.92757	5.93414	5.9407	5.94765	5.95499	5.96233	5.97125	5.98016
6	4	6.00522	6.00576	6.0063	6.00976	6.01613	6.02249	6.02703	6.03157	6.03573	6.0395	6.04328	6.05034	6.05739	6.06264	6.06608	6.06952	6.07065	6.07177	6.07279	6.07371	6.07463	6.07539	6.07616	6.07721	6.07853	6.07986	6.08359	6.08733	6.09263	6.09951	6.10639	6.10959	6.11278	6.11715	6.12268	6.12821	6.13336	6.13851	6.14133	6.14182	6.14231	6.14258	6.14285	6.14324	6.14376	6.14427	6.14499	6.1457
7	1	5.02156	5.02421	5.02686	5.03045	5.03499	5.03953	5.04555	5.05157	5.05753	5.06343	5.06933	5.07494	5.08055	5.08735	5.09532	5.1033	5.11194	5.12058	5.12773	5.13338	5.13904	5.14634	5.15364	5.16172	5.17059	5.17945	5.18885	5.19825	5.20748	5.21654	5.22559	5.23133	5.23707	5.24251	5.24767	5.25282	5.25785	5.26288	5.26793	5.27301	5.27809	5.28324	5.28839	5.29352	5.29863	5.30374	5.3086	5.31346
7	2	5.15469	5.15971	5.16474	5.16924	5.1732	5.17717	5.18138	5.1856	5.19077	5.1969	5.20303	5.20978	5.21652	5.22083	5.2227	5.22457	5.22602	5.22748	5.22956	5.23229	5.23501	5.24134	5.24766	5.25338	5.25847	5.26357	5.26619	5.26881	5.27247	5.27716	5.28186	5.28854	5.29522	5.29932	5.30083	5.30234	5.29938	5.29643	5.29315	5.28954	5.28594	5.28442	5.2829	5.28262	5.28359	5.28456	5.28552	5.28649
7	3	5.59278	5.59512	5.59746	5.59813	5.59713	5.59612	5.59528	5.59444	5.59417	5.59447	5.59477	5.59518	5.5956	5.59509	5.59364	5.5922	5.59379	5.59538	5.59698	5.59857	5.60016	5.60327	5.60638	5.60991	5.61387	5.61782	5.62114	5.62445	5.62685	5.62834	5.62982	5.63141	5.63301	5.63758	5.64514	5.6527	5.65978	5.66687	5.67419	5.68176	5.68933	5.69899	5.70864	5.71934	5.73108	5.74282	5.75201	5.76121
7	4	5.49356	5.51051	5.52745	5.54459	5.56191	5.57923	5.58994	5.60065	5.60819	5.61256	5.61692	5.61839	5.61987	5.62144	5.62312	5.62481	5.6264	5.62799	5.62938	5.63057	5.63177	5.63289	5.63401	5.63525	5.6366	5.63794	5.63956	5.64118	5.64282	5.64448	5.64614	5.64755	5.64895	5.65262	5.65854	5.66446	5.67651	5.68856	5.69828	5.70568	5.71309	5.71948	5.72588	5.73853	5.75742	5.77632	5.80691	5.83751
7	5	5.51729	5.52124	5.5252	5.52879	5.53203	5.53527	5.53805	5.54082	5.5434	5.54579	5.54818	5.55097	5.55377	5.55762	5.56254	5.56746	5.57175	5.57604	5.58132	5.58758	5.59384	5.60049	5.60715	5.61379	5.62043	5.62707	5.63366	5.64025	5.64683	5.65342	5.66001	5.66659	5.67318	5.6811	5.69035	5.69959	5.70702	5.71445	5.72069	5.72573	5.73078	5.73541	5.74003	5.74565	5.75225	5.75885	5.76554	5.77223
8	1	5.00351	5.00958	5.01564	5.02559	5.03942	5.05325	5.06617	5.07909	5.08973	5.09811	5.10648	5.11173	5.11698	5.12355	5.13146	5.13936	5.15041	5.16145	5.17299	5.18503	5.19707	5.20903	5.22098	5.2329	5.24478	5.25665	5.2722	5.28774	5.30438	5.32211	5.33985	5.35729	5.37474	5.39105	5.40621	5.42137	5.43274	5.44411	5.45548	5.46685	5.47822	5.49184	5.50546	5.51881	5.53187	5.54494	5.55674	5.56853
8	2	4.97307	4.97381	4.97455	4.97528	4.976	4.97671	4.97747	4.97822	4.97899	4.97978	4.98058	4.98136	4.98214	4.98498	4.98986	4.99475	4.9994	5.00405	5.00916	5.01473	5.02029	5.02737	5.03446	5.04233	5.05098	5.05964	5.0676	5.07556	5.08418	5.09346	5.10273	5.11244	5.12215	5.13191	5.14174	5.15157	5.16179	5.17201	5.1847	5.19985	5.215	5.22811	5.24121	5.25398	5.2664	5.27882	5.29122	5.30362
8	3	5.5302	5.53156	5.53292	5.53415	5.53526	5.53636	5.53734	5.53833	5.54008	5.54261	5.54514	5.55245	5.55976	5.56531	5.56908	5.57285	5.57784	5.58284	5.58831	5.59427	5.60023	5.60738	5.61453	5.62264	5.63172	5.6408	5.64571	5.65061	5.65507	5.65906	5.66306	5.66675	5.67045	5.6744	5.6786	5.68281	5.68855	5.69429	5.69941	5.70391	5.70841	5.71228	5.71615	5.71945	5.72218	5.7249	5.726	5.72709
8	4	5.38672	5.38997	5.39322	5.39625	5.39906	5.40188	5.4061	5.41032	5.41562	5.42199	5.42836	5.43651	5.44467	5.45068	5.45454	5.45841	5.46401	5.46961	5.47632	5.48416	5.49199	5.50219	5.51238	5.52363	5.53593	5.54822	5.55772	5.56722	5.57671	5.58621	5.5957	5.6038	5.6119	5.61998	5.62805	5.63612	5.64832	5.66051	5.66996	5.67666	5.68335	5.69215	5.70094	5.71009	5.71959	5.72908	5.73723	5.74537
8	5	6.03891	6.04545	6.052	6.05677	6.05976	6.06275	6.05888	6.05502	6.0496	6.04264	6.03567	6.03644	6.03722	6.03844	6.04013	6.04181	6.03603	6.03025	6.02036	6.00636	5.99235	5.97216	5.95196	5.93108	5.90952	5.88796	5.87514	5.86231	5.85034	5.8392	5.82807	5.82174	5.81541	5.81161	5.81033	5.80906	5.8102	5.81134	5.80845	5.80152	5.79459	5.78493	5.77527	5.76895	5.76596	5.76298	5.76788	5.77278
9	1	5.91647	5.91976	5.92305	5.9277	5.93372	5.93973	5.94577	5.95182	5.95688	5.96094	5.965	5.96771	5.97042	5.9733	5.97636	5.97941	5.98359	5.98778	5.99251	5.99779	6.00306	6.01287	6.02267	6.03122	6.0385	6.04578	6.05291	6.06004	6.06715	6.07424	6.08133	6.08837	6.09541	6.10244	6.10947	6.1165	6.1232	6.1299	6.13598	6.14143	6.14688	6.15086	6.15484	6.15857	6.16205	6.16554	6.16745	6.16936
9	2	5.7657	5.77529	5.78488	5.7932	5.80024	5.80728	5.81264	5.818	5.82437	5.83175	5.83913	5.84924	5.85934	5.86927	5.879	5.88874	5.89427	5.89979	5.90336	5.90499	5.90661	5.90824	5.90986	5.91394	5.92047	5.92701	5.93437	5.94173	5.94806	5.95335	5.95864	5.96263	5.96663	5.97174	5.97796	5.98418	5.9961	6.00802	6.02233	6.03905	6.05576	6.06288	6.07	6.07712	6.08424	6.09136	6.09475	6.09814
9	3	6.07035	6.07127	6.07219	6.07309	6.07399	6.07489	6.07851	6.08213	6.08561	6.08895	6.09229	6.09506	6.09784	6.10105	6.10471	6.10836	6.11247	6.11657	6.11946	6.12112	6.12279	6.12446	6.12613	6.12779	6.12946	6.13113	6.13264	6.13415	6.13683	6.14068	6.14453	6.14849	6.15246	6.15556	6.15782	6.16008	6.16153	6.16299	6.16445	6.16591	6.16737	6.16883	6.17029	6.17218	6.17451	6.17684	6.18183	6.18682
9	4	5.84728	5.85036	5.85345	5.85633	5.859	5.86168	5.86404	5.86641	5.86861	5.87064	5.87267	5.87598	5.87929	5.88336	5.88821	5.89305	5.89735	5.90165	5.90577	5.90972	5.91366	5.921	5.92833	5.9369	5.94671	5.95653	5.96437	5.97222	5.9797	5.98682	5.99393	6.001	6.00806	6.0151	6.02212	6.02913	6.03606	6.04299	6.05005	6.05722	6.0644	6.07406	6.08372	6.09337	6.10303	6.11268	6.12	6.12732
10	1	5.17674	5.17744	5.17813	5.17563	5.16992	5.16421	5.15704	5.14986	5.14274	5.13566	5.12858	5.12172	5.11487	5.10845	5.10247	5.09649	5.09413	5.09177	5.09164	5.09372	5.09581	5.09782	5.09982	5.10175	5.10361	5.10547	5.10741	5.10935	5.11129	5.11323	5.11518	5.11872	5.12227	5.12925	5.13964	5.15004	5.16065	5.17127	5.18176	5.19214	5.20252	5.21281	5.22309	5.23192	5.23928	5.24664	5.25174	5.25683
10	2	5.35695	5.36193	5.36692	5.37311	5.38049	5.38788	5.39717	5.40647	5.41588	5.42542	5.43496	5.44356	5.45217	5.46021	5.46767	5.47513	5.48175	5.48837	5.49605	5.5048	5.51355	5.52673	5.53992	5.55381	5.56841	5.583	5.59541	5.60781	5.61963	5.63086	5.64209	5.65438	5.66668	5.67788	5.68798	5.69807	5.70801	5.71794	5.72787	5.73779	5.7477	5.75626	5.76481	5.77237	5.77893	5.78549	5.79039	5.79529
10	3	5.22327	5.24951	5.27574	5.29677	5.31259	5.32841	5.34067	5.35294	5.36708	5.3831	5.39912	5.41374	5.42837	5.43678	5.43898	5.44118	5.43568	5.43019	5.43201	5.44114	5.45027	5.44826	5.44626	5.44226	5.43627	5.43028	5.43122	5.43217	5.43462	5.43859	5.44257	5.44206	5.44154	5.44485	5.45198	5.4591	5.47091	5.48271	5.4916	5.49758	5.50355	5.51104	5.51852	5.52566	5.53244	5.53923	5.54336	5.5475
10	4	5.29415	5.29173	5.2893	5.28717	5.28534	5.28351	5.28477	5.28603	5.28704	5.28781	5.28857	5.28761	5.28664	5.28607	5.28591	5.28575	5.28822	5.29069	5.29305	5.29528	5.29752	5.30184	5.30616	5.30971	5.3125	5.31528	5.31869	5.3221	5.32561	5.32923	5.33285	5.33472	5.33658	5.33857	5.34069	5.34281	5.35015	5.3575	5.36603	5.37575	5.38547	5.39743	5.4094	5.42099	5.43221	5.44342	5.45346	5.46349
11	1	5.03227	5.03751	5.04275	5.04761	5.05208	5.05654	5.06234	5.06814	5.07438	5.08107	5.08775	5.09371	5.09966	5.10523	5.11041	5.11559	5.12236	5.12913	5.13682	5.14541	5.154	5.16353	5.17307	5.18324	5.19405	5.20486	5.21896	5.23307	5.24662	5.2596	5.27258	5.28504	5.2975	5.30988	5.32216	5.33445	5.3467	5.35894	5.37118	5.38341	5.39564	5.40787	5.4201	5.43232	5.44455	5.45678	5.46901	5.48124
11	2	5.39999	5.40805	5.41612	5.42192	5.42547	5.42901	5.43119	5.43337	5.43604	5.4392	5.44237	5.44751	5.45265	5.45745	5.46192	5.4664	5.47035	5.47429	5.47938	5.48561	5.49185	5.5005	5.50915	5.51855	5.52872	5.53888	5.5489	5.55891	5.56747	5.57458	5.58169	5.59342	5.60515	5.6166	5.62777	5.63894	5.64892	5.6589	5.66867	5.67823	5.68779	5.6949	5.702	5.71177	5.7242	5.73663	5.74941	5.76219
11	3	5.34952	5.35228	5.35503	5.35752	5.35975	5.36197	5.3666	5.37123	5.37687	5.38353	5.39019	5.39693	5.40366	5.41039	5.41712	5.42385	5.43057	5.4373	5.44403	5.45075	5.45748	5.46413	5.47079	5.47739	5.48396	5.49052	5.49695	5.50339	5.50786	5.51037	5.51287	5.51758	5.52228	5.52653	5.53032	5.53411	5.53763	5.54116	5.54571	5.55128	5.55686	5.56671	5.57657	5.58721	5.59863	5.61005	5.62168	5.63331
11	4	5.36254	5.36604	5.36954	5.37525	5.38316	5.39108	5.40331	5.41555	5.4281	5.44097	5.45385	5.46315	5.47245	5.48119	5.48939	5.49758	5.50573	5.51387	5.52034	5.52512	5.5299	5.53204	5.53418	5.53567	5.53652	5.53737	5.53816	5.53894	5.5398	5.54072	5.54164	5.54255	5.54347	5.54435	5.54518	5.54602	5.54684	5.54765	5.54851	5.5494	5.55029	5.55125	5.5522	5.55308	5.55387	5.55466	5.55549	5.55631
11	5	5.33857	5.33861	5.33865	5.34029	5.34351	5.34674	5.35054	5.35434	5.35792	5.3613	5.36467	5.36766	5.37065	5.37347	5.37611	5.37876	5.37884	5.37893	5.38008	5.3823	5.38452	5.38818	5.39184	5.39567	5.39969	5.4037	5.40765	5.4116	5.41554	5.41947	5.4234	5.42902	5.43464	5.44127	5.44889	5.45652	5.46416	5.47179	5.4786	5.48457	5.49054	5.49822	5.50589	5.51357	5.52124	5.52892	5.53592	5.54293
12	1	4.82117	4.83502	4.84887	4.86116	4.87188	4.8826	4.895	4.9074	4.92193	4.93859	4.95525	4.97565	4.99604	5.01638	5.03665	5.05693	5.07201	5.08709	5.10023	5.11144	5.12264	5.13175	5.14086	5.1495	5.15768	5.16585	5.17219	5.17853	5.18284	5.18513	5.18742	5.18971	5.19199	5.19428	5.19657	5.19886	5.2011	5.20335	5.20554	5.20768	5.20982	5.20987	5.20993	5.20798	5.20404	5.20009	5.19614	5.1922
12	2	4.79996	4.80519	4.81043	4.81647	4.82331	4.83014	4.83858	4.84702	4.85651	4.86707	4.87762	4.89081	4.904	4.9185	4.93431	4.95012	4.96562	4.98113	4.99311	5.00157	5.01004	5.02	5.02996	5.04048	5.05157	5.06266	5.07245	5.08224	5.09089	5.09842	5.10594	5.11758	5.12922	5.14115	5.15337	5.16559	5.17779	5.18999	5.20079	5.21018	5.21958	5.22545	5.23131	5.23599	5.23946	5.24294	5.24416	5.24538
12	3	5.00778	5.01045	5.01313	5.01728	5.02291	5.02854	5.03417	5.0398	5.04504	5.0499	5.05476	5.05898	5.06319	5.06719	5.07097	5.07475	5.0809	5.08705	5.09482	5.10422	5.11362	5.12349	5.13335	5.14318	5.15295	5.16273	5.1716	5.18048	5.18845	5.19552	5.20259	5.21242	5.22225	5.23203	5.24175	5.25148	5.26112	5.27076	5.28038	5.28998	5.29959	5.30923	5.31887	5.32855	5.33827	5.34799	5.35771	5.36742
12	4	5.41674	5.41741	5.41809	5.41902	5.4202	5.42138	5.42271	5.42404	5.42528	5.4264	5.42753	5.42833	5.42912	5.42987	5.43057	5.43126	5.43235	5.43345	5.43449	5.4355	5.4365	5.43728	5.43806	5.43885	5.43965	5.44045	5.443	5.44556	5.4507	5.45843	5.46616	5.48459	5.50301	5.5202	5.53615	5.55211	5.5561	5.56009	5.55745	5.54818	5.53891	5.52206	5.50522	5.49094	5.47922	5.46751	5.48388	5.50025
12	5	5.69838	5.69821	5.69804	5.69961	5.70291	5.70622	5.71012	5.71402	5.71772	5.72124	5.72475	5.7278	5.73086	5.73371	5.73635	5.73899	5.7413	5.7436	5.74697	5.75142	5.75586	5.76125	5.76663	5.77205	5.77749	5.78293	5.78861	5.79429	5.80059	5.80752	5.81444	5.82135	5.82825	5.83491	5.84132	5.84774	5.85247	5.8572	5.86229	5.86775	5.8732	5.8799	5.88661	5.89331	5.9	5.90669	5.91329	5.91989
13	1	5.03776	5.04469	5.05162	5.05794	5.06367	5.06939	5.07713	5.08487	5.09259	5.10031	5.10802	5.11465	5.12129	5.12751	5.13332	5.13914	5.14485	5.15057	5.15729	5.16501	5.17274	5.18506	5.19738	5.20974	5.22214	5.23454	5.24717	5.2598	5.27159	5.28255	5.29352	5.30492	5.31633	5.32844	5.34124	5.35404	5.36614	5.37823	5.38922	5.3991	5.40899	5.41887	5.42875	5.44	5.45261	5.46523	5.47563	5.48604
13	2	5.44963	5.44448	5.43933	5.4367	5.43659	5.43648	5.43778	5.43909	5.44266	5.4485	5.45434	5.46532	5.47629	5.48791	5.50018	5.51245	5.52058	5.52871	5.53379	5.53583	5.53786	5.54221	5.54656	5.56057	5.58422	5.60788	5.61536	5.62284	5.62746	5.62923	5.63099	5.6239	5.6168	5.6067	5.59358	5.58046	5.5766	5.57273	5.57724	5.59011	5.60299	5.62386	5.64474	5.66184	5.67519	5.68853	5.70152	5.71451
13	3	5.12691	5.12887	5.13084	5.13268	5.1344	5.13612	5.13757	5.13902	5.14126	5.14431	5.14735	5.15148	5.15561	5.15961	5.16349	5.16737	5.17131	5.17525	5.18017	5.18606	5.19196	5.19873	5.2055	5.21226	5.21901	5.22575	5.23249	5.23923	5.24597	5.25272	5.25946	5.2676	5.27574	5.28491	5.29509	5.30528	5.31621	5.32714	5.33739	5.34698	5.35657	5.36615	5.37574	5.38534	5.39495	5.40456	5.41366	5.42275
13	4	5.30808	5.32186	5.33564	5.34967	5.36396	5.37825	5.39264	5.40703	5.42143	5.43583	5.45023	5.46463	5.47902	5.49342	5.50782	5.52222	5.53331	5.5444	5.54807	5.54432	5.54058	5.53799	5.5354	5.53115	5.52525	5.51935	5.52044	5.52153	5.52287	5.52445	5.52603	5.52364	5.52124	5.51956	5.51861	5.51766	5.524	5.53035	5.53506	5.53814	5.54121	5.52972	5.51822	5.50846	5.50043	5.49241	5.49944	5.50648
13	5	5.24712	5.24901	5.2509	5.2541	5.25861	5.26311	5.26804	5.27296	5.27764	5.28209	5.28653	5.29034	5.29414	5.29768	5.30095	5.30423	5.30706	5.30989	5.31261	5.3152	5.31779	5.32329	5.32879	5.33534	5.34295	5.35055	5.35802	5.36549	5.37247	5.37895	5.38544	5.39141	5.39738	5.40334	5.40928	5.41522	5.4211	5.42699	5.43287	5.43875	5.44463	5.45045	5.45627	5.46138	5.46577	5.47017	5.47345	5.47673
14	1	4.5489	4.557	4.5651	4.57269	4.57977	4.58686	4.59341	4.59996	4.60659	4.61329	4.61999	4.62773	4.63547	4.64251	4.64885	4.6552	4.66357	4.67195	4.68137	4.69184	4.7023	4.71353	4.72476	4.735	4.74425	4.75351	4.76076	4.76801	4.77497	4.78165	4.78833	4.79481	4.8013	4.80779	4.81427	4.82076	4.82725	4.83373	4.83853	4.84164	4.84475	4.84607	4.84739	4.84841	4.84914	4.84986	4.85	4.85014
14	2	5.23303	5.23397	5.23491	5.23589	5.23692	5.23796	5.23895	5.23994	5.24101	5.24216	5.2433	5.24511	5.24692	5.24876	5.25064	5.25252	5.25426	5.256	5.25897	5.26315	5.26734	5.2742	5.28106	5.2882	5.29561	5.30303	5.31057	5.31811	5.32561	5.33307	5.34052	5.34785	5.35517	5.36244	5.36965	5.37686	5.38402	5.39119	5.39631	5.39939	5.40246	5.40427	5.40608	5.40862	5.41187	5.41513	5.42079	5.42646
14	3	5.09705	5.10676	5.11647	5.12494	5.13218	5.13942	5.14498	5.15055	5.15607	5.16155	5.16703	5.17477	5.18252	5.19049	5.19868	5.20687	5.21508	5.22328	5.22903	5.23233	5.23562	5.23473	5.23383	5.23401	5.23529	5.23656	5.23886	5.24115	5.24339	5.24557	5.24774	5.24985	5.25197	5.25407	5.25615	5.25824	5.26033	5.26242	5.26853	5.27866	5.2888	5.2957	5.3026	5.30892	5.31467	5.32042	5.32665	5.33289
14	4	4.86827	4.88722	4.90617	4.91974	4.92794	4.93613	4.9431	4.95007	4.95822	4.96756	4.9769	4.98623	4.99557	5.00139	5.00371	5.00602	5.00287	4.99972	4.99749	4.99616	4.99483	4.99714	4.99946	5.00177	5.00408	5.00639	5.00845	5.01051	5.01529	5.02281	5.03032	5.03602	5.04172	5.04556	5.04755	5.04954	5.05134	5.05314	5.05494	5.05674	5.05854	5.0658	5.07306	5.08116	5.09011	5.09907	5.10789	5.11671
15	1	4.24831	4.24901	4.24971	4.25067	4.25189	4.2531	4.2545	4.2559	4.25866	4.2628	4.26694	4.27926	4.29159	4.30437	4.31761	4.33085	4.34409	4.35732	4.36806	4.37629	4.38452	4.3872	4.38987	4.39172	4.39274	4.39376	4.3947	4.39564	4.39657	4.39751	4.39845	4.39956	4.40067	4.40078	4.39989	4.39899	4.39157	4.38414	4.37498	4.36409	4.3532	4.3423	4.33141	4.32248	4.31553	4.30858	4.30667	4.30477
15	2	5.2334	5.2399	5.2464	5.2519	5.25639	5.26088	5.26731	5.27373	5.28077	5.2884	5.29604	5.29951	5.30297	5.30537	5.3067	5.30803	5.31312	5.31821	5.32478	5.33282	5.34087	5.35062	5.36037	5.37013	5.37988	5.38963	5.39938	5.40913	5.41803	5.42608	5.43413	5.4385	5.44287	5.44566	5.44686	5.44807	5.44907	5.45007	5.45119	5.45242	5.45366	5.46128	5.46891	5.47553	5.48114	5.48675	5.49	5.49325
15	3	5.37644	5.38045	5.38446	5.38799	5.39104	5.39408	5.39939	5.4047	5.41061	5.41712	5.42363	5.42599	5.42835	5.43047	5.43234	5.43422	5.43996	5.4457	5.45098	5.45579	5.46059	5.46294	5.46529	5.46729	5.46893	5.47057	5.46732	5.46407	5.46206	5.46128	5.46049	5.46342	5.46634	5.47089	5.47708	5.48326	5.49058	5.4979	5.50522	5.51255	5.51987	5.52719	5.53451	5.54183	5.54915	5.55648	5.56474	5.57301
15	4	5.24733	5.24803	5.24874	5.25402	5.26388	5.27375	5.28682	5.2999	5.31164	5.32204	5.33243	5.33432	5.3362	5.33761	5.33855	5.33949	5.34042	5.34136	5.3449	5.35104	5.35718	5.36405	5.37092	5.37107	5.36451	5.35794	5.35645	5.35496	5.35084	5.34407	5.3373	5.33633	5.33536	5.33784	5.34376	5.34968	5.35361	5.35755	5.36401	5.373	5.38198	5.38765	5.39333	5.3975	5.40017	5.40283	5.40357	5.40431
15	5	5.58014	5.58757	5.595	5.60165	5.60753	5.6134	5.61819	5.62298	5.62782	5.63271	5.63761	5.64455	5.65149	5.66262	5.67794	5.69325	5.70421	5.71516	5.72595	5.73656	5.74717	5.75822	5.76928	5.77933	5.7884	5.79746	5.80908	5.82069	5.83144	5.84132	5.8512	5.8615	5.87179	5.88235	5.89315	5.90396	5.91331	5.92267	5.93014	5.93572	5.94129	5.94403	5.94676	5.94929	5.95163	5.95397	5.95663	5.95928
15	6	5.21397	5.22547	5.23697	5.24731	5.2565	5.26569	5.27315	5.2806	5.28841	5.29656	5.30472	5.31786	5.331	5.34108	5.3481	5.35512	5.36866	5.3822	5.39679	5.41243	5.42808	5.44365	5.45922	5.47479	5.49036	5.50593	5.52529	5.54464	5.56258	5.5791	5.59562	5.61119	5.62676	5.64186	5.65648	5.67111	5.68289	5.69468	5.70829	5.72371	5.73914	5.74638	5.75361	5.76036	5.76661	5.77286	5.77905	5.78523
16	1	5.67765	5.67653	5.67541	5.67458	5.67404	5.6735	5.67507	5.67664	5.6794	5.68333	5.68727	5.69076	5.69426	5.69759	5.70075	5.70392	5.70686	5.70981	5.71363	5.71832	5.723	5.73179	5.74057	5.74791	5.75381	5.75971	5.76553	5.77134	5.77714	5.78292	5.78871	5.79447	5.80023	5.80594	5.81161	5.81728	5.83091	5.84453	5.85862	5.87316	5.8877	5.9022	5.9167	5.93116	5.94558	5.96	5.97442	5.98885
16	2	5.65945	5.65176	5.64406	5.63767	5.63259	5.62751	5.62312	5.61872	5.6141	5.60927	5.60443	5.59959	5.59475	5.58372	5.56651	5.54929	5.54265	5.536	5.53363	5.53552	5.53741	5.53892	5.54044	5.53849	5.53309	5.52768	5.52735	5.52701	5.52755	5.52896	5.53038	5.53052	5.53065	5.52788	5.52219	5.51651	5.51082	5.50514	5.49945	5.49376	5.48808	5.48476	5.48144	5.48048	5.4819	5.48331	5.48472	5.48613
17	1	5.34883	5.34425	5.33966	5.33652	5.33483	5.33315	5.33327	5.33339	5.33393	5.33487	5.33582	5.33721	5.3386	5.34133	5.3454	5.34947	5.35315	5.35682	5.36019	5.36326	5.36633	5.36875	5.37116	5.37368	5.37628	5.37889	5.38349	5.38809	5.39266	5.39719	5.40172	5.40626	5.41081	5.41536	5.41994	5.42451	5.42907	5.43363	5.43832	5.44312	5.44792	5.45445	5.46099	5.46721	5.47311	5.47902	5.48352	5.48802
17	2	5.03755	5.03869	5.03983	5.04108	5.04244	5.04379	5.04806	5.05233	5.05883	5.06756	5.07629	5.0889	5.10151	5.11261	5.12218	5.13176	5.13631	5.14086	5.14597	5.15165	5.15732	5.16627	5.17522	5.18545	5.19696	5.20846	5.21882	5.22918	5.23836	5.24635	5.25434	5.26225	5.27016	5.27803	5.28586	5.29369	5.30147	5.30926	5.31704	5.32482	5.33261	5.34039	5.34817	5.35596	5.36374	5.37153	5.37931	5.38709
17	3	5.16931	5.17035	5.17139	5.17236	5.17328	5.17419	5.17513	5.17607	5.17719	5.17849	5.17979	5.1817	5.18361	5.18552	5.18743	5.18934	5.19121	5.19308	5.1949	5.19667	5.19844	5.20014	5.20183	5.2035	5.20513	5.20676	5.20829	5.20982	5.21126	5.2126	5.21394	5.21753	5.22111	5.22586	5.23176	5.23766	5.24566	5.25365	5.26263	5.2726	5.28257	5.29565	5.30872	5.3218	5.33488	5.34796	5.36107	5.37418
17	4	5.13619	5.14044	5.14468	5.14865	5.15232	5.156	5.15925	5.16251	5.1656	5.16852	5.17145	5.1741	5.17675	5.17924	5.18157	5.18391	5.18603	5.18815	5.19018	5.19211	5.19405	5.19584	5.19762	5.19935	5.20102	5.20269	5.20428	5.20588	5.20777	5.20995	5.21213	5.21475	5.21738	5.21981	5.22206	5.22431	5.22554	5.22678	5.22734	5.22723	5.22713	5.22599	5.22485	5.22371	5.22259	5.22147	5.22006	5.21865
17	5	4.63479	4.63871	4.64262	4.64787	4.65446	4.66105	4.66763	4.67422	4.68035	4.68602	4.69169	4.69663	4.70157	4.70619	4.71049	4.71479	4.71858	4.72238	4.72822	4.73611	4.744	4.75378	4.76355	4.77329	4.78301	4.79273	4.80245	4.81217	4.82189	4.83161	4.84133	4.85328	4.86522	4.87663	4.8875	4.89837	4.90809	4.91781	4.92752	4.93724	4.94696	4.95668	4.9664	4.97479	4.98185	4.98891	4.99576	5.0026
17	6	4.85405	4.8595	4.86496	4.86997	4.87453	4.87909	4.88289	4.88669	4.8902	4.89341	4.89662	4.89973	4.90283	4.90685	4.91178	4.91671	4.92154	4.92636	4.93158	4.93721	4.94284	4.94911	4.95538	4.9618	4.96839	4.97497	4.98157	4.98817	4.99479	5.00143	5.00808	5.01472	5.02136	5.02837	5.03574	5.04311	5.05077	5.05842	5.06562	5.07236	5.0791	5.08278	5.08646	5.09016	5.09387	5.09759	5.10135	5.10512
18	1	5.04174	5.06856	5.09538	5.11674	5.13264	5.14855	5.18041	5.21228	5.24101	5.26659	5.29217	5.30342	5.31467	5.32595	5.33727	5.34859	5.3602	5.37182	5.38343	5.39505	5.40666	5.40986	5.41305	5.41557	5.4174	5.41923	5.42087	5.4225	5.42587	5.43098	5.43608	5.44733	5.45858	5.46983	5.48108	5.49233	5.50358	5.51482	5.52175	5.52435	5.52696	5.51431	5.50167	5.48903	5.47639	5.46375	5.45543	5.44711
18	2	5.70322	5.70683	5.71044	5.71217	5.71202	5.71187	5.71097	5.71006	5.70923	5.70849	5.70774	5.70725	5.70676	5.70638	5.70611	5.70585	5.70579	5.70574	5.70666	5.70854	5.71043	5.71498	5.71953	5.72413	5.72879	5.73344	5.73648	5.73952	5.74142	5.74217	5.74292	5.74256	5.7422	5.74297	5.74489	5.74681	5.7487	5.7506	5.75346	5.75728	5.7611	5.76701	5.77292	5.77946	5.78662	5.79378	5.80135	5.80893
18	3	5.54446	5.54556	5.54667	5.54771	5.54869	5.54966	5.55055	5.55144	5.55251	5.55377	5.55503	5.55674	5.55846	5.56024	5.56209	5.56393	5.5657	5.56747	5.5692	5.57089	5.57257	5.57414	5.57571	5.57727	5.57882	5.58037	5.58191	5.58345	5.58495	5.58641	5.58787	5.58919	5.59052	5.59185	5.59318	5.59451	5.59584	5.59717	5.60058	5.60608	5.61158	5.61581	5.62004	5.62526	5.63148	5.63769	5.64816	5.65863
18	4	5.5725	5.57316	5.57383	5.57449	5.57516	5.57582	5.57684	5.57786	5.579	5.58026	5.58153	5.58292	5.58432	5.58579	5.58734	5.58889	5.59055	5.59222	5.59388	5.59554	5.5972	5.59886	5.60052	5.60272	5.60545	5.60818	5.61475	5.62133	5.62786	5.63433	5.6408	5.64206	5.64332	5.64463	5.646	5.64736	5.6561	5.66483	5.66803	5.66571	5.66338	5.66517	5.66697	5.6701	5.67456	5.67902	5.68074	5.68246
19	1	4.79595	4.80273	4.80952	4.81728	4.82604	4.83479	4.84346	4.85213	4.86016	4.86754	4.87493	4.88127	4.88762	4.89347	4.89881	4.90415	4.91065	4.91715	4.92499	4.93417	4.94335	4.95652	4.96968	4.98279	4.99583	5.00888	5.01982	5.03076	5.04196	5.05342	5.06489	5.07783	5.09078	5.10378	5.11683	5.12987	5.14281	5.15575	5.16864	5.18149	5.19435	5.2062	5.21806	5.22898	5.23895	5.24893	5.25902	5.26911
19	2	5.31801	5.31893	5.31985	5.32124	5.32311	5.32497	5.32287	5.32077	5.3165	5.31005	5.30361	5.30409	5.30458	5.3057	5.30746	5.30922	5.31111	5.31299	5.31486	5.3167	5.31855	5.32021	5.32188	5.32015	5.31501	5.30988	5.31087	5.31186	5.31477	5.3196	5.32443	5.33033	5.33623	5.33998	5.34158	5.34317	5.34482	5.34648	5.34805	5.34954	5.35103	5.35348	5.35593	5.35964	5.36462	5.3696	5.38185	5.39411
19	3	5.93061	5.94929	5.96796	5.98844	6.01074	6.03303	6.05693	6.08082	6.10445	6.12781	6.15117	6.17032	6.18946	6.21601	6.24995	6.28389	6.31761	6.35132	6.38281	6.41206	6.44132	6.46389	6.48645	6.50109	6.50781	6.51452	6.51341	6.51229	6.5096	6.50534	6.50108	6.49544	6.4898	6.4822	6.47263	6.46306	6.44034	6.41762	6.3931	6.3668	6.3405	6.31204	6.28358	6.25423	6.22398	6.19373	6.16184	6.12995
19	4	5.65753	5.66091	5.6643	5.66756	5.6707	5.67385	5.67641	5.67898	5.68107	5.6827	5.68432	5.6842	5.68407	5.684	5.68398	5.68396	5.68398	5.68401	5.68389	5.68362	5.68336	5.68229	5.68123	5.67879	5.67497	5.67115	5.66776	5.66438	5.66149	5.65911	5.65672	5.65549	5.65425	5.65336	5.6528	5.65224	5.6504	5.64856	5.6456	5.64153	5.63746	5.6323	5.62713	5.62218	5.61744	5.6127	5.60837	5.60405
20	1	3.95133	3.95133	3.95133	3.9513	3.95122	3.95114	3.95172	3.9523	3.95344	3.95513	3.95683	3.95981	3.9628	3.96551	3.96795	3.97038	3.97241	3.97444	3.97671	3.97922	3.98173	3.98585	3.98997	3.99454	3.99954	4.00454	4.00988	4.01522	4.02112	4.02757	4.03402	4.04212	4.05022	4.05944	4.06978	4.08013	4.0907	4.10127	4.11188	4.12252	4.13316	4.14386	4.15457	4.1653	4.17607	4.18684	4.19777	4.2087
20	2	4.21562	4.22393	4.23224	4.23974	4.24641	4.25309	4.25945	4.26582	4.27218	4.27852	4.28487	4.28875	4.29262	4.2935	4.29137	4.28924	4.28934	4.28943	4.2898	4.29044	4.29108	4.28805	4.28502	4.28173	4.27816	4.2746	4.2772	4.2798	4.28597	4.2957	4.30544	4.32173	4.33802	4.35595	4.37553	4.3951	4.40436	4.41363	4.42376	4.43476	4.44576	4.4601	4.47444	4.49024	4.5075	4.52476	4.53997	4.55519
20	3	4.53094	4.53338	4.53582	4.54002	4.54598	4.55194	4.55863	4.56531	4.57149	4.57716	4.58283	4.58764	4.59244	4.60153	4.61489	4.62825	4.64054	4.65283	4.66371	4.67317	4.68263	4.68946	4.6963	4.70512	4.71594	4.72675	4.73452	4.7423	4.75047	4.75902	4.76757	4.77821	4.78886	4.79945	4.80999	4.82052	4.83118	4.84184	4.85125	4.85941	4.86757	4.87412	4.88066	4.88716	4.89361	4.90006	4.90651	4.91297
20	4	4.65188	4.66486	4.67784	4.68914	4.69875	4.70836	4.71563	4.7229	4.72922	4.73461	4.73999	4.74229	4.74459	4.75729	4.7804	4.80351	4.82619	4.84888	4.87034	4.8906	4.91085	4.93095	4.95105	4.96816	4.98229	4.99642	5.01495	5.03348	5.05135	5.06857	5.08579	5.09971	5.11363	5.12756	5.14148	5.1554	5.15851	5.16163	5.16224	5.16035	5.15847	5.15823	5.158	5.16179	5.16958	5.17738	5.18518	5.19297
20	5	4.91872	4.90248	4.88624	4.86829	4.84864	4.82899	4.82113	4.81327	4.81346	4.82171	4.82995	4.83336	4.83677	4.83938	4.8412	4.84302	4.83477	4.82652	4.81862	4.81105	4.80348	4.8132	4.82292	4.8398	4.86384	4.88787	4.91191	4.93594	4.95727	4.97589	4.99451	5.00482	5.01513	5.02088	5.02207	5.02326	5.02445	5.02564	5.02804	5.03166	5.03527	5.04283	5.0504	5.06045	5.07301	5.08556	5.10071	5.11585
21	1	4.43003	4.43003	4.43003	4.43003	4.43003	4.43003	4.42999	4.42995	4.42985	4.42968	4.42952	4.42993	4.43034	4.43187	4.43452	4.43716	4.43893	4.44069	4.44137	4.44097	4.44056	4.4422	4.44384	4.44549	4.44717	4.44884	4.44878	4.44871	4.44806	4.44681	4.44557	4.44426	4.44295	4.4417	4.44051	4.43931	4.43828	4.43724	4.43631	4.43548	4.43466	4.43406	4.43346	4.43332	4.43364	4.43395	4.43851	4.44308
21	2	4.50283	4.50976	4.51669	4.52278	4.52804	4.5333	4.54096	4.54861	4.55669	4.56521	4.57374	4.58332	4.5929	4.60598	4.62256	4.63915	4.65591	4.67267	4.6873	4.69981	4.71231	4.72729	4.74228	4.75692	4.77122	4.78551	4.79731	4.80911	4.82089	4.83267	4.84445	4.85606	4.86767	4.87919	4.89063	4.90208	4.9135	4.92492	4.93509	4.94401	4.95293	4.95951	4.9661	4.97229	4.97809	4.98389	4.98576	4.98763
21	3	4.74034	4.74705	4.75376	4.75981	4.76519	4.77058	4.77503	4.77949	4.78286	4.78514	4.78742	4.78916	4.7909	4.79569	4.80353	4.81137	4.82291	4.83445	4.84695	4.8604	4.87385	4.88756	4.90128	4.9144	4.92692	4.93944	4.95064	4.96184	4.97305	4.98427	4.9955	5.00761	5.01972	5.03363	5.04935	5.06507	5.08346	5.10185	5.11851	5.13344	5.14837	5.15932	5.17028	5.18095	5.19134	5.20173	5.20875	5.21577
21	4	4.73784	4.74263	4.74743	4.75177	4.75568	4.75958	4.76626	4.77295	4.78014	4.78783	4.79552	4.80448	4.81344	4.82598	4.84211	4.85824	4.86544	4.87265	4.87789	4.88115	4.88442	4.89022	4.89602	4.90152	4.90673	4.91193	4.91473	4.91753	4.92009	4.92242	4.92475	4.92258	4.92042	4.91834	4.91634	4.91435	4.90895	4.90356	4.89994	4.89809	4.89624	4.90204	4.90784	4.91647	4.92793	4.93939	4.9466	4.9538
21	5	4.72299	4.72824	4.73349	4.73981	4.7472	4.75459	4.76191	4.76923	4.77612	4.78257	4.78902	4.79492	4.80081	4.8069	4.81321	4.81951	4.82654	4.83358	4.84075	4.84806	4.85538	4.86592	4.87647	4.88845	4.90186	4.91527	4.92933	4.94339	4.95641	4.96839	4.98037	4.99008	4.99979	5.01085	5.02328	5.03571	5.04782	5.05993	5.0712	5.08164	5.09208	5.1012	5.11032	5.11942	5.1285	5.13757	5.14665	5.15573
22	1	4.48303	4.48662	4.4902	4.49353	4.49658	4.49964	4.50228	4.50492	4.50768	4.51055	4.51343	4.51912	4.52482	4.53012	4.53502	4.53992	4.54436	4.54879	4.55366	4.55895	4.56425	4.57208	4.57991	4.58918	4.59989	4.6106	4.62139	4.63218	4.64228	4.65169	4.66109	4.66883	4.67656	4.68425	4.6919	4.69954	4.70719	4.71483	4.72336	4.73276	4.74216	4.75167	4.76118	4.76978	4.77747	4.78517	4.79577	4.80637
22	2	4.82819	4.83099	4.8338	4.83647	4.83901	4.84155	4.84489	4.84823	4.85215	4.85665	4.86115	4.86559	4.87002	4.87493	4.88033	4.88572	4.8914	4.89708	4.90288	4.90881	4.91474	4.92101	4.92729	4.93377	4.94047	4.94717	4.95393	4.96069	4.96782	4.9753	4.98279	4.99135	4.99992	5.00908	5.01883	5.02858	5.03849	5.04839	5.05886	5.06991	5.08095	5.0927	5.10445	5.1162	5.12795	5.1397	5.15145	5.1632
22	3	5.11074	5.10897	5.1072	5.10587	5.10498	5.1041	5.1047	5.10529	5.10665	5.10877	5.11088	5.11322	5.11555	5.1148	5.11094	5.10709	5.10233	5.09756	5.09276	5.08792	5.08307	5.07806	5.07304	5.06815	5.06339	5.05862	5.04839	5.03815	5.02861	5.01977	5.01092	5.00585	5.00078	4.9956	4.99032	4.98504	4.98613	4.98722	4.99085	4.99704	5.00322	5.0145	5.02579	5.03925	5.0549	5.07055	5.07947	5.08838
22	4	5.02802	5.03289	5.03776	5.0422	5.0462	5.0502	5.05185	5.05349	5.05413	5.05377	5.05341	5.05633	5.05924	5.06197	5.06453	5.06708	5.07115	5.07521	5.08012	5.08587	5.09163	5.09873	5.10583	5.11288	5.11988	5.12688	5.13387	5.14087	5.14787	5.15486	5.16186	5.16884	5.17582	5.18275	5.18964	5.19653	5.20342	5.2103	5.21719	5.22408	5.23097	5.23786	5.24475	5.25179	5.25899	5.26619	5.2791	5.29201
23	1	3.72321	3.72755	3.73189	3.7369	3.74258	3.74825	3.75421	3.76017	3.7657	3.77081	3.77593	3.77814	3.78036	3.78618	3.79559	3.805	3.81656	3.82812	3.84034	3.85322	3.8661	3.88028	3.89446	3.90971	3.92604	3.94238	3.95863	3.97488	3.99111	4.00733	4.02354	4.03963	4.05572	4.07151	4.08702	4.10252	4.11603	4.12954	4.14374	4.15864	4.17354	4.18897	4.20439	4.21933	4.23379	4.24824	4.26252	4.2768
23	2	4.92606	4.93773	4.94941	4.96005	4.96968	4.9793	4.9873	4.99529	5.00301	5.01044	5.01788	5.02814	5.0384	5.0503	5.06383	5.07737	5.08939	5.10141	5.11214	5.12157	5.131	5.13763	5.14426	5.14891	5.15158	5.15426	5.15653	5.15881	5.16101	5.16313	5.16525	5.16705	5.16885	5.16999	5.17045	5.17092	5.16882	5.16671	5.16441	5.16191	5.15942	5.15688	5.15433	5.15187	5.14951	5.14714	5.1481	5.14907
23	3	5.75174	5.75507	5.7584	5.76157	5.76457	5.76756	5.76884	5.77011	5.77035	5.76956	5.76878	5.76798	5.76719	5.76656	5.7661	5.76564	5.7654	5.76515	5.76531	5.76586	5.76641	5.7685	5.77059	5.77314	5.77615	5.77915	5.77971	5.78027	5.78017	5.77941	5.77865	5.77757	5.77648	5.77594	5.77593	5.77592	5.77586	5.7758	5.77602	5.77654	5.77705	5.77852	5.77999	5.78209	5.78483	5.78756	5.79166	5.79576
23	4	5.45097	5.45116	5.45134	5.45158	5.45186	5.45214	5.45257	5.453	5.45351	5.45411	5.4547	5.45545	5.45619	5.45693	5.45767	5.45841	5.45915	5.45989	5.46035	5.46054	5.46074	5.4597	5.45867	5.45763	5.4566	5.45557	5.45453	5.4535	5.45178	5.44938	5.44698	5.4435	5.44002	5.4377	5.43654	5.43539	5.43402	5.43265	5.43222	5.43271	5.43321	5.4349	5.43658	5.43834	5.44017	5.44199	5.44652	5.45104
23	5	5.22278	5.2268	5.23082	5.23459	5.23811	5.24162	5.24454	5.24747	5.25061	5.25398	5.25735	5.26598	5.2746	5.28293	5.29098	5.29902	5.30507	5.31113	5.31602	5.31973	5.32345	5.32486	5.32627	5.3276	5.32884	5.33009	5.33393	5.33777	5.34138	5.34477	5.34816	5.34963	5.35109	5.35172	5.35153	5.35133	5.34723	5.34313	5.3388	5.33425	5.3297	5.32515	5.3206	5.31615	5.31182	5.30748	5.30712	5.30676
24	1	4.69717	4.70563	4.71409	4.72311	4.73271	4.74231	4.75372	4.76512	4.77758	4.79107	4.80457	4.81982	4.83507	4.85032	4.86555	4.88078	4.89605	4.91131	4.9279	4.94581	4.96372	4.98749	5.01127	5.03453	5.05729	5.08004	5.10108	5.12213	5.14268	5.16274	5.1828	5.20278	5.22276	5.24364	5.26541	5.28717	5.30886	5.33054	5.35149	5.37171	5.39193	5.41046	5.42899	5.44665	5.46345	5.48025	5.49381	5.50738
24	2	4.71195	4.72479	4.73763	4.7488	4.75829	4.76779	4.77944	4.79109	4.80443	4.81946	4.8345	4.84353	4.85256	4.86169	4.87093	4.88017	4.88526	4.89034	4.89393	4.89603	4.89813	4.90007	4.902	4.90406	4.90623	4.9084	4.91057	4.91274	4.91486	4.91692	4.91898	4.92087	4.92276	4.92454	4.92623	4.92792	4.92961	4.9313	4.93292	4.93446	4.936	4.93745	4.93889	4.94034	4.94179	4.94324	4.94469	4.94613
24	3	5.02869	5.02949	5.0303	5.03117	5.03212	5.03307	5.03456	5.03605	5.03782	5.03989	5.04195	5.04376	5.04557	5.04751	5.04959	5.05166	5.05377	5.05588	5.05795	5.05997	5.06199	5.06358	5.06517	5.06258	5.05582	5.04906	5.04867	5.04828	5.04899	5.0508	5.05261	5.05283	5.05305	5.04962	5.04256	5.03549	5.03612	5.03675	5.03509	5.03114	5.02719	5.02268	5.01817	5.01675	5.01841	5.02007	5.03015	5.04023
24	4	4.89523	4.90767	4.9201	4.93084	4.93988	4.94891	4.95816	4.96741	4.97825	4.99069	5.00313	5.02208	5.04104	5.05741	5.07121	5.085	5.09804	5.11108	5.12321	5.13443	5.14565	5.15277	5.15989	5.16701	5.17414	5.18126	5.18383	5.18641	5.1882	5.1892	5.19021	5.19227	5.19434	5.19884	5.20576	5.21268	5.2196	5.22652	5.23338	5.24018	5.24698	5.25573	5.26449	5.2753	5.28814	5.30099	5.31403	5.32707
25	1	5.43063	5.43539	5.44014	5.44455	5.4486	5.45266	5.4576	5.46255	5.46819	5.47453	5.48087	5.48662	5.49236	5.49877	5.50582	5.51287	5.51989	5.5269	5.53413	5.54155	5.54898	5.55774	5.56649	5.57572	5.58544	5.59515	5.60484	5.61452	5.6242	5.63388	5.64355	5.65346	5.66337	5.6738	5.68477	5.69573	5.70806	5.72038	5.73248	5.74436	5.75623	5.76712	5.77801	5.78828	5.79792	5.80756	5.81658	5.82559
25	2	5.66311	5.67057	5.67803	5.6921	5.71278	5.73346	5.74921	5.76495	5.77503	5.77943	5.78383	5.79787	5.81191	5.82098	5.82509	5.8292	5.83909	5.84898	5.86131	5.8761	5.89088	5.90476	5.91863	5.92098	5.91179	5.90261	5.8931	5.88359	5.86866	5.84832	5.82798	5.79938	5.77078	5.75189	5.74271	5.73353	5.72395	5.71437	5.70841	5.70606	5.70372	5.70578	5.70784	5.70976	5.71155	5.71334	5.71555	5.71776
25	3	5.88428	5.8971	5.90993	5.92365	5.93827	5.95289	5.96887	5.98486	6.00073	6.01649	6.03224	6.04199	6.05174	6.06148	6.07123	6.08098	6.0867	6.09242	6.09455	6.09309	6.09164	6.08053	6.06942	6.06164	6.05719	6.05274	6.04829	6.04384	6.03939	6.03494	6.03049	6.02604	6.02159	6.01714	6.01269	6.00824	6.00992	6.0116	6.01364	6.01602	6.01841	6.02079	6.02317	6.02555	6.02792	6.03029	6.03241	6.03453
25	4	5.74905	5.75607	5.76309	5.7692	5.77439	5.77959	5.78613	5.79267	5.80055	5.80977	5.81899	5.82821	5.83743	5.84057	5.83764	5.83471	5.82581	5.81691	5.80764	5.79802	5.78839	5.78349	5.77859	5.77024	5.75842	5.74661	5.7346	5.72259	5.71376	5.70811	5.70246	5.70559	5.70872	5.71476	5.72371	5.73266	5.73525	5.73783	5.74215	5.74821	5.75427	5.76532	5.77638	5.7898	5.80559	5.82137	5.83716	5.85295
26	1	5.15659	5.15659	5.15659	5.15659	5.15659	5.15659	5.15872	5.16085	5.16426	5.16896	5.17365	5.17732	5.18098	5.18491	5.1891	5.1933	5.19747	5.20165	5.20579	5.2099	5.21401	5.21811	5.22222	5.22624	5.23019	5.23413	5.23808	5.24202	5.24597	5.24991	5.25386	5.25698	5.2601	5.26133	5.26067	5.26002	5.25936	5.25871	5.258	5.25724	5.25649	5.25572	5.25496	5.25424	5.25358	5.25291	5.2521	5.25128
26	2	5.31565	5.32244	5.32923	5.33524	5.34045	5.34567	5.34721	5.34875	5.34911	5.34828	5.34745	5.35534	5.36322	5.36852	5.37125	5.37397	5.37943	5.38489	5.39068	5.39681	5.40294	5.40512	5.4073	5.40937	5.41134	5.41331	5.41967	5.42604	5.4318	5.43695	5.4421	5.44407	5.44604	5.448	5.44997	5.45194	5.45902	5.4661	5.47165	5.47567	5.4797	5.48342	5.48714	5.49283	5.50049	5.50816	5.51582	5.52349
26	3	5.64317	5.64929	5.6554	5.66078	5.66543	5.67007	5.67564	5.6812	5.68739	5.69421	5.70102	5.70405	5.70708	5.70657	5.70252	5.69848	5.69288	5.68729	5.68051	5.67254	5.66457	5.65205	5.63953	5.62701	5.61449	5.60197	5.59321	5.58445	5.57586	5.56745	5.55904	5.54942	5.53979	5.52989	5.51972	5.50955	5.50347	5.49738	5.49146	5.48571	5.47995	5.4742	5.46845	5.46295	5.45769	5.45244	5.45302	5.4536
26	4	5.40579	5.40995	5.41411	5.42031	5.42856	5.43681	5.45257	5.46833	5.48686	5.50815	5.52944	5.53916	5.54888	5.5617	5.57761	5.59352	5.61453	5.63553	5.65585	5.67549	5.69512	5.70492	5.71472	5.72107	5.72395	5.72684	5.72972	5.73261	5.73379	5.73328	5.73277	5.72574	5.71872	5.70587	5.68719	5.66852	5.65622	5.64391	5.63189	5.62016	5.60842	5.5965	5.58457	5.57256	5.56046	5.54836	5.53626	5.52416
26	5	5.25592	5.25657	5.25723	5.25828	5.25972	5.26116	5.2629	5.26465	5.26731	5.27088	5.27445	5.28803	5.30161	5.315	5.3282	5.3414	5.34782	5.35424	5.35651	5.35462	5.35273	5.34265	5.33258	5.32272	5.31308	5.30343	5.29346	5.28349	5.27346	5.26338	5.2533	5.24313	5.23297	5.22263	5.21211	5.20159	5.21231	5.22302	5.23131	5.23717	5.24304	5.24829	5.25355	5.26273	5.27585	5.28898	5.30168	5.31439
[truncated: 78 more columns]

## Sheet: Control4
Session	Step	1	2	3	4	5	6	7	8	9	10	11	12	13	14	15	16	17	18	19	20	21	22	23	24	25	26	27	28	29	30	31	32	33	34	35	36	37	38	39	40	41	42	43	44	45	46	47	48
1	1	4.76941	4.77518	4.78095	4.78438	4.78495	4.78552	4.7891	4.79303	4.79688	4.8006	4.80432	4.80983	4.8158	4.82231	4.8305	4.83869	4.84366	4.84721	4.85127	4.85835	4.86543	4.87159	4.8771	4.88276	4.89163	4.9005	4.91017	4.92067	4.93117	4.93907	4.94681	4.95512	4.96435	4.97358	4.98525	4.99739	5.00887	5.01867	5.02847	5.03653	5.04396	5.0519	5.06209	5.07228	5.08322	5.09461	5.10588	5.11587
1	2	5.08683	5.08546	5.08408	5.08508	5.08897	5.09287	5.09442	5.09571	5.09692	5.09799	5.09906	5.10131	5.10386	5.10622	5.10798	5.10974	5.11335	5.11777	5.12234	5.12779	5.13323	5.14005	5.14782	5.15573	5.16702	5.1783	5.19026	5.20292	5.21558	5.22745	5.23928	5.25141	5.26405	5.27668	5.28906	5.30138	5.31351	5.32516	5.33681	5.35037	5.36462	5.37893	5.39347	5.40802	5.42226	5.43634	5.45022	5.46196
1	3	4.74325	4.75308	4.7629	4.76843	4.76868	4.76894	4.76206	4.75437	4.7492	4.74875	4.7483	4.74506	4.74111	4.73665	4.73059	4.72454	4.72695	4.73309	4.7392	4.74515	4.7511	4.75462	4.75647	4.75827	4.75899	4.7597	4.76041	4.76113	4.76184	4.76256	4.76327	4.76398	4.7647	4.76541	4.76605	4.76669	4.76763	4.76936	4.7711	4.77591	4.78183	4.78902	4.80182	4.81462	4.83057	4.84836	4.8659	4.88074
2	1	4.05783	4.05783	4.05783	4.05783	4.05783	4.05783	4.05783	4.05783	4.05783	4.05783	4.05783	4.05783	4.05783	4.05782	4.05776	4.05771	4.05747	4.05715	4.0568	4.05622	4.05564	4.05494	4.05415	4.05335	4.05237	4.05139	4.05037	4.04931	4.04826	4.04976	4.05143	4.05534	4.06278	4.07022	4.07893	4.08788	4.09605	4.10228	4.1085	4.11027	4.11043	4.11033	4.10914	4.10795	4.10687	4.10587	4.10502	4.10596
2	2	4.67211	4.67005	4.668	4.66613	4.6645	4.66288	4.66201	4.66123	4.66112	4.6623	4.66347	4.66647	4.66993	4.67365	4.67817	4.68269	4.68603	4.68884	4.6911	4.69005	4.689	4.69192	4.69758	4.70315	4.70688	4.7106	4.71271	4.71316	4.7136	4.71251	4.71132	4.71041	4.70996	4.70951	4.71216	4.71541	4.71835	4.72053	4.72271	4.72289	4.72234	4.7227	4.72713	4.73156	4.73721	4.74358	4.74981	4.75445
2	3	4.18291	4.18878	4.19465	4.20556	4.22267	4.23978	4.25712	4.27448	4.29225	4.31081	4.32937	4.35084	4.37307	4.39461	4.41405	4.43349	4.43311	4.42399	4.41638	4.41787	4.41937	4.41248	4.39982	4.38727	4.37744	4.36761	4.36125	4.35849	4.35574	4.35764	4.35984	4.36314	4.36818	4.37321	4.38417	4.39628	4.40839	4.42051	4.43262	4.44473	4.45685	4.46815	4.47587	4.48358	4.49125	4.49889	4.50706	4.52115
2	4	3.98828	4.02695	4.06563	4.09707	4.11963	4.14219	4.16192	4.18133	4.1991	4.21377	4.22844	4.23415	4.23756	4.23779	4.22823	4.21868	4.20912	4.19956	4.19274	4.20229	4.21185	4.22141	4.23096	4.24052	4.25008	4.25963	4.27629	4.30035	4.32441	4.36208	4.40065	4.43982	4.47998	4.52013	4.56695	4.61507	4.65773	4.68673	4.71574	4.72698	4.73182	4.73459	4.72822	4.72185	4.71347	4.70391	4.69435	4.6848
2	5	4.22762	4.22819	4.22875	4.22646	4.22069	4.21492	4.20371	4.19189	4.18591	4.19095	4.19598	4.21836	4.24519	4.27295	4.30361	4.33426	4.36049	4.38477	4.40901	4.43302	4.45703	4.48481	4.5152	4.54479	4.55588	4.56697	4.56921	4.56224	4.55527	4.54578	4.53612	4.53143	4.53456	4.53769	4.55167	4.56777	4.58168	4.59013	4.59858	4.61172	4.62654	4.6435	4.66997	4.69644	4.72136	4.74537	4.76875	4.78512
2	6	4.32596	4.32682	4.32769	4.32955	4.33264	4.33573	4.33955	4.34345	4.34729	4.35103	4.35477	4.35808	4.36129	4.36438	4.36713	4.36987	4.37235	4.3747	4.37737	4.38193	4.38649	4.39217	4.39863	4.40515	4.41297	4.4208	4.42823	4.43527	4.4423	4.44885	4.45537	4.46252	4.47066	4.4788	4.48726	4.49578	4.50408	4.51181	4.51955	4.52607	4.53215	4.53851	4.54615	4.55378	4.56138	4.56896	4.57644	4.5828
3	1	4.9626	4.96307	4.96355	4.96403	4.96451	4.96499	4.96412	4.9631	4.96001	4.953	4.94599	4.93391	4.92054	4.90677	4.8918	4.87683	4.86186	4.84689	4.83195	4.81722	4.80249	4.78767	4.7728	4.75805	4.74626	4.73448	4.72893	4.72989	4.73084	4.72582	4.72041	4.71557	4.71166	4.70774	4.7077	4.70842	4.7092	4.71016	4.71112	4.70856	4.70474	4.70063	4.69521	4.6898	4.68841	4.68937	4.68981	4.68439
3	2	4.99978	5.00061	5.00144	4.99975	4.99496	4.99018	4.98648	4.98291	4.98122	4.98309	4.98496	4.98343	4.98102	4.97784	4.97223	4.96662	4.96083	4.95496	4.94962	4.94747	4.94531	4.94316	4.94101	4.939	4.94057	4.94213	4.94369	4.94525	4.94682	4.94827	4.94972	4.94973	4.94747	4.9452	4.94605	4.9475	4.95001	4.95518	4.96035	4.9627	4.96404	4.96606	4.97112	4.97617	4.98123	4.98628	4.99135	4.99652
3	3	5.29467	5.2936	5.29253	5.29205	5.29231	5.29258	5.29551	5.29874	5.30184	5.30469	5.30754	5.31021	5.31283	5.31467	5.3141	5.31353	5.31365	5.31406	5.31502	5.31928	5.32353	5.32686	5.32954	5.33217	5.33358	5.33499	5.33516	5.33404	5.33292	5.33095	5.32892	5.32595	5.32149	5.31704	5.3138	5.3108	5.30825	5.30682	5.30538	5.30219	5.29836	5.29447	5.29032	5.28618	5.28375	5.28231	5.28078	5.27809
3	4	5.14728	5.15648	5.16567	5.17517	5.18505	5.19492	5.20616	5.21756	5.23377	5.25906	5.28436	5.31641	5.35019	5.38097	5.40247	5.42396	5.44486	5.4655	5.48616	5.50694	5.52773	5.54851	5.5693	5.59009	5.61087	5.63166	5.64687	5.65628	5.66569	5.67342	5.68105	5.68873	5.69652	5.70431	5.71476	5.72573	5.73768	5.75207	5.76645	5.78095	5.7955	5.81005	5.82466	5.83926	5.85398	5.86876	5.88353	5.89823
3	5	4.47816	4.47946	4.48076	4.48202	4.48326	4.48449	4.4856	4.4867	4.48775	4.48871	4.48967	4.49056	4.49144	4.4923	4.49309	4.49389	4.49467	4.49544	4.49621	4.49694	4.49766	4.49837	4.49906	4.49976	4.50043	4.50111	4.50094	4.49991	4.49887	4.49791	4.49696	4.49666	4.4974	4.49813	4.49808	4.49788	4.49739	4.49619	4.49498	4.49491	4.49524	4.49554	4.49569	4.49583	4.49274	4.48776	4.48272	4.47699
4	1	4.89451	4.89511	4.89572	4.89784	4.90182	4.90579	4.9121	4.91868	4.92547	4.93266	4.93986	4.9463	4.95255	4.95863	4.96419	4.96975	4.97676	4.98441	4.99234	5.00198	5.01161	5.02256	5.03442	5.04626	5.05786	5.06946	5.08058	5.0912	5.10182	5.11447	5.12726	5.14005	5.15284	5.16564	5.18056	5.1959	5.21083	5.22472	5.23861	5.2528	5.26709	5.28154	5.29667	5.3118	5.32533	5.33794	5.35011	5.3574
4	2	4.95155	4.9542	4.95685	4.95717	4.95463	4.95209	4.94887	4.94557	4.94358	4.94402	4.94446	4.94964	4.95602	4.96121	4.96272	4.96423	4.96245	4.95922	4.95686	4.95971	4.96256	4.96757	4.97407	4.9806	4.98809	4.99558	5.00503	5.01651	5.02799	5.03947	5.05095	5.06243	5.0739	5.08538	5.09686	5.10834	5.12027	5.13331	5.14635	5.16149	5.17739	5.19152	5.1978	5.20408	5.21036	5.21663	5.22292	5.22934
4	3	5.12782	5.12944	5.13107	5.13463	5.14057	5.14652	5.15149	5.15635	5.16093	5.16499	5.16904	5.17544	5.18244	5.1892	5.1952	5.2012	5.20665	5.21185	5.2177	5.22748	5.23727	5.24881	5.26156	5.27431	5.28694	5.29958	5.31075	5.32041	5.33007	5.33961	5.34915	5.35988	5.37252	5.38515	5.3927	5.39926	5.40667	5.41621	5.42575	5.43756	5.45019	5.46116	5.46475	5.46834	5.47388	5.48057	5.48701	5.49073
5	1	4.92139	4.93024	4.9391	4.94724	4.9545	4.96175	4.96786	4.97384	4.97949	4.98451	4.98953	4.9946	4.99969	5.00508	5.01142	5.01777	5.02529	5.03333	5.0417	5.05207	5.06243	5.07459	5.08799	5.10144	5.11584	5.13024	5.14295	5.15388	5.16481	5.17607	5.18736	5.19802	5.2077	5.21739	5.22457	5.23126	5.23791	5.24444	5.25097	5.25751	5.26405	5.26986	5.27239	5.27493	5.27715	5.27917	5.2813	5.28465
5	2	4.92551	4.93824	4.95096	4.9585	4.95969	4.96087	4.96118	4.96138	4.96188	4.96293	4.96397	4.96345	4.96252	4.96081	4.95668	4.95255	4.94939	4.94665	4.94393	4.94138	4.93883	4.93317	4.92537	4.91763	4.91123	4.90483	4.9013	4.90074	4.90019	4.90143	4.90279	4.90726	4.91664	4.92603	4.94299	4.96143	4.97972	4.99762	5.01552	5.02896	5.0408	5.05229	5.06223	5.07218	5.08212	5.09207	5.10201	5.11196
5	3	4.92778	4.93502	4.94225	4.95245	4.96629	4.98012	4.99453	5.009	5.02695	5.05144	5.07593	5.0891	5.09936	5.11099	5.1268	5.14261	5.15357	5.16239	5.16954	5.16661	5.16369	5.16841	5.17841	5.18823	5.19378	5.19932	5.21424	5.23892	5.2636	5.2655	5.26591	5.26632	5.26674	5.26715	5.25658	5.24386	5.23757	5.24732	5.25707	5.26241	5.26616	5.27269	5.29158	5.31047	5.32009	5.32431	5.32822	5.32853
5	4	4.90539	4.93003	4.95466	4.97061	4.9759	4.98119	4.98946	4.99808	5.00396	5.0047	5.00545	5.00516	5.00462	5.00602	5.01341	5.0208	5.03101	5.04246	5.05328	5.06024	5.06721	5.0732	5.07852	5.08385	5.08936	5.09487	5.08831	5.06916	5.05001	5.06612	5.08453	5.09481	5.09223	5.08966	5.08582	5.08175	5.08025	5.08518	5.09012	5.10229	5.11706	5.13364	5.1582	5.18276	5.21075	5.24073	5.26911	5.27938
5	5	5.33077	5.33991	5.34905	5.35447	5.35532	5.35617	5.35975	5.36363	5.36849	5.37518	5.38187	5.39333	5.40601	5.42053	5.44071	5.4609	5.47863	5.49527	5.51145	5.52481	5.53817	5.55407	5.57174	5.58906	5.59817	5.60728	5.61802	5.63044	5.64287	5.65293	5.66284	5.67043	5.67437	5.67831	5.67576	5.67195	5.66614	5.65534	5.64454	5.63965	5.63688	5.63556	5.64065	5.64574	5.65237	5.65989	5.66762	5.67763
6	1	4.78657	4.78707	4.78757	4.78832	4.78938	4.79044	4.79244	4.79454	4.7968	4.79937	4.80194	4.8034	4.80457	4.80546	4.80549	4.80552	4.80553	4.80553	4.8055	4.80531	4.80512	4.80462	4.8039	4.80313	4.80123	4.79932	4.79788	4.79692	4.79596	4.79564	4.79536	4.79492	4.79424	4.79355	4.79207	4.79044	4.78873	4.78681	4.7849	4.78295	4.78098	4.77891	4.77638	4.77386	4.77088	4.76764	4.76436	4.7607
6	2	4.55391	4.5476	4.5413	4.53396	4.52537	4.51677	4.51252	4.50876	4.50703	4.50912	4.51121	4.51309	4.51492	4.51764	4.52311	4.52857	4.5341	4.53966	4.54522	4.55079	4.55635	4.56189	4.56742	4.57294	4.57836	4.58377	4.59102	4.60017	4.60933	4.6238	4.63862	4.65504	4.67401	4.69297	4.71259	4.73234	4.7502	4.76336	4.77651	4.78967	4.80282	4.81501	4.82291	4.8308	4.83703	4.8423	4.84762	4.85351
6	3	4.80947	4.82854	4.84761	4.87305	4.9063	4.93955	4.95361	4.96549	4.96636	4.9465	4.92664	4.89592	4.86241	4.84176	4.86077	4.87978	4.89058	4.89775	4.90779	4.93495	4.96212	5.00229	5.05142	5.09938	5.11978	5.14017	5.11841	5.05273	4.98705	4.95204	4.91903	4.89557	4.88716	4.87876	4.88182	4.88711	4.89671	4.9171	4.9375	4.96993	5.0067	5.0393	5.05334	5.06737	5.06918	5.06388	5.05773	5.04197
6	4	5.01862	5.02052	5.02243	5.02571	5.03067	5.03564	5.04124	5.04691	5.05261	5.05836	5.0641	5.07099	5.07817	5.08575	5.09455	5.10334	5.10923	5.11384	5.11803	5.11975	5.12146	5.12257	5.12325	5.12399	5.12622	5.12845	5.13015	5.1313	5.13245	5.13379	5.13514	5.13774	5.14234	5.14693	5.15396	5.16146	5.16746	5.16972	5.17199	5.1719	5.17097	5.16954	5.16592	5.16229	5.1614	5.16209	5.1634	5.17176
6	5	4.70759	4.72369	4.73979	4.75578	4.77161	4.78745	4.80263	4.81773	4.83239	4.84624	4.86008	4.87239	4.8843	4.89633	4.90871	4.9211	4.93756	4.95582	4.97479	4.99803	5.02128	5.04664	5.07347	5.10037	5.12895	5.15753	5.18484	5.21083	5.23682	5.26366	5.29056	5.31785	5.34576	5.37366	5.40217	5.43079	5.45943	5.48812	5.51681	5.54186	5.56561	5.5886	5.60829	5.62797	5.64596	5.66297	5.67997	5.69685
7	1	4.95472	4.95425	4.95379	4.95436	4.95621	4.95806	4.96102	4.9641	4.96712	4.97	4.97288	4.97701	4.98147	4.98596	4.99061	4.99525	4.99979	5.0043	5.0087	5.01249	5.01627	5.01982	5.02319	5.02659	5.03033	5.03407	5.03811	5.04246	5.04681	5.05199	5.05723	5.06188	5.06563	5.06937	5.07254	5.07559	5.07852	5.08114	5.08375	5.08282	5.08061	5.07907	5.08056	5.08204	5.08374	5.08556	5.08709	5.08546
7	2	5.06439	5.07552	5.08665	5.09641	5.10449	5.11257	5.11801	5.12316	5.12721	5.12922	5.13123	5.13763	5.14517	5.15222	5.15775	5.16329	5.16792	5.17216	5.17682	5.18399	5.19116	5.19452	5.19525	5.19608	5.19938	5.20269	5.2084	5.21662	5.22484	5.2375	5.25046	5.26233	5.27247	5.28261	5.29301	5.30345	5.31448	5.32699	5.33951	5.35521	5.37206	5.38918	5.40749	5.4258	5.44495	5.46459	5.48433	5.50531
7	3	5.00398	5.02074	5.03751	5.04757	5.04941	5.05124	5.04739	5.0429	5.04032	5.04133	5.04233	5.04371	5.04518	5.0457	5.04329	5.04088	5.03804	5.03502	5.03349	5.0409	5.04831	5.05026	5.04843	5.04672	5.04784	5.04896	5.05289	5.05974	5.06659	5.07613	5.08586	5.09553	5.10512	5.1147	5.12614	5.13793	5.15071	5.16596	5.18121	5.19412	5.20617	5.21725	5.22399	5.23072	5.23623	5.24102	5.24594	5.25237
7	4	4.83207	4.82783	4.82359	4.81828	4.81167	4.80506	4.79893	4.79286	4.78847	4.78727	4.78607	4.78222	4.77768	4.77458	4.77589	4.7772	4.78292	4.79057	4.79907	4.81263	4.82618	4.83609	4.84348	4.85106	4.86304	4.87501	4.88924	4.90581	4.92237	4.92454	4.92577	4.927	4.92822	4.92945	4.93068	4.9319	4.93313	4.93436	4.93559	4.93681	4.93804	4.93927	4.94049	4.94172	4.94389	4.9466	4.94958	4.95566
7	5	4.8397	4.84397	4.84823	4.85228	4.85605	4.85983	4.86289	4.86588	4.86841	4.87009	4.87177	4.87136	4.87041	4.86974	4.86989	4.87004	4.87125	4.87293	4.87487	4.87843	4.88199	4.88557	4.88916	4.89271	4.89524	4.89777	4.89971	4.90106	4.9024	4.90384	4.90528	4.90672	4.90816	4.90961	4.91143	4.91333	4.91545	4.91812	4.9208	4.92515	4.9301	4.93594	4.94572	4.95551	4.9668	4.97897	4.99114	5.00326
7	6	5.11111	5.11945	5.1278	5.13562	5.14279	5.14997	5.15716	5.16435	5.17214	5.18108	5.19002	5.19781	5.2053	5.21299	5.22131	5.22963	5.23906	5.24898	5.25938	5.27271	5.28603	5.29941	5.31281	5.32634	5.34266	5.35898	5.37624	5.39449	5.41273	5.42103	5.42868	5.43809	5.45028	5.46247	5.47596	5.4897	5.50343	5.51715	5.53086	5.54252	5.55343	5.56545	5.58238	5.59932	5.61583	5.6321	5.6477	5.65563
8	1	5.61303	5.61953	5.62603	5.63292	5.64027	5.64761	5.65627	5.66508	5.67255	5.6775	5.68244	5.6867	5.69079	5.69609	5.70511	5.71414	5.72267	5.73098	5.73917	5.74667	5.75416	5.76439	5.77651	5.78864	5.80115	5.81366	5.82514	5.83554	5.84594	5.85198	5.85774	5.86212	5.86433	5.86654	5.87948	5.89451	5.90888	5.92155	5.93423	5.94129	5.94632	5.95135	5.95638	5.96141	5.96633	5.97118	5.9756	5.97517
8	2	5.49555	5.49705	5.49854	5.50063	5.50344	5.50626	5.51112	5.51622	5.52105	5.52538	5.52972	5.53376	5.53774	5.54154	5.54479	5.54805	5.55203	5.55635	5.56083	5.56635	5.57187	5.57929	5.58804	5.59678	5.60563	5.61447	5.62224	5.6289	5.63555	5.64662	5.65797	5.67071	5.68565	5.70059	5.71553	5.73047	5.74447	5.7561	5.76774	5.77371	5.77764	5.78225	5.78988	5.7975	5.80619	5.81549	5.82437	5.82848
9	1	4.33553	4.34017	4.34482	4.34766	4.3483	4.34894	4.3494	4.34984	4.35133	4.35483	4.35833	4.35843	4.35766	4.35807	4.36208	4.36609	4.37252	4.38003	4.38786	4.39759	4.40731	4.41485	4.42088	4.42714	4.43863	4.45012	4.46257	4.47602	4.48947	4.50253	4.51556	4.52721	4.53665	4.5461	4.55802	4.57042	4.58261	4.59427	4.60593	4.61597	4.62541	4.63486	4.64431	4.65375	4.66134	4.66786	4.6743	4.68001
9	2	4.61798	4.62135	4.62472	4.62676	4.62716	4.62757	4.62876	4.63004	4.63279	4.6383	4.64382	4.64928	4.65473	4.65965	4.66294	4.66623	4.66928	4.67222	4.67531	4.67933	4.68334	4.68894	4.69564	4.70232	4.70841	4.71451	4.72089	4.72755	4.73421	4.74204	4.74995	4.75828	4.76727	4.77626	4.78584	4.79554	4.80556	4.81643	4.8273	4.83899	4.85099	4.86283	4.87395	4.88506	4.89641	4.90789	4.91919	4.92849
9	3	4.4124	4.41312	4.41383	4.40972	4.39967	4.38963	4.37968	4.36975	4.36349	4.36415	4.36481	4.38994	4.42135	4.44811	4.46057	4.47302	4.47507	4.47253	4.46865	4.45676	4.44487	4.45491	4.48008	4.50511	4.52671	4.54832	4.56864	4.58763	4.60663	4.62384	4.64094	4.65804	4.67514	4.69223	4.68653	4.67638	4.66629	4.65636	4.64643	4.6455	4.64783	4.65087	4.65705	4.66322	4.66669	4.66859	4.67153	4.68625
10	1	5.15119	5.14599	5.14079	5.13664	5.13377	5.1309	5.12648	5.12188	5.11635	5.10909	5.10182	5.09455	5.08729	5.0822	5.08384	5.08548	5.08273	5.07804	5.07359	5.07054	5.0675	5.06625	5.06625	5.06596	5.05869	5.05142	5.04416	5.03689	5.02962	5.02813	5.027	5.02844	5.03391	5.03939	5.04772	5.05661	5.06342	5.06502	5.06663	5.07407	5.08363	5.09333	5.10372	5.11411	5.12456	5.13504	5.14552	5.15601
10	2	5.20048	5.19903	5.19758	5.19507	5.19125	5.18743	5.18266	5.17779	5.17293	5.16811	5.16328	5.15927	5.15545	5.15164	5.14783	5.14402	5.13585	5.12577	5.11537	5.10307	5.09077	5.07911	5.06789	5.0568	5.04862	5.04044	5.03428	5.03025	5.02621	5.02568	5.02537	5.02464	5.02323	5.02183	5.01738	5.01233	5.00701	5.00102	4.99502	4.99421	4.99527	4.99644	4.99809	4.99974	5.00039	5.00047	5.00032	4.99755
10	3	4.75325	4.76777	4.78229	4.79588	4.80835	4.82081	4.83143	4.84185	4.85268	4.86429	4.87591	4.89449	4.91485	4.93635	4.96139	4.98643	5.01395	5.04257	5.07044	5.09385	5.11727	5.13558	5.15038	5.16502	5.17606	5.1871	5.19594	5.20248	5.20903	5.21852	5.2282	5.23806	5.24821	5.25836	5.26703	5.27542	5.28325	5.2897	5.29615	5.29287	5.28608	5.27967	5.27498	5.27029	5.26786	5.26674	5.26604	5.27
11	1	4.83816	4.89583	4.95349	4.9933	5.0112	5.02911	5.02798	5.02468	5.02515	5.03271	5.04027	5.04495	5.04888	5.04882	5.03641	5.02399	4.99992	4.97071	4.94443	4.93581	4.92718	4.92695	4.93251	4.9382	4.94702	4.95584	4.96509	4.97478	4.98447	4.99767	5.01109	5.02834	5.05161	5.07488	5.10718	5.14124	5.17593	5.21221	5.24848	5.28192	5.31434	5.34661	5.37817	5.40974	5.439	5.46692	5.49394	5.51082
11	2	5.23552	5.26332	5.29111	5.31391	5.33059	5.34726	5.35101	5.35329	5.35167	5.3427	5.33374	5.32517	5.31669	5.31016	5.3096	5.30905	5.29937	5.28567	5.27071	5.2482	5.22569	5.20671	5.19017	5.17442	5.1771	5.17978	5.19179	5.21351	5.23524	5.26359	5.29238	5.31991	5.34546	5.37101	5.39092	5.40973	5.42877	5.44838	5.46798	5.49091	5.51504	5.53719	5.55057	5.56395	5.56765	5.56575	5.56326	5.55431
11	3	5.32328	5.33413	5.34499	5.35461	5.3627	5.3708	5.37731	5.38364	5.39099	5.40026	5.40954	5.42004	5.43087	5.44362	5.46229	5.48095	5.49605	5.50957	5.52272	5.53365	5.54458	5.55548	5.56636	5.57724	5.58812	5.599	5.60988	5.62076	5.63164	5.64489	5.6583	5.67167	5.68497	5.69828	5.71133	5.72433	5.73699	5.74878	5.76057	5.77077	5.78039	5.79088	5.80516	5.81945	5.83086	5.84059	5.84996	5.85514
11	4	5.12332	5.12185	5.12038	5.12034	5.12203	5.12373	5.1266	5.1296	5.13246	5.13505	5.13763	5.13791	5.13759	5.13763	5.13879	5.13994	5.14172	5.14376	5.14584	5.14812	5.15039	5.15367	5.15763	5.16169	5.16814	5.17459	5.18212	5.19078	5.19944	5.20997	5.22062	5.23207	5.24478	5.25749	5.27115	5.285	5.29863	5.31172	5.3248	5.33649	5.34767	5.3585	5.36771	5.37692	5.38579	5.39446	5.40335	5.41463
11	5	5.62387	5.62808	5.63229	5.63436	5.63381	5.63326	5.63441	5.63576	5.63706	5.63825	5.63945	5.64051	5.64155	5.64349	5.64824	5.65299	5.65621	5.65876	5.66081	5.65982	5.65884	5.65828	5.65801	5.6578	5.65898	5.66016	5.66111	5.6618	5.6625	5.66118	5.65973	5.6573	5.65334	5.64938	5.64566	5.642	5.63812	5.63367	5.62922	5.62243	5.61481	5.60724	5.59995	5.59266	5.584	5.57455	5.56516	5.55644
11	6	4.45103	4.46517	4.47932	4.4961	4.51611	4.53612	4.56296	4.59056	4.61125	4.61889	4.62654	4.63489	4.64341	4.65589	4.68053	4.70517	4.73269	4.76147	4.78956	4.81349	4.83742	4.84666	4.84575	4.84436	4.8317	4.81903	4.80649	4.79409	4.78168	4.77605	4.77086	4.76927	4.77338	4.77748	4.78703	4.79764	4.80798	4.81765	4.82732	4.83125	4.83311	4.83481	4.83579	4.83678	4.8415	4.84838	4.85659	4.87976
12	1	4.68711	4.69356	4.70001	4.7056	4.71014	4.71468	4.72055	4.72657	4.73312	4.74065	4.74818	4.75601	4.76392	4.77182	4.77972	4.78762	4.79539	4.80309	4.8108	4.81854	4.82629	4.83525	4.84506	4.85499	4.86767	4.88034	4.89407	4.90889	4.92372	4.93841	4.95309	4.96669	4.9786	4.99051	4.99527	4.99863	5.00264	5.00825	5.01387	5.01867	5.02317	5.02703	5.02802	5.029	5.02971	5.03024	5.03031	5.02511
12	2	4.60685	4.61372	4.62059	4.627	4.63282	4.63865	4.64563	4.65275	4.65915	4.6642	4.66925	4.67126	4.67249	4.67414	4.6771	4.68007	4.68303	4.68599	4.68995	4.69994	4.70992	4.72133	4.73371	4.74608	4.75803	4.76998	4.7815	4.79256	4.80362	4.81578	4.82801	4.84047	4.85327	4.86607	4.8759	4.88515	4.89394	4.90154	4.90915	4.917	4.92495	4.93312	4.94232	4.95153	4.96099	4.9706	4.97995	4.98631
12	3	5.23979	5.20337	5.16694	5.13726	5.11585	5.09444	5.07168	5.04876	5.02879	5.01437	4.99995	5.00529	5.01571	5.03325	5.07279	5.11232	5.15186	5.1914	5.22867	5.25236	5.27606	5.29066	5.29898	5.30701	5.30835	5.30968	5.30984	5.30879	5.30774	5.30106	5.294	5.29744	5.31743	5.33742	5.35741	5.3774	5.39739	5.41738	5.43737	5.46069	5.4852	5.51021	5.53735	5.56449	5.58713	5.60715	5.6272	5.64764
12	4	4.36016	4.35698	4.3538	4.35089	4.34831	4.34573	4.3457	4.34596	4.34785	4.35282	4.35778	4.36523	4.37331	4.38042	4.38456	4.38869	4.39248	4.39613	4.39978	4.40341	4.40703	4.41076	4.41455	4.41835	4.42225	4.42615	4.43054	4.43546	4.44038	4.44839	4.4566	4.46578	4.47651	4.48723	4.49911	4.51122	4.52338	4.53564	4.54791	4.56089	4.57413	4.58755	4.60177	4.61599	4.62979	4.64332	4.65669	4.66803
[truncated: 78 more columns]

## Sheet: TeTX1.xls
Session	Step	1	2	3	4	5	6	7	8	9	10	11	12	13	14	15	16	17	18	19	20	21	22	23	24	25	26	27	28	29	30	31	32	33	34	35	36	37	38	39	40	41	42	43	44	45	46	47	48
1	1	6.45833	6.45541	6.45341	6.45399	6.45479	6.45579	6.45771	6.46008	6.46593	6.47366	6.48537	6.49696	6.50847	6.52025	6.53217	6.54489	6.55778	6.57093	6.58379	6.5965	6.60821	6.61958	6.62972	6.6392	6.64778	6.65695	6.66638	6.67617	6.68582	6.6949	6.70378	6.71246	6.71924	6.72541	6.7332	6.74033	6.74578	6.74961	6.75209	6.75226	6.75154	6.74647	6.7427	6.74153	6.74152	6.7423	6.74174	6.74079
1	2	5.41226	5.38518	5.35866	5.33369	5.31137	5.29143	5.27374	5.25667	5.23992	5.22546	5.21586	5.20763	5.20037	5.19182	5.1839	5.18285	5.18302	5.18525	5.18523	5.18394	5.18857	5.19378	5.1987	5.20472	5.21222	5.22231	5.23355	5.24961	5.26537	5.2793	5.29556	5.3143	5.33399	5.35397	5.37083	5.38954	5.41307	5.43337	5.45093	5.46811	5.48479	5.49591	5.5077	5.52081	5.53462	5.5489	5.56682	5.5861
1	3	6.07825	6.08077	6.08565	6.09716	6.1095	6.12258	6.13558	6.14872	6.16463	6.18115	6.19898	6.21732	6.23605	6.25378	6.27123	6.2879	6.30469	6.32168	6.33631	6.3496	6.36128	6.3753	6.40193	6.4333	6.47095	6.50871	6.54652	6.58424	6.62155	6.6574	6.69334	6.72936	6.75693	6.7814	6.78668	6.79102	6.7929	6.79415	6.79485	6.79584	6.79693	6.79841	6.79983	6.80113	6.80132	6.80076	6.802	6.8034
1	4	5.55103	5.53293	5.51779	5.5109	5.50498	5.49993	5.4953	5.49096	5.48961	5.48848	5.4878	5.48839	5.48987	5.50127	5.51531	5.53621	5.55809	5.58157	5.60484	5.62798	5.65214	5.67603	5.69801	5.71623	5.72949	5.73957	5.74825	5.75923	5.77011	5.78028	5.79241	5.80662	5.82396	5.84235	5.86158	5.88015	5.89701	5.91166	5.92443	5.94182	5.96032	5.97852	5.99649	6.014	6.03123	6.04827	6.0648	6.08089
1	5	5.71369	5.71077	5.71104	5.72023	5.73471	5.75392	5.76487	5.77368	5.78329	5.7931	5.80331	5.81361	5.82397	5.82846	5.83154	5.83178	5.83283	5.83522	5.83721	5.83898	5.84062	5.84231	5.8443	5.84608	5.84758	5.84874	5.84975	5.85003	5.85035	5.85092	5.85118	5.85112	5.85015	5.8489	5.84913	5.84924	5.84906	5.84846	5.8475	5.84962	5.85338	5.86907	5.88919	5.91813	5.94844	5.97967	6.012	6.04468
1	6	5.71646	5.72876	5.74237	5.75967	5.77648	5.79285	5.80886	5.82465	5.83854	5.85129	5.86161	5.87051	5.87842	5.88223	5.88552	5.89054	5.89651	5.90408	5.91327	5.92338	5.93389	5.94462	5.95622	5.96828	5.98094	5.99218	6.00281	6.01268	6.02265	6.0331	6.04389	6.05504	6.06397	6.07213	6.07763	6.0831	6.08847	6.09319	6.09736	6.09702	6.09584	6.09809	6.10024	6.10219	6.10503	6.10847	6.11054	6.11257
1	7	5.40588	5.42091	5.43708	5.45642	5.476	5.49579	5.51508	5.53425	5.55361	5.57362	5.59502	5.61621	5.63726	5.65778	5.67806	5.6972	5.71609	5.73457	5.75414	5.77432	5.79127	5.80798	5.82526	5.84177	5.85724	5.87292	5.88871	5.90762	5.92674	5.94612	5.96178	5.97352	5.98513	5.99667	6.00619	6.01462	6.02021	6.02352	6.0249	6.02494	6.02467	6.02461	6.02494	6.02602	6.02697	6.02782	6.02748	6.02711
1	8	5.66931	5.6609	5.65503	5.65628	5.65602	5.65443	5.65475	5.65555	5.65605	5.65702	5.65903	5.66382	5.6706	5.68059	5.69139	5.70412	5.71703	5.73024	5.7447	5.75986	5.77468	5.7896	5.80525	5.82158	5.83883	5.86892	5.90466	5.9679	6.03086	6.08865	6.14407	6.19698	6.24908	6.30088	6.35046	6.38833	6.39573	6.40655	6.42027	6.43136	6.44169	6.45022	6.45758	6.46263	6.46704	6.47102	6.47508	6.47974
2	1	5.97256	5.98278	5.99302	6.00351	6.01458	6.02874	6.04237	6.0542	6.06669	6.08064	6.09435	6.10767	6.11937	6.1292	6.1388	6.14821	6.15827	6.16873	6.17678	6.18376	6.19398	6.20519	6.23547	6.26921	6.29649	6.32323	6.34913	6.375	6.40058	6.42583	6.44929	6.46675	6.46418	6.46318	6.46572	6.46752	6.46815	6.4682	6.46757	6.46289	6.45476	6.44642	6.43797	6.42827	6.41802	6.40923	6.40088	6.40382
2	2	5.39939	5.40854	5.41341	5.41992	5.42276	5.425	5.42866	5.4315	5.44024	5.45996	5.47581	5.4935	5.50691	5.51301	5.51118	5.51077	5.55758	5.61571	5.6773	5.73339	5.78888	5.79858	5.80061	5.79817	5.80183	5.80569	5.80732	5.80915	5.8122	5.81484	5.81565	5.81402	5.81606	5.81789	5.81687	5.82053	5.82154	5.82154	5.81809	5.81646	5.81402	5.81138	5.80976	5.80935	5.80813	5.80467	5.8065	5.80691
2	3	5.7937	5.79354	5.79337	5.79297	5.79255	5.79215	5.79176	5.79284	5.7944	5.79739	5.8011	5.80293	5.80341	5.8458	5.93008	6.0155	6.10253	6.18991	6.27801	6.36569	6.45213	6.53071	6.57003	6.60248	6.55937	6.51626	6.47051	6.42475	6.37792	6.33099	6.28391	6.23678	6.23585	6.25032	6.26763	6.28636	6.30215	6.31584	6.33122	6.34829	6.36618	6.3852	6.40129	6.41151	6.42273	6.43697	6.45191	6.47032
2	4	5.83193	5.82581	5.8197	5.81721	5.81608	5.81461	5.81273	5.81171	5.81458	5.81744	5.81932	5.82111	5.82489	5.82981	5.836	5.8444	5.85295	5.86288	5.8728	5.88368	5.89477	5.90732	5.9211	5.9348	5.9483	5.9618	5.96994	5.97808	5.98518	5.99188	5.99717	6.00075	6.00418	6.00695	6.00972	6.01071	6.01151	6.03836	6.0801	6.12455	6.17374	6.22327	6.27621	6.32915	6.38429	6.43992	6.49735	6.55628
2	5	5.81901	5.81918	5.8192	5.8098	5.80058	5.79649	5.7925	5.79087	5.78954	5.79282	5.79655	5.80556	5.8146	5.82382	5.833	5.84192	5.85032	5.85524	5.85989	5.86296	5.86609	5.86947	5.86979	5.85565	5.84243	5.83311	5.82377	5.81434	5.8049	5.79537	5.78589	5.77657	5.77128	5.77784	5.78403	5.78926	5.79597	5.80642	5.81709	5.82825	5.83887	5.84829	5.85761	5.86673	5.87499	5.88165	5.88666	5.88881
2	6	5.13768	5.14418	5.15069	5.16487	5.18673	5.20858	5.23549	5.26241	5.28903	5.31537	5.34171	5.36838	5.39505	5.42334	5.45326	5.48318	5.49555	5.50792	5.52028	5.53264	5.545	5.56093	5.57687	5.59296	5.60922	5.62548	5.64101	5.65654	5.67215	5.68784	5.70353	5.72343	5.74332	5.76091	5.7762	5.79148	5.80522	5.81896	5.83262	5.8462	5.85978	5.86788	5.87599	5.87961	5.87874	5.87786	5.87803	5.87819
2	7	5.56712	5.57671	5.5863	5.60343	5.62195	5.64083	5.65988	5.6765	5.69101	5.70553	5.72005	5.73382	5.74494	5.75599	5.76599	5.77599	5.78521	5.79436	5.80874	5.82478	5.86177	5.9125	5.96502	6.01972	6.07397	6.12716	6.17972	6.22829	6.27686	6.3169	6.35679	6.36578	6.36832	6.36783	6.36584	6.37672	6.3996	6.42334	6.44862	6.47553	6.50873	6.5419	6.57463	6.60735	6.63328	6.65842	6.67383	6.68585
2	8	5.89567	5.89639	5.8971	5.89756	5.89788	5.89405	5.8797	5.86536	5.85042	5.83542	5.82052	5.8057	5.79343	5.79092	5.78841	5.79001	5.79233	5.80351	5.82389	5.84484	5.86957	5.89431	5.91997	5.94591	5.9666	5.97988	5.99318	6.00662	6.02006	6.03303	6.04578	6.05471	6.05618	6.05766	6.05583	6.05393	6.0523	6.05084	6.04849	6.04366	6.03883	6.03152	6.02395	6.02042	6.02024	6.02015	6.0205	6.02084
3	1	6.13447	6.12375	6.11303	6.10231	6.08725	6.06954	6.05099	6.03258	6.01476	5.99707	5.97948	5.96248	5.94563	5.92907	5.91312	5.89783	5.88338	5.86918	5.85517	5.84129	5.82757	5.81723	5.80854	5.80952	5.81298	5.821	5.84764	5.8838	5.92006	5.95667	5.99414	6.0316	6.06906	6.11419	6.16018	6.20636	6.25204	6.29727	6.34237	6.38748	6.43283	6.47822	6.52366	6.55409	6.57911	6.59354	6.60881	6.62538
3	2	6.16916	6.17037	6.17163	6.17299	6.17395	6.17467	6.17501	6.17527	6.1754	6.17544	6.17542	6.17507	6.1739	6.1691	6.16789	6.17045	6.17176	6.17271	6.17329	6.17395	6.17474	6.1772	6.18048	6.18881	6.1953	6.19842	6.20562	6.21489	6.2218	6.22895	6.23683	6.24383	6.25023	6.25273	6.25399	6.25225	6.25021	6.24792	6.24005	6.23076	6.21953	6.20809	6.19639	6.18586	6.17564	6.165	6.15405	6.1426
3	3	6.11689	6.12113	6.12552	6.13025	6.13545	6.14093	6.1488	6.15707	6.16602	6.17553	6.18548	6.19726	6.2096	6.22329	6.23701	6.25077	6.26398	6.27689	6.28864	6.29934	6.30859	6.31709	6.32527	6.33245	6.33961	6.34671	6.35376	6.36079	6.36829	6.37571	6.3829	6.38959	6.39595	6.40287	6.40989	6.41703	6.42352	6.42943	6.4339	6.43781	6.44013	6.44125	6.44097	6.44045	6.43987	6.4395	6.43874	6.43739
3	4	6.10412	6.03334	5.96859	5.91722	5.88773	5.87156	5.84381	5.81431	5.78198	5.75967	5.74543	5.73097	5.71641	5.70156	5.68751	5.6743	5.66137	5.6484	5.63465	5.6234	5.61564	5.61245	5.6115	5.62329	5.636	5.65042	5.66532	5.68047	5.70106	5.72307	5.7483	5.77408	5.80023	5.8266	5.85308	5.87986	5.90245	5.92128	5.93607	5.95005	5.96388	5.97596	5.98596	5.99008	5.99498	6.02861	6.06771	6.1153
3	5	5.5944	5.59841	5.60269	5.60759	5.61138	5.61451	5.61641	5.61801	5.61897	5.61993	5.62089	5.62092	5.62099	5.62195	5.62303	5.62423	5.62515	5.62616	5.62857	5.63339	5.64158	5.64949	5.6573	5.66476	5.671	5.67497	5.67742	5.67911	5.67459	5.66928	5.66242	5.65177	5.63854	5.62748	5.61683	5.60684	5.59622	5.58503	5.57767	5.57195	5.57135	5.57152	5.5726	5.57434	5.57624	5.57793	5.58003	5.5828
3	6	5.90058	5.90242	5.90462	5.90766	5.91125	5.91519	5.91924	5.92834	5.95312	5.98282	6.0165	6.05264	6.08902	6.12473	6.16015	6.19528	6.23003	6.26486	6.30122	6.3311	6.35199	6.36543	6.37603	6.38449	6.39388	6.405	6.41729	6.43018	6.44484	6.45958	6.47437	6.48755	6.49964	6.50935	6.51899	6.52931	6.5448	6.56494	6.58961	6.61525	6.64146	6.66868	6.69707	6.72652	6.75639	6.78751	6.81929	6.8521
3	7	6.2464	6.26499	6.28267	6.29831	6.31203	6.32459	6.33674	6.34904	6.3619	6.37523	6.38893	6.40165	6.41402	6.42557	6.43653	6.44689	6.4585	6.47044	6.48247	6.4945	6.50653	6.5183	6.53001	6.54274	6.55605	6.57039	6.58568	6.60145	6.61531	6.62815	6.63859	6.65148	6.66604	6.6797	6.69267	6.7035	6.7143	6.72507	6.7362	6.74752	6.75955	6.77232	6.78595	6.80148	6.81795	6.8385	6.85817	6.87645
3	8	6.50366	6.50853	6.51354	6.5189	6.52698	6.5367	6.54587	6.55445	6.5613	6.56802	6.57463	6.58079	6.58693	6.5933	6.59988	6.60666	6.61425	6.62215	6.6309	6.63862	6.64492	6.65009	6.65492	6.66168	6.66872	6.67627	6.68302	6.68937	6.69546	6.70168	6.70824	6.71479	6.72132	6.7259	6.73032	6.73485	6.73997	6.74562	6.75131	6.75704	6.76294	6.76865	6.77415	6.77903	6.78373	6.78862	6.79361	6.79874
4	1	6.47508	6.48543	6.49578	6.5017	6.50559	6.50797	6.50778	6.50747	6.50525	6.50303	6.49976	6.49612	6.49156	6.48576	6.47971	6.47163	6.46355	6.46344	6.46537	6.46752	6.46991	6.47275	6.47788	6.483	6.48971	6.49669	6.50786	6.52265	6.54224	6.57861	6.61498	6.64943	6.68369	6.71819	6.75286	6.78677	6.81871	6.85065	6.88157	6.91245	6.93557	6.95448	6.96723	6.96767	6.96812	6.96878	6.96945	6.96996
4	2	6.58257	6.5911	6.59964	6.61394	6.63088	6.64771	6.66433	6.68091	6.69682	6.71272	6.73006	6.7479	6.76671	6.78683	6.80696	6.82708	6.8472	6.86592	6.88429	6.90276	6.92135	6.9401	6.95971	6.97932	7.00523	7.03223	7.07323	7.12629	7.17859	7.2282	7.27781	7.32418	7.37021	7.41565	7.46066	7.50504	7.54777	7.59051	7.62312	7.65534	7.66885	7.6722	7.67531	7.67795	7.68057	7.68244	7.68431	7.68562
4	3	6.28902	6.28777	6.28652	6.28728	6.28896	6.29093	6.29339	6.29596	6.30049	6.30502	6.31203	6.3199	6.32925	6.34058	6.35221	6.36626	6.38031	6.39583	6.41173	6.42787	6.44428	6.46112	6.48015	6.49917	6.51645	6.53342	6.54891	6.56314	6.57661	6.58745	6.59829	6.60533	6.61199	6.6174	6.62196	6.62575	6.62759	6.62942	6.6357	6.64215	6.65259	6.66521	6.67852	6.69322	6.70798	6.72575	6.74351	6.76333
4	4	6.62897	6.62775	6.62654	6.63357	6.64439	6.65386	6.66105	6.66849	6.68017	6.69184	6.70111	6.70954	6.71835	6.72765	6.73686	6.74529	6.75372	6.7632	6.77295	6.78181	6.78971	6.79782	6.80695	6.81608	6.82342	6.83044	6.83685	6.84273	6.84817	6.85203	6.8559	6.86103	6.8663	6.87136	6.87628	6.88027	6.88185	6.88343	6.88662	6.88987	6.89385	6.89824	6.90152	6.90258	6.9036	6.90307	6.90255	6.90313
4	5	6.17276	6.17921	6.18566	6.19014	6.19373	6.19662	6.19832	6.20001	6.2014	6.2028	6.20463	6.20662	6.20899	6.21187	6.21484	6.21852	6.22221	6.22472	6.22694	6.228	6.2278	6.22755	6.227	6.22646	6.2273	6.22837	6.22753	6.22504	6.22248	6.21965	6.21683	6.21439	6.212	6.2111	6.21122	6.21147	6.21204	6.2126	6.2136	6.21462	6.21596	6.21748	6.2189	6.2201	6.22133	6.22394	6.22655	6.22996
4	6	5.57853	5.60918	5.63983	5.66835	5.6959	5.72292	5.74906	5.77531	5.80328	5.83124	5.86024	5.8896	5.91839	5.94639	5.97418	6.0002	6.02622	6.05127	6.07606	6.10139	6.12728	6.15315	6.17893	6.20471	6.22932	6.25374	6.27655	6.29798	6.31918	6.33957	6.35997	6.37958	6.39912	6.41805	6.43657	6.45464	6.47155	6.48845	6.50372	6.51893	6.53287	6.54612	6.56005	6.57533	6.59059	6.60455	6.6185	6.63165
5	1	6.1002	6.10191	6.10362	6.10546	6.10737	6.10964	6.11203	6.11483	6.11781	6.12118	6.12473	6.12858	6.13252	6.13655	6.14105	6.14596	6.15124	6.15674	6.16368	6.17127	6.18006	6.18921	6.19994	6.21095	6.22305	6.23524	6.24794	6.26057	6.27241	6.28419	6.29567	6.30682	6.31693	6.32669	6.33565	6.34403	6.35149	6.36561	6.38748	6.41308	6.44188	6.46813	6.4928	6.51727	6.54166	6.56635	6.59114	6.61592
5	2	6.5382	6.48011	6.42289	6.37613	6.33364	6.31467	6.29482	6.27203	6.24838	6.2228	6.20145	6.18687	6.17301	6.15997	6.14657	6.13285	6.12144	6.11147	6.1047	6.09935	6.09592	6.09305	6.09103	6.08916	6.09096	6.09306	6.09592	6.09891	6.10342	6.10834	6.1155	6.12307	6.13197	6.13885	6.14119	6.14331	6.14507	6.14718	6.14971	6.15179	6.15347	6.15458	6.15532	6.1643	6.17694	6.19263	6.20925	6.2301
5	3	5.65551	5.65602	5.65656	5.6574	5.65837	5.66002	5.66162	5.66306	5.66446	5.66576	5.66795	5.67155	5.67548	5.6798	5.68515	5.69139	5.69772	5.7041	5.71059	5.71714	5.72425	5.73153	5.73898	5.74646	5.75194	5.75725	5.76179	5.76619	5.76903	5.77078	5.76653	5.76122	5.75234	5.74424	5.73789	5.73154	5.7252	5.71828	5.71068	5.70372	5.69732	5.69175	5.68668	5.68151	5.67631	5.67157	5.66698	5.67242
5	4	6.09772	6.10582	6.11423	6.12639	6.13855	6.15067	6.16193	6.17026	6.17803	6.18457	6.1912	6.19801	6.20394	6.20882	6.21209	6.21398	6.22367	6.23824	6.25407	6.27047	6.287	6.30357	6.31944	6.33517	6.35146	6.36779	6.38337	6.39811	6.40299	6.40559	6.39568	6.38658	6.3802	6.3739	6.36777	6.36266	6.3592	6.35761	6.35818	6.3615	6.36715	6.37884	6.3943	6.41159	6.42968	6.44764	6.46555	6.48388
5	5	5.74268	5.76137	5.77926	5.78737	5.79532	5.80239	5.80819	5.80972	5.81115	5.81232	5.81346	5.81454	5.81598	5.81785	5.82217	5.82859	5.83656	5.8455	5.85476	5.86416	5.87529	5.88695	5.90054	5.91448	5.92631	5.93796	5.94589	5.95375	5.96087	5.96757	5.97201	5.97567	5.97675	5.97733	5.97676	5.976	5.97493	5.97469	5.97544	5.9777	5.98124	5.98515	5.98929	5.99658	6.00527	6.01966	6.03575	6.05086
5	6	5.57085	5.5675	5.56399	5.55848	5.55239	5.54309	5.53411	5.52618	5.5189	5.51309	5.50724	5.50132	5.50217	5.51092	5.52076	5.53154	5.5433	5.55566	5.56722	5.57843	5.59239	5.60719	5.62181	5.63639	5.65459	5.67309	5.69496	5.71742	5.7468	5.77516	5.79788	5.82065	5.84359	5.86698	5.89139	5.91524	5.93817	5.95969	5.97956	6.00012	6.02126	6.04038	6.05824	6.07471	6.09056	6.1065	6.12246	6.14012
6	1	6.50561	6.52286	6.54011	6.55568	6.57075	6.58459	6.59737	6.60964	6.62076	6.63179	6.64172	6.65166	6.66048	6.66908	6.67851	6.68848	6.698	6.70678	6.71531	6.72241	6.72951	6.735	6.74033	6.7453	6.75011	6.75468	6.75895	6.76328	6.76782	6.77236	6.77891	6.7855	6.79457	6.80447	6.81459	6.82493	6.83531	6.84581	6.85631	6.86696	6.87761	6.88888	6.90028	6.91108	6.92146	6.93097	6.93891	6.94588
6	2	6.26324	6.25201	6.24078	6.2347	6.23018	6.22661	6.22388	6.22181	6.22127	6.22107	6.22544	6.22981	6.23823	6.24743	6.25718	6.26729	6.27722	6.28688	6.29681	6.30847	6.32012	6.33418	6.34848	6.35993	6.37004	6.37974	6.38894	6.39829	6.40822	6.41814	6.44229	6.46669	6.48495	6.50116	6.51812	6.53579	6.55382	6.57276	6.59169	6.61054	6.62939	6.63978	6.64834	6.65813	6.66879	6.67986	6.6917	6.70478
6	3	6.1982	6.19922	6.20025	6.2019	6.20375	6.20566	6.20764	6.20946	6.21089	6.21228	6.21303	6.21378	6.21449	6.2152	6.21574	6.21617	6.21642	6.21635	6.21622	6.21574	6.21526	6.21479	6.21431	6.21405	6.21389	6.21401	6.21449	6.21504	6.21586	6.21668	6.2171	6.21751	6.218	6.21853	6.21938	6.22054	6.22209	6.22462	6.22715	6.22972	6.23229	6.23578	6.23947	6.24445	6.25032	6.25661	6.26364	6.27076
6	4	6.30643	6.31193	6.31743	6.32506	6.33333	6.34267	6.35292	6.36284	6.37197	6.38125	6.39254	6.40382	6.41566	6.42761	6.43904	6.45013	6.46547	6.48785	6.51067	6.53601	6.56136	6.58742	6.61354	6.63963	6.6657	6.69162	6.71735	6.74306	6.76866	6.79425	6.8218	6.84939	6.87045	6.88933	6.90595	6.92044	6.93547	6.95183	6.96821	6.98481	7.00141	7.01909	7.03699	7.05634	7.0767	7.09622	7.11424	7.13227
7	1	6.36845	6.38662	6.40467	6.42027	6.4357	6.44944	6.46318	6.47693	6.49058	6.50374	6.51687	6.52984	6.54283	6.55585	6.56839	6.57991	6.59096	6.60121	6.61099	6.62011	6.63048	6.64226	6.65319	6.66334	6.6727	6.68145	6.68923	6.69641	6.70384	6.71141	6.71949	6.7278	6.73696	6.7464	6.75072	6.75374	6.75801	6.76252	6.76858	6.77483	6.77995	6.785	6.78947	6.79392	6.79782	6.80166	6.80473	6.80758
7	2	6.40549	6.41053	6.41579	6.42544	6.4351	6.4448	6.4554	6.47145	6.48765	6.50445	6.52086	6.53598	6.55022	6.5622	6.57291	6.58101	6.5892	6.59754	6.6071	6.61833	6.63085	6.64484	6.66143	6.68047	6.70099	6.72265	6.74507	6.76799	6.78464	6.79801	6.81159	6.82524	6.83832	6.8512	6.86262	6.87368	6.88891	6.90491	6.9207	6.93646	6.95099	6.96542	6.98031	6.99522	7.01054	7.02586	7.04128	7.05656
7	3	6.58333	6.6012	6.61904	6.63635	6.65345	6.66854	6.68344	6.69717	6.71066	6.72304	6.73584	6.74999	6.764	6.77763	6.79082	6.8031	6.81631	6.83109	6.84905	6.87138	6.89412	6.91733	6.94016	6.96264	6.98564	7.00906	7.03133	7.05287	7.07158	7.08879	7.10166	7.11269	7.0854	7.04533	7.02903	7.01878	7.00503	6.99062	6.97371	6.9565	6.93782	6.91904	6.94923	6.9802	7.01117	7.04214	7.07311	7.10408
7	4	6.82353	6.83202	6.8398	6.83309	6.82689	6.82557	6.82432	6.82362	6.82221	6.81771	6.81468	6.81646	6.8211	6.83304	6.84478	6.85609	6.86805	6.88109	6.87764	6.85161	6.80762	6.74326	6.67741	6.61014	6.54229	6.47398	6.40587	6.3379	6.2667	6.19383	6.15616	6.13336	6.13733	6.15023	6.1634	6.17662	6.18945	6.2022	6.21337	6.22435	6.23946	6.25485	6.27145	6.28805	6.30377	6.31951	6.33553	6.35205
8	1	5.34101	5.34412	5.34724	5.35306	5.35912	5.3661	5.37326	5.38096	5.38885	5.39378	5.39723	5.38863	5.37142	5.35152	5.32892	5.30624	5.28344	5.26015	5.23589	5.21145	5.18644	5.16241	5.1433	5.12606	5.12937	5.13267	5.14267	5.15267	5.16303	5.17342	5.18422	5.19509	5.20688	5.21896	5.2315	5.24428	5.2554	5.26531	5.27556	5.28613	5.29686	5.30782	5.31899	5.33058	5.34238	5.35479	5.36743	5.38127
8	2	6.04838	6.06857	6.08877	6.11183	6.13514	6.15918	6.18337	6.20845	6.23382	6.25779	6.28106	6.30308	6.3242	6.34708	6.37173	6.39676	6.42234	6.44061	6.44425	6.44744	6.44928	6.45048	6.44846	6.44628	6.44231	6.43834	6.42463	6.41092	6.4045	6.39873	6.39752	6.39723	6.39799	6.39911	6.40117	6.40372	6.40574	6.40739	6.40828	6.40841	6.40983	6.41308	6.41662	6.42075	6.42501	6.42969	6.43527	6.44541
8	3	6.05567	6.0634	6.07114	6.08529	6.10002	6.10958	6.1181	6.11205	6.10114	6.0916	6.08275	6.07952	6.08032	6.08325	6.08832	6.09292	6.09687	6.10082	6.10477	6.11375	6.13781	6.16279	6.19233	6.22112	6.24152	6.26192	6.26384	6.26575	6.26453	6.26302	6.2564	6.24876	6.23449	6.21801	6.19477	6.16813	6.145	6.12438	6.10552	6.08843	6.07178	6.05576	6.04	6.02478	6.01131	6.00308	5.99573	5.99282
8	4	5.99593	6.01138	6.02683	6.04383	6.06096	6.07634	6.09137	6.10668	6.1221	6.13367	6.14333	6.15151	6.15863	6.16654	6.17522	6.18289	6.18913	6.1955	6.20214	6.21016	6.22236	6.23553	6.25358	6.27189	6.29316	6.31443	6.28935	6.26426	6.23329	6.20177	6.16847	6.13481	6.09772	6.05947	6.02292	5.98721	5.98236	5.99954	6.01818	6.03828	6.06171	6.0898	6.13706	6.22265	6.30578	6.38159	6.45751	6.534
8	5	5.97358	5.97829	5.98301	5.99131	5.99994	5.96763	5.92714	5.88314	5.83798	5.80857	5.78704	5.76654	5.74678	5.72588	5.70382	5.69758	5.71347	5.73343	5.76155	5.78481	5.79354	5.80081	5.80081	5.80081	5.80081	5.80081	5.80905	5.81729	5.83086	5.84492	5.85898	5.87303	5.88709	5.90115	5.91521	5.92926	5.93993	5.94817	5.95762	5.96828	5.98622	6.01433	6.04245	6.07056	6.09577	6.11225	6.12364	6.10958
9	1	5.93699	5.95077	5.96455	5.97746	5.99025	6.00255	6.0147	6.02744	6.04051	6.05355	6.06657	6.07923	6.09135	6.10269	6.11209	6.12171	6.13239	6.14306	6.15335	6.16365	6.1728	6.18186	6.18907	6.19585	6.20278	6.20977	6.21698	6.22436	6.23157	6.23857	6.24561	6.25273	6.25979	6.26664	6.27331	6.27845	6.28358	6.28804	6.29249	6.29619	6.29976	6.30221	6.30428	6.30613	6.30786	6.30938	6.31072	6.31187
9	2	5.65346	5.677	5.70054	5.72184	5.74284	5.76251	5.78176	5.79993	5.8175	5.83395	5.84941	5.86381	5.87669	5.88918	5.90073	5.91233	5.92424	5.93604	5.94604	5.95604	5.96295	5.96964	5.97685	5.98419	5.98883	5.99229	6.00796	6.03261	6.06064	6.09266	6.12435	6.15537	6.18679	6.21959	6.25246	6.28602	6.31958	6.35442	6.38928	6.40247	6.41227	6.40785	6.39858	6.3904	6.38287	6.37686	6.37234	6.36648
9	3	6.32215	6.30389	6.28563	6.2657	6.24555	6.22735	6.20975	6.19481	6.18134	6.1674	6.15303	6.14326	6.14019	6.13825	6.13913	6.14033	6.14309	6.14588	6.14905	6.15222	6.1442	6.13537	6.12942	6.12413	6.1211	6.11908	6.11842	6.11875	6.119	6.11915	6.11962	6.1207	6.12421	6.1363	6.14884	6.16541	6.18199	6.1932	6.20432	6.21067	6.21628	6.22686	6.23913	6.25233	6.26608	6.27918	6.29165	6.30314
9	4	6.02947	6.02362	6.01776	6.02085	6.02514	6.03035	6.03585	6.04451	6.05492	6.06563	6.07659	6.0869	6.09623	6.10546	6.11442	6.12319	6.13104	6.13867	6.14236	6.14604	6.14672	6.14717	6.14968	6.15267	6.15413	6.15492	6.1572	6.16057	6.16429	6.16842	6.17326	6.17951	6.18545	6.19036	6.19529	6.20038	6.20547	6.21059	6.2157	6.22034	6.2249	6.23177	6.23942	6.25102	6.26496	6.27992	6.29587	6.3155
9	5	6.2212	6.22184	6.22248	6.23265	6.2441	6.25428	6.26406	6.27261	6.28048	6.2889	6.29782	6.30744	6.31809	6.32921	6.34149	6.35418	6.36886	6.38394	6.40658	6.42922	6.449	6.46857	6.48603	6.50301	6.52039	6.53795	6.55274	6.5655	6.57787	6.58976	6.60371	6.62165	6.63973	6.65835	6.67626	6.68806	6.69986	6.71327	6.7267	6.74618	6.76662	6.78383	6.79995	6.81709	6.83484	6.85454	6.87612	6.89935
10	1	5.82039	5.8261	5.83181	5.83575	5.83888	5.84151	5.84326	5.84506	5.8476	5.85013	5.85239	5.85455	5.85635	5.85765	5.85886	5.85933	5.8598	5.86111	5.86263	5.8633	5.86307	5.86277	5.86212	5.86148	5.86155	5.86174	5.86067	5.85852	5.85642	5.85452	5.85262	5.85479	5.85739	5.8734	5.89863	5.92252	5.94292	5.96332	5.98146	5.99951	6.01664	6.03325	6.05096	6.07087	6.09076	6.11004	6.12932	6.1438
10	2	5.50813	5.52356	5.53899	5.55427	5.56948	5.58458	5.59948	5.61435	5.62868	5.64301	5.65722	5.67139	5.68518	5.69844	5.71158	5.72369	5.73581	5.74676	5.75742	5.7687	5.78067	5.79289	5.80632	5.81976	5.83487	5.85028	5.86437	5.87733	5.89009	5.90223	5.91436	5.92596	5.9375	5.94886	5.96008	5.97054	5.97898	5.98742	5.99483	6.0022	6.00931	6.01628	6.02366	6.03184	6.04003	6.04844	6.05686	6.06499
10	3	5.68089	5.68883	5.69676	5.70801	5.72077	5.73386	5.74753	5.7612	5.77509	5.78897	5.80347	5.81818	5.83335	5.84912	5.86493	5.88096	5.897	5.91229	5.92738	5.94205	5.95625	5.97044	5.98457	5.9987	6.01044	6.02177	6.03149	6.03985	6.04801	6.0555	6.06299	6.07158	6.08028	6.08977	6.0998	6.11044	6.12268	6.13491	6.15264	6.17058	6.18707	6.20275	6.21914	6.23694	6.25472	6.27155	6.28839	6.30559
10	4	5.41565	5.41641	5.41717	5.41783	5.41845	5.4193	5.42056	5.42191	5.42484	5.42776	5.43133	5.43512	5.43825	5.44049	5.44267	5.44441	5.44615	5.44925	5.4527	5.45502	5.45612	5.45715	5.45774	5.45834	5.46126	5.46459	5.47422	5.4893	5.50522	5.52406	5.54291	5.56177	5.58063	5.59902	5.61709	5.63492	5.65216	5.66939	5.68613	5.70284	5.71527	5.72536	5.73269	5.73451	5.73628	5.73504	5.7338	5.73315
10	5	5.26728	5.27896	5.29065	5.30011	5.30855	5.3172	5.32621	5.33533	5.34657	5.3578	5.36811	5.3781	5.39393	5.41762	5.44314	5.4833	5.52345	5.56414	5.60497	5.64555	5.68586	5.72647	5.76859	5.8107	5.85325	5.89588	5.92502	5.94253	5.96027	5.97878	5.9973	6.01751	6.03791	6.05814	6.07826	6.09942	6.12326	6.1471	6.17268	6.19832	6.22204	6.24471	6.26694	6.28829	6.30969	6.33372	6.35775	6.3776
10	6	5.42378	5.42256	5.42134	5.42202	5.42357	5.43152	5.45035	5.46946	5.49305	5.51664	5.5405	5.56445	5.58824	5.6118	5.63536	5.65895	5.68254	5.6994	5.71454	5.72687	5.73618	5.74685	5.76431	5.78177	5.79736	5.81263	5.82927	5.8471	5.86442	5.87997	5.89553	5.90988	5.92411	5.93026	5.93086	5.93258	5.93724	5.94189	5.94722	5.95257	5.96546	5.98245	6.00134	6.02401	6.04672	6.07124	6.09576	6.12129
10	7	5.68089	5.64226	5.60363	5.61291	5.64422	5.67176	5.69293	5.71337	5.72158	5.7298	5.74611	5.76525	5.78039	5.79013	5.79408	5.75158	5.70909	5.67072	5.6334	5.60431	5.58406	5.56311	5.53861	5.51412	5.48775	5.46106	5.45607	5.46981	5.47865	5.4704	5.46215	5.457	5.45217	5.44765	5.44335	5.43937	5.4362	5.43304	5.4161	5.39863	5.39254	5.39262	5.39221	5.39081	5.38949	5.39265	5.39581	5.39866
11	1	5.02541	4.99587	4.96634	4.95372	4.95499	4.95771	4.97375	4.98978	4.99777	5.00138	5.00696	5.02059	5.03421	5.04741	5.06045	5.07244	5.0819	5.09137	5.09176	5.09047	5.08915	5.08779	5.08643	5.08514	5.08387	5.08268	5.0816	5.0805	5.07889	5.07728	5.07895	5.08293	5.08736	5.09465	5.10194	5.10799	5.11346	5.11913	5.12541	5.13169	5.13921	5.14708	5.15552	5.16515	5.17477	5.18525	5.19584	5.20516
11	2	5.3513	5.36494	5.37857	5.38806	5.39415	5.3998	5.40148	5.40316	5.40294	5.40168	5.39746	5.38109	5.36473	5.36243	5.36495	5.3658	5.36265	5.35951	5.35158	5.34277	5.35025	5.38298	5.41571	5.44192	5.46773	5.4886	5.50434	5.51992	5.53188	5.54384	5.5632	5.58775	5.6123	5.63685	5.6614	5.67212	5.67653	5.67793	5.6696	5.66127	5.65267	5.64399	5.64073	5.6483	5.65586	5.6638	5.6718	5.67987
11	3	5.68902	5.69038	5.69173	5.69554	5.70136	5.70755	5.71711	5.72667	5.7382	5.75082	5.76405	5.77977	5.79549	5.81627	5.83878	5.86078	5.88155	5.90232	5.91831	5.93342	5.94581	5.95399	5.96218	5.97036	5.97854	5.9824	5.98177	5.9807	5.96874	5.95678	5.93742	5.91287	5.8904	5.88095	5.87151	5.85602	5.83777	5.81804	5.79349	5.76894	5.74439	5.71985	5.6953	5.67075	5.6462	5.62665	5.60777	5.58998
11	4	5.26728	5.28041	5.29354	5.30167	5.30571	5.30997	5.31627	5.32257	5.32388	5.32247	5.32214	5.3262	5.33027	5.3334	5.33622	5.34014	5.34669	5.35324	5.35853	5.36359	5.36998	5.37844	5.3869	5.39419	5.4014	5.40972	5.41917	5.42866	5.43894	5.44922	5.46175	5.47585	5.49023	5.5064	5.52257	5.53993	5.55785	5.57554	5.59254	5.60954	5.62667	5.64384	5.6594	5.67176	5.68412	5.69728	5.71054	5.72353
12	1	6.65346	6.6956	6.73774	6.76997	6.7923	6.81463	6.84667	6.8787	6.90476	6.92484	6.94492	6.95955	6.97419	6.97375	6.95824	6.94273	6.92241	6.90208	6.87773	6.84936	6.82098	6.79407	6.76716	6.73937	6.71069	6.68201	6.69368	6.70534	6.71618	6.72618	6.73618	6.74439	6.7526	6.76109	6.76987	6.77865	6.79018	6.8017	6.80747	6.80747	6.80747	6.80787	6.80828	6.8082	6.80763	6.80706	6.80804	6.80901
12	2	6.14448	6.16403	6.18358	6.20408	6.22551	6.24695	6.26816	6.28938	6.3072	6.32163	6.33605	6.31996	6.30387	6.28373	6.25954	6.23535	6.21155	6.18776	6.16371	6.1394	6.1151	6.08685	6.05861	6.02479	5.98539	5.946	5.92913	5.91226	5.90557	5.90907	5.91257	5.93077	5.94897	5.96717	5.98537	6.00357	6.01852	6.03346	6.05131	6.07206	6.09282	6.11737	6.14193	6.1658	6.18898	6.21216	6.21216	6.21216
12	3	5.36382	5.37993	5.39604	5.41178	5.42715	5.44251	5.45769	5.47287	5.48821	5.50371	5.5192	5.53597	5.55273	5.57202	5.59382	5.61562	5.64079	5.66596	5.69185	5.71848	5.74511	5.77487	5.80462	5.8359	5.86868	5.90146	5.93421	5.96696	6	6.03333	6.06667	6.09646	6.12625	6.15368	6.17875	6.20382	6.22342	6.24302	6.25969	6.27343	6.28716	6.2943	6.30143	6.30489	6.30467	6.30445	6.29855	6.29266
12	4	5.73752	5.79507	5.85263	5.89525	5.92294	5.95063	5.97155	5.99247	6.02451	6.06768	6.11085	6.15401	6.19718	6.23521	6.26811	6.30101	6.33111	6.36121	6.39784	6.44101	6.48417	6.52734	6.5705	6.602	6.62184	6.64167	6.64004	6.6384	6.63327	6.62464	6.616	6.60737	6.59874	6.5901	6.58147	6.57284	6.5642	6.55557	6.54694	6.53831	6.52967	6.54134	6.55301	6.56747	6.58474	6.602	6.61927	6.63654
12	5	5.93923	5.92485	5.91046	5.9166	5.94328	5.96996	6.0146	6.05924	6.09883	6.13336	6.1679	6.21876	6.26963	6.31583	6.35736	6.39889	6.42713	6.45536	6.47379	6.48243	6.49106	6.50739	6.52372	6.54052	6.55779	6.57506	6.59069	6.60632	6.61846	6.62709	6.63572	6.64436	6.65299	6.66372	6.67656	6.68939	6.70432	6.71926	6.72672	6.72672	6.72672	6.71996	6.71319	6.70736	6.70246	6.69756	6.69826	6.69896
12	6	6.26626	6.30137	6.33648	6.36997	6.40184	6.43371	6.46611	6.49851	6.53111	6.56392	6.59672	6.62785	6.65897	6.6891	6.71823	6.74737	6.77475	6.80214	6.83096	6.86121	6.89146	6.91813	6.9448	6.96801	6.98777	7.00753	7.02367	7.03982	7.05337	7.06432	7.07526	7.08652	7.09778	7.10813	7.11758	7.12703	7.13548	7.14394	7.1527	7.16177	7.17083	7.17995	7.18907	7.19828	7.20759	7.2169	7.22269	7.22848
13	1	4.88821	4.90278	4.91734	4.93079	4.94284	4.9549	4.97037	4.98622	5.00264	5.02012	5.0376	5.05815	5.0795	5.10268	5.13154	5.1604	5.19251	5.22605	5.25854	5.28476	5.31098	5.3372	5.36341	5.38963	5.41585	5.44207	5.46829	5.49451	5.52073	5.54199	5.56293	5.5841	5.60564	5.62719	5.65264	5.67886	5.70555	5.73339	5.76124	5.79371	5.82786	5.85894	5.87642	5.8939	5.92141	5.95475	5.98821	6.02317
13	2	5.50203	5.52772	5.5534	5.57339	5.58638	5.59938	5.61281	5.62628	5.6416	5.66037	5.67914	5.69841	5.71782	5.73775	5.75932	5.78089	5.80467	5.82944	5.8543	5.87971	5.90513	5.92972	5.95375	5.97767	5.99898	6.02028	6.03779	6.05134	6.06488	6.07429	6.08342	6.09137	6.09745	6.10354	6.10872	6.11373	6.11948	6.12709	6.1347	6.14089	6.14657	6.15557	6.17935	6.20313	6.23374	6.26832	6.3031	6.34018
13	3	5.31098	5.34146	5.37195	5.39994	5.42488	5.44981	5.50352	5.5605	5.61294	5.65684	5.70074	5.73882	5.77541	5.81448	5.86123	5.90798	5.96037	6.01524	6.06815	6.1092	6.15026	6.18097	6.20455	6.22873	6.26715	6.30556	6.34557	6.38724	6.4289	6.44042	6.44998	6.46646	6.4939	6.52134	6.54878	6.57622	6.60587	6.64103	6.67619	6.70224	6.72501	6.74807	6.77246	6.79685	6.81314	6.82473	6.83464	6.82569
13	4	6.35671	6.36746	6.37822	6.38386	6.38322	6.38259	6.38688	6.39174	6.39696	6.40286	6.40876	6.41161	6.41368	6.41524	6.41524	6.41524	6.41425	6.41281	6.41188	6.41395	6.41602	6.41668	6.41636	6.41603	6.41548	6.41492	6.41897	6.42781	6.43665	6.44273	6.44863	6.4531	6.45533	6.45756	6.46099	6.46466	6.47005	6.47977	6.48949	6.49635	6.50216	6.50796	6.5137	6.51944	6.52286	6.52493	6.52762	6.53726
14	1	6.27337	6.2774	6.28203	6.29403	6.30483	6.30907	6.31155	6.30822	6.30564	6.30476	6.30668	6.31306	6.31606	6.31511	6.31534	6.31659	6.32111	6.32768	6.3376	6.34901	6.36026	6.37146	6.37221	6.37105	6.37138	6.37184	6.37283	6.37388	6.37566	6.37785	6.38233	6.38749	6.39491	6.40384	6.41618	6.42892	6.44227	6.4554	6.46827	6.47951	6.48936	6.49151	6.48885	6.48982	6.49241	6.48741	6.48015	6.46846
14	2	5.89549	5.84852	5.80404	5.78938	5.77656	5.77392	5.7719	5.7719	5.77	5.76382	5.75783	5.75214	5.75558	5.76967	5.78363	5.79747	5.80279	5.80279	5.81523	5.83318	5.86543	5.90196	5.92912	5.95458	5.96955	5.98364	5.99773	6.01173	6.0247	6.03697	6.0454	6.05838	6.08656	6.11086	6.12644	6.14553	6.17025	6.19257	6.2121	6.23229	6.25305	6.2726	6.29139	6.29905	6.30177	6.31262	6.32591	6.32708
14	3	5.5315	5.57522	5.618	5.64945	5.68043	5.70886	5.73829	5.77106	5.79598	5.80325	5.81159	5.82163	5.8302	5.83707	5.84172	5.84447	5.84514	5.8445	5.84387	5.84324	5.84463	5.84664	5.85169	5.85729	5.86855	5.88028	5.89603	5.9122	5.93345	5.95459	5.9752	5.99681	6.02176	6.04576	6.06763	6.09085	6.11622	6.14012	6.16232	6.18685	6.21337	6.23802	6.26148	6.28816	6.31628	6.33967	6.36166	6.38346
15	1	5.39228	5.39566	5.39786	5.39829	5.39817	5.39821	5.39948	5.4103	5.42776	5.44251	5.45698	5.47106	5.48632	5.50222	5.51947	5.53103	5.53843	5.5511	5.56363	5.57567	5.5887	5.6014	5.61104	5.61782	5.62239	5.62463	5.6267	5.6286	5.62983	5.63069	5.63069	5.63111	5.63187	5.63408	5.63965	5.65145	5.66739	5.6855	5.70808	5.73168	5.75615	5.78277	5.8089	5.83375	5.8575	5.88105	5.90603	5.93082
15	2	5.69676	5.69831	5.69982	5.70125	5.7026	5.70424	5.7072	5.70964	5.71171	5.7129	5.71522	5.71937	5.72602	5.73396	5.74452	5.75334	5.76086	5.76913	5.7777	5.78675	5.79748	5.80906	5.82229	5.83665	5.85187	5.8605	5.86892	5.87741	5.88601	5.8947	5.90374	5.91342	5.92361	5.93488	5.94516	5.95344	5.96145	5.9693	5.97682	5.98453	5.99239	5.99899	6.00505	6.01021	6.01388	6.01707	6.02062	6.02439
15	3	6.05181	6.04424	6.03786	6.03328	6.03215	6.03211	6.03291	6.03455	6.03677	6.04301	6.04942	6.05602	6.06288	6.0705	6.08125	6.09257	6.10429	6.11717	6.12972	6.14167	6.15298	6.16378	6.17302	6.18335	6.19453	6.20661	6.21875	6.23094	6.24216	6.25285	6.26242	6.27249	6.28298	6.29327	6.3033	6.31286	6.32944	6.34881	6.37052	6.38818	6.40236	6.41611	6.42969	6.44299	6.47139	6.50558	6.5414	6.57774
15	4	5.72764	5.71436	5.70125	5.68839	5.67594	5.66414	5.65458	5.64567	5.63721	5.63028	5.62365	5.61748	5.61187	5.60674	5.60317	5.60097	5.59979	5.59987	5.59976	5.59927	5.59982	5.60089	5.60301	5.60609	5.60992	5.61413	5.61854	5.62325	5.63096	5.63985	5.64992	5.66089	5.6726	5.6857	5.69928	5.71363	5.73037	5.74848	5.76994	5.7932	5.81801	5.85942	5.90313	5.94918	5.99799	6.04868	6.10515	6.15871
15	5	5.65562	5.65074	5.64856	5.65048	5.65354	5.6573	5.66284	5.67213	5.68403	5.69301	5.7016	5.70962	5.71898	5.72815	5.73478	5.74137	5.74793	5.76041	5.77384	5.78859	5.80136	5.81317	5.82312	5.83573	5.85041	5.86184	5.87236	5.88149	5.89233	5.90451	5.92103	5.93812	5.95568	5.9697	5.98335	5.99665	6.01264	6.02915	6.04318	6.05938	6.07744	6.0958	6.11477	6.1349	6.15606	6.17797	6.20246	6.22577
16	1	3.95427	3.96996	3.98566	4.00136	4.01724	4.03363	4.05004	4.0665	4.08459	4.10408	4.12405	4.14424	4.16641	4.18907	4.21264	4.23626	4.25992	4.28358	4.30725	4.33147	4.35672	4.38263	4.40927	4.43667	4.46454	4.49359	4.52304	4.54989	4.5763	4.59716	4.6178	4.63712	4.65514	4.66985	4.68463	4.69952	4.71495	4.73082	4.74653	4.76217	4.77492	4.78704	4.79917	4.81242	4.83723	4.86212	4.88733	4.91366
16	2	5.21545	5.2213	5.22628	5.22566	5.22337	5.21652	5.20895	5.20031	5.19199	5.18394	5.17605	5.16823	5.15557	5.14174	5.12642	5.11096	5.09498	5.08101	5.07473	5.0668	5.05574	5.04285	5.02797	5.01109	4.99294	4.97539	4.95803	4.941	4.92399	4.90573	4.88814	4.87432	4.86162	4.85176	4.84531	4.84363	4.84369	4.84517	4.84909	4.85413	4.86729	4.88222	4.90062	4.91941	4.94057	4.96252	4.98725	5.01263
16	3	5.29324	5.3276	5.36135	5.39108	5.41923	5.44309	5.46754	5.49287	5.51703	5.5402	5.5601	5.57839	5.59509	5.6114	5.62698	5.64247	5.65737	5.67214	5.68649	5.70066	5.7145	5.72741	5.7393	5.75044	5.7611	5.77097	5.78057	5.78975	5.79884	5.80639	5.81361	5.81899	5.81862	5.8037	5.78676	5.767	5.74525	5.7219	5.69944	5.67739	5.66039	5.6445	5.65249	5.66266	5.68377	5.70676	5.73631	5.77225
16	4	5.86687	5.85617	5.84547	5.83477	5.82533	5.8193	5.81449	5.81149	5.80842	5.80531	5.80193	5.79843	5.79492	5.79142	5.78974	5.78821	5.78707	5.78611	5.78579	5.78584	5.78662	5.78738	5.78813	5.78845	5.78849	5.78854	5.78858	5.78876	5.78895	5.78922	5.7895	5.78981	5.79014	5.79055	5.79096	5.79137	5.7917	5.79195	5.79219	5.79241	5.79238	5.79229	5.79185	5.79139	5.79086	5.79011	5.78861	5.78711
16	5	5.59575	5.60719	5.61819	5.62636	5.63473	5.64367	5.65317	5.66352	5.67071	5.67518	5.68367	5.69412	5.70362	5.71288	5.72122	5.72944	5.73696	5.74472	5.75344	5.76309	5.77453	5.78597	5.79741	5.81131	5.82678	5.84054	5.85373	5.86806	5.88252	5.89527	5.90803	5.92089	5.93356	5.94576	5.96019	5.97773	5.99635	6.01585	6.03289	6.04879	6.06926	6.09072	6.11269	6.13304	6.13681	6.14269	6.15585	6.16346
17	1	4.53732	4.57173	4.60614	4.63509	4.66239	4.69014	4.71828	4.74067	4.7499	4.75812	4.75332	4.74852	4.74966	4.75193	4.75154	4.74942	4.74571	4.73933	4.73634	4.75361	4.77088	4.78719	4.8034	4.8146	4.82343	4.83097	4.83692	4.84285	4.84877	4.85469	4.85426	4.85372	4.84777	4.84003	4.83286	4.82621	4.8199	4.81444	4.8088	4.79996	4.79113	4.78178	4.77231	4.78612	4.81618	4.84831	4.88418	4.91973
17	2	6.66324	6.69402	6.72479	6.73522	6.7395	6.74077	6.73944	6.73948	6.74269	6.74607	6.75169	6.75731	6.74272	6.72425	6.72114	6.72797	6.73329	6.7361	6.7385	6.7385	6.7385	6.72973	6.7201	6.69358	6.65905	6.64819	6.66665	6.67858	6.66654	6.6545	6.62511	6.5954	6.56841	6.54232	6.52496	6.51572	6.50649	6.49726	6.48471	6.41367	6.34262	6.28047	6.22026	6.16856	6.1228	6.07919	6.03945	5.99911
17	3	5.93496	5.94665	5.95835	5.96834	5.97781	5.98662	5.99486	6.00301	6.01098	6.01889	6.02592	6.03296	6.03488	6.03583	6.03507	6.03322	6.03155	6.03018	6.03165	6.05013	6.06861	6.08977	6.1112	6.13397	6.15738	6.18126	6.20571	6.23104	6.25958	6.28813	6.31627	6.34441	6.36704	6.38784	6.40124	6.40775	6.41239	6.41232	6.41205	6.40823	6.40441	6.39788	6.39076	6.38196	6.37198	6.36065	6.34685	6.33317
17	4	5.77024	5.79247	5.8147	5.8336	5.85149	5.86731	5.88132	5.89545	5.90988	5.92428	5.93836	5.95245	5.96651	5.98056	5.99573	6.01161	6.02914	6.04945	6.07024	6.094	6.11775	6.14576	6.17418	6.19687	6.21685	6.23448	6.2492	6.26281	6.27239	6.28196	6.28913	6.29624	6.29981	6.30218	6.29895	6.2905	6.28443	6.2843	6.28435	6.28764	6.29093	6.29638	6.30229	6.31524	6.33308	6.3532	6.3774	6.40248
17	5	3.51232	3.51708	3.52184	3.52714	3.53261	3.53865	3.54518	3.5521	3.55992	3.56775	3.57575	3.58374	3.59124	3.59863	3.61305	3.63201	3.65387	3.68054	3.70729	3.73455	3.76181	3.78737	3.81275	3.83623	3.8588	3.88044	3.90092	3.92156	3.94278	3.964	3.99021	4.01651	4.04361	4.07099	4.09874	4.12684	4.15836	4.19844	4.23856	4.27947	4.32038	4.3623	4.40445	4.4466	4.48875	4.53039	4.57113	4.61118
18	1	5.46967	5.54997	5.63028	5.65006	5.64203	5.64143	5.65348	5.66352	5.63943	5.61533	5.60017	5.58812	5.57607	5.56403	5.556	5.58009	5.60418	5.62827	5.65237	5.68806	5.73624	5.78041	5.8045	5.8286	5.84243	5.85447	5.87299	5.89708	5.9185	5.93054	5.94259	5.95463	5.96668	5.98586	6.00996	6.03739	6.07353	6.10967	6.12261	6.13466	6.17012	6.21831	6.26649	6.31468	6.36286	6.41105	6.45923	6.51589
18	2	5.80691	5.82486	5.8428	5.85656	5.86841	5.87945	5.88915	5.89886	5.9089	5.91894	5.92993	5.94126	5.9502	5.95593	5.96122	5.96304	5.96485	5.96446	5.96351	5.9608	5.9562	5.95025	5.93753	5.9248	5.90617	5.88651	5.86528	5.8427	5.81992	5.79647	5.77301	5.75172	5.73065	5.71495	5.70295	5.69603	5.70232	5.7086	5.71839	5.72831	5.7424	5.75875	5.77892	5.80672	5.83492	5.88359	5.93226	5.96824
18	3	5.61061	5.57336	5.53612	5.51316	5.49677	5.48247	5.47174	5.46106	5.45116	5.44125	5.43721	5.43523	5.43282	5.42984	5.42681	5.4234	5.41999	5.41371	5.40669	5.39729	5.3853	5.37268	5.35687	5.34107	5.32448	5.30774	5.29151	5.2757	5.25958	5.24238	5.22518	5.20733	5.18943	5.17567	5.16476	5.15526	5.14943	5.14359	5.13867	5.13378	5.12958	5.12576	5.12428	5.12749	5.13126	5.16501	5.19875	5.24429
19	1	5.21084	5.16201	5.11318	5.09023	5.10679	5.12335	5.13497	5.14529	5.15868	5.18539	5.2121	5.2353	5.25599	5.27669	5.29561	5.31449	5.33076	5.34266	5.35457	5.36606	5.37743	5.38883	5.40036	5.41189	5.42586	5.44173	5.45759	5.47723	5.49704	5.51553	5.53163	5.54773	5.55912	5.56895	5.57868	5.58784	5.597	5.6054	5.61315	5.6209	5.62315	5.62503	5.62706	5.62939	5.63172	5.6362	5.64147	5.64722
19	2	5.2622	5.27543	5.28867	5.30355	5.32095	5.33835	5.35464	5.37064	5.38664	5.40265	5.41867	5.43554	5.45303	5.47052	5.48561	5.50066	5.51452	5.52642	5.53831	5.54919	5.55978	5.57008	5.57899	5.5879	5.59567	5.60255	5.60943	5.61273	5.61586	5.62148	5.63164	5.6418	5.65131	5.6606	5.67068	5.68537	5.70007	5.7194	5.74265	5.7659	5.80294	5.8409	5.88104	5.92555	5.97005	6.01503	6.06019	6.10544
19	3	5.7002	5.71574	5.73128	5.73395	5.71699	5.70002	5.71251	5.73274	5.7532	5.77463	5.79606	5.81939	5.84407	5.86876	5.90858	5.94873	5.98873	6.02848	6.06824	6.0893	6.10482	6.1192	6.12791	6.13662	6.14274	6.14684	6.15094	6.14927	6.14735	6.14461	6.14039	6.13617	6.13331	6.13091	6.12852	6.12617	6.12383	6.12108	6.118	6.11492	6.11009	6.10514	6.09945	6.09231	6.08517	6.07813	6.07114	6.06407
19	4	5.62195	5.65536	5.68877	5.71597	5.73368	5.7514	5.75646	5.7582	5.75943	5.75849	5.75755	5.75802	5.75949	5.76097	5.7671	5.77333	5.77806	5.78028	5.7825	5.79323	5.80648	5.81898	5.82769	5.8364	5.84253	5.84665	5.85077	5.85808	5.86553	5.87357	5.88268	5.8918	5.90178	5.91205	5.92327	5.94006	5.95684	5.975	5.99433	6.01366	6.02515	6.03611	6.04506	6.04999	6.05492	6.06265	6.07141	6.0821
19	5	5.47885	5.56095	5.64306	5.69916	5.71558	5.732	5.75102	5.77073	5.78489	5.77504	5.76518	5.74958	5.72988	5.71018	5.69047	5.67077	5.65106	5.63136	5.61165	5.60714	5.60714	5.60911	5.62094	5.63277	5.64521	5.65814	5.67106	5.68428	5.69752	5.71366	5.73511	5.75656	5.76382	5.76634	5.76866	5.76975	5.77084	5.78569	5.81217	5.83866	5.85912	5.87918	5.90205	5.93054	5.95902	5.98586	6.01208	6.03785
20	1	4.89736	4.9215	4.94565	4.97209	4.99908	5.02681	5.05501	5.08338	5.11199	5.1408	5.17028	5.19882	5.2012	5.20357	5.2021	5.19991	5.19627	5.19185	5.18664	5.18049	5.1737	5.16514	5.15617	5.14184	5.12751	5.1273	5.12907	5.13843	5.15128	5.16328	5.1744	5.1803	5.17394	5.16696	5.1548	5.14264	5.14562	5.15006	5.16577	5.18588	5.2058	5.22556	5.24336	5.25726	5.27291	5.29923	5.32556	5.36661
20	2	5.40447	5.41046	5.41644	5.42691	5.43846	5.44652	5.4524	5.45608	5.45672	5.4575	5.45874	5.46008	5.46406	5.46803	5.47231	5.47664	5.48249	5.48917	5.49859	5.51129	5.52579	5.54535	5.5652	5.5888	5.6124	5.63085	5.64858	5.66814	5.68854	5.70714	5.7239	5.73947	5.75227	5.76459	5.77289	5.7812	5.78293	5.78403	5.78104	5.77646	5.76663	5.7521	5.73683	5.72007	5.70388	5.69107	5.67826	5.67355
20	3	5.62398	5.64128	5.65859	5.67377	5.68844	5.70475	5.72208	5.73844	5.75345	5.76745	5.77802	5.78869	5.80231	5.81594	5.83206	5.84865	5.86295	5.87602	5.89188	5.91107	5.93084	5.95225	5.9737	5.99566	6.01763	6.03626	6.05443	6.04717	6.02817	6.00899	5.98962	5.97047	5.95184	5.93237	5.90577	5.87917	5.85545	5.832	5.83415	5.84628	5.85676	5.86575	5.88581	5.92798	5.97049	6.01498	6.05947	6.10028
20	4	5.89997	5.92168	5.94338	5.96158	5.97895	5.99364	6.00667	6.00872	5.9957	5.98565	5.98565	5.98565	5.98565	5.98565	5.98565	5.98565	5.98565	5.98565	5.98565	5.98565	5.9925	6.01855	6.04276	6.04276	6.04276	6.03134	6.01832	6.01421	6.01421	6.027	6.05304	6.07132	6.07132	6.07269	6.08571	6.09874	6.12364	6.14968	6.17573	6.20177	6.22096	6.23399	6.24701	6.26003	6.27305	6.28608	6.2991	6.32446
20	5	5.81402	5.837	5.85998	5.88735	5.91577	5.9424	5.96792	5.99302	6.01755	6.04172	6.06469	6.0873	6.09963	6.11196	6.1205	6.12833	6.13452	6.13982	6.1437	6.14591	6.14768	6.14825	6.14905	6.15284	6.15663	6.16449	6.17292	6.18185	6.19101	6.20067	6.21086	6.22149	6.23316	6.24512	6.25953	6.27395	6.2885	6.30307	6.31803	6.33316	6.34767	6.36163	6.37597	6.39107	6.40538	6.41485	6.42431	6.43331
21	1	6.09553	6.10114	6.10676	6.11237	6.11792	6.12339	6.12875	6.13407	6.13938	6.14479	6.15148	6.15817	6.16487	6.17113	6.17695	6.18216	6.18713	6.19209	6.19647	6.19738	6.19829	6.1992	6.20236	6.20721	6.21516	6.22394	6.23273	6.23944	6.23853	6.23762	6.23671	6.23581	6.23492	6.23406	6.23319	6.23233	6.23201	6.23305	6.2341	6.23515	6.23712	6.23947	6.24302	6.24666	6.2503	6.25191	6.24986	6.24781
21	2	5.09664	5.07036	5.05872	5.10077	5.13831	5.16985	5.21152	5.25882	5.30612	5.3523	5.38383	5.40636	5.40636	5.4088	5.41367	5.41507	5.41507	5.40043	5.38691	5.38691	5.38691	5.38691	5.37511	5.35447	5.35005	5.35005	5.35005	5.35005	5.35005	5.35005	5.35005	5.36134	5.37891	5.38142	5.38153	5.38299	5.38341	5.38123	5.37894	5.37653	5.37121	5.36472	5.36213	5.36002	5.35899	5.35923	5.36173	5.36482
21	3	5.73755	5.75232	5.76914	5.79345	5.81821	5.84356	5.85522	5.85927	5.86572	5.87242	5.87709	5.88052	5.88084	5.88236	5.88507	5.88338	5.87992	5.87615	5.87451	5.88577	5.89579	5.90357	5.91076	5.91751	5.92406	5.93057	5.92778	5.92665	5.93163	5.93858	5.94817	5.95634	5.96371	5.97183	5.9805	5.99475	6.01149	6.03445	6.05296	6.06701	6.07369	6.07741	6.07605	6.07511	6.079	6.08141	6.08115	6.07801
21	4	5.99835	6.01634	6.03522	6.05738	6.0812	6.10723	6.13014	6.15132	6.17444	6.19804	6.22358	6.24973	6.27739	6.3059	6.33526	6.36563	6.39641	6.42791	6.45963	6.49227	6.52556	6.56001	6.60067	6.646	6.68796	6.729	6.7669	6.80437	6.84029	6.87514	6.90856	6.94109	6.97314	7.00621	7.03866	7.06083	7.08139	7.09794	7.11638	7.13671	7.14921	7.15858	7.16313	7.16762	7.17404	7.17942	7.18293	7.18575
21	5	5.32114	5.34318	5.36357	5.3779	5.38974	5.39825	5.40662	5.41491	5.42812	5.4423	5.45838	5.47429	5.48974	5.5078	5.52844	5.55464	5.58305	5.62	5.65827	5.7005	5.74445	5.79151	5.84038	5.8906	5.93868	5.98616	6.03371	6.08115	6.12824	6.17482	6.22071	6.26428	6.30657	6.34169	6.37487	6.39844	6.42207	6.44581	6.46841	6.48988	6.50965	6.52874	6.54408	6.55872	6.5708	6.58232	6.59282	6.60273
21	6	5.93975	5.92451	5.9087	5.8908	5.8739	5.85833	5.84567	5.83462	5.82696	5.81983	5.81236	5.80659	5.80505	5.80455	5.80509	5.80554	5.80595	5.80575	5.8056	5.80615	5.80675	5.80743	5.80764	5.80751	5.80917	5.81133	5.82296	5.83408	5.84335	5.85292	5.86289	5.87139	5.87909	5.88524	5.89129	5.8993	5.89782	5.87259	5.84861	5.82589	5.80325	5.78064	5.75811	5.73594	5.71587	5.69581	5.67574	5.66428
21	7	5.76292	5.74818	5.7347	5.72584	5.72537	5.73609	5.75763	5.78518	5.81582	5.84663	5.87304	5.9008	5.93192	5.96306	5.99424	6.02737	6.06126	6.09855	6.13545	6.16844	6.20404	6.24432	6.28392	6.32301	6.36164	6.40015	6.43507	6.46784	6.49277	6.52024	6.55111	6.58106	6.6105	6.6436	6.67755	6.71443	6.7513	6.78819	6.82637	6.86585	6.90326	6.93984	6.98497	7.03008	7.07115	7.10778	7.13642	7.16448
[truncated: 78 more columns]

## Sheet: TeTX2.xls
Session	Step	1	2	3	4	5	6	7	8	9	10	11	12	13	14	15	16	17	18	19	20	21	22	23	24	25	26	27	28	29	30	31	32	33	34	35	36	37	38	39	40	41	42	43	44	45	46	47	48
1	1	5.7707	5.7707	5.77263	5.79763	5.82264	5.84765	5.87265	5.89766	5.92267	5.94767	5.96306	5.96306	5.95729	5.94479	5.92555	5.90055	5.87554	5.85053	5.82553	5.80052	5.78513	5.77263	5.74955	5.72454	5.69953	5.67453	5.63702	5.59951	5.562	5.52256	5.47255	5.42831	5.4033	5.37445	5.33694	5.30424	5.27923	5.25423	5.22922	5.21095	5.19844	5.18594	5.17344	5.17825	5.19075	5.20325	5.21576	5.22826
1	2	5.41004	5.51006	5.60547	5.64548	5.68241	5.70242	5.72127	5.73627	5.74666	5.74666	5.75042	5.7602	5.7701	5.78013	5.79264	5.80728	5.82597	5.84719	5.87269	5.90008	5.92303	5.94464	5.96381	5.98253	5.99935	6.016	6.03021	6.0441	6.05425	6.06418	6.07298	6.0813	6.08807	6.09353	6.09607	6.09759	6.09748	6.09863	6.10126	6.10146	6.0996	6.09868	6.09834	6.09926	6.10074	6.10494	6.10995	6.12059
1	3	5.80462	5.80462	5.80544	5.81602	5.82674	5.83829	5.84783	5.85071	5.85034	5.84265	5.83089	5.81261	5.78946	5.7606	5.72605	5.68662	5.64541	5.60309	5.5681	5.53636	5.51276	5.4916	5.47939	5.46881	5.468	5.468	5.47954	5.49108	5.50262	5.51416	5.52571	5.53725	5.54879	5.55796	5.56181	5.56677	5.5735	5.58245	5.59399	5.60294	5.60968	5.6099	5.60605	5.60965	5.61655	5.66402	5.72365	5.77218
1	4	5.28981	5.35137	5.40956	5.42738	5.44221	5.44054	5.44139	5.45062	5.45986	5.46909	5.47625	5.4801	5.48315	5.48526	5.49121	5.50044	5.50968	5.51891	5.52814	5.53738	5.54424	5.5504	5.54353	5.5343	5.53891	5.54469	5.55815	5.57185	5.58839	5.60239	5.60239	5.60399	5.61092	5.6163	5.61822	5.61556	5.60556	5.58739	5.55969	5.52727	5.49081	5.45641	5.4233	5.40032	5.38186	5.35438	5.3242	5.29526
1	5	5.23816	5.23816	5.23732	5.22636	5.21527	5.20354	5.19181	5.18007	5.16567	5.14528	5.12371	5.10024	5.08006	5.06371	5.04985	5.03811	5.02638	5.01465	5.0129	5.01559	5.03427	5.05773	5.0812	5.10467	5.12814	5.1516	5.17334	5.19416	5.20397	5.21049	5.19895	5.19007	5.19007	5.19007	5.19007	5.19007	5.19007	5.19895	5.21819	5.2397	5.26317	5.29161	5.32316	5.35723	5.39243	5.4226	5.45127	5.47065
2	1	6.00915	6.00989	6.01065	6.01177	6.01288	6.01402	6.0151	6.01597	6.01664	6.01687	6.01697	6.01688	6.0167	6.01642	6.01596	6.01533	6.01439	6.01326	6.01175	6.01008	6.00897	6.00803	6.00784	6.00779	6.00829	6.00882	6.00924	6.00965	6.00997	6.0104	6.01134	6.0129	6.01647	6.02097	6.02756	6.03394	6.04001	6.04636	6.05305	6.06081	6.06948	6.08491	6.10456	6.13774	6.17694	6.2166	6.25639	6.29599
2	2	6.64943	6.6694	6.69041	6.72403	6.75793	6.7933	6.82699	6.85507	6.87866	6.89215	6.90177	6.90518	6.90963	6.91528	6.91825	6.91895	6.91261	6.90189	6.90149	6.9057	6.9124	6.91986	6.93253	6.94615	6.96591	6.98617	7.01192	7.03732	7.05854	7.07875	7.09343	7.10463	7.10422	7.09872	7.08177	7.06447	7.04658	7.02864	7.01064	6.992	6.97282	6.9532	6.9333	6.91389	6.89468	6.88323	6.87411	6.87104
2	3	5.438	5.43184	5.42601	5.42417	5.42319	5.42691	5.43155	5.43925	5.44582	5.44982	5.45351	5.45669	5.45996	5.46334	5.46704	5.47103	5.47556	5.48043	5.48585	5.4915	5.49881	5.50661	5.51509	5.52369	5.53268	5.5417	5.55122	5.56076	5.57059	5.58043	5.5904	5.60043	5.61065	5.62104	5.63185	5.64338	5.65605	5.66905	5.68241	5.69392	5.70385	5.71222	5.71961	5.72663	5.73347	5.73969	5.74573	5.74798
2	4	6.79252	6.79325	6.79455	6.80264	6.81089	6.82003	6.82931	6.83906	6.85272	6.87518	6.90193	6.93553	6.96918	7.00289	7.0353	7.06659	7.09589	7.12396	7.15237	7.18094	7.21102	7.24157	7.25955	7.27524	7.27766	7.27898	7.2781	7.27734	7.27803	7.27885	7.2804	7.28204	7.28402	7.28603	7.28811	7.29015	7.29215	7.29416	7.29617	7.29856	7.30126	7.30521	7.30994	7.31681	7.32465	7.33185	7.33886	7.34496
2	5	5.61076	5.62643	5.64209	5.65771	5.67387	5.693	5.71311	5.73644	5.75963	5.78246	5.8049	5.82669	5.84936	5.87306	5.89742	5.92234	5.94709	5.97172	5.99369	6.01447	6.03351	6.05203	6.07031	6.08854	6.10867	6.12895	6.15452	6.18104	6.21904	6.25741	6.29779	6.33778	6.37645	6.41432	6.45041	6.48831	6.52913	6.561	6.58245	6.59554	6.60145	6.60109	6.59681	6.59002	6.58212	6.57504	6.5682	6.56001
2	6	5.28351	5.26474	5.24615	5.22988	5.21404	5.20053	5.18803	5.17885	5.17271	5.17339	5.17391	5.17417	5.17434	5.17439	5.17439	5.17436	5.17427	5.17414	5.17295	5.17129	5.16959	5.16789	5.16697	5.1662	5.16466	5.16306	5.15661	5.14958	5.13563	5.12039	5.09813	5.078	5.06497	5.05709	5.0608	5.06471	5.06894	5.07145	5.07194	5.06982	5.06545	5.05931	5.05205	5.04472	5.03734	5.03028	5.0233	5.02096
2	7	6.10537	6.12223	6.13898	6.1543	6.16909	6.18097	6.19197	6.20004	6.20768	6.21431	6.22055	6.22614	6.23497	6.24757	6.2604	6.27342	6.28311	6.2907	6.31077	6.33639	6.34945	6.35874	6.37195	6.38586	6.40414	6.42278	6.43289	6.44225	6.44245	6.44129	6.43269	6.42533	6.42215	6.42169	6.42733	6.42666	6.41588	6.40294	6.38748	6.37494	6.36489	6.35633	6.3487	6.33873	6.32773	6.31199	6.29482	6.2836
3	1	5.28026	5.3165	5.35194	5.37799	5.40273	5.42038	5.43758	5.45329	5.47018	5.48973	5.50944	5.52942	5.54698	5.56172	5.5676	5.5659	5.56055	5.55291	5.54357	5.53346	5.52341	5.51337	5.50353	5.49373	5.48421	5.4747	5.45439	5.43399	5.41258	5.39121	5.36995	5.35056	5.3374	5.32782	5.32632	5.32926	5.33932	5.35864	5.38877	5.4217	5.45701	5.49366	5.53115	5.5696	5.60848	5.64877	5.68948	5.73164
3	2	5.72287	5.72287	5.72323	5.72784	5.73303	5.74141	5.74992	5.75886	5.7678	5.77675	5.78569	5.79463	5.80358	5.81252	5.82387	5.83729	5.85005	5.8624	5.87151	5.87917	5.8816	5.88245	5.88258	5.88258	5.88258	5.88258	5.88258	5.88248	5.8812	5.87969	5.87697	5.87349	5.86748	5.86309	5.86231	5.86262	5.86466	5.86704	5.86981	5.87226	5.87444	5.87794	5.88226	5.88978	5.89873	5.90715	5.91542	5.9243
3	3	5.94368	5.95437	5.96514	5.97691	5.98889	6.00205	6.01622	6.03371	6.04763	6.05354	6.05716	6.05711	6.05679	6.05616	6.05632	6.05714	6.05671	6.05549	6.05086	6.04471	6.03717	6.0292	6.02608	6.02385	6.0285	6.03372	6.03899	6.04414	6.04786	6.05134	6.05344	6.05484	6.05389	6.05245	6.04988	6.04613	6.04047	6.03111	6.01743	6.00154	5.98376	5.96457	5.94449	5.92287	5.90055	5.87908	5.85787	5.83725
3	4	6.05222	6.10974	6.16821	6.23807	6.30922	6.38746	6.46299	6.52942	6.59871	6.67442	6.7501	6.82573	6.89375	6.9529	7.00692	7.05654	7.10354	7.14891	7.19215	7.23444	7.27158	7.30717	7.33845	7.36895	7.39453	7.4197	7.45007	7.47865	7.48587	7.49018	7.47854	7.46627	7.45193	7.43063	7.39369	7.35216	7.30332	7.25352	7.20259	7.14137	7.07132	7.00527	6.94172	6.89474	6.85511	6.80781	6.75821	6.72307
3	5	7.05377	7.09905	7.14511	7.20048	7.25709	7.32056	7.38408	7.44777	7.50999	7.56887	7.6264	7.68175	7.73529	7.7867	7.83488	7.88027	7.91793	7.95075	7.96855	7.97966	7.94507	7.89677	7.83732	7.77583	7.7077	7.63902	7.56143	7.48331	7.39888	7.31359	7.2235	7.13305	7.04136	6.95618	6.88568	6.82105	6.7658	6.71808	6.67913	6.6408	6.60298	6.56572	6.5288	6.49266	6.45687	6.42651	6.39779	6.37183
3	6	4.92433	4.93321	4.94266	4.95892	4.97615	4.99864	5.02173	5.04678	5.07054	5.0914	5.11171	5.13114	5.15166	5.17344	5.19269	5.20976	5.22489	5.2388	5.25018	5.26043	5.26649	5.27129	5.26736	5.26184	5.2452	5.22764	5.21023	5.19277	5.17478	5.1567	5.13815	5.11942	5.10007	5.08214	5.0674	5.05328	5.04016	5.02593	5.0104	4.99752	4.98691	4.97901	4.97281	4.97077	4.97057	4.96938	4.96788	4.97459
4	1	5.45895	5.48943	5.51932	5.54212	5.56362	5.57799	5.59236	5.60672	5.6214	5.63684	5.65204	5.66687	5.68151	5.69592	5.71059	5.72547	5.74077	5.75632	5.77266	5.78934	5.80588	5.82237	5.83953	5.85681	5.8757	5.89472	5.91234	5.9298	5.94536	5.96089	5.97629	5.99168	6.00697	6.02129	6.03343	6.04486	6.05517	6.06446	6.07255	6.07924	6.08473	6.08948	6.09376	6.09876	6.10408	6.10987	6.1158	6.12132
4	2	5.47031	5.5079	5.5455	5.58318	5.6212	5.66111	5.70192	5.74576	5.7901	5.83559	5.88046	5.92435	5.96702	6.00827	6.04808	6.08666	6.12022	6.15064	6.17797	6.20392	6.22226	6.2383	6.25098	6.26304	6.27322	6.28323	6.29145	6.29949	6.30548	6.31104	6.31429	6.3168	6.3168	6.31549	6.3112	6.30368	6.29099	6.27448	6.2535	6.23049	6.20574	6.18296	6.16142	6.14378	6.12789	6.12041	6.11546	6.12516
4	3	5.49184	5.47302	5.45639	5.46613	5.47684	5.49294	5.51065	5.53371	5.5582	5.58592	5.61308	5.63936	5.66334	5.68465	5.70279	5.71822	5.72406	5.7239	5.72236	5.72021	5.71942	5.71904	5.71883	5.71865	5.7186	5.71855	5.72166	5.72512	5.73278	5.74068	5.7499	5.75822	5.76352	5.76671	5.76514	5.75991	5.74884	5.74243	5.74144	5.74096	5.74092	5.74091	5.74093	5.74336	5.74686	5.75576	5.76627	5.78151
4	4	5.15269	5.17029	5.18763	5.20172	5.21545	5.22718	5.23834	5.2476	5.25563	5.26085	5.26448	5.26555	5.26554	5.26427	5.26271	5.26091	5.25939	5.25804	5.25605	5.25379	5.25179	5.24987	5.25368	5.25852	5.26517	5.27196	5.27759	5.28331	5.28992	5.29692	5.30608	5.31505	5.32344	5.33112	5.3372	5.34403	5.35205	5.36081	5.37043	5.38124	5.39306	5.40359	5.41332	5.42343	5.43371	5.44429	5.45495	5.46608
4	5	5.67348	5.66893	5.66431	5.65891	5.65394	5.65133	5.64955	5.6505	5.65216	5.65538	5.65851	5.66149	5.66494	5.66894	5.67599	5.68567	5.69226	5.69692	5.70314	5.71005	5.72048	5.73197	5.74554	5.7595	5.7745	5.78958	5.80784	5.82638	5.84827	5.87058	5.89513	5.92016	5.94681	5.97342	5.99994	6.02492	6.04744	6.06977	6.09188	6.11072	6.12676	6.14032	6.15234	6.16141	6.16916	6.17346	6.17672	6.17752
4	6	5.12297	5.13601	5.14797	5.14702	5.14601	5.14464	5.14252	5.13787	5.13276	5.12659	5.12053	5.11464	5.1083	5.10146	5.09468	5.08797	5.0862	5.08753	5.09324	5.10089	5.10966	5.11875	5.12919	5.13988	5.15236	5.16499	5.17434	5.18271	5.17938	5.17388	5.15637	5.13826	5.11812	5.09955	5.08451	5.06605	5.04215	5.02	4.99989	4.98498	4.97453	4.96609	4.95891	4.94658	4.93196	4.91165	4.88963	4.86542
4	7	4.6565	4.65833	4.66054	4.66755	4.67487	4.68398	4.69339	4.70384	4.71504	4.72794	4.74288	4.76109	4.78176	4.80532	4.82903	4.85288	4.87746	4.9025	4.92832	4.95448	4.98089	5.00737	5.03291	5.05829	5.07943	5.10023	5.11903	5.1378	5.15633	5.17472	5.19243	5.20991	5.22659	5.24291	5.25841	5.27348	5.28787	5.30314	5.31942	5.33619	5.35337	5.37092	5.38869	5.40702	5.42559	5.44504	5.46475	5.48564
5	1	5.86781	5.84649	5.82842	5.84919	5.87275	5.91165	5.94453	5.95732	5.97289	5.99472	6.01473	6.03184	6.04525	6.05435	6.05855	6.05855	6.0658	6.07759	6.09136	6.10601	6.11714	6.12721	6.13101	6.13367	6.12969	6.12516	6.11331	6.10075	6.07961	6.05436	6.00644	5.95748	5.90504	5.8539	5.80568	5.76119	5.72265	5.68698	5.65466	5.62353	5.59344	5.56103	5.52718	5.50872	5.49712	5.48744	5.47834	5.46902
5	2	5.81838	5.87024	5.92101	5.95871	5.99521	6.02516	6.05589	6.08923	6.12261	6.15609	6.19005	6.22478	6.25963	6.29459	6.32276	6.34508	6.3635	6.37947	6.39329	6.40615	6.41834	6.43033	6.43488	6.43808	6.43835	6.43837	6.43654	6.4348	6.43408	6.43268	6.4276	6.42143	6.41161	6.40014	6.38495	6.3675	6.34646	6.32363	6.2987	6.27256	6.24539	6.21813	6.19081	6.16928	6.1503	6.13431	6.11921	6.10646
5	3	5.91057	5.92375	5.93712	5.95269	5.96856	5.98605	6.00387	6.02278	6.0411	6.05808	6.0754	6.09327	6.11226	6.13256	6.15882	6.1902	6.21773	6.24285	6.26513	6.28613	6.30472	6.32259	6.33613	6.34888	6.35922	6.36936	6.37533	6.38043	6.37498	6.36722	6.34678	6.32465	6.29686	6.26756	6.23489	6.20212	6.16921	6.1306	6.08534	6.03625	5.98388	5.93133	5.87867	5.83119	5.78602	5.7479	5.7119	5.68429
5	4	4.86934	4.88532	4.90174	4.92353	4.94581	4.97074	4.99531	5.01871	5.04211	5.06552	5.0916	5.12193	5.15606	5.19464	5.23554	5.27844	5.32037	5.36171	5.40231	5.44258	5.48216	5.52155	5.56145	5.60144	5.6378	5.67386	5.70438	5.73402	5.75313	5.77188	5.78863	5.80495	5.81984	5.83414	5.84712	5.85867	5.86793	5.87597	5.88258	5.88705	5.88967	5.88782	5.88317	5.87611	5.86798	5.85786	5.84714	5.83447
6	1	5.75127	5.78143	5.81124	5.83689	5.86151	5.88042	5.89866	5.91465	5.93026	5.94505	5.95901	5.97164	5.98235	5.99081	5.99634	5.99934	5.99965	5.99827	5.99645	5.99444	5.99278	5.99121	5.99039	5.98971	5.98615	5.98235	5.97603	5.96972	5.96355	5.95842	5.9589	5.96295	5.9789	5.99924	6.02949	6.05995	6.09078	6.1224	6.15497	6.18963	6.22607	6.26475	6.30483	6.34669	6.38933	6.43489	6.48132	6.52591
6	2	6.04353	6.06734	6.09091	6.11173	6.13231	6.15159	6.17098	6.19073	6.21086	6.23185	6.25204	6.27095	6.28797	6.30279	6.31756	6.33229	6.34544	6.35762	6.3698	6.38197	6.394	6.40599	6.41619	6.42607	6.43329	6.44028	6.44681	6.4533	6.45937	6.46515	6.46933	6.47317	6.47586	6.47823	6.47986	6.48118	6.48197	6.4832	6.48494	6.48696	6.48921	6.49272	6.49703	6.50219	6.50773	6.51306	6.51832	6.52267
6	3	5.75913	5.79345	5.82761	5.85996	5.89229	5.92451	5.95609	5.98553	6.01362	6.03867	6.06215	6.08312	6.10261	6.12038	6.13634	6.15074	6.16216	6.17172	6.17831	6.18358	6.18154	6.17733	6.1605	6.14139	6.12243	6.10348	6.08714	6.07067	6.05257	6.03323	6.00708	5.97951	5.94723	5.92066	5.90695	5.88326	5.84359	5.80137	5.75617	5.71209	5.66897	5.6321	5.59913	5.57173	5.5468	5.52759	5.51008	5.50042
6	4	6.25993	6.29295	6.32549	6.35227	6.37876	6.40364	6.42798	6.45051	6.47147	6.48893	6.50342	6.51314	6.51896	6.5202	6.51764	6.51181	6.50222	6.49027	6.47211	6.45118	6.42776	6.40359	6.37887	6.35405	6.32779	6.30141	6.27136	6.24096	6.2064	6.17147	6.13453	6.0979	6.06236	6.02756	5.99445	5.96166	5.92942	5.90064	5.8759	5.8594	5.84997	5.85037	5.85692	5.86921	5.88404	5.90088	5.91832	5.93616
6	5	5.71646	5.77913	5.83741	5.84295	5.84713	5.84382	5.84	5.8345	5.82783	5.81855	5.81159	5.80835	5.81114	5.82095	5.83003	5.83848	5.84217	5.8429	5.83827	5.83126	5.83326	5.83796	5.84602	5.85469	5.85311	5.85067	5.84699	5.84391	5.84805	5.85342	5.86552	5.87793	5.89138	5.89902	5.89356	5.88268	5.86312	5.8434	5.8235	5.8029	5.78169	5.75914	5.73576	5.71235	5.68891	5.66858	5.64918	5.64176
6	6	5.95833	5.98017	6.00105	6.01062	6.02025	6.03017	6.03989	6.04894	6.0582	6.06791	6.07782	6.08804	6.09644	6.1027	6.10462	6.10283	6.09691	6.08843	6.07847	6.06785	6.05723	6.04661	6.0364	6.02626	6.02245	6.01917	6.02481	6.03116	6.0461	6.06211	6.084	6.10581	6.12739	6.14635	6.15942	6.16988	6.17617	6.18121	6.1848	6.18526	6.18303	6.17476	6.16271	6.14707	6.12984	6.11913	6.11038	6.11211
6	7	6.25915	6.25113	6.24327	6.23724	6.23171	6.22889	6.22615	6.22366	6.22395	6.23048	6.23936	6.25199	6.26234	6.27003	6.27539	6.27874	6.27549	6.26811	6.25846	6.2478	6.24206	6.2378	6.2365	6.23575	6.22127	6.20564	6.18881	6.17239	6.16077	6.14893	6.13591	6.12222	6.10629	6.09112	6.07766	6.07229	6.07985	6.08758	6.0955	6.10284	6.10969	6.11368	6.11589	6.11564	6.11431	6.11238	6.11027	6.10878
7	1	6.3542	6.35577	6.35727	6.35793	6.35854	6.35893	6.36204	6.37425	6.38741	6.40275	6.41906	6.43695	6.45559	6.47512	6.49478	6.51455	6.53422	6.55384	6.57213	6.58983	6.60426	6.61771	6.62761	6.63687	6.63789	6.63823	6.62984	6.62117	6.60905	6.59689	6.5845	6.56959	6.54627	6.52218	6.49634	6.47165	6.44879	6.42266	6.39271	6.36303	6.33357	6.30716	6.28266	6.25963	6.23726	6.21812	6.19996	6.18743
7	2	6.09213	6.09542	6.09896	6.10557	6.11267	6.12244	6.1328	6.14512	6.15756	6.17024	6.18303	6.19599	6.20901	6.2221	6.23589	6.25028	6.2667	6.28439	6.31288	6.34618	6.37795	6.40925	6.43885	6.46814	6.49339	6.5183	6.53974	6.56098	6.57976	6.59791	6.61257	6.62773	6.6445	6.65945	6.67028	6.67431	6.66746	6.65664	6.64119	6.62443	6.60654	6.58833	6.56991	6.55507	6.54182	6.53275	6.52494	6.52373
7	3	5.59146	5.67836	5.76427	5.83842	5.91073	5.97299	6.03404	6.09111	6.14905	6.20892	6.26892	6.32912	6.38102	6.42322	6.46263	6.49965	6.5326	6.563	6.57866	6.58777	6.59669	6.60557	6.61178	6.61752	6.61072	6.60288	6.58929	6.57565	6.56139	6.54804	6.5397	6.53215	6.52728	6.52588	6.53229	6.54911	6.58256	6.6159	6.64913	6.67938	6.70708	6.72758	6.74358	6.76003	6.77669	6.7896	6.80139	6.80579
7	4	5.51497	5.51497	5.51566	5.52469	5.53498	5.55224	5.56947	5.58662	5.6039	5.62146	5.63936	5.65781	5.67887	5.70298	5.72856	5.75541	5.78092	5.8056	5.8132	5.8132	5.81747	5.82304	5.83087	5.83912	5.84657	5.85397	5.85792	5.86164	5.86261	5.86276	5.85848	5.85323	5.84479	5.83676	5.82961	5.82522	5.82522	5.82382	5.82079	5.81784	5.81498	5.81337	5.81255	5.80803	5.80187	5.79398	5.78558	5.77533
8	1	5.02402	5.03814	5.05161	5.05726	5.06107	5.05476	5.04942	5.0473	5.04504	5.0425	5.03843	5.03194	5.027	5.0239	5.02187	5.02076	5.02154	5.02349	5.02533	5.02712	5.02877	5.03039	5.03162	5.0328	5.03392	5.03504	5.03616	5.03741	5.04029	5.04331	5.04706	5.0511	5.05613	5.06323	5.07502	5.08884	5.10593	5.1289	5.15873	5.18813	5.21714	5.24505	5.27227	5.29881	5.32506	5.34925	5.37284	5.38915
8	2	5.48065	5.48705	5.49358	5.50175	5.5103	5.52098	5.52756	5.5205	5.51207	5.50058	5.48817	5.47428	5.46002	5.44534	5.43064	5.41595	5.40445	5.39494	5.38506	5.37501	5.36452	5.35391	5.35541	5.35911	5.36728	5.37583	5.39147	5.40729	5.42519	5.44335	5.46291	5.48357	5.5079	5.53145	5.55322	5.57423	5.594	5.61269	5.63013	5.64507	5.65787	5.66627	5.67192	5.67757	5.68322	5.68755	5.69148	5.69025
8	3	5.41522	5.40454	5.39567	5.40854	5.42653	5.47265	5.51431	5.54107	5.56663	5.58948	5.6124	5.63545	5.65732	5.67783	5.69723	5.71567	5.7282	5.73705	5.74194	5.74509	5.74363	5.7408	5.73608	5.73103	5.726	5.72098	5.71655	5.71172	5.70207	5.692	5.67964	5.6662	5.64915	5.63047	5.60812	5.58417	5.55767	5.53054	5.50269	5.47568	5.4494	5.42467	5.4009	5.38219	5.36573	5.35381	5.34326	5.34514
8	4	5.70294	5.74797	5.7927	5.83376	5.87395	5.90938	5.94655	5.98953	6.03096	6.06891	6.099	6.11651	6.13683	6.16041	6.18499	6.21044	6.22597	6.23529	6.24467	6.25406	6.2635	6.27296	6.27519	6.27612	6.27619	6.27619	6.27619	6.27619	6.27619	6.27614	6.27585	6.27516	6.27316	6.27141	6.27023	6.26928	6.26873	6.26041	6.24301	6.22539	6.20758	6.18976	6.17195	6.1591	6.14845	6.13906	6.13004	6.1207
8	5	5.21344	5.25144	5.28986	5.3334	5.37814	5.42949	5.47811	5.51757	5.55583	5.59138	5.62521	5.65627	5.68578	5.71351	5.73969	5.76456	5.78062	5.79118	5.80011	5.80832	5.81463	5.82037	5.82747	5.83481	5.84113	5.84737	5.85084	5.85411	5.85505	5.85579	5.85538	5.85441	5.85156	5.84753	5.84085	5.83301	5.82334	5.81431	5.80605	5.79751	5.78875	5.77947	5.76987	5.76078	5.7519	5.74199	5.73176	5.71691
8	6	3.69314	3.67826	3.6636	3.65138	3.63975	3.6313	3.62452	3.62332	3.62257	3.62281	3.62297	3.62302	3.62386	3.62563	3.62816	3.63135	3.63865	3.64853	3.6572	3.66533	3.67204	3.67833	3.68398	3.68952	3.69669	3.704	3.7153	3.7266	3.73789	3.74919	3.76049	3.77178	3.78308	3.79449	3.80615	3.81791	3.82985	3.84138	3.85244	3.86319	3.87365	3.88357	3.89314	3.90563	3.91942	3.93376	3.94828	3.96189
9	1	5.68525	5.71439	5.74308	5.7665	5.789	5.80644	5.82397	5.84183	5.85963	5.87731	5.89492	5.9124	5.92773	5.94054	5.95293	5.96496	5.97656	5.98788	5.99998	6.01241	6.02279	6.03255	6.03908	6.04503	6.04781	6.05033	6.05283	6.05536	6.05837	6.06096	6.06125	6.0611	6.05949	6.05709	6.0529	6.04977	6.04834	6.04696	6.04564	6.04398	6.04202	6.03851	6.03404	6.03031	6.02692	6.02603	6.02589	6.0244
9	2	5.98171	5.97002	5.95915	5.95797	5.95847	5.96829	5.97824	5.9886	6.00038	6.01535	6.03236	6.05261	6.07451	6.09833	6.12284	6.14795	6.17392	6.20043	6.22922	6.25902	6.29041	6.32228	6.35627	6.39066	6.42345	6.45611	6.4822	6.50753	6.52383	6.53831	6.54274	6.54616	6.5462	6.54476	6.54003	6.53	6.51151	6.49092	6.46787	6.44248	6.41508	6.38835	6.36204	6.33651	6.31134	6.28764	6.26438	6.23969
9	3	5.84602	5.92281	6.00012	6.08367	6.16831	6.25893	6.34474	6.41448	6.48204	6.54465	6.60434	6.65932	6.70888	6.75211	6.7901	6.8236	6.85	6.87196	6.88376	6.89105	6.89867	6.90638	6.91588	6.92571	6.9367	6.9478	6.96323	6.97915	7.001	7.02046	7.02674	7.03259	7.03701	7.04154	7.04629	7.04924	7.0493	7.04877	7.04755	7.0458	7.04359	7.03375	7.01914	7.00262	6.98526	6.96738	6.94933	6.93618
9	4	6.02472	6.06686	6.10901	6.15126	6.19353	6.2359	6.27751	6.3166	6.35666	6.39889	6.44256	6.4885	6.52931	6.56412	6.59767	6.63013	6.66119	6.69136	6.71909	6.74572	6.77439	6.80368	6.83641	6.86975	6.90999	6.9508	6.9926	7.03444	7.07659	7.11989	7.16945	7.21805	7.26347	7.30623	7.34302	7.38032	7.41842	7.44912	7.47117	7.47686	7.46853	7.46145	7.45516	7.44347	7.42939	7.40225	7.3712	7.35026
9	5	6.06402	6.02758	5.9918	5.96411	5.93783	5.91931	5.90456	5.90239	5.90263	5.90828	5.91721	5.93141	5.952	5.98007	6.01097	6.0443	6.0812	6.12033	6.16017	6.20033	6.23774	6.27432	6.30661	6.33812	6.35952	6.38008	6.39435	6.40802	6.4144	6.42012	6.42219	6.42452	6.42773	6.43182	6.43792	6.44667	6.45967	6.47333	6.48775	6.50248	6.51746	6.53168	6.54543	6.55752	6.56887	6.5768	6.5837	6.5863
9	6	5.5445	5.57356	5.60256	5.63082	5.65895	5.68637	5.71337	5.73894	5.76403	5.78805	5.8114	5.83368	5.8551	5.87549	5.89519	5.91431	5.93251	5.95013	5.96619	5.98156	5.996	6.01017	6.02312	6.03585	6.04494	6.05372	6.05896	6.06383	6.06427	6.06423	6.06164	6.05863	6.05422	6.04909	6.0423	6.03322	6.02045	6.00664	5.99163	5.97534	5.95796	5.93856	5.91789	5.89584	5.87318	5.84836	5.8229	5.79585
10	1	5.74389	5.77186	5.80041	5.83589	5.87258	5.91593	5.95842	5.99805	6.03824	6.07968	6.12196	6.16559	6.20659	6.24453	6.27971	6.31252	6.34156	6.36824	6.38859	6.40613	6.41743	6.42686	6.42756	6.42668	6.41725	6.40711	6.39659	6.38613	6.37646	6.36681	6.35725	6.34589	6.32858	6.30723	6.27681	6.24909	6.22569	6.20329	6.18205	6.16184	6.14251	6.12091	6.0979	6.07317	6.04769	6.01942	5.99032	5.97572
10	2	6.16396	6.1939	6.22198	6.2277	6.22952	6.20988	6.19228	6.18153	6.17117	6.16168	6.15265	6.14436	6.14081	6.14277	6.14849	6.15741	6.17135	6.18844	6.20517	6.22175	6.23763	6.2533	6.26794	6.2824	6.29624	6.31002	6.32868	6.34791	6.3741	6.39741	6.40483	6.41176	6.41705	6.4225	6.42835	6.43677	6.44931	6.46235	6.47598	6.4896	6.50323	6.51021	6.51303	6.51049	6.50557	6.49169	6.4751	6.4603
10	3	5.34146	5.35272	5.36408	5.3768	5.38976	5.40402	5.41753	5.42856	5.44002	5.45245	5.46553	5.47966	5.49591	5.51463	5.53294	5.55091	5.56812	5.58486	5.59864	5.6111	5.62743	5.64493	5.66874	5.69369	5.71205	5.72986	5.74694	5.76403	5.78111	5.79535	5.79396	5.79211	5.78876	5.78566	5.7831	5.77673	5.76427	5.74954	5.73219	5.71152	5.68803	5.66416	5.64007	5.61385	5.58669	5.55481	5.52152	5.48808
10	4	5.41768	5.4695	5.52035	5.55963	5.59689	5.62305	5.65099	5.68492	5.71773	5.74805	5.77669	5.80264	5.8298	5.85836	5.88933	5.92238	5.95882	5.99738	6.03882	6.08154	6.12495	6.16857	6.21288	6.25732	6.29971	6.34192	6.38025	6.41814	6.45087	6.48242	6.50748	6.53169	6.55307	6.57307	6.58995	6.60448	6.61525	6.62394	6.6302	6.63292	6.6326	6.63504	6.6392	6.64288	6.64636	6.64736	6.64761	6.6429
10	5	6.22749	6.26807	6.30795	6.33933	6.36922	6.39095	6.41094	6.42511	6.43842	6.44978	6.45999	6.46834	6.47331	6.47434	6.47689	6.48074	6.48707	6.49493	6.49403	6.48922	6.48458	6.47998	6.47675	6.47377	6.47328	6.47301	6.47247	6.47188	6.47053	6.46829	6.46118	6.45346	6.4437	6.43295	6.41999	6.41007	6.405	6.40051	6.39671	6.3929	6.38908	6.38317	6.37596	6.36835	6.36056	6.35288	6.34524	6.34286
11	1	4.81809	4.83664	4.85595	4.88419	4.91372	4.95037	4.98493	5.01251	5.04032	5.06866	5.0972	5.12603	5.15443	5.18233	5.20953	5.23612	5.262	5.28745	5.31146	5.33483	5.36033	5.38648	5.41419	5.44219	5.47192	5.5018	5.53025	5.55867	5.58674	5.61494	5.6438	5.67083	5.69177	5.71245	5.73258	5.75457	5.77957	5.80457	5.82957	5.85457	5.87957	5.90457	5.92957	5.95277	5.97518	6.00219	6.03058	6.06856
11	2	5.33537	5.31369	5.2931	5.28558	5.28013	5.28605	5.29435	5.31061	5.32402	5.33104	5.33556	5.33608	5.33899	5.34468	5.34956	5.35376	5.3571	5.35991	5.36077	5.36077	5.36077	5.36077	5.35852	5.35586	5.34215	5.32751	5.31288	5.29839	5.2856	5.27378	5.26728	5.2619	5.26027	5.25915	5.25915	5.25915	5.25915	5.25915	5.25915	5.25915	5.25915	5.25915	5.25915	5.26577	5.27534	5.28585	5.29664	5.30656
11	3	5.07774	5.16108	5.24193	5.29296	5.33937	5.36037	5.37873	5.38829	5.39876	5.41132	5.42481	5.43982	5.45559	5.47226	5.49067	5.51058	5.53196	5.55427	5.57815	5.60272	5.63132	5.66113	5.69195	5.72295	5.74762	5.77175	5.77888	5.78543	5.78492	5.78415	5.78191	5.77893	5.77345	5.76825	5.76368	5.76115	5.76187	5.76263	5.76343	5.76553	5.76874	5.7751	5.78343	5.7965	5.81167	5.82789	5.84443	5.86108
11	4	5.91717	5.93792	5.95862	5.97865	5.99854	6.01763	6.03524	6.04794	6.06071	6.07363	6.08658	6.09958	6.11212	6.12414	6.13552	6.14636	6.15606	6.16507	6.16933	6.17147	6.17527	6.17956	6.18419	6.18888	6.19063	6.19213	6.19021	6.18814	6.18429	6.18018	6.17467	6.16932	6.16451	6.15995	6.15593	6.1525	6.15	6.14657	6.14208	6.13781	6.13373	6.13089	6.12881	6.12791	6.12752	6.12753	6.12767	6.12811
11	5	6.16209	6.0937	6.02773	5.99071	5.95803	5.94928	5.93872	5.92214	5.90795	5.89914	5.89269	5.89004	5.88854	5.88838	5.88707	5.88477	5.88146	5.87751	5.87232	5.86656	5.86144	5.85651	5.85187	5.84729	5.84239	5.83746	5.83009	5.82262	5.8139	5.80499	5.79512	5.78498	5.77396	5.76284	5.75149	5.7402	5.72901	5.71698	5.70395	5.69081	5.67755	5.66462	5.65189	5.64224	5.63396	5.62569	5.61742	5.60791
11	6	5.40498	5.4216	5.43837	5.45701	5.47587	5.49602	5.51456	5.52774	5.53746	5.53939	5.53792	5.53102	5.52289	5.51331	5.50003	5.48359	5.4649	5.44482	5.4277	5.41191	5.39915	5.38729	5.37573	5.36422	5.34569	5.32659	5.31321	5.30021	5.29173	5.28455	5.28455	5.28404	5.28184	5.279	5.27474	5.26914	5.26138	5.25661	5.25535	5.25612	5.25862	5.26389	5.27089	5.26742	5.25929	5.25072	5.24202	5.23671
[truncated: 78 more columns]

## Sheet: TeTX3.xls
Session	Step	1	2	3	4	5	6	7	8	9	10	11	12	13	14	15	16	17	18	19	20	21	22	23	24	25	26	27	28	29	30	31	32	33	34	35	36	37	38	39	40	41	42	43	44	45	46	47	48
1	1	5.2934	5.30043	5.30641	5.3056	5.30521	5.30598	5.30626	5.30581	5.30522	5.30453	5.30554	5.30739	5.31094	5.31489	5.31901	5.3233	5.32944	5.33664	5.34788	5.35922	5.37077	5.38296	5.39583	5.40838	5.42074	5.43213	5.44318	5.45415	5.46511	5.47587	5.48627	5.49461	5.50233	5.50845	5.51487	5.52171	5.5285	5.53523	5.5402	5.54435	5.5484	5.55244	5.56022	5.56856	5.58073	5.59378	5.60985	5.63105
1	2	4.98984	4.99873	5.00818	5.02117	5.03465	5.04947	5.06459	5.08018	5.09596	5.1119	5.12779	5.14365	5.15927	5.17484	5.19102	5.20701	5.22009	5.23282	5.24427	5.2556	5.26673	5.27799	5.28938	5.3005	5.31144	5.32813	5.34677	5.37658	5.40784	5.43528	5.46289	5.49153	5.52154	5.555	5.58997	5.62704	5.66419	5.70139	5.73189	5.75933	5.78264	5.80504	5.82858	5.85153	5.86797	5.88213	5.88838	5.89281
1	3	5.26736	5.27936	5.29149	5.30443	5.31726	5.32983	5.33964	5.34535	5.34838	5.34909	5.3491	5.34877	5.34705	5.34498	5.34017	5.33509	5.32898	5.32241	5.31414	5.30483	5.29356	5.28452	5.27794	5.2734	5.27015	5.26712	5.26416	5.26121	5.25827	5.25515	5.25161	5.24568	5.23931	5.2318	5.22489	5.21879	5.2153	5.21392	5.21567	5.21884	5.22567	5.2333	5.24777	5.26348	5.28855	5.31444	5.3432	5.37295
1	4	4.95906	4.9328	4.90944	4.90483	4.90471	4.91685	4.92878	4.94041	4.9487	4.95412	4.95745	4.95977	4.96266	4.96569	4.97328	4.98116	4.98904	4.99582	4.99842	4.99818	4.9925	4.99027	4.99179	4.99327	4.99472	4.989	4.98083	4.96598	4.95022	4.93446	4.9187	4.90294	4.88829	4.87643	4.87143	4.87599	4.87796	4.87782	4.87631	4.87416	4.8788	4.88493	4.8984	4.91178	4.92063	4.92927	4.93715	4.94503
1	5	6.4502	6.45901	6.46871	6.48417	6.50022	6.51792	6.53466	6.54996	6.56302	6.57417	6.58373	6.59251	6.59983	6.6068	6.60432	6.60124	6.59831	6.59339	6.58099	6.56813	6.5544	6.54023	6.52559	6.50829	6.4893	6.46551	6.44009	6.411	6.38143	6.35319	6.32544	6.30051	6.2731	6.23945	6.20461	6.16811	6.13369	6.10095	6.07239	6.04573	6.01682	5.98742	5.95267	5.91846	5.89216	5.86863	5.8547	5.84232
1	6	6.06387	6.06497	6.06607	6.06717	6.06996	6.07734	6.08574	6.09564	6.1027	6.1073	6.10739	6.10529	6.10309	6.10088	6.1007	6.10067	6.1009	6.10131	6.10237	6.10348	6.10473	6.10513	6.10462	6.10332	6.10153	6.09977	6.09802	6.09678	6.09563	6.09522	6.09558	6.10029	6.10549	6.11195	6.11761	6.12214	6.12609	6.12957	6.13272	6.13571	6.13849	6.14123	6.14406	6.14693	6.15027	6.15367	6.15726	6.16002
2	1	5.06024	5.05488	5.05036	5.05128	5.05322	5.05795	5.06347	5.07016	5.07746	5.08529	5.09237	5.09907	5.10239	5.10491	5.10528	5.10539	5.10382	5.10199	5.09914	5.0956	5.09075	5.08674	5.08367	5.08269	5.08303	5.08594	5.08973	5.09581	5.10221	5.10932	5.11625	5.1221	5.12765	5.13242	5.13631	5.13899	5.13996	5.13954	5.13816	5.13633	5.13472	5.13315	5.13206	5.13094	5.12943	5.12783	5.12587	5.1244
2	2	4.89764	4.90432	4.91071	4.91524	4.91946	4.92286	4.92623	4.92957	4.9322	4.9342	4.93511	4.9355	4.93609	4.93673	4.93689	4.93687	4.93508	4.93345	4.93241	4.93125	4.92987	4.92839	4.92681	4.92539	4.92409	4.92286	4.92166	4.92012	4.91853	4.91684	4.91521	4.91396	4.91321	4.91372	4.91407	4.91422	4.91486	4.91592	4.91769	4.91978	4.92213	4.92454	4.92761	4.93094	4.93666	4.94298	4.95133	4.96065
2	3	6.32385	6.33308	6.3422	6.35065	6.35911	6.36757	6.37613	6.38484	6.39314	6.40109	6.40816	6.41481	6.42076	6.42654	6.43088	6.43535	6.44267	6.45199	6.46891	6.48531	6.50072	6.51542	6.52933	6.54256	6.55534	6.56737	6.57914	6.59049	6.60177	6.61202	6.6204	6.61814	6.61514	6.61031	6.60478	6.59828	6.59064	6.58208	6.57451	6.56739	6.561	6.55477	6.54753	6.54027	6.53332	6.52651	6.52022	6.51361
2	4	5.05815	5.06455	5.07299	5.09461	5.11719	5.14238	5.16851	5.19606	5.22385	5.25185	5.27981	5.30776	5.33727	5.36715	5.39624	5.42496	5.44981	5.47457	5.49897	5.5181	5.52713	5.5175	5.48745	5.44464	5.39375	5.34579	5.29884	5.24996	5.20032	5.11729	5.03815	4.98114	4.93351	4.90954	4.88596	4.86289	4.83249	4.79615	4.74574	4.68891	4.61608	4.53976	4.45455	4.36918	4.28634	4.20251	4.11523	4.03031
2	5	4.4689	4.54427	4.61751	4.677	4.73205	4.77497	4.81403	4.84736	4.87561	4.8995	4.91473	4.92574	4.92787	4.92787	4.92771	4.92731	4.92403	4.91993	4.91275	4.90359	4.89063	4.87771	4.86484	4.85389	4.84417	4.84361	4.84616	4.86611	4.88858	4.92131	4.95589	5.00111	5.04633	5.09155	5.13677	5.18199	5.22721	5.27244	5.31521	5.35686	5.39231	5.4264	5.44879	5.4691	5.47381	5.47499	5.46395	5.45229
2	6	5.58435	5.59509	5.60591	5.61726	5.62902	5.64188	5.65555	5.6704	5.68632	5.70316	5.71987	5.73652	5.75082	5.76455	5.77884	5.79421	5.82248	5.84897	5.8687	5.88293	5.88664	5.8872	5.8843	5.87984	5.87439	5.86602	5.85666	5.84276	5.82821	5.81045	5.79117	5.76324	5.7346	5.70418	5.67228	5.63833	5.61422	5.59809	5.59315	5.59331	5.59887	5.60563	5.6124	5.61908	5.62475	5.62974	5.63238	5.63769
2	7	5.85366	5.80706	5.76162	5.72361	5.68743	5.65624	5.62634	5.59835	5.5748	5.55507	5.54414	5.53749	5.53787	5.53993	5.54123	5.54241	5.54266	5.54274	5.54217	5.541	5.53871	5.5351	5.53006	5.52273	5.51395	5.50317	5.49171	5.47981	5.46785	5.45594	5.44415	5.43294	5.42705	5.43455	5.45207	5.48354	5.51902	5.55775	5.59659	5.63548	5.67395	5.71232	5.75041	5.78788	5.81929	5.8443	5.8471	5.84716
3	1	4.99695	5.02795	5.05877	5.0884	5.11765	5.14588	5.17281	5.19779	5.22226	5.24628	5.26975	5.29295	5.31635	5.33979	5.36291	5.38596	5.4086	5.43076	5.45111	5.47138	5.49153	5.51164	5.53172	5.5522	5.57295	5.59067	5.60736	5.62146	5.63517	5.64699	5.6588	5.67055	5.68226	5.69388	5.70526	5.7163	5.72687	5.73706	5.74696	5.75671	5.7666	5.77652	5.78766	5.79892	5.81079	5.8227	5.83474	5.84646
3	2	5.08841	5.10207	5.11385	5.1135	5.10959	5.09602	5.08581	5.08056	5.07563	5.07097	5.06663	5.06244	5.05718	5.05166	5.05009	5.04904	5.05143	5.05486	5.06222	5.06944	5.07639	5.08319	5.08982	5.09626	5.10258	5.10925	5.11603	5.12294	5.12984	5.13547	5.14106	5.14644	5.15188	5.15749	5.16413	5.17221	5.1809	5.19008	5.20012	5.21056	5.22392	5.23792	5.25366	5.26971	5.28807	5.3081	5.33396	5.35972
3	3	5.74463	5.75408	5.76317	5.76999	5.77614	5.78048	5.78524	5.79064	5.79561	5.80019	5.80422	5.80798	5.80994	5.81146	5.81307	5.8147	5.81646	5.81842	5.82111	5.82364	5.82589	5.82793	5.82975	5.83095	5.83176	5.83293	5.83424	5.83591	5.83763	5.83997	5.84207	5.84283	5.84336	5.84334	5.84378	5.84488	5.84641	5.84828	5.85045	5.85275	5.85505	5.85734	5.85978	5.86227	5.86512	5.86829	5.87256	5.87669
3	4	5.75868	5.76179	5.76577	5.77539	5.78669	5.80258	5.81939	5.83756	5.85615	5.87509	5.89442	5.91392	5.93135	5.94827	5.96476	5.98117	5.99691	6.01164	6.0225	6.03158	6.03728	6.04114	6.04298	6.04427	6.04521	6.04456	6.04337	6.04159	6.03981	6.04392	6.04821	6.0535	6.05918	6.06587	6.07441	6.08554	6.09698	6.10868	6.12098	6.13355	6.14861	6.16421	6.18118	6.1982	6.21506	6.23099	6.2437	6.25511
3	5	5.13821	5.14931	5.1599	5.16725	5.17363	5.17738	5.18113	5.18486	5.18757	5.18939	5.19007	5.1902	5.18998	5.18969	5.18856	5.1873	5.18523	5.18266	5.1782	5.17359	5.1687	5.16351	5.15799	5.15043	5.14158	5.1305	5.11866	5.10521	5.09156	5.0792	5.06707	5.05635	5.04589	5.03613	5.02629	5.01634	5.00853	5.00244	4.99836	4.99519	4.99553	4.99663	5.01806	5.04166	5.07755	5.1164	5.16552	5.21511
3	6	5.05404	5.11982	5.18381	5.23624	5.2852	5.32471	5.36143	5.39403	5.42474	5.45382	5.48018	5.50521	5.51364	5.51807	5.51606	5.51322	5.5051	5.49635	5.48519	5.4741	5.46315	5.45274	5.44292	5.43911	5.43911	5.4404	5.44213	5.44696	5.45248	5.47654	5.50204	5.53569	5.57072	5.60921	5.64506	5.67721	5.70916	5.74094	5.77381	5.80718	5.84856	5.89169	5.93433	5.97661	6.01544	6.05062	6.07315	6.09377
3	7	5.91935	5.9309	5.94197	5.94998	5.95706	5.9616	5.96478	5.96594	5.96676	5.9673	5.96748	5.96748	5.96748	5.96748	5.97472	5.98286	5.99637	6.00887	6.01754	6.02586	6.03352	6.04083	6.04777	6.0547	6.06163	6.06856	6.07549	6.08174	6.08781	6.08781	6.08733	6.0841	6.08037	6.0754	6.07106	6.0676	6.06475	6.0624	6.05992	6.05738	6.05123	6.0443	6.03737	6.03044	6.02351	6.01658	6.00964	6.00271
4	1	4.82077	4.88658	4.94655	4.96889	4.98384	4.97868	4.97503	4.9736	4.96808	4.95903	4.94567	4.9302	4.90957	4.8877	4.87114	4.85545	4.8464	4.83823	4.83343	4.82856	4.82358	4.81873	4.81403	4.81121	4.80957	4.81081	4.81302	4.81456	4.81601	4.81669	4.81728	4.81736	4.81731	4.81689	4.81615	4.81496	4.81345	4.81167	4.80954	4.80724	4.80526	4.80335	4.8023	4.80134	4.80075	4.80012	4.7994	4.79899
4	2	5.13415	5.15041	5.16602	5.17749	5.18834	5.19752	5.208	5.2204	5.23009	5.23743	5.24339	5.24867	5.25293	5.25693	5.25857	5.25965	5.25582	5.25091	5.24194	5.23071	5.21518	5.19583	5.17229	5.14749	5.12188	5.09569	5.06931	5.0397	5.00973	4.98497	4.96085	4.9403	4.92087	4.90424	4.89668	4.90175	4.91126	4.92438	4.94135	4.96008	4.98451	5.01019	5.03791	5.0659	5.09575	5.12619	5.15866	5.18554
4	3	5.25407	5.26632	5.27845	5.28975	5.30086	5.31146	5.32193	5.33223	5.34271	5.35333	5.36421	5.37521	5.3866	5.39808	5.41166	5.42537	5.43906	5.45278	5.46664	5.48071	5.49518	5.5101	5.52548	5.5408	5.55607	5.5709	5.58558	5.59602	5.60585	5.61405	5.62204	5.62887	5.63533	5.64083	5.64576	5.6499	5.65273	5.6545	5.6544	5.65344	5.6498	5.64557	5.6407	5.63575	5.63039	5.62494	5.61923	5.61336
4	4	5.05285	5.08083	5.1088	5.13676	5.16468	5.19254	5.22028	5.24784	5.27497	5.30174	5.32833	5.35485	5.38126	5.40764	5.43226	5.45665	5.47957	5.50208	5.52305	5.54286	5.56045	5.57641	5.59059	5.60348	5.61555	5.62613	5.63622	5.64356	5.65049	5.65431	5.65766	5.65828	5.65764	5.6538	5.65204	5.65318	5.66044	5.67266	5.69261	5.71609	5.72919	5.74002	5.75288	5.76604	5.78141	5.7976	5.81664	5.83763
4	5	4.95895	4.94867	4.94054	4.94634	4.95579	4.97517	4.99922	5.03019	5.05302	5.06885	5.08762	5.10782	5.13696	5.16824	5.20287	5.23753	5.26987	5.30107	5.32792	5.35017	5.3636	5.37919	5.39716	5.41723	5.43864	5.46249	5.48717	5.51185	5.53644	5.55549	5.57395	5.58901	5.6033	5.61564	5.62798	5.64032	5.65403	5.66887	5.68538	5.70267	5.71381	5.72361	5.72763	5.73139	5.73526	5.74103	5.75336	5.7657
5	1	5.15089	5.10133	5.05482	5.02803	5.00551	4.9946	4.98518	4.97793	4.97348	4.97142	4.97225	4.9745	4.98023	4.98679	4.9914	4.99585	4.9999	5.00378	5.00697	5.00945	5.01058	5.01171	5.01283	5.01386	5.01483	5.01566	5.01643	5.01686	5.01725	5.01747	5.01768	5.01781	5.01794	5.01806	5.01817	5.01824	5.01748	5.01604	5.01341	5.01025	5.00783	5.00558	5.00379	5.00206	5.00074	4.99956	4.99882	4.99831
5	2	5.50102	5.52902	5.55321	5.55284	5.54776	5.52986	5.51358	5.49968	5.48424	5.46746	5.44737	5.42566	5.39907	5.37131	5.34045	5.30957	5.2809	5.25251	5.22512	5.19755	5.16962	5.13815	5.10282	5.06779	5.03296	5.00001	4.9677	4.93528	4.9029	4.87339	4.84434	4.81785	4.79258	4.77036	4.74987	4.73181	4.7158	4.70145	4.68979	4.67937	4.67386	4.66942	4.66698	4.66482	4.66449	4.66474	4.66702	4.66915
5	3	5.98679	5.99032	5.98988	5.96386	5.9338	5.89275	5.85832	5.8337	5.81707	5.8073	5.80026	5.79454	5.78957	5.78479	5.78273	5.78158	5.78939	5.79735	5.80587	5.80848	5.79981	5.79114	5.78247	5.76783	5.7494	5.72169	5.69082	5.66204	5.63362	5.60992	5.58704	5.56877	5.55286	5.54295	5.53304	5.52313	5.50789	5.48833	5.46189	5.43231	5.41989	5.41122	5.3915	5.37075	5.34473	5.31872	5.2927	5.26669
5	4	5.26728	5.29915	5.33088	5.36176	5.39248	5.42281	5.4533	5.48403	5.51662	5.55082	5.5842	5.61718	5.64785	5.67795	5.70554	5.73285	5.75875	5.78432	5.80866	5.83226	5.85446	5.87615	5.89728	5.91707	5.93601	5.95285	5.96897	5.9799	5.99016	6.00249	6.01497	6.02824	6.04133	6.05396	6.0663	6.07824	6.08988	6.1013	6.11284	6.12445	6.14441	6.16621	6.18812	6.20997	6.23125	6.2521	6.27148	6.288
5	5	5.70224	5.70545	5.70906	5.71517	5.72189	5.73026	5.73915	5.74883	5.75786	5.76634	5.77369	5.7805	5.78568	5.79047	5.79217	5.79358	5.79383	5.79388	5.79323	5.79239	5.79122	5.78881	5.78506	5.77984	5.77368	5.76571	5.7571	5.7478	5.73842	5.7307	5.72384	5.72188	5.72403	5.73655	5.74725	5.7554	5.76236	5.76834	5.77311	5.77732	5.78067	5.78383	5.80532	5.82841	5.85897	5.88869	5.9155	5.93974
5	6	5.86077	5.88159	5.9015	5.9156	5.92864	5.93881	5.9497	5.96164	5.97229	5.98182	5.99093	5.99984	6.00874	6.01763	6.02976	6.04212	6.05489	6.06761	6.0801	6.09198	6.10267	6.11331	6.12387	6.13467	6.14561	6.15696	6.16844	6.18012	6.1918	6.20129	6.2107	6.21965	6.22919	6.24019	6.2522	6.26561	6.27894	6.29222	6.30504	6.31765	6.32984	6.34193	6.35736	6.37302	6.38937	6.40514	6.41887	6.43256
6	1	4.47358	4.48413	4.49473	4.50559	4.51658	4.52796	4.54078	4.55573	4.57155	4.58811	4.60649	4.62575	4.64475	4.66367	4.68223	4.70078	4.71959	4.73865	4.75862	4.78016	4.80469	4.82785	4.8495	4.86978	4.88918	4.90641	4.92291	4.93973	4.95663	4.97496	4.99463	5.02192	5.0505	5.08231	5.11209	5.13902	5.16637	5.19406	5.22256	5.25142	5.27984	5.30815	5.336	5.36364	5.38931	5.4132	5.43097	5.44576
6	2	4.88313	4.90555	4.92639	4.93708	4.94538	4.94717	4.94846	4.94899	4.94733	4.94377	4.9388	4.93313	4.92643	4.91947	4.91133	4.90333	4.89804	4.89356	4.89215	4.89094	4.8901	4.88937	4.88875	4.88817	4.88761	4.88667	4.8856	4.88458	4.88356	4.88245	4.88129	4.87992	4.87893	4.87892	4.87874	4.87832	4.87755	4.87651	4.87581	4.87527	4.87424	4.87309	4.87158	4.87005	4.86852	4.86736	4.86747	4.86782
6	3	4.66906	4.67784	4.6871	4.69941	4.71239	4.72724	4.74195	4.75647	4.77099	4.78551	4.79965	4.8136	4.82647	4.83908	4.85031	4.86149	4.87314	4.88498	4.89757	4.911	4.92606	4.94312	4.96238	4.98502	5.00979	5.04424	5.08199	5.11853	5.15496	5.1946	5.23541	5.28299	5.33318	5.39001	5.44407	5.49425	5.53918	5.57986	5.60965	5.63448	5.65931	5.68413	5.70593	5.72639	5.73467	5.74011	5.73571	5.73193
6	4	5.23253	5.23533	5.23847	5.2438	5.24956	5.25646	5.26264	5.26776	5.27297	5.27825	5.283	5.28749	5.29033	5.29277	5.29478	5.29634	5.29275	5.28778	5.27757	5.27039	5.26903	5.26741	5.2655	5.26535	5.26633	5.27917	5.29604	5.31774	5.3402	5.3699	5.40135	5.44272	5.48201	5.51599	5.55123	5.5882	5.62722	5.6679	5.69769	5.72252	5.74316	5.76288	5.77957	5.79612	5.81268	5.82923	5.84578	5.86233
6	5	5.36828	5.38153	5.39432	5.40405	5.41342	5.42181	5.43112	5.4418	5.4523	5.46265	5.47395	5.48571	5.4973	5.50885	5.52501	5.54089	5.54971	5.55863	5.56789	5.57528	5.57909	5.58239	5.58511	5.5827	5.57703	5.57519	5.57465	5.56835	5.56125	5.55308	5.54484	5.53623	5.52899	5.52517	5.51981	5.5123	5.50737	5.50453	5.50043	5.49575	5.49142	5.48717	5.47845	5.46889	5.45298	5.43708	5.42117	5.40593
6	6	5.45102	5.45627	5.46144	5.46619	5.47077	5.4749	5.4786	5.48168	5.48441	5.48684	5.48858	5.48998	5.49328	5.49704	5.50068	5.50406	5.50448	5.50503	5.50604	5.50713	5.5084	5.50935	5.50996	5.5128	5.51705	5.52366	5.53107	5.55664	5.58464	5.61078	5.63643	5.65927	5.68368	5.71207	5.74192	5.7738	5.80898	5.84684	5.88082	5.91305	5.94021	5.96627	5.97467	5.98267	5.99499	6.00783	6.02245	6.03454
6	7	5.15834	5.19216	5.22567	5.25715	5.28814	5.31781	5.34707	5.37572	5.40368	5.43105	5.4583	5.48548	5.51266	5.53983	5.56076	5.58133	5.60249	5.62345	5.64365	5.6623	5.67799	5.69299	5.70725	5.72054	5.73321	5.7446	5.75555	5.76545	5.77519	5.78353	5.79178	5.79944	5.8072	5.81516	5.8222	5.82796	5.83371	5.83945	5.84542	5.8515	5.85643	5.86111	5.86535	5.86945	5.87237	5.87466	5.87473	5.87369
7	1	5.64429	5.65753	5.67053	5.68205	5.6933	5.70385	5.71514	5.7275	5.74061	5.75435	5.76827	5.78227	5.79576	5.80912	5.82236	5.83556	5.84841	5.86117	5.87359	5.88618	5.89911	5.91172	5.92399	5.93578	5.94727	5.9576	5.96753	5.97866	5.98996	6.00244	6.01515	6.02917	6.04386	6.06024	6.07644	6.09237	6.10785	6.12297	6.13843	6.15405	6.16915	6.18414	6.19804	6.2116	6.22228	6.23218	6.23941	6.24585
7	2	5.74564	5.78345	5.82085	5.8556	5.88965	5.92184	5.95336	5.9839	6.01295	6.04072	6.06654	6.0914	6.11272	6.1332	6.14891	6.16414	6.17716	6.18971	6.20044	6.20713	6.20606	6.20359	6.19958	6.19356	6.18627	6.17431	6.16077	6.14476	6.1284	6.11015	6.09161	6.07134	6.05087	6.02988	6.0091	5.98861	5.96849	5.94867	5.92906	5.90955	5.89293	5.87694	5.86394	5.85145	5.8426	5.8339	5.82578	5.81839
7	3	5.59146	5.59033	5.58884	5.58515	5.58086	5.57495	5.5683	5.56055	5.55293	5.54544	5.53703	5.52819	5.51659	5.50432	5.49015	5.47603	5.46402	5.45275	5.4443	5.44178	5.4506	5.4565	5.4592	5.45944	5.45812	5.45724	5.45651	5.45827	5.46041	5.46614	5.47272	5.48415	5.49513	5.50497	5.51149	5.51336	5.51014	5.50277	5.48923	5.47287	5.46153	5.45129	5.44677	5.44335	5.44831	5.45233	5.45307	5.45294
7	4	5.58943	5.60885	5.62838	5.64861	5.66898	5.68972	5.71026	5.73051	5.75017	5.76933	5.78802	5.80649	5.82444	5.84227	5.85632	5.86958	5.87602	5.88066	5.87848	5.87271	5.86003	5.84592	5.83023	5.81278	5.79421	5.77262	5.75	5.72351	5.69645	5.66605	5.63505	5.60065	5.56607	5.53108	5.49739	5.46553	5.43556	5.40713	5.37538	5.34211	5.30916	5.27628	5.24409	5.21211	5.18193	5.15238	5.12496	5.09839
7	5	6.05183	6.05208	6.05393	6.06606	6.08049	6.1012	6.12145	6.14101	6.14354	6.1314	6.11018	6.08452	6.0562	6.02723	5.99476	5.96156	5.92213	5.88104	5.83364	5.78106	5.71857	5.66929	5.63444	5.61134	5.59567	5.58154	5.56794	5.5358	5.50105	5.45944	5.41793	5.37689	5.33749	5.30223	5.26703	5.23191	5.19642	5.16063	5.12439	5.08794	5.05683	5.02687	5.00159	4.97686	4.95546	4.93328	4.90842	4.88317
7	6	4.02195	4.04769	4.07413	4.10508	4.13649	4.16915	4.19684	4.21719	4.23563	4.25243	4.26832	4.28377	4.29921	4.31465	4.32497	4.3346	4.33968	4.34371	4.34374	4.3442	4.34548	4.3485	4.3534	4.35904	4.36514	4.36669	4.36669	4.36669	4.36669	4.36669	4.36669	4.36669	4.36534	4.36057	4.35596	4.35158	4.34787	4.3447	4.3437	4.3437	4.3437	4.3437	4.34461	4.34592	4.35089	4.3591	4.37857	4.40048
8	1	4.91697	4.93135	4.94595	4.96189	4.97813	4.99518	5.01245	5.03007	5.04849	5.0676	5.08719	5.10701	5.12685	5.14669	5.16436	5.18192	5.2	5.21826	5.23719	5.25638	5.27606	5.29428	5.31089	5.32623	5.34076	5.35558	5.37051	5.38782	5.40552	5.42784	5.45026	5.47325	5.49656	5.52069	5.546	5.57296	5.59123	5.60245	5.61117	5.61876	5.62554	5.63216	5.63938	5.64648	5.65195	5.65649	5.6578	5.65725
8	2	5.44411	5.44331	5.44275	5.44372	5.44489	5.44663	5.44808	5.44912	5.45043	5.45196	5.4532	5.45428	5.4549	5.45541	5.45529	5.45511	5.45463	5.45405	5.45308	5.45291	5.45424	5.47642	5.5214	5.56795	5.61549	5.66285	5.71014	5.7549	5.79935	5.84545	5.89157	5.93779	5.98048	6.01425	6.02999	6.02061	6.01828	6.02167	6.02781	6.03522	6.04235	6.04943	6.04079	6.03205	6.02976	6.0296	6.03687	6.04805
8	3	5.82012	5.82096	5.82048	5.81155	5.80127	5.78728	5.77399	5.76171	5.75129	5.74247	5.73403	5.72578	5.71723	5.70861	5.69745	5.68627	5.67693	5.6686	5.6641	5.66138	5.6621	5.65882	5.65118	5.63812	5.62164	5.60179	5.58081	5.55875	5.53651	5.51206	5.48759	5.46294	5.43821	5.4133	5.38814	5.36264	5.33798	5.314	5.2911	5.26869	5.24917	5.23027	5.22604	5.22509	5.25053	5.27761	5.3104	5.34199
8	4	5.56515	5.57585	5.58724	5.60314	5.62	5.63943	5.65941	5.68021	5.69897	5.71596	5.73898	5.76495	5.79745	5.83151	5.86449	5.89678	5.92145	5.94398	5.95842	5.96881	5.97144	5.96688	5.95446	5.93759	5.91791	5.8929	5.86609	5.83215	5.79716	5.75678	5.71638	5.67586	5.63588	5.59726	5.56127	5.52894	5.50486	5.48747	5.47699	5.46967	5.47142	5.47516	5.50054	5.52694	5.55334	5.5811	5.61358	5.64941
8	5	4.92175	4.95746	4.99298	5.02734	5.06133	5.09431	5.12664	5.15798	5.18805	5.217	5.24371	5.26932	5.29193	5.31381	5.33089	5.34733	5.35981	5.37171	5.38144	5.39045	5.39808	5.40627	5.41507	5.42334	5.43126	5.43882	5.44626	5.45352	5.4609	5.47883	5.49707	5.51712	5.53748	5.55866	5.57981	5.60094	5.62124	5.64088	5.65846	5.6751	5.68892	5.70213	5.7115	5.71995	5.72105	5.71989	5.71094	5.6978
9	1	4.91463	4.9361	4.9573	4.97685	4.99608	5.0144	5.03247	5.05016	5.06776	5.08529	5.10282	5.12035	5.13756	5.15469	5.1713	5.18794	5.20554	5.2228	5.23875	5.25121	5.25701	5.26136	5.26412	5.2662	5.26783	5.26958	5.27138	5.27342	5.27548	5.27652	5.27783	5.28071	5.28674	5.30071	5.31498	5.32969	5.34444	5.35923	5.37291	5.38609	5.39603	5.40526	5.41435	5.4235	5.43338	5.44441	5.45947	5.47796
9	2	5.78455	5.76092	5.73747	5.71525	5.69408	5.67574	5.65986	5.64761	5.64017	5.63688	5.64251	5.65251	5.67259	5.6951	5.72153	5.74836	5.77694	5.80563	5.83474	5.86342	5.89131	5.91454	5.93268	5.95088	5.96911	5.98988	6.01152	6.0328	6.05402	6.07382	6.09389	6.11553	6.13749	6.16031	6.18358	6.20749	6.23134	6.25514	6.27421	6.29112	6.3071	6.32288	6.33848	6.35405	6.36949	6.38487	6.40002	6.41462
9	3	5.69817	5.71741	5.73659	5.75535	5.77399	5.79227	5.80516	5.81005	5.80223	5.78347	5.75417	5.71973	5.68312	5.64599	5.61054	5.57656	5.55932	5.54278	5.52883	5.5191	5.51745	5.52796	5.55177	5.59335	5.6462	5.69638	5.74565	5.7763	5.8042	5.81735	5.83034	5.84238	5.85605	5.87381	5.89202	5.91087	5.91382	5.90389	5.9094	5.92197	5.93904	5.9571	5.97484	5.99233	6.00739	6.02171	6.03343	6.04406
9	4	5.2439	5.25163	5.2592	5.26576	5.27239	5.27921	5.28649	5.29446	5.30225	5.3099	5.31742	5.32489	5.33466	5.345	5.36092	5.37757	5.39887	5.41959	5.43812	5.45564	5.47122	5.48728	5.50387	5.52135	5.53939	5.55813	5.57712	5.5914	5.60502	5.61749	5.63152	5.65442	5.67906	5.70808	5.73752	5.76757	5.7987	5.83071	5.86245	5.89406	5.9254	5.95667	5.9862	6.01482	6.03494	6.0538	6.06825	6.08197
9	5	5.62398	5.63443	5.64549	5.66056	5.67591	5.69204	5.70782	5.72307	5.73828	5.75346	5.7678	5.78174	5.79344	5.80461	5.81434	5.82381	5.83129	5.8381	5.84236	5.84577	5.84758	5.84969	5.85212	5.85513	5.85851	5.86227	5.86616	5.86949	5.87275	5.87546	5.87828	5.88171	5.88532	5.88937	5.89298	5.896	5.89774	5.89845	5.89924	5.90006	5.9009	5.90174	5.90219	5.90256	5.90229	5.90181	5.90066	5.89929
9	6	5.53455	5.48329	5.43332	5.39168	5.3527	5.32099	5.29091	5.26323	5.24382	5.23153	5.22829	5.22949	5.23046	5.23137	5.22926	5.22682	5.22279	5.21841	5.21265	5.20607	5.1979	5.18738	5.17429	5.161	5.14758	5.13466	5.12189	5.10755	5.09296	5.0765	5.06015	5.04442	5.03042	5.02081	5.02634	5.05299	5.07357	5.08926	5.11556	5.14672	5.15766	5.16419	5.18268	5.20058	5.20689	5.21023	5.20331	5.19887
9	7	5.55892	5.5771	5.59492	5.61044	5.62542	5.63891	5.65182	5.66387	5.67396	5.68236	5.6882	5.69277	5.69541	5.69759	5.69711	5.69623	5.69235	5.68766	5.6799	5.67175	5.66283	5.65382	5.6447	5.63595	5.62744	5.6192	5.61107	5.6044	5.59798	5.59481	5.59226	5.59326	5.59552	5.60097	5.60728	5.61479	5.62389	5.63428	5.64595	5.65821	5.67142	5.68484	5.6993	5.71364	5.72626	5.7383	5.74835	5.75822
9	8	5.75102	5.76522	5.7801	5.7993	5.81851	5.83777	5.85673	5.87522	5.89411	5.91335	5.93288	5.95256	5.97123	5.98967	6.00685	6.02389	6.0403	6.05631	6.07076	6.08448	6.09679	6.10942	6.12241	6.13491	6.14711	6.15826	6.16905	6.17971	6.19037	6.20218	6.21416	6.22706	6.23986	6.25242	6.26375	6.27337	6.2824	6.29095	6.29982	6.30884	6.31624	6.32329	6.3277	6.3321	6.33778	6.34398	6.35197	6.35975
10	1	5.27236	5.28048	5.28862	5.29688	5.30518	5.3136	5.32155	5.32882	5.33551	5.34172	5.34703	5.3519	5.35536	5.35849	5.36156	5.36464	5.36791	5.37104	5.37367	5.37598	5.37769	5.37865	5.37878	5.37891	5.37904	5.37932	5.37965	5.38042	5.38125	5.38222	5.38315	5.38391	5.38445	5.38445	5.38413	5.38339	5.38238	5.38117	5.37944	5.37748	5.37912	5.38156	5.38629	5.3913	5.39801	5.40511	5.4136	5.42267
10	2	5.3504	5.35506	5.3598	5.36503	5.37044	5.37631	5.38183	5.38682	5.39133	5.39544	5.3988	5.4018	5.40404	5.4061	5.40777	5.40938	5.41051	5.41161	5.41252	5.41342	5.41426	5.41507	5.41584	5.41614	5.41614	5.41652	5.41703	5.41897	5.42109	5.42223	5.42333	5.42424	5.42521	5.42631	5.42719	5.42774	5.42886	5.43045	5.43534	5.44174	5.44978	5.45819	5.46793	5.47794	5.49011	5.50365	5.52193	5.5419
10	3	5.24085	5.24916	5.25756	5.26651	5.27565	5.2853	5.29447	5.30293	5.31073	5.31796	5.32415	5.32984	5.33489	5.33979	5.34366	5.34735	5.34957	5.35163	5.35308	5.3548	5.35701	5.36002	5.36392	5.37121	5.38066	5.39165	5.40318	5.41648	5.43007	5.44661	5.46353	5.48271	5.50339	5.52787	5.55475	5.58495	5.61667	5.64961	5.68412	5.71936	5.75337	5.78712	5.82064	5.85438	5.89034	5.92526	5.9566	5.98664
10	4	5.61205	5.64957	5.68443	5.70212	5.71398	5.70996	5.70637	5.70342	5.70104	5.69914	5.69812	5.69753	5.69651	5.69539	5.69277	5.68987	5.68472	5.68567	5.70975	5.73537	5.76397	5.79247	5.82088	5.83369	5.83661	5.83243	5.82584	5.81116	5.79529	5.7729	5.74984	5.72291	5.69378	5.65908	5.62239	5.58295	5.5434	5.50376	5.46836	5.43489	5.4022	5.36967	5.33908	5.30933	5.28725	5.26637	5.24961	5.23448
10	5	5.11585	5.1688	5.21713	5.23575	5.24428	5.22531	5.2145	5.21575	5.21533	5.21347	5.20801	5.20078	5.18978	5.17787	5.17057	5.16419	5.1657	5.16836	5.1754	5.18355	5.19383	5.20628	5.22111	5.22983	5.23467	5.24153	5.24908	5.267	5.28635	5.3081	5.33001	5.35286	5.37602	5.39999	5.42154	5.4397	5.45756	5.47518	5.49716	5.52113	5.53616	5.54923	5.55867	5.56853	5.58451	5.59936	5.61025	5.62011
10	6	6.06952	6.11133	6.15265	6.19083	6.22794	6.26213	6.29674	6.33194	6.36662	6.40087	6.43423	6.46716	6.49555	6.52284	6.54736	6.57142	6.59197	6.61197	6.62984	6.648	6.66673	6.68663	6.70783	6.7265	6.74357	6.76127	6.77918	6.80078	6.82279	6.83884	6.85437	6.86696	6.87813	6.8857	6.89476	6.90589	6.91901	6.93374	6.95446	6.97792	7.00102	7.02403	7.04402	7.06247	7.06667	7.07295	7.08644	7.10196
11	1	6.14329	6.15058	6.15823	6.16824	6.17836	6.18872	6.19818	6.20631	6.21451	6.22279	6.2304	6.23769	6.24406	6.2502	6.25508	6.25992	6.26537	6.27083	6.27627	6.28342	6.29387	6.31049	6.33388	6.36224	6.39375	6.42503	6.45625	6.48666	6.51695	6.5462	6.57607	6.6094	6.64074	6.66704	6.689	6.70491	6.71204	6.71204	6.70972	6.70634	6.7013	6.69591	6.69007	6.68448	6.68156	6.67773	6.67077	6.66506
11	2	5.32825	5.3544	5.38077	5.40851	5.43653	5.46529	5.49423	5.52341	5.55264	5.58191	5.60989	5.63723	5.66221	5.68661	5.70695	5.72665	5.74166	5.75546	5.76466	5.77153	5.77396	5.77228	5.7661	5.75711	5.74635	5.7326	5.71783	5.69922	5.68	5.65545	5.63048	5.60316	5.57663	5.55209	5.52843	5.50601	5.4835	5.46089	5.44085	5.42198	5.40652	5.3918	5.38123	5.3713	5.36593	5.36094	5.35722	5.35394
11	3	5.32215	5.34425	5.36759	5.39893	5.43227	5.47108	5.51224	5.55686	5.5953	5.62843	5.66244	5.69686	5.73206	5.76743	5.80299	5.83844	5.87237	5.90468	5.93087	5.95487	5.97467	5.99242	6.00791	6.02038	6.03094	6.03861	6.0453	6.04849	6.05113	6.04924	6.04702	6.04289	6.04088	6.04426	6.05042	6.06044	6.07234	6.08576	6.10177	6.11897	6.13929	6.16029	6.18465	6.20944	6.23701	6.26437	6.29103	6.31721
11	4	4.45145	4.49588	4.53945	4.57751	4.61407	4.64651	4.67695	4.70443	4.73166	4.75869	4.78316	4.80638	4.82705	4.8471	4.86486	4.88228	4.89725	4.91198	4.92587	4.93926	4.95169	4.96307	4.9733	4.98138	4.98809	4.99372	4.99898	5.00332	5.00753	5.01112	5.01469	5.01815	5.02207	5.02718	5.034	5.04321	5.05748	5.07586	5.09836	5.12275	5.1498	5.17744	5.20723	5.2372	5.2679	5.29851	5.32884	5.359
11	5	5.61951	5.62462	5.62996	5.63677	5.64389	5.65181	5.65994	5.66836	5.67596	5.68285	5.68913	5.69511	5.70063	5.70604	5.71125	5.71637	5.72056	5.72438	5.72677	5.72853	5.72907	5.72866	5.72719	5.72601	5.72503	5.72431	5.72368	5.7231	5.72252	5.72143	5.72039	5.71953	5.71892	5.7189	5.71926	5.72014	5.7216	5.72351	5.72513	5.72662	5.72885	5.73125	5.73422	5.73716	5.73963	5.74185	5.74322	5.7451
11	6	5.57215	5.59765	5.61991	5.62134	5.61949	5.60877	5.59826	5.58808	5.57663	5.56409	5.55117	5.53806	5.52405	5.50983	5.49383	5.47954	5.48772	5.49681	5.50932	5.52308	5.53925	5.55744	5.57784	5.59823	5.61861	5.64214	5.66673	5.69365	5.72087	5.74761	5.77466	5.80353	5.83133	5.85641	5.88071	5.90391	5.92883	5.95514	5.98732	6.02218	6.05918	6.09665	6.13271	6.16782	6.19393	6.21993	6.24553	6.27178
[truncated: 78 more columns]

## Sheet: TeTX4.xls
Session	Step	1	2	3	4	5	6	7	8	9	10	11	12	13	14	15	16	17	18	19	20	21	22	23	24	25	26	27	28	29	30	31	32	33	34	35	36	37	38	39	40	41	42	43	44	45	46	47	48
1	1	5.03862	5.04129	5.04391	5.04641	5.0487	5.051	5.05382	5.05676	5.0598	5.06272	5.06587	5.06973	5.07435	5.07941	5.08569	5.09171	5.09734	5.09943	5.10236	5.11684	5.13747	5.1638	5.18802	5.21193	5.2357	5.25962	5.28363	5.30829	5.33311	5.35818	5.39064	5.42409	5.45158	5.47157	5.48498	5.49963	5.51511	5.53232	5.56749	5.61175	5.65436	5.696	5.73627	5.77426	5.81152	5.84819	5.88503	5.92201
1	2	5.95122	5.94851	5.94935	5.95607	5.96216	5.9689	5.98142	5.99483	6.0091	6.02117	6.03355	6.0477	6.06161	6.07539	6.08966	6.10476	6.12117	6.14169	6.16342	6.18483	6.20527	6.2248	6.2413	6.25786	6.27552	6.29008	6.30296	6.3151	6.3277	6.34097	6.35502	6.36916	6.38256	6.39402	6.40379	6.41503	6.42557	6.43396	6.44276	6.45163	6.45702	6.46505	6.47682	6.48909	6.5014	6.51329	6.52314	6.53128
1	3	6.08894	6.07368	6.0568	6.03725	6.01462	5.99088	5.96656	5.94353	5.92175	5.90147	5.88344	5.87124	5.8569	5.84132	5.82471	5.8069	5.78719	5.76225	5.73453	5.69967	5.65894	5.61279	5.56188	5.51035	5.45861	5.40679	5.35493	5.3026	5.25341	5.20887	5.17013	5.13411	5.10393	5.07549	5.04858	5.02313	4.99805	4.97355	4.94673	4.91826	4.87787	4.83476	4.78782	4.73744	4.68551	4.63039	4.57318	4.51424
1	4	5.09248	5.1185	5.14438	5.17003	5.19527	5.22081	5.24921	5.27783	5.30668	5.3339	5.36179	5.39221	5.42418	5.45709	5.494	5.53085	5.56761	5.60407	5.63962	5.67022	5.69987	5.72866	5.75704	5.782	5.798	5.80776	5.81409	5.8178	5.81858	5.81501	5.80127	5.78385	5.76213	5.73969	5.71662	5.69537	5.67578	5.65991	5.64695	5.63545	5.62332	5.61282	5.60462	5.60274	5.60247	5.60203	5.60135	5.60046
1	5	5.4685	5.47766	5.48683	5.49599	5.5096	5.52469	5.53992	5.55237	5.56213	5.57162	5.58137	5.59196	5.60262	5.61331	5.624	5.63468	5.64537	5.65299	5.65958	5.66565	5.67212	5.67896	5.68592	5.69295	5.70008	5.70724	5.7143	5.71732	5.71989	5.72181	5.72339	5.72486	5.72622	5.72642	5.72559	5.72406	5.72399	5.72779	5.73304	5.73921	5.7499	5.76149	5.77434	5.78816	5.80233	5.81704	5.83194	5.84699
1	6	4.67073	4.67724	4.68374	4.69024	4.69728	4.70456	4.71226	4.71978	4.72712	4.73308	4.73885	4.74463	4.75082	4.75725	4.76386	4.77082	4.77835	4.78704	4.7961	4.80515	4.81465	4.82456	4.83449	4.84474	4.85579	4.8674	4.87931	4.89124	4.90318	4.91515	4.92711	4.93926	4.9524	4.96575	4.97928	4.99342	5.008	5.02351	5.03901	5.05452	5.07008	5.08563	5.10119	5.11491	5.1278	5.13898	5.15112	5.16405
2	1	6.131	6.14256	6.15445	6.16692	6.18001	6.19341	6.20741	6.22158	6.23591	6.25	6.26401	6.2779	6.29175	6.30558	6.31941	6.33257	6.34466	6.35638	6.368	6.37968	6.39132	6.4029	6.41265	6.42209	6.4313	6.44088	6.45066	6.46021	6.46919	6.47731	6.48477	6.49195	6.49861	6.5049	6.51087	6.5162	6.52133	6.5261	6.53049	6.53466	6.53823	6.54159	6.54466	6.54746	6.55012	6.55242	6.55439	6.5561
2	2	5.77278	5.77993	5.78499	5.78657	5.78728	5.788	5.79084	5.79677	5.80573	5.824	5.84308	5.86093	5.87184	5.87853	5.86551	5.85316	5.84184	5.82648	5.80877	5.78438	5.75708	5.72708	5.70412	5.68979	5.69632	5.7041	5.71252	5.71958	5.72655	5.73336	5.74186	5.75039	5.75651	5.76084	5.7636	5.76211	5.75776	5.74732	5.73083	5.71097	5.68419	5.65497	5.62232	5.58574	5.54518	5.49006	5.43795	5.38837
2	3	5.58276	5.59703	5.61154	5.62648	5.64181	5.65734	5.67322	5.68925	5.70542	5.7245	5.74406	5.76386	5.78365	5.80344	5.82348	5.8439	5.8649	5.88516	5.90505	5.9241	5.94256	5.96049	5.97691	5.99252	6.00644	6.01731	6.02643	6.03197	6.03681	6.04062	6.04245	6.04339	6.04249	6.04093	6.03877	6.03602	6.03316	6.03018	6.02661	6.02269	6.0176	6.01184	6.00513	5.99686	5.98781	5.9769	5.96567	5.95415
2	4	5.83937	5.85134	5.86543	5.88303	5.90318	5.92434	5.94671	5.96869	5.99029	6.01419	6.03897	6.06539	6.09285	6.12092	6.14976	6.17831	6.2064	6.23161	6.25562	6.27764	6.29885	6.31931	6.33786	6.35524	6.37012	6.38229	6.39289	6.39978	6.40547	6.40937	6.41089	6.41149	6.41085	6.40972	6.40817	6.40565	6.40226	6.39695	6.39203	6.38736	6.38366	6.38053	6.37819	6.37726	6.37739	6.3809	6.38667	6.3943
2	5	6.35366	6.37209	6.3901	6.40742	6.42278	6.43711	6.44896	6.46074	6.47246	6.48406	6.49513	6.50477	6.51328	6.52114	6.52808	6.53583	6.54482	6.5534	6.56157	6.56803	6.57327	6.57738	6.5808	6.58383	6.58603	6.58845	6.591	6.59401	6.59715	6.60047	6.60386	6.60735	6.61126	6.61646	6.62278	6.63161	6.64091	6.65076	6.66166	6.67312	6.68509	6.69721	6.70954	6.7218	6.73287	6.7382	6.74275	6.74666
2	6	5.24695	5.26265	5.27834	5.29403	5.3097	5.32535	5.34091	5.35628	5.37146	5.38561	5.39965	5.41374	5.42808	5.44257	5.45756	5.47259	5.48768	5.50283	5.51792	5.53259	5.54686	5.56076	5.57414	5.58773	5.60201	5.61652	5.63115	5.64571	5.66009	5.67418	5.6882	5.702	5.71479	5.72752	5.74019	5.75388	5.76868	5.78601	5.80318	5.82026	5.83684	5.85303	5.86868	5.88317	5.89685	5.90798	5.91886	5.92951
3	1	5.1748	5.18282	5.19154	5.20142	5.21376	5.22681	5.23924	5.25164	5.26403	5.27863	5.29347	5.30809	5.32251	5.33679	5.35065	5.36432	5.37769	5.38959	5.40106	5.41257	5.42409	5.43563	5.44539	5.45473	5.46347	5.4711	5.47811	5.48429	5.49026	5.49591	5.50827	5.52244	5.5361	5.54896	5.56111	5.57633	5.59229	5.6093	5.62673	5.64436	5.6612	5.67758	5.69332	5.70826	5.72288	5.737	5.75013	5.76244
3	2	4.7052	4.70371	4.70488	4.71048	4.72551	4.74317	4.75782	4.77187	4.78532	4.8	4.81587	4.83468	4.85662	4.88032	4.90163	4.92285	4.94391	4.96618	4.98847	5.00865	5.02771	5.04573	5.0616	5.07616	5.08786	5.09267	5.09355	5.08644	5.07728	5.06508	5.04099	5.01308	4.98276	4.94983	4.91461	4.87545	4.83547	4.79441	4.75658	4.72051	4.68753	4.65635	4.6277	4.6056	4.58582	4.569	4.55634	4.54713
3	3	5.2378	5.26537	5.29402	5.32449	5.35883	5.39446	5.4302	5.46615	5.50228	5.54163	5.5813	5.62065	5.65967	5.69847	5.73534	5.77173	5.80733	5.83992	5.87106	5.8991	5.92549	5.95034	5.96928	5.98677	6.00224	6.01394	6.02351	6.02979	6.03522	6.0394	6.03966	6.03844	6.03518	6.02955	6.02182	6.0106	5.99857	5.98537	5.97202	5.95866	5.94687	5.936	5.92641	5.91986	5.91454	5.91139	5.91313	5.91896
3	4	6.02226	6.04622	6.06874	6.08888	6.10394	6.11744	6.13159	6.14585	6.16021	6.17387	6.18711	6.1994	6.21068	6.22138	6.23182	6.24204	6.25191	6.2599	6.26704	6.27255	6.27718	6.28101	6.27993	6.27777	6.27427	6.2685	6.26143	6.25188	6.2417	6.23056	6.21955	6.20908	6.20132	6.19688	6.19536	6.19568	6.19663	6.19868	6.20737	6.21948	6.23238	6.24575	6.25978	6.27392	6.28797	6.30141	6.31246	6.32152
3	5	5.05488	5.04949	5.0446	5.04053	5.03822	5.0372	5.04103	5.04595	5.05194	5.05827	5.06467	5.07114	5.0777	5.08431	5.09151	5.09873	5.10598	5.11285	5.11948	5.1254	5.13094	5.13613	5.14152	5.14695	5.15243	5.15799	5.16339	5.16125	5.15719	5.15025	5.14519	5.14122	5.14025	5.14288	5.14869	5.1542	5.15964	5.16497	5.17008	5.17508	5.17979	5.18434	5.18866	5.19244	5.19597	5.199	5.2007	5.20129
3	6	5.29167	5.29204	5.2923	5.29235	5.29199	5.2916	5.29201	5.29265	5.29349	5.29512	5.29676	5.29812	5.29919	5.30008	5.29936	5.29853	5.29755	5.29703	5.29663	5.29607	5.29542	5.29469	5.29527	5.29602	5.2968	5.29736	5.29779	5.29827	5.29877	5.29928	5.30004	5.30085	5.30165	5.30241	5.30314	5.3025	5.30154	5.30015	5.29902	5.29807	5.29828	5.29915	5.30097	5.30381	5.30702	5.31075	5.31533	5.32063
4	1	4.46443	4.51308	4.55676	4.59222	4.61845	4.64144	4.66304	4.68418	4.70487	4.72503	4.74552	4.76712	4.7871	4.80614	4.82397	4.84326	4.86484	4.88466	4.90346	4.91947	4.92997	4.93538	4.93524	4.93301	4.92688	4.91435	4.89825	4.87771	4.85635	4.83377	4.81067	4.78724	4.76285	4.73774	4.71201	4.6839	4.656	4.62921	4.60428	4.58052	4.56193	4.54355	4.52548	4.50948	4.49482	4.48409	4.47804	4.47589
4	2	5.36232	5.38278	5.40186	5.41869	5.43293	5.44613	5.45797	5.46921	5.47987	5.48932	5.49724	5.50129	5.50431	5.50674	5.50744	5.50616	5.50176	5.4951	5.48748	5.47826	5.46851	5.45828	5.44039	5.42029	5.39663	5.37092	5.34406	5.31563	5.28693	5.25784	5.22876	5.1996	5.17007	5.14109	5.1126	5.08703	5.06637	5.05729	5.05409	5.05428	5.06425	5.07754	5.09549	5.11669	5.13951	5.16614	5.19537	5.22676
4	3	5.41057	5.4042	5.40002	5.39948	5.40301	5.40797	5.41348	5.42053	5.42908	5.43973	5.45054	5.46102	5.47077	5.48008	5.48804	5.49424	5.49768	5.49709	5.49466	5.48859	5.47901	5.46616	5.44882	5.42998	5.40857	5.38413	5.35795	5.32733	5.29563	5.26232	5.22684	5.1908	5.1551	5.11978	5.08478	5.05117	5.01839	4.98732	4.95874	4.93169	4.91137	4.89793	4.8942	4.8968	4.9025	4.91532	4.93063	4.94802
4	4	5.71037	5.73354	5.75576	5.77642	5.79534	5.81378	5.83276	5.85165	5.87044	5.88898	5.90715	5.9243	5.94096	5.95733	5.97299	5.98808	6.00228	6.01448	6.02564	6.03422	6.03843	6.0386	6.03272	6.02481	6.01336	5.99758	5.97931	5.95536	5.92988	5.90213	5.87063	5.83796	5.80471	5.77151	5.73836	5.70599	5.67371	5.64144	5.61051	5.58043	5.55472	5.53861	5.53599	5.54112	5.54984	5.5663	5.58376	5.60204
4	5	4.48567	4.50978	4.53389	4.558	4.58229	4.60738	4.63748	4.66759	4.69769	4.72774	4.75757	4.78683	4.81609	4.84536	4.87482	4.90492	4.93599	4.96707	4.99813	5.02914	5.05996	5.09061	5.12126	5.15182	5.18214	5.21154	5.24046	5.26938	5.29794	5.32597	5.35172	5.37681	5.4019	5.42682	5.45159	5.47557	5.49947	5.52336	5.54924	5.57638	5.60996	5.64355	5.67714	5.71223	5.74831	5.78737	5.82644	5.8655
5	1	5.60168	5.59492	5.58639	5.57492	5.56068	5.54541	5.52924	5.51362	5.49854	5.48365	5.46868	5.45336	5.43699	5.42002	5.40309	5.38632	5.3698	5.3553	5.34125	5.32616	5.30906	5.29012	5.25763	5.22558	5.19889	5.17469	5.15191	5.13179	5.11233	5.09384	5.07584	5.05808	5.04082	5.02478	5.00983	5.0073	5.00825	5.0148	5.01878	5.02139	5.02236	5.02351	5.02493	5.02793	5.03277	5.04464	5.058	5.07262
5	2	5.1342	5.19287	5.25039	5.30601	5.35806	5.40709	5.4437	5.48037	5.51711	5.54602	5.56838	5.57506	5.58432	5.59506	5.60717	5.61969	5.63288	5.6503	5.66919	5.68914	5.70862	5.72766	5.73876	5.74721	5.75102	5.75123	5.74931	5.74035	5.7241	5.69704	5.65523	5.60621	5.54079	5.47402	5.40606	5.3339	5.26071	5.18596	5.11344	5.04259	4.98507	4.93393	4.89175	4.86692	4.84803	4.83603	4.82922	4.82674
5	3	5.09783	5.10689	5.11715	5.12938	5.14332	5.15775	5.17171	5.185	5.19763	5.2097	5.22164	5.23339	5.24283	5.25094	5.25775	5.26414	5.26986	5.2702	5.26846	5.26411	5.25844	5.25155	5.24263	5.23256	5.22007	5.2054	5.18944	5.16888	5.14747	5.12482	5.10176	5.07856	5.05525	5.03402	5.01463	5.00133	4.99057	4.98464	4.98606	4.99142	5.00186	5.01402	5.02858	5.04702	5.06732	5.09174	5.11679	5.14238
5	4	6.06276	6.06614	6.0694	6.07244	6.0749	6.07675	6.07592	6.07454	6.07264	6.06934	6.06515	6.05893	6.05225	6.0453	6.03775	6.02992	6.02168	6.01205	6.00187	5.99093	5.97951	5.96763	5.95433	5.94068	5.92657	5.91262	5.89878	5.88593	5.87318	5.86061	5.84991	5.84018	5.8328	5.82558	5.81852	5.81218	5.80611	5.80049	5.79526	5.79031	5.78702	5.78422	5.7821	5.78095	5.78052	5.78236	5.7849	5.78802
5	5	4.68413	4.74864	4.81348	4.87886	4.94261	5.00374	5.05089	5.09213	5.12761	5.15724	5.18477	5.20855	5.22747	5.24353	5.25405	5.26238	5.26729	5.27264	5.27968	5.29596	5.3174	5.34359	5.3809	5.42084	5.46439	5.51109	5.55967	5.61484	5.67336	5.73686	5.80161	5.86682	5.93256	5.99799	6.06314	6.12799	6.19275	6.25735	6.32188	6.38634	6.45009	6.51244	6.57283	6.62828	6.68154	6.73043	6.77797	6.8244
6	1	5.58841	5.62073	5.65023	5.67509	5.68612	5.69288	5.70142	5.71072	5.72075	5.72292	5.72351	5.72252	5.71896	5.71393	5.709	5.70411	5.6993	5.69052	5.68022	5.66815	5.65203	5.63215	5.61209	5.59188	5.57135	5.54405	5.51291	5.47501	5.43654	5.39723	5.35952	5.32388	5.29699	5.27219	5.24922	5.23032	5.21165	5.19253	5.17369	5.1555	5.15003	5.14773	5.14989	5.16415	5.18217	5.20307	5.22512	5.24812
6	2	4.77392	4.78012	4.78593	4.79109	4.79433	4.79717	4.80154	4.80655	4.8122	4.81816	4.82442	4.83138	4.84147	4.85337	4.86804	4.88406	4.90222	4.91898	4.93524	4.95104	4.96967	4.99091	5.01025	5.0281	5.04253	5.05897	5.07655	5.09614	5.11031	5.11643	5.12041	5.12299	5.12136	5.11786	5.11272	5.10396	5.09419	5.08285	5.07057	5.05721	5.02923	5.00185	4.97529	4.95099	4.92723	4.90316	4.87898	4.8547
6	3	5.12011	5.13956	5.15992	5.18182	5.20826	5.23628	5.2649	5.29378	5.32291	5.35041	5.37822	5.40753	5.4448	5.48659	5.52664	5.56582	5.60365	5.63536	5.66474	5.69146	5.7133	5.73063	5.74521	5.75762	5.76509	5.77096	5.77593	5.77931	5.77732	5.76735	5.75587	5.74374	5.73049	5.71958	5.71071	5.70637	5.7045	5.70764	5.71241	5.71814	5.72749	5.73944	5.75504	5.78054	5.80894	5.83881	5.86927	5.90022
6	4	5.77581	5.79627	5.81791	5.84151	5.87092	5.90206	5.93208	5.96162	5.9907	6.02214	6.05434	6.0878	6.1257	6.16615	6.20757	6.24947	6.29212	6.33197	6.37076	6.40843	6.4463	6.48437	6.52234	6.56024	6.59797	6.63212	6.66424	6.69277	6.71803	6.73844	6.75738	6.7753	6.7899	6.80176	6.81123	6.81537	6.81695	6.81346	6.80847	6.80273	6.79759	6.79206	6.78599	6.77844	6.77059	6.76314	6.75586	6.74871
6	5	4.86265	4.87871	4.89484	4.91105	4.92755	4.94442	4.96313	4.98263	5.0029	5.02358	5.0444	5.06547	5.0874	5.10985	5.13288	5.1562	5.17997	5.20499	5.23047	5.25648	5.28289	5.30966	5.33665	5.36381	5.39136	5.41824	5.44474	5.47057	5.49604	5.52095	5.54556	5.56987	5.59308	5.61615	5.63911	5.66181	5.68425	5.70613	5.72782	5.74943	5.77089	5.79209	5.81293	5.83278	5.85234	5.87171	5.89101	5.91025
7	1	5.51407	5.51186	5.50807	5.50169	5.48882	5.47411	5.46137	5.44922	5.43767	5.42535	5.41274	5.39961	5.38546	5.37074	5.35736	5.34429	5.3317	5.31887	5.30589	5.29251	5.27852	5.26397	5.25003	5.23628	5.22285	5.21081	5.19955	5.18887	5.1787	5.1693	5.16121	5.15369	5.14717	5.14585	5.14908	5.16092	5.18141	5.22133	5.25559	5.28672	5.31154	5.33972	5.37262	5.40785	5.44488	5.48775	5.53234	5.57838
7	2	5.64837	5.67005	5.68766	5.69853	5.6926	5.68197	5.67677	5.67325	5.67136	5.66534	5.65827	5.64976	5.63859	5.62593	5.61553	5.60566	5.59661	5.58588	5.57437	5.56123	5.54571	5.52799	5.50765	5.48649	5.46396	5.43925	5.41336	5.38666	5.3593	5.33095	5.3017	5.27208	5.24178	5.21207	5.18289	5.15394	5.12515	5.09668	5.07169	5.04862	5.02942	5.01721	5.01481	5.01594	5.01946	5.03017	5.04164	5.05372
7	3	5.618	5.61825	5.61878	5.61976	5.62188	5.62453	5.62832	5.63245	5.63693	5.63854	5.63973	5.6408	5.64173	5.64258	5.64329	5.64396	5.64457	5.64529	5.64598	5.6463	5.64606	5.6453	5.64423	5.64307	5.64176	5.64357	5.64706	5.65037	5.6531	5.65496	5.65598	5.65665	5.65669	5.65487	5.65142	5.64723	5.64251	5.63668	5.62991	5.62262	5.61429	5.60329	5.58854	5.57263	5.55598	5.53724	5.51839	5.49942
7	4	5.04254	5.07257	5.10251	5.13229	5.16169	5.19091	5.21969	5.24834	5.27686	5.30435	5.3316	5.35858	5.38504	5.41122	5.43731	5.46338	5.48942	5.51632	5.54333	5.56939	5.59395	5.6171	5.64052	5.66402	5.68766	5.71274	5.73858	5.76353	5.78728	5.80924	5.83126	5.85329	5.87537	5.89765	5.92011	5.94273	5.96549	5.98857	6.0141	6.04101	6.07067	6.10115	6.13281	6.16339	6.19271	6.21722	6.24036	6.26238
7	5	5.69754	5.70664	5.71549	5.72392	5.73132	5.73846	5.74618	5.75408	5.76216	5.77231	5.78265	5.79278	5.80241	5.81181	5.82441	5.83776	5.85227	5.86491	5.87696	5.88885	5.90062	5.91229	5.92261	5.93251	5.94171	5.95427	5.96865	5.98307	5.99714	6.01067	6.02579	6.04156	6.05854	6.07363	6.08706	6.10036	6.11382	6.12774	6.14302	6.15907	6.17664	6.19175	6.2034	6.21429	6.22484	6.23472	6.24636	6.25949
8	1	5.47865	5.48016	5.48309	5.48837	5.49697	5.50692	5.51862	5.53076	5.54332	5.55685	5.57096	5.58633	5.60211	5.61814	5.63493	5.65174	5.66857	5.68535	5.70208	5.71858	5.7337	5.74754	5.76042	5.77349	5.78735	5.8053	5.82559	5.85036	5.87759	5.90847	5.93789	5.96663	5.99391	6.0205	6.04649	6.07209	6.09749	6.12252	6.14527	6.16662	6.18221	6.19365	6.19926	6.20129	6.20239	6.20359	6.20632	6.21033
8	2	5.22764	5.24687	5.26467	5.28011	5.29221	5.30387	5.32001	5.337	5.3548	5.37435	5.3939	5.4128	5.43146	5.44998	5.46804	5.48699	5.50731	5.52463	5.53869	5.53869	5.53791	5.53639	5.53371	5.52988	5.52339	5.5145	5.50423	5.49128	5.4766	5.45932	5.44177	5.42408	5.40612	5.38907	5.37281	5.3557	5.33813	5.31968	5.30435	5.29066	5.27792	5.26552	5.25361	5.2446	5.23674	5.23072	5.22669	5.22433
8	3	5.67618	5.65762	5.64041	5.62547	5.61371	5.60265	5.58915	5.57561	5.56202	5.54866	5.53469	5.5189	5.50248	5.48569	5.46773	5.44923	5.4299	5.41	5.38976	5.36854	5.34798	5.32803	5.30893	5.29051	5.27364	5.25837	5.24401	5.23142	5.2199	5.20998	5.20276	5.19681	5.19356	5.19154	5.19059	5.19075	5.19144	5.19319	5.19448	5.19554	5.19681	5.19829	5.20008	5.20208	5.20419	5.20658	5.20935	5.21244
8	4	5.76091	5.75744	5.75403	5.7507	5.74749	5.74466	5.74412	5.74477	5.74658	5.75143	5.75575	5.75743	5.75836	5.75884	5.75816	5.75701	5.75513	5.75245	5.74919	5.74391	5.73568	5.7247	5.71099	5.69635	5.68007	5.66389	5.64778	5.63155	5.61384	5.59393	5.57203	5.5492	5.52438	5.49907	5.47333	5.44755	5.42176	5.39595	5.36838	5.33989	5.31064	5.28101	5.25086	5.22252	5.1949	5.16847	5.14333	5.11927
8	5	5.49922	5.51234	5.52577	5.5397	5.55436	5.56902	5.58209	5.59485	5.6073	5.61907	5.62985	5.63805	5.64546	5.6524	5.65802	5.66329	5.66802	5.67307	5.67856	5.68618	5.69581	5.7073	5.72062	5.73452	5.74941	5.76343	5.77694	5.78943	5.80095	5.81104	5.81796	5.82339	5.82565	5.82018	5.80794	5.79333	5.77764	5.75986	5.73828	5.71468	5.6892	5.66275	5.63494	5.61489	5.59819	5.58792	5.58546	5.58951
8	6	4.95387	4.95609	4.95873	4.9621	4.96647	4.97137	4.97751	4.98407	4.99102	4.99896	5.00725	5.01616	5.02517	5.03423	5.04324	5.05269	5.06285	5.07353	5.08453	5.09648	5.10791	5.11884	5.12936	5.13985	5.15039	5.16176	5.17359	5.1863	5.19948	5.21335	5.22849	5.24422	5.26123	5.28603	5.31766	5.35014	5.38292	5.41627	5.44877	5.48116	5.52122	5.56728	5.62179	5.6802	5.73937	5.79721	5.85128	5.90221
9	1	5.97967	5.998	6.0165	6.03531	6.05429	6.07332	6.09223	6.11057	6.12834	6.14502	6.16122	6.17646	6.19076	6.20453	6.2187	6.23216	6.2445	6.25432	6.26327	6.27157	6.28062	6.29035	6.30125	6.31266	6.32504	6.33982	6.35593	6.37334	6.39101	6.40905	6.42617	6.44281	6.45823	6.473	6.4872	6.50028	6.5124	6.52234	6.53063	6.53797	6.54279	6.54621	6.54766	6.54905	6.55048	6.55217	6.55393	6.55575
9	2	5.39837	5.41416	5.42772	5.4376	5.44496	5.45157	5.45867	5.46404	5.46772	5.4702	5.47235	5.47402	5.47666	5.4796	5.4637	5.44553	5.42383	5.40285	5.3818	5.35904	5.33598	5.31265	5.28589	5.25588	5.21827	5.19518	5.1799	5.1639	5.14634	5.12647	5.10697	5.08786	5.07031	5.05049	5.02869	4.99952	4.96861	4.93519	4.90041	4.8648	4.82558	4.78321	4.7364	4.68442	4.63255	4.58786	4.55021	4.51842
9	3	5.42454	5.42743	5.43013	5.4325	5.43452	5.43639	5.43788	5.43927	5.44057	5.44171	5.4428	5.44384	5.4452	5.44674	5.44871	5.45077	5.45297	5.45527	5.45772	5.46092	5.46458	5.46869	5.47373	5.47928	5.48589	5.495	5.5055	5.51777	5.53061	5.54429	5.5587	5.57333	5.58799	5.60448	5.62259	5.6459	5.66949	5.69246	5.71459	5.73621	5.75611	5.77473	5.79153	5.82154	5.85555	5.89216	5.92903	5.96612
9	4	5.2144	5.21142	5.20908	5.20781	5.2073	5.20703	5.20669	5.20666	5.20691	5.20718	5.2074	5.20753	5.20745	5.20724	5.20707	5.20689	5.20668	5.20639	5.20637	5.20812	5.20893	5.20888	5.20929	5.21108	5.21637	5.22265	5.22946	5.23641	5.24335	5.25027	5.25746	5.26489	5.27328	5.28216	5.29147	5.30163	5.31195	5.32249	5.33325	5.34422	5.3573	5.37285	5.39188	5.41041	5.42915	5.44951	5.47127	5.49422
10	1	5.00761	5.04695	5.07352	5.07895	5.0544	5.02191	5.00202	4.9836	4.96662	4.95202	4.93848	4.92705	4.91826	4.91109	4.9122	4.91896	4.93454	4.95322	4.97257	4.99029	5.00165	5.00714	5.00711	5.00576	5.00259	4.99726	4.99071	4.98181	4.97161	4.9595	4.94419	4.92738	4.90738	4.88492	4.8603	4.83703	4.81446	4.79332	4.77485	4.75774	4.74081	4.72368	4.70629	4.71378	4.72921	4.75162	4.77613	4.80239
10	2	5.51829	5.52249	5.52581	5.52767	5.52745	5.52617	5.5223	5.51724	5.51102	5.5018	5.49299	5.48651	5.4811	5.47634	5.47407	5.47128	5.46767	5.46372	5.45965	5.45547	5.4511	5.44655	5.44079	5.43296	5.41993	5.40363	5.38546	5.36356	5.33876	5.30964	5.27636	5.24112	5.20172	5.1612	5.1197	5.07916	5.0391	5.00002	4.96489	4.93192	4.90302	4.87677	4.85424	4.83802	4.82414	4.81368	4.80652	4.80211
10	3	5.31911	5.33159	5.34484	5.35938	5.37572	5.39306	5.41307	5.43372	5.455	5.47774	5.50127	5.52652	5.5529	5.57999	5.61021	5.63938	5.66691	5.693	5.71811	5.74006	5.76083	5.78051	5.79871	5.81574	5.83011	5.84179	5.85194	5.85896	5.86314	5.86309	5.86255	5.86177	5.86051	5.85636	5.84967	5.83878	5.82583	5.80877	5.79281	5.77763	5.76787	5.76216	5.76214	5.76072	5.75879	5.75618	5.75294	5.74919
10	4	5.68474	5.70091	5.7167	5.73186	5.74614	5.76001	5.77308	5.78594	5.79859	5.81077	5.82206	5.83098	5.83934	5.84737	5.85479	5.86124	5.86614	5.86993	5.87303	5.8741	5.87443	5.8741	5.87236	5.86893	5.86145	5.85347	5.8452	5.83623	5.82587	5.81345	5.79946	5.78474	5.76845	5.75185	5.73499	5.72002	5.70598	5.69384	5.68495	5.6778	5.6728	5.66906	5.66707	5.66744	5.66885	5.67239	5.6786	5.68704
10	5	5.17009	5.18148	5.19323	5.20558	5.21879	5.23239	5.24663	5.26074	5.2747	5.28818	5.30112	5.31269	5.32421	5.3357	5.34782	5.36205	5.3796	5.39803	5.41644	5.4331	5.45092	5.4698	5.49024	5.51205	5.53701	5.56292	5.58936	5.61653	5.64229	5.66595	5.68924	5.71237	5.73514	5.75629	5.77602	5.79349	5.80985	5.824	5.83533	5.84514	5.85264	5.85871	5.86278	5.866	5.86886	5.87106	5.87245	5.87318
10	6	5.56316	5.56397	5.5622	5.55613	5.54397	5.53016	5.51856	5.50584	5.49205	5.47479	5.45719	5.43994	5.42389	5.40857	5.39735	5.38601	5.37448	5.36285	5.35117	5.33938	5.32972	5.32202	5.31598	5.30999	5.30365	5.29804	5.29284	5.28848	5.28483	5.28223	5.28229	5.28361	5.28759	5.29145	5.29519	5.29897	5.30276	5.30658	5.30899	5.31074	5.31373	5.31784	5.32353	5.33054	5.33799	5.34592	5.35414	5.36259
11	1	6.04065	6.05714	6.07404	6.09163	6.1099	6.12848	6.14767	6.16609	6.18378	6.20098	6.21805	6.23492	6.25084	6.2662	6.28011	6.29327	6.30526	6.31433	6.32235	6.3294	6.33607	6.34238	6.34808	6.35346	6.35815	6.36251	6.36667	6.37045	6.37415	6.37774	6.38146	6.38514	6.3884	6.39122	6.39366	6.3954	6.39692	6.3981	6.39881	6.39922	6.39814	6.39648	6.39402	6.39071	6.387	6.3824	6.37633	6.36903
11	2	5.82753	5.8232	5.819	5.815	5.81062	5.80574	5.7983	5.79038	5.78199	5.77354	5.76514	5.75694	5.74871	5.74047	5.73273	5.72534	5.71849	5.71329	5.70877	5.70529	5.70154	5.69753	5.6924	5.68642	5.67849	5.67018	5.66166	5.65297	5.64467	5.63692	5.62982	5.62312	5.61762	5.61307	5.60937	5.60881	5.60901	5.61033	5.61277	5.61587	5.62141	5.62803	5.63616	5.64541	5.65515	5.66584	5.6866	5.71575
11	3	5.87602	5.87944	5.88269	5.88565	5.88825	5.89066	5.89254	5.89438	5.89618	5.89924	5.90301	5.90838	5.90434	5.89491	5.88498	5.87506	5.86514	5.85632	5.8478	5.83916	5.82971	5.81949	5.80721	5.79816	5.79837	5.79888	5.79953	5.79919	5.79672	5.79108	5.77943	5.76569	5.74989	5.7337	5.71715	5.69102	5.66216	5.62889	5.59261	5.55473	5.5152	5.47565	5.43605	5.39269	5.34715	5.29573	5.24602	5.19772
11	4	5.64736	5.6528	5.65524	5.65271	5.64542	5.63606	5.62326	5.61216	5.60272	5.59255	5.58163	5.56887	5.55462	5.53951	5.52453	5.50985	5.49567	5.4837	5.47224	5.45975	5.44705	5.43417	5.42115	5.40831	5.39596	5.38445	5.37344	5.36417	5.35639	5.35082	5.34765	5.34537	5.34427	5.34367	5.34351	5.34083	5.33956	5.34243	5.34815	5.35538	5.36419	5.37299	5.38179	5.38968	5.39704	5.40298	5.40827	5.41303
11	5	6.15142	6.14962	6.14781	6.146	6.14483	6.14432	6.14679	6.15025	6.15466	6.16032	6.16652	6.17375	6.18748	6.20495	6.22391	6.24327	6.26327	6.28334	6.30331	6.32256	6.34167	6.36066	6.37959	6.39866	6.41813	6.43741	6.45656	6.47509	6.49291	6.50966	6.52594	6.54197	6.55738	6.57233	6.58687	6.60043	6.61374	6.62668	6.63923	6.65156	6.66302	6.67492	6.68745	6.69998	6.71244	6.72458	6.73686	6.74926
[truncated: 78 more columns]

## Sheet: TeTX5.xls
Session	Step	1	2	3	4	5	6	7	8	9	10	11	12	13	14	15	16	17	18	19	20	21	22	23	24	25	26	27	28	29	30	31	32	33	34	35	36	37	38	39	40	41	42	43	44	45	46	47	48
1	1	4.92299	4.91348	4.90397	4.89754	4.89259	4.88797	4.88348	4.87955	4.87806	4.87801	4.87826	4.87875	4.87944	4.88036	4.88169	4.88388	4.88741	4.8914	4.89744	4.90384	4.91284	4.92303	4.93444	4.94766	4.96167	4.98016	4.99958	5.0147	5.0278	5.03804	5.04552	5.05213	5.0601	5.06941	5.07993	5.0923	5.10568	5.12113	5.13733	5.15198	5.16436	5.17535	5.17601	5.17667	5.17749	5.17834	5.17777	5.17575
1	2	5.22001	5.22001	5.22001	5.22001	5.22001	5.22001	5.22001	5.22001	5.22001	5.22001	5.22001	5.22001	5.22001	5.22001	5.22068	5.22348	5.22956	5.23626	5.24564	5.25516	5.26468	5.2742	5.28708	5.3049	5.3246	5.35466	5.3869	5.42086	5.45562	5.48826	5.51815	5.54671	5.57526	5.60381	5.63236	5.66091	5.68963	5.71875	5.74874	5.78201	5.8198	5.85651	5.88506	5.91361	5.94906	5.98652	6.02437	6.06239
1	3	5.72425	5.69583	5.66741	5.6445	5.62425	5.60704	5.59356	5.58131	5.56925	5.55731	5.55253	5.55368	5.55994	5.5721	5.58797	5.60348	5.61838	5.63266	5.64425	5.65613	5.67233	5.69051	5.70848	5.72616	5.74368	5.76034	5.77681	5.79433	5.81235	5.83054	5.84877	5.86808	5.89024	5.91535	5.94551	5.98339	6.02317	6.0658	6.10957	6.15182	6.1919	6.23157	6.26809	6.3046	6.3398	6.37461	6.40612	6.43435
1	4	5.49851	5.51011	5.5217	5.53403	5.54672	5.5595	5.57234	5.58528	5.59859	5.61214	5.62701	5.643	5.65939	5.67598	5.69278	5.70987	5.7274	5.74516	5.76393	5.78296	5.80426	5.82658	5.84957	5.87355	5.89758	5.92159	5.94559	5.97235	6.00041	6.02864	6.05669	6.08367	6.10797	6.12976	6.15209	6.17523	6.19965	6.22712	6.25579	6.28288	6.30771	6.33204	6.35263	6.37321	6.39321	6.41304	6.43285	6.45266
1	5	5.3414	5.3414	5.3414	5.3414	5.3414	5.3414	5.3414	5.3414	5.3414	5.3414	5.3414	5.3414	5.34141	5.34142	5.34149	5.34169	5.34213	5.343	5.34573	5.34867	5.35296	5.35785	5.36391	5.37167	5.37955	5.38773	5.39597	5.40438	5.41288	5.42141	5.42996	5.4382	5.44556	5.45205	5.45778	5.46236	5.46572	5.46634	5.46452	5.45747	5.44306	5.42789	5.40701	5.38614	5.36733	5.34911	5.32975	5.30917
1	6	5.76313	5.73557	5.70801	5.67806	5.64696	5.61423	5.57944	5.54521	5.51664	5.49147	5.46551	5.4389	5.41127	5.38222	5.35499	5.33647	5.33118	5.32649	5.32444	5.32253	5.32078	5.31911	5.31639	5.31213	5.30771	5.3027	5.29757	5.29211	5.28649	5.27936	5.2705	5.26059	5.25011	5.23908	5.22797	5.21671	5.2056	5.19486	5.18434	5.17393	5.16369	5.15344	5.1432	5.13296	5.13086	5.13114	5.13446	5.14059
1	7	5.35798	5.37773	5.39747	5.42104	5.44644	5.47141	5.49535	5.51875	5.54114	5.56291	5.5843	5.60535	5.62589	5.64571	5.66467	5.68243	5.69831	5.71372	5.72702	5.74017	5.75277	5.76513	5.77716	5.7887	5.80005	5.81031	5.82034	5.82835	5.83541	5.84137	5.8463	5.85092	5.85603	5.8616	5.86655	5.87057	5.87413	5.87678	5.87912	5.88225	5.88653	5.89109	5.8978	5.9045	5.91131	5.91813	5.92464	5.93082
1	8	5.83716	5.85241	5.86767	5.88552	5.90463	5.92288	5.93968	5.95576	5.97071	5.98497	6.00057	6.01727	6.03196	6.04289	6.0513	6.05951	6.06742	6.07532	6.08316	6.09073	6.09565	6.09937	6.10424	6.11084	6.11782	6.12668	6.13594	6.14565	6.15558	6.16474	6.17296	6.18133	6.19137	6.20294	6.21326	6.2217	6.22952	6.23625	6.24214	6.24657	6.24896	6.25133	6.25356	6.25579	6.25372	6.25039	6.24624	6.24139
2	1	4.67524	4.69154	4.70767	4.72346	4.73678	4.74734	4.75641	4.76508	4.77322	4.77972	4.78581	4.79157	4.79598	4.79976	4.80466	4.81202	4.82189	4.83479	4.84685	4.85855	4.86927	4.88131	4.8969	4.91691	4.94096	4.96698	4.98898	5.01032	5.0303	5.05149	5.07463	5.09929	5.12497	5.14962	5.17047	5.19067	5.21032	5.22983	5.24935	5.26886	5.28837	5.30788	5.3274	5.34747	5.36849	5.39741	5.42994	5.46246
2	2	4.54346	4.63911	4.72053	4.77273	4.80508	4.826	4.83962	4.84955	4.85911	4.86868	4.87824	4.88781	4.89738	4.90738	4.9196	4.93731	4.96433	5.00259	5.05349	5.10801	5.16079	5.21163	5.26085	5.30868	5.3565	5.40433	5.45216	5.49464	5.52618	5.55078	5.57172	5.59029	5.6069	5.61955	5.61955	5.61955	5.61955	5.61955	5.61955	5.61955	5.61955	5.61955	5.61955	5.63851	5.66343	5.69129	5.71998	5.74868
2	3	4.99147	4.99147	4.99239	4.99518	5.00252	5.01443	5.02758	5.03835	5.0481	5.05518	5.06805	5.08573	5.10702	5.12958	5.15046	5.16853	5.18673	5.20509	5.22471	5.24469	5.26464	5.2845	5.30428	5.32405	5.34397	5.36397	5.38409	5.40165	5.41394	5.42333	5.43146	5.43593	5.43367	5.43022	5.42505	5.41836	5.41041	5.40248	5.39481	5.38731	5.37738	5.35741	5.32532	5.2909	5.25546	5.21664	5.17608	5.13498
2	4	5.14172	5.17377	5.20493	5.23428	5.26173	5.28769	5.31331	5.3398	5.36642	5.3932	5.42009	5.44707	5.47523	5.50442	5.53482	5.56704	5.60061	5.63579	5.652	5.66239	5.67124	5.68025	5.69001	5.69958	5.70681	5.71291	5.71566	5.71723	5.71636	5.7112	5.70197	5.69344	5.69156	5.6942	5.70977	5.72467	5.739	5.75152	5.76243	5.77104	5.776	5.778	5.77643	5.77395	5.77122	5.76867	5.76821	5.77175
2	5	5.84952	5.78616	5.73098	5.69258	5.67579	5.67754	5.6859	5.68911	5.69349	5.70351	5.72783	5.76398	5.80042	5.83466	5.86748	5.89885	5.93022	5.9616	5.98735	6.01089	6.02894	6.04611	6.0663	6.08874	6.11024	6.13128	6.14697	6.16266	6.17834	6.19445	6.21104	6.22984	6.25295	6.27648	6.30001	6.32354	6.34707	6.36648	6.3827	6.39708	6.4092	6.41939	6.42723	6.43507	6.44281	6.44944	6.45427	6.4565
2	6	5.05257	5.05257	5.05257	5.05257	5.05257	5.05257	5.05326	5.0555	5.05797	5.06075	5.06343	5.06602	5.06887	5.07215	5.07662	5.08235	5.08675	5.08953	5.09526	5.10233	5.11401	5.12785	5.14195	5.1572	5.17508	5.19425	5.21703	5.24022	5.26425	5.28899	5.31421	5.34237	5.37623	5.40966	5.43975	5.4692	5.49809	5.52563	5.55173	5.57484	5.59304	5.60748	5.61737	5.62651	5.63546	5.64484	5.65537	5.66785
2	7	5.48266	5.49737	5.51069	5.52116	5.52972	5.53723	5.54448	5.55235	5.56037	5.56864	5.57705	5.58559	5.5948	5.60476	5.61614	5.62931	5.64218	5.65469	5.66805	5.68175	5.69624	5.71106	5.72585	5.74084	5.75647	5.77241	5.79037	5.80885	5.82843	5.84819	5.86771	5.88739	5.90762	5.92772	5.9472	5.96577	5.98358	5.9997	6.01452	6.02796	6.03963	6.05073	6.06116	6.07158	6.08199	6.09215	6.10181	6.11065
3	1	6.14767	6.09806	6.04845	6.01798	6.00271	5.99366	5.98638	5.98119	5.97717	5.99743	6.01819	6.04293	6.07065	6.09725	6.11793	6.13207	6.14635	6.16197	6.17765	6.19498	6.21352	6.22919	6.23569	6.23289	6.22894	6.21767	6.20582	6.19085	6.1736	6.15583	6.1385	6.12156	6.10357	6.08077	6.05745	6.03243	6.00619	5.9805	5.95754	5.93681	5.91405	5.88431	5.8536	5.82679	5.80287	5.77658	5.74014	5.69638
3	2	5.83944	5.89127	5.94309	5.98369	6.01538	6.04261	6.06661	6.08676	6.10703	6.12964	6.15231	6.17147	6.18795	6.2035	6.21905	6.2346	6.2501	6.26519	6.28026	6.29515	6.3099	6.32473	6.33992	6.35547	6.37078	6.38463	6.39837	6.40927	6.41812	6.42565	6.43113	6.43471	6.43806	6.44031	6.44244	6.44264	6.44145	6.4387	6.4322	6.42263	6.41177	6.39644	6.3805	6.36227	6.34233	6.31988	6.29004	6.25487
3	3	6.16239	6.16239	6.16239	6.16239	6.16239	6.16239	6.16239	6.16239	6.16239	6.16239	6.16239	6.1658	6.1718	6.18189	6.20063	6.22891	6.25805	6.29564	6.33362	6.37162	6.40963	6.44763	6.48564	6.52364	6.56117	6.59574	6.63007	6.65363	6.66933	6.67783	6.67199	6.653	6.63403	6.61512	6.59621	6.57736	6.55856	6.5397	6.52064	6.50141	6.48215	6.4628	6.44344	6.43897	6.44552	6.45696	6.47729	6.50401
3	4	5.21407	5.24512	5.27617	5.30388	5.32894	5.35328	5.37826	5.40401	5.42971	5.45427	5.47882	5.50241	5.52528	5.54777	5.56992	5.5917	5.61324	5.63255	5.65175	5.66855	5.68358	5.69736	5.70926	5.71927	5.7288	5.73539	5.74174	5.74618	5.74922	5.75149	5.75268	5.75289	5.75304	5.75292	5.75278	5.75265	5.75253	5.75213	5.75085	5.74884	5.74718	5.74673	5.74645	5.74434	5.74087	5.73723	5.73399	5.73104
3	5	5.75111	5.74528	5.73944	5.74235	5.7522	5.76441	5.77612	5.78722	5.79869	5.81767	5.83681	5.85773	5.87999	5.90164	5.92037	5.93588	5.95181	5.97202	5.99243	6.0092	6.02327	6.03588	6.04685	6.05617	6.06464	6.06774	6.07043	6.07104	6.07014	6.06822	6.06457	6.05936	6.05532	6.05661	6.05847	6.06088	6.06368	6.06379	6.05511	6.03924	6.02792	6.03231	6.03886	6.0429	6.04508	6.04538	6.04056	6.03206
3	6	5.26858	5.28586	5.30313	5.31868	5.33285	5.34666	5.36085	5.37549	5.39019	5.40637	5.42258	5.43843	5.454	5.46941	5.48469	5.49981	5.51527	5.53402	5.55292	5.56949	5.58432	5.59801	5.61008	5.62051	5.63096	5.64156	5.65216	5.66224	5.67194	5.68157	5.69137	5.70132	5.7106	5.71685	5.72278	5.72928	5.73619	5.7439	5.75378	5.76543	5.77635	5.78477	5.79285	5.80124	5.80988	5.81863	5.82758	5.83669
4	1	5.11016	5.1533	5.1955	5.2161	5.22801	5.23299	5.23087	5.23346	5.25058	5.26468	5.26157	5.25742	5.25609	5.25793	5.26596	5.28123	5.29356	5.2982	5.30267	5.30678	5.31093	5.31537	5.32057	5.32732	5.33566	5.34212	5.34522	5.34904	5.35376	5.36014	5.36867	5.38025	5.39616	5.41615	5.43515	5.45334	5.47015	5.48579	5.49899	5.50925	5.51899	5.53275	5.54898	5.56398	5.57842	5.58997	5.59934	5.60765
4	2	5.11006	5.14313	5.17557	5.19338	5.20535	5.21303	5.21604	5.22001	5.22699	5.23574	5.25458	5.27442	5.29427	5.31411	5.33396	5.35419	5.37623	5.40298	5.43298	5.47009	5.50811	5.54475	5.57527	5.59199	5.59201	5.59209	5.5923	5.59242	5.59243	5.59096	5.58721	5.58016	5.56831	5.55169	5.53055	5.50568	5.4873	5.47517	5.4658	5.45693	5.44831	5.43954	5.43068	5.42091	5.41073	5.40011	5.38922	5.37855
4	3	5.27532	5.27532	5.27617	5.29652	5.32438	5.35497	5.38839	5.42018	5.44687	5.47251	5.4921	5.51227	5.5373	5.56436	5.58938	5.61103	5.62907	5.6377	5.64162	5.63523	5.62849	5.62583	5.62697	5.6311	5.63896	5.6474	5.65689	5.66638	5.67587	5.68536	5.69486	5.70737	5.72807	5.75643	5.78237	5.80632	5.82487	5.83869	5.84646	5.84803	5.84487	5.83718	5.82671	5.81123	5.79347	5.76312	5.72322	5.67657
4	4	5.52955	5.56359	5.59758	5.63038	5.66272	5.69477	5.72644	5.75776	5.78796	5.81798	5.84693	5.87688	5.91134	5.9475	5.98114	6.01151	6.04153	6.07066	6.09864	6.12412	6.14824	6.17056	6.19178	6.21319	6.23393	6.24901	6.25396	6.25894	6.26395	6.26825	6.27143	6.27367	6.27544	6.27678	6.27844	6.28034	6.28158	6.28219	6.28215	6.28152	6.28087	6.28132	6.28246	6.28428	6.28642	6.28896	6.29178	6.29501
4	5	5.97651	5.94676	5.91709	5.88931	5.86251	5.8388	5.81935	5.80537	5.80855	5.81503	5.84032	5.86808	5.89824	5.92965	5.96095	5.99235	6.02479	6.05995	6.08829	6.10166	6.1138	6.13031	6.14907	6.16626	6.18138	6.19553	6.20797	6.22184	6.23758	6.25418	6.27121	6.28806	6.30365	6.31805	6.33282	6.34788	6.3622	6.37579	6.38828	6.39953	6.41019	6.42118	6.43237	6.43872	6.44289	6.44843	6.45541	6.4629
4	6	5.1619	5.1963	5.23014	5.2509	5.26764	5.29353	5.33014	5.37001	5.41997	5.4697	5.51811	5.56652	5.61549	5.66491	5.71496	5.76557	5.81521	5.8623	5.9037	5.93263	5.95637	5.97478	5.98935	6.003	6.01535	6.02655	6.03566	6.04576	6.05712	6.06738	6.07525	6.08102	6.08552	6.08879	6.09172	6.09436	6.09746	6.10101	6.10506	6.1096	6.11379	6.11571	6.11625	6.11619	6.11586	6.11544	6.115	6.11377
4	7	5.7149	5.72246	5.72983	5.73288	5.73435	5.73608	5.73811	5.74018	5.74233	5.74437	5.74573	5.74722	5.74956	5.75255	5.7563	5.76108	5.76617	5.77206	5.77826	5.78514	5.79231	5.7998	5.80739	5.81467	5.82148	5.82762	5.83259	5.83708	5.84097	5.8446	5.84813	5.85166	5.85537	5.85928	5.86406	5.86954	5.87764	5.88808	5.90072	5.91525	5.93131	5.94899	5.96768	5.98576	6.00356	6.02054	6.03692	6.0521
5	1	5.64817	5.64865	5.64914	5.64942	5.64952	5.64948	5.64922	5.64864	5.64808	5.64798	5.64797	5.64794	5.64789	5.64782	5.64783	5.64798	5.64812	5.64822	5.64829	5.64858	5.64944	5.65053	5.65181	5.65336	5.65497	5.65661	5.65829	5.65992	5.66116	5.66226	5.66296	5.66307	5.66296	5.66306	5.66365	5.66423	5.66363	5.66259	5.66842	5.68578	5.71134	5.73759	5.76691	5.79624	5.82565	5.85511	5.88456	5.91399
5	2	5.86422	5.85754	5.85085	5.84559	5.84162	5.83832	5.8356	5.8337	5.83184	5.83066	5.82963	5.82876	5.82808	5.8275	5.82697	5.82654	5.82625	5.82748	5.82955	5.83144	5.83271	5.83373	5.83525	5.83752	5.83982	5.84143	5.84216	5.84291	5.84386	5.84488	5.84689	5.8504	5.85602	5.86904	5.89959	5.93015	5.96715	6.00655	6.04639	6.08649	6.12705	6.16934	6.21927	6.26919	6.31611	6.36148	6.40308	6.43712
5	3	5.65037	5.68018	5.71162	5.73952	5.76941	5.80042	5.82834	5.85457	5.88833	5.92583	5.96016	5.99067	6.02059	6.04693	6.06962	6.09169	6.11072	6.13166	6.15192	6.17801	6.20028	6.22397	6.2524	6.27785	6.28816	6.29129	6.2981	6.3055	6.30653	6.31734	6.33974	6.3653	6.38789	6.40311	6.41916	6.4306	6.43809	6.44099	6.44274	6.45673	6.49193	6.53158	6.57169	6.61631	6.66656	6.69371	6.70879	6.72098
5	4	5.65312	5.65209	5.65091	5.64663	5.64125	5.63665	5.63299	5.62975	5.62791	5.62722	5.63305	5.64063	5.65272	5.66834	5.68814	5.71264	5.73427	5.74838	5.76323	5.7797	5.79644	5.81305	5.82922	5.84446	5.85831	5.87048	5.87962	5.89373	5.9142	5.93705	5.96036	5.98329	6.00434	6.02347	6.0397	6.05353	6.06558	6.07625	6.08615	6.09574	6.10391	6.10757	6.10846	6.08932	6.06111	6.0346	6.01084	5.9893
5	5	5.58771	5.59326	5.59881	5.60837	5.62026	5.63132	5.64008	5.64734	5.65404	5.65985	5.66526	5.6693	5.67295	5.67327	5.67025	5.6675	5.66565	5.66407	5.66107	5.65721	5.65366	5.65093	5.64714	5.63697	5.61578	5.59458	5.57952	5.56446	5.54833	5.53159	5.5152	5.49964	5.48454	5.46927	5.45373	5.4446	5.4579	5.4776	5.49622	5.51374	5.53294	5.55802	5.58478	5.61152	5.63824	5.66552	5.69374	5.72178
5	6	6.07433	6.06955	6.06477	6.05868	6.05206	6.04831	6.04822	6.04802	6.04575	6.04318	6.05192	6.06346	6.07454	6.0849	6.09438	6.10252	6.11081	6.12492	6.14118	6.16163	6.18442	6.2053	6.22305	6.24046	6.26097	6.28343	6.3075	6.33252	6.3534	6.36989	6.38386	6.39675	6.40807	6.41583	6.41937	6.42195	6.42342	6.42474	6.42629	6.42868	6.43297	6.43955	6.44469	6.44681	6.45114	6.46066	6.47202	6.48234
6	1	6.44786	6.44786	6.44963	6.45434	6.47507	6.51056	6.54962	6.58391	6.61254	6.63312	6.65371	6.67429	6.69488	6.71546	6.73605	6.75664	6.77683	6.79315	6.79535	6.79288	6.78713	6.78027	6.77341	6.76655	6.75968	6.75282	6.74596	6.7391	6.73224	6.72538	6.71851	6.71165	6.70479	6.69809	6.69481	6.69556	6.70453	6.71754	6.73224	6.74791	6.76424	6.78114	6.79815	6.8152	6.8323	6.84913	6.86567	6.88203
6	2	6.38084	6.39482	6.395	6.37219	6.32708	6.26864	6.21618	6.18476	6.15249	6.11899	6.08439	6.04931	6.01357	5.98568	5.9717	5.97029	5.97751	5.98628	5.99505	6.01053	6.03153	6.05303	6.07193	6.08654	6.0939	6.09241	6.08552	6.07701	6.06824	6.05947	6.05355	6.05154	6.04906	6.03976	6.02737	6.01134	6.00516	6.00568	6.015	6.03271	6.05437	6.07875	6.09717	6.11196	6.11899	6.1213	6.12057	6.11586
6	3	6.67112	6.70542	6.73812	6.76813	6.79502	6.81961	6.84228	6.86277	6.88283	6.90227	6.90033	6.89145	6.88116	6.87087	6.86058	6.85028	6.83999	6.8297	6.8194	6.80911	6.79882	6.79293	6.79112	6.79024	6.79024	6.79024	6.79023	6.78924	6.78561	6.77766	6.76439	6.74711	6.73083	6.72336	6.71915	6.71877	6.71877	6.71877	6.71877	6.71877	6.71877	6.71932	6.72536	6.72997	6.72845	6.71838	6.70104	6.68046
6	4	5.7745	5.78597	5.79781	5.81026	5.82833	5.85176	5.87695	5.90153	5.92499	5.94686	5.96887	5.99099	6.01346	6.03642	6.05993	6.0843	6.11024	6.13574	6.15856	6.17896	6.19747	6.20711	6.20764	6.20203	6.18842	6.1731	6.15672	6.13864	6.11953	6.09911	6.07755	6.05485	6.02772	5.98668	5.9433	5.89716	5.85015	5.80284	5.75538	5.71039	5.67129	5.63721	5.60392	5.57223	5.54465	5.5189	5.49408	5.47661
6	5	6.02603	6.02367	6.02167	6.02028	6.01963	6.0196	6.02057	6.02326	6.02705	6.03242	6.03851	6.04481	6.051	6.05759	6.065	6.07338	6.08315	6.0936	6.1056	6.11775	6.12995	6.14263	6.15576	6.16909	6.18256	6.19558	6.20835	6.22234	6.23644	6.2504	6.2637	6.27618	6.28844	6.30104	6.31336	6.32533	6.33663	6.3472	6.35576	6.36291	6.37076	6.37928	6.38878	6.39866	6.40925	6.41896	6.42764	6.43591
6	6	6.10393	6.10924	6.1158	6.12445	6.13159	6.13657	6.14098	6.14576	6.15002	6.15352	6.15275	6.15124	6.15268	6.15455	6.15416	6.153	6.1547	6.15592	6.15344	6.15286	6.15398	6.15514	6.1551	6.15289	6.14712	6.13753	6.12568	6.11672	6.10897	6.10253	6.09442	6.08342	6.07546	6.08186	6.08935	6.09815	6.10615	6.11377	6.12164	6.1298	6.13791	6.14533	6.1462	6.14689	6.14962	6.15281	6.156	6.15893
6	7	5.63201	5.59579	5.56697	5.55046	5.54527	5.54756	5.55632	5.57278	5.59141	5.61314	5.63679	5.66326	5.70082	5.74509	5.79077	5.83478	5.86946	5.90171	5.93119	5.96153	5.99268	6.02266	6.04933	6.06983	6.082	6.09475	6.10781	6.11847	6.1287	6.13888	6.14845	6.15717	6.16533	6.17266	6.18009	6.18763	6.19415	6.20021	6.2064	6.21312	6.22055	6.22864	6.2375	6.24673	6.25669	6.26886	6.28312	6.30047
7	1	5.25102	5.39491	5.53881	5.62652	5.68722	5.74726	5.81217	5.87444	5.91728	5.94846	5.97439	5.99596	6.01401	6.02813	6.03846	6.04498	6.04553	6.04418	6.03444	6.02371	6.00699	5.98753	5.96888	5.95142	5.93467	5.92202	5.91023	5.90374	5.89974	5.89846	5.89964	5.9039	5.91321	5.92741	5.9438	5.9635	5.98457	6.00824	6.0336	6.06087	6.09083	6.1211	6.15375	6.18641	6.22043	6.25485	6.29045	6.32718
7	2	5.62473	5.62218	5.61963	5.61834	5.61766	5.61753	5.61806	5.61903	5.6211	5.62384	5.62744	5.63174	5.63692	5.64324	5.65072	5.65955	5.67046	5.68166	5.69418	5.70683	5.72021	5.73392	5.74698	5.75906	5.77089	5.78139	5.7916	5.79931	5.80585	5.81058	5.81352	5.81503	5.81502	5.81354	5.81137	5.80813	5.80483	5.80161	5.79842	5.79517	5.79182	5.7885	5.78537	5.78223	5.7805	5.77918	5.77814	5.77733
7	3	4.71143	4.72205	4.73267	4.75037	4.77147	4.79492	4.82095	4.84814	4.87698	4.90679	4.93983	4.97555	5.01415	5.05635	5.10102	5.14612	5.1919	5.23798	5.28544	5.33308	5.38183	5.4311	5.47866	5.5237	5.56826	5.61046	5.65216	5.6844	5.71221	5.73386	5.74958	5.76104	5.76888	5.77312	5.77398	5.76968	5.7641	5.75657	5.7476	5.73638	5.72197	5.70726	5.6903	5.67334	5.66112	5.65027	5.63736	5.6222
7	4	5.16854	5.19901	5.22948	5.24856	5.26217	5.27461	5.28659	5.29907	5.31455	5.33183	5.34711	5.36074	5.37789	5.40154	5.42992	5.45987	5.49223	5.52513	5.56042	5.59594	5.63266	5.66992	5.70632	5.74142	5.77614	5.80879	5.841	5.86947	5.89619	5.92041	5.9422	5.9621	5.9801	5.99616	6.00911	6.01732	6.02398	6.02792	6.0299	6.02899	6.02397	6.0181	6.00583	5.99357	5.9777	5.96078	5.93939	5.91358
8	1	5.73835	5.76469	5.78902	5.81001	5.82963	5.84905	5.86865	5.88847	5.90666	5.92254	5.93957	5.95731	5.97685	5.99416	6.00606	6.01	5.99977	5.9858	5.96735	5.94884	5.93044	5.91084	5.88966	5.86695	5.84216	5.81681	5.79163	5.79424	5.80005	5.80374	5.8055	5.80604	5.80575	5.80415	5.80201	5.79924	5.79665	5.79358	5.78782	5.78052	5.77524	5.77164	5.7682	5.7607	5.74189	5.72282	5.706	5.69027
8	2	5.69036	5.70431	5.71997	5.73848	5.75863	5.77951	5.80111	5.82386	5.84772	5.87316	5.89975	5.9264	5.95157	5.97604	6.00074	6.02571	6.05107	6.07632	6.10088	6.12362	6.1449	6.16245	6.17756	6.19368	6.21127	6.22732	6.24238	6.2539	6.26415	6.27319	6.28233	6.2925	6.30265	6.31135	6.31905	6.32558	6.33139	6.33695	6.3426	6.34859	6.35502	6.36163	6.36635	6.37136	6.37786	6.38434	6.39046	6.39644
8	3	7.29957	7.29797	7.30289	7.31865	7.31316	7.28312	7.24694	7.21705	7.19054	7.16887	7.1296	7.08434	7.03653	7.0003	6.98508	6.98358	6.97662	6.96635	6.9474	6.93504	6.92844	6.91686	6.89945	6.88239	6.86647	6.85047	6.8344	6.81645	6.79814	6.77971	6.76306	6.74907	6.73592	6.72212	6.70632	6.68817	6.66953	6.65115	6.63457	6.62034	6.60784	6.59679	6.58574	6.57588	6.56931	6.5582	6.54176	6.52225
8	4	7.00144	7.01528	7.02792	7.03855	7.0467	7.05302	7.05836	7.06294	7.06684	7.06977	7.07104	7.07131	7.06913	7.06553	7.06164	7.05744	7.05296	7.04846	7.04404	7.03972	7.03549	7.03147	7.02714	7.02137	7.01356	7.00551	6.99732	6.99006	6.98254	6.9743	6.96583	6.95767	6.95024	6.94494	6.94123	6.93937	6.93867	6.93853	6.93881	6.93974	6.94156	6.94414	6.9469	6.94884	6.94845	6.9483	6.94892	6.95029
8	5	5.86467	5.90974	5.95439	5.99837	6.04187	6.08515	6.12853	6.17249	6.21745	6.26384	6.31114	6.35881	6.40695	6.45514	6.50305	6.5519	6.60467	6.65773	6.70925	6.75813	6.80489	6.84577	6.88066	6.91088	6.9343	6.95265	6.96782	6.9764	6.97888	6.97256	6.95946	6.9433	6.92496	6.903	6.87936	6.85376	6.82809	6.80259	6.77764	6.75331	6.7294	6.70571	6.68093	6.65614	6.63176	6.6083	6.58571	6.56463
8	6	6.13024	6.13532	6.14039	6.14547	6.15103	6.15709	6.16345	6.17	6.17638	6.18252	6.18838	6.19414	6.19983	6.20543	6.21093	6.21635	6.22181	6.22737	6.23325	6.23915	6.24505	6.25121	6.25762	6.26409	6.27048	6.27612	6.28128	6.28568	6.29012	6.29481	6.29997	6.3056	6.31142	6.31727	6.32325	6.32937	6.33551	6.34155	6.34713	6.35231	6.35744	6.36247	6.36692	6.3712	6.37525	6.37941	6.38374	6.38836
8	7	6.56129	6.58293	6.60515	6.62831	6.65252	6.67742	6.7022	6.72616	6.74969	6.77259	6.79481	6.8169	6.83946	6.86178	6.88319	6.90356	6.92237	6.93969	6.95246	6.9641	6.97498	6.9847	6.99319	7.00034	7.00555	7.00989	7.01368	7.0161	7.01704	7.0158	7.01298	7.00954	7.00565	7.00093	6.99531	6.98864	6.98052	6.9716	6.96197	6.95184	6.9417	6.93158	6.92153	6.91178	6.90283	6.89635	6.89218	6.88914
9	1	5.30439	5.31371	5.32437	5.33984	5.35682	5.3734	5.3892	5.40378	5.41751	5.43127	5.44504	5.45889	5.47215	5.48283	5.49188	5.50261	5.51547	5.52832	5.54118	5.55433	5.56763	5.58082	5.59388	5.60688	5.61975	5.63241	5.64464	5.65617	5.66714	5.67785	5.68847	5.69915	5.70996	5.72071	5.73103	5.74075	5.74943	5.75799	5.76675	5.77477	5.78113	5.78661	5.78967	5.79317	5.80022	5.80685	5.81094	5.81699
9	2	5.30439	5.30439	5.30287	5.29591	5.27901	5.2471	5.20549	5.16813	5.13421	5.10986	5.08797	5.06633	5.04468	5.02304	5.0014	4.97976	4.95815	4.93687	4.91585	4.90809	4.90656	4.90745	4.90949	4.91335	4.92056	4.92777	4.93499	4.9422	4.94942	4.95663	4.96384	4.97106	4.97811	4.98418	4.98524	4.98599	4.9862	4.98664	4.98753	4.98794	4.9869	4.98466	4.97596	4.96692	4.95865	4.95081	4.94356	4.9362
9	3	5.70855	5.72021	5.73153	5.74165	5.75119	5.76042	5.76961	5.77928	5.78934	5.80101	5.81309	5.82442	5.83543	5.84612	5.85665	5.86748	5.87869	5.88997	5.90129	5.91274	5.92426	5.93567	5.94683	5.95728	5.96655	5.97665	5.98847	6.0005	6.01271	6.02498	6.03725	6.05041	6.06551	6.08085	6.09678	6.11275	6.1288	6.14478	6.16068	6.17652	6.19236	6.20808	6.22263	6.23689	6.24995	6.26226	6.27356	6.28515
9	4	6.2818	6.28091	6.28042	6.28137	6.28264	6.28357	6.28408	6.28421	6.28418	6.28643	6.28927	6.29224	6.29511	6.29755	6.29962	6.30176	6.30394	6.30587	6.30761	6.30892	6.31003	6.30911	6.3066	6.30464	6.30379	6.30269	6.3011	6.30049	6.3007	6.30094	6.30096	6.30111	6.30172	6.30241	6.30342	6.30442	6.30544	6.30722	6.30995	6.31437	6.32109	6.32915	6.34176	6.35551	6.37387	6.39403	6.41588	6.43928
9	5	5.5137	5.5357	5.55748	5.57844	5.59924	5.62031	5.64201	5.66483	5.68834	5.71024	5.73172	5.75236	5.77261	5.7923	5.81135	5.82993	5.84788	5.86551	5.88288	5.89853	5.91336	5.92715	5.94014	5.95278	5.96474	5.9761	5.98624	5.99536	6.00365	6.01127	6.01848	6.02537	6.03174	6.03751	6.04035	6.04306	6.04553	6.04801	6.0506	6.05343	6.05664	6.06014	6.06513	6.07028	6.07572	6.0811	6.08622	6.09106
9	6	6.03621	6.03153	6.02869	6.03245	6.03882	6.04564	6.05272	6.05962	6.0641	6.02044	5.96436	5.90454	5.84394	5.78333	5.72203	5.65881	5.59328	5.5288	5.46515	5.43348	5.41684	5.4039	5.39095	5.37801	5.36698	5.36804	5.39392	5.41981	5.4457	5.47735	5.51444	5.55327	5.59175	5.62817	5.65405	5.66779	5.66063	5.64769	5.63474	5.6218	5.60886	5.59702	5.59617	5.59937	5.62116	5.64705	5.67294	5.69882
9	7	5.71034	5.71532	5.72079	5.728	5.73649	5.7462	5.75738	5.76998	5.78356	5.79718	5.8108	5.82452	5.83847	5.85327	5.86945	5.88739	5.90775	5.93008	5.95394	5.97898	6.00453	6.02875	6.05156	6.07364	6.09437	6.1147	6.1342	6.15518	6.17737	6.19973	6.22191	6.23884	6.24439	6.24874	6.25055	6.25192	6.25253	6.25373	6.25593	6.25911	6.26317	6.26757	6.27196	6.27581	6.27662	6.27854	6.28425	6.29332
10	1	4.06054	4.12061	4.17835	4.23351	4.28119	4.32315	4.36294	4.40062	4.43644	4.469	4.49649	4.5196	4.53834	4.55057	4.55724	4.56201	4.56572	4.56811	4.56924	4.56985	4.57018	4.57021	4.5697	4.56746	4.56175	4.5543	4.54575	4.53913	4.53283	4.52656	4.52013	4.51394	4.5089	4.50502	4.50292	4.5014	4.50049	4.50115	4.5042	4.51049	4.52347	4.54992	4.5834	4.62654	4.67299	4.72133	4.7717	4.82687
10	2	5.84082	5.85589	5.87087	5.88577	5.8997	5.91319	5.92715	5.94239	5.96109	5.98004	5.99854	6.01594	6.03284	6.0496	6.06631	6.08302	6.09998	6.11766	6.13599	6.1544	6.17228	6.1897	6.20657	6.22163	6.2332	6.24376	6.25333	6.26053	6.26713	6.27346	6.27836	6.28166	6.28485	6.28781	6.2886	6.28973	6.29132	6.29615	6.30315	6.31075	6.31917	6.32926	6.33949	6.34932	6.35845	6.36764	6.37765	6.38889
10	3	5.71694	5.7824	5.82622	5.84626	5.8678	5.89147	5.9056	5.91101	5.92084	5.93267	5.94682	5.96511	5.983	5.99613	6.00577	6.0164	6.0284	6.04335	6.05988	6.07601	6.08858	6.10041	6.11391	6.13128	6.15534	6.17922	6.2039	6.23744	6.27159	6.30463	6.32886	6.34241	6.35387	6.36311	6.36737	6.36716	6.36189	6.3566	6.35595	6.36351	6.3789	6.39516	6.41141	6.4273	6.44369	6.45969	6.47413	6.48956
10	4	6.12411	6.13807	6.15276	6.16826	6.18496	6.20255	6.22063	6.23846	6.25323	6.26801	6.28357	6.30473	6.3302	6.36038	6.39264	6.42185	6.44613	6.45927	6.47198	6.48488	6.49903	6.5136	6.52701	6.53494	6.53212	6.52882	6.5256	6.52657	6.53289	6.54399	6.55592	6.5661	6.5756	6.58441	6.59239	6.60029	6.60814	6.6175	6.62792	6.63859	6.6498	6.66259	6.67669	6.69297	6.71287	6.73303	6.75038	6.76572
10	5	6.11404	6.12311	6.13403	6.147	6.16352	6.18202	6.20035	6.21891	6.24	6.26318	6.28927	6.31766	6.34479	6.36695	6.37879	6.37796	6.37186	6.36215	6.35009	6.33624	6.31891	6.29759	6.27286	6.2449	6.21223	6.17284	6.13213	6.12594	6.13312	6.14835	6.16501	6.18004	6.19744	6.21723	6.24029	6.26398	6.28833	6.31181	6.33422	6.35568	6.37043	6.36486	6.35637	6.34974	6.34519	6.3405	6.33345	6.32558
10	6	6.13105	6.14546	6.1621	6.18117	6.2022	6.22386	6.24508	6.26804	6.3011	6.33446	6.36583	6.38995	6.40725	6.41543	6.41581	6.41338	6.4094	6.40354	6.3932	6.37954	6.35954	6.33674	6.31464	6.29732	6.29027	6.28728	6.28728	6.28728	6.29185	6.30136	6.31977	6.34557	6.36975	6.39138	6.39201	6.39207	6.39207	6.39207	6.39134	6.38903	6.38378	6.37273	6.35387	6.3206	6.30157	6.291	6.28728	6.28728
10	7	5.89433	5.89433	5.89655	5.90121	5.909	5.91669	5.92052	5.92151	5.92703	5.93507	5.94628	5.96361	5.98621	6.01551	6.05201	6.0939	6.13953	6.19088	6.24728	6.30566	6.36465	6.42093	6.47335	6.52172	6.56386	6.59815	6.62428	6.62784	6.6209	6.60672	6.58619	6.56085	6.5327	6.50189	6.47108	6.44027	6.40946	6.37866	6.34976	6.32498	6.30312	6.27798	6.25081	6.22057	6.20344	6.19192	6.18166	6.17139
10	8	6.02081	6.05434	6.0774	6.08895	6.06714	6.02811	5.99764	5.97908	5.97015	5.9619	5.95246	5.94281	5.93308	5.92326	5.91999	5.93028	5.94822	5.97561	6.00319	6.03074	6.05793	6.08432	6.10985	6.13444	6.15773	6.18038	6.20239	6.22306	6.24283	6.26182	6.27847	6.29244	6.30566	6.31811	6.3294	6.33953	6.34835	6.35626	6.36339	6.36956	6.37447	6.37791	6.38058	6.3822	6.38357	6.38471	6.38543	6.38499
11	1	6.65677	6.67421	6.69165	6.70897	6.72621	6.74323	6.75996	6.77642	6.79205	6.80706	6.81859	6.82947	6.8391	6.84763	6.85452	6.85935	6.86419	6.86907	6.87847	6.89778	6.919	6.93972	6.96043	6.98197	7.00456	7.02739	7.05067	7.07305	7.09429	7.11596	7.1389	7.16056	7.17641	7.18662	7.19353	7.19774	7.20182	7.20604	7.21104	7.21712	7.22173	7.21879	7.21124	7.20143	7.19059	7.1803	7.17062	7.1621
11	2	6.80262	6.79729	6.79195	6.78629	6.78055	6.77513	6.76994	6.76385	6.75498	6.74629	6.73864	6.73117	6.72406	6.71758	6.71274	6.70905	6.70105	6.68179	6.66286	6.64468	6.62759	6.61251	6.59829	6.58283	6.56583	6.54855	6.5308	6.51952	6.51652	6.51698	6.5186	6.52419	6.53847	6.56111	6.58635	6.61375	6.6418	6.67023	6.70057	6.73349	6.76832	6.80485	6.84241	6.8712	6.896	6.91814	6.9388	6.96024
11	3	5.65198	5.62116	5.59228	5.60768	5.63978	5.67425	5.71115	5.7466	5.77759	5.80939	5.8459	5.88288	5.91985	5.95502	5.98356	6.00283	6.01832	6.02395	6.02684	6.02372	6.01824	6.01049	6.00124	5.992	5.98275	5.97351	5.96427	5.94937	5.92723	5.90183	5.87504	5.84846	5.825	5.80478	5.79031	5.78059	5.77135	5.7621	5.75286	5.74361	5.73637	5.73635	5.74077	5.74832	5.75728	5.76515	5.77195	5.77641
11	4	6.49367	6.53411	6.57364	6.59263	6.60376	6.61278	6.6192	6.62405	6.624	6.62332	6.61908	6.61397	6.60676	6.5985	6.59047	6.5834	6.57946	6.58364	6.58697	6.58841	6.58904	6.58881	6.58738	6.58426	6.57889	6.57225	6.56334	6.55537	6.54861	6.54318	6.53924	6.53663	6.53493	6.53411	6.53391	6.53422	6.53551	6.53765	6.54159	6.54768	6.55391	6.55627	6.55627	6.55889	6.56269	6.5669	6.57125	6.57696
11	5	6.49752	6.50799	6.51848	6.52945	6.54067	6.55265	6.56555	6.57876	6.593	6.60743	6.623	6.63887	6.65551	6.67254	6.68946	6.70618	6.72257	6.7381	6.75366	6.76929	6.7846	6.79917	6.81341	6.82802	6.84313	6.85856	6.87453	6.89163	6.91016	6.92863	6.94626	6.96338	6.98064	6.99795	7.01369	7.02812	7.04125	7.0533	7.06414	7.07382	7.08284	7.09185	7.10084	7.10996	7.11914	7.12754	7.13532	7.14309
12	1	5.6349	5.68683	5.73876	5.79061	5.84242	5.86629	5.85506	5.83666	5.80099	5.76282	5.70806	5.64918	5.59684	5.54994	5.51063	5.48347	5.46089	5.44586	5.43362	5.45145	5.48646	5.52919	5.57536	5.62305	5.67074	5.71844	5.73317	5.72832	5.72346	5.72176	5.72252	5.72525	5.72965	5.73492	5.7412	5.74782	5.75484	5.76197	5.76912	5.77633	5.78369	5.79131	5.79934	5.80825	5.81747	5.82728	5.83773	5.84931
12	2	5.63164	5.63949	5.64733	5.64586	5.64059	5.638	5.63903	5.64058	5.64294	5.64543	5.64924	5.65337	5.66126	5.67192	5.68292	5.6933	5.70333	5.71175	5.71957	5.72805	5.73693	5.74626	5.75601	5.76641	5.77821	5.79088	5.78782	5.7754	5.7645	5.75665	5.74909	5.73959	5.72832	5.71554	5.70098	5.68577	5.66979	5.6636	5.67454	5.6988	5.72836	5.76508	5.80516	5.85232	5.89965	5.94661	5.99414	6.0438
12	3	5.23176	5.25707	5.28238	5.29896	5.312	5.32034	5.32302	5.32359	5.31703	5.30944	5.28692	5.2607	5.23202	5.20198	5.17144	5.14059	5.10917	5.07302	5.03515	4.99718	4.95922	4.92381	4.89148	4.86323	4.84301	4.82782	4.82094	4.819	4.81665	4.81309	4.80845	4.8028	4.79693	4.79375	4.79375	4.79375	4.79375	4.793	4.79094	4.78739	4.78207	4.77448	4.76689	4.7593	4.75284	4.74887	4.74661	4.74632
12	4	5.13327	5.20303	5.27279	5.31782	5.35281	5.38274	5.40696	5.43025	5.45173	5.47295	5.48422	5.49302	5.47596	5.43981	5.3988	5.35714	5.31503	5.27029	5.22459	5.17626	5.12646	5.07623	5.02601	4.97578	4.92556	4.87533	4.86664	4.8826	4.91174	4.95039	4.99212	5.03181	5.07175	5.12023	5.17883	5.23742	5.29602	5.35608	5.41864	5.48042	5.53527	5.58041	5.61752	5.63779	5.66066	5.691	5.72234	5.74728
12	5	6.20511	6.20511	6.20511	6.21057	6.21824	6.22856	6.24208	6.25483	6.26274	6.26994	6.29101	6.31552	6.34689	6.38296	6.42184	6.46402	6.50758	6.55455	6.60277	6.65127	6.6999	6.74659	6.79088	6.83409	6.87731	6.92053	6.95682	6.98901	7.01071	7.02234	7.02514	7.01979	7.00753	6.99162	6.97138	6.94767	6.91994	6.8929	6.86888	6.84694	6.82514	6.80354	6.78199	6.76057	6.74086	6.72488	6.71395	6.71333
12	6	6.08344	6.08344	6.08344	6.08344	6.08344	6.08344	6.08344	6.08344	6.08344	6.08344	6.08344	6.08344	6.08344	6.08344	6.08344	6.08344	6.08344	6.08344	6.08344	6.08344	6.08344	6.08344	6.08344	6.08324	6.08245	6.08128	6.07734	6.07176	6.06498	6.05723	6.04823	6.0377	6.02602	6.01434	6.00266	5.99098	5.9793	5.96762	5.95594	5.94426	5.93258	5.92089	5.90921	5.89753	5.88614	5.87536	5.86551	5.85763
13	1	5.24996	5.24943	5.2489	5.24837	5.24927	5.25285	5.25936	5.26817	5.2786	5.28906	5.29953	5.31019	5.32093	5.33166	5.34247	5.35352	5.36486	5.37636	5.38797	5.39972	5.41154	5.42374	5.43625	5.44878	5.46129	5.47372	5.48596	5.49817	5.51035	5.52298	5.53605	5.54981	5.56479	5.57984	5.59489	5.61037	5.62659	5.64305	5.65956	5.67594	5.69197	5.70782	5.72309	5.73832	5.75354	5.76876	5.78399	5.79921
13	2	5.97919	5.99239	6.00562	6.01897	6.03253	6.04644	6.06092	6.0762	6.09207	6.10838	6.12481	6.1421	6.15975	6.17784	6.19637	6.21506	6.2338	6.25076	6.26633	6.2813	6.29602	6.30988	6.32262	6.33321	6.33989	6.34686	6.35441	6.3612	6.36736	6.3723	6.37627	6.3798	6.38308	6.38659	6.39142	6.39689	6.40344	6.41112	6.41981	6.42957	6.44032	6.45155	6.46384	6.47628	6.48917	6.50216	6.51515	6.52713
13	3	6.57945	6.5552	6.53189	6.51198	6.49503	6.48137	6.47075	6.46153	6.4537	6.45453	6.4576	6.46914	6.48299	6.49592	6.50803	6.52022	6.53244	6.54402	6.55509	6.56598	6.5768	6.58582	6.5936	6.60264	6.61426	6.62655	6.64017	6.65323	6.66582	6.67705	6.68713	6.69625	6.70419	6.71268	6.72441	6.74439	6.77851	6.81808	6.85953	6.90353	6.95057	6.99902	7.04989	7.101	7.15242	7.20109	7.24384	7.27895
13	4	6.00297	6.0112	6.02093	6.0361	6.0527	6.06834	6.08371	6.10027	6.11758	6.13279	6.14745	6.16367	6.18054	6.19801	6.21611	6.23451	6.25314	6.27052	6.28692	6.3065	6.3276	6.34728	6.36537	6.38304	6.39996	6.41621	6.43111	6.44717	6.46419	6.47896	6.49134	6.50216	6.51119	6.5197	6.52608	6.53213	6.53761	6.54156	6.54383	6.54614	6.55035	6.55511	6.55815	6.56116	6.5648	6.56887	6.57359	6.57869
13	5	5.39674	5.42043	5.44408	5.46758	5.49085	5.51378	5.53633	5.55854	5.58047	5.60161	5.62255	5.64236	5.66176	5.6809	5.70015	5.72031	5.74157	5.76235	5.78275	5.80089	5.81799	5.83674	5.85704	5.87685	5.89547	5.913	5.92832	5.94139	5.95262	5.96179	5.96953	5.97667	5.98333	5.9893	5.99183	5.99419	5.99625	5.99759	5.99815	5.99862	5.99974	6.00115	6.003	6.00488	6.00676	6.0087	6.01076	6.01303
13	6	6.18762	6.21248	6.2371	6.26086	6.28433	6.30781	6.33416	6.3678	6.40677	6.4504	6.49524	6.53993	6.5844	6.62832	6.67124	6.71265	6.75191	6.78863	6.82335	6.84405	6.85818	6.8698	6.88054	6.8907	6.89982	6.9087	6.91713	6.92581	6.93469	6.94305	6.95085	6.95809	6.96451	6.97086	6.9771	6.98339	6.98974	6.99633	7.00317	7.01034	7.01784	7.02557	7.0343	7.04295	7.05067	7.05681	7.06004	7.06013
13	7	6.98211	7.00142	7.02019	7.03698	7.054	7.07279	7.09237	7.11059	7.12759	7.13927	7.14956	7.15823	7.16626	7.17357	7.18013	7.18632	7.19201	7.19736	7.20246	7.21169	7.22287	7.23737	7.25424	7.27096	7.28717	7.30338	7.31959	7.3363	7.35343	7.3712	7.38946	7.4076	7.42514	7.44254	7.45935	7.47606	7.49256	7.5071	7.51928	7.53006	7.54057	7.55063	7.55716	7.56318	7.56779	7.57179	7.57517	7.57794
14	1	5.74145	5.73899	5.73653	5.74166	5.75044	5.75906	5.76669	5.7739	5.78065	5.78712	5.79468	5.80315	5.81194	5.82089	5.82948	5.83664	5.84159	5.84599	5.84798	5.8496	5.8486	5.84641	5.84409	5.84156	5.83927	5.8385	5.83806	5.83332	5.82657	5.81872	5.81017	5.80385	5.80452	5.81214	5.82652	5.85118	5.87621	5.89956	5.92186	5.94322	5.96339	5.98505	6.01787	6.05068	6.08198	6.11283	6.13197	6.1393
14	2	6.12618	6.12057	6.11496	6.11336	6.1137	6.11418	6.11444	6.11465	6.11489	6.11517	6.11622	6.11793	6.11999	6.12236	6.1249	6.12737	6.12978	6.13257	6.13702	6.14183	6.14952	6.15853	6.16858	6.18018	6.19189	6.20395	6.21607	6.22783	6.23942	6.25126	6.26345	6.27513	6.285	6.2931	6.29972	6.30412	6.30729	6.30797	6.30721	6.30553	6.30258	6.29956	6.29606	6.29256	6.28857	6.28443	6.28168	6.28035
14	3	6.04638	6.06884	6.09129	6.11175	6.13126	6.14978	6.16712	6.18416	6.20158	6.21922	6.23728	6.25571	6.27417	6.29254	6.31061	6.3279	6.34399	6.35997	6.37547	6.39096	6.40662	6.42236	6.43844	6.45502	6.47127	6.48517	6.49859	6.51046	6.5216	6.53162	6.54055	6.54885	6.55687	6.56459	6.57154	6.5773	6.58237	6.58599	6.58825	6.58731	6.58186	6.57601	6.56724	6.55847	6.5474	6.53565	6.52172	6.50566
14	4	5.7588	5.77422	5.78963	5.80407	5.81804	5.83115	5.84316	5.85498	5.86761	5.88073	5.89327	5.90533	5.91752	5.93013	5.9429	5.95537	5.96737	5.97938	5.99147	6.00357	6.01584	6.02819	6.04105	6.05468	6.06846	6.08296	6.0976	6.1109	6.12358	6.13572	6.14744	6.15852	6.16841	6.17708	6.18371	6.18721	6.18956	6.18976	6.18891	6.18823	6.18777	6.18703	6.18423	6.18144	6.18219	6.18397	6.19282	6.20871
14	5	6.39684	6.40509	6.41333	6.42206	6.43101	6.44075	6.45154	6.46317	6.47712	6.49246	6.50759	6.52256	6.53835	6.55556	6.57323	6.58937	6.60221	6.60492	6.56293	6.51842	6.46982	6.41935	6.37187	6.32878	6.28541	6.2389	6.19174	6.14832	6.10665	6.09719	6.125	6.17169	6.2199	6.26947	6.31749	6.36316	6.4105	6.46265	6.5155	6.55964	6.59132	6.61935	6.62013	6.62091	6.61618	6.60985	6.6013	6.59069
14	6	7.13377	7.14526	7.15676	7.16968	7.18328	7.19709	7.21105	7.22525	7.24025	7.25575	7.27278	7.29109	7.31046	7.33107	7.35277	7.37542	7.39948	7.42343	7.44688	7.47059	7.49731	7.5254	7.55365	7.58214	7.6101	7.63474	7.65866	7.67916	7.69805	7.71553	7.73183	7.74701	7.76071	7.77294	7.78376	7.7924	7.80071	7.80874	7.8166	7.82437	7.83202	7.83959	7.84668	7.85378	7.86006	7.86611	7.87134	7.87576
[truncated: 78 more columns]
