# Supplementary material for: Spinal lumbar dI2 interneurons contribute to stability of bipedal stepping
Source: eLife. 2021 Aug 16;10:e62001. doi: 10.7554/eLife.62001 (PMC8448531; doi:10.7554/eLife.62001)
Supplement: Figure 6—source data 2. — The TMP angle trajectories during the normalized swing in all the analyzed steps of all chicks (Figure 6E). [file elife-62001-fig6-data2.xlsx]

## Sheet: Control1.xls
Session	Step	1	2	3	4	5	6	7	8	9	10	11	12	13	14	15	16	17	18	19	20	21	22	23	24	25	26	27	28	29	30	31	32	33	34	35	36	37	38	39	40	41	42	43	44	45	46	47	48
1	1	48.9004	48.9458	48.9911	49.1257	49.3013	49.6968	50.4664	51.2165	51.6365	52.0564	52.2265	52.309	52.4318	52.6089	52.8005	53.1079	53.4154	53.4755	53.4723	52.9091	51.7428	50.7636	50.7198	50.6759	49.288	47.6664	46.3156	45.1983	44.2533	43.9108	43.5683	43.6813	43.8408	44.2138	44.7336	45.3205	46.0819	46.8434	47.4786	48.1089	48.8742	49.7127	50.2023	49.9942	49.7929	49.9522	50.1115	50.9345
1	2	73.1762	72.5237	71.8711	70.7766	69.4789	68.25	67.1377	66.045	65.2833	64.5216	63.9166	63.3665	62.8689	62.4422	62.0461	61.8954	61.7448	62.022	62.4087	62.9366	63.6167	64.2778	64.8437	65.4096	66.7744	68.2783	69.7389	71.1623	72.4921	73.4942	74.4963	74.6766	74.773	74.1402	73.006	71.6297	69.6235	67.6174	65.6223	63.6276	61.4222	59.1024	56.5714	53.6181	50.6504	46.921	43.1916	40.401
1	3	57.9442	56.9515	55.9587	55.0561	54.195	53.4036	52.7306	52.0716	51.6487	51.2258	50.9413	50.7052	50.54	50.4703	50.4124	50.4487	50.4851	50.3793	50.2372	50.0349	49.7678	49.3875	48.4414	47.4953	46.4827	45.4586	44.3746	43.239	42.1575	41.2652	40.3728	39.5614	38.7582	37.6746	36.3982	34.9643	33.121	31.2777	29.7359	28.2056	26.8173	25.5061	24.2938	23.2792	22.2704	21.5622	20.854	20.4538
1	4	57.9176	57.2003	56.483	55.892	55.3591	54.9003	54.5672	54.248	54.1654	54.0829	54.353	54.7466	55.316	56.1224	56.9407	57.855	58.7693	59.758	60.7657	61.876	63.0968	63.9604	63.038	62.1155	60.902	59.6378	58.4896	57.4415	56.3497	55.1051	53.8606	52.0844	50.2541	47.9961	45.4442	42.6836	39.3805	36.0773	32.4651	28.8411	27.0321	26.2085	25.5723	25.3109	25.0562	25.1573	25.2584	25.8897
2	1	56.1339	55.9943	55.8548	55.7763	55.7259	55.6119	55.3898	55.1391	54.4043	53.6695	53.0114	52.3803	51.92	51.6899	51.5215	51.8457	52.17	53.1884	54.3843	55.3857	56.1775	56.8425	56.8733	56.9041	56.3553	55.7058	54.8532	53.8258	52.6135	50.7543	48.8952	46.3542	43.7436	40.731	37.442	34.0371	30.3307	26.6242	24.3876	22.2076	20.6784	19.5026	18.6292	18.3603	18.1158	19.1611	20.2064	21.8938
2	2	57.4356	57.3082	57.1809	57.3036	57.5414	57.8868	58.4151	58.9557	59.7034	60.4511	61.4223	62.4717	63.3703	64.0657	64.7543	65.3892	66.0241	67.1038	68.2971	68.8781	68.7997	68.6267	67.9816	67.3365	66.4625	65.5487	64.8051	64.2082	63.0995	60.1992	57.2989	53.8003	50.2406	46.6044	42.9158	39.4221	36.4356	33.4491	31.4303	29.4487	27.0473	24.418	21.53	18.1247	14.7732	14.2725	13.7719	14.2261
2	3	64.5385	64.6124	64.6863	64.8291	65.0036	65.2306	65.5471	65.875	66.3965	66.918	66.8988	66.6904	66.293	65.6408	64.9509	63.9583	62.9658	61.8055	60.6024	59.2538	57.7485	56.1841	54.3243	52.4646	50.3114	48.1072	45.7269	43.195	40.622	37.9055	35.1891	33.0487	30.9671	29.3597	28.0785	27.0064	26.4784	25.9504	26.7882	27.6785	29.1854	31.0272	33.1469	35.8221	38.5147	42.1247	45.7347	49.4736
2	4	67.4285	66.734	66.0394	65.5764	65.2198	64.984	64.9535	64.9417	65.2477	65.5536	65.9183	66.3035	66.6303	66.8785	67.1252	67.3602	67.5952	68.0236	68.5015	69.0481	69.6686	70.2202	70.4278	70.6355	70.3971	70.0813	69.3944	68.3876	67.2279	65.533	63.838	61.7394	59.5996	57.2566	54.7738	52.2605	49.6674	47.0744	44.4624	41.8497	39.5057	37.3075	35.3129	33.7256	32.1546	31.4507	30.7467	30.7841
2	5	81.6165	80.7463	79.8761	79.0514	78.2475	77.4189	76.5485	75.6647	74.5556	73.4465	72.1196	70.7166	69.2939	67.8448	66.3957	64.9474	63.499	62.1014	60.7169	59.35	58.0024	56.6617	55.3565	54.0513	52.8212	51.6041	50.5089	49.5187	48.6361	48.1299	47.6236	47.5365	47.4922	47.6737	48.0104	48.3545	48.7175	49.0806	49.5873	50.0996	50.6194	51.1433	51.657	52.1504	52.6439	53.145	53.646	54.221
3	1	53.7523	54.0159	54.2795	54.5558	54.8378	55.1303	55.4404	55.7663	56.359	56.9517	57.6065	58.2829	58.9476	59.5967	60.2562	60.9995	61.7427	62.5519	63.378	64.2681	65.227	66.1899	67.1725	68.1551	69.1354	70.1155	70.8542	71.3848	71.8754	72.2255	72.5755	73.2907	74.0431	74.5945	75.0076	75.2658	75.1214	74.977	73.6634	72.3049	70.6154	68.7461	66.8783	65.0136	63.1511	61.4101	59.6691	57.9641
3	2	47.1317	47.1752	47.2186	47.2328	47.2336	47.2351	47.238	47.2434	47.2901	47.3369	47.4327	47.5456	47.6852	47.8608	48.0321	48.1694	48.3067	48.3662	48.4059	48.6142	49.0042	49.3564	49.52	49.6836	49.6841	49.6564	49.6224	49.5831	49.6901	50.3087	50.9274	52.2149	53.5707	55.0962	56.7386	58.3921	60.0748	61.7575	64.211	66.6942	69.4401	72.3287	75.1529	77.8485	80.5358	82.7812	85.0266	86.8802
3	3	65.6235	66.6952	67.7669	67.8787	67.5495	66.8367	65.4717	64.1178	62.9517	61.7856	60.4603	59.0792	57.556	55.8412	54.0582	51.7291	49.4	46.7038	43.9138	41.4409	39.3097	37.3888	36.5196	35.6503	34.4029	33.0897	31.5603	29.8446	28.1039	26.2759	24.4478	23.6318	22.919	22.6072	22.571	22.6848	23.1885	23.6923	25.1873	26.7204	28.5401	30.5155	32.6135	34.957	37.3131	40.338	43.3629	46.5198
3	4	51.8114	51.4892	51.1669	50.9376	50.7509	50.6855	50.8263	50.9756	51.2689	51.5623	51.9352	52.3359	52.8016	53.3551	53.9126	54.5023	55.0919	55.6839	56.2765	56.6689	56.8455	56.9275	56.5363	56.1451	55.8297	55.5276	55.2814	55.0833	54.8583	54.5389	54.2194	53.7355	53.2349	52.5359	51.7006	50.8623	50.0162	49.1701	48.4144	47.6621	47.6076	47.9319	48.4518	49.3631	50.2739	51.1542	52.0345	52.9568
3	5	44.8501	44.8833	44.9165	44.9659	45.0228	45.0222	44.9241	44.8359	44.9163	44.9968	45.2145	45.4802	45.8318	46.2991	46.778	47.3491	47.9203	48.6996	49.5321	50.2533	50.8546	51.4812	52.2346	52.988	53.9655	54.9819	56.112	57.3402	58.5906	59.9184	61.2463	62.6345	64.0289	65.3323	66.5732	67.6507	68.3034	68.9562	69.1481	69.3224	69.4932	69.6621	69.908	70.3076	70.7088	71.1905	71.6722	71.816
3	6	43.4411	42.3914	41.3417	40.5257	39.8171	39.2368	38.8746	38.5315	38.5122	38.493	38.5935	38.7359	38.9055	39.1116	39.3223	39.569	39.8157	40.0853	40.3607	40.6601	40.9853	41.35	41.9115	42.4731	43.1018	43.7422	44.3461	44.9184	45.489	46.0541	46.6191	47.1859	47.7529	48.2786	48.776	49.2377	49.6066	49.9755	50.192	50.4026	50.3019	50.0322	49.6489	49.0383	48.4273	47.7937	47.1601	46.87
3	7	58.3058	59.8737	61.4417	62.8857	64.2728	65.5328	66.5768	67.5975	68.2209	68.8442	69.2175	69.5033	69.798	70.1048	70.305	69.6536	69.0023	67.6552	66.1302	64.676	63.2983	62.0083	61.1573	60.3063	59.6946	59.1245	58.4667	57.7332	56.7664	54.9828	53.1993	52.0648	50.9966	50.203	49.5983	49.0604	48.6964	48.3323	48.7536	49.205	50.1194	51.2851	52.9371	55.5618	58.194	61.2244	64.2548	67.0285
3	8	48.5502	48.268	47.9858	47.6753	47.3517	47.0972	46.96	46.8332	46.8837	46.9341	46.9286	46.9034	46.8719	46.832	46.8129	46.9609	47.1088	47.2434	47.3747	47.4738	47.5383	47.7508	48.704	49.6571	51.1899	52.8236	54.6167	56.5473	58.5373	60.7351	62.9329	65.0838	67.2301	68.8085	69.9966	70.8171	70.6818	70.5466	69.6792	68.7837	67.5793	66.2073	64.7924	63.2919	61.7934	60.4009	59.0084	57.6727
3	9	61.5904	60.9235	60.2565	59.4559	58.5938	57.7748	57.0292	56.2909	55.6793	55.0678	54.5409	54.0438	53.6151	53.2787	52.9623	52.8062	52.65	52.5467	52.4569	52.3438	52.2056	52.1019	52.1706	52.2393	52.2887	52.3347	52.5404	52.8836	53.2944	53.9415	54.5886	55.8431	57.1596	58.6024	60.1321	61.65	63.1374	64.6248	66.0511	67.475	68.7825	70.0267	71.1836	72.1661	73.1424	73.7915	74.4407	74.8677
3	10	58.3746	57.4389	56.5033	55.7048	54.9693	54.2058	53.3947	52.601	52.1011	51.6011	51.048	50.4762	49.9763	49.5733	49.1856	48.9211	48.6567	48.5359	48.4518	48.6037	49.0097	49.4228	49.8713	50.3199	50.5851	50.8184	50.9956	51.1245	51.2251	51.2267	51.2283	50.837	50.4057	49.9582	49.4997	49.0769	48.7471	48.4172	48.1208	47.8257	47.4772	47.0997	46.7475	46.4456	46.1437	45.837	45.5303	45.1508
4	1	55.0163	54.6577	54.299	54.4387	54.8074	55.1957	55.6174	56.0262	56.2146	56.403	56.5253	56.6246	56.8352	57.1958	57.5964	58.3166	59.0368	59.4688	59.8272	59.7969	59.3481	58.7521	57.4202	56.0883	54.8251	53.5738	52.5931	51.8455	51.2201	51.0221	50.8242	51.1644	51.5596	52.4024	53.5528	54.8104	56.3469	57.8834	58.6925	59.4736	59.7359	59.7166	59.4992	58.8855	58.2711	57.6137	56.9563	55.0263
4	2	59.9557	60.4132	60.8707	61.3392	61.8127	62.37	63.0697	63.7822	64.7125	65.6429	66.5722	67.5012	68.4221	69.3323	70.2136	70.8641	71.5145	71.2411	70.7313	69.6129	67.8389	66.0363	64.0902	62.1441	59.4022	56.522	53.8298	51.2996	48.9967	47.4897	45.9827	45.5256	45.1756	45.0359	45.0407	45.346	46.4322	47.5184	48.2123	48.8912	48.9961	48.7894	48.2489	47.0406	45.8229	44.1042	42.3855	39.9857
4	3	64.2606	65.1513	66.0419	67.0168	68.0302	69.1156	70.3234	71.5361	72.832	74.1278	75.2493	76.3098	77.2996	78.1943	79.0215	79.3099	79.5982	79.3873	79.0486	78.3552	77.28	76.0262	73.8796	71.733	68.39	64.8388	61.0985	57.1951	53.4248	50.1202	46.8156	44.5415	42.3726	40.7846	39.5961	38.832	39.1714	39.5108	40.2086	40.9202	41.7324	42.599	43.4628	44.3207	45.1736	45.7669	46.3601	47.3998
4	4	55.4232	55.7562	56.0892	56.4222	56.7552	57.3162	58.2649	59.2501	60.8584	62.4667	64.1108	65.7674	67.0906	67.9642	68.829	69.6231	70.4173	70.5781	70.577	70.1207	69.1742	68.1912	67.0261	65.8609	64.5259	63.1614	61.7732	60.3646	59.059	58.1136	57.1683	56.828	56.5495	56.4341	56.4308	56.7201	57.7705	58.8208	60.2415	61.6764	63.2883	64.9963	66.7705	68.6772	70.5862	72.6184	74.6506	76.4176
5	1	60.9558	60.1622	59.3685	58.7553	58.225	57.7804	57.4812	57.1866	56.9702	56.7538	56.5322	56.3088	56.0709	55.8135	55.5391	55.1282	54.7173	54.3822	54.0665	53.736	53.3897	53.0066	52.4398	51.873	50.7254	49.4766	48.1808	46.8444	45.5544	44.4271	43.2999	41.8208	40.3057	38.9679	37.7519	36.6824	35.9938	35.3052	34.6843	34.0659	34.0915	34.4666	35.1729	36.5415	37.8761	37.4094	36.9427	36.8235
5	2	55.5071	55.1115	54.7159	54.2287	53.6995	52.9894	51.9721	50.914	49.1621	47.4103	45.7133	44.0357	42.6001	41.4908	40.4198	39.6557	38.8916	38.267	37.6781	37.0092	36.2542	35.4911	34.6878	33.8845	33.2364	32.6154	32.05	31.5327	30.8559	29.6205	28.3851	27.8557	27.3983	26.9341	26.4652	25.9468	25.2998	24.6527	23.947	23.2391	22.4413	21.5946	20.8396	20.2679	19.6993	19.3033	18.9073	18.3926
5	3	52.3378	51.4865	50.6353	50.2004	49.9568	49.8424	49.9476	50.0681	50.4488	50.8295	50.9326	50.9386	51.1521	51.6453	52.1454	52.7006	53.2558	53.6907	54.0948	54.6092	55.2424	55.878	56.5259	57.1737	57.678	58.1573	58.4859	58.6847	59.1552	60.5767	61.9983	63.4333	64.8696	65.5039	65.5867	66.0505	67.5047	68.959	70.2895	71.6153	71.8775	71.5622	70.483	67.8758	65.2821	63.4021	61.522	59.2019
5	4	63.5915	64.1319	64.6722	65.1905	65.6987	66.201	66.6934	67.1751	67.4761	67.777	67.6221	67.3077	66.9896	66.6666	66.3295	65.8796	65.4298	65.0793	64.7542	64.5552	64.492	64.4679	64.6393	64.8107	65.1195	65.4523	65.3953	65.0023	64.3265	62.6608	60.9951	58.5189	55.96	54.212	53.0214	51.6883	49.9847	48.2811	46.5774	44.8737	43.4308	42.1295	41.2467	41.2007	41.2234	44.8912	48.559	50.6327
5	5	43.4622	42.9911	42.52	42.2521	42.0776	42.2162	42.8872	43.5775	44.5968	45.616	46.6539	47.6982	48.8349	50.096	51.3131	52.1787	53.0442	53.2065	53.1889	53.217	53.2941	53.352	53.3137	53.2754	53.0023	52.6883	52.7253	53.0648	53.4183	53.8209	54.2235	54.3642	54.4783	54.8907	55.5082	56.2027	57.0974	57.9921	60.3314	62.7263	64.4517	65.8136	67.3621	69.2836	71.175	71.4696	71.7642	71.4559
5	6	54.4673	54.8996	55.3319	55.7047	56.0501	56.2913	56.3553	56.4019	56.1522	55.9026	55.5304	55.1154	54.5724	53.8569	53.2712	53.7251	54.1789	55.0252	55.9718	57.018	58.1712	59.4276	61.1996	62.9715	63.8868	64.6532	66.0305	67.9346	69.6012	70.4371	71.2729	70.0659	68.6504	66.5803	64.0602	61.737	59.9259	58.1148	56.8154	55.5357	54.8157	54.3997	54.3425	55.003	55.6823	57.3595	59.0366	61.8699
5	7	52.6258	53.2618	53.8977	54.433	54.9221	55.646	56.7691	57.9089	59.3327	60.7565	62.0158	63.2176	64.2577	65.0798	65.897	66.6744	67.4517	68.8563	70.4213	71.6223	72.4312	73.291	74.4051	75.5193	76.6563	77.7972	78.7377	79.5053	80.2407	80.8631	81.4856	79.8945	78.0776	77.1307	76.782	76.1816	74.927	73.6724	72.4888	71.308	70.2668	69.3015	68.2475	67.0161	65.7802	64.3096	62.8391	61.656
6	1	63.3897	62.0474	60.7051	59.897	59.3343	58.4169	56.8962	55.3814	53.9683	52.5551	50.8275	48.9898	47.0386	44.9347	42.8246	40.6653	38.5061	37.477	36.737	36.2926	36.1664	36.0237	35.7983	35.573	35.8097	36.1268	36.6931	37.4744	38.238	38.9396	39.6413	40.2606	40.8715	42.2641	44.194	46.0011	47.4888	48.9766	50.0734	51.1552	52.1379	53.0668	53.6778	53.653	53.6274	53.5612	53.495	52.7175
6	2	49.1993	49.6059	50.0124	50.5657	51.1863	51.9852	53.0874	54.1961	55.4166	56.6372	57.8922	59.1594	60.4489	61.7683	63.0963	64.4927	65.8891	67.4718	69.1021	70.7519	72.4226	74.0636	75.5555	77.0474	78.2064	79.3075	80.1491	80.7671	81.347	81.7933	82.2396	82.4632	82.664	82.5169	82.1305	81.5499	80.4643	79.3788	78.3345	77.2918	76.2615	75.2379	73.8839	71.8691	69.8561	67.9347	66.0133	64.2399
6	3	50.345	50.8397	51.3345	51.8458	52.3649	52.8916	53.4315	53.9716	54.5152	55.0588	55.636	56.225	56.8543	57.5379	58.2527	59.218	60.1833	60.7932	61.3123	61.5324	61.4306	61.295	60.9911	60.6872	59.9605	59.1603	57.9576	56.4079	54.8496	53.2608	51.672	50.1263	48.585	46.8465	44.9725	43.1945	41.666	40.1376	39.1002	38.0817	37.3717	36.8294	36.7609	37.6401	38.5425	40.6719	42.8012	44.9826
6	4	56.2357	55.7969	55.358	55.0505	54.8034	54.6816	54.7731	54.8642	54.9497	55.0351	55.1156	55.1944	55.4031	55.7869	56.1908	56.7548	57.3188	57.9597	58.6203	59.2374	59.8078	60.3508	60.7576	61.1643	61.5012	61.826	61.9863	62.0049	61.8686	61.1904	60.5122	59.4675	58.3854	57.5637	56.921	56.2151	55.3452	54.4754	52.7324	50.9558	49.1465	47.3193	45.4773	43.6058	41.7263	39.4208	37.1154	35.189
6	5	42.3054	41.3065	40.3076	39.1938	38.0271	36.9737	36.1128	35.3206	35.6978	36.075	36.815	37.6821	38.5325	39.3604	40.1699	40.8314	41.4929	42.2203	42.9646	43.8169	44.7854	45.7283	46.5427	47.3571	47.5072	47.5417	47.1938	46.516	45.8852	45.4183	44.9514	45.1266	45.3673	45.8276	46.4388	46.9993	47.4276	47.856	47.9109	47.9515	47.9111	47.827	47.707	47.5156	47.3143	46.5958	45.8773	44.9926
6	6	54.3302	55.4704	56.6106	57.6939	58.7511	59.7775	60.7517	61.6994	62.1977	62.6959	62.9516	63.1223	63.1736	63.0639	62.9393	62.6954	62.4516	62.1319	61.7929	61.4002	60.9496	60.4601	59.7758	59.0916	58.3064	57.5036	56.801	56.1847	55.5779	55.0046	54.4312	53.7604	53.0797	52.6298	52.3385	52.144	52.201	52.2581	52.4145	52.5747	53.2105	54.1046	55.2585	56.9322	58.6156	60.8106	63.0056	65.2235
7	1	44.1434	44.5306	44.9179	45.6662	46.5805	47.6221	48.8801	50.1478	51.5809	53.0139	54.4949	55.9926	57.5575	59.2129	60.8572	62.4125	63.9677	65.2462	66.454	67.1072	67.1632	67.0439	66.0481	65.0522	63.3914	61.6148	59.5521	57.2427	54.9702	52.8269	50.6836	48.9152	47.1851	45.4825	43.7988	42.1369	40.5315	38.9261	37.7779	36.6472	36.1789	36.0702	36.1271	36.5155	36.9151	37.9121	38.9091	40.6274
7	2	63.8896	61.865	59.8405	57.83	55.8259	53.9486	52.287	50.6591	49.6042	48.5493	47.9214	47.4429	47.35	47.7768	48.2197	48.7918	49.3639	49.7441	50.0752	50.506	51.044	51.3368	50.4037	49.4706	48.1825	46.8327	45.4386	44.0063	42.4715	40.5778	38.6841	38.0612	37.568	37.2537	37.0623	36.9162	36.8876	36.859	37.426	38.0158	38.1612	38.0653	37.9228	37.6872	37.4459	36.9004	36.3548	35.2091
7	3	58.1304	58.2097	58.2889	58.6356	59.1052	59.7684	60.7607	61.7863	63.3784	64.9706	66.6788	68.4277	70.061	71.5387	72.9121	73.4513	73.9906	73.4929	72.7299	71.4426	69.5905	67.6495	65.2638	62.8782	60.3018	57.6924	54.9553	52.1082	49.0637	45.3282	41.5927	38.604	35.6915	33.1857	30.9593	28.9013	27.2807	25.6602	24.491	23.3393	22.9296	22.9228	23.3099	24.4848	25.6814	28.0294	30.3774	33.5385
7	4	60.5179	60.6726	60.8272	60.9985	61.1775	61.3833	61.6348	61.8926	62.2577	62.6229	63.0945	63.6033	64.1491	64.7447	65.3344	65.8774	66.4204	66.8261	67.1968	67.3302	67.2079	67.1259	67.2448	67.3637	66.8245	66.1709	64.9378	63.2053	61.3356	58.9857	56.6359	53.6071	50.5089	47.3336	44.1053	40.909	37.7961	34.6831	31.9383	29.2076	27.0019	25.0812	23.5099	22.6374	21.7869	22.1	22.4132	23.7154
7	5	61.8934	61.3554	60.8174	60.1953	59.5345	58.8443	58.1043	57.363	56.5998	55.8366	55.2968	54.8352	54.4427	54.1432	53.8691	53.7987	53.7282	53.8982	54.1298	54.6407	55.4525	56.2595	57.043	57.8265	58.5796	59.3274	60.0495	60.7496	61.4293	62.038	62.6466	62.9041	63.1257	63.3417	63.5538	63.753	63.9183	64.0837	63.7982	63.4953	62.2314	60.4457	58.7227	57.1251	55.5345	54.3174	53.1002	52.0406
8	1	54.0823	53.1047	52.1271	51.2613	50.4469	49.7042	49.0835	48.4854	48.2705	48.0556	47.837	47.617	47.3659	47.0729	46.7588	46.2764	45.7939	45.362	44.943	44.6476	44.4853	44.2981	43.9867	43.6754	43.1174	42.5166	41.4044	39.8515	38.457	37.6166	36.7762	36.3035	35.8683	35.5869	35.4114	35.1308	34.577	34.0233	33.1945	32.355	31.4701	30.5604	29.9066	29.7648	29.638	30.3093	30.9806	30.9478
8	2	55.5403	54.6144	53.6884	52.9239	52.2337	51.6299	51.1728	50.7284	50.4978	50.2673	50.2005	50.1911	50.5191	51.3019	52.0714	52.7346	53.3979	53.9481	54.4694	54.8882	55.1965	55.4348	55.3225	55.2103	55.0153	54.8058	54.6377	54.5052	54.4147	54.4712	54.5277	54.7968	55.0876	55.4827	55.9497	56.2722	56.2192	56.1662	56.4071	56.6592	57.0087	57.4111	57.8057	58.1849	58.564	58.9386	59.3131	59.8297
8	3	50.4148	50.5115	50.6081	50.6581	50.6865	50.7832	50.9959	51.2065	51.3803	51.5541	51.6521	51.7237	51.8066	51.9047	52.0144	52.2168	52.4192	52.5684	52.704	52.8632	53.0478	53.2448	53.5038	53.7627	54.01	54.2552	54.5736	54.9551	55.6208	57.2809	58.941	60.4763	61.9989	63.2492	64.3124	65.2739	65.9708	66.6678	65.7798	64.8308	63.1693	61.1209	58.945	56.5139	54.0696	50.9305	47.7913	45.5455
8	4	60.3722	61.6406	62.909	64.2667	65.6655	67.121	68.6727	70.2352	71.9801	73.7249	74.9037	75.8842	76.6715	77.1981	77.6631	77.6344	77.6057	76.9092	76.0419	75.0717	73.9907	72.7454	70.6784	68.6114	66.0623	63.4293	61.2716	59.5237	57.6468	55.3184	52.99	51.4739	50.0406	49.0322	48.3159	47.1581	44.8523	42.5466	40.6061	38.6797	36.8526	35.0794	33.408	31.9403	30.5117	31.1525	31.7933	31.5727
8	5	52.8577	53.0054	53.1532	53.5759	54.125	54.9343	56.1857	57.421	58.3811	59.3412	60.2041	61.0331	61.7687	62.3787	62.9102	62.8141	62.7179	61.947	61.0035	59.7139	58.0516	56.3475	54.434	52.5205	50.2562	47.9308	45.9493	44.2642	42.6977	41.5463	40.3948	40.4824	40.6965	41.1206	41.6891	42.4191	43.5687	44.7184	44.8722	44.9878	44.7204	44.245	43.5724	42.5051	41.4361	40.2824	39.1286	37.8684
8	6	57.0225	56.3856	55.7487	55.108	54.4655	53.8103	53.1334	52.4573	51.7964	51.1355	50.5056	49.8867	49.3565	48.946	48.5683	48.453	48.3377	48.1251	47.8876	47.6022	47.2654	46.8657	46.1513	45.4369	44.5779	43.6936	42.7615	41.788	40.8104	39.8184	38.8264	38.0129	37.2176	36.4277	35.6415	34.8602	34.0918	33.3234	32.7148	32.1123	31.8478	31.7666	31.9392	32.6192	33.3222	35.2475	37.1728	39.1727
[truncated: 78 more columns]

## Sheet: Control2.xls
Session	Step	1	2	3	4	5	6	7	8	9	10	11	12	13	14	15	16	17	18	19	20	21	22	23	24	25	26	27	28	29	30	31	32	33	34	35	36	37	38	39	40	41	42	43	44	45	46	47	48
1	1	41.5415	41.8148	42.088	42.3427	42.4161	42.4894	42.5631	42.638	42.7129	42.6014	42.0082	41.4149	41.0881	41.2108	41.3334	41.4246	41.4794	41.5343	41.6911	41.9286	42.1661	42.5721	43.0685	43.5648	43.9274	44.244	44.5605	44.5428	44.46	44.3773	44.2134	44.0434	43.8623	43.2126	42.5629	41.8159	40.3291	38.8424	37.3309	35.7256	34.1203	32.7275	31.8251	30.9227	30.2573	29.9543	29.6513	29.9965
1	2	47.4116	48.8653	50.3189	51.7855	53.3777	54.97	56.5231	57.9054	59.2876	60.5627	61.561	62.5592	63.3945	63.9547	64.5148	64.6695	64.3579	64.0463	63.1439	61.7737	60.4035	58.1873	55.5179	52.8485	49.7688	46.548	43.3272	40.7818	38.3677	35.9536	35.8939	36.0107	36.138	36.706	37.2741	37.9244	39.1998	40.4752	42.0872	44.9709	47.8545	51.2499	55.8262	60.4025	65.1043	69.998	74.8917	78.8949
1	3	48.8984	49.1558	49.4132	49.6766	49.9978	50.319	50.6974	51.3261	51.9547	52.5281	52.9587	53.3892	53.6826	53.7447	53.8067	53.6849	53.3517	53.0184	52.3262	51.3498	50.3733	48.8922	47.1408	45.3894	43.5288	41.6308	39.7327	38.4272	37.2368	36.0464	36.659	37.4068	38.1859	40.2785	42.3712	44.6346	48.1962	51.7577	55.5312	60.1056	64.68	69.22	73.6806	78.1412	82.2628	85.8659	89.469	92.6683
1	4	46.4855	46.8994	47.3133	47.7015	47.8392	47.9768	48.0457	47.814	47.5822	47.2343	46.5867	45.9391	45.2295	44.4154	43.6013	42.842	42.1458	41.4495	40.5666	39.536	38.5054	38.1872	38.2507	38.3142	38.9	39.6655	40.431	41.4433	42.5037	43.5641	45.3204	47.129	48.9585	51.6632	54.368	57.1124	60.1578	63.2033	66.2699	69.4162	72.5625	75.6557	78.6264	81.597	84.596	87.6384	90.6808	93.5487
2	1	50.7346	50.9261	51.1175	51.3204	51.6353	51.9501	52.3452	53.0919	53.8385	54.5475	55.1592	55.7708	56.243	56.4801	56.7171	56.9681	57.235	57.502	57.6406	57.6777	57.7148	57.1189	56.1841	55.2492	53.9014	52.4117	50.922	49.8696	48.9022	47.9349	47.2498	46.5859	45.9175	45.0594	44.2013	43.4336	43.3531	43.2727	44.0194	47.8911	51.7627	56.1102	61.5555	67.0007	72.0856	76.6192	81.1528	85.2094
2	2	37.3019	36.3445	35.3871	34.4426	33.6235	32.8045	32.0944	31.8611	31.6278	31.4744	31.5274	31.5804	31.5453	31.3616	31.1779	30.915	30.5611	30.2072	29.7927	29.3301	28.8675	28.3652	27.8416	27.3179	26.9519	26.6401	26.3283	26.638	27.0685	27.4991	29.2168	31.0311	32.8775	36.073	39.2686	42.4378	45.4069	48.376	51.5274	55.3678	59.2081	63.2018	67.5492	71.8967	76.016	79.7864	83.5567	86.7382
2	3	57.6097	57.3779	57.146	56.9034	56.5553	56.2072	55.9426	56.043	56.1434	56.2605	56.4211	56.5816	56.5636	56.2442	55.9249	55.4778	54.8839	54.2899	53.6583	52.9967	52.3352	51.8515	51.463	51.0746	50.7076	50.3481	49.9886	49.2375	48.4101	47.5828	46.637	45.6823	44.7213	43.4956	42.2699	41.0144	39.5321	38.0499	36.4837	34.6006	32.7174	31.327	31.0737	30.8205	31.2105	32.5843	33.958	36.0657
2	4	79.0788	79.6679	80.257	80.7722	80.5661	80.36	80.0423	79.2358	78.4293	77.5301	76.391	75.2519	74.0716	72.8216	71.5717	70.2697	68.908	67.5463	65.7413	63.5854	61.4295	59.0947	56.6641	54.2334	52.204	50.3124	48.4208	46.6082	44.8111	43.0139	40.7805	38.5145	36.2416	33.6807	31.1197	28.6072	26.463	24.3188	22.4387	21.5566	20.6745	20.3779	21.4322	22.4866	23.9233	25.9447	27.9661	30.5331
2	5	52.7597	52.2537	51.7477	51.245	50.774	50.3031	49.9123	49.8724	49.8324	49.8515	50.0231	50.1947	50.3218	50.374	50.4262	50.4149	50.3307	50.2465	50.2776	50.4001	50.5225	50.8255	51.2252	51.625	52.0864	52.5691	53.0518	53.4377	53.8049	54.172	54.3447	54.5029	54.6603	54.7859	54.9116	54.9597	54.4182	53.8767	53.2374	52.2287	51.2199	50.2339	49.3003	48.3668	47.4783	46.6589	45.8394	45.6481
3	1	37.9491	37.8074	37.6656	37.5	37.1019	36.7038	36.2228	35.3791	34.5354	33.8524	33.5848	33.3171	33.1968	33.3249	33.4531	33.9188	34.7727	35.6265	36.6307	37.7538	38.877	40.0603	41.2759	42.4915	43.9197	45.4209	46.9222	48.7543	50.6507	52.5471	55.4061	58.3372	61.2832	64.8546	68.426	71.9581	75.1921	78.4261	81.5817	84.4411	87.3004	90.0564	92.5738	95.0913	97.5615	99.9596	102.358	104.674
3	2	51.0258	51.1317	51.2377	51.3434	51.4461	51.5488	51.6261	51.5925	51.5589	51.5095	51.419	51.3285	51.2721	51.2734	51.2747	51.3418	51.4847	51.6275	51.3721	50.8014	50.2306	49.1782	47.8677	46.5573	45.2694	43.9893	42.7092	41.8499	41.0725	40.295	39.8884	39.5096	39.1349	38.9318	38.7287	38.6607	39.6193	40.578	41.9724	45.0126	48.0529	51.3742	55.3442	59.3142	63.3037	67.323	71.3424	75.4337
3	3	45.8539	45.656	45.4581	45.2925	45.4417	45.5909	45.6584	45.3681	45.0779	44.5561	43.4365	42.3169	40.957	39.1915	37.4261	35.865	34.5389	33.2127	32.0361	30.9778	29.9196	29.2344	28.7492	28.264	28.4362	28.8345	29.2329	30.4958	31.9268	33.3579	35.7933	38.3041	40.8329	44.1205	47.4081	50.7446	54.4531	58.1615	61.9068	65.7914	69.676	73.4964	77.1688	80.8413	84.3584	87.6378	90.9173	94.0597
3	4	49.6201	49.5141	49.4081	49.29	49.054	48.8181	48.6412	48.7223	48.8034	48.9242	49.1474	49.3706	49.5195	49.5429	49.5664	49.4996	49.3291	49.1586	49.1174	49.1786	49.2398	49.0855	48.8156	48.5457	48.4765	48.4762	48.4759	48.7886	49.1622	49.5358	49.5346	49.5054	49.463	48.8654	48.2678	47.7479	47.818	47.888	48.0932	48.8089	49.5246	50.1056	50.3757	50.6457	51.7929	54.2817	56.7705	60.7134
3	5	54.1275	54.4509	54.7743	55.0206	54.5144	54.0083	53.3366	51.9404	50.5443	49.2517	48.2268	47.2019	46.038	44.6398	43.2416	41.8486	40.4617	39.0748	37.9685	37.0842	36.2	36.9699	38.6258	40.2818	42.8787	45.799	48.7194	52.0854	55.5381	58.9908	62.7087	66.4465	70.1836	73.8896	77.5955	81.1997	84.0298	86.86	89.4133	90.9208	92.4284	93.9995	95.7171	97.4348	99.2102	101.074	102.938	104.536
4	1	53.4189	53.9119	54.4049	54.9159	55.6025	56.2891	56.8435	56.8197	56.796	56.7382	56.5925	56.4469	56.1382	55.5545	54.9708	53.9764	52.5097	51.043	49.6631	48.3519	47.0407	45.6628	44.2491	42.8355	42.0831	41.5581	41.033	40.3806	39.7033	39.0261	37.8569	36.6509	35.4622	35.0003	34.5383	34.3727	36.4593	38.5458	40.6213	42.6546	44.6879	46.8196	49.1782	51.5369	54.9673	60.0369	65.1065	68.3284
4	2	40.5505	41.0129	41.4754	41.9632	42.6976	43.432	44.2992	45.7468	47.1944	48.4665	49.2853	50.1041	51.035	52.1549	53.2749	54.0476	54.421	54.7944	54.8088	54.539	54.2692	52.8625	50.8468	48.831	47.0335	45.3111	43.5887	41.44	39.2084	36.9769	35.5	34.0797	32.6892	32.549	32.4088	32.4568	33.9353	35.4137	37.0079	39.0392	41.0706	43.2938	45.9599	48.6259	51.4501	54.5164	57.5826	60.8619
4	3	50.5117	49.8256	49.1394	48.4904	48.2033	47.9162	47.7232	47.9419	48.1607	48.5429	49.3472	50.1516	51.0299	52.0331	53.0362	53.8832	54.5506	55.2179	55.7564	56.1928	56.6292	55.5039	53.542	51.58	50.401	49.491	48.581	48.0947	47.6907	47.2868	46.8603	46.4322	46.0108	45.8702	45.7296	45.6585	46.1152	46.5719	46.9376	46.9592	46.9809	46.8234	46.2526	45.6817	45.5807	46.1985	46.8162	47.7689
4	4	57.8518	56.5496	55.2474	53.9473	52.6679	51.3886	50.1346	48.9916	47.8487	46.8225	46.0979	45.3732	44.7445	44.2777	43.8109	43.4443	43.1928	42.9414	42.7905	42.719	42.6475	42.3734	41.9908	41.6082	41.3765	41.1968	41.017	40.9696	40.948	40.9263	41.0446	41.1733	41.2862	40.7328	40.1794	39.6025	38.8471	38.0917	37.376	36.8108	36.2455	36.3151	37.8496	39.3841	41.11	43.1286	45.1471	47.378
4	5	54.1415	53.8679	53.5944	53.3193	53.0297	52.7401	52.4305	52.0336	51.6366	51.2702	50.9824	50.6945	50.5217	50.543	50.5642	50.6473	50.8015	50.9556	51.2252	51.5861	51.9471	52.7864	53.882	54.9775	56.5743	58.3433	60.1122	61.7408	63.3422	64.9435	66.4616	67.9734	69.4902	71.2109	72.9317	74.6592	76.4379	78.2167	80.0419	82.0425	84.0432	86.0533	88.0854	90.1176	92.24	94.5007	96.7613	98.9427
[truncated: 78 more columns]

## Sheet: Control3
Session	Step	1	2	3	4	5	6	7	8	9	10	11	12	13	14	15	16	17	18	19	20	21	22	23	24	25	26	27	28	29	30	31	32	33	34	35	36	37	38	39	40	41	42	43	44	45	46	47	48
1	1	68.4209	68.9501	69.4793	69.9497	70.3612	70.7727	71.2548	71.7369	72.2465	72.7835	73.3206	73.6297	73.9389	74.1437	74.2443	74.3449	74.5145	74.6841	74.946	75.3	75.6541	76.0558	76.4574	76.8878	77.3468	77.8059	78.3234	78.841	79.4607	80.1824	80.9042	81.654	82.4038	83.1775	83.9751	84.7726	85.568	86.3634	87.1557	87.9449	88.734	89.5363	90.3387	91.1261	91.8988	92.6714	93.3666	94.0619
1	2	54.568	55.3704	56.1727	56.9724	57.7694	58.5664	59.3681	60.1699	60.9571	61.7298	62.5025	63.2824	64.0624	64.8806	65.7373	66.5939	67.5205	68.4471	69.3615	70.2636	71.1658	72.0208	72.8759	73.7922	74.7697	75.7472	76.752	77.7568	78.7483	79.7265	80.7048	81.5928	82.4809	83.3092	84.0776	84.846	85.5318	86.2176	86.9142	87.6215	88.3289	89.1058	89.8828	90.6534	91.4177	92.182	92.843	93.5041
1	3	61.2537	61.9921	62.7304	63.3344	63.8039	64.2734	64.6464	65.0195	65.4135	65.8284	66.2433	66.7145	67.1857	67.6832	68.207	68.7309	69.3622	69.9936	70.7008	71.4839	72.267	73.123	73.9789	74.9104	75.9173	76.9243	77.9464	78.9684	79.9948	81.0255	82.0562	83.113	84.1698	85.243	86.3326	87.4223	88.3962	89.37	90.3201	91.2464	92.1727	93.1852	94.1978	95.2043	96.2049	97.2055	98.0511	98.8968
1	4	56.1422	57.0265	57.9107	58.8391	59.8118	60.7844	61.8514	62.9183	64.0212	65.1601	66.299	67.4719	68.6448	69.8236	71.0081	72.1927	73.4079	74.6232	75.8611	77.1216	78.3821	79.599	80.816	81.9574	83.0232	84.0889	84.9594	85.8299	86.6826	87.5175	88.3524	89.2174	90.0824	90.9684	91.8755	92.7826	93.7216	94.6607	95.6219	96.6054	97.5889	98.5939	99.5989	100.574	101.52	102.465	103.321	104.177
1	5	51.1604	51.6087	52.057	52.5168	52.988	53.4592	53.8868	54.3144	54.7904	55.3146	55.8388	56.5323	57.2258	57.9864	58.8139	59.6414	60.5547	61.468	62.4071	63.3721	64.3371	65.2609	66.1846	67.137	68.1179	69.0989	70.0918	71.0847	72.0845	73.0914	74.0982	75.1038	76.1094	77.0919	78.0515	79.0111	79.8805	80.7498	81.5891	82.3985	83.2078	84.0766	84.9454	85.8818	86.8858	87.8898	88.8991	89.9085
2	1	50.0252	50.788	51.5508	52.3063	53.0545	53.8027	54.5386	55.2745	56.0034	56.7254	57.4473	58.1803	58.9133	59.6814	60.4848	61.2882	62.0755	62.8629	63.7124	64.624	65.5356	66.6469	67.7581	68.8935	70.053	71.2125	72.3358	73.4591	74.5902	75.729	76.8677	77.9371	79.0064	80.0692	81.1254	82.1816	83.2429	84.3041	85.3947	86.5147	87.6347	88.8382	90.0417	91.2841	92.5655	93.847	95.2084	96.5698
2	2	66.5986	66.8862	67.1738	67.5084	67.8899	68.2715	68.823	69.3744	70.0017	70.7047	71.4077	72.1783	72.949	73.698	74.4254	75.1528	75.859	76.5653	77.3069	78.084	78.8611	79.6695	80.4779	81.287	82.0968	82.9067	83.7126	84.5185	85.3288	86.1435	86.9582	87.7306	88.5031	89.2577	89.9945	90.7313	91.4705	92.2097	92.9652	93.7371	94.509	95.2664	96.0238	96.741	97.4181	98.0951	98.7931	99.491
2	3	56.8018	57.0972	57.3925	57.751	58.1726	58.5942	59.0767	59.5593	60.0626	60.5866	61.1107	61.6789	62.2472	62.8365	63.4469	64.0573	64.5731	65.0888	65.7196	66.4655	67.2113	68.0646	68.918	69.7977	70.7039	71.6101	72.5542	73.4984	74.4685	75.4645	76.4606	77.5254	78.5903	79.6556	80.7214	81.7871	82.8101	83.8331	84.8377	85.8238	86.81	87.7899	88.7698	89.7616	90.7655	91.7693	92.7779	93.7865
2	4	59.8281	60.1786	60.5291	60.9559	61.459	61.9621	62.4801	62.9981	63.5095	64.0142	64.519	65.0241	65.5292	66.0411	66.5599	67.0787	67.8189	68.5591	69.3053	70.0574	70.8095	71.5439	72.2783	73.0231	73.7782	74.5332	75.3319	76.1306	76.9452	77.7757	78.6062	79.4983	80.3903	81.28	82.1674	83.0547	83.9506	84.8465	85.7823	86.758	87.7336	88.7195	89.7053	90.633	91.5025	92.372	93.2523	94.1326
3	1	69.4737	69.1836	68.8934	68.5548	68.1675	67.7803	67.5191	67.2579	67.12	67.1055	67.091	67.3412	67.5914	67.8312	68.0605	68.2898	68.762	69.2341	69.7186	70.2155	70.7123	71.1671	71.6219	72.098	72.5956	73.0932	73.7451	74.397	75.1163	75.9028	76.6894	77.3842	78.079	78.7041	79.2594	79.8146	80.3609	80.9072	81.4482	81.9842	82.5201	83.0334	83.5466	84.0381	84.5079	84.9777	85.422	85.8662
3	2	55.7176	55.9584	56.1993	56.545	56.9954	57.4458	57.9951	58.5445	59.1114	59.6957	60.2801	60.8819	61.4838	62.1728	62.9489	63.7251	64.1678	64.6105	65.0642	65.5291	65.9939	66.6424	67.2908	68.0146	68.8137	69.6128	70.5668	71.5208	72.5232	73.5738	74.6245	75.7326	76.8408	77.9607	79.0922	80.2237	81.3491	82.4746	83.5676	84.6283	85.6889	86.7004	87.7119	88.7128	89.7031	90.6933	91.6792	92.6651
3	3	63.5292	63.2941	63.0591	63.0755	63.3434	63.6113	63.8502	64.0892	64.2807	64.4247	64.5686	65.0172	65.4657	65.8072	66.0417	66.2762	66.6904	67.1046	67.5503	68.0276	68.5049	69.0457	69.5865	70.2176	70.9393	71.6609	72.666	73.6712	74.6623	75.6393	76.6163	77.8505	79.0847	80.4574	81.9686	83.4798	85.0221	86.5643	88.0966	89.6187	91.1408	92.2446	93.3484	94.4298	95.4889	96.5479	97.7657	98.9836
3	4	57.3198	57.1633	57.0067	56.9379	56.9569	56.9759	57.1271	57.2783	57.4748	57.7164	57.958	58.2495	58.541	58.8378	59.1399	59.4419	59.773	60.104	60.4532	60.8205	61.1878	61.5907	61.9935	62.4097	62.8393	63.2689	63.854	64.4392	65.098	65.8303	66.5626	67.3295	68.0963	68.8833	69.6904	70.4976	71.4693	72.4409	73.4109	74.379	75.3471	76.3806	77.4141	78.4826	79.5863	80.69	81.8455	83.0011
3	5	52.5902	52.135	51.6797	51.121	50.4588	49.7966	49.1236	48.4506	47.8357	47.2788	46.7219	46.339	45.956	45.7618	45.7562	45.7507	45.8395	45.9283	46.0496	46.2035	46.3574	46.6202	46.883	47.2587	47.7474	48.236	49.1017	49.9674	50.898	51.8935	52.8889	53.9789	55.0689	56.199	57.3691	58.5392	59.7959	61.0525	62.4046	63.8522	65.2999	66.8627	68.4255	70.0035	71.5966	73.1898	74.8148	76.4399
4	1	86.3329	85.9114	85.4899	84.8706	84.0535	83.2364	82.1593	81.0821	80.0022	78.9197	77.8371	76.9499	76.0626	75.3032	74.6716	74.04	73.582	73.124	72.7345	72.4136	72.0927	72.0706	72.0486	72.2348	72.6293	73.0238	73.6397	74.2556	74.9405	75.6945	76.4485	77.3579	78.2673	79.201	80.1589	81.1168	82.0456	82.9743	83.9656	85.0195	86.0734	87.0533	88.0331	88.937	89.765	90.593	91.3004	92.0078
4	2	73.5321	73.8124	74.0927	74.3355	74.5407	74.7459	74.7908	74.8358	74.7297	74.4724	74.2151	73.595	72.975	72.259	71.4471	70.6352	70.1569	69.6786	69.583	69.8699	70.1568	70.4545	70.7522	71.0095	71.2264	71.4433	71.6067	71.7702	71.9406	72.118	72.2953	72.5432	72.7911	73.0795	73.4084	73.7373	74.0746	74.4118	74.7875	75.2017	75.6159	76.125	76.634	77.1996	77.8218	78.4439	79.3153	80.1867
4	3	75.1378	75.9612	76.7846	77.4898	78.0769	78.664	79.4265	80.1889	80.8638	81.4512	82.0385	82.5231	83.0077	83.5704	84.2114	84.8524	84.8077	84.7631	84.4848	83.9727	83.4605	83.2585	83.0564	82.9359	82.897	82.8581	82.8472	82.8363	82.8433	82.8681	82.8929	83.003	83.1131	83.2146	83.3075	83.4004	83.5797	83.759	84.0913	84.5766	85.0619	85.566	86.0701	86.6265	87.2354	87.8442	88.6091	89.374
4	4	70.0316	70.8624	71.6932	72.4304	73.0738	73.7172	74.3153	74.9134	75.492	76.0513	76.6106	77.1894	77.7682	78.4033	79.0946	79.7858	80.5401	81.2943	82.0523	82.814	83.5756	84.3823	85.1889	85.9493	86.6633	87.3774	87.9802	88.5831	89.2153	89.877	90.5387	91.4153	92.292	93.2004	94.1407	95.081	96.0798	97.0786	98.1022	99.1505	100.199	101.088	101.977	102.894	103.839	104.783	105.81	106.837
4	5	68.9151	69.0627	69.2103	69.2349	69.1363	69.0377	68.699	68.3602	67.8477	67.1615	66.4752	65.4879	64.5007	63.5236	62.5566	61.5897	61.1906	60.7916	60.5387	60.432	60.3253	60.391	60.4566	60.5263	60.5999	60.6735	60.7735	60.8735	61.0327	61.2511	61.4695	61.8371	62.2047	62.5804	62.9641	63.3478	63.9841	64.6203	65.2856	65.9798	66.6739	67.517	68.36	69.2407	70.159	71.0772	72.0163	72.9554
4	6	70.2196	69.8218	69.424	68.922	68.316	67.7099	66.9224	66.1349	65.321	64.4808	63.6405	62.8517	62.0628	61.3317	60.6584	59.9851	59.5244	59.0637	58.7867	58.6933	58.5999	58.7345	58.8691	59.03	59.2172	59.4044	59.6503	59.8962	60.1787	60.498	60.8173	61.2172	61.6171	62.0839	62.6175	63.1512	63.8847	64.6181	65.3719	66.1459	66.92	67.7967	68.6734	69.5878	70.5398	71.4917	72.5039	73.5161
5	1	71.7138	72.5006	73.2874	74.0592	74.8158	75.5725	76.2814	76.9904	77.5898	78.0798	78.5697	78.9458	79.3219	79.568	79.6841	79.8002	80.0488	80.2973	80.6003	80.9578	81.3154	81.6825	82.0496	82.4601	82.914	83.368	84.0029	84.6378	85.3005	85.991	86.6814	87.3755	88.0696	88.6746	89.1907	89.7067	90.1588	90.6108	91.0287	91.4124	91.7962	92.3229	92.8496	93.3937	93.9552	94.5167	95.1174	95.7181
5	2	45.4948	45.5872	45.6795	45.7788	45.8852	45.9916	46.1281	46.2645	46.4334	46.6345	46.8357	47.2179	47.6001	48.0134	48.4576	48.9019	49.525	50.148	50.8346	51.5846	52.3346	53.1081	53.8817	54.7212	55.6265	56.5319	57.4637	58.3955	59.3228	60.2456	61.1684	62.0889	63.0095	63.9735	64.981	65.9884	67.1497	68.311	69.5186	70.7724	72.0262	73.2946	74.5631	75.804	77.0173	78.2307	79.6175	81.0044
5	3	48.4593	47.8986	47.338	46.9155	46.6313	46.3471	46.3111	46.2752	46.3409	46.5082	46.6755	46.966	47.2565	47.6733	48.2164	48.7596	49.419	50.0784	50.7243	51.3566	51.9889	52.4362	52.8835	53.3293	53.7736	54.218	54.7349	55.2517	55.7897	56.3486	56.9076	57.5288	58.15	58.8682	59.6833	60.4983	61.3631	62.2278	63.1451	64.1151	65.0852	66.1253	67.1654	68.2128	69.2674	70.322	71.3552	72.3884
5	4	49.9104	49.5878	49.2652	48.8669	48.3927	47.9186	47.3417	46.7648	46.0571	45.2186	44.3801	43.747	43.1139	42.7126	42.5431	42.3736	42.0443	41.715	41.4849	41.354	41.223	41.2661	41.3092	41.4189	41.5953	41.7717	42.1228	42.4739	42.8281	43.1855	43.5428	43.7808	44.0188	44.3047	44.6385	44.9722	45.4711	45.9699	46.5099	47.091	47.672	48.4415	49.211	50.0388	50.925	51.8112	52.8522	53.8931
5	5	35.1778	35.1424	35.107	35.1901	35.3916	35.5931	35.9813	36.3696	36.7821	37.2189	37.6556	38.1529	38.6502	39.2252	39.878	40.5308	41.2793	42.0279	42.7981	43.59	44.3818	45.1735	45.9651	46.7627	47.5663	48.3699	49.1861	50.0022	50.8083	51.6042	52.4001	53.2899	54.1796	55.084	56.0032	56.9223	57.7799	58.6374	59.5252	60.4433	61.3614	62.3934	63.4253	64.577	65.8483	67.1196	68.5199	69.9203
5	6	56.1416	55.7856	55.4296	55.1407	54.919	54.6972	54.5837	54.4702	54.3794	54.3113	54.2431	54.2732	54.3034	54.3464	54.4023	54.4582	54.4804	54.5026	54.5598	54.6519	54.7441	54.9522	55.1603	55.4379	55.785	56.1321	56.6874	57.2427	57.818	58.4134	59.0088	59.648	60.2872	60.9679	61.69	62.4121	63.1519	63.8917	64.6276	65.3594	66.0913	66.7856	67.4799	68.2064	68.965	69.7236	70.4981	71.2726
6	1	71.5994	71.0261	70.4528	69.5964	68.4571	67.3177	66.2088	65.0998	64.146	63.3474	62.5487	62.1101	61.6714	61.4051	61.3112	61.2172	61.3832	61.5492	61.765	62.0307	62.2963	62.5625	62.8288	63.0719	63.2919	63.5118	63.7066	63.9013	64.1225	64.3701	64.6178	64.7872	64.9567	65.0913	65.1912	65.291	65.3776	65.4641	65.5841	65.7374	65.8907	66.2051	66.5196	67.0684	67.8517	68.6349	69.6839	70.7329
6	2	78.7449	78.82	78.8952	79.0051	79.1497	79.2944	79.7876	80.2807	80.8236	81.4161	82.0087	82.1737	82.3386	82.0605	81.3393	80.6181	79.6259	78.6338	77.4745	76.1482	74.8218	73.5322	72.2425	71.1288	70.1911	69.2534	68.7792	68.3051	68.0754	68.0902	68.1051	68.1654	68.2258	68.3316	68.4828	68.634	68.938	69.2421	69.6369	70.1224	70.6079	71.1784	71.7489	72.4843	73.3846	74.2849	75.2024	76.1199
6	3	58.8116	58.8116	58.8117	58.7764	58.7057	58.635	58.1522	57.6694	57.1048	56.4583	55.8118	55.4791	55.1465	54.9496	54.8886	54.8276	54.9372	55.0468	55.2125	55.4345	55.6564	55.9414	56.2263	56.5112	56.7959	57.0806	57.3013	57.522	57.8719	58.351	58.8302	59.5867	60.3433	61.1289	61.9436	62.7583	63.5568	64.3554	65.1579	65.9644	66.7709	67.7223	68.6736	69.6928	70.7799	71.8669	73.0917	74.3166
6	4	42.4486	42.1238	41.7989	41.5121	41.2634	41.0147	40.8897	40.7648	40.7023	40.7021	40.7019	40.8113	40.9208	41.1155	41.3955	41.6755	42.1182	42.561	43.0547	43.5994	44.1441	44.8005	45.4569	46.1802	46.9703	47.7604	48.7094	49.6585	50.702	51.8398	52.9777	54.2532	55.5288	56.8194	58.125	59.4306	60.72	62.0094	63.2936	64.5725	65.8515	67.2096	68.5678	69.9468	71.3464	72.7461	74.5082	76.2702
7	1	68.534	68.9561	69.3782	69.822	70.2874	70.7527	71.2627	71.7726	72.3154	72.8912	73.4669	74.1157	74.7645	75.4354	76.1283	76.8213	77.5367	78.2521	78.9576	79.6531	80.3486	81.0401	81.7317	82.4203	83.1062	83.792	84.465	85.1381	85.8004	86.4521	87.1039	87.7172	88.3304	88.9546	89.5895	90.2245	90.8928	91.5611	92.1965	92.7991	93.4017	93.9425	94.4834	95.0354	95.5986	96.1618	96.7474	97.333
7	2	73.5356	73.5342	73.5329	73.5993	73.7333	73.8674	74.1103	74.3532	74.6368	74.9609	75.285	75.6944	76.1037	76.5776	77.1161	77.6547	78.2144	78.7741	79.347	79.933	80.5189	81.1616	81.8043	82.474	83.1709	83.8677	84.5796	85.2915	85.9809	86.6478	87.3146	87.9249	88.5353	89.1389	89.7358	90.3327	90.9228	91.5128	92.0995	92.6828	93.266	93.843	94.42	94.996	95.571	96.1461	96.7357	97.3253
7	3	61.3502	61.7623	62.1745	62.5882	63.0035	63.4188	63.8755	64.3321	64.8218	65.3445	65.8672	66.4691	67.071	67.7154	68.4025	69.0896	69.9222	70.7548	71.632	72.554	73.4759	74.397	75.3181	76.227	77.1237	78.0204	78.8952	79.77	80.6373	81.4973	82.3573	83.1638	83.9704	84.7721	85.5689	86.3658	87.1574	87.949	88.7381	89.5247	90.3113	91.088	91.8648	92.6297	93.383	94.1362	94.8302	95.5242
7	4	58.761	58.9982	59.2354	59.4647	59.6861	59.9074	60.1031	60.2988	60.511	60.7396	60.9683	61.2985	61.6287	62.0255	62.4891	62.9526	63.5565	64.1604	64.9022	65.7817	66.6612	67.6268	68.5924	69.5665	70.5492	71.5319	72.5188	73.5057	74.5035	75.5122	76.5209	77.561	78.6011	79.6352	80.6633	81.6913	82.6663	83.6413	84.6011	85.5458	86.4904	87.3721	88.2539	89.0997	89.9097	90.7197	91.7481	92.7764
7	5	69.5647	69.8816	70.1986	70.5041	70.798	71.0919	71.3744	71.6569	71.9478	72.2471	72.5464	72.9109	73.2755	73.7027	74.1925	74.6823	75.2572	75.8321	76.4076	76.9836	77.5596	78.1882	78.8169	79.5121	80.2738	81.0356	81.9031	82.7705	83.6228	84.4598	85.2968	86.1242	86.9517	87.796	88.6571	89.5182	90.3396	91.1609	92.0046	92.8706	93.7367	94.6534	95.5701	96.4792	97.3806	98.2821	99.1613	100.04
8	1	75.7689	75.8289	75.8889	75.7558	75.4297	75.1036	74.4375	73.7713	73.0194	72.1818	71.3442	70.6265	69.9089	69.4151	69.1452	68.8753	68.8687	68.862	68.9189	69.0395	69.1601	69.2563	69.3526	69.353	69.2578	69.1625	69.2088	69.255	69.3755	69.5702	69.7648	70.0651	70.3654	70.7218	71.1343	71.5467	72.1274	72.708	73.4348	74.3078	75.1807	76.1413	77.102	78.0219	78.901	79.7802	80.5173	81.2545
8	2	76.0867	77.0373	77.9879	78.8522	79.6302	80.4082	81.0215	81.6347	82.145	82.5524	82.9597	83.0707	83.1818	83.1171	82.8768	82.6364	82.0968	81.5571	80.8876	80.0882	79.2888	78.3895	77.4901	76.6808	75.9616	75.2424	75.0707	74.899	74.7625	74.6611	74.5597	74.4265	74.2932	74.1438	73.978	73.8123	73.7151	73.6179	73.598	73.6557	73.7133	74.0084	74.3035	74.6623	75.0849	75.5075	75.9813	76.455
8	3	63.2352	63.104	62.9728	62.7242	62.3583	61.9924	61.5994	61.2065	60.7985	60.3753	59.9522	59.2847	58.6173	57.8185	56.8883	55.9581	55.1131	54.2682	53.5929	53.0873	52.5818	52.3292	52.0766	51.7371	51.3108	50.8844	50.915	50.9457	51.0239	51.1498	51.2757	51.4963	51.717	51.9754	52.2715	52.5676	52.901	53.2344	53.6425	54.1253	54.6082	55.2293	55.8504	56.5353	57.284	58.0326	58.9048	59.7769
8	4	61.4029	61.5958	61.7887	61.9503	62.0805	62.2106	61.9515	61.6924	61.3371	60.8855	60.4338	60.5097	60.5855	60.7073	60.8752	61.0431	61.1258	61.2085	61.3269	61.481	61.6351	61.9846	62.3341	62.8268	63.4629	64.099	64.7071	65.3152	65.9909	66.7341	67.4774	68.2461	69.0149	69.7944	70.5846	71.3749	72.2881	73.2014	74.2356	75.3907	76.5459	77.5755	78.6052	79.6537	80.721	81.7883	83.0073	84.2262
8	5	62.698	62.5378	62.3775	62.2049	62.0197	61.8346	61.5459	61.2573	60.9906	60.746	60.5013	60.6744	60.8475	60.8153	60.5776	60.34	60.7199	61.0999	61.6022	62.227	62.8517	63.3731	63.8944	64.2024	64.2969	64.3914	64.186	63.9806	63.8642	63.8368	63.8093	64.0159	64.2225	64.5459	64.986	65.4261	66.0428	66.6595	67.3485	68.1098	68.8711	69.759	70.6469	71.5917	72.5935	73.5952	74.7274	75.8595
9	1	44.4262	44.0573	43.6884	43.3803	43.1329	42.8856	42.8911	42.8967	43	43.2012	43.4023	43.7307	44.0591	44.4215	44.8178	45.2142	45.6152	46.0163	46.4095	46.795	47.1805	47.7856	48.3907	49.042	49.7394	50.4369	51.1459	51.855	52.5426	53.2089	53.8751	54.6176	55.3602	56.181	57.08	57.979	59.0013	60.0236	61.0945	62.2142	63.3338	64.5269	65.72	66.8898	68.0364	69.183	70.1735	71.164
9	2	65.1056	64.7933	64.4809	64.2618	64.1357	64.0096	63.9697	63.9297	63.9083	63.9055	63.9027	63.8998	63.897	63.8917	63.8841	63.8764	63.9428	64.0091	64.1988	64.5119	64.825	65.0444	65.2639	65.4402	65.5733	65.7065	65.7969	65.8873	66.0356	66.242	66.4483	66.8396	67.2308	67.6998	68.2464	68.793	69.4234	70.0539	70.7001	71.3622	72.0244	72.6761	73.3278	74.0468	74.8332	75.6196	76.3968	77.1741
9	3	40.1904	40.3169	40.4434	40.6956	41.0736	41.4516	41.9179	42.3841	42.8258	43.2429	43.6601	44.0012	44.3424	44.6698	44.9834	45.297	45.6339	45.9707	46.3239	46.6934	47.0629	47.4929	47.923	48.412	48.9599	49.5078	50.1662	50.8246	51.5621	52.3785	53.1949	54.1367	55.0786	56.058	57.0751	58.0922	59.1708	60.2495	61.3687	62.5285	63.6883	64.9629	66.2375	67.5731	68.9699	70.3666	71.8488	73.331
9	4	60.2477	60.3127	60.3777	60.3623	60.2663	60.1703	59.8708	59.5712	59.2553	58.9232	58.5911	58.3057	58.0203	57.7609	57.5275	57.2941	57.1622	57.0303	57.0116	57.1062	57.2007	57.4222	57.6436	57.9362	58.2998	58.6634	58.8994	59.1354	59.3649	59.588	59.811	60.1623	60.5136	60.9371	61.4328	61.9285	62.5038	63.079	63.6945	64.3504	65.0062	65.7058	66.4053	67.1389	67.9065	68.6741	69.5709	70.4677
10	1	85.9667	86.4786	86.9905	87.4446	87.841	88.2374	88.4505	88.6636	88.8041	88.8721	88.9401	88.9665	88.993	89.0421	89.1138	89.1856	89.2678	89.3499	89.4091	89.4452	89.4813	89.57	89.6586	89.7347	89.7982	89.8618	89.5068	89.1517	88.5796	87.7905	87.0014	86.0801	85.1587	84.2636	83.3947	82.5258	82.1682	81.8105	81.6588	81.7129	81.7671	81.9706	82.1741	82.3938	82.6299	82.866	83.1266	83.3871
10	2	72.7849	72.8326	72.8803	72.925	72.9666	73.0081	72.5115	72.0148	71.5495	71.1155	70.6814	70.7194	70.7574	70.943	71.276	71.609	71.8824	72.1557	72.334	72.4173	72.5006	72.5161	72.5316	72.5566	72.5911	72.6256	72.7945	72.9634	73.2317	73.5994	73.9671	74.5717	75.1763	75.9367	76.8528	77.769	78.9161	80.0632	81.1159	82.0742	83.0325	84.0194	85.0063	86.0167	87.0506	88.0845	89.1512	90.2179
10	3	75.8076	76.3424	76.8772	77.3203	77.6718	78.0232	78.351	78.6787	79.0236	79.3858	79.748	80.0788	80.4097	80.6781	80.8839	81.0897	81.2128	81.3359	81.1482	80.6497	80.1513	79.1043	78.0573	77.1913	76.5064	75.8214	75.6799	75.5384	75.5867	75.8248	76.063	76.4186	76.7743	77.1041	77.4082	77.7122	77.9299	78.1476	78.3051	78.4023	78.4996	78.5247	78.5499	78.6333	78.7752	78.917	79.2693	79.6215
10	4	78.6397	78.8748	79.1099	79.2486	79.2911	79.3335	79.1651	78.9968	78.8117	78.6098	78.4078	78.1539	77.9001	77.5673	77.1557	76.744	76.463	76.182	76.024	75.9889	75.9538	76.0264	76.099	76.1853	76.2853	76.3853	75.9058	75.4263	74.9231	74.3963	73.8694	74.0693	74.2692	74.3737	74.3828	74.3919	74.357	74.322	74.0747	73.6152	73.1556	72.889	72.6224	72.5147	72.5659	72.6171	72.981	73.3449
11	1	71.1295	71.6338	72.1381	72.6476	73.1622	73.6768	74.1242	74.5715	74.9831	75.3587	75.7344	76.0731	76.4118	76.7343	77.0406	77.3469	77.6667	77.9865	78.3023	78.6141	78.9258	79.1553	79.3849	79.5881	79.7651	79.942	80.2401	80.5381	80.9317	81.4208	81.9099	82.5259	83.1418	83.7886	84.4662	85.1438	85.8235	86.5032	87.1677	87.817	88.4663	89.1397	89.813	90.4704	91.1118	91.7532	92.3147	92.8762
11	2	58.9218	58.7972	58.6727	58.5397	58.3983	58.257	58.0785	57.9001	57.8006	57.78	57.7595	58.0921	58.4248	58.7575	59.0904	59.4232	59.8242	60.2252	60.6632	61.1381	61.6131	62.1094	62.6056	63.0615	63.477	63.8925	64.0961	64.2997	64.5799	64.9368	65.2937	65.5346	65.7754	66.1177	66.5616	67.0055	67.591	68.1766	68.7388	69.2777	69.8166	70.3069	70.7973	71.3797	72.054	72.7283	73.4754	74.2224
11	3	56.3769	56.9204	57.464	58.0622	58.7149	59.3677	60.0464	60.7252	61.3779	62.0045	62.6312	63.1403	63.6493	64.0714	64.4064	64.7415	65.0296	65.3176	65.6728	66.0952	66.5176	67.0266	67.5356	68.0729	68.6385	69.2041	69.8685	70.5328	71.2375	71.9825	72.7275	73.5431	74.3587	75.2016	76.0718	76.942	77.8445	78.7471	79.6555	80.5697	81.484	82.4074	83.3309	84.2615	85.1991	86.1368	87.0245	87.9123
11	4	50.6563	51.277	51.8978	52.529	53.1709	53.8127	54.3871	54.9615	55.5111	56.0359	56.5606	57.1039	57.6473	58.2038	58.7736	59.3434	59.964	60.5846	61.2462	61.9488	62.6513	63.3839	64.1164	64.8636	65.6255	66.3873	67.264	68.1406	69.0888	70.1086	71.1285	72.1182	73.1079	74.0648	74.9887	75.9127	76.7711	77.6295	78.4644	79.2757	80.087	80.8668	81.6467	82.4206	83.1887	83.9567	84.7368	85.5169
11	5	52.7965	53.0296	53.2628	53.3245	53.2149	53.1053	53.1756	53.2459	53.4737	53.859	54.2444	54.8264	55.4085	56.0124	56.638	57.2635	57.8444	58.4253	59.0323	59.6655	60.2987	61.0131	61.7276	62.4724	63.2476	64.0228	64.7898	65.5568	66.3208	67.0818	67.8429	68.6651	69.4873	70.3149	71.1479	71.9808	72.8564	73.732	74.6491	75.6079	76.5667	77.5515	78.5362	79.4913	80.4169	81.3426	82.2262	83.1099
12	1	68.6217	69.4217	70.2216	70.7294	70.9449	71.1605	71.0473	70.9341	70.7447	70.4792	70.2136	69.8646	69.5156	69.121	68.6808	68.2406	68.3654	68.4902	68.7093	69.0227	69.3361	69.7387	70.1412	70.5513	70.9691	71.3868	71.7351	72.0834	72.3697	72.594	72.8183	73.1577	73.497	73.7927	74.0446	74.2964	74.6021	74.9077	75.3601	75.9595	76.5588	77.462	78.3653	79.3234	80.3366	81.3498	82.305	83.2602
12	2	62.245	62.386	62.527	62.5727	62.523	62.4734	62.2801	62.0869	61.9224	61.7866	61.6509	61.7495	61.8482	62.074	62.4269	62.7798	63.3113	63.8428	64.404	64.9949	65.5858	66.2037	66.8216	67.4663	68.1377	68.8091	69.5848	70.3604	71.2043	72.1164	73.0286	73.936	74.8434	75.7877	76.7687	77.7498	78.8217	79.8937	80.9657	82.0377	83.1097	84.1435	85.1773	86.201	87.2147	88.2284	89.2182	90.2081
12	3	75.1963	75.7516	76.3069	76.8429	77.3598	77.8767	78.5752	79.2737	79.9882	80.7185	81.4489	81.9967	82.5445	82.9491	83.2105	83.4719	82.3958	81.3196	80.2855	79.2936	78.3017	77.5421	76.7826	76.1679	75.6982	75.2285	75.0344	74.8404	74.7453	74.7491	74.753	74.8099	74.8669	74.8274	74.6913	74.5553	74.6338	74.7122	74.8416	75.022	75.2023	75.4315	75.6606	75.9241	76.2219	76.5197	76.7293	76.9388
12	4	53.1044	53.1991	53.2937	53.2418	53.0434	52.8449	52.5998	52.3547	52.1577	52.0087	51.8598	51.8082	51.7566	51.6909	51.611	51.5311	51.6831	51.8351	52.1047	52.4917	52.8787	53.3557	53.8327	54.3289	54.8443	55.3597	55.9161	56.4726	57.0672	57.6999	58.3326	59.0546	59.7765	60.5039	61.2368	61.9697	62.7621	63.5546	64.3589	65.1752	65.9916	66.8284	67.6652	68.5411	69.4563	70.3714	71.516	72.6606
12	5	64.479	64.1548	63.8306	63.5318	63.2584	62.9851	62.7274	62.4697	62.2393	62.0361	61.8329	61.7067	61.5806	61.4597	61.3443	61.2288	60.8552	60.4815	60.1503	59.8617	59.573	59.4993	59.4256	59.4257	59.4995	59.5734	59.6981	59.8227	59.9465	60.0695	60.1924	60.3261	60.4597	60.6913	61.0209	61.3504	61.5923	61.8341	62.0895	62.3584	62.6274	63.1047	63.5821	64.2192	65.0159	65.8127	66.7926	67.7725
13	1	70.7902	70.716	70.6417	70.3496	69.8398	69.3299	68.7279	68.1259	67.8103	67.7811	67.7519	67.9738	68.1958	68.2399	68.1061	67.9723	67.6374	67.3024	67.3487	67.776	68.2033	68.3909	68.5784	68.7681	68.9599	69.1517	69.291	69.4304	69.6781	70.034	70.39	70.9063	71.4225	71.8925	72.3162	72.7398	73.0799	73.42	73.9833	74.7697	75.5562	76.4924	77.4286	78.3888	79.3731	80.3574	81.7019	83.0464
13	2	70.0843	70.5807	71.077	71.4994	71.8477	72.1961	72.2839	72.3718	72.3019	72.0744	71.8469	71.4656	71.0843	70.7647	70.5069	70.2491	70.3124	70.3757	70.5861	70.9435	71.301	71.7503	72.1996	72.7316	73.3465	73.9613	74.2893	74.6173	74.8822	75.084	75.2858	75.5867	75.8875	76.2526	76.6821	77.1115	77.5617	78.0119	78.4748	78.9503	79.4257	79.9617	80.4976	81.0347	81.5728	82.111	82.795	83.4791
13	3	58.4062	57.6705	56.9347	56.0383	54.9812	53.9242	52.9881	52.052	51.2601	50.6124	49.9647	49.4458	48.9269	48.4456	48.0018	47.558	47.3827	47.2074	47.1274	47.1426	47.1579	47.3977	47.6376	47.9006	48.1868	48.4729	48.5874	48.7019	48.8272	48.9635	49.0997	49.3491	49.5984	49.8853	50.2097	50.5341	50.9298	51.3255	51.842	52.4793	53.1166	53.9894	54.8622	55.8115	56.8373	57.863	59.0895	60.3159
13	4	75.0689	75.132	75.195	75.176	75.0747	74.9734	74.7755	74.5776	74.3538	74.1041	73.8544	73.3842	72.914	72.2595	71.4205	70.5815	69.5446	68.5077	67.6391	66.9387	66.2384	65.94	65.6417	65.3529	65.0738	64.7946	64.5244	64.2541	63.9828	63.7103	63.4379	63.2203	63.0028	62.8699	62.8217	62.7736	62.9745	63.1754	63.4724	63.8655	64.2586	64.7709	65.2831	65.8654	66.5178	67.1701	68.0304	68.8906
13	5	58.7027	58.3695	58.0362	57.722	57.4268	57.1316	56.8957	56.6599	56.4671	56.3176	56.1681	56.1219	56.0758	56.0798	56.1338	56.1879	56.3347	56.4815	56.6877	56.9534	57.2191	57.5666	57.9141	58.2719	58.6401	59.0083	59.4341	59.8599	60.3299	60.844	61.3582	61.971	62.5838	63.2494	63.9679	64.6864	65.4991	66.3119	67.1445	67.9969	68.8493	69.7519	70.6546	71.6649	72.7829	73.9009	75.1222	76.3435
14	1	60.349	60.2605	60.1721	60.098	60.038	59.9781	59.9308	59.8835	59.831	59.7734	59.7159	59.6182	59.5205	59.6459	59.9944	60.343	60.7808	61.2187	61.6825	62.1724	62.6623	63.1601	63.658	64.1345	64.5896	65.0448	65.7157	66.3866	67.1126	67.8938	68.6751	69.5547	70.4344	71.3481	72.2959	73.2437	74.211	75.1783	76.2755	77.5026	78.7298	80.1489	81.5681	83.0895	84.7131	86.3368	88.0471	89.7574
14	2	70.5115	70.7717	71.0318	71.2934	71.5565	71.8195	72.3	72.7806	73.2493	73.7061	74.163	73.8992	73.6355	73.3932	73.1725	72.9518	72.9872	73.0226	73.1022	73.2258	73.3494	73.5004	73.6513	73.839	74.0634	74.2878	74.8541	75.4204	75.9171	76.3442	76.7714	77.0221	77.2729	77.4865	77.6629	77.8393	78.1826	78.526	79.0007	79.6067	80.2127	80.9583	81.7039	82.5379	83.4602	84.3825	85.4795	86.5765
14	3	78.1489	78.1696	78.1903	78.3208	78.561	78.8011	79.0968	79.3925	79.6352	79.8251	80.0149	79.9402	79.8654	79.4995	78.8424	78.1853	77.1071	76.0288	75.0299	74.1103	73.1906	72.6286	72.0666	71.5925	71.2063	70.82	70.4953	70.1706	70.0679	70.1873	70.3067	70.7978	71.2889	71.8746	72.555	73.2354	73.8128	74.3902	75.0424	75.7695	76.4966	77.5438	78.591	79.7932	81.1504	82.5077	84.0394	85.5711
14	4	66.7231	67.1711	67.6192	68.1164	68.6629	69.2094	69.8449	70.4805	71.1214	71.7678	72.4142	72.9246	73.435	73.848	74.1636	74.4792	74.6197	74.7601	74.7269	74.5202	74.3135	73.6171	72.9207	71.9229	70.6236	69.3244	69.0783	68.8322	68.7008	68.6842	68.6675	68.9203	69.173	69.5088	69.9275	70.3463	70.6843	71.0223	71.3965	71.8067	72.217	73.1499	74.0828	75.0419	76.0271	77.0123	77.8777	78.7431
15	1	78.6862	79.2026	79.719	80.2544	80.8089	81.3633	81.982	82.6008	83.2564	83.949	84.6417	85.4011	86.1606	86.9116	87.6542	88.3968	89.2141	90.0314	90.8975	91.8125	92.7275	93.7505	94.7734	95.849	96.9772	98.1055	99.3193	100.533	101.753	102.98	104.207	105.402	106.597	107.754	108.873	109.991	110.989	111.987	112.922	113.794	114.665	115.463	116.261	117.03	117.77	118.51	119.2	119.89
15	2	60.4756	61.0216	61.5676	62.1017	62.6238	63.1459	63.6604	64.1749	64.6837	65.1867	65.6898	66.1573	66.6249	67.1065	67.602	68.0975	68.6417	69.1858	69.7551	70.3494	70.9437	71.5964	72.2492	72.9386	73.6646	74.3906	75.2005	76.0104	76.8282	77.6537	78.4792	79.3145	80.1498	80.9696	81.7738	82.578	83.2755	83.973	84.6742	85.3791	86.0841	86.8199	87.5558	88.2785	88.988	89.6976	90.3788	91.06
15	3	59.3944	59.9804	60.5663	61.0645	61.4751	61.8857	62.2503	62.6148	62.9861	63.3639	63.7418	64.122	64.5022	64.9165	65.365	65.8134	66.2818	66.7503	67.2436	67.7617	68.2798	68.871	69.4623	70.0989	70.7808	71.4627	72.1771	72.8916	73.6211	74.3657	75.1102	75.8942	76.6782	77.4747	78.2837	79.0926	79.8884	80.6843	81.4672	82.2374	83.0075	83.846	84.6846	85.5533	86.4521	87.3509	88.2957	89.2405
15	4	63.0506	63.1011	63.1516	63.2786	63.482	63.6854	64.0108	64.3362	64.7174	65.1544	65.5915	66.1504	66.7092	67.2822	67.8692	68.4562	68.9932	69.5301	70.0891	70.67	71.2509	71.8992	72.5475	73.2058	73.8743	74.5427	75.259	75.9753	76.6937	77.4142	78.1347	78.9036	79.6725	80.4647	81.2801	82.0954	82.9092	83.7231	84.5125	85.2777	86.0428	86.8025	87.5623	88.2914	88.9899	89.6884	90.313	90.9376
15	5	43.8185	43.7062	43.594	43.5063	43.4433	43.3802	43.4594	43.5386	43.7168	43.994	44.2712	44.7646	45.2581	45.7922	46.3669	46.9416	47.6532	48.3648	49.088	49.8227	50.5574	51.3174	52.0773	52.9088	53.8119	54.715	55.686	56.6571	57.624	58.5868	59.5496	60.5642	61.5787	62.6146	63.6719	64.7292	65.7513	66.7733	67.7788	68.7676	69.7563	70.7458	71.7353	72.7217	73.7052	74.6886	75.6603	76.6319
15	6	65.2142	64.5655	63.9168	63.2794	62.6535	62.0276	61.4657	60.9038	60.3853	59.9101	59.4349	59.0504	58.6659	58.5125	58.5902	58.6679	58.7613	58.8546	58.988	59.1614	59.3347	59.6037	59.8728	60.1732	60.5052	60.8371	61.2046	61.572	61.9653	62.3844	62.8035	63.3547	63.9058	64.5086	65.1629	65.8172	66.4365	67.0559	67.707	68.3899	69.0728	69.7851	70.4973	71.1843	71.846	72.5077	73.0917	73.6757
16	1	51.7812	51.6747	51.5682	51.4672	51.3719	51.2766	51.3936	51.5107	51.8242	52.3343	52.8444	54.0354	55.2265	56.3962	57.5444	58.6926	59.7625	60.8323	61.8906	62.9374	63.9842	65.0949	66.2057	67.378	68.6117	69.8455	70.9437	72.0418	73.0298	73.9076	74.7855	75.3777	75.9698	76.3717	76.5832	76.7947	77.2786	77.7624	78.2338	78.6927	79.1516	79.7096	80.2675	80.968	81.8112	82.6544	83.8149	84.9754
16	2	51.739	51.6258	51.5127	51.2533	50.8479	50.4424	49.8933	49.3443	48.825	48.3355	47.846	47.8884	47.9307	48.195	48.6811	49.1673	49.7018	50.2363	50.7644	51.2862	51.808	52.3304	52.8529	53.4271	54.0531	54.6792	55.338	55.9969	56.7199	57.5071	58.2943	59.2379	60.1814	61.17	62.2037	63.2373	64.3977	65.5581	66.7827	68.0715	69.3602	70.7847	72.2092	73.6981	75.2515	76.805	78.3555	79.906
17	1	72.6252	72.6813	72.7375	72.7903	72.8398	72.8892	72.8928	72.8963	72.8628	72.7923	72.7218	72.6426	72.5635	72.7293	73.1401	73.5509	74.0864	74.6218	75.1632	75.7106	76.258	76.7649	77.2717	77.7678	78.253	78.7382	79.3044	79.8706	80.5348	81.2972	82.0595	82.8633	83.6671	84.4661	85.2604	86.0546	86.8077	87.5607	88.2919	89.0014	89.7108	90.4429	91.1749	91.8653	92.5139	93.1625	93.7147	94.2668
17	2	69.1658	69.7732	70.3805	70.8867	71.2918	71.6968	72.2132	72.7297	73.302	73.9303	74.5586	75.1588	75.759	76.396	77.0699	77.7438	78.457	79.1703	79.7907	80.3185	80.8463	81.1682	81.4901	81.7503	81.9487	82.1472	82.3922	82.6372	83.0072	83.5021	83.9971	84.5763	85.1555	85.7347	86.314	86.8933	87.4823	88.0713	88.6862	89.327	89.9677	90.6665	91.3653	92.0643	92.7634	93.4626	94.2362	95.0099
17	3	59.128	59.1984	59.2688	59.2832	59.2416	59.2	59.0648	58.9297	58.8136	58.7168	58.6199	58.7218	58.8236	59.0373	59.3627	59.6881	60.1373	60.5864	61.1187	61.734	62.3493	63.0211	63.6928	64.3546	65.0064	65.6583	66.3047	66.9512	67.6733	68.4711	69.2688	70.1209	70.973	71.8491	72.7494	73.6496	74.6259	75.6021	76.6243	77.6923	78.7603	79.8462	80.9321	82.0032	83.0594	84.1157	85.1512	86.1867
17	4	61.4838	61.7967	62.1096	62.4279	62.7515	63.0751	63.4526	63.8301	64.2418	64.6877	65.1337	65.6494	66.1652	66.7335	67.3544	67.9753	68.5985	69.2217	69.8627	70.5217	71.1806	71.858	72.5353	73.224	73.924	74.6241	75.39	76.1559	76.9693	77.8302	78.6911	79.5478	80.4044	81.2664	82.1339	83.0014	83.925	84.8486	85.8199	86.8387	87.8575	88.9492	90.0408	91.12	92.1868	93.2536	94.3449	95.4362
17	5	76.9383	76.8477	76.7571	76.6256	76.4532	76.2808	75.9624	75.6439	75.1837	74.5818	73.9799	73.0915	72.2032	71.5828	71.2304	70.8781	70.8965	70.915	70.99	71.1216	71.2533	71.3445	71.4357	71.4934	71.5175	71.5417	71.6278	71.7138	71.8545	72.0498	72.245	72.4728	72.7007	72.9599	73.2505	73.5411	73.8736	74.206	74.5446	74.8894	75.2342	75.6224	76.0105	76.4986	77.0866	77.6747	78.302	78.9292
17	6	64.7543	64.3784	64.0026	63.8689	63.9775	64.086	64.4174	64.7488	65.1211	65.5341	65.9471	66.3959	66.8447	67.3266	67.8416	68.3565	68.9631	69.5697	70.1893	70.8219	71.4545	72.0768	72.6991	73.3079	73.9035	74.499	75.0771	75.6552	76.264	76.9033	77.5426	78.2422	78.9417	79.6547	80.381	81.1074	81.8531	82.5987	83.3566	84.1266	84.8967	85.7016	86.5065	87.3175	88.1345	88.9516	89.8347	90.7179
18	1	66.0915	65.9283	65.7651	65.7586	65.9087	66.0589	66.2125	66.3661	66.4547	66.4785	66.5023	66.3154	66.1286	65.9079	65.6533	65.3987	65.7513	66.1038	66.0228	65.5083	64.9937	65.3057	65.6178	66.0356	66.5593	67.083	67.4145	67.7461	68.0339	68.278	68.5221	68.9331	69.344	69.7127	70.0392	70.3657	70.2664	70.1672	70.2759	70.5924	70.9089	71.2608	71.6128	72.0608	72.6048	73.1489	73.9018	74.6546
18	2	48.1484	47.658	47.1677	46.8551	46.7203	46.5855	46.7125	46.8395	47.1015	47.4986	47.8957	48.5704	49.2452	50.0335	50.9353	51.8372	52.8464	53.8555	54.8832	55.9294	56.9756	58.0252	59.0748	60.0592	60.9785	61.8978	62.6288	63.3598	64.0231	64.6188	65.2145	65.7095	66.2046	66.5852	66.8513	67.1175	67.7478	68.378	69.0753	69.8396	70.604	71.5444	72.4848	73.4856	74.5468	75.608	76.7578	77.9076
18	3	60.2632	59.9843	59.7054	59.5647	59.5622	59.5597	59.7218	59.8839	60.0827	60.3183	60.5538	60.8126	61.0714	61.3335	61.599	61.8644	62.1256	62.3868	62.6789	63.0018	63.3247	63.7652	64.2058	64.6659	65.1456	65.6253	66.125	66.6246	67.2051	67.8664	68.5278	69.4398	70.3518	71.2572	72.1561	73.055	74.1314	75.2077	76.2486	77.254	78.2594	79.2816	80.3037	81.3652	82.4659	83.5667	84.7499	85.9331
18	4	47.9223	47.4402	46.9581	46.6545	46.5294	46.4043	46.5551	46.7059	46.923	47.2063	47.4897	47.8082	48.1267	48.4422	48.7547	49.0672	49.3231	49.579	49.8407	50.1081	50.3755	50.8282	51.281	51.8161	52.4334	53.0508	53.7977	54.5446	55.3507	56.216	57.0813	58.0614	59.0415	60.064	61.129	62.194	63.4676	64.7413	66.0621	67.43	68.7979	70.1224	71.4468	72.7508	74.0344	75.3181	76.6273	77.9365
19	1	85.8853	86.1321	86.3789	86.7339	87.1971	87.6603	88.1208	88.5813	88.8618	88.9621	89.0625	87.8062	86.5498	85.305	84.0716	82.8383	81.6639	80.4895	79.4184	78.4505	77.4826	76.9021	76.3216	75.9285	75.7229	75.5172	75.5947	75.6721	75.7982	75.9728	76.1474	76.2777	76.408	76.4381	76.3679	76.2977	76.194	76.0904	76.0698	76.1322	76.1947	76.3734	76.552	76.7494	76.9654	77.1814	77.7195	78.2577
19	2	75.3988	75.9285	76.4581	76.9641	77.4464	77.9287	77.9501	77.9714	77.6741	77.0579	76.4418	75.4679	74.494	73.4406	72.3075	71.1744	69.9187	68.663	67.4856	66.3866	65.2875	64.711	64.1345	63.8392	63.8251	63.811	63.6822	63.5534	63.3512	63.0755	62.7999	62.4314	62.0629	61.7683	61.5476	61.3268	61.4639	61.6009	61.8654	62.2574	62.6494	63.2277	63.806	64.4334	65.1099	65.7863	66.3365	66.8867
19	3	55.7014	55.6204	55.5395	55.4165	55.2514	55.0863	54.8788	54.6714	54.4649	54.2592	54.0536	53.9239	53.7943	53.6017	53.3464	53.091	52.8099	52.5288	52.2397	51.9428	51.6459	51.3228	50.9998	50.6379	50.2372	49.8365	50.1821	50.5277	50.9903	51.57	52.1497	52.6932	53.2367	53.7594	54.2615	54.7635	55.3713	55.979	56.6819	57.4798	58.2778	59.2054	60.133	61.0816	62.0511	63.0207	64.0909	65.1612
19	4	58.7028	58.7895	58.8761	58.9022	58.8676	58.8331	58.7325	58.632	58.5275	58.4191	58.3107	58.2901	58.2695	57.9448	57.3161	56.6874	56.3314	55.9753	55.8274	55.8875	55.9476	56.3869	56.8262	57.4488	58.2547	59.0606	59.6279	60.1951	60.7435	61.2729	61.8023	62.4087	63.0152	63.6792	64.4009	65.1225	66.0011	66.8796	67.8614	68.9465	70.0315	71.2502	72.4689	73.7031	74.9527	76.2024	77.4382	78.6741
20	1	104.006	103.567	103.129	102.587	101.944	101.3	100.452	99.6031	98.6618	97.6279	96.594	95.4274	94.2607	93.1567	92.1154	91.0741	89.8675	88.6608	87.3378	85.8984	84.4591	82.7841	81.1091	79.4338	77.758	76.0822	74.5466	73.011	71.5241	70.0859	68.6476	67.3567	66.0657	64.9805	64.1011	63.2216	62.5891	61.9566	61.4704	61.1306	60.7907	60.8042	60.8178	61.0365	61.4603	61.8842	62.9396	63.9949
20	2	83.8927	85.1146	86.3365	87.5207	88.6671	89.8135	90.8442	91.875	92.8277	93.7024	94.577	95.206	95.8349	96.2898	96.5705	96.8513	96.6913	96.5312	96.1604	95.5789	94.9973	94.0704	93.1434	92.087	90.901	89.7151	88.2547	86.7942	85.2141	83.5143	81.8144	79.9455	78.0766	76.2071	74.3372	72.4672	71.0817	69.6962	68.5536	67.6538	66.7541	66.3046	65.8552	65.6029	65.5479	65.493	66.0307	66.5684
20	3	77.9669	78.7978	79.6288	80.3033	80.8214	81.3395	81.4984	81.6572	81.7073	81.6486	81.5899	82.0167	82.4434	82.4693	82.0942	81.7191	81.2053	80.6915	80.0768	79.3613	78.6458	77.4916	76.3374	74.8543	73.0423	71.2303	69.1414	67.0525	64.9513	62.8378	60.7243	58.9202	57.116	55.8299	55.0617	54.2936	53.3692	52.4449	51.8416	51.5595	51.2774	51.6183	51.9591	52.5409	53.3637	54.1865	56.1389	58.0913
20	4	61.4765	62.8254	64.1743	65.4847	66.7565	68.0283	69.2424	70.4564	71.6178	72.7265	73.8351	74.5588	75.2825	75.8445	76.2449	76.6452	76.5966	76.5479	76.2053	75.5687	74.9322	73.6167	72.3013	71.283	70.5619	69.8408	69.6232	69.4056	69.2265	69.0858	68.945	68.812	68.6789	68.8216	69.2401	69.6585	70.1977	70.7369	71.1447	71.421	71.6974	72.0456	72.3938	73.0079	73.8879	74.7678	76.4327	78.0976
20	5	61.4474	62.7733	64.0992	65.4944	66.9591	68.4238	70.0369	71.6499	73.2661	74.8853	76.5045	77.4898	78.4751	79.5084	80.5897	81.6711	82.6024	83.5338	84.3512	85.0547	85.7582	86.1831	86.608	86.5984	86.1543	85.7102	84.9254	84.1407	83.3964	82.6926	81.9889	81.5821	81.1754	80.918	80.81	80.702	80.5103	80.3186	80.0322	79.6511	79.27	78.7258	78.1816	77.6001	76.9813	76.3625	76.2393	76.1161
21	1	87.4742	87.6085	87.7429	87.8742	88.0023	88.1305	88.1802	88.23	88.154	87.9523	87.7507	87.203	86.6554	85.9851	85.1924	84.3996	83.4289	82.4581	81.417	80.3056	79.1942	78.1554	77.1166	76.1492	75.2532	74.3571	73.6145	72.8719	72.1985	71.5942	70.99	70.5299	70.0698	69.9348	70.125	70.3151	70.7237	71.1323	71.5829	72.0755	72.5681	73.1158	73.6634	74.259	74.9025	75.546	76.364	77.1819
21	2	63.8887	64.5786	65.2684	65.9174	66.5256	67.1337	67.6295	68.1253	68.5637	68.9447	69.3257	69.5611	69.7965	69.9336	69.9725	70.0115	70.5412	71.0709	70.8549	69.893	68.9311	68.6169	68.3027	68.2395	68.4272	68.6149	68.8765	69.138	69.4136	69.7033	69.9929	70.2005	70.4082	70.7318	71.1716	71.6113	72.0085	72.4058	72.8767	73.4214	73.9661	74.6908	75.4156	76.1747	76.968	77.7614	78.7067	79.6519
21	3	78.2041	78.3146	78.425	78.5278	78.623	78.7182	78.5357	78.3532	77.9203	77.2369	76.5535	75.4654	74.3774	73.3596	72.4119	71.4643	70.867	70.2697	69.927	69.8388	69.7507	69.9557	70.1606	70.4026	70.6815	70.9605	71.2534	71.5463	71.916	72.3626	72.8093	73.5978	74.3863	75.3851	76.5943	77.8034	78.9361	80.0687	81.123	82.0989	83.0748	84.276	85.4772	86.991	88.8175	90.644	92.337	94.03
21	4	64.5466	65.286	66.0254	66.6968	67.3001	67.9034	68.4661	69.0288	69.606	70.1978	70.7896	71.4016	72.0135	72.579	73.0978	73.6167	73.9095	74.2024	74.5633	74.9923	75.4213	75.8872	76.3531	76.7524	77.0851	77.4178	77.5562	77.6946	77.7655	77.7689	77.7724	77.446	77.1195	76.337	75.0984	73.8597	72.3258	70.7919	69.612	68.786	67.96	68.0241	68.0882	68.3563	68.8283	69.3003	70.1318	70.9634
21	5	65.5991	66.2411	66.8831	67.2757	67.419	67.5624	67.183	66.8036	66.3932	65.9516	65.5101	65.4449	65.3798	65.5218	65.871	66.2202	66.746	67.2717	67.856	68.4986	69.1412	69.7478	70.3543	70.9794	71.6232	72.267	72.9819	73.6968	74.4264	75.1708	75.9152	76.9503	77.9853	79.0734	80.2145	81.3556	82.5487	83.7417	84.9367	86.1335	87.3302	88.4876	89.645	90.7843	91.9053	93.0264	94.2644	95.5024
22	1	71.7935	72.4413	73.0891	73.6024	73.9813	74.3602	75.18	75.9997	77.1497	78.63	80.1103	81.3344	82.5586	83.49	84.1288	84.7675	84.1434	83.5193	82.5944	81.3689	80.1434	79.391	78.6386	77.5877	76.2383	74.8889	73.2004	71.5119	70.0265	68.7443	67.4621	66.7249	65.9876	65.101	64.0649	63.0288	62.7219	62.415	62.4329	62.7755	63.1181	63.99	64.8618	65.8732	67.024	68.1749	67.9993	67.8237
22	2	85.6746	85.9959	86.3171	86.5327	86.6428	86.7529	86.6389	86.525	86.2965	85.9535	85.6104	85.0111	84.4119	83.6067	82.5957	81.5847	80.3641	79.1434	77.8679	76.5375	75.207	73.8732	72.5394	71.4033	70.465	69.5267	69.1851	68.8435	68.7113	68.7886	68.8658	69.1514	69.4369	69.6301	69.7311	69.832	69.8302	69.8284	69.9397	70.1639	70.3882	71.0018	71.6154	72.4788	73.5922	74.7055	76.1606	77.6156
22	3	75.2738	75.4312	75.5886	75.7435	75.8958	76.0482	76.2553	76.4625	76.7235	77.0385	77.3535	77.8571	78.3607	78.7725	79.0924	79.4123	79.363	79.3138	79.1343	78.8245	78.5147	78.1435	77.7722	77.2011	76.4302	75.6593	74.6308	73.6023	72.5101	71.3542	70.1982	69.1615	68.1248	67.4637	67.178	66.8924	67.0422	67.192	67.5175	68.0186	68.5197	69.2385	69.9572	70.7072	71.4883	72.2694	73.1254	73.9814
22	4	68.0461	67.7774	67.5087	67.2968	67.1417	66.9866	67.1045	67.2225	67.4652	67.8328	68.2004	68.3157	68.4311	68.448	68.3665	68.285	68.2863	68.2875	68.2236	68.0945	67.9653	67.4008	66.8363	66.8942	67.5744	68.2547	68.6607	69.0668	69.3964	69.6496	69.9029	70.1673	70.4318	70.8772	71.5036	72.13	73.1827	74.2354	75.3477	76.5197	77.6917	78.9285	80.1653	81.4022	82.6392	83.8762	84.3558	84.8355
23	1	106.108	106.191	106.274	106.178	105.904	105.63	105.113	104.596	104.017	103.375	102.734	102.141	101.548	100.981	100.438	99.8948	99.1873	98.4798	97.6576	96.7207	95.7838	94.5878	93.3919	91.9689	90.3189	88.6689	86.9897	85.3105	83.6942	82.1408	80.5874	79.2532	77.919	76.7234	75.6666	74.6097	73.9143	73.2188	72.6186	72.1137	71.6089	71.2253	70.8418	70.4895	70.1685	69.8474	69.6439	69.4403
23	2	76.4393	76.6264	76.8135	76.9839	77.1375	77.2911	77.4673	77.6435	77.8457	78.0738	78.3019	78.5604	78.8189	78.9858	79.061	79.1362	78.857	78.5777	78.1093	77.4517	76.7942	75.8089	74.8235	74.0398	73.4578	72.8758	72.3169	71.7581	71.2855	70.8991	70.5127	70.3644	70.2161	70.1735	70.2367	70.2999	70.3864	70.4729	70.6994	71.0658	71.4323	72.2211	73.01	74.0446	75.3249	76.6052	77.7596	78.9141
23	3	67.3057	67.7627	68.2198	68.6712	69.1169	69.5626	70.0664	70.5703	71.1133	71.6954	72.2776	72.8445	73.4115	74.0074	74.6323	75.2572	75.8365	76.4157	76.7948	76.9738	77.1527	76.5198	75.8869	75.3299	74.8487	74.3676	74.2208	74.074	74.0216	74.0637	74.1057	74.2747	74.4438	74.7072	75.0649	75.4227	75.7434	76.0642	76.3842	76.7036	77.0229	77.5053	77.9877	78.6334	79.4423	80.2513	81.1344	82.0175
23	4	58.5496	59.127	59.7044	60.2245	60.6874	61.1502	61.5342	61.9183	62.2783	62.6142	62.9501	63.2611	63.572	63.9711	64.4584	64.9457	65.3716	65.7974	66.1428	66.4078	66.6727	66.6982	66.7238	66.4854	65.9829	65.4804	64.3184	63.1564	62.1906	61.4211	60.6517	60.6919	60.7322	60.9699	61.405	61.8401	62.2764	62.7127	63.0342	63.2408	63.4475	63.6315	63.8155	64.1226	64.5527	64.9829	65.4909	65.999
23	5	57.3001	56.7894	56.2786	55.8073	55.3756	54.9438	54.6041	54.2643	53.9693	53.7188	53.4684	53.2746	53.0808	52.9215	52.7967	52.672	52.6453	52.6186	52.6565	52.759	52.8616	53.1205	53.3795	53.6961	54.0703	54.4445	54.9625	55.4805	56.0375	56.6335	57.2296	57.8677	58.5057	59.1641	59.8426	60.5211	61.3503	62.1794	63.0549	63.9766	64.8984	65.905	66.9116	67.9592	69.0478	70.1364	71.3468	72.5571
24	1	77.5727	78.7185	79.8643	80.9025	81.8331	82.7637	83.5138	84.2639	84.9114	85.4561	86.0009	86.0991	86.1973	85.8933	85.1871	84.4809	83.1719	81.863	80.3983	78.778	77.1577	75.6209	74.0841	73.0393	72.4866	71.9338	71.967	72.0002	72.2066	72.5863	72.9659	73.4785	73.991	74.4223	74.7722	75.1221	75.3263	75.5305	75.6924	75.8121	75.9318	76.1242	76.3165	76.6327	77.0726	77.5126	78.2736	79.0347
24	2	75.1184	76.2501	77.3819	78.3535	79.165	79.9764	80.5383	81.1003	81.5623	81.9245	82.2867	82.4307	82.5747	82.6506	82.6585	82.6664	82.3913	82.1162	81.721	81.2057	80.6904	80.0432	79.3959	78.6889	77.9223	77.1556	76.0487	74.9418	73.8901	72.8935	71.897	71.2803	70.6636	70.3079	70.2133	70.1186	70.093	70.0673	70.0288	69.9775	69.9262	70.025	70.1239	70.3998	70.8529	71.3061	71.9851	72.6641
24	3	88.805	89.2553	89.7056	90.2261	90.8168	91.4075	92.0197	92.6319	93.2195	93.7827	94.3458	94.8784	95.4111	95.7279	95.8289	95.9299	95.6728	95.4158	94.9634	94.3156	93.6678	92.587	91.5062	90.1443	88.5016	86.8588	85.4153	83.9718	82.6473	81.4419	80.2365	79.2383	78.2401	77.2638	76.3095	75.3552	74.515	73.6749	73.0413	72.6142	72.1871	71.9902	71.7933	71.583	71.3594	71.1358	71.1551	71.1744
24	4	77.193	77.0557	76.9183	76.6397	76.2201	75.8005	75.1	74.3995	73.5602	72.5821	71.6041	70.3094	69.0148	68.1895	67.8337	67.4779	67.3144	67.151	67.0264	66.9407	66.8549	66.8546	66.8544	66.7728	66.61	66.4472	66.422	66.3968	66.5739	66.9534	67.3329	68.0597	68.7865	69.3547	69.7642	70.1738	70.6066	71.0394	71.6661	72.4866	73.3072	74.4489	75.5907	76.8285	78.1623	79.4961	81.4041	83.312
25	1	65.1618	65.2362	65.3105	65.3055	65.2211	65.1367	64.9742	64.8117	64.632	64.4352	64.2384	63.9651	63.6918	63.2686	62.6955	62.1223	61.8006	61.4788	61.2888	61.2305	61.1722	61.2446	61.3169	61.3948	61.4782	61.5615	61.6879	61.8143	61.9344	62.0481	62.1619	62.2259	62.29	62.3137	62.297	62.2803	62.4038	62.5272	62.7779	63.1559	63.5339	64.1606	64.7873	65.519	66.3557	67.1924	68.2272	69.2619
25	2	76.2247	76.5669	76.9092	77.2244	77.5127	77.8009	78.1255	78.4501	78.8141	79.2173	79.6206	80.0463	80.4721	80.8477	81.1731	81.4985	81.7717	82.0449	82.2824	82.4843	82.6862	82.7844	82.8825	82.9398	82.9562	82.9726	81.9953	81.0179	80.1705	79.453	78.7356	78.6152	78.4947	78.1316	77.526	76.9203	76.3621	75.8039	75.2196	74.609	73.9984	73.5024	73.0064	72.6629	72.4721	72.2812	72.1568	72.0324
25	3	65.3072	65.4686	65.6301	65.7538	65.8396	65.9254	65.8564	65.7875	65.645	65.429	65.2129	65.078	64.943	64.6927	64.327	63.9613	63.609	63.2567	62.7776	62.1718	61.5659	60.3041	59.0423	57.5683	55.8819	54.1955	53.4543	52.713	52.1008	51.6174	51.1341	50.6329	50.1316	49.7708	49.5503	49.3299	48.7487	48.1674	47.8088	47.6728	47.5369	47.8496	48.1624	48.625	49.2375	49.85	50.6558	51.4616
25	4	61.0987	60.74	60.3813	60.1588	60.0727	59.9865	59.9509	59.9153	59.8393	59.7226	59.606	59.4455	59.285	59.0817	58.8356	58.5895	58.3207	58.052	57.738	57.3789	57.0197	56.4957	55.9717	55.8797	56.2196	56.5595	56.8893	57.219	57.4528	57.5905	57.7283	57.6298	57.5314	57.3958	57.223	57.0502	57.0578	57.0653	57.2852	57.7175	58.1498	58.8903	59.6309	60.424	61.2698	62.1156	62.8497	63.5838
26	1	67.5489	68.7245	69.9001	71.0467	72.1642	73.2817	74.267	75.2522	76.1456	76.947	77.7485	78.3183	78.8882	79.4776	80.0866	80.6956	81.4468	82.198	82.9939	83.8344	84.6748	85.5008	86.3268	87.1215	87.8849	88.6483	89.946	91.2437	92.6202	94.0753	95.5304	97.0443	98.5581	100.278	102.203	104.128	105.804	107.479	108.975	110.291	111.606	112.61	113.613	114.508	115.295	116.082	116.76	117.439
26	2	62.4568	62.9536	63.4503	64.0586	64.7783	65.498	66.1778	66.8577	67.4652	68.0006	68.5359	69.1836	69.8314	70.5328	71.2878	72.0429	72.7589	73.475	74.1645	74.8275	75.4905	76.1051	76.7196	77.0537	77.1073	77.161	77.2771	77.3933	77.5782	77.8319	78.0857	78.4958	78.9059	79.364	79.87	80.3761	81.1273	81.8784	82.642	83.418	84.194	84.9319	85.6699	86.375	87.0475	87.7199	88.5136	89.3072
26	3	62.3685	62.9825	63.5965	64.1959	64.7807	65.3656	66.0136	66.6616	67.3533	68.0886	68.824	69.5088	70.1935	70.7822	71.2747	71.7673	72.1804	72.5935	72.9588	73.2761	73.5934	73.7759	73.9584	74.1552	74.3663	74.5774	74.8443	75.1112	75.4201	75.7709	76.1217	76.572	77.0223	77.5276	78.088	78.6484	79.3112	79.9739	80.7036	81.5003	82.2969	83.1348	83.9727	84.777	85.5476	86.3183	87.143	87.9677
26	4	69.6344	69.6808	69.7273	69.665	69.4938	69.3227	69.2077	69.0927	69.0613	69.1137	69.166	69.131	69.096	69.156	69.3109	69.4658	69.4271	69.3884	69.2287	68.948	68.6674	68.2137	67.7599	67.7736	68.2545	68.7355	68.7706	68.8056	68.7923	68.7305	68.6686	68.6753	68.6819	68.6933	68.7095	68.7257	69.0345	69.3432	69.6892	70.0723	70.4554	70.8921	71.3288	71.8082	72.3303	72.8523	73.918	74.9838
26	5	68.6662	67.9341	67.2021	66.4592	65.7054	64.9516	64.3871	63.8227	63.4005	63.1204	62.8404	62.7155	62.5906	62.6549	62.9084	63.1619	63.4664	63.7709	64.0659	64.3513	64.6368	64.8689	65.101	64.9999	64.5656	64.1313	63.945	63.7588	63.6932	63.7483	63.8034	64.1228	64.4421	64.9498	65.6459	66.3421	67.2149	68.0878	69.0033	69.9614	70.9196	71.9377	72.9558	73.9911	75.0434	76.0957	77.0683	78.0409
[truncated: 78 more columns]

## Sheet: Control4
Session	Step	1	2	3	4	5	6	7	8	9	10	11	12	13	14	15	16	17	18	19	20	21	22	23	24	25	26	27	28	29	30	31	32	33	34	35	36	37	38	39	40	41	42	43	44	45	46	47	48
1	1	71.1206	71.8756	72.6305	73.2068	73.5637	73.9206	73.8598	73.7515	73.5106	73.02	72.5294	72.369	72.2933	72.2185	72.1464	72.0742	72.3104	72.6825	73.0781	73.6143	74.1505	74.7506	75.3947	76.0402	76.7183	77.3964	78.0299	78.6171	79.2042	79.6021	79.9876	80.3237	80.5817	80.8397	81.1131	81.3895	81.6579	81.9065	82.1552	82.3354	82.4909	82.6485	82.8151	82.9818	83.1972	83.4408	83.6909	84.0136
1	2	79.3035	78.7761	78.2487	77.7757	77.3695	76.9633	76.737	76.5312	76.3905	76.3724	76.3542	76.4695	76.619	76.8109	77.1339	77.4569	77.8945	78.3825	78.8802	79.4357	79.9912	80.5707	81.1668	81.7661	82.4423	83.1185	83.7943	84.4696	85.145	85.7229	86.2944	86.8657	87.4365	88.0073	88.6725	89.3561	90.0435	90.7404	91.4373	92.0674	92.6734	93.2693	93.8205	94.3717	94.8951	95.4023	95.9016	96.3114
1	3	69.5019	69.4214	69.3409	69.3049	69.3234	69.3419	69.4389	69.5447	69.6506	69.7564	69.8622	70.0716	70.3075	70.5719	70.9245	71.277	71.6673	72.0742	72.4934	72.9864	73.4794	74.0268	74.6117	75.2016	75.9084	76.6153	77.3514	78.1178	78.8842	79.6589	80.4341	81.2177	82.0143	82.8109	83.6697	84.5407	85.4332	86.3797	87.3263	88.2605	89.1903	90.1088	90.9772	91.8457	92.6817	93.4988	94.3153	95.1242
2	1	69.3382	69.2067	69.0752	69.0319	69.0968	69.1617	69.3799	69.6154	69.9007	70.2794	70.6581	71.1277	71.6205	72.1411	72.7473	73.3535	74.0979	74.9033	75.7035	76.4718	77.2402	78.0406	78.8631	79.6907	80.6356	81.5805	82.5347	83.4985	84.4623	85.3288	86.1891	87.0055	87.7529	88.5002	89.3329	90.1822	91.0716	92.0614	93.0511	94.043	95.0358	96.012	96.9147	97.8174	98.6621	99.4732	100.278	101.007
2	2	69.6656	69.6424	69.6193	69.7075	69.9326	70.1576	70.521	70.9	71.2681	71.6153	71.9626	72.1809	72.3661	72.512	72.5368	72.5616	72.5722	72.5765	72.5881	72.6434	72.6987	72.9185	73.2518	73.5921	74.0964	74.6008	75.1633	75.7864	76.4096	77.0987	77.7922	78.5056	79.2505	79.9954	80.879	81.7896	82.7364	83.7732	84.81	85.917	87.0493	88.1708	89.2438	90.3169	91.3628	92.3929	93.4216	94.4355
2	3	57.9095	57.2845	56.6596	55.9307	55.0742	54.2176	53.4641	52.7223	52.0693	51.5837	51.0981	50.8152	50.5843	50.3955	50.3367	50.278	50.2678	50.2791	50.3006	50.3834	50.4662	50.7204	51.0927	51.4779	52.1649	52.8519	53.6819	54.6607	55.6395	56.8305	58.0354	59.2879	60.6156	61.9432	63.2597	64.574	65.8153	66.874	67.9327	69.0907	70.2847	71.5153	72.9088	74.3023	75.7536	77.2385	78.7198	80.1604
2	4	67.2403	68.2567	69.2731	70.3564	71.5219	72.6874	73.7405	74.7808	75.7799	76.7012	77.6225	78.5035	79.3741	80.249	81.1369	82.0248	83.0368	84.1035	85.1751	86.2762	87.3773	88.3999	89.3685	90.3386	91.3447	92.3508	93.332	94.2873	95.2426	96.2266	97.2125	98.3195	99.6177	100.916	102.571	104.296	105.988	107.597	109.206	110.507	111.697	112.829	113.704	114.579	115.325	115.997	116.658	117.198
2	5	91.2944	91.472	91.6496	91.987	92.5203	93.0536	93.1496	93.196	93.1849	93.0658	92.9467	92.984	93.0614	93.1658	93.3535	93.5413	93.5369	93.4477	93.3986	93.5898	93.781	93.9456	94.092	94.2519	94.728	95.2042	95.7608	96.4014	97.0419	97.4878	97.921	98.2245	98.3232	98.4218	98.8148	99.2652	99.764	100.384	101.004	101.568	102.111	102.663	103.248	103.833	104.538	105.311	106.089	106.922
2	6	61.0818	62.0741	63.0663	63.9832	64.8077	65.6322	66.4375	67.2405	68.0583	68.9036	69.7489	70.5753	71.3969	72.1957	72.9242	73.6528	74.4741	75.3364	76.2059	77.1185	78.0311	78.9786	79.9503	80.9246	81.9594	82.9943	84.0103	85.0067	86.0031	86.9414	87.876	88.8137	89.7563	90.699	91.656	92.6159	93.5815	94.5616	95.5417	96.5288	97.5184	98.5039	99.4709	100.438	101.404	102.37	103.333	104.26
3	1	47.2519	47.6404	48.0289	48.3091	48.4564	48.6037	48.7586	48.9143	49.3049	50.1375	50.97	51.6626	52.3193	52.975	53.6276	54.2803	54.9746	55.6872	56.4002	57.1152	57.8301	58.8153	59.9869	61.1689	62.5961	64.0234	65.3549	66.5869	67.8188	69.097	70.3781	71.6948	73.0673	74.4399	75.9118	77.403	78.9471	80.6233	82.2996	84.1232	86	87.9075	89.9507	91.994	94.1199	96.2938	98.4756	100.747
3	2	55.7305	57.0531	58.3756	59.462	60.2585	61.0549	62.3267	63.6524	65.1014	66.7823	68.4633	69.3853	70.1128	70.97	72.2274	73.4848	74.0539	74.3193	74.6275	75.1931	75.7587	76.3451	76.9459	77.5612	78.5155	79.4699	80.2752	80.9253	81.5753	81.7724	81.9399	82.198	82.5994	83.0007	83.3742	83.7423	83.9761	83.8742	83.7724	84.3956	85.2805	86.3468	88.2189	90.091	91.5997	92.8975	94.1693	95.1476
3	3	60.7718	60.9651	61.1583	61.2564	61.2377	61.219	60.7775	60.2879	59.8293	59.429	59.0287	58.6719	58.3261	58.1409	58.4502	58.7596	59.0428	59.3144	59.5473	59.5478	59.5483	59.6323	59.7738	59.9199	60.176	60.432	60.6776	60.9123	61.147	61.4614	61.781	62.265	63.0087	63.7523	64.5662	65.3938	66.2471	67.1646	68.0821	69.1057	70.1676	71.2381	72.3464	73.4547	74.6108	75.7946	76.9792	78.1723
3	4	43.0652	43.1547	43.2441	43.3201	43.3797	43.4394	43.4395	43.4329	43.29	42.8907	42.4914	41.9011	41.2619	40.7587	40.6749	40.5912	40.6255	40.7119	40.8563	41.3482	41.8402	42.3869	42.9714	43.559	44.2187	44.8784	45.579	46.3222	47.0654	47.8212	48.5779	49.3347	50.0917	50.8486	51.6382	52.4341	53.2419	54.0794	54.917	55.9177	56.9773	58.0547	59.2112	60.3676	61.7376	63.2316	64.737	66.3704
3	5	65.5401	66.2085	66.877	67.5657	68.2794	68.993	69.7967	70.6107	71.4464	72.3231	73.1998	74.1071	75.0221	75.9501	76.918	77.8859	78.9113	79.9621	81.0484	82.3473	83.6463	84.9662	86.3004	87.6358	88.9987	90.3615	91.7579	93.1891	94.6203	96.0541	97.4881	98.9069	100.302	101.697	103.094	104.491	105.889	107.289	108.689	109.933	111.12	112.304	113.47	114.636	115.993	117.46	118.912	120.204
4	1	72.1808	72.7788	73.3769	74.0166	74.7074	75.3982	76.1602	76.9302	77.7192	78.5437	79.3682	80.2189	81.0763	81.9398	82.8221	83.7044	84.5627	85.4102	86.2618	87.1373	88.0128	88.8968	89.7868	90.6757	91.5379	92.4	93.2186	93.9916	94.7647	95.4115	96.05	96.7749	97.636	98.4972	99.2412	99.9624	100.676	101.369	102.063	102.745	103.423	104.095	104.741	105.386	106.002	106.601	107.198	107.775
4	2	66.4676	67.1382	67.8088	68.5032	69.2268	69.9503	70.7492	71.5567	72.3877	73.2628	74.1379	75.0358	75.9395	76.8535	77.799	78.7445	79.7135	80.6929	81.6678	82.6163	83.5648	84.5126	85.4599	86.408	87.3742	88.3404	89.2957	90.2398	91.1839	92.1171	93.0497	93.9682	94.8647	95.7612	96.6274	97.4877	98.3363	99.1559	99.9755	100.759	101.53	102.288	102.993	103.699	104.358	104.99	105.619	106.221
4	3	62.5824	63.4632	64.344	65.1709	65.9315	66.6922	67.4471	68.2014	68.9054	69.5151	70.1247	70.7509	71.3813	72.0477	72.825	73.6024	74.4248	75.2672	76.0961	76.8446	77.5931	78.406	79.2635	80.1201	80.9565	81.7928	82.6575	83.5515	84.4456	85.3488	86.2526	87.1723	88.1174	89.0624	89.9266	90.775	91.6106	92.4145	93.2183	93.9546	94.6665	95.4038	96.2541	97.1044	97.9724	98.8508	99.7249	100.552
5	1	67.8426	68.5045	69.1664	69.8412	70.5318	71.2223	71.8403	72.45	73.0359	73.5766	74.1174	74.6523	75.1856	75.7253	76.2842	76.8432	77.3928	77.9384	78.4875	79.0579	79.6283	80.2887	81.0113	81.74	82.6121	83.4843	84.3803	85.3011	86.2219	87.217	88.217	89.2193	90.225	91.2307	92.1695	93.0952	94.0011	94.8576	95.7141	96.5713	97.4287	98.2602	98.9767	99.6931	100.418	101.147	101.879	102.637
5	2	54.3034	54.0825	53.8616	53.8078	53.9593	54.1108	54.3893	54.6822	55.0155	55.4249	55.8343	56.3945	56.9934	57.6449	58.4584	59.2719	60.1495	61.0554	61.9688	62.9276	63.8864	64.9215	66.0093	67.0987	68.2279	69.357	70.4687	71.562	72.6554	73.8493	75.0497	76.2818	77.5638	78.8458	80.0901	81.327	82.5388	83.6879	84.8369	85.975	87.1093	88.2255	89.2615	90.2976	91.3407	92.3881	93.4369	94.5031
5	3	64.6163	65.3788	66.1412	66.8852	67.6066	68.3279	69.0595	69.7922	70.5084	71.1934	71.8785	72.6234	73.3837	74.1572	74.9713	75.7854	76.6558	77.5509	78.4531	79.3977	80.3423	81.2525	82.139	83.0271	83.9539	84.8806	85.8422	86.8401	87.838	88.8929	89.9515	90.9811	91.965	92.9488	93.9379	94.9279	95.9197	96.9158	97.9119	98.9181	99.928	100.943	101.98	103.017	104.079	105.157	106.244	107.428
5	4	44.1558	44.7799	45.4039	46.0883	46.8466	47.605	48.2884	48.9634	49.6351	50.3009	50.9667	51.6681	52.3785	53.1002	53.8565	54.6128	55.3847	56.1636	56.9414	57.7125	58.4836	59.2788	60.0907	60.9082	61.8587	62.8091	63.7438	64.6622	65.5805	66.5705	67.5651	68.6109	69.7375	70.864	72.051	73.2497	74.4568	75.6849	76.9129	78.1673	79.4312	80.7061	82.0301	83.354	84.7065	86.0755	87.441	88.7674
5	5	66.1908	66.6819	67.173	67.7142	68.3169	68.9196	69.5713	70.2286	70.8887	71.554	72.2193	72.8906	73.5634	74.242	74.9385	75.635	76.3314	77.0278	77.7148	78.3447	78.9746	79.5914	80.199	80.8134	81.5866	82.3597	83.1795	84.0479	84.9163	85.8237	86.7338	87.5981	88.3905	89.1829	89.886	90.5716	91.2787	92.0397	92.8006	93.5878	94.3844	95.1878	96.0206	96.8534	97.658	98.4463	99.235	100.029
6	1	62.0946	62.5414	62.9881	63.4748	64.0104	64.546	65.2285	65.9278	66.6797	67.5307	68.3817	69.2638	70.1538	71.0516	71.9733	72.8951	73.8655	74.8574	75.8536	76.8756	77.8975	78.9202	79.9433	80.966	81.9806	82.9951	84.0184	85.0509	86.0834	87.1282	88.1737	89.2114	90.2368	91.2622	92.2568	93.2453	94.2287	95.1994	96.17	97.0977	98.0099	98.9157	99.7933	100.671	101.524	102.363	103.197	103.98
6	2	75.6071	76.8695	78.1318	79.2487	80.187	81.1253	81.8021	82.4491	82.8745	82.8829	82.8912	81.7067	80.2162	78.9505	78.3773	77.8041	77.3514	76.9518	76.5614	76.2262	75.8911	75.5734	75.2678	74.9657	74.7485	74.5314	74.4789	74.5979	74.7169	75.1689	75.6426	76.173	76.793	77.4131	77.8957	78.3515	78.598	78.3214	78.0447	77.8386	77.6579	77.5818	77.9704	78.359	79.0566	79.9338	80.8592	82.328
6	3	71.4159	72.1779	72.94	73.5278	73.902	74.2761	73.9934	73.6361	73.1001	72.2278	71.3555	70.786	70.2941	69.8483	69.5443	69.2404	68.8819	68.4994	68.1065	67.6504	67.1943	66.8257	66.5174	66.24	66.6891	67.1381	67.4782	67.7048	67.9314	68.7871	69.6839	70.5743	71.4546	72.335	72.8301	73.25	73.6088	73.815	74.0212	75.0864	76.4618	77.9065	79.659	81.4115	83.5494	85.9112	88.3227	91.2933
6	4	56.4807	57.3957	58.3107	59.2431	60.1969	61.1507	61.9368	62.7038	63.4189	64.0363	64.6538	65.4334	66.2547	67.0501	67.7657	68.4813	68.7568	68.8381	68.8606	68.53	68.1993	67.8123	67.3863	66.9754	66.9205	66.8656	66.8969	67.0181	67.1393	67.0918	67.0333	67.0014	67.0114	67.0214	67.1985	67.4081	67.6207	67.8404	68.0601	68.9276	70.0291	71.116	72.1386	73.1613	74.2421	75.3566	76.4954	77.9063
6	5	67.6448	67.9546	68.2643	68.637	69.0867	69.5364	70.1027	70.6821	71.3035	72.0036	72.7038	73.4967	74.3134	75.0209	75.3918	75.7627	76.1358	76.5099	76.883	77.25	77.6171	77.9591	78.2839	78.6044	78.8236	79.0428	79.4441	80.0349	80.6258	81.1959	81.7647	82.3345	82.9061	83.4777	84.126	84.7892	85.5357	86.4904	87.445	88.2454	88.99	89.7599	90.6423	91.5248	92.5279	93.601	94.6906	95.9643
7	1	84.5181	85.2949	86.0716	86.7882	87.431	88.0738	88.6242	89.164	89.6792	90.1481	90.617	91.0955	91.5764	92.0348	92.4236	92.8124	93.1399	93.4404	93.7327	93.9761	94.2194	94.4594	94.6969	94.9336	95.1509	95.3681	95.5856	95.8032	96.0209	96.4021	96.7939	97.3348	98.1109	98.8871	99.792	100.722	101.673	102.678	103.682	105.562	107.759	109.771	110.961	112.151	113.024	113.713	114.402	115.096
7	2	66.4665	67.0529	67.6394	68.2031	68.7389	69.2747	69.4972	69.6841	69.582	68.9359	68.2898	67.6679	67.0522	66.4888	66.0864	65.684	65.459	65.3122	65.2171	65.4318	65.6464	65.8453	66.0332	66.225	66.509	66.793	67.1472	67.5745	68.0018	68.6535	69.3198	69.9802	70.6314	71.2826	71.8994	72.5094	73.1031	73.6563	74.2094	74.7601	75.3098	75.8776	76.5253	77.1731	77.9849	78.892	79.8382	81.2234
7	3	66.2149	66.5164	66.8178	67.2471	67.8333	68.4194	69.0287	69.6405	70.1303	70.3904	70.6505	70.7723	70.8587	70.819	70.3911	69.9632	69.2145	68.3242	67.3962	66.2421	65.0881	64.3409	63.8742	63.4195	63.2433	63.0671	62.9878	63.0094	63.0311	63.2547	63.4915	63.7094	63.8977	64.086	64.2112	64.3242	64.4123	64.4384	64.4646	64.6491	64.8908	65.1178	65.2795	65.4412	65.6875	65.9829	66.3105	67.0008
7	4	77.224	78.6672	80.1104	81.3697	82.4032	83.4368	83.9739	84.4546	84.6454	84.2906	83.9358	83.3792	82.7708	82.1105	81.2897	80.469	79.531	78.5413	77.5412	76.479	75.4168	74.6072	73.9718	73.3423	72.8545	72.3668	71.9459	71.5948	71.2436	71.3952	71.5795	71.7427	71.8725	72.0023	72.0785	72.1443	72.1911	72.1905	72.1899	72.3303	72.5217	72.7608	73.2122	73.6636	74.2921	75.0234	75.7825	76.8545
7	5	84.8682	85.3338	85.7994	86.147	86.35	86.5529	86.4935	86.4042	86.1853	85.7222	85.2592	84.3411	83.3062	82.3304	81.5367	80.743	80.1053	79.5365	78.962	78.3533	77.7446	77.1748	76.6317	76.0932	75.6612	75.2291	74.8699	74.5865	74.303	74.3147	74.3455	74.4145	74.5436	74.6727	74.9227	75.1963	75.5236	75.985	76.4465	77.2247	78.1172	78.9996	79.837	80.6744	81.5375	82.4156	83.3063	84.3395
7	6	66.1493	66.1058	66.0624	65.9542	65.7664	65.5787	65.2734	64.9546	64.5912	64.1437	63.6962	63.4133	63.1725	62.8897	62.4775	62.0652	61.5226	60.9226	60.3014	59.554	58.8065	57.6767	56.2832	54.8823	53.3096	51.7369	50.241	48.8251	47.4091	47.5896	47.8742	48.1916	48.561	48.9303	49.3106	49.693	50.0702	50.4347	50.7992	51.3162	51.8883	52.5064	53.3293	54.1522	55.1955	56.3669	57.5796	59.2578
8	1	59.9434	60.2923	60.6411	60.9124	61.0886	61.2648	61.1733	61.0513	61.1316	61.5926	62.0536	62.6786	63.3457	63.9997	64.6136	65.2274	65.8653	66.5139	67.1682	67.8565	68.5448	69.1294	69.6426	70.1552	70.6551	71.1549	71.6974	72.2843	72.8711	73.818	74.7883	75.8724	77.136	78.3996	79.6115	80.8134	81.9603	82.97	83.9797	84.6675	85.2392	85.8321	86.5198	87.2076	87.9357	88.6872	89.4523	90.3703
8	2	52.9351	53.497	54.0589	54.6142	55.1612	55.7082	56.2321	56.7534	57.2525	57.71	58.1675	58.6228	59.0776	59.5774	60.216	60.8547	61.4138	61.9379	62.4434	62.8366	63.2298	63.81	64.5192	65.2349	66.105	66.975	68.0364	69.2973	70.5581	71.8492	73.1423	74.445	75.7628	77.0806	78.5283	80.0013	81.4765	82.957	84.4375	85.9117	87.3836	88.8519	90.3038	91.7558	93.2001	94.6399	96.0746	97.4518
9	1	86.1183	86.2151	86.3119	86.0769	85.4345	84.7921	83.7124	82.583	81.3734	80.013	78.6526	77.6706	76.7856	75.7881	74.4434	73.0987	71.6158	70.0719	68.5326	67.0206	65.5085	64.404	63.5806	62.7642	62.1133	61.4625	60.931	60.5238	60.1167	59.9566	59.8126	59.6658	59.5145	59.3632	59.1339	58.8894	58.734	58.8011	58.8682	59.3659	60.0192	60.8813	62.6722	64.463	66.9021	69.7177	72.5601	75.7029
9	2	86.4641	87.2224	87.9807	88.4759	88.6483	88.8206	88.7795	88.7141	88.6685	88.6599	88.6513	87.9662	87.1077	86.192	85.0996	84.0072	82.8552	81.6769	80.5029	79.3547	78.2066	77.1488	76.1534	75.1633	74.3005	73.4377	72.6426	71.9182	71.1938	70.5844	69.9825	69.3432	68.6448	67.9465	67.2712	66.6004	65.9908	65.534	65.0773	64.8377	64.6766	64.5556	64.6125	64.6695	64.9367	65.326	65.7549	66.6289
9	3	59.9786	61.4095	62.8404	64.2054	65.4894	66.7734	68.1927	69.6274	71.1991	73.0287	74.8584	76.3023	77.6472	78.8294	79.5097	80.19	80.8846	81.5854	82.356	83.5449	84.7338	85.8443	86.9007	87.9668	89.2606	90.5543	91.8442	93.1301	94.4159	95.561	96.6968	97.7909	98.819	99.8471	101.591	103.475	105.378	107.332	109.285	110.983	112.589	114.076	115.035	115.994	116.976	117.969	118.962	119.936
10	1	88.8251	89.2464	89.6677	89.9804	90.1596	90.3389	90.5518	90.7686	91.053	91.4647	91.8764	92.4671	93.1037	93.5689	93.5054	93.442	93.5861	93.8216	93.9648	93.5536	93.1424	92.1251	90.6898	89.2349	87.3188	85.4027	83.2206	80.7615	78.3024	75.816	73.3277	70.7731	68.1136	65.4542	62.8416	60.2382	57.9973	56.6631	55.3288	54.6802	54.2793	53.9122	53.6955	53.4787	53.6432	54.0289	54.4914	55.8166
10	2	82.34	83.1635	83.9871	84.7368	85.3958	86.0548	86.591	87.1132	87.5833	87.9555	88.3277	88.5257	88.6791	88.4459	87.0204	85.595	83.8866	82.0532	80.2187	78.3769	76.5351	74.8507	73.2748	71.716	70.558	69.4001	68.4367	67.6762	66.9156	65.9748	65.0222	64.0472	63.0369	62.0265	61.0797	60.1454	59.2477	58.4418	57.6359	56.9518	56.3118	55.7812	55.737	55.6927	56.3392	57.3868	58.5412	60.8964
10	3	87.8118	88.0264	88.2411	88.4657	88.7023	88.939	89.1954	89.4541	89.7295	90.0361	90.3428	90.7366	91.1527	91.544	91.8593	92.1745	92.4364	92.6747	92.8835	92.9155	92.9475	92.8156	92.5708	92.3148	91.7981	91.2813	90.6056	89.7643	88.923	87.6924	86.4364	85.0717	83.5353	81.9988	80.3139	78.6001	76.8303	74.9207	73.0111	72.0063	71.3282	70.6747	70.1306	69.5865	69.0644	68.5553	68.0568	67.6787
11	1	57.472	58.2372	59.0025	59.7845	60.5869	61.3893	62.1914	62.9935	63.7698	64.4976	65.2255	66.0062	66.8005	67.6048	68.4401	69.2754	70.1283	70.989	71.858	72.777	73.696	74.6324	75.5806	76.5295	77.4947	78.4598	79.4389	80.4324	81.4259	82.3579	83.2859	84.2027	85.1019	86.0012	86.9657	87.943	88.9328	89.9541	90.9754	91.983	92.9856	93.9784	94.9274	95.8764	96.7947	97.6953	98.593	99.4592
11	2	62.9489	63.6584	64.3678	65.1097	65.8913	66.6729	67.5384	68.4134	69.3134	70.2607	71.2079	72.1672	73.1296	74.0903	75.0459	76.0015	76.9389	77.8683	78.7939	79.697	80.6001	81.4716	82.3213	83.1698	83.9907	84.8117	85.6296	86.4444	87.2592	88.0809	88.9031	89.7227	90.5381	91.3536	92.1429	92.927	93.7138	94.5075	95.3011	96.1174	96.9418	97.7576	98.535	99.3125	100.054	100.774	101.494	102.21
11	3	60.9705	61.4058	61.8411	62.2501	62.6268	63.0036	63.4443	63.8923	64.2692	64.5122	64.7553	65.0874	65.4424	65.7785	66.0566	66.3347	66.4907	66.5928	66.6711	66.6064	66.5418	66.6727	66.9385	67.22	67.8693	68.5187	69.3792	70.4598	71.5404	72.8232	74.1192	75.3992	76.6541	77.909	79.0933	80.2639	81.4039	82.4675	83.5311	84.5526	85.5588	86.5739	87.6286	88.6833	89.8477	91.0759	92.3188	93.7273
11	4	62.1833	62.799	63.4146	64.0317	64.6505	65.2692	65.857	66.4412	67.0098	67.5488	68.0878	68.7215	69.3796	70.0374	70.6946	71.3518	71.9673	72.5644	73.1546	73.7036	74.2526	74.8445	75.4661	76.0995	77.0094	77.9194	78.8975	79.9466	80.9957	82.0028	83.0072	84.0005	84.9763	85.9521	86.922	87.8907	88.8456	89.766	90.6864	91.555	92.4049	93.2495	94.0703	94.8912	95.7231	96.5613	97.4001	98.2458
11	5	47.3731	47.4998	47.6265	47.7632	47.912	48.0609	48.275	48.4964	48.7556	49.0857	49.4159	49.7687	50.1274	50.4698	50.762	51.0542	51.5987	52.2545	52.9091	53.5562	54.2033	54.8411	55.4724	56.1059	56.7919	57.478	58.1668	58.8586	59.5503	60.2159	60.8797	61.5528	62.2406	62.9284	63.6269	64.3274	65.0282	65.7293	66.4304	67.1913	67.9738	68.7709	69.633	70.4951	71.4146	72.3675	73.3288	74.3833
11	6	65.0292	65.34	65.6509	65.9706	66.3013	66.632	66.9858	67.3422	67.7332	68.1894	68.6456	69.1734	69.7196	70.303	71.0008	71.6986	72.4576	73.2435	74.0344	74.8545	75.6746	76.4959	77.3179	78.1428	79.0343	79.9257	80.86	81.8391	82.8181	83.7819	84.7447	85.6653	86.5192	87.3732	88.1107	88.8255	89.5156	90.1443	90.7729	91.4008	92.0284	92.6554	93.2796	93.9039	94.5253	95.1451	95.7644	96.377
12	1	68.0608	68.5193	68.9778	69.4288	69.8704	70.3121	70.7409	71.1683	71.6058	72.0624	72.5191	73.0599	73.6222	74.2331	74.9937	75.7543	76.5807	77.436	78.297	79.1917	80.0864	81.0074	81.9466	82.8875	83.8694	84.8514	85.8497	86.8652	87.8806	88.9073	89.9348	90.9224	91.8469	92.7714	93.6543	94.529	95.3936	96.2329	97.0721	97.9517	98.8459	99.7506	100.702	101.654	102.568	103.46	104.353	105.249
12	2	56.5302	57.1749	57.8196	58.4348	59.0139	59.593	60.2312	60.8761	61.5291	62.1973	62.8655	63.4786	64.0777	64.6523	65.1517	65.6511	66.1692	66.6956	67.2479	67.9557	68.6635	69.4464	70.2812	71.1197	72.0468	72.9739	73.9366	74.9366	75.9366	76.9942	78.0555	79.0914	80.0872	81.0829	82.0295	82.9664	83.8991	84.8211	85.7431	86.6783	87.6183	88.5621	89.5232	90.4843	91.4353	92.3804	93.3164	94.1488
12	3	70.0323	70.7285	71.4247	72.0621	72.6271	73.1921	73.7829	74.3766	74.9742	75.5793	76.1844	76.78	77.3731	77.9907	78.6837	79.3767	80.2122	81.1105	81.9953	82.7999	83.6045	84.4137	85.2262	86.0383	86.8437	87.6491	88.4529	89.255	90.0571	90.9341	91.816	92.695	93.5696	94.4442	95.2423	96.0256	96.7857	97.4878	98.1899	98.9102	99.637	100.374	101.157	101.941	102.71	103.472	104.244	105.128
12	4	66.463	67.1851	67.9072	68.6459	69.4052	70.1645	70.9509	71.7405	72.5388	73.3536	74.1684	75.0199	75.8808	76.7678	77.7353	78.7027	79.6874	80.6797	81.6692	82.642	83.6149	84.5629	85.4938	86.4222	87.291	88.1598	89.0004	89.8116	90.6227	91.4142	92.2045	92.9849	93.7499	94.5148	95.2589	95.9989	96.7292	97.4348	98.1405	98.8123	99.4718	100.123	100.738	101.352	101.949	102.535	103.119	103.673
[truncated: 78 more columns]

## Sheet: TeTX1.xls
Session	Step	1	2	3	4	5	6	7	8	9	10	11	12	13	14	15	16	17	18	19	20	21	22	23	24	25	26	27	28	29	30	31	32	33	34	35	36	37	38	39	40	41	42	43	44	45	46	47	48
1	1	64.4863	61.2071	57.924	54.6299	51.7669	49.2898	48.3588	47.9747	49.9716	52.4951	56.1405	60.3491	64.96	67.9299	70.4074	71.3134	70.8823	68.2227	63.2826	57.0535	52.6113	48.2607	43.4062	39.4857	36.8005	35.1686	34	35.8067	38.4643	43.6473	47.9831	51.4233	56.3439	61.7539	66.8819	72.1755	77.8998	83.221	88.2012	91.7114	94.8554	97.8478	100.289	101.628	102.942	104.24	104.319	104.195
1	2	49.6954	49.7765	49.8689	49.993	50.2442	50.6092	50.9928	51.3594	51.352	51.3331	51.2895	51.1672	50.9888	50.0549	49.0021	48.0878	47.2507	46.5426	45.8971	45.2872	44.6889	44.1881	44.1681	44.0844	43.9167	43.7516	43.5877	43.3844	43.215	43.1698	43.0459	42.8387	43.3666	44.14	44.9512	46.4086	49.546	53.1654	57.1926	59.9844	62.427	64.1858	65.4421	65.6931	63.3317	59.2083	52.2196	45.175
1	3	60.9583	61.4053	61.9999	63.0065	64.0912	65.2459	66.5458	67.9134	69.7839	71.4578	72.7131	74.1212	75.6383	76.1691	76.4086	75.7403	75.0336	74.2629	72.9873	71.4263	70.2304	68.9288	66.9021	64.8492	62.7615	61.3851	60.3216	58.0954	55.9282	54.144	52.4459	50.8388	49.7011	48.7355	48.8665	49.32	50.6119	52.7841	55.7012	58.1016	60.3522	62.2669	64.3006	66.5722	69.5616	73.0349	76.0163	78.9849
1	4	65.1318	67.6435	70.077	72.2925	74.3896	76.3808	78.1899	79.932	81.3495	82.5033	83.0952	83.4056	83.5148	83.4145	83.269	83.0652	82.8236	82.5192	81.9441	81.2161	80.4157	79.6171	78.8662	78.1826	77.5879	77.4612	77.5403	78.3353	78.7586	77.7726	76.8809	76.0889	75.5904	75.1994	75.4912	75.6786	75.5947	73.9969	71.1183	68.7859	66.6894	65.9871	65.3359	64.7866	64.1051	63.3345	62.8008	62.6025
1	5	57.5257	57.5915	57.7122	57.9857	58.3644	58.8373	59.5017	60.2224	61.0434	61.8741	62.7253	63.3963	63.9386	64.9088	65.9544	66.9861	67.5448	67.3149	66.6789	65.8133	65.1273	64.6936	65.4246	66.1251	66.7855	67.0436	67.1246	65.9914	64.8862	64.0641	63.1497	62.1376	60.7885	59.3063	56.3597	53.7526	52.0278	51.3074	51.4367	52.9366	54.837	57.6695	60.8325	64.6567	69.1577	74.1153	78.5429	82.8016
1	6	61.1599	62.6845	64.24	65.8816	67.5428	69.2216	70.8291	72.4076	73.8132	75.0995	76.1317	76.8116	77.2399	77.4758	77.6335	77.4433	77.242	77.0223	76.7187	76.3677	76.1701	75.9164	75.3	74.3626	73.0009	71.5376	70.0295	66.8801	63.2703	58.2989	52.2883	45.1793	40.1019	35.7381	33.9543	33.0822	34.5808	37.9081	42.7828	48.7953	55.2649	64.1793	72.5793	79.9507	86.8477	93.4249	95.9622	97.9034
1	7	56.887	58.2711	59.6871	61.1924	62.5974	63.9128	64.6428	65.1442	64.3776	63.0287	60.4395	58.3676	56.6651	54.3406	51.8459	48.887	46.074	43.5044	42.0574	41.2449	41.8263	42.6933	44.2375	46.3518	49.2202	52.7523	56.5765	60.7262	65.0262	69.8028	74.2183	78.2521	81.6446	84.8157	87.4457	90.0135	92.4193	94.783	97.111	97.5784	97.5904	97.5194	97.4365	97.3295	97.2486	97.1851	97.2329	97.3252
1	8	63.9544	65.4151	66.6683	67.3429	68.1191	68.9863	69.474	69.8518	70.0559	70.241	70.3859	70.4007	70.3226	69.7418	69.2213	69.9082	70.2991	70.1966	69.8954	69.4818	69.4729	69.4972	69.4694	69.1878	68.5707	67.9413	67.3065	67.5201	67.5945	67.0524	66.0899	64.683	61.7132	58.2192	54.4985	50.8775	47.5161	44.0196	40.4088	38.5343	37.3558	39.8899	42.2136	44.1165	45.7242	47.1328	49.8428	52.6501
2	1	41.1094	41.8919	42.6518	43.1396	43.6105	43.9882	44.3143	44.4678	44.5967	44.6701	44.4667	43.8203	43.6603	44.0676	44.5888	45.2077	45.9044	46.6499	47.403	48.1594	49.036	49.9487	50.0014	49.8978	49.9253	49.9637	50.2627	50.5037	50.0495	49.6147	49.2867	48.7922	47.7428	46.6916	45.6363	45.1012	45.3986	46.3176	47.9617	50.0756	52.5922	56.8387	62.1663	67.4525	72.7202	77.5874	82.3345	87.2283
2	2	68.2952	63.0299	57.5915	55.8714	58.4749	61.6411	64.9941	68.434	67.9344	67.1899	66.5024	65.8567	65.1202	64.5845	64.0393	63.4476	62.5201	61.6215	60.5786	59.3954	58.4425	57.7969	55.1269	52.4828	50.1292	47.6358	45.2143	44.725	44.3392	44.0134	43.7631	43.3099	43.0319	42.7529	42.3767	41.9714	41.6263	41.4122	41.1563	41.1522	41.2448	41.5243	41.9105	42.7498	43.1626	43.4458	44.2105	44.3818
2	3	77.6284	77.7892	77.9499	76.6916	75.3042	73.836	72.3518	70.7938	69.2113	68.165	67.387	67.0178	66.9407	67.7507	69.4478	71.3745	73.6229	76.1948	79.414	82.3273	84.3225	86.2446	87.8005	89.3613	90.975	92.5886	94.0802	95.5718	93.0196	90.0998	87.9834	86.0277	84.6444	83.4518	80.5706	76.845	73.2202	69.6674	66.4912	63.6915	60.2832	56.0229	51.2433	45.4252	41.4972	43.2393	44.4237	42.8189
2	4	45.9034	45.9898	46.0762	47.2934	48.9347	50.625	52.3741	54.3492	57.3415	60.3338	61.7074	62.9191	64.6365	66.6428	67.867	67.7223	67.7009	68.9112	70.1215	69.4551	68.3716	68.7171	70.2534	71.2769	70.9328	70.5888	72.0531	73.5175	72.5207	70.6009	69.5483	69.5364	69.0311	66.3055	63.58	60.5784	57.5493	54.5392	51.5401	49.5252	49.2325	48.9845	49.1828	49.3812	52.9015	57.16	63.1835	70.6779
2	5	59.2908	59.008	58.73	58.7503	58.7767	58.9869	59.2051	59.5833	59.9435	60.0395	60.1726	60.7353	61.2912	61.782	62.2733	62.77	63.2758	63.8448	64.4363	65.1628	65.9195	66.8363	67.4572	66.6791	65.8611	64.8739	64.35	65.608	66.9134	68.3846	69.8866	71.4875	73.0005	74.2556	75.5833	77.1074	77.2292	73.8453	70.615	67.7403	65.017	62.6194	60.4127	58.5878	55.9186	51.676	49.2207	49.8735
2	6	69.9132	71.0555	72.1977	73.2375	74.1747	75.1119	75.4794	75.8469	76.2153	76.5846	76.9538	77.4153	77.8767	78.1314	78.1794	78.2273	78.6248	79.0222	79.6569	80.5288	81.4007	82.7104	84.0201	85.3365	86.6597	87.9829	88.6294	89.2758	89.3889	88.9688	88.5486	89.3601	90.1717	88.9149	85.5898	82.2648	75.5945	68.9242	66.0009	66.8246	67.6482	65.6528	63.6575	60.7828	57.0289	53.2749	53.9716	54.6683
2	7	69.1823	69.887	70.5917	71.4345	72.3027	73.0896	73.84	74.472	75.0011	75.582	76.2478	76.8852	77.4242	77.947	78.2511	78.5552	78.8555	79.1555	79.2046	79.174	78.1948	76.5923	74.7724	72.6849	70.6171	68.5965	66.2697	62.0288	57.7879	54.0546	50.3302	49.3946	49.04	49.5691	50.5289	52.4807	55.3584	58.9745	63.8916	68.0807	69.4791	70.7327	69.3293	67.9259	65.6032	63.1744	59.7213	55.9109
2	8	62.3239	63.3194	64.3149	65.26	66.177	67.1229	68.1422	69.1614	70.2136	71.2684	72.0729	72.6856	73.1803	73.2251	73.2699	73.3102	73.3499	73.1912	72.8268	72.4597	72.0754	71.6911	71.9435	72.3823	72.8124	73.2303	73.6773	74.6099	75.5426	76.4728	77.4019	78.6872	80.6649	82.6427	83.3968	84.1274	84.4587	84.548	84.1115	82.2106	80.3096	77.8917	75.42	74.0807	73.6785	72.4728	67.8119	63.1509
3	1	101.31	98.6824	96.0549	93.4273	92.8101	93.4165	94.412	95.0438	94.4562	93.6042	92.5393	90.0492	87.1854	83.6128	79.9493	76.1896	72.3042	68.5124	65.7554	63.6466	62.4368	60.8706	59.1292	56.3654	53.6814	51.1448	49.21	47.5822	46.2419	45.8045	47.6252	49.446	51.2667	52.5046	53.6775	54.8356	55.1662	54.7541	54.1227	53.5866	53.839	54.2387	54.8117	57.7464	61.5325	66.9835	72.4632	77.9873
3	2	64.4072	64.2196	64.0459	63.9029	63.8698	63.9036	63.8755	63.8038	63.6104	63.361	63.0663	62.6224	62.1116	61.3961	60.5169	59.4649	58.3434	57.0116	54.09	50.6926	46.6353	42.9751	39.5187	37.408	35.9083	35.5367	36.1783	37.3368	41.8772	46.9222	53.0039	59.5689	66.4633	73.2295	79.6628	84.9385	89.5032	93.4298	97.3841	101.21	104.271	106.16	106.671	106.379	105.814	104.88	103.727	102.235
3	3	70.4703	68.8757	67.3329	65.9048	64.6377	63.4686	62.4823	61.4841	60.4079	58.9169	57.092	56.7093	56.7774	57.9029	58.8085	59.4818	60.1142	60.7299	61.2941	61.6965	61.8746	61.885	61.8081	61.1335	60.5952	60.3084	60.2569	60.3255	61.5236	62.7779	64.0946	65.3797	66.6431	68.7659	71.0833	73.7808	76.8645	80.2948	83.8044	87.3449	90.9733	93.7087	95.3933	97.0516	98.7611	101.141	103.417	105.534
3	4	65.5743	68.5654	71.5949	74.7097	77.9638	81.3027	84.7977	88.3242	91.9132	95.6154	99.4088	102.628	105.597	107.817	110.201	112.758	115.113	117.169	117.19	116.771	115.742	113.913	111.75	108.691	105.522	102.153	98.4189	94.4979	89.3532	83.889	77.7042	72.1912	67.1364	62.8222	59.0063	56.7159	55.4698	55.1608	55.8597	56.2081	53.4312	51.1586	49.4792	49.6191	50.4909	53.5087	56.901	60.8747
3	5	72.0039	75.4202	78.2907	79.9508	78.8231	75.9984	73.2739	71.2648	71.4591	70.3511	68.195	64.0228	60.3039	60.1902	60.6132	61.6026	56.0599	49.1821	44.9917	42.7252	43.1275	46.1491	50.1046	53.2002	55.6567	56.9334	58.247	59.5792	62.983	65.7853	66.9241	68.3854	70.0665	75.9085	81.9392	87.0779	90.8824	93.4894	94.1653	94.2836	93.3487	92.3906	91.4053	91.1161	91.0227	90.7954	88.5112	83.0353
3	6	58.421	60.0434	61.3556	61.9798	62.1121	61.945	61.4746	61.3215	62.2242	63.3792	64.7372	65.9811	67.2239	68.5451	69.8284	71.0718	72.1461	72.8887	71.2498	69.5425	67.7401	65.8731	63.9845	62.151	60.664	59.8167	58.8028	57.704	55.5994	54.4147	55.6226	56.7376	57.7893	58.5356	59.502	61.3818	63.5776	66.0572	68.8918	71.8478	75.1055	76.8196	76.7178	76.2711	75.7672	75.7809	75.1963	73.6832
3	7	58.1603	58.5531	58.9176	59.2195	59.4626	59.6698	59.7401	59.7394	59.5489	59.2032	58.7326	59.2296	59.7612	59.7461	59.3066	58.4191	58.7356	59.3806	60.2104	61.1009	62.0756	63.5133	65.1075	66.35	67.3769	68.0059	69.1402	70.5321	70.1806	68.939	65.5729	62.1677	58.7358	55.3186	51.9125	48.5405	46.029	44.2896	43.5676	43.3061	44.5548	47.4262	52.2066	57.3761	62.6308	67.5367	72.2781	76.7646
3	8	62.9101	64.0251	65.1561	66.3227	67.7699	69.3878	70.9623	72.4896	73.8801	75.1303	76.2676	76.912	77.4354	77.7522	77.8938	77.8504	77.8515	77.8698	77.9355	77.6391	76.8402	75.6471	74.3086	72.9866	71.667	70.3518	69.0051	67.6422	66.2693	64.583	62.1065	59.5785	57.0155	54.6387	52.3019	50.0399	48.1197	46.5061	44.9889	43.5474	42.4322	41.5174	40.8385	40.8318	41.0723	41.8426	42.9054	44.422
4	1	44.9482	45.4591	45.9701	46.7786	47.7237	48.6828	49.6656	50.6505	51.6729	52.6953	53.8234	54.9885	56.2353	57.5922	58.976	60.5742	62.1724	63.4709	64.6928	66.182	67.959	69.6868	71.1681	72.6493	73.8595	75.0226	76.0069	76.8371	77.4888	77.5157	77.5427	77.9928	78.486	78.4112	77.946	77.5876	77.5072	77.4268	77.3756	77.3255	77.3671	77.4584	77.6411	78.0063	78.3648	78.3668	78.3688	78.9193
4	2	54.8067	54.3297	53.8528	53.593	53.4331	53.2674	53.092	52.8958	52.3478	51.7998	50.98	50.0651	49.3161	48.7905	48.3044	48.134	47.9636	47.7033	47.4201	47.2059	47.066	47.0276	47.4963	47.9649	49.1471	50.4533	51.9663	53.6576	55.2654	56.5812	57.897	59.145	60.3861	61.7111	63.0939	64.4208	65.6024	66.7839	66.7853	66.7413	64.7188	61.6222	58.8766	56.8329	54.7971	53.1758	51.5546	50.2988
4	3	56.3454	59.7161	63.0868	66.0239	68.7617	71.3802	73.7957	76.1657	77.7619	79.3581	80.5668	81.6397	82.6217	83.4812	84.2392	84.1858	84.1325	84.0357	83.9279	83.5891	83.0018	82.0569	79.3243	76.5917	73.726	70.8372	67.8996	64.9199	61.8636	58.5388	55.214	53.3046	51.5397	53.4673	57.9334	61.97	64.8896	67.8092	70.3025	72.7794	74.4359	75.647	76.7639	77.6923	78.5758	77.0733	75.5709	73.8012
4	4	51.9543	53.8164	55.6785	57.4094	59.0801	61.4361	64.9572	68.4691	71.8229	75.1767	78.1666	81.0291	82.948	83.5953	84.1599	84.0627	83.9655	79.2148	73.2736	67.6453	62.3541	56.7546	49.6133	42.472	39.939	38.2076	36.8374	35.7787	35.4326	37.5805	39.7284	43.7488	47.9603	53.5591	60.1117	65.7293	68.9158	72.1023	71.0987	69.9339	70.3176	71.5419	72.213	71.7778	71.2664	66.7189	62.1714	57.6924
4	5	75.4311	76.9395	78.4478	79.0613	79.2636	79.3891	79.3839	79.4915	81.5155	83.5396	84.0995	84.1469	84.1248	84.009	83.9109	83.9549	83.9988	83.3834	82.5993	81.7059	80.6949	79.6509	78.4418	77.2328	75.8376	74.41	72.207	69.3356	66.4752	63.6535	60.8318	58.3236	55.8474	54.0219	52.6438	51.7643	52.1813	52.5982	52.8742	53.1447	52.7048	51.8793	51.3341	51.3497	51.3612	51.157	50.9529	50.8381
4	6	58.2028	56.2022	54.2016	52.1846	50.16	48.2336	46.4741	44.7664	43.9403	43.1142	43.7347	44.8614	45.7887	46.447	47.0157	46.8679	46.72	48.0484	49.7545	51.7657	54.1053	56.4969	59.1488	61.8007	64.5116	67.2326	69.0318	70.0363	71.0355	72.0161	72.9968	73.9677	74.9377	75.5399	75.8891	76.2699	76.7325	77.1951	77.6241	78.0518	78.408	78.7255	79.6069	81.616	83.6297	85.8916	88.1535	90.4132
5	1	82.0998	83.2803	84.46	85.6293	86.7932	87.9274	89.0745	90.2645	91.4727	92.7215	92.63	90.3941	87.5624	84.0357	82.0487	81.3812	80.8578	80.4242	80.3783	80.5047	81.0274	81.6691	82.8236	84.0715	82.802	81.3228	78.6898	76.195	75.3573	74.5819	74.1492	74.0155	74.8785	75.4551	75.3871	74.8491	73.5591	72.9643	73.1807	73.7865	74.726	77.7871	82.1743	87.1159	92.3041	99.4668	107.222	113.14
5	2	81.1388	83.7393	86.3401	88.9456	91.553	94.171	96.6345	98.5835	100.383	101.845	102.626	102.316	101.972	101.589	101.766	102.424	102.325	101.754	100.13	98.0392	98.7949	100.404	103.004	105.783	103.381	100.547	99.0084	97.6854	98.9527	99.7458	97.931	95.6523	91.8274	88.9015	87.9981	86.7066	84.794	80.1158	72.2113	66.3522	62.2465	60.7381	60.8531	59.7973	58.221	56.446	54.6113	56.8351
5	3	49.9712	52.4884	55.0226	57.7599	60.5804	63.8578	67.1091	70.2732	73.4119	76.4935	78.9292	80.3316	81.5437	82.5339	83.071	83.2199	83.4885	83.8319	84.3415	84.9251	84.5222	83.8235	82.7774	81.6681	82.1775	82.8219	83.8207	84.8784	86.645	87.9362	86.6135	84.8258	81.4884	78.4233	75.9712	73.65	71.5384	69.9098	68.8447	67.1282	64.8535	61.7516	58.1328	55.1976	52.5661	50.3531	48.2656	49.7976
5	4	70.8897	72.7006	74.5355	76.6578	78.7896	80.9744	83.12	85.1352	87.1056	88.9751	89.9468	89.4822	88.8568	88.0438	87.8099	88.0722	86.9183	84.8791	83.3112	81.9527	80.4275	78.8524	76.9005	74.8801	77.4834	80.472	81.4009	82.1835	81.2102	79.9593	77.1817	74.0806	69.9014	66.4339	64.5677	62.3736	59.6549	56.1539	51.7403	49.4206	48.8958	50.9354	54.5776	59.6619	65.3871	71.8211	78.4677	84.1774
5	5	68.6218	67.5682	66.5372	65.7772	65.0784	64.7169	64.3683	64.0624	63.8283	63.7555	63.7826	63.9695	64.1632	64.365	64.3384	64.1161	64.1706	64.3979	64.5433	64.6523	65.7786	67.2102	70.5885	74.3208	78.6945	83.1217	86.7029	90.1516	92.0101	93.6472	94.0669	94.0888	92.7847	90.9778	88.0396	85.0844	82.1019	78.7436	74.9469	70.5575	65.6599	60.258	54.5409	49.8751	45.6766	41.5084	37.3494	38.1163
5	6	80.2722	77.3529	74.5575	73.2506	72.0454	71.4003	70.8178	70.4441	70.3403	70.8436	71.0939	70.9391	70.6981	70.3567	70.8838	72.1553	73.3911	74.6047	75.4027	76.016	76.0068	75.8108	74.7257	73.4788	70.0344	66.4068	63.2286	60.1002	57.5691	55.3788	55.0629	55.2201	56.9545	58.9582	61.5679	63.1626	63.1332	63.3038	63.7075	63.6139	63.0939	62.9219	62.9672	64.4622	66.6014	65.4294	63.2639	64.1231
6	1	48.9948	51.0285	53.0621	54.7937	56.4341	57.852	59.0772	59.7177	59.0167	58.3094	57.5181	56.7269	55.8993	55.0647	53.339	51.0366	48.9297	47.1489	45.4816	44.4954	43.5093	42.3326	41.1372	40.7998	40.8688	41.7778	43.7284	45.7041	47.772	49.8398	51.9729	54.1072	56.3057	58.5257	60.0916	61.0486	62.1676	63.6919	65.2918	68.2277	71.1636	73.4322	75.5556	77.7907	80.1036	82.6745	85.7098	88.7244
6	2	66.5451	67.0977	67.6504	68.8597	70.2675	71.645	72.9961	74.3215	75.588	76.8395	77.8958	78.9521	79.8699	80.7612	81.3689	81.7933	81.8445	81.2739	80.5757	79.1117	77.6476	76.2676	74.8958	74.0757	73.5169	71.3273	67.1153	64.0588	65.2384	66.4179	67.7492	69.0832	70.8136	72.676	71.2653	66.807	63.777	64.3177	64.7794	63.8444	62.9093	63.5932	64.6291	62.7282	58.7805	58.1902	63.643	69.2329
6	3	74.5679	75.7339	76.8999	77.7152	78.4245	78.569	78.2239	77.3774	75.3803	73.5692	74.1748	74.7804	74.7875	74.6799	74.4597	74.1666	74.0018	74.0506	74.2211	75.121	76.0209	77.2861	78.5871	79.6345	80.5619	80.9766	80.7556	80.592	80.6387	80.6854	79.3082	77.9052	76.2445	74.498	73.1465	72.1628	71.5715	71.9615	72.3627	72.9622	73.5616	74.4422	75.384	76.6056	78.0224	80.468	84.7657	89.0437
6	4	66.2382	66.5023	66.7664	67.2324	67.7595	68.2938	68.8344	68.9838	68.2353	67.5143	67.1504	66.7865	66.8715	67.0424	67.8539	69.0801	70.5275	72.3437	74.1381	75.8022	77.4663	78.7208	79.9351	81.6654	83.6401	84.7797	84.8837	84.6213	83.0151	81.4089	81.0518	80.7173	81.2741	82.128	82.8894	83.5648	83.3058	80.711	78.1385	75.9611	73.7836	72.5458	71.5123	71.6794	72.6832	73.2356	72.9753	72.6876
7	1	50.9651	50.6949	50.4283	50.2329	50.0559	50.0574	50.1676	50.9414	51.698	52.3797	53.0525	53.6956	54.3355	54.9673	55.6099	56.2746	56.9405	57.6083	58.27	58.9231	59.439	59.7996	60.2152	60.6827	60.9696	61.1161	60.3222	58.9254	57.3182	55.6009	53.8432	52.0684	50.3401	48.6273	45.8513	42.8045	39.5814	36.3257	33.3309	30.368	31.2623	32.4136	34.2485	36.1017	38.1867	40.2456	41.9972	43.9374
7	2	61.8158	63.6534	65.3928	65.1363	64.8955	64.8063	64.6811	64.3355	63.4967	60.5201	57.77	55.7602	54.4106	54.7482	55.3873	56.6437	58.1248	59.9805	62.172	64.8237	67.3077	69.6016	71.2456	72.2791	72.6634	72.5426	71.3402	69.4444	67.5743	65.7177	61.8607	57.159	53.0496	49.1376	45.6526	42.2764	39.1259	36.0172	32.1278	28.1426	27.033	26.1152	27.5144	28.9898	31.6893	34.4724	38.241	42.2085
7	3	58.771	59.9163	61.0493	61.932	62.8024	63.5527	64.3286	65.2607	65.8634	65.0388	64.1946	63.2863	62.6498	62.7075	62.8498	63.1651	63.8665	65.2114	66.5165	67.767	69.0084	70.2397	71.1035	71.6223	71.9587	72.1533	72.2894	72.3881	71.9317	71.1845	70.0583	68.7721	69.1335	70.0441	71.5495	73.2064	72.9306	72.297	70.8095	69.2172	68.3995	67.6334	65.2894	62.8403	57.9097	53.23	51.5092	50.4401
7	4	52.1307	55.1575	58.1502	60.4483	62.7183	64.7166	66.6977	68.5737	70.4409	72.2704	74.0614	75.727	76.7361	76.0677	75.0294	73.2339	71.4336	69.6253	67.7976	65.9432	63.966	61.8498	59.6095	57.2526	55.2107	53.4136	54.1428	56.4914	59.5733	63.0393	66.4138	69.7498	73.095	76.4434	79.7065	82.948	84.4999	85.7389	83.4454	80.7181	75.8729	70.8865	64.4512	57.9834	51.2183	44.6037	39.7653	35.4398
8	1	63.388	64.8481	66.3082	67.8272	69.3515	70.7958	72.2242	73.3305	74.3295	75.1566	75.8978	77.2787	79.1165	80.9344	82.7323	84.5321	86.3346	88.1698	90.0704	91.8919	93.4765	94.895	95.4832	95.9297	94.8163	93.7028	93.9903	94.2777	93.4249	92.4684	91.445	90.4082	89.6626	89.0141	88.2684	87.4741	85.519	82.7346	78.459	72.6922	67.1298	61.8534	56.7927	52.1631	48.0996	45.7341	43.8939	44.6803
8	2	61.9128	61.7633	61.6138	61.3764	61.1309	61.2358	61.4108	61.6256	61.8537	62.0738	62.29	62.4775	62.6444	62.773	62.8631	63.1108	63.5792	64.4519	66.1329	67.7014	68.9323	69.988	70.1677	70.3783	70.9303	71.4823	73.1767	74.8711	74.6209	74.194	73.4867	72.7233	72.7471	73.0333	72.9549	72.6942	71.2296	68.9051	66.5205	64.0756	62.4839	62.0864	61.0584	58.7695	55.7842	50.7099	46.2858	45.1128
8	3	65.092	67.2128	69.3336	71.5282	73.7295	76.1561	78.6278	81.4445	84.3763	87.1263	89.7855	91.7902	93.3276	94.4503	95.1583	95.6426	95.8137	95.8072	95.4458	94.7028	92.8148	90.8807	88.7152	86.6307	85.4368	84.2429	83.1916	82.1403	80.9157	79.6754	78.5491	77.4457	76.6894	76.0488	77.0269	78.8144	79.8764	80.4202	80.4896	80.0845	79.4068	78.3475	77.8116	78.3223	79.1216	80.7869	82.5118	84.5348
8	4	54.0529	55.8884	57.7239	59.4613	61.1898	59.4565	57.0309	56.8846	57.4979	58.1456	58.8104	57.5186	54.8291	51.959	48.9081	46.7619	45.8819	44.9957	44.0967	43.1854	42.2371	41.717	43.3376	44.9405	46.3487	47.7569	51.0131	54.2694	55.9896	57.5702	59.608	61.7372	63.8486	65.954	67.5508	68.8933	67.7207	64.7518	61.8047	58.8795	54.7324	48.8747	43.0218	37.1784	31.5684	26.6584	22.8587	24.6109
8	5	69.345	68.8924	68.4399	68.1266	67.826	67.8374	67.9112	67.9838	68.056	67.6234	66.9384	66.5314	66.323	66.0725	65.7799	65.3147	64.6079	63.7722	62.6787	61.7011	61.0709	60.8392	62.5996	64.4281	67.0066	69.5852	71.5988	73.6124	75.827	78.0597	80.0347	81.958	81.6516	80.6019	77.6677	73.7914	70.4331	67.4449	65.5746	64.8224	64.764	65.677	67.3757	70.6459	74.2605	78.9086	83.7578	89.613
9	1	46.6093	47.6614	48.7135	49.5091	50.2701	50.9138	51.5209	52.4706	53.6096	54.762	55.9266	56.9645	57.8179	58.3827	58.2348	58.0442	57.6451	57.2578	57.0917	56.9257	57.2347	57.5782	57.8801	58.1726	58.3961	58.5894	58.7798	58.9682	60.0034	62.0423	63.9409	65.5656	67.128	68.4696	69.8021	71.0555	72.3088	73.4499	74.5891	76.0458	77.5522	79.7961	82.2914	84.7302	87.1356	89.5308	91.9163	94.2993
9	2	61.435	62.4638	63.4927	64.5798	65.6747	66.9605	68.3055	69.6261	70.9331	71.9555	72.7207	73.3562	73.8025	74.0253	73.6963	73.4344	73.5014	73.561	73.4807	73.4004	72.7674	72.0943	71.8941	71.8022	72.5005	73.5458	74.0981	74.288	74.0023	73.1531	72.1659	70.9095	69.8557	69.5189	69.1972	69.009	68.8207	67.3908	65.9395	64.714	63.524	62.4735	61.4707	59.955	58.1345	55.1396	51.0095	48.0676
9	3	51.6228	52.2588	52.8949	53.5911	54.2955	55.0461	55.8112	56.6699	57.5803	58.7875	60.2628	61.7566	63.2774	64.7347	66.0349	67.2921	68.3383	69.3742	70.2162	71.0582	72.338	73.6497	74.6006	75.4689	76.042	76.4856	76.7581	76.9049	77.1008	77.3548	77.4545	77.2532	76.8331	75.639	74.3235	71.9359	69.5483	66.0439	62.5202	60.6165	58.967	56.4793	53.7059	50.7918	47.7941	45.0704	42.6114	40.7905
9	4	57.027	58.2691	59.5112	61.3632	63.2973	64.6313	65.7786	66.136	66.0568	66.1486	66.3947	66.5371	66.5282	66.3978	65.9672	65.5505	65.2015	64.8583	64.6244	64.3905	64.9846	65.639	65.9314	66.1407	66.458	66.8226	66.3254	65.1945	64.6605	64.8339	64.6839	63.9034	62.6759	59.8668	57.065	54.3275	51.59	49.6327	47.6888	45.6511	43.5987	41.4592	39.29	37.9826	37.1876	37.3461	38.4262	39.3768
9	5	49.8714	51.6983	53.5253	55.7361	57.9987	59.4911	60.7441	61.0488	60.8296	60.3793	59.7204	59.1409	58.677	58.1747	57.5775	57.1765	57.7366	58.3139	59.2129	60.1119	60.9756	61.8368	62.6449	63.4409	63.2463	62.6168	61.8601	61.0097	59.7588	58.0331	56.1482	53.9529	51.614	48.7675	46.1022	45.0384	43.9745	43.3723	42.778	43.6001	44.6443	45.7309	46.8321	48.8239	51.3453	53.4189	55.0596	56.6476
10	1	59.5427	60.2988	61.0548	61.7508	62.4191	63.0643	63.6701	64.2746	64.855	65.4355	65.9378	66.4127	66.8272	67.1602	67.4746	67.6406	67.8065	67.7456	67.6266	67.7595	68.1638	68.572	69.0003	69.4287	69.4575	69.4169	69.0819	68.4931	67.8805	67.1847	66.4889	65.6623	64.8225	63.6844	62.3412	60.4882	57.3096	54.1309	51.0565	47.986	45.5988	43.5825	42.6303	43.8064	44.979	45.9713	46.9636	47.6897
10	2	45.8707	46.7367	47.6027	48.6639	49.8147	50.9917	52.2132	53.4148	54.2782	55.1417	55.1563	54.8738	54.6232	54.4155	54.2403	54.3251	54.41	54.1344	53.7667	53.0122	51.8412	50.6524	49.3748	48.0971	47.2993	46.5848	46.4619	46.849	47.1763	47.2949	47.4135	47.3609	47.2908	47.6121	48.2025	48.9583	50.1443	51.3303	52.5272	53.7245	54.7482	55.6777	56.6543	57.7252	58.811	60.689	62.5671	64.8381
10	3	53.7639	53.9547	54.1455	54.6704	55.3489	56.0586	56.8213	57.5771	58.2152	58.8534	59.585	60.3492	61.1632	62.0442	62.8796	63.3493	63.8189	63.6396	63.2943	62.8954	62.4389	61.9368	61.2063	60.4757	59.7852	59.1016	57.9602	56.4243	54.7812	52.7629	50.7445	48.3458	45.9082	43.5639	41.2837	39.1182	37.2513	35.3843	32.7527	30.0917	28.6157	27.7828	27.6683	28.9904	30.3068	31.316	32.3253	33.4111
10	4	48.6343	49.7758	50.9173	52.2194	53.5953	54.9722	56.3507	57.7131	58.8031	59.8931	60.2238	60.2887	60.6781	61.5048	62.3625	63.4674	64.5723	65.0423	65.3498	65.5702	65.6966	65.8712	66.2867	66.7021	67.287	67.9013	68.3993	68.7971	69.0553	68.8249	68.5944	68.5044	68.4286	68.3798	68.3494	67.9722	66.6932	65.4143	63.7379	62.0462	60.2119	58.3001	56.4332	54.6563	52.9256	53.6476	54.3696	55.2433
10	5	71.5654	72.6659	73.7663	74.7442	75.6657	76.5483	77.3649	78.1782	78.9354	79.6927	80.2692	80.7825	81.1229	81.2302	81.2767	80.8367	80.3968	79.4108	78.285	76.8615	75.1171	73.3527	71.4878	69.623	68.2757	67.0185	66.0743	65.4	64.5543	63.1094	61.6644	59.5092	57.2816	54.6217	51.6647	48.7554	45.9702	43.185	41.1349	39.113	37.9624	37.2847	37.2337	38.436	39.6618	42.1324	44.6029	47.3601
10	6	57.4194	57.8042	58.1891	58.169	57.9627	57.8592	57.9303	57.9999	58.0448	58.0898	58.4476	58.915	59.6911	60.8834	62.072	63.232	64.392	65.562	66.7344	67.9842	69.3171	70.5348	71.1762	71.8176	71.9792	72.0572	71.8998	71.5395	71.3265	71.6295	71.9324	70.7858	69.4913	69.2229	69.6599	69.9769	69.9819	69.9869	69.8425	69.6923	68.5664	66.9108	64.9263	62.284	59.6286	56.2793	52.9299	49.4557
10	7	53.5603	54.8429	56.1255	57.31	58.4496	59.5326	60.5196	61.5139	62.6322	63.7506	64.6718	65.5241	66.063	66.1795	66.3171	66.6229	66.9287	67.6686	68.5196	69.2226	69.7663	70.3806	71.3475	72.3144	71.9173	71.283	70.3037	69.027	67.5207	65.2112	62.9016	61.5266	60.247	57.8911	54.7952	51.9505	49.7591	47.5677	46.1798	44.8227	44.0724	43.6515	43.3269	43.1949	43.1039	45.1876	47.2713	50.1377
11	1	51.6605	51.3579	51.0554	50.9189	50.9187	50.9555	51.3321	51.7088	52.4736	53.4501	54.41	55.3021	56.1941	56.9143	57.5757	58.1697	58.6017	59.0338	59.4668	59.9001	60.2523	60.479	60.7057	60.5458	60.3617	59.8751	59.0739	58.2668	57.3146	56.3624	55.5178	54.7485	54.0396	53.71	53.3804	53.8273	54.6292	55.72	57.75	59.78	61.6755	63.5341	65.245	66.6608	68.0765	69.8766	71.7279	73.3631
11	2	46.6573	47.7538	48.8504	50.1577	51.6379	53.1331	54.765	56.397	58.0154	59.6265	61.2597	62.9831	64.7066	66.1022	67.3856	68.609	69.6886	70.7682	71.6866	72.5749	73.2312	73.5279	73.8247	74.4548	75.1057	75.5936	75.9119	76.2168	76.1935	76.1703	76.1446	76.1174	75.969	75.059	74.149	73.4193	72.772	72.0703	71.1916	70.313	68.6553	66.7834	64.5993	61.7906	58.9819	55.7198	52.3972	49.398
11	3	51.3117	52.0889	52.8661	53.7097	54.6081	55.5199	56.5558	57.5917	58.6831	59.8047	60.8126	61.3548	61.897	62.5298	63.1935	63.7924	64.2356	64.6787	64.8019	64.8655	64.7572	64.3827	64.0081	63.0851	62.1279	61.158	60.175	59.1948	58.283	57.3712	56.4643	55.5608	54.6026	53.3001	51.9976	50.6518	49.2861	47.9031	46.4637	45.0242	43.4874	41.9239	40.1255	37.8576	35.5897	36.7913	38.4554	40.3017
11	4	59.5996	60.262	60.9245	61.5418	62.122	62.769	64.0298	65.2907	65.3299	64.7028	64.2119	64.2797	64.3475	65.1646	66.238	67.1175	67.5317	67.9459	67.907	67.7837	67.7353	67.8029	67.8704	68.301	68.7542	69.0908	69.306	69.5165	69.6096	69.7028	69.5778	69.3001	69.0169	68.6989	68.381	68.4446	68.6827	68.9358	69.2379	69.54	69.7992	70.0467	70.3763	70.87	71.3637	71.0611	70.6524	69.3326
12	1	47.6061	48.1855	48.765	49.6228	50.759	51.8953	53.2598	54.6244	55.8953	57.0724	58.2496	59.9551	61.6606	63.3029	64.882	66.461	67.4681	68.4751	69.3379	70.0563	70.7747	71.7291	72.6834	73.3169	73.6294	73.942	73.4803	73.0186	72.1601	70.9046	69.6492	67.9176	66.186	63.6905	60.431	57.1715	54.6099	52.0483	49.8398	47.9844	46.1291	44.5168	42.9046	41.6323	40.7	39.7678	41.0096	42.2515
12	2	61.9601	61.5378	61.1154	60.6664	60.1908	59.7152	59.6741	59.6331	59.919	60.5318	61.1447	62.1125	63.0803	64.3083	65.7967	67.285	68.6316	69.9782	71.3396	72.716	74.0923	75.8536	77.6149	78.9236	79.7797	80.6357	80.9771	81.3185	81.4153	81.2675	81.1196	80.534	79.9485	79.1937	78.2697	77.3458	75.2114	73.0771	71.2782	69.8146	68.3511	67.5486	66.7461	66.1181	65.6646	65.2111	65.4679	65.7247
12	3	51.2663	51.2171	51.1678	51.2299	51.4033	51.5767	52.5771	53.5775	54.8388	56.3609	57.8831	59.2606	60.6381	62.0256	63.4232	64.8208	66.0019	67.1829	68.3468	69.4936	70.6403	71.6203	72.6002	73.4511	74.1729	74.8947	75.3834	75.8721	76.0935	76.0476	76.0017	75.6299	75.2581	74.5911	73.6289	72.6667	70.9222	69.1777	67.2006	64.9907	62.7808	62.1029	61.4249	60.4247	59.1023	57.78	55.3065	52.833
12	4	46.0091	46.5606	47.1122	47.6478	48.1676	48.6873	49.2507	49.8141	50.4494	51.1566	51.8639	52.474	53.0841	53.6872	54.2834	54.8796	55.3589	55.8382	56.1444	56.2775	56.4107	56.0812	55.7517	55.3584	54.9014	54.4444	53.9531	53.4618	53.0271	52.6491	52.271	52.5086	52.7461	53.293	54.1492	55.0055	56.2912	57.5769	58.5492	59.2082	59.8671	59.5339	59.2008	58.4748	57.356	56.2372	54.4746	52.7121
12	5	50.5491	51.0834	51.6177	52.2873	53.092	53.8968	54.9522	56.0076	57.1863	58.4881	59.7899	60.9365	62.083	63.2131	64.3268	65.4405	66.4533	67.4662	68.3477	69.098	69.8482	70.5844	71.3206	71.921	72.3856	72.8502	72.817	72.7837	72.1755	70.9921	69.8088	68.3961	66.9835	65.5473	64.0875	62.6278	61.1031	59.5784	57.8552	55.9336	54.0119	51.4912	48.9706	46.772	44.8955	43.019	42.1179	41.2168
12	6	65.9281	64.7152	63.5024	62.4635	61.5985	60.7335	60.2483	59.7632	59.3859	59.1164	58.8469	58.5496	58.2522	57.8895	57.4615	57.0335	57.1105	57.1875	57.3538	57.6094	57.8651	57.9599	58.0547	58.0432	57.9253	57.8074	57.8195	57.8317	57.9524	58.1816	58.4109	58.6678	58.9248	59.3175	59.8461	60.3747	61.1466	61.9184	62.7425	63.6187	64.4949	65.4166	66.3383	67.1775	67.9343	68.691	69.3707	70.0505
13	1	52.3251	52.8294	53.3338	54.1681	55.4072	56.6463	58.6451	60.7302	63.1117	66.0513	68.9908	72.009	75.0475	77.8549	79.9498	82.0447	83.2757	84.1256	84.9904	85.9444	86.8984	88.1476	89.6004	91.029	91.8888	92.7486	92.4505	90.9463	89.4421	86.886	84.2613	82.067	80.5523	79.0377	80.4033	82.3309	85.3822	91.2428	97.1034	102.683	108.16	112.722	113.21	113.698	112.875	111.292	109.564	106.209
13	2	49.596	50.2763	50.9567	51.8583	53.0315	54.2046	55.4173	56.6345	57.8025	58.8783	59.954	61.0064	62.0527	63.1376	64.3414	65.5453	66.9211	68.3727	69.8189	71.2324	72.6458	73.6817	74.4574	75.157	74.0671	72.9773	70.8379	67.6051	64.3723	62.78	61.2946	60.8627	62.0942	63.3256	66.7125	70.52	74.4998	78.9105	83.3212	85.8205	87.6296	89.1074	89.1132	89.1189	87.9462	86.0893	84.0975	80.5893
13	3	47.5453	47.0639	46.5825	46.9756	48.4422	49.9087	51.6277	53.3753	54.852	55.8184	56.7849	57.2575	57.6035	58.0112	58.6089	59.2066	59.8241	60.4504	61.0342	61.3629	61.6917	62.0353	62.3893	62.7398	63.0099	63.2799	63.8615	64.7678	65.6741	67.7124	69.8244	71.9183	73.9836	76.0488	75.944	75.4157	73.8316	69.6076	65.3836	59.6362	53.3386	47.1349	41.3487	35.5625	31.6753	28.8907	26.3187	26.1388
13	4	46.2068	45.5791	44.9514	44.6414	44.7211	44.8008	45.3005	45.8479	46.4396	47.1146	47.7896	48.371	48.9285	49.4191	49.704	49.9889	49.5941	48.8995	48.1754	47.2742	46.3729	45.8236	45.517	45.2564	46.0756	46.8949	47.8188	48.8517	49.8847	51.1246	52.378	53.5926	54.7461	55.8997	56.7842	57.6163	58.3485	58.831	59.3136	59.5039	59.5886	59.6361	59.5185	59.4009	58.5234	57.2047	55.8504	54.0955
14	1	45.0053	45.9957	46.9971	48.131	49.3159	50.7811	52.2625	53.7978	55.1933	56.2741	57.0006	57.1602	57.1418	56.9157	56.86	56.9505	57.0214	57.0802	56.9234	56.6709	56.5137	56.3852	57.0381	57.833	58.4419	59.0353	58.995	58.9491	58.8352	58.9006	59.9511	61.0509	62.3147	63.5251	64.615	65.7866	67.0887	68.4398	69.8481	71.127	72.2951	72.9545	73.296	73.1861	72.8756	72.5622	72.2478	71.9351
14	2	46.4265	45.7972	45.2476	45.6536	46.1035	46.7955	47.5472	48.498	49.5075	50.649	51.8306	53.0764	54.2859	55.4528	55.9961	56.0048	56.0662	56.1607	56.0726	55.9033	55.9952	56.1655	56.4007	56.6478	57.1928	57.7626	58.6965	59.6187	60.4021	61.1786	61.9165	62.4971	62.5533	62.8256	63.5839	64.2066	64.6123	64.9928	65.344	65.8658	66.5339	67.2321	67.949	68.1219	68.053	67.0441	65.7532	65.0562
14	3	44.5706	44.4294	44.2924	44.2047	44.1527	44.2977	44.4456	44.6033	44.8154	45.1501	45.5935	46.2107	47.3927	49.2336	51.1005	52.9897	54.8906	56.7987	58.6867	60.5657	62.0627	63.4449	63.75	63.8592	64.2217	64.6053	64.8163	64.9671	64.3963	64.0077	64.6207	65.2269	65.8107	66.0835	65.6564	65.439	65.5572	66.3827	68.0334	69.2707	70.1538	70.9969	71.8151	72.2226	72.4475	71.6028	70.4373	68.4131
15	1	79.8059	79.9416	80.3015	81.0012	81.4535	81.8227	82.1113	82.0825	81.8328	82.4049	82.7478	82.7073	82.967	83.273	83.4077	83.4049	83.3014	83.0537	82.9573	83.123	83.208	83.2097	82.9156	82.7277	82.6218	82.6114	82.8108	83.3777	83.89	84.3909	84.9254	85.5183	86.1587	86.7982	87.2873	87.4928	87.6354	87.7558	87.8731	87.965	88.0353	87.641	87.1435	86.5033	85.9585	85.4811	85.2233	84.5405
15	2	58.6083	58.7174	58.929	59.2958	59.8675	60.4516	60.8665	61.2591	61.6363	61.9763	61.9885	61.477	61.0537	60.6752	60.3893	60.246	60.2075	60.6317	61.2447	62.156	63.099	64.0855	65.2417	66.5129	67.8729	69.2506	70.5744	71.8008	72.9123	73.6772	72.7395	71.8817	71.0889	70.4335	70.0375	70.1173	69.4792	68.4574	66.6061	64.4177	61.9402	61.1143	60.9899	62.0419	59.9869	57.0812	56.175	56.4743
15	3	54.0538	54.4383	54.8164	55.185	55.5351	55.8981	56.335	56.7435	57.1321	57.2861	57.6071	58.2002	58.9656	59.6247	59.579	59.665	59.8478	60.3037	60.8012	61.3569	62.0722	62.924	64.2191	65.0021	65.3895	65.3022	64.9793	64.2695	63.6057	62.9663	62.3804	61.8885	61.4733	60.862	60.0628	58.9286	56.7546	54.1428	51.0479	47.9411	44.8239	42.9982	41.6678	41.1512	39.6976	38.1268	38.1065	39.9286
15	4	76.5349	77.1231	77.6357	78.0336	78.2391	78.3497	78.2708	78.0826	77.8185	77.2333	76.669	76.1447	75.6633	75.2182	74.8852	74.9496	75.3056	76.0102	76.596	76.9659	77.448	77.9861	78.6364	78.9594	79.0295	79.2769	79.6437	80.211	80.7491	81.2687	81.7387	82.1358	82.4737	82.9954	83.5603	84.1883	84.8982	85.5764	85.8903	86.0309	86.0231	85.1427	84.064	82.7084	81.0237	79.2202	77.4331	75.7117
15	5	70.397	70.4808	70.6363	70.9005	71.1313	71.3881	71.7901	72.1475	72.4739	72.7764	73.0447	73.2586	73.4141	73.5577	73.7217	73.8448	73.9378	74.0581	74.1825	74.3127	74.322	74.2945	74.2639	74.1602	74.0001	73.881	73.77	73.6706	73.7342	73.8575	74.0199	74.1583	74.2772	74.3891	74.4809	74.5353	74.4866	74.3836	74.1659	73.9593	73.7624	73.9104	74.0042	73.9423	73.8304	73.7011	73.5794	73.5057
16	1	50.8961	50.2656	49.6352	49.0047	48.6926	49.2472	49.8511	50.5282	50.8419	50.8426	50.7385	50.5831	50.2172	49.8007	49.2879	48.7792	48.3948	48.0273	47.7237	47.8219	48.689	50.0494	51.9495	53.6361	55.1873	56.4038	57.5064	59.0162	60.5944	63.0421	65.5126	68.1134	70.8444	73.9044	76.9271	79.898	82.6032	85.093	87.5392	89.9654	91.6095	93.0829	94.5564	96.0784	98.0939	100.113	102.146	104.203
16	2	63.4715	65.8571	68.2672	70.8353	73.4402	76.1452	78.1832	79.2331	80.1424	80.9306	81.5671	82.1293	82.7447	83.3728	84.0035	84.6295	85.1948	85.5619	85.1783	85.0206	85.2953	85.8026	86.5644	87.3647	88.1893	89.0479	89.918	90.6996	91.4536	91.1758	91.015	91.5215	92.0808	92.7736	92.6789	91.4875	89.7483	87.5649	84.7108	81.5504	76.4751	70.982	65.9467	60.9343	55.9359	50.7054	44.6701	39.1936
16	3	56.187	56.7564	57.3256	57.8937	58.4614	59.0279	59.7649	60.7545	61.7633	62.7885	63.7858	64.7694	66.2717	67.8989	69.6291	71.3416	72.755	74.1325	75.374	76.5646	77.6577	78.4882	79.0316	79.6905	80.4226	81.2772	82.1735	83.5992	85.089	86.0676	86.9356	87.1734	87.1632	86.5262	85.7004	84.6115	83.1273	81.3226	78.52	75.2618	71.6095	67.8712	64.2145	60.6593	58.0979	55.7055	53.8993	52.6105
16	4	47.8491	48.8603	49.8716	50.8828	51.8099	52.508	53.1244	53.6199	54.148	54.7043	55.4105	56.1899	56.9694	57.7488	58.4712	59.1891	59.8947	60.5665	61.11	61.5794	61.9068	62.2149	62.502	62.1228	61.3211	60.5194	59.7177	59.4801	59.3243	59.5191	59.7533	60.2123	60.896	62.1474	63.3989	64.6503	66.0454	67.5569	69.0981	70.653	72.2782	73.9187	75.6538	77.4	79.2146	81.2478	84.039	86.8301
16	5	58.4421	60.0594	61.5386	62.1268	62.6638	63.0612	63.792	65.0165	66.0502	66.9197	67.1426	67.0493	68.114	69.4575	70.3192	71.1862	72.4973	73.7424	74.7381	75.5196	75.8914	76.1041	76.1429	76.9007	78.1145	78.558	78.7397	78.6529	78.5545	80.0898	81.5087	82.2641	82.8674	83.0864	83.3516	83.6811	84.2434	84.9944	85.244	85.2647	84.3287	83.1839	80.1301	77.4644	79.6537	81.4807	82.0516	81.3343
17	1	66.6914	65.3116	63.9317	64.7426	66.2158	68.4608	71.3747	74.7562	79.2102	83.6475	87.8671	92.0868	96.4369	100.812	103.818	105.937	108.212	110.747	113.121	114.532	115.944	116.612	117.207	117.908	118.659	119.024	118.911	118.628	117.726	116.824	114.629	112.41	109.94	107.385	105.158	103.234	101.61	100.731	99.8822	99.5654	99.2487	99.5597	100.007	100.711	101.594	101.331	99.0038	96.3845
17	2	44.5869	44.5078	44.4288	44.9697	45.6981	46.7573	48.1031	49.5968	51.4298	53.2804	55.3614	57.4424	58.9736	60.3994	61.0426	61.1794	61.2989	61.3894	61.3636	60.6396	59.9157	58.5929	57.2113	56.4369	55.9502	56.8119	59.3454	62.0786	65.5438	69.009	72.7285	76.4526	80.805	85.3667	90.5289	96.2502	101.862	107.2	112.276	112.716	113.156	112.475	111.55	110.146	108.407	105.916	102.07	97.7653
17	3	68.7993	69.8466	70.8939	71.7153	72.4683	73.1128	73.6632	74.1799	74.6192	75.0769	75.7737	76.4706	77.1178	77.7554	78.3506	78.9182	79.4555	79.9423	80.3908	80.6097	80.8285	80.8479	80.8478	80.4213	79.7928	78.701	77.0347	75.7145	75.6629	75.6113	76.9119	78.2372	79.6906	81.1867	82.1467	82.6076	83.0071	83.253	83.4584	82.9459	82.4335	81.068	79.517	77.189	74.3195	70.6969	65.7189	60.8641
17	4	51.718	51.0809	50.4438	49.9053	49.3966	48.9568	48.5768	48.269	48.1268	47.9931	47.9697	47.9463	48.0181	48.1081	48.3378	48.6578	48.9549	49.214	49.4708	49.7147	49.9585	50.3011	50.6534	50.3813	49.8133	49.011	47.9183	46.745	45.2769	43.8087	42.2781	40.7464	39.1625	37.5611	35.8917	34.1589	32.6126	31.5326	30.5087	30.4745	30.4404	31.9577	33.8123	36.9481	40.9769	45.1272	49.4962	53.8509
17	5	98.3262	95.5192	92.7123	90.3588	88.1424	86.4005	85.07	84.1231	84.0565	84.035	84.6007	85.1664	86.7944	88.6258	90.5828	92.6211	94.7111	96.8873	98.9764	100.544	102.111	103.439	104.743	105.78	106.691	107.524	108.26	108.976	109.619	110.263	110.715	111.164	111.311	111.357	111.265	111.043	110.862	110.778	110.65	109.715	108.781	106.798	104.587	100.553	95.2489	89.7867	84.0399	78.4584
18	1	71.7672	72.474	73.1807	73.6281	73.9563	74.6534	75.9773	77.3461	79.476	81.606	83.844	86.1199	88.291	90.3211	92.2789	93.6582	95.0376	95.5873	95.9249	95.692	94.8447	94.029	93.3714	92.7137	92.4292	92.2095	91.9529	91.6645	91.3106	90.7276	90.1446	89.4542	88.7529	89.3236	90.7688	91.5482	90.5966	89.645	86.2741	82.8102	79.3204	75.8166	72.9481	71.3499	69.7261	66.7443	63.7626	62.3427
18	2	70.6627	70.8511	71.0395	71.6472	72.4476	73.3009	74.244	75.1806	76.0051	76.8296	77.537	78.2035	78.816	79.356	79.8898	80.3738	80.8577	81.1878	81.4784	81.7551	82.0166	82.3849	83.2868	84.1888	85.0044	85.805	85.8726	85.3085	84.534	83.023	81.512	79.4525	77.3371	74.8258	72.0424	69.2517	66.4424	63.633	60.7981	57.9621	55.6899	53.7237	52.2669	51.8288	51.4196	52.5432	53.6669	55.9511
18	3	49.6244	50.2145	50.8047	51.0133	51.0466	51.0242	50.9072	50.7935	50.7367	50.6799	50.6649	50.6646	50.6203	50.5166	50.4265	50.4458	50.4651	50.7155	51.025	51.4841	52.1045	52.7457	53.4905	54.2354	54.9673	55.6968	56.4412	57.1985	57.9754	58.8212	59.667	60.576	61.4915	62.3383	63.1379	63.9857	64.9589	65.932	66.4858	67.0235	67.4777	67.8866	68.1696	68.2008	68.1844	65.6469	63.1093	60.6717
19	1	56.2378	57.814	59.3903	60.7597	61.8137	62.8676	63.532	64.0938	64.5431	64.5048	64.4664	64.5938	64.8397	65.0856	65.4677	65.8526	66.3759	67.1298	67.8837	68.0701	68.0877	68.0724	67.8927	67.713	67.3036	66.7154	66.1272	64.7269	63.2912	61.6843	59.7651	57.8459	56.2527	54.7682	53.4048	52.7516	52.0983	51.8028	51.81	51.8173	52.7253	53.6933	54.9632	56.8368	58.7104	60.6325	62.5726	64.5075
19	2	60.8136	62.8101	64.8066	66.7283	68.5357	70.343	71.8757	73.336	74.602	75.0261	75.4502	75.8828	76.3215	76.7602	77.1012	77.4401	77.6384	77.6022	77.566	77.4096	77.2174	76.9843	76.5464	76.1085	75.2751	74.1341	72.9931	70.9301	68.827	65.5844	60.2636	54.9429	51.2388	48.0737	45.6378	47.4728	49.3079	51.1304	52.9425	54.7545	56.19	57.6004	59.5272	62.4865	65.4459	68.786	72.2676	75.4777
19	3	62.3265	62.2625	62.1985	62.1617	62.1667	62.1716	62.4369	62.7707	63.0484	63.0827	63.117	63.4555	64.0114	64.5673	65.5027	66.4461	67.3661	68.2472	69.1282	69.7341	70.2582	70.8034	71.4538	72.1041	72.5842	72.9319	73.2795	72.2921	71.2467	70.0946	68.7479	67.4012	65.0764	62.4256	59.7849	57.2038	54.6227	51.9622	49.2344	46.5067	43.969	41.444	39.4309	38.4418	37.4526	38.2069	39.6086	41.1201
19	4	57.2403	57.6926	58.1449	58.5998	59.0586	59.5174	60.0287	60.5537	61.0295	61.2923	61.5551	62.2705	63.3093	64.348	65.4636	66.5809	67.6707	68.7148	69.7589	70.7163	71.648	72.603	73.6748	74.7465	75.5279	76.0835	76.6391	76.8944	77.1367	77.3668	77.5746	77.7825	77.6741	77.4602	77.2121	76.7629	76.3137	75.8307	75.3193	74.8078	73.6858	72.5231	71.0248	68.8554	66.6861	63.5913	60.1528	56.6254
19	5	55.9743	57.7784	59.5825	60.8248	61.2099	61.5949	61.7654	61.8796	62.083	62.6736	63.2642	63.5429	63.5987	63.6545	63.2828	62.902	62.4983	62.0564	61.6144	61.2303	60.8634	60.3226	58.9121	57.5015	56.3545	55.4123	54.4702	54.23	54.0204	53.7386	53.3253	52.9121	52.2944	51.6085	51.0538	51.2674	51.481	51.3145	50.8265	50.3384	48.8784	47.3537	45.9376	44.7389	43.5401	43.0791	42.8922	42.6232
20	1	51.0721	51.5018	51.9315	52.4322	52.9499	53.7665	54.7711	55.9327	57.3101	58.5535	59.3431	60.1753	62.1772	64.1792	66.1817	68.1843	70.0445	71.8276	73.4543	74.8944	76.2005	77.1316	78.1022	79.5962	81.0903	81.5735	81.9152	81.6301	81.0557	80.4278	79.7445	79.3608	79.6816	79.9308	79.5709	79.211	77.4105	75.4714	72.495	69.1138	65.4296	61.4728	57.6268	54.0023	50.4062	46.9838	43.5615	40.6342
20	2	42.8613	42.4854	42.1094	41.9756	41.8997	42.0209	42.2659	42.6831	43.3368	44.1151	45.3149	46.5423	48.5317	50.5211	51.9298	53.2296	54.5318	55.8352	57.1001	58.319	59.4637	60.4002	61.3017	61.7404	62.179	61.9917	61.7167	61.7461	61.916	61.9524	61.8505	61.6672	61.2924	60.9002	60.3602	59.8203	59.1647	58.498	58.239	58.1392	57.4636	56.2698	54.5965	51.9642	49.2408	45.9596	42.6784	40.0336
20	3	52.1801	52.2092	52.2383	52.3047	52.3799	52.3553	52.2678	52.2868	52.4521	52.6162	52.7759	52.9294	52.9103	52.8911	52.944	53.0105	53.6017	54.4766	55.4694	56.6028	57.6098	58.2633	58.921	59.6355	60.3499	62.0691	63.9289	65.3415	66.5478	67.5731	68.411	69.2093	69.914	70.5409	70.5064	70.4719	69.5483	68.5393	67.2084	65.7519	64.5145	63.4743	62.2716	60.7441	59.3019	58.3826	57.4634	55.3842
20	4	48.3533	48.4841	48.615	48.6511	48.6645	48.8507	49.1456	49.4238	49.679	49.9226	50.1268	50.3491	51.0658	51.7825	52.7471	53.7582	54.7177	55.6493	56.7598	58.0835	59.5617	61.4723	63.3784	65.2253	67.0722	68.4638	69.7916	70.8798	71.8575	73.0354	74.4207	75.3204	75.0777	74.6985	73.1581	71.6177	70.3464	69.1009	67.8953	66.7053	64.478	61.317	58.5831	56.7031	54.8431	53.1046	51.3662	50.8683
20	5	54.0432	54.0538	54.0645	54.177	54.3138	54.4122	54.4863	54.6347	54.8852	55.0897	55.1385	55.1888	55.2826	55.3763	55.475	55.5746	55.7675	56.0107	56.1154	56.055	55.8784	55.3763	54.8934	54.664	54.4346	54.6314	54.8879	55.1182	55.3365	55.5567	55.779	56.1495	56.8689	57.68	59.2705	60.8611	61.8092	62.6955	63.6093	64.5337	65.67	66.997	68.4108	69.9983	71.3686	71.4081	71.4476	71.0564
21	1	51.3433	51.4884	51.6336	51.7787	51.9733	52.2339	52.5687	52.9446	53.3206	53.7158	54.3597	55.0037	55.6477	56.3602	57.1413	58.0204	58.9387	59.857	60.8073	61.9499	63.0926	64.2353	65.4037	66.5914	67.8146	69.0474	70.2802	71.4923	72.628	73.7638	74.8996	75.9771	77.0221	77.9893	78.9436	79.8978	81.01	82.5168	84.0237	85.5305	86.9857	88.4202	89.7875	91.1496	92.5117	94.0153	95.7735	97.5317
21	2	56.3346	55.4703	54.7028	54.2902	53.9067	53.5621	53.3072	53.1022	53.029	52.9779	52.9279	52.7914	52.4388	52.2999	52.3748	52.2544	52.0559	52.3516	52.6326	52.5978	52.5878	52.6224	53.1819	54.1352	55.1456	56.1715	57.1609	58.2244	59.5596	60.9211	62.3177	62.9399	63.1321	63.5092	63.9642	65.0308	66.0892	67.1268	68.2324	69.4061	70.6575	71.9401	72.9176	73.7386	73.7611	74.0519	74.8257	75.462
21	3	57.655	58.1031	58.5906	59.2228	59.8454	60.4552	60.6917	60.7208	60.6291	60.5217	60.4716	60.463	60.5583	61.0006	61.7898	62.4043	62.949	63.4838	64.105	65.2484	66.4225	67.6515	68.8317	69.9753	70.993	71.9763	71.5863	71.3135	71.4708	71.6654	71.9098	71.4401	70.5736	69.3388	68.003	66.1542	64.1147	61.5982	59.8703	58.9309	57.3668	55.5528	53.2716	51	49.0021	47.2778	46.0459	45.3486
21	4	48.7826	48.7423	48.724	48.7861	48.8914	49.0542	49.2889	49.5635	50.2651	51.0667	52.2437	53.2019	53.6129	54.1226	54.7309	55.4416	56.1933	56.7282	57.3271	58.4103	59.6188	61.0527	62.07	62.7748	63.5319	64.3031	65.0243	65.574	65.4954	65.5406	65.7509	65.9939	66.2553	65.7661	65.158	64.6304	64.0799	63.4726	62.4972	61.1539	59.6318	58.0383	56.0823	53.9164	50.6585	47.4628	44.3787	41.3933
21	5	66.489	65.5656	64.6844	63.9576	63.2897	62.7002	62.0716	61.4213	60.6698	59.8965	59.0587	58.205	57.3117	56.361	55.3529	54.3303	53.3021	52.2726	51.2433	50.215	49.2542	48.4148	47.698	47.073	46.7903	46.601	46.9709	47.4141	48.1262	48.9653	49.9737	51.2435	52.6584	54.1503	55.6572	57.1913	58.5	59.2449	60.0713	60.9789	61.9572	62.9637	63.8415	64.6824	65.3619	65.9682	66.4427	66.7319
21	6	49.9378	51.0961	52.2275	53.2602	54.2985	55.3445	56.41	57.4864	58.499	59.4277	59.4036	59.3453	59.2014	59.0475	58.8836	58.7371	58.5975	58.47	58.3269	58.0843	57.9421	57.9808	57.9759	57.9385	57.8383	57.7211	57.8742	57.8445	57.1446	56.4336	55.7079	54.9881	54.2716	53.7139	53.2187	53.1906	53.1786	53.2068	53.4045	53.7717	54.3481	55.0081	56.0074	57.1122	58.694	59.7525	59.8691	60.3441
21	7	41.583	43.0576	44.5387	46.0435	47.4168	48.6146	49.6407	50.5714	51.4974	52.4221	53.3409	53.9715	53.8816	53.6293	53.2145	53.053	52.9928	53.4305	53.8217	53.704	53.8308	54.3979	54.4211	54.0364	52.8982	51.5546	49.5317	47.4623	45.2222	43.2646	41.6837	39.6803	37.4422	35.3711	33.3743	31.9825	30.8122	30.196	29.7362	29.4327	29.466	29.6339	29.5946	29.6073	30.0274	30.772	32.1005	33.6896
[truncated: 78 more columns]

## Sheet: TeTX2.xls
Session	Step	1	2	3	4	5	6	7	8	9	10	11	12	13	14	15	16	17	18	19	20	21	22	23	24	25	26	27	28	29	30	31	32	33	34	35	36	37	38	39	40	41	42	43	44	45	46	47	48
1	1	68.0136	69.016	69.998	70.7352	71.5968	73.1429	75.2415	79.1819	83.2266	87.5062	91.1954	93.94	95.8279	96.7164	97.5187	98.2469	98.5407	98.5629	97.7949	96.6756	94.5378	92.0945	90.8295	89.7788	89.7443	89.7945	90.3836	90.9478	91.2138	91.4712	91.682	91.6606	90.8652	89.8487	88.3346	87.2696	86.9229	87.0804	87.8263	88.8849	90.2116	91.8194	93.6028	91.8879	88.6182	81.7409	73.7812	70.0341
1	2	59.1327	59.1227	59.1166	59.1561	59.2294	59.4885	59.8138	60.3598	60.9834	61.7814	62.4121	62.7752	63.0973	63.3715	63.9395	64.7594	65.9935	67.4865	69.1831	70.9701	72.5635	74.0987	75.1136	76.0338	76.5625	77.0585	77.0038	76.8725	75.8227	74.503	71.6985	68.802	65.5987	62.3648	59.0616	55.6226	51.9662	47.7748	42.9591	37.7127	32.0971	29.0303	27.5566	28.928	31.564	36.4395	41.987	47.9976
1	3	56.9769	57.2219	57.4597	57.6122	57.7817	58.0442	58.3282	58.6836	59.0115	59.2777	59.5753	59.9232	60.5921	61.6355	63.1197	64.982	67.0369	69.2124	71.2273	73.1708	74.5256	75.7038	76.6455	77.5441	78.41	79.2732	79.3937	79.4605	78.883	78.3712	78.2208	78.3319	79.3146	80.5536	82.3693	84.0377	85.4706	86.2019	86.1149	84.8355	82.5342	80.107	77.6012	77.4566	78.3613	79.9491	81.7418	79.0048
1	4	57.4681	58.6677	59.8507	60.8346	61.8048	62.6993	63.6101	64.575	65.9232	68.1339	70.3453	72.5578	74.7184	76.8186	78.8207	80.7388	81.9075	82.6079	83.0545	83.3882	83.4021	83.3199	82.2279	80.9524	79.7153	78.4814	77.4781	76.5002	75.826	75.2418	75.1522	74.9132	74.1761	73.213	71.7416	69.9788	67.7497	65.877	64.4203	63.4657	62.9416	63.5334	64.8227	68.0359	72.1043	76.247	80.412	82.9014
1	5	56.0456	57.829	59.6186	61.4826	63.3478	65.2197	67.1686	69.3743	71.6135	73.9278	76.2342	78.528	80.6224	82.4843	83.9996	85.2178	86.2538	87.1758	87.8772	88.4806	88.7439	88.9053	89.2279	89.5799	90.2653	90.9786	91.9675	92.9043	93.2151	93.6161	94.5129	95.4511	96.5267	97.5046	98.2627	98.7537	98.8173	98.8145	98.7343	98.8135	99.0293	99.3045	99.6167	99.3252	98.7653	97.1351	95.1838	93.2915
2	1	62.9614	63.3587	63.7193	63.6388	63.5119	63.1295	62.717	62.2044	61.7167	61.2851	61.1024	61.318	61.3402	61.1369	60.6995	60.0615	59.2542	58.3409	57.3383	56.2959	55.469	54.7068	55.687	56.9839	59.7155	62.5666	64.788	66.922	68.0075	69.1444	70.5644	72.141	74.2396	76.5886	79.5012	82.6526	86.1863	89.3149	91.9709	93.5394	94.1755	94.5643	94.7984	96.1802	98.072	100.047	102.047	103.637
2	2	61.3954	60.552	59.781	59.8789	60.0883	60.9112	61.8537	63.195	64.6358	66.3005	67.9867	69.7071	71.4118	73.0979	74.9326	76.8948	79.1286	81.5321	83.052	84.179	85.0395	85.82	86.4569	87.0677	87.5805	88.0851	88.5006	88.8941	89.0229	89.0505	88.5219	88.0069	87.5373	87.1745	87.0522	86.747	86.149	85.0121	83.2464	81.4365	79.5889	77.992	76.5519	75.5553	74.7558	72.9789	70.9087	69.3458
2	3	48.0741	48.4592	48.8545	49.3719	49.9156	50.6035	51.3148	52.1047	52.8307	53.4132	54.0188	54.6615	55.4364	56.3655	57.3979	58.5188	59.667	60.8324	61.9764	63.1111	62.771	61.9884	60.7405	59.408	57.9607	56.5039	54.898	53.3872	53.0188	52.722	52.8187	53.0742	53.8592	54.8291	56.2151	57.4683	58.5089	59.4916	60.407	61.6702	63.2318	64.7768	66.3117	67.1545	67.6897	67.1065	66.1878	67.0045
2	4	65.8085	66.7919	67.7216	68.0064	68.2431	68.2151	68.173	68.0841	67.9921	67.8933	67.617	67.0566	66.2655	65.205	63.9836	62.6244	61.2666	59.9098	59.044	58.3966	56.9349	55.2289	53.1112	50.9187	48.8456	46.7824	45.6905	44.6485	44.2042	43.9032	44.3899	45.1373	46.7541	48.7278	51.5043	54.641	58.354	61.9991	65.5649	68.7465	71.5987	74.1172	76.4272	78.5607	80.6156	81.854	82.8474	83.4533
2	5	85.4162	84.4654	83.4544	81.7204	79.9536	78.007	76.0926	74.2852	72.5314	70.898	69.5198	68.5499	67.8556	67.4828	67.2635	67.1756	66.9844	66.7287	65.508	63.8585	61.1122	58.0369	54.5303	50.9453	47.2602	43.5666	39.9766	36.2442	30.8043	25.5262	21.1377	17.1543	14.5211	12.552	12.0772	12.517	14.4204	16.7455	19.5625	22.9411	26.8009	31.3116	36.229	41.8131	47.6936	54.0223	60.4855	66.4802
2	6	58.9526	60.5729	62.1752	63.5605	64.9091	66.0561	67.1356	67.9903	68.6865	69.0261	69.4236	69.9136	70.3894	70.8486	71.1336	71.2691	71.1038	70.7503	70.8312	71.1052	71.5451	72.0349	72.5643	73.1009	73.8794	74.6781	76.2578	77.8448	79.5202	81.1617	82.6167	84.2068	86.2474	88.5385	91.3932	94.082	96.5056	98.5414	100.125	101.656	103.143	104.471	105.699	106.522	107.164	107.244	107.154	106.923
2	7	71.6376	73.163	74.696	76.3208	77.85	78.8535	79.6996	80.0212	80.5154	81.3983	82.4434	83.7482	84.9289	85.9648	86.8028	87.4712	88.0033	88.4504	89.7894	91.5249	92.755	93.8336	95.2675	96.7661	98.5029	100.259	101.263	102.355	104.522	106.52	107.588	108.538	109.098	109.487	109.49	108.446	105.726	101.66	96.0242	91.6131	88.2516	85.1704	82.2642	77.7751	72.5823	70.3286	68.9565	68.5192
3	1	66.8201	67.5182	68.23	69.108	70.0066	71.0184	72.0117	72.9432	73.8279	74.6076	75.3918	76.1831	77.1158	78.2135	78.8686	79.1442	79.3461	79.5018	79.8167	80.2023	80.4476	80.6509	80.2745	79.7927	78.547	77.2375	73.5723	69.9363	66.6516	63.4249	60.5181	57.7469	55.428	53.2281	51.2956	49.4695	47.8139	46.2933	44.9305	44.4934	44.8497	45.964	47.5521	50.1654	53.2343	56.6584	60.1891	62.9504
3	2	69.9365	72.7028	75.412	77.435	79.3558	80.715	81.9464	82.7519	83.7074	85.0001	86.3851	87.918	89.4452	90.966	92.0139	92.6564	93.1131	93.4536	93.7233	93.9615	94.8162	95.8559	97.1244	98.4344	99.9409	101.464	102.737	104.019	105.404	106.809	108.324	109.914	111.753	113.494	115.017	116.31	117.236	117.453	116.844	115.252	112.818	110.331	107.81	105.892	104.242	100.288	95.6416	92.1538
3	3	58.5649	57.5054	56.4741	55.7823	55.1649	54.9564	55.097	56.4015	57.804	59.4272	61.08	62.7802	64.3474	65.7595	66.7297	67.321	68.083	68.9516	70.5287	72.4207	72.2834	71.5373	70.1371	68.618	66.5875	64.5143	64.5078	64.3781	62.7699	61.0156	58.458	56.5138	56.6138	56.9243	57.7085	58.3842	58.8865	58.3808	56.699	56.1907	56.6883	58.2576	60.4968	64.2853	68.7625	70.7155	71.9112	72.7143
3	4	52.7093	53.0182	53.3077	53.3658	53.3922	53.244	53.0852	52.8909	52.6136	52.1495	51.6143	50.9653	50.2356	49.4118	48.5139	47.5523	46.8296	46.256	46.274	46.555	46.9744	47.4353	47.7778	48.0987	48.2322	48.35	48.1622	48.009	48.2707	48.534	48.8059	48.4324	45.9078	43.8791	42.966	42.2914	41.9982	41.405	40.4616	40.7245	42.0213	43.8538	46.0211	48.5073	51.1353	57.2398	64.3871	70.2477
3	5	44.7567	45.5468	46.3391	47.1579	47.9814	48.8304	49.6925	50.5985	51.4531	52.1922	52.8389	53.3377	53.5833	53.5332	53.1458	52.4693	51.6281	50.6841	49.6174	48.4962	47.8163	47.2688	47.1417	47.0911	47.531	48.0119	47.241	46.5096	46.251	46.0578	46.2249	46.4213	46.7156	46.8892	46.7911	46.6146	46.3129	45.999	45.671	45.6512	45.8957	46.4952	47.3166	48.7104	50.3586	53.0358	56.0217	58.7683
3	6	48.0138	49.6562	51.315	53.1719	55.0683	57.1825	59.4551	62.2555	65.2603	68.725	72.0912	75.2996	77.5573	78.7058	80.084	81.6591	83.3612	85.1426	87.0409	88.9913	90.8133	92.5969	92.9919	93.1344	91.4075	89.5248	87.8491	86.1978	84.8403	83.53	82.4798	81.5272	80.8998	79.7719	77.5177	74.9469	71.8693	68.7756	65.6629	63.1573	61.1722	59.7744	58.7438	58.5887	58.8227	59.2776	59.7987	60.0887
4	1	63.5008	64.2443	64.9888	65.7445	66.5022	67.2713	67.9969	68.5775	69.1257	69.6007	70.082	70.5733	71.0993	71.6658	72.2963	72.9815	73.5673	74.091	74.3846	74.5759	74.7246	74.8605	74.9434	75.0167	74.9941	74.9636	74.6263	74.2598	73.5418	72.7553	71.5919	70.2925	68.5399	66.6607	64.4966	62.1523	59.5196	56.3335	52.5018	49.0648	45.9663	43.2679	40.8198	39.0289	37.5302	36.7237	36.1249	36.1249
4	2	53.3659	54.4033	55.4438	56.5209	57.5605	58.3941	59.1588	59.6936	60.1388	60.3822	60.5423	60.5694	60.5694	60.5378	60.5527	60.6073	60.6424	60.6654	60.3021	59.7672	59.8855	60.1997	60.5573	60.9227	61.2584	61.5917	61.7288	61.8458	61.7202	61.5672	61.2631	60.9019	60.3505	59.552	58.1973	56.7122	55.0183	53.2059	51.2551	49.4979	47.9067	46.3544	44.8266	43.1931	41.5127	39.7067	37.863	35.9753
4	3	51.4256	50.9009	50.424	50.5218	50.6589	51.0126	51.3745	51.7637	52.1974	52.7308	53.37	54.1783	55.0639	56.0398	57.0125	57.9825	59.2162	60.6147	62.3833	64.3164	65.9043	67.3886	68.7735	70.1403	71.8284	73.5433	75.1696	76.7425	77.6746	78.4877	78.6459	78.7313	78.574	78.4276	78.3057	78.2454	78.2833	76.5146	72.6379	68.1177	63.0458	58.5493	54.4126	51.1047	48.1651	46.0392	44.1574	43.5003
4	4	69.2759	68.2431	67.2337	66.5056	65.8502	65.5946	65.4187	65.5084	65.5918	65.6609	65.9346	66.5356	67.492	68.863	69.8865	70.6123	71.2514	71.8363	72.211	72.4922	73.2517	74.1548	74.7605	75.3122	76.2405	77.2001	78.2255	79.2081	79.678	80.0694	80.0298	79.9662	79.8223	79.4644	78.6248	77.7254	76.7303	75.2975	73.3541	71.1377	68.6873	65.0578	60.6914	56.6173	52.6732	48.5373	44.3438	41.3764
4	5	71.9418	72.2856	72.6055	72.6389	72.6346	72.4226	72.1474	71.6614	71.1166	70.4396	69.8895	69.5424	69.4794	69.7477	70.0328	70.3325	70.6372	70.945	71.1331	71.2679	71.413	71.5611	71.9569	72.3977	73.022	73.6616	74.2492	74.8142	75.107	75.352	75.3339	75.2791	75.1016	74.8146	74.2811	73.381	71.8946	70.2223	68.333	66.318	64.1952	62.2922	60.5267	58.9783	57.5266	55.886	54.1888	51.5509
4	6	53.2158	51.9511	50.7103	49.7565	48.732	47.3183	45.8275	44.0793	42.4152	40.9401	39.8154	39.2515	39.0857	39.3844	39.8084	40.3397	41.6465	43.4381	46.3347	49.7225	53.3747	57.1062	60.432	63.6841	66.4166	69.1058	71.4473	73.7549	75.6557	77.4454	78.6242	79.6302	80.0603	80.357	80.3539	80.477	80.8019	80.664	79.9861	79.5058	79.1948	79.7668	80.8907	82.8743	85.24	88.0778	91.0573	94.4966
4	7	58.6425	60.1098	61.6103	63.5106	65.3734	67.0299	68.6089	69.9296	71.1903	72.316	73.33	74.1649	74.8093	75.2314	75.5578	75.8021	75.9374	76.0046	76.4087	76.9625	77.7475	78.6019	79.2825	79.9315	80.6351	81.3434	81.4801	81.5688	81.0799	80.5695	79.9406	79.3293	78.7768	78.3009	77.9973	77.7914	77.742	76.84	74.9433	72.7116	70.1926	68.437	67.1587	66.6967	66.5975	66.8082	67.1119	67.2984
5	1	52.0747	53.4303	54.7895	56.1902	57.5729	58.8564	60.0302	60.8386	61.7276	62.7981	63.9276	65.1514	66.4507	67.8378	69.4621	71.2897	72.8749	74.3087	75.5433	76.6894	77.6376	78.5265	78.3539	77.9883	77.4328	76.8615	76.3017	75.7827	75.7524	75.6777	75.3583	74.875	73.8451	72.5238	70.5469	68.3027	65.6308	63.6438	62.4558	61.6219	61.0917	60.2329	59.1686	58.4723	57.9393	58.9247	60.3656	63.763
5	2	42.9741	42.6763	42.3918	42.2682	42.1684	42.1996	42.2661	42.4501	42.7982	43.5155	44.1806	44.7621	45.2567	45.6499	46.4598	47.627	48.7825	49.9308	51.0026	52.0404	52.9101	53.7294	53.8716	53.8907	53.8023	53.705	53.4378	53.1256	52.2732	51.4291	50.6307	49.9025	49.4081	49.0471	48.9859	49.0405	49.2804	49.3622	49.2596	48.9108	48.3509	47.3185	45.9909	45.7815	46.0692	47.04	48.2157	49.9886
5	3	62.2509	63.0361	63.8363	64.815	65.7999	66.8184	67.7763	68.5321	69.2869	70.0395	70.8183	71.639	72.485	73.3603	74.0988	74.7198	75.1522	75.4667	75.6841	75.8584	76.0161	76.1689	76.0073	75.7886	74.9796	74.1215	72.7466	71.364	69.888	68.5389	67.8876	67.376	67.3302	67.4581	67.9768	68.5075	69.0573	69.7341	70.559	71.5377	72.6483	73.992	75.4813	76.8702	78.2145	79.3105	80.3321	81.0335
5	4	56.6568	55.2011	53.7525	52.3879	51.0408	49.79	48.5823	47.5186	46.6158	46.0753	45.6728	45.491	45.4784	45.6633	46.2138	47.0775	48.1699	49.4053	50.7886	52.2375	53.7784	55.3468	56.8829	58.4131	59.8666	61.3137	62.6473	63.9629	65.061	66.0919	66.7529	67.3283	67.6184	67.7943	67.713	67.652	67.6233	67.6921	67.8746	68.1028	68.3699	68.5739	68.7384	68.6463	68.4402	68.6675	69.0248	69.9257
6	1	64.0335	64.5068	64.9815	65.4728	65.9683	66.4867	66.9858	67.4208	67.8282	68.1736	68.4811	68.7279	68.899	68.9818	68.9532	68.829	68.6028	68.3129	68.0084	67.6974	67.1103	66.4404	65.2163	63.8914	62.275	60.6342	58.8382	57.0218	54.9616	52.8605	50.5345	48.2065	45.8714	43.5308	41.178	38.7772	36.2995	34.027	31.9941	30.537	29.5737	29.1401	29.0378	29.3253	29.7862	30.7174	31.7898	33.543
6	2	46.9013	47.2411	47.5633	47.6743	47.8198	48.1549	48.5166	48.9673	49.3571	49.6101	49.7646	49.7617	49.6913	49.5423	49.3063	48.9957	48.6919	48.3923	47.366	46.0166	44.0047	41.794	39.4379	37.0553	34.1848	31.2736	28.6299	26.0521	24.266	22.6273	21.7992	21.2121	21.4284	21.9333	23.0876	24.5086	26.3561	28.6722	31.535	34.6253	37.9106	41.1089	44.2528	47.2446	50.1688	53.0915	56.0137	59.2339
6	3	65.7003	66.2921	66.8481	66.9737	67.1296	67.452	67.8929	68.7286	69.7304	71.1058	72.5453	74.0875	75.4697	76.6653	77.5406	78.1414	78.3159	78.2238	77.417	76.2925	74.648	72.8476	70.9311	68.9934	66.6762	64.3273	62.3524	60.433	59.179	58.1155	58.1002	58.5178	60.3785	62.1072	63.5389	65.1465	67.0356	68.6373	69.9037	71.2991	72.8051	74.1095	75.288	76.3167	77.2788	78.7719	80.4242	83.1586
6	4	69.2595	69.7806	70.281	70.5346	70.7833	71.005	71.2402	71.52	71.8194	72.1625	72.5276	72.928	73.3734	73.8714	74.3601	74.8408	74.7749	74.3673	73.6659	72.8339	71.8662	70.8577	69.3305	67.7089	65.4816	63.2038	60.8277	58.5228	57.0714	55.8463	55.8659	56.0079	56.5584	56.6814	55.8423	56.0403	57.8976	60.3098	63.3694	65.9116	68.0101	69.0981	69.5546	69.529	69.2892	69.789	70.5107	71.5024
6	5	64.7767	65.3955	66.0151	66.6459	67.2665	67.8315	68.3881	68.9164	69.4442	69.971	70.4876	70.9882	71.4364	71.8235	72.1375	72.3888	72.7478	73.1741	73.6892	74.2438	74.7344	75.2057	75.5424	75.8547	76.0287	76.1912	76.2143	76.2134	75.9249	75.5357	74.593	73.4666	71.7275	69.9225	67.9691	66.0678	64.2497	62.6254	61.2271	60.1981	59.4855	59.1386	59.0201	59.3982	59.997	60.6478	61.3141	61.4031
6	6	65.9586	65.3517	64.7563	64.2981	63.8931	63.7814	63.7138	63.7932	63.9131	64.124	64.4114	64.8211	65.3514	66.0224	66.8051	67.6837	68.5938	69.5236	70.3872	71.2214	71.9074	72.5491	72.8245	73.0334	73.5498	74.0918	74.1619	74.1802	73.5765	72.9311	72.0556	71.1492	70.1395	69.3021	68.8521	68.408	67.973	67.6906	67.5862	67.2158	66.6173	65.1082	63.0299	60.5851	57.9774	55.6429	53.3903	51.5595
6	7	74.7025	74.8822	75.0857	75.5735	76.0146	76.1994	76.298	76.1089	75.9286	75.7683	75.8252	76.2297	76.868	77.7791	78.5668	79.2486	80.0375	80.8934	81.863	82.8832	84.1111	85.4013	85.8806	86.2124	86.8315	87.4747	88.1992	88.8863	89.125	89.3165	89.2492	89.2319	89.3817	89.4144	89.1837	88.3671	86.613	85.1121	83.9064	83.327	83.2845	83.4133	83.6491	84.2545	85.0241	86.3798	87.9113	89.2965
7	1	52.3361	53.0738	53.8266	54.7612	55.7241	56.8434	57.9865	59.2092	60.4199	61.6034	62.776	63.9311	65.0936	66.2646	67.2929	68.1991	68.9032	69.4811	69.3508	68.9057	67.7949	66.4842	64.7058	62.8422	60.5415	58.2045	55.8067	53.4083	51.0008	48.6015	46.2474	43.8656	41.3918	38.9782	36.7	34.6632	33.0128	32.2346	32.4739	32.9351	33.5865	34.1405	34.6335	35.3642	36.2005	37.4007	38.71	40.6235
7	2	59.6101	59.8232	60.005	59.8104	59.5553	58.9676	58.28	57.2591	56.2106	55.1002	53.9634	52.7845	51.6033	50.4193	49.0756	47.595	45.9184	44.1193	41.7425	39.1091	36.8111	34.6137	32.6415	30.7102	28.9474	27.1986	25.3803	23.5667	21.808	20.0959	18.639	17.2166	15.9092	14.8843	14.4948	14.9957	16.9212	19.4278	22.6124	26.0369	29.6672	33.4581	37.3495	41.0715	44.7182	48.3754	52.0356	55.7843
7	3	50.9174	51.6844	52.5006	53.9085	55.4082	57.4129	59.4738	61.7222	63.8605	65.7515	67.4923	68.9931	69.9469	70.2625	70.7571	71.4052	72.1157	72.8653	73.1414	73.2072	72.4406	71.4242	69.971	68.4384	67.0865	65.7496	65.9812	66.2614	67.1256	67.9767	68.7555	69.6322	70.8354	72.0088	73.115	73.9767	74.447	74.1538	72.97	71.7892	70.611	70.0013	69.7469	68.7819	67.5011	66.1647	64.8116	63.6392
7	4	60.2506	60.3058	60.3369	60.0797	59.7771	59.2252	58.6272	57.8761	57.1324	56.4053	55.6926	55.0027	54.4003	53.9001	53.5029	53.1939	52.9691	52.797	52.6969	52.6288	52.8577	53.1756	53.6897	54.2395	54.9229	55.6174	55.6508	55.6423	55.1316	54.4813	53.0636	51.5854	49.9059	48.1869	46.379	44.5288	42.611	40.7805	39.0519	37.2997	35.5272	33.6328	31.6622	30.7216	30.2388	30.4697	30.9146	32.3164
8	1	56.0046	56.701	57.384	57.9068	58.392	58.6699	59.0707	59.8813	60.7557	61.7737	62.9082	64.2291	65.6353	67.1409	68.7041	70.3167	72.0179	73.7743	75.5479	77.3291	79.1303	80.9375	82.3965	83.7922	84.9927	86.1769	87.0017	87.7999	88.2796	88.7371	89.0734	89.3868	89.6246	89.7852	89.7719	89.6832	89.4735	89.0232	88.2919	87.6211	87.0021	86.5036	86.0803	85.7529	85.4683	85.3186	85.2095	85.5274
8	2	54.3408	54.2467	54.1843	54.5017	54.9085	55.8069	56.8894	58.5856	60.4118	62.5306	64.9571	67.8763	70.7482	73.5651	76.3337	79.0608	81.5008	83.7614	85.8281	87.8087	89.5631	91.2497	92.4794	93.6261	94.4625	95.2731	95.4854	95.6368	95.0585	94.414	93.4055	92.2083	90.3818	88.6652	87.1956	85.8334	84.6431	84.1311	84.4105	84.5495	84.5683	84.3012	83.8554	83.6306	83.504	83.6113	83.7887	84.6481
8	3	53.5884	55.3189	57.0355	58.5854	60.0962	61.3912	62.7075	64.0946	65.4134	66.5784	67.456	67.8737	68.3958	69.0396	69.7482	70.5125	71.3031	72.11	72.8043	73.4484	73.961	74.4342	74.9849	75.5497	76.3294	77.1271	78.405	79.7081	81.3134	82.9156	84.5001	85.8949	86.6576	87.1065	86.8496	86.2859	85.2311	83.2935	80.3259	77.4581	74.6759	72.118	69.7003	67.5637	65.5519	63.8012	62.1288	61.1809
8	4	63.5777	64.5929	65.5755	66.168	66.6687	66.6646	66.6456	66.5773	66.4904	66.3617	66.1767	65.9016	65.6703	65.4901	65.3345	65.2	65.0375	64.8575	65.0217	65.3387	66.0572	66.8962	66.7006	66.3169	65.878	65.4345	65.1468	64.9625	66.0183	67.1504	68.7024	70.2593	71.8325	73.5284	75.5004	77.5923	79.8763	81.954	83.791	84.6657	84.7155	83.0576	80.3325	78.2297	76.4035	74.5456	72.6783	70.0313
8	5	50.9886	51.5544	52.1256	52.7611	53.4117	54.1455	54.7086	54.7029	54.6448	54.4692	54.2724	54.042	54.0074	54.2013	54.5314	54.9783	55.6824	56.5472	57.3126	58.0337	58.6387	59.2089	60.2839	61.4507	63.072	64.7312	67.312	69.8388	71.7165	73.5019	74.7801	75.5984	74.8835	74.4354	74.5874	75.0004	75.8309	77.028	78.6526	79.9861	81.07	81.615	81.823	81.4771	80.8849	80.7032	80.6446	82.7748
8	6	119.819	119.452	119.085	118.719	118.353	117.988	117.623	117.259	116.935	116.698	116.613	116.769	116.948	117.153	117.369	117.596	117.79	117.964	118.148	118.337	118.539	118.743	118.953	119.163	119.358	119.552	119.708	119.865	120.035	120.206	120.384	120.564	120.756	120.914	120.995	121.042	121.036	121.036	121.043	121.057	121.077	121.109	121.15	121.155	121.144	121.127	121.108	121.1
9	1	50.13	51.0087	51.8751	52.5937	53.2865	53.8374	54.3481	54.7246	55.0594	55.3001	55.4826	55.572	55.4739	55.1572	54.6006	53.8383	52.7451	51.4451	50.8954	50.6792	50.7804	50.9768	51.5626	52.2192	52.994	53.7787	55.0405	56.3569	58.3284	60.4283	63.235	65.9271	68.2369	70.2316	71.5173	72.7075	73.7447	74.8751	76.1144	77.5972	79.2887	80.7218	81.9933	83.3513	84.7478	86.4737	88.2985	91.1265
9	2	47.3016	47.8262	48.3628	49.0445	49.7516	50.5979	51.5208	52.6988	53.9403	55.3249	56.7973	58.4103	59.9366	61.3616	62.7167	64.0118	65.213	66.3556	66.9084	67.1992	67.4383	67.6618	67.8814	68.1003	68.2205	68.3325	68.262	68.1712	67.8384	67.4756	66.9482	66.4042	65.8053	65.1826	64.5061	63.9205	63.4803	63.2497	63.2638	63.6961	64.4869	64.3702	63.6864	63.083	62.5154	62.5898	62.8568	64.4125
9	3	61.2153	61.8473	62.4777	63.0894	63.6978	64.2884	64.8001	65.0494	65.3175	65.6276	65.9683	66.3578	66.8453	67.4471	67.8157	67.9842	67.8079	67.416	67.1809	67.0156	66.4631	65.7946	64.5147	63.1237	62.4253	61.7847	61.0869	60.3734	59.4706	58.8459	59.7509	60.746	62.0416	63.4164	64.9695	66.781	69.006	71.1644	73.2453	75.0719	76.6805	76.2941	74.6607	72.9361	71.1712	70.201	69.4693	70.0343
9	4	59.6071	59.6354	59.6747	59.8454	60.0389	60.3586	60.5654	60.3961	60.1842	59.8767	59.5132	59.0602	58.2534	57.0339	55.5824	53.932	51.9758	49.8285	47.7727	45.7576	43.8981	42.0852	40.4983	38.9525	37.3062	35.6516	34.0763	32.5118	31.0751	29.8198	29.5622	29.3657	29.3735	29.4385	29.6324	29.168	27.6505	26.4886	25.7415	26.0479	27.2571	29.2854	31.8258	34.6676	37.6434	40.9005	44.2421	48.0021
9	5	60.33	61.0215	61.718	62.4735	63.2393	64.0619	64.7538	65.0102	65.2194	65.3224	65.3635	65.3055	65.1535	64.8916	64.4992	63.9949	63.3099	62.5119	61.2883	59.8756	58.2038	56.4543	54.3633	52.2102	50.2743	48.3565	46.6726	45.0133	43.6501	42.3026	41.0419	39.8166	38.7097	37.6756	36.8055	36.1855	35.9658	35.8047	35.7121	35.6413	35.5892	35.8084	36.1971	36.7586	37.3969	38.2963	39.274	41.2064
9	6	51.6163	51.8983	52.1796	52.4523	52.7236	52.9868	53.245	53.4869	53.6536	53.651	53.5406	53.2575	52.996	52.7597	52.5574	52.3844	52.2588	52.1628	51.6526	50.9583	50.1535	49.3156	48.3618	47.3868	46.1847	44.9636	43.6691	42.3688	41.0004	39.6421	38.3393	37.0661	35.8919	34.7799	33.8081	32.8305	31.8437	30.8869	29.9651	29.111	28.315	27.9933	27.9679	28.2626	28.6996	29.6342	30.7181	32.2354
10	1	76.5415	77.4855	78.4245	79.3024	80.1698	80.9785	81.7154	82.2127	82.7063	83.1917	83.6751	84.1554	84.6562	85.181	85.7764	86.4323	87.1886	88.0076	88.8535	89.7113	90.5691	91.427	92.2814	93.1352	92.317	91.3595	90.0703	88.764	87.2518	85.6864	83.8283	81.848	79.4606	76.8221	73.6185	70.6463	68.0443	65.7265	63.7404	62.2752	61.2566	61.0058	61.2349	61.2114	61.0757	59.9722	58.5784	57.3919
10	2	46.1237	47.1612	48.1709	48.8479	49.4668	49.7662	49.9248	49.6144	49.3269	49.0907	48.8938	48.7597	48.6625	48.6084	48.4789	48.2847	47.9786	47.6025	47.3223	47.0847	47.385	47.8466	49.1177	50.536	52.1207	53.7193	55.3949	57.0773	58.8423	60.6209	62.4745	64.3492	66.2948	68.282	70.363	72.0046	72.9431	73.4747	73.5316	72.8886	71.6456	69.9552	67.985	66.0882	64.2239	62.7538	61.4018	60.1683
10	3	62.1114	62.4534	62.7995	63.1957	63.6006	64.0536	64.5197	65.0297	65.5389	66.0463	66.5518	67.0545	67.4337	67.6688	67.9019	68.1333	68.372	68.6152	69.014	69.4818	69.5053	69.3955	68.5872	67.6518	66.2766	64.8648	63.7027	62.5757	61.8702	61.3551	61.8872	62.4494	63.1118	63.7572	64.3646	65.154	66.2346	67.4257	68.7459	70.2298	71.854	72.729	73.1356	72.7243	71.9495	69.6693	66.9374	65.1456
10	4	53.7652	55.8415	57.8955	59.68	61.4176	62.8965	64.4213	66.0989	67.7632	69.3973	71.0101	72.5887	73.7473	74.4158	74.8259	75.0144	74.8644	74.5027	73.8941	73.1758	72.1592	71.0532	69.5229	67.9154	65.4986	63.0144	60.733	58.486	56.6524	55.038	54.6296	54.2462	53.9466	53.6062	53.1738	52.6779	52.0801	51.7923	51.8659	52.6415	54.0186	56.1932	58.8664	60.8294	62.4769	62.0885	61.0893	60.5746
10	5	49.7799	49.2133	48.6509	48.1392	47.6363	47.1821	46.7664	46.4791	46.2233	46.038	45.896	45.8233	45.8449	45.9766	46.1341	46.3138	46.523	46.7508	47.0933	47.4869	47.7663	48.0114	48.0677	48.0895	47.9914	47.8833	47.8291	47.7828	47.8315	47.8922	48.0189	48.0836	47.9413	47.654	47.0403	46.3368	45.4896	44.6677	43.8752	43.1759	42.5564	42.0849	41.7059	41.292	40.8624	40.2779	39.6468	38.0753
11	1	51.7899	51.4135	51.0363	50.6503	50.2643	49.8782	49.5345	49.3318	49.2062	49.2544	49.4074	49.7279	50.4252	51.5622	53.0296	54.7801	56.7778	58.93	61.1495	63.3989	65.405	67.3382	69.0751	70.7764	72.1937	73.5873	74.3879	75.1442	75.3676	75.4193	74.5257	73.5481	72.29	70.9065	69.2407	67.2813	64.852	62.1137	59.0147	55.7718	52.4057	48.9143	45.3447	42.335	39.5741	37.5254	35.6903	34.9994
11	2	72.3075	73.7973	75.2628	76.4379	77.5662	78.4367	79.2235	79.7312	80.2288	80.7038	81.1442	81.5291	81.6115	81.3411	80.9698	80.5118	79.9693	79.3741	78.6946	77.9777	77.4805	77.0491	76.7715	76.5218	76.413	76.316	75.6616	74.9643	73.753	72.3726	70.0624	67.8419	65.9207	64.2079	62.9641	62.2823	62.4996	63.1843	64.4146	65.8201	67.376	69.0176	70.7129	72.3263	73.9032	75.8261	77.8527	80.5784
11	3	56.2985	56.2522	56.2026	56.1146	56.029	55.9573	56.1496	57.2216	58.4001	59.818	61.3379	63.0211	64.7157	66.4236	68.0707	69.6658	71.2194	72.747	74.2899	75.8397	77.1154	78.3089	79.2279	80.0969	80.3838	80.6221	80.911	81.2017	81.5133	81.8257	82.1424	82.2498	81.6598	80.9519	79.9787	78.9222	77.7326	75.9499	73.4753	70.8268	68.0291	65.2411	62.4592	59.5019	56.4666	53.8492	51.3571	49.7402
11	4	60.2084	60.2394	60.309	60.8423	61.4521	62.4827	63.6995	65.5373	67.2752	68.7884	70.1813	71.3817	72.2762	72.8139	73.211	73.4876	73.6585	73.7633	73.8359	73.8941	73.5104	72.9941	72.3197	71.6165	71.3717	71.165	70.147	69.0952	67.6379	66.1287	64.3345	62.3908	59.9486	57.4922	55.0037	52.6895	50.6538	48.1285	45.032	41.8772	38.6724	35.6846	32.8323	30.8676	29.2974	28.4667	27.858	28.3138
11	5	35.1539	34.604	34.0726	33.7633	33.49	33.4139	33.403	33.6097	33.7935	33.9258	34.0427	34.1347	34.3017	34.556	34.9784	35.5446	36.2579	37.0631	38.0548	39.1294	40.2394	41.36	42.5186	43.6842	44.9371	46.1973	47.6171	49.0396	50.4945	51.9327	53.2793	54.4785	55.1867	55.8101	56.2427	56.6107	56.8756	56.9665	56.8546	56.8164	56.8414	57.1748	57.701	58.2593	58.8318	59.7586	60.7916	62.4937
11	6	59.5668	60.5488	61.5079	62.1924	62.8407	63.2901	63.9161	65.1311	66.3795	67.7027	69.0638	70.4855	71.9816	73.5646	74.9963	76.2983	77.4822	78.5923	79.6369	80.6523	81.4593	82.2038	82.9329	83.6592	84.8924	86.1678	87.2019	88.2209	89.0578	89.8444	90.3549	90.6531	90.2438	89.6429	88.6109	87.2545	85.3792	83.7865	82.5236	81.4053	80.4112	79.5639	78.8083	77.2471	75.3277	72.6576	69.7623	65.7478
[truncated: 78 more columns]

## Sheet: TeTX3.xls
Session	Step	1	2	3	4	5	6	7	8	9	10	11	12	13	14	15	16	17	18	19	20	21	22	23	24	25	26	27	28	29	30	31	32	33	34	35	36	37	38	39	40	41	42	43	44	45	46	47	48
1	1	37.5743	38.7716	40.0015	41.441	42.9782	44.7818	46.4771	48.0117	49.632	51.3261	53.2727	55.3426	57.1418	58.8758	60.3556	61.816	63.2368	64.6894	66.2623	67.5961	68.4725	69.2755	69.9982	70.7962	71.642	72.4821	73.3202	73.7516	74.1144	73.5916	73.1173	72.9197	72.8178	72.9575	72.5831	71.4928	70.6161	69.9128	70.2224	70.9944	72.4031	73.9506	75.3473	76.6551	77.1323	76.298	70.9172	68.2746
1	2	65.9354	66.372	66.7468	66.7231	66.6734	66.5534	66.5146	66.5962	66.8923	67.3732	68.1616	69.1003	70.1481	71.2222	71.514	71.7681	72.169	72.4735	72.4126	72.0846	71.2456	70.1623	68.8116	68.0439	67.6459	66.5753	65.2761	62.128	58.7888	59.3822	59.9931	60.7042	61.1023	60.71	60.2953	59.8494	58.5385	56.5262	56.7055	57.8854	59.9746	62.2621	62.0789	61.8344	62.1437	63.0239	65.8832	69.5214
1	3	57.5023	59.3109	61.0999	62.7617	64.3933	65.9428	67.4965	69.0565	70.6509	72.2748	73.918	75.5707	77.1722	78.7614	80.1919	81.62	83.1415	84.7199	86.5137	88.4422	90.6285	92.5645	94.2268	95.6774	96.9939	98.3298	99.6723	100.989	102.298	103.296	104.18	104.42	104.252	103.055	100.239	95.1685	89.8427	84.3096	79.3244	74.5893	71.1292	67.9473	65.937	63.9487	61.6268	59.4062	57.5369	55.9777
1	4	68.9605	70.2381	71.5174	72.8082	74.0996	75.3924	76.6646	77.9063	79.0781	80.1896	81.1777	82.1054	82.8541	83.5597	83.9582	84.3211	84.4839	84.6474	84.8131	85.0061	85.251	85.6978	86.3653	87.0084	87.636	87.863	87.9537	86.9198	85.6949	81.9235	78.128	74.1943	70.2287	66.1829	62.1347	58.0834	54.5107	51.3262	48.5998	46.0825	43.7966	41.5611	40.2894	39.3005	40.7269	42.5955	45.9973	50.2578
1	5	46.2793	46.7341	47.2821	48.431	49.5683	50.6737	51.7412	52.7524	53.786	54.8391	55.9331	57.0471	58.1621	59.2772	60.4884	61.5977	61.3693	61.3128	61.9071	62.4863	63.0365	63.2269	63.0236	62.1177	60.7661	58.5567	56.0557	54.2373	52.5833	55.6774	58.8211	62.2478	65.7239	69.3246	73.0871	77.075	81.3261	85.7907	90.2279	94.6527	97.1371	99.198	98.0561	96.7052	94.7569	93.1303	92.6189	92.6307
1	6	60.3553	60.4789	60.6025	60.726	60.8096	60.7845	60.7352	60.6504	60.6589	60.7478	60.9837	61.2913	61.5475	61.7913	61.691	61.5651	61.394	61.2069	60.9587	60.7046	60.4389	60.092	59.6565	59.1478	58.5926	57.9994	57.3934	56.7477	56.0963	55.4238	54.7401	53.9928	53.2383	52.4654	51.9961	51.9496	52.1131	52.4468	53.0333	53.7351	54.6836	55.686	56.9321	58.222	59.8414	61.508	63.338	65.3103
2	1	53.8159	54.3175	54.8426	55.5192	56.2674	57.2106	58.2788	59.532	60.9348	62.4663	64.024	65.5944	67.0425	68.4611	70.235	72.0582	74.2128	76.379	78.5888	80.6829	82.5559	84.2773	85.8331	87.2158	88.4888	89.5761	90.6002	91.4687	92.3156	93.1396	94.0163	95.1942	96.3407	97.4081	98.3896	99.2514	99.9499	100.516	100.331	99.8021	98.2328	96.4363	93.6058	90.6236	86.5903	82.3879	77.5993	73.1652
2	2	65.2235	65.7518	66.296	66.9431	67.6399	68.4723	69.4103	70.5048	71.6378	72.804	73.929	75.0339	76.1895	77.3572	78.6538	79.9788	81.554	83.0505	84.2493	85.3587	86.2968	87.271	88.2846	89.6659	91.2805	93.3401	95.551	97.4138	99.1998	99.0332	98.5696	96.4129	93.7561	89.8359	85.8297	81.7037	77.1247	72.1783	66.7857	61.1894	55.7652	50.3786	46.1121	42.0671	39.7406	38.041	38.5148	39.9425
2	3	40.7811	40.8212	40.8858	41.108	41.3553	41.6714	41.9804	42.2791	42.4544	42.5235	42.2626	41.8403	41.0539	40.1798	39.6574	39.187	39.0856	38.9984	38.9654	38.9518	38.9758	39.2039	39.6554	40.3591	41.2227	42.3364	43.5352	45.2284	47.0024	49.6942	52.3595	54.8741	57.5612	60.6842	64.0635	67.8001	71.8369	76.1171	80.5535	85.0612	89.369	93.6332	97.4346	101.184	104.628	107.984	111.038	113.728
2	4	64.0921	64.7008	65.4363	66.9894	68.8072	71.3451	73.9585	76.6837	79.0003	80.965	82.3988	83.5729	84.6762	85.7624	86.3096	86.6844	85.3466	83.7935	81.4254	79.1943	77.2256	75.4089	73.7586	72.3164	71.0061	70.1374	69.4187	69.6331	69.9978	71.9364	74.0456	77.1275	80.6655	85.3554	89.915	94.293	98.4188	102.34	103.856	104.275	101.171	97.298	89.8646	81.9818	71.2253	61.0554	52.9186	46.1007
2	5	95.7494	97.5126	99.1868	100.287	101.201	101.609	101.863	101.887	101.893	101.883	101.982	102.134	102.348	102.578	102.507	102.365	101.574	100.604	98.9586	96.9765	94.3495	91.5728	88.6325	85.6752	82.7071	79.6348	76.5271	73.2616	69.9784	66.9437	63.9754	61.3849	59.1335	57.7389	56.7155	56.2091	56.3717	57.0767	58.0707	59.1967	60.5238	61.8949	63.981	66.1968	69.3901	72.7585	76.734	80.6964
2	6	70.9965	69.8646	68.7325	67.5987	66.4637	65.3254	64.1963	63.0807	61.9829	60.9006	59.8384	58.7861	57.7532	56.7249	55.7083	54.6964	53.7334	52.821	52.1005	51.5359	51.2696	51.1918	51.3199	51.6321	52.0611	53.0717	54.2799	56.4766	58.8096	61.2823	63.7011	65.8133	67.9299	70.0581	72.1959	74.3471	76.5406	78.7686	81.0401	83.3316	85.4613	87.5557	89.2653	90.9155	92.1446	93.1084	93.152	93.1747
2	7	52.0346	51.1979	50.5743	51.3243	52.2591	53.6969	55.3101	57.1833	59.2637	61.5226	63.9787	66.5312	69.0878	71.6454	73.6646	75.5569	76.3007	77.0026	77.5458	78.3036	79.4717	80.9022	82.6199	84.6297	86.8247	88.749	90.5811	90.7562	90.6633	87.7151	84.4441	79.3329	74.7625	71.5584	69.4907	69.006	68.5387	68.0856	68.5654	69.4712	72.587	76.185	82.1553	88.2606	94.6079	99.6957	100.418	101.313
3	1	47.3866	47.8438	48.3256	48.9654	49.6567	50.488	51.6175	53.1887	54.7501	56.3031	57.8357	59.3583	60.633	61.8479	63.0536	64.2569	65.4372	66.5681	67.512	68.1475	68.1931	67.9006	67.2383	66.2547	65.0672	63.7062	62.2863	60.8179	59.3548	58.6796	58.0817	57.9248	57.9089	58.2491	59.0851	60.6116	62.4683	64.5928	66.9892	69.5097	72.3247	75.2039	78.2459	81.2985	84.3814	87.4105	90.2531	92.7954
3	2	61.2632	62.78	64.3267	66.0657	67.86	69.8049	71.6322	73.2852	74.8232	76.2621	77.5757	78.828	80.0942	81.3638	82.5677	83.7598	84.8554	85.8094	86.2276	86.6078	86.9154	87.199	87.4563	87.9048	88.4746	89.0202	89.5575	90.067	90.5715	90.997	91.4601	92.1373	92.8607	93.7009	94.5683	95.4737	96.3576	97.2241	97.9764	98.6765	98.731	98.6446	94.8429	90.7644	85.6404	81.3412	79.901	78.6127
3	3	53.5233	53.602	53.7484	54.3308	55.0401	56.0949	56.9809	57.617	57.8848	57.8354	57.3854	56.7396	56.1521	55.5786	55.4139	55.3038	55.5497	55.9042	56.6695	57.5049	58.4744	59.5355	60.6969	62.1257	63.7241	65.5848	67.5345	69.6709	71.8299	73.813	75.673	76.8312	77.8108	78.3394	78.5182	78.2097	77.9281	77.6683	77.3874	77.0968	76.5494	75.9461	75.7601	75.6272	75.8352	76.2047	77.1339	78.1991
3	4	59.1268	61.3497	63.53	65.4357	67.2499	68.8147	69.7119	69.6202	69.3686	68.9792	68.3932	67.711	66.4654	65.0841	63.0374	60.9034	58.2123	55.4164	52.2238	49.0662	45.9757	42.9483	39.9897	37.3907	35.0195	34.4904	34.5875	36.3056	38.2668	41.7672	45.3302	49.2501	53.1881	57.172	60.6379	63.3825	66.735	70.5804	74.556	78.5911	80.765	82.5329	83.5686	84.5385	85.189	85.8731	86.6736	87.6777
3	5	53.2535	53.026	52.8766	53.2307	53.7387	54.6656	55.8842	57.5347	59.3925	61.4286	63.652	65.9668	67.2646	68.3176	70.4253	72.6597	75.635	78.328	79.9516	81.481	82.8301	84.0895	85.2508	86.4928	87.786	89.5904	91.5687	93.74	95.9092	96.2081	96.2466	94.8003	93.0199	90.3955	87.4495	84.0554	79.8814	75.075	69.6254	63.882	57.4356	50.8357	46.2812	42.0407	40.0173	39.4066	43.6938	47.7627
3	6	63.4648	64.8296	66.2108	67.6981	69.2192	70.8322	72.5988	74.5929	76.6256	78.6916	80.7914	82.9078	84.8093	86.659	88.3303	89.9768	91.4557	92.8494	93.9203	94.8918	95.6732	96.3369	96.8718	97.1876	97.3645	97.0903	96.6627	95.6934	94.6252	91.8839	89.2711	87.3908	85.6201	84.1266	82.264	79.8872	77.5728	75.3089	73.3204	71.4577	71.1054	71.0826	72.177	73.3777	75.128	76.8976	78.7347	80.5872
3	7	53.712	55.2253	56.7386	58.2526	59.7649	61.2726	62.6579	63.862	64.9539	65.9491	66.8145	67.6164	68.2324	68.8036	67.2014	65.3269	61.7865	58.3894	55.5345	53.0204	51.1583	49.7252	48.7613	48.88	49.6851	51.119	52.7666	54.9576	57.2289	59.9371	62.8801	67.1614	71.6825	76.8097	81.64	86.0571	89.6529	92.5828	94.7427	96.551	97.017	97.1902	96.5226	95.7846	94.7317	93.7764	93.1592	92.677
4	1	58.4988	59.5008	60.5042	61.5172	62.5255	63.5212	64.4793	65.3817	66.4295	67.6027	68.9143	70.2936	71.8347	73.4146	74.9687	76.5084	77.8915	79.252	80.5268	81.7938	83.0461	84.5875	86.445	88.4662	90.5911	92.8585	95.1745	97.5523	99.9312	101.836	103.66	105.026	106.158	106.699	106.726	106.037	104.636	102.66	99.6727	96.2247	90.3357	83.9141	76.4893	69.015	61.5154	54.3156	48.1549	42.4608
4	2	65.1208	67.7251	70.3718	73.2927	76.1885	79.016	81.3832	83.0681	84.5287	85.7961	86.6904	87.4024	87.6225	87.7242	89.2546	90.8899	92.7013	94.5196	96.3637	98.1136	99.6833	101.058	102.221	103.174	103.995	104.463	104.811	102.316	99.4226	95.69	91.8428	87.3431	82.5882	77.189	71.5174	65.4666	59.905	54.7402	50.5352	46.7684	45.7028	45.2265	44.8156	44.4442	44.4427	44.6655	45.6661	47.3369
4	3	50.3632	49.9409	49.5378	49.2583	49.0527	49.0479	49.3204	50.0035	51.1141	52.5929	54.308	56.1388	58.1547	60.2152	62.0174	63.7982	65.5168	67.2126	68.8226	70.3538	71.7343	72.8924	73.8072	74.3685	74.7056	74.5763	74.2884	73.9609	73.6218	72.8637	72.0651	71.0364	69.9759	68.8351	67.7787	66.8399	65.5746	64.0447	62.0916	59.9452	59.3112	59.0072	59.1423	59.3393	59.9565	60.7133	61.9541	63.6187
4	4	59.7125	59.4527	59.283	59.6935	60.2618	61.2599	62.4852	64.0471	65.6805	67.3756	68.6911	69.8212	70.2597	70.5317	69.7426	68.8653	67.7288	66.6912	66.0277	66.1043	67.5968	68.2154	67.8784	67.1406	66.1487	64.8807	63.519	62.1906	60.8846	60.7581	60.7803	61.6492	62.8062	64.691	66.4822	68.143	69.1694	69.6814	69.3578	68.6526	69.119	69.841	71.5093	73.2885	75.7442	78.3491	81.4714	84.265
4	5	78.2675	75.9473	73.6485	71.4866	69.3642	67.3493	65.4006	63.55	61.7488	59.9901	58.2035	56.4033	54.5416	52.665	51.2936	50.0052	49.3476	48.832	48.8538	49.188	50.1195	51.3586	52.9342	54.8229	56.9102	59.424	62.0828	66.3474	70.8223	74.8026	78.72	82.2787	85.7129	88.8326	91.7284	94.3121	96.8675	99.4	101.95	104.508	106.798	109.028	110.95	112.813	114.218	115.419	115.909	116.559
5	1	59.7659	61.4786	63.256	65.4499	67.7242	70.2174	72.6863	75.1192	77.1844	78.933	80.3933	81.7127	82.7303	83.6753	84.8585	86.0671	87.4023	88.7215	89.9804	91.0566	91.783	92.5126	93.2456	94.0013	94.7713	95.5676	96.3728	96.9613	97.5106	97.4122	97.1852	96.2255	94.8399	92.3785	88.9353	84.1247	79.3813	74.6925	70.4308	66.364	62.347	58.341	55.3862	52.5631	50.5771	48.8138	47.822	47.2121
5	2	67.8933	69.76	71.5644	72.9673	74.2946	75.4163	76.5725	77.7799	78.9979	80.2251	81.4344	82.635	83.7974	84.9505	85.9363	86.8885	87.5576	88.1569	88.4922	88.654	88.4841	87.452	85.4771	83.2406	80.8384	78.3374	75.803	72.3174	68.7067	65.3541	62.0434	58.9721	56.0181	53.3603	51.044	49.2034	48.0952	47.5807	48.0081	48.8656	49.3494	49.7517	51.8351	54.0454	56.7452	59.2387	61.0168	63.1927
5	3	47.6185	48.1601	48.7379	49.549	50.4632	51.6579	53.1695	55.1507	57.112	59.0562	60.8533	62.5783	64.0594	65.4818	66.5629	67.6079	68.476	69.3109	70.0207	70.6802	71.2435	71.2959	70.7894	70.2503	69.6906	69.2988	68.964	69.0013	69.0969	69.7142	70.4228	71.6518	73.1542	75.3471	77.9388	81.0859	84.3263	87.6425	90.9211	94.1826	96.6808	99.0125	99.6848	100.162	99.4443	98.4596	96.5485	93.783
5	4	57.2476	56.1927	55.1769	54.4134	53.7176	53.2061	52.788	52.5082	52.2382	51.9765	51.8287	51.7366	51.8356	51.9806	52.3651	52.7716	53.2613	53.7471	54.2176	54.6035	54.8276	55.2743	55.9646	56.8063	57.7438	58.8373	59.9838	61.3501	62.74	63.7208	64.6424	65.227	65.6683	65.7476	65.889	66.1169	66.6913	67.5466	68.8598	70.3819	71.3522	72.2021	72.9141	73.6113	74.2237	74.8234	75.3793	76.0083
5	5	49.4473	49.8552	50.2967	50.9546	51.6635	52.5111	53.3983	54.3442	55.2177	56.0288	56.9585	57.9461	59.16	60.4284	61.2664	62.0679	62.7571	63.4348	64.0691	64.7244	65.4195	66.16	66.9501	67.8443	68.8044	69.9097	71.0642	72.2216	73.3761	74.3151	75.1879	75.6834	75.9037	75.4288	74.9977	74.6277	74.1382	73.5518	72.7263	71.7915	69.9754	67.9671	64.2457	60.4207	56.3594	52.682	50.3359	48.687
5	6	54.7131	54.7175	54.7059	54.5921	54.5298	54.608	55.0988	56.2009	57.6688	59.4517	61.1185	62.7285	63.9431	65.0624	64.9113	64.6613	64.1851	63.6402	62.8351	61.8197	60.4016	58.4228	55.8304	53.6027	51.6062	50.3969	49.4553	48.2483	47.0143	46.3793	45.8269	45.7453	45.8508	46.429	47.1661	48.1245	49.053	49.9573	50.824	51.6736	53.5787	55.7141	57.0769	58.3455	59.0263	59.5617	59.5929	60.2026
6	1	56.8988	57.1802	57.4936	58.0137	58.6451	59.579	60.3238	60.7883	61.1823	61.5156	62.1031	62.815	63.6801	64.582	65.691	66.8829	68.9418	70.9738	72.9043	74.3801	74.9859	75.1527	74.8392	74.0855	73.0527	72.6543	72.4715	72.6446	72.8782	73.9139	74.8726	75.3913	75.8451	76.1344	77.0702	78.9063	80.947	83.1535	85.7574	88.5428	90.0995	91.3881	92.0894	92.6779	92.4004	92.2131	92.338	92.6143
6	2	55.2795	54.1992	53.2002	52.7257	52.3825	52.3972	52.5054	52.7521	53.5368	54.7848	56.5839	58.6525	61.5524	64.6524	68.1835	71.7281	75.1025	78.4086	81.4565	84.261	86.5999	88.3743	89.5315	90.2388	90.6609	91.3259	92.0735	92.7069	93.3242	93.8985	94.4731	95.0491	95.7881	96.9389	98.3515	100.129	102.232	104.6	106.286	107.662	109.09	110.53	111.603	112.498	111.766	110.736	108.67	106.338
6	3	62.4285	62.8039	63.2639	64.2691	65.3945	66.8475	68.2576	69.6043	70.9449	72.2802	73.644	75.0217	76.4881	77.9758	78.6837	79.3203	79.6885	80.0076	80.1412	79.8712	78.8291	77.7931	76.7637	75.7934	74.8605	74.2479	73.7441	74.4687	75.3624	76.4251	77.3903	77.799	78.1994	78.579	79.0614	79.6868	80.4603	81.3538	82.011	82.5605	82.3796	82.0394	81.4985	81.0776	81.9716	83.0448	84.7391	86.3226
6	4	68.2365	70.0543	71.7676	72.807	73.6734	74.0688	74.3089	74.319	74.7149	75.4429	76.1557	76.8611	77.0017	77.0065	77.1777	77.4156	78.3477	79.4683	81.3027	83.2246	85.3138	86.7629	87.5117	87.8538	87.938	88.9131	90.191	90.1067	89.8267	88.8135	87.7322	86.2627	83.666	78.2217	73.4606	69.651	67.1902	65.8232	65.1859	64.8817	65.9226	67.2569	69.4381	71.6098	73.2804	75.4872	79.5531	83.6133
6	5	44.8703	45.4447	46.0945	47.2304	48.506	50.1622	51.829	53.5117	55.2326	56.9863	58.6571	60.2874	62.5581	64.9831	67.8298	70.5261	71.0256	71.5882	72.3899	73.1447	73.8099	73.7314	72.8395	71.9932	71.1757	71.3595	71.8836	70.7768	69.4293	66.7864	64.3996	63.4725	62.2147	60.1213	58.4732	57.4453	57.0693	57.2219	58.1339	59.3925	59.7224	59.8496	61.6337	63.4022	64.2224	65.146	66.4283	68.0142
6	6	54.652	55.9309	57.2202	58.577	59.9603	61.4156	62.8381	64.2122	65.6304	67.0867	68.6722	70.3208	71.9424	73.5575	75.1325	76.6958	78.1459	79.4573	80.2438	80.9278	81.416	82.1706	83.2164	83.8109	84.1191	83.9487	83.6156	82.6621	81.6143	79.8851	78.0161	75.3497	72.5955	69.6194	66.4704	63.0803	59.2266	54.997	51.4905	48.3141	46.0479	43.9804	45.0338	46.3189	48.4709	50.7356	53.3905	55.7519
6	7	68.355	67.8113	67.2775	66.8073	66.3336	65.8505	65.2741	64.5593	63.8641	63.1857	62.6829	62.2658	62.148	62.1023	62.8135	63.5889	64.5653	65.5989	66.8488	68.264	69.9954	71.9765	74.231	76.4885	78.7479	80.889	82.9899	84.4745	85.8787	87.4889	89.084	90.5932	91.919	92.7812	93.4995	94.0171	94.323	94.4571	94.3943	94.2417	95.2826	96.584	97.4761	98.3628	99.3885	100.635	102.649	104.821
7	1	46.8266	47.6501	48.4836	49.3819	50.2736	51.1473	51.8364	52.2522	52.6703	53.0905	53.6261	54.2181	55.1332	56.1262	56.8969	57.6249	57.998	58.2782	58.2072	57.9471	57.3253	56.458	55.3222	53.8812	52.2466	50.0663	47.7006	45.3159	42.9308	40.6875	38.4924	36.5719	34.9519	34.0909	33.4629	33.1596	33.1708	33.437	34.9252	36.9713	39.9183	43.0619	46.8239	50.6022	54.251	57.7688	60.8324	63.7921
7	2	47.4124	48.5014	49.5941	50.7102	51.8246	52.9341	53.9822	54.939	56.0336	57.2467	58.5812	59.9749	61.5259	63.1146	64.4445	65.7361	66.7575	67.716	68.4361	69.316	70.5017	71.2316	71.4632	71.2983	70.8818	70.4629	70.0431	70.0621	70.1398	70.1654	70.1198	69.6682	68.8709	67.2007	65.3541	63.2621	61.0069	58.6195	56.5277	54.5708	52.121	49.5636	46.4223	43.1634	38.9873	35.189	32.7005	30.455
7	3	57.3741	57.8889	58.4362	59.1926	59.9949	60.9223	61.8311	62.7125	63.362	63.8118	64.2982	64.8025	65.7239	66.7456	68.1985	69.6546	70.8098	71.8506	72.4578	72.0777	69.8089	68.4177	67.9866	68.2675	69	69.4294	69.7557	69.9864	70.2078	70.6695	71.2208	72.2825	73.193	73.7216	74.6832	76.248	78.5229	81.3736	84.7825	88.4462	90.4778	92.1533	93.228	94.5032	98.1042	101.477	104.06	106.361
7	4	56.7529	57.8856	58.9983	59.9817	60.9203	61.7368	62.4236	62.9182	63.3395	63.6977	64.1435	64.6321	65.4676	66.3866	67.0295	67.6492	68.1967	68.7368	69.2488	69.8808	70.7428	71.779	73.0058	74.3684	75.8171	77.1723	78.4957	80.4332	82.4529	84.4025	86.2532	87.5407	88.348	87.9421	86.9831	85.2538	82.8244	79.8274	76.9438	74.112	71.505	68.9471	66.4367	63.8831	60.8671	57.793	54.5173	51.423
7	5	60.0917	60.2797	60.4771	60.7355	60.9766	61.1708	61.0972	60.6266	60.0049	59.2531	58.6395	58.0935	58.143	58.3357	59.397	60.506	61.5243	62.4836	63.2195	64.0567	65.0876	66.2146	67.4466	68.6423	69.8151	70.2763	70.4955	70.8111	71.143	71.6893	72.293	73.2238	74.0663	74.686	75.2777	75.8306	76.4122	77.0171	78.9474	81.4829	83.5725	85.5647	87.1636	88.7158	89.981	91.0364	91.3641	91.404
7	6	55.5502	55.5378	55.5886	56.0467	56.6489	57.6435	59.0715	61.1415	62.8209	64.164	65.1999	66.0854	66.6297	67.0918	67.6696	68.2571	68.8716	69.4884	70.1139	70.6915	71.1776	71.3856	71.2895	71.0487	70.7163	70.9614	71.4028	71.5678	71.6953	71.8221	71.9828	72.3373	73.05	74.6674	76.4428	78.4381	80.5773	82.8332	85.1204	87.422	89.8879	92.3897	95.0721	97.7874	100.751	103.679	106.479	109.005
8	1	48.6488	48.6658	48.6753	48.6371	48.6153	48.638	48.7644	49.0444	49.2725	49.456	49.8662	50.3872	51.1561	51.9848	52.8109	53.6558	54.7362	55.8903	57.3232	58.9029	60.763	62.9454	65.4805	67.8777	70.1875	72.1537	74.0031	75.1969	76.299	77.2201	78.0932	78.6934	79.1935	79.4406	79.4898	79.263	79.4007	79.834	80.5174	81.315	82.4142	83.5792	85.4449	87.416	90.1249	92.8838	95.8163	98.7207
8	2	68.312	69.4479	70.6013	71.8667	73.1517	74.4902	75.8265	77.1594	78.2606	79.1624	79.928	80.6272	81.1365	81.6001	81.5838	81.5779	82.0796	82.5689	83.0112	83.3176	83.364	82.4647	80.5309	78.2795	75.8268	73.4668	71.1384	69.4517	67.8007	62.7637	57.9099	54.1009	50.7851	48.7151	47.7873	48.4506	49.0999	49.7379	50.8651	52.2154	54.6036	57.2181	63.3775	69.4574	73.041	76.3117	78.4977	80.4072
8	3	64.5486	65.7092	66.9076	68.3487	69.8427	71.4804	73.1558	74.8869	76.4729	77.9338	79.4063	80.8845	82.47	84.0813	86.1296	88.1796	89.9066	91.4585	92.3479	92.9072	92.835	93.0253	93.5027	93.8712	94.1707	94.205	94.1491	93.5905	92.9572	91.8958	90.7782	89.3399	87.6983	85.5432	82.7104	78.9336	75.2214	71.5614	68.3015	65.2241	62.6529	60.1921	57.9361	55.7581	54.2764	53.0705	52.821	53.1455
8	4	62.6848	61.7477	60.9624	61.1551	61.5973	62.7187	64.1443	66.0207	68.1123	70.3894	72.3188	74.0782	75.3329	76.4662	76.9828	77.475	78.1487	78.9702	80.3511	82.0513	84.3625	87.0744	90.2246	93.1452	95.92	98.4881	100.986	103.281	105.539	107.138	108.41	107.809	106.549	103.626	99.5112	93.7384	88.2953	83.1195	78.0522	73.0343	68.038	63.0464	57.8192	52.7689	49.6299	46.9341	45.7748	45.3618
8	5	57.9982	59.7689	61.4781	62.7908	63.9864	64.8635	65.5513	65.9589	66.0781	65.949	65.4911	64.8723	63.7694	62.5499	60.2627	57.8606	54.8733	51.9384	49.2016	46.7478	44.8355	44.9334	47.2301	49.8129	52.5772	55.4486	58.3565	61.1504	63.9353	67.15	70.5157	74.7422	79.1402	83.9715	88.6871	93.2416	97.0484	100.249	101.652	102.234	100.867	99.0748	98.0885	97.1865	96.7572	96.4063	96.3276	96.3553
9	1	68.5113	69.3911	70.2602	71.0595	71.8467	72.6008	73.3023	73.9256	74.3676	74.6533	75.0408	75.4779	76.2289	77.0555	77.388	77.6326	77.1757	76.5884	75.5076	74.4571	73.4648	73.6126	75.0072	76.7014	78.5854	80.6602	82.7998	85.4418	88.1654	91.7721	95.4977	99.9014	104.194	108.207	111.206	112.793	113.76	114.223	114.51	114.716	114.764	114.778	114.791	114.779	114.507	114.231	113.939	113.844
9	2	66.1776	67.5236	68.8975	70.4508	71.929	73.2029	74.2622	75.0036	75.5217	75.8476	75.6949	75.3082	74.1812	72.8759	71.2291	69.5489	67.7225	65.8934	64.0534	62.1438	60.1008	57.6687	54.8111	51.8348	48.7832	46.1365	43.6276	42.4491	41.4717	41.8619	42.3309	43.2493	44.4143	46.2022	48.4386	51.3	54.7403	58.6501	62.1715	65.5155	67.7425	69.7259	70.8717	71.9497	72.737	73.5717	74.5705	75.7466
9	3	53.6239	54.0892	54.6333	55.6849	56.7958	58.0682	59.4623	61.0364	62.8017	64.7317	66.6021	68.4432	69.9239	71.3179	72.47	73.5619	74.0981	74.4931	74.3531	73.7933	72.4303	70.5102	67.981	65.411	62.8152	59.9407	56.9715	54.4391	51.988	50.9994	50.2413	50.7961	51.7626	53.7693	56.2257	59.3084	62.4352	65.5977	68.9226	72.3216	74.9415	77.3915	79.169	80.8568	81.9539	82.9368	83.5239	84.253
9	4	68.5771	68.7729	69.0076	69.4934	70.0549	70.8227	71.7079	72.7671	74.0792	75.6092	77.1165	78.6126	79.609	80.485	80.9916	81.4495	81.5929	81.6299	81.2635	80.2373	77.9491	75.857	73.9795	72.4389	71.1119	69.8147	68.5277	67.8917	67.3469	66.9975	66.4394	64.6918	62.7873	60.4863	58.3828	56.5543	55.8808	56.1439	56.7715	57.5654	58.0689	58.509	58.4784	58.5361	59.7154	61.2095	63.795	66.4701
9	5	41.7923	42.0381	42.3057	42.7145	43.0714	43.287	43.3355	43.1363	42.6913	42.0345	41.3178	40.5716	40.1161	39.7305	39.7824	39.8991	40.4751	41.1705	42.318	43.9672	46.5758	49.4254	52.5386	55.6189	58.6785	61.5874	64.4451	67.3198	70.1931	72.8278	75.3337	77.1062	78.6741	79.7252	80.6708	81.4697	82.4142	83.4767	84.9925	86.7151	88.1197	89.4549	91.1089	92.8402	95.206	97.716	100.726	103.833
9	6	65.7168	69.9991	74.2069	77.9343	81.3741	84.0311	86.1535	87.4842	88.2336	88.4826	88.4334	88.2386	87.9785	87.7029	87.2381	86.7861	86.6412	86.7519	87.8299	88.7975	89.5539	89.961	89.9861	90.04	90.1121	90.2684	90.4535	90.3603	90.2236	89.7005	89.0854	87.9461	86.3599	83.6444	81.2657	79.3559	76.3949	72.5815	68.8666	65.1967	61.3682	57.5051	55.9676	54.6405	54.3437	54.296	55.1118	56.7938
9	7	57.6848	59.8555	61.9751	63.7661	65.4887	67.0252	68.5094	69.9164	71.0961	72.0803	72.6903	73.1173	73.2732	73.3637	73.4441	73.5423	73.8696	74.1465	74.2324	74.4216	74.8087	75.4049	76.2301	77.4123	78.821	80.4387	82.1274	83.532	84.8918	85.8444	86.8217	87.9404	88.9803	89.8212	88.4326	83.9389	80.4852	77.875	75.7867	73.9368	72.0112	70.069	69.3407	68.7142	68.544	68.4732	68.7473	69.6236
9	8	43.6727	43.1746	42.6837	42.2392	41.7884	41.3207	40.8865	40.5022	40.268	40.1631	40.2913	40.5336	40.9682	41.449	41.9556	42.4451	42.7014	42.8812	42.7709	42.5084	41.9548	41.1579	40.0947	38.984	37.8432	36.9085	36.044	35.7277	35.4979	36.0726	36.7584	38.0772	39.5423	41.377	43.3778	45.6101	48.2268	51.1551	53.8636	56.4716	58.6552	60.7462	62.3595	63.9213	65.1864	66.3185	66.9894	67.4286
10	1	66.0866	66.0141	65.9591	66.0178	66.1149	66.3172	66.6771	67.2707	67.9222	68.6234	69.4033	70.2216	71.1941	72.2036	73.4954	74.8385	76.5947	78.5242	81.1095	83.7345	86.4354	89.122	91.7932	94.0915	96.1534	97.6633	98.9854	99.0383	98.8973	97.3104	95.6492	93.5638	91.4214	89.1351	86.8513	84.5707	82.0814	79.4228	75.749	71.6118	68.0723	64.6633	61.9473	59.4462	58.8008	58.3771	58.7218	59.2634
10	2	62.5694	63.9671	65.3657	66.7698	68.1757	69.5868	70.9519	72.2489	73.5008	74.7138	75.8575	76.9673	77.6658	78.2652	78.5886	78.8656	78.7861	78.5625	77.7933	76.9428	75.9368	74.8125	73.559	72.8259	72.4227	72.2836	72.2343	72.5311	72.8662	72.6352	72.3772	71.9652	71.543	71.0951	70.7928	70.6934	70.7099	70.8205	71.1426	71.5613	71.6315	71.6256	71.4603	71.3023	71.2943	71.4452	72.1467	73.038
10	3	67.8393	69.5023	71.105	72.3193	73.4016	74.1245	75.0754	76.3639	77.4013	78.2223	78.6065	78.777	78.8559	78.9128	79.0558	79.2166	79.5286	79.6056	78.7922	77.544	75.4637	72.3776	68.1914	64.5271	61.1939	58.5091	56.0447	55.0068	54.1729	54.0328	53.9636	54.2985	54.8614	55.9999	57.7562	60.373	63.3601	66.6475	70.2452	73.9847	76.6832	79.1546	80.907	82.5495	83.4174	84.187	84.6152	84.9844
10	4	50.7184	51.5945	52.5083	53.6653	54.9049	56.3695	57.8635	59.401	60.9359	62.4686	63.994	65.5158	67.0213	68.5229	69.8046	71.0449	71.9445	72.8081	73.5356	74.1615	74.5931	74.7765	74.6887	75.0409	75.6723	76.4554	77.29	78.2157	79.1474	79.6601	80.1902	80.8201	81.6562	83.0131	84.7505	87.018	89.3628	91.7702	93.6396	95.2633	95.9959	96.5341	96.5201	96.4464	96.029	95.299	93.4854	91.3235
10	5	69.3595	71.3479	73.3359	75.3212	77.3054	79.2871	81.2102	83.0463	84.8296	86.5675	88.2246	89.8423	90.7657	91.5221	92.0347	92.5113	92.7336	93.008	93.4796	93.9379	94.3707	94.7313	95.0129	95.0994	95.0621	94.2058	93.0711	89.7809	86.2406	85.492	84.7739	84.2301	83.1514	80.7216	79.2406	79.0814	79.3095	79.8518	79.9938	79.9531	81.2764	82.8974	85.0028	87.0039	87.7137	88.6894	90.587	92.5602
10	6	76.234	75.4453	74.6544	73.8487	73.038	72.2136	71.396	70.5885	69.7551	68.8996	68.0009	67.0811	66.0994	65.1028	64.1132	63.1259	62.1609	61.1895	60.1937	59.1775	58.1227	57.0177	55.8581	54.8329	53.8928	53.0591	52.2617	51.6612	51.09	50.6882	50.2925	49.9316	49.5624	49.1722	48.7651	48.3344	47.9565	47.6213	47.5813	47.6761	48.7623	50.0648	51.8741	53.6915	55.35	57.0852	59.0857	61.1796
11	1	51.7717	51.3057	50.856	50.5118	50.208	50.0139	49.8944	49.8856	49.906	49.9515	49.9495	49.9242	50.0163	50.1367	50.6655	51.2494	52.1963	53.1372	54.0554	54.9557	55.8217	56.6574	57.46	58.3353	59.2567	60.0464	60.7913	61.368	61.919	62.2788	62.6296	62.9295	63.2203	63.4878	63.7505	64.0063	64.276	64.557	64.9352	65.3579	65.8121	66.2731	66.728	67.1749	67.5434	68.0902	69.2548	70.5257
11	2	59.8999	62.6705	65.2922	66.9552	68.4534	69.5028	70.5153	71.4731	73.1247	75.3738	77.1951	78.8073	79.9339	80.9435	81.4495	82.019	83.772	85.5251	87.2789	88.9938	90.6343	92.1749	93.6063	94.4772	94.9926	95.5382	96.0939	96.5416	96.9666	96.8633	96.7114	96.2824	95.8035	95.1983	94.5754	93.9278	93.3937	92.9514	90.4184	86.931	83.2572	79.5426	75.531	71.379	65.941	60.3996	54.4995	48.5988
11	3	50.5499	51.6303	52.7316	53.9674	55.2317	56.5733	57.9371	59.3336	60.4273	61.26	62.1331	63.026	63.9482	64.8776	65.7989	66.7094	67.4933	68.216	68.707	69.1075	69.335	69.4552	69.4579	69.2804	68.9886	69.1179	69.3905	70.0068	70.6698	71.3375	71.9745	72.4368	72.6691	72.3205	71.9686	71.6123	72.2467	73.6846	75.8548	78.3594	81.2381	84.1985	87.2689	90.2969	92.8412	95.2107	96.9743	98.5002
11	4	54.0605	54.8593	55.716	56.9454	58.259	59.8016	61.4223	63.1588	64.2501	64.786	65.3268	65.8701	66.2143	66.5105	66.2253	65.7413	63.2508	60.7653	58.2986	55.8589	53.4709	51.0938	48.7287	46.3644	44.0007	42.5319	41.3674	40.9225	40.576	40.2795	40.0195	39.9674	40.1329	40.8481	41.9243	43.5036	45.6493	48.2544	51.0537	53.9417	56.5963	59.2	61.7929	64.4606	67.893	71.3311	74.7891	78.2096
11	5	54.136	54.2964	54.414	54.2559	54.0134	53.5412	52.9405	52.1496	51.1008	49.8298	48.9058	48.1513	47.5676	47.025	46.2978	45.5457	44.6309	43.7308	42.886	42.1642	41.6774	41.5721	41.8841	42.7662	44.0099	45.602	47.3125	49.2138	51.1387	52.9096	54.7005	56.6054	58.5485	60.5881	62.6839	64.8577	67.1102	69.4266	71.716	73.9931	76.1524	78.2859	80.3498	82.422	84.6117	86.8646	89.3366	91.852
11	6	57.3155	57.8069	58.2878	58.7005	59.1022	59.4741	59.8459	60.2175	61.0787	62.3616	63.4825	64.5241	65.5602	66.595	67.9358	69.3076	70.8232	72.2908	73.5762	74.7371	75.6596	76.3147	76.677	77.1892	77.7964	78.2023	78.5398	78.527	78.4579	77.8071	77.1164	76.1986	75.4001	74.903	74.4608	74.0953	73.3982	72.4321	70.6653	68.533	66.0342	63.4555	60.8808	58.3868	56.7104	55.1088	53.7669	52.5951
[truncated: 78 more columns]

## Sheet: TeTX4.xls
Session	Step	1	2	3	4	5	6	7	8	9	10	11	12	13	14	15	16	17	18	19	20	21	22	23	24	25	26	27	28	29	30	31	32	33	34	35	36	37	38	39	40	41	42	43	44	45	46	47	48
1	1	85.6966	86.5965	87.3882	88.001	88.2322	88.3645	88.6719	89.0098	89.3776	89.5872	89.7645	89.9096	90.0203	90.1155	90.5142	90.9807	91.5533	92.5033	93.5024	94.1058	94.4981	94.6951	95.0213	95.3073	95.446	95.1688	94.6618	93.9604	93.2091	92.3838	92.3931	92.6815	93.2014	93.9801	94.9861	92.4332	89.1121	84.7604	82.5261	81.3918	80.7624	80.4278	80.5077	80.536	80.5047	80.2472	79.1959	77.4831
1	2	81.8615	81.1859	80.5013	79.8018	79.0981	78.3315	77.1522	76.5209	76.4237	76.2732	76.0839	75.8043	75.525	75.2458	74.9708	74.6547	74.2743	73.95	73.7025	73.813	74.1336	74.6486	74.8218	75.0797	75.669	76.5143	77.4896	78.1629	78.6901	79.0003	79.8394	80.6505	80.4987	80.272	79.9794	79.3263	78.5404	77.5122	74.9678	71.5762	66.3524	61.0806	55.7412	49.6335	43.5359	38.4804	34.9932	32.813
1	3	69.0669	72.3005	75.4464	78.4469	80.9896	83.3153	85.1922	87.0105	88.7716	90.9277	92.5187	92.3502	90.7526	88.3317	85.3993	82.6133	80.0567	78.0349	76.3095	75.3827	74.9085	74.853	76.6121	78.9179	82.1206	85.5645	89.1274	92.2661	94.8926	96.7591	98.3379	99.8359	101.338	102.644	103.778	104.631	105.473	106.361	107.486	108.747	110.375	111.936	113.405	114.831	116.244	117.643	119.007	120.342
1	4	60.8846	62.2263	63.833	65.8783	68.7325	71.7778	74.3282	76.7771	79.1271	81.2828	83.4342	85.6466	87.8964	90.1395	90.238	90.0396	89.3761	87.7984	86.3253	87.1541	88.4481	90.1725	92.3333	94.7392	97.6638	100.949	104.426	107.829	110.996	113.814	115.803	117.105	115.949	114.106	111.661	107.517	102.789	97.0285	90.4574	83.443	75.6869	68.2441	61.2416	55.5147	50.182	45.1422	40.3992	35.9035
1	5	60.0181	60.9907	61.9633	62.936	63.7548	64.5226	65.2855	65.9571	66.5397	67.1134	67.5276	67.4906	67.4203	67.3331	67.3983	67.4706	67.554	68.0713	68.7332	69.4686	70.0042	70.3549	70.6409	70.6663	70.017	69.2315	68.3243	65.6046	62.6852	59.4693	56.8628	54.4668	52.2757	49.8201	47.1323	44.2833	42.1116	41.6737	41.8909	42.4554	43.3532	44.3176	45.3755	49.2532	54.1829	60.6511	66.3042	71.2779
1	6	80.0901	79.2617	78.4333	77.6049	76.924	76.3089	75.8103	75.3182	74.8324	74.3951	73.9642	73.5333	73.323	73.2401	73.2529	73.2586	73.2531	73.2244	73.1885	73.1526	73.9186	75.4263	76.9786	78.3888	79.4062	80.1509	80.7457	81.2419	81.518	81.4674	81.4168	81.5891	82.9692	84.6031	86.46	88.4335	90.4886	92.7186	94.9487	97.1737	99.2773	101.377	103.473	105.67	107.913	110.251	112.601	114.961
2	1	49.6213	50.0131	50.4493	50.9589	51.5381	52.1389	52.7324	53.1289	53.3337	53.4973	53.6505	53.7901	53.9414	54.1001	54.3154	54.4273	54.3772	54.1896	53.9233	53.4371	52.8606	52.2005	51.8089	51.4782	51.2274	50.9938	50.7734	50.7002	50.7559	51.003	51.5081	52.1367	53.0391	54.1082	55.3237	56.8154	58.4232	60.2522	62.334	64.5554	67.0462	69.6003	72.2433	74.8925	77.5403	80.1733	82.6276	84.933
2	2	58.2009	59.2505	60.3584	61.5629	62.8175	64.1095	65.5418	67.4165	69.7223	71.4833	72.9837	73.9471	74.8202	75.6509	77.1898	78.6793	80.0915	81.4518	82.7995	84.1666	85.5358	86.907	88.0369	88.7474	88.4144	87.8988	87.2954	87.0982	87.322	88.1706	89.3388	90.3662	90.1406	89.6862	89.0309	88.3807	87.6432	86.686	84.5547	81.7742	77.7486	73.8851	70.2495	68.3714	67.186	67.142	67.7217	68.8212
2	3	62.421	63.3853	64.4972	65.8535	67.3722	68.9491	70.5602	72.0562	73.4402	74.4549	75.3618	76.1003	76.7746	77.4128	78.0928	78.9193	79.9755	80.9979	81.9999	82.9404	83.8608	84.7625	85.7955	86.9583	88.4266	89.749	90.9836	91.877	92.6223	93.148	93.3443	93.4055	93.2402	93.1656	93.1707	93.2433	93.0394	92.1272	90.6942	88.9794	86.8646	84.5628	81.9978	79.0012	75.721	71.6014	67.3171	62.8956
2	4	71.5129	72.4467	73.3569	74.2279	75.1051	75.9931	76.94	77.9568	79.0418	80.0009	80.8971	81.6615	82.3354	82.9567	83.5055	84.0175	84.4719	84.7522	84.8984	84.5588	84.0128	83.2758	83.41	83.9644	85.3703	87.2119	89.298	91.7294	94.1703	96.625	99.1043	101.608	104.207	106.848	109.525	111.633	112.833	111.902	110.133	107.911	105.044	101.969	98.5992	94.9424	91.1599	87.1292	82.6338	77.7513
2	5	58.2351	58.1017	57.9708	57.8439	57.7286	57.6158	57.4945	57.297	57.0252	56.601	55.9944	54.9252	53.5026	51.8742	49.962	48.3156	47.0856	45.8658	44.6421	43.3769	42.1953	41.0908	40.9978	41.4881	43.2213	45.2894	47.5454	50.0709	52.686	55.4338	59.1357	63.1146	67.1289	70.9404	74.5737	77.8176	81.0519	84.3595	87.8045	91.2857	93.9312	96.2057	97.9587	99.1732	100.233	101.228	102.222	103.218
2	6	72.2084	72.3716	72.5321	72.6884	72.8209	72.9423	73.041	73.1738	73.3397	73.6872	74.0493	74.385	74.6532	74.8811	74.9702	74.9249	74.6692	74.2164	73.6879	73.0652	72.4304	71.7842	71.1219	70.4978	69.9807	69.498	69.0268	68.2984	67.3194	65.9686	64.5206	63.1455	62.3149	61.6494	61.1287	60.9437	61.1242	62.1348	63.2392	64.4035	65.8632	67.4147	69.0953	70.8467	72.6486	74.6074	76.8025	79.1945
3	1	72.6214	73.6111	74.5536	75.418	76.1159	76.746	77.2864	77.8293	78.3744	79.3381	80.3626	81.4028	82.4597	83.5273	84.6867	85.9137	87.2463	89.1434	91.1984	93.1666	95.0886	96.9678	98.3423	99.604	100.721	101.588	102.341	103.918	105.705	107.805	109.027	109.739	109.037	106.634	102.737	97.0592	90.9906	84.3891	78.6122	73.2682	68.2336	63.3798	58.7799	54.5247	50.5282	47.3612	46.938	48.8013
3	2	80.5095	83.1544	85.8674	88.6933	91.7597	94.8109	97.2318	99.4943	101.602	103.369	104.994	106.342	107.395	108.272	108.527	108.691	108.713	108.42	108.023	107.585	107.125	106.645	105.414	104.047	102.55	100.906	99.1936	97.8843	96.6785	95.6263	94.6943	93.8134	93.0257	92.3484	91.768	91.0624	90.3231	89.5307	88.5847	87.5454	86.1398	84.5206	82.6006	79.9405	77.0038	73.6617	69.5862	64.8995
3	3	60.8562	61.339	61.9086	62.622	63.6419	64.7753	65.996	67.21	68.4175	69.134	69.8249	70.6277	71.5497	72.543	73.7723	75.0275	76.3233	77.6555	78.9886	80.2593	81.4968	82.7037	83.2338	83.6286	83.8713	83.8886	83.7969	84.1836	84.6931	85.3848	86.4702	87.6413	88.6717	89.5188	90.2049	90.5079	90.7117	90.7634	90.4839	90.0052	88.7758	87.1083	84.8245	81.0588	76.8382	72.2913	68.0968	64.1959
3	4	73.3648	74.2682	75.2344	76.3046	77.5964	78.9229	79.9959	80.9926	81.915	82.4651	82.9169	83.2284	83.3906	83.4651	83.3458	83.3261	83.4624	84.727	86.2924	87.5962	88.7606	89.796	90.5975	91.3082	91.8493	92.0072	91.9493	91.5552	91.0748	90.4665	89.1243	87.431	84.9611	81.5635	77.3513	72.4449	67.3888	62.1318	57.2897	52.7117	49.4334	46.9139	45.4615	45.2797	45.5402	46.3369	47.7933	49.7995
3	5	58.8259	60.0762	61.3121	62.5245	63.6865	64.8113	65.7969	66.7601	67.7017	68.8058	69.9443	71.1199	72.3347	73.5605	73.9043	74.1092	74.0964	73.5418	72.6677	70.8689	68.577	65.829	64.1307	62.6512	61.4307	60.6203	60.0529	60.2866	60.7258	61.47	62.2902	63.1317	63.9724	64.8098	65.6445	66.6842	67.776	68.9471	70.2675	71.701	74.0465	76.9243	80.5507	84.1901	87.811	91.3236	94.4163	97.1591
3	6	78.1137	80.1224	81.9761	83.5734	84.6239	85.4998	86.406	87.3168	88.2321	89.1066	89.9556	90.7473	91.4779	92.173	92.8162	93.4788	94.1715	95.0955	96.0877	97.0659	98.0366	99.0004	99.7165	100.37	100.931	101.317	101.612	102.051	102.527	103.058	103.733	104.443	105.119	105.75	106.34	106.819	107.255	107.615	107.435	106.961	105.996	104.745	103.092	100.514	97.5966	94.2071	90.0304	85.1977
4	1	87.7382	91.1835	94.2614	96.7311	98.5172	100.065	101.52	102.915	104.25	105.487	106.654	107.665	108.745	109.867	111.037	112.13	113.105	113.857	114.516	115.027	115.518	115.991	116.385	116.736	116.996	117.033	116.93	116.073	114.942	113.402	110.901	108.053	104.797	101.491	98.1408	94.9543	91.838	88.8564	86.0327	83.3059	80.9853	78.8965	77.1336	75.3037	73.392	71.1643	67.8384	63.5975
4	2	69.8167	70.7406	71.672	72.6158	73.5626	74.4642	75.0553	75.6542	76.2607	76.8805	77.5106	78.1655	79.0584	80.09	81.324	82.4133	83.276	84.4624	85.7758	87.2593	88.6152	89.853	91.6373	93.5413	95.5955	97.405	99.0753	100.479	101.745	102.809	103.278	103.455	102.962	102.06	100.801	98.303	95.5702	92.5584	89.3218	85.9499	82.0706	77.4087	71.6465	66.7544	62.5664	60.7217	59.6739	59.2904
4	3	75.8559	76.3312	76.762	77.1192	77.4009	77.687	78.1681	78.9256	79.9522	81.3707	82.8753	84.4773	86.0041	87.4873	88.9307	90.4926	92.2403	93.9307	95.5825	97.1076	98.3337	99.2833	100.148	100.989	101.792	102.578	103.343	103.686	103.898	103.915	103.54	103.057	102.583	102.104	101.619	101.095	100.527	99.8561	99.2023	98.5626	98.0614	97.2248	95.9167	93.8065	91.2168	87.3026	82.5558	77.1153
4	4	73.0415	75.2448	77.3644	79.3457	81.1561	82.8417	84.0652	85.3271	86.6263	87.9636	89.2531	90.3921	91.2253	91.8799	92.2378	92.6705	93.2202	93.8082	94.4138	95.0551	95.7335	96.4463	96.7117	96.8854	96.9529	97.283	97.7596	98.4064	99.0377	99.6462	99.9711	100.16	100.046	99.7925	99.4153	98.6817	97.8298	96.7707	95.3602	93.7309	91.1225	88.1122	84.5366	80.5831	76.4429	71.8717	67.5191	63.3486
4	5	55.9676	56.0421	56.1166	56.1911	56.2743	56.3978	56.7725	57.1472	57.5219	57.8749	58.1481	58.2026	58.257	58.3114	58.365	58.4161	58.4633	58.5105	58.5647	58.6604	58.8951	59.2582	59.6213	59.9093	59.9969	59.3332	58.2637	57.1942	56.1477	55.1353	54.2708	53.4484	52.6259	52.1317	51.9258	53.2414	54.709	56.1767	57.4934	58.713	59.4395	60.166	60.8925	61.4748	61.9614	62.1622	62.363	62.5639
5	1	90.8415	91.0874	91.3536	91.6535	91.978	92.305	92.5946	92.8243	92.9958	93.0607	93.0651	92.9374	92.7994	92.658	92.7086	92.856	93.1549	93.5433	93.9655	94.4263	94.9477	95.5252	96.4874	97.4048	98.0834	98.4772	98.6988	98.2338	97.3933	95.9956	94.2833	92.4338	90.3242	88.5596	87.0979	85.2135	83.1569	80.7759	77.9339	74.8465	71.5018	68.2072	64.9829	62.0838	59.7198	59.5698	59.5976	59.7736
5	2	79.3157	80.0069	80.6625	81.2591	81.7482	82.1478	82.1835	82.0988	81.8969	81.9954	82.3999	83.5633	84.3301	84.8724	85.5866	86.4218	87.4461	87.5054	87.259	86.9454	86.6173	86.2757	86.0502	85.8513	85.6872	85.4995	85.296	84.9798	84.6734	84.3816	84.1484	83.9512	83.8597	84.345	85.3368	86.9303	88.6909	90.7191	92.6116	94.4044	95.4412	96.2081	96.5955	96.3488	95.6163	93.3099	89.8032	85.2961
5	3	56.77	58.1223	59.693	61.6252	63.9687	66.5336	69.6784	72.9551	76.3603	79.8083	83.2299	86.5604	89.4396	92.0573	94.3943	96.6342	98.7223	99.7836	100.461	100.712	100.782	100.683	100.543	100.472	100.598	100.768	100.959	101.093	101.227	101.362	101.32	101.185	100.814	100.245	99.5003	98.866	98.1692	97.2884	95.4332	93.0584	90.1222	86.9526	83.4551	79.3616	75.1341	71.0165	67.2875	63.8822
5	4	71.1514	71.6203	72.0919	72.5678	73.0563	73.5573	74.1153	74.6615	75.1963	75.7011	76.1865	76.628	77.1134	77.6246	78.1954	78.7919	79.4287	80.2139	81.0579	81.9833	82.9384	83.9208	84.8661	85.8026	86.727	87.6591	88.5964	89.5713	90.5503	91.5356	92.3058	92.9637	93.3438	93.6207	93.8071	93.1281	92.1762	90.7584	89.2049	87.559	85.3368	83.0068	80.5252	77.934	75.262	72.3337	69.353	66.3284
5	5	79.6446	78.0523	76.4478	74.8234	73.1987	71.5913	70.1007	68.5721	67.0066	65.3293	63.577	61.6529	59.7232	57.7915	55.9463	54.1496	52.4287	51.2343	50.2161	49.2917	48.4803	47.7732	47.7021	47.9266	48.7429	49.606	50.4823	50.9076	51.4451	52.1492	53.0904	54.1517	55.4999	57.2294	59.2936	61.5134	63.77	66.0798	68.2895	70.4471	72.5833	74.4516	75.9433	76.4254	76.4692	75.6589	74.2492	72.3401
6	1	70.6192	71.0444	71.5439	72.1662	73.1539	74.2147	74.9635	75.5796	76.0663	76.3949	76.6751	76.8772	76.8095	76.588	76.3927	76.2104	76.0484	75.7414	75.379	74.9501	74.3202	73.5042	73.0906	72.9947	73.622	74.2863	74.9717	75.6941	76.6923	78.0995	79.4607	80.7047	81.3839	81.7766	81.9177	81.4996	80.6114	78.6875	76.4132	73.9098	70.1649	66.3237	62.3471	58.0035	53.7107	50.1421	46.8622	43.8228
6	2	75.4122	78.5625	81.7121	84.8602	88.0042	91.0836	93.7393	96.2148	98.5146	101.562	104.666	107.65	109.623	111.007	111.556	111.693	111.185	110.747	110.332	109.927	109.046	107.723	106.369	104.99	103.557	102.379	101.347	100.571	99.9986	99.728	99.4084	98.9841	98.0677	97.1392	96.2	95.237	94.185	92.9161	91.5579	90.1233	87.9297	85.6011	83.0827	80.0497	76.7796	73.0063	69.0326	64.8918
6	3	54.0501	55.9545	57.9571	60.1221	62.7704	65.5445	68.1009	70.5647	72.9383	74.3445	75.5249	76.4263	76.6084	76.3718	75.5557	74.4537	72.9037	72.2045	71.8279	71.8294	72.6853	74.3317	76.2918	78.4998	81.2718	84.3932	87.7126	91.3813	94.8679	98.0841	100.913	103.314	103.996	104.005	103.424	101.533	99.3187	96.6244	93.705	90.5681	84.8984	79.3452	73.9558	69.0104	64.2789	60.0266	55.9652	52.063
6	4	56.6172	55.043	53.6168	52.4354	51.9821	51.7662	51.5429	51.3163	51.0867	51.5768	52.2086	52.9726	53.9203	54.9728	56.0104	57.0406	58.0591	58.4061	58.5025	58.325	58.1274	57.9111	57.6084	57.2374	56.7109	55.4963	53.8918	51.5991	49.1046	46.3106	43.7379	41.4777	40.5711	40.4175	40.9252	42.9024	45.4105	48.8787	52.6468	56.5827	60.8872	65.2527	69.7041	74.3883	79.0143	83.0534	86.8585	90.4688
6	5	60.2449	59.884	59.5219	59.1579	58.7878	58.4101	57.9933	57.5599	57.1103	56.7459	56.41	56.1236	56.0165	56.0118	56.0049	55.997	55.9873	55.9729	55.9559	55.9319	55.7703	55.4817	55.1175	54.6938	54.1345	53.6246	53.1428	52.7104	52.3053	51.9406	51.6026	51.2909	51.0799	50.881	50.6926	50.5277	50.2863	49.8477	49.3485	48.8163	48.2362	47.7689	47.4602	47.5816	47.818	48.0656	48.3176	48.5734
7	1	65.3693	65.6828	66.0147	66.3772	66.8161	67.3059	67.9691	68.6862	69.4557	70.9678	72.5849	74.2211	75.8678	77.5202	79.1579	80.7922	82.4212	84.0596	85.7044	87.3708	89.0697	90.7988	92.4837	94.1548	95.8029	97.3397	98.8106	100.063	101.073	101.723	101.26	100.324	98.5392	96.0598	92.9703	89.6864	86.3016	82.713	79.0048	75.2302	71.3221	68.2707	66.4238	65.3109	64.801	66.3116	68.16	70.2901
7	2	76.7502	77.4861	78.2303	78.9883	79.7804	80.5886	81.429	82.2793	83.1394	83.8461	84.5552	85.3293	86.2368	87.2218	88.3117	89.4259	90.5781	91.5922	92.5407	93.3481	93.9494	94.36	94.5454	94.6606	94.6584	94.5383	94.3513	94.0444	93.6116	92.9919	92.3125	91.6077	90.8575	90.5271	90.5653	90.7922	91.1584	91.8256	91.9091	91.6685	90.7764	89.6923	88.3385	86.7191	84.8605	82.1673	79.3366	76.3912
7	3	51.6649	52.0754	52.4948	52.9293	53.4011	53.8913	54.4218	54.9649	55.5202	56.1325	56.7468	57.3457	57.912	58.4593	58.9731	59.4792	59.9732	60.5393	61.1321	61.7534	62.4126	63.1071	63.8437	64.5935	65.3652	66.157	66.9597	67.7696	68.5854	69.41	70.2596	71.1198	71.9989	73.0155	74.1527	75.2731	76.3525	77.3338	78.2691	79.1788	80.037	80.8496	81.5978	82.3679	83.1688	84.0928	85.0192	85.9478
7	4	50.761	51.1082	51.4454	51.7658	52.0446	52.2946	52.4426	52.5589	52.6445	52.0301	51.2807	50.4105	49.3288	48.1283	47.0981	46.1071	45.1779	45.3277	45.8172	46.37	46.9358	47.5137	48.2523	49.0409	49.9134	51.0757	52.4018	53.999	55.8783	58.176	60.8791	63.7542	66.9383	70.4998	74.3927	78.194	81.8331	85.0898	88.2024	91.2351	94.107	96.8841	99.5277	102.13	104.708	107.214	109.656	112.043
7	5	68.8919	68.8019	68.6995	68.5768	68.4034	68.249	68.3334	68.492	68.7228	69.4159	70.1962	71.0506	72.0336	73.0887	74.0384	74.9638	75.8509	76.8962	77.9971	79.1425	80.3439	81.5973	82.9182	84.2602	85.6374	86.6077	87.3603	88.1894	89.1582	90.334	90.9817	91.4055	91.4267	91.2603	90.9293	90.4029	89.6922	88.5694	87.0971	85.4307	83.3742	81.0459	78.3354	76.1004	74.4034	74.7412	75.1136	75.5148
8	1	94.2154	94.0547	93.8976	93.7464	93.6035	93.4431	93.1471	92.8071	92.4242	91.9357	91.519	91.3465	91.4045	91.6033	92.4911	93.4678	94.5838	95.7316	96.8736	97.9226	99.0684	100.304	101.547	102.661	103.426	103.706	103.712	103.2	102.468	101.412	100.282	99.1192	97.8834	95.4029	91.8295	88.4934	85.2932	82.3736	80.1439	78.2888	76.9998	76.0604	75.6128	75.511	75.5645	75.9357	76.7084	77.8158
8	2	70.2976	71.3365	72.4191	73.5742	74.8322	76.1556	77.6917	79.2283	80.7654	82.2734	83.7096	84.9519	86.1024	87.1976	88.0756	88.9343	89.7628	90.5384	91.2709	91.8412	92.146	92.205	92.1258	92.1754	92.6109	93.1183	93.6663	94.288	94.9209	95.5705	96.2571	96.961	97.7019	98.1215	98.2588	98.2495	98.1713	97.9575	97.1706	96.0699	94.4325	92.4535	89.9943	86.9655	83.7274	80.1942	76.3846	72.3444
8	3	68.6646	68.6321	68.6796	68.8596	69.2275	69.6445	69.978	70.2723	70.5284	70.685	70.9071	71.3537	71.7623	72.1455	72.2581	72.5595	73.157	74.0521	75.1573	76.9778	79.0232	81.2767	83.7269	86.2263	88.7959	91.3387	93.8653	96.3272	98.5438	100.397	101.841	103.094	103.939	104.727	105.467	106.084	106.64	107.075	106.727	105.991	105.552	105.437	105.78	105.61	105.186	104.169	102.348	99.8595
8	4	74.8499	74.3263	73.7747	73.1769	72.5134	71.9031	71.7929	71.7487	71.7689	71.9051	72.3471	73.617	75.0105	76.474	77.8943	79.2613	80.5447	81.8187	83.1055	84.4863	85.8114	87.0851	88.2247	89.1827	89.6981	90.2472	90.8161	91.4463	92.2546	93.3271	94.3339	95.3101	96.2206	96.7932	97.0691	97.1524	97.1442	96.9551	96.4063	95.6648	94.6919	93.5857	92.2922	91.5606	91.0095	90.6217	90.2909	90.0077
8	5	55.0715	57.7659	60.4717	63.1962	65.9475	68.6757	71.1909	73.6563	76.0732	78.3789	80.7246	83.226	85.4694	87.5518	88.6083	89.4251	89.8664	90.1173	90.2826	90.2827	90.2074	90.0623	89.9297	89.9367	90.3116	91.2373	92.4762	94.3079	96.4122	98.921	101.132	103.203	104.976	106.375	107.446	107.901	108.052	107.6	106.027	103.842	100.676	96.8936	92.2448	87.0269	81.5825	75.7582	69.514	62.9198
8	6	92.453	93.0057	93.56	94.117	94.678	95.1752	95.2367	95.214	95.1093	94.8278	94.5201	94.204	93.8998	93.6029	93.3537	93.0838	92.7816	92.3283	91.7375	90.5983	89.6082	88.756	88.0465	87.3937	86.8486	86.4077	86.0266	85.7758	85.693	85.8595	86.2318	86.7003	87.3746	88.2229	89.2241	90.3305	91.487	92.7427	93.1383	93.0683	92.3315	91.1886	89.4747	87.3677	85.1698	83.0321	81.1487	79.4772
9	1	69.55	70.0558	70.6123	71.2526	71.9266	72.5977	73.1751	73.6763	74.1031	74.5064	74.9095	75.3207	75.8033	76.323	76.5544	76.6881	76.6687	76.4533	76.1753	75.8812	75.5751	75.258	74.7843	74.161	73.1869	71.0496	68.2853	65.5681	62.9627	60.5233	57.9398	55.3452	52.9112	50.6704	48.5992	46.9817	45.4972	44.2315	44.3336	45.178	47.134	48.9871	50.6958	52.8927	55.2664	57.8805	60.551	63.2685
9	2	59.6396	61.3247	63.0976	65.0155	67.0024	68.9932	70.8587	72.2251	73.105	74.0242	74.987	76.0592	76.9645	77.7722	78.4075	79.0232	79.6083	80.2034	80.7839	81.2584	81.8446	82.5342	83.4461	84.4812	85.776	86.9927	88.1773	89.7397	91.4749	93.4663	95.5876	97.6589	99.2596	100.786	102.248	103.781	105.25	106.543	107.715	108.816	109.713	110.48	111.065	111.747	112.224	111.572	110.158	108.107
9	3	75.8698	76.1295	76.417	76.7507	77.1266	77.521	77.9459	78.3448	78.7184	79.0939	79.4766	79.8792	80.3595	80.8854	81.5061	82.1457	82.815	83.5056	84.1489	84.4692	84.8264	85.2177	85.7001	86.2411	86.9106	87.389	87.7655	88.1921	88.65	89.1543	89.572	89.9193	90.017	89.9831	89.8336	89.4586	88.9872	88.331	87.4561	86.4508	84.9801	83.1526	80.8234	76.6871	72.0734	67.4434	63.0716	58.915
9	4	84.777	85.2614	85.7154	86.119	86.4774	86.8167	87.1261	87.4275	87.721	88.0194	88.3182	88.6159	88.8729	89.1053	89.2381	89.3606	89.4671	89.583	89.7085	89.8736	90.0316	90.1828	90.3195	90.4479	90.559	90.6604	90.7584	90.9272	91.1208	91.3511	91.5095	91.6727	91.973	92.3925	92.9164	93.6971	94.5225	95.3954	96.3708	97.3985	98.4261	99.3377	100.086	100.925	101.682	101.92	101.859	101.548
10	1	82.4482	84.1502	85.8004	87.3651	88.8083	90.2254	91.7338	93.1913	94.599	95.8486	96.9977	97.92	98.7806	99.6047	100.34	100.885	101.133	101.218	101.222	101.045	100.883	100.734	100.606	100.493	100.416	100.306	100.179	100.022	99.8788	99.7555	99.3853	98.8994	98.1667	97.3644	96.5012	95.321	93.9834	92.3312	90.9429	89.6794	88.1723	86.4453	84.409	82.197	79.8402	76.9973	73.4024	69.1809
10	2	65.9167	68.19	70.4485	72.6825	74.8817	77.1017	79.5372	81.8138	83.9355	85.5739	87.0601	88.2951	89.5004	90.6893	91.9201	93.0434	93.9983	94.7364	95.309	95.2861	95.0763	94.6936	94.2183	93.8427	93.7616	93.5453	93.255	92.9304	93.2584	94.555	95.8903	97.2437	98.6358	100.067	101.531	102.854	104.106	105.215	105.925	106.399	106.079	105.196	103.524	99.5908	94.951	89.7534	84.4931	79.1807
10	3	62.4907	64.27	66.0283	67.7519	69.4261	71.0441	72.3931	73.7122	75.0021	76.2455	77.3245	77.9528	78.4934	78.9833	79.423	79.9036	80.4484	81.0386	81.6557	82.3516	82.8967	83.3022	83.5634	83.7671	83.8619	83.9845	84.1229	84.295	84.5054	84.7728	85.7347	87.0216	89.0032	90.687	92.1093	93.2778	94.3236	95.1259	95.3945	95.396	95.5212	95.8075	96.3206	93.7281	90.1725	85.8862	81.5739	77.2399
10	4	54.4945	54.6709	54.8897	55.1788	55.5676	56.0007	56.5111	57.0296	57.5559	58.0939	58.6584	59.2943	60.1184	61.0584	62.6373	64.2217	65.8149	67.347	68.8177	70.0321	71.0154	71.785	72.4864	73.4036	74.9168	76.6066	78.3959	80.3391	82.1351	83.7126	84.8544	85.7924	86.2946	85.7496	84.2851	82.3033	80.0774	77.3707	74.612	71.8282	69.0805	66.367	63.7017	61.2054	58.8188	56.7538	55.1661	53.9759
10	5	60.1139	60.6526	61.3414	62.2784	63.5676	64.9298	66.0077	67.0805	68.1483	69.2425	70.3702	71.5834	72.7787	73.9623	75.0305	75.8715	76.3569	76.5402	76.5248	75.8709	75.3654	74.9974	74.7244	74.4146	73.9773	73.5876	73.2251	72.9105	72.5972	72.2857	72.3828	72.6711	73.3679	73.3868	72.8103	71.6901	70.3073	68.4044	65.4621	61.979	58.2289	54.4023	50.4682	47.7739	45.5485	44.0308	43.2257	43.0142
10	6	77.4919	78.9498	80.4614	82.0617	83.7878	85.5181	86.9992	88.3396	89.5429	90.3814	91.1467	91.8406	92.5689	93.3191	94.2362	95.2196	96.3069	97.3366	98.2835	98.8391	99.2638	99.5672	99.7525	99.9017	99.9914	100.004	99.9725	99.8234	99.412	98.6113	97.8868	97.198	96.5855	96.2628	96.1947	96.209	96.2605	96.3842	96.9446	97.7321	98.6317	99.5635	100.54	101.608	102.682	103.67	104.479	105.139
11	1	43.6647	43.5675	43.399	43.1126	42.6974	42.2169	41.5811	40.9382	40.2886	39.3016	38.1225	36.523	34.8242	33.0704	31.4518	29.8908	28.4201	27.1227	25.9368	25.1028	24.4311	23.9096	23.6701	23.6448	24.1032	24.9835	26.1058	27.7611	29.6003	31.7123	34.0284	36.4503	39.132	42.0073	45.0525	47.9963	50.8951	53.707	56.4453	59.1414	61.7219	64.1342	66.3098	68.2753	70.1442	71.8085	73.2243	74.4331
11	2	53.722	54.9025	56.1379	57.4642	58.8905	60.3681	61.9694	63.5944	65.2424	66.5441	67.6426	68.2926	69.0641	69.8984	70.2319	70.44	70.4516	70.5132	70.6132	70.8517	71.3139	71.9828	73.176	74.3713	75.4102	76.7724	78.3169	80.1477	81.9173	83.5961	85.2419	86.8679	88.4373	89.9617	91.4465	93.1256	94.5468	95.2745	95.6677	95.9125	96.7041	97.1556	97.1287	95.8981	94.0188	90.5004	87.449	84.7869
11	3	64.1173	64.6647	65.3743	66.3521	67.5697	68.8819	70.3027	71.5872	72.7388	73.6322	74.4037	74.9252	75.5607	76.2483	75.9515	75.4939	74.7843	74.8479	75.1228	75.2503	75.3498	75.4233	75.482	75.6095	75.9252	76.7205	77.7844	79.2027	80.4142	81.3186	82.4092	83.5937	85.0015	86.5729	88.288	89.9552	91.4044	92.3203	92.7667	92.941	92.3037	91.7902	91.4507	91.0082	90.4871	89.7112	89.2268	88.9853
11	4	79.8784	80.9595	82.0755	83.2491	84.4321	85.5926	86.5816	87.2857	87.7124	87.7522	87.625	87.1676	86.7335	86.3135	85.9543	85.6245	85.3405	85.1613	85.0616	85.2468	85.7129	86.4388	87.7794	89.3401	91.2972	93.0706	94.7295	95.8201	96.2752	95.7871	95.0084	94.0673	92.6928	90.9829	88.9784	84.6344	80.3004	76.5763	73.344	70.3895	68.1009	66.1977	64.8366	64.3374	64.2811	65.2921	66.5272	67.9489
11	5	67.2286	67.9874	68.7675	69.5829	70.3894	71.1673	71.7728	72.3294	72.8383	73.3196	73.7945	74.2616	74.5159	74.6491	74.8136	74.9826	75.1586	75.3054	75.4205	75.3993	75.3109	75.1603	74.8892	74.5529	74.0798	73.5519	72.9915	72.3254	71.5751	70.7	69.2996	67.6756	65.6468	63.3697	60.8746	58.0421	55.2077	52.4533	49.845	47.3338	45.3835	43.7936	42.7105	42.1771	41.9086	42.235	43.1365	44.5171
[truncated: 78 more columns]

## Sheet: TeTX5.xls
Session	Step	1	2	3	4	5	6	7	8	9	10	11	12	13	14	15	16	17	18	19	20	21	22	23	24	25	26	27	28	29	30	31	32	33	34	35	36	37	38	39	40	41	42	43	44	45	46	47	48
1	1	45.6979	45.4895	45.2811	45.3228	45.4848	45.8508	46.4789	47.2759	48.4686	49.8986	51.3615	52.8517	54.387	55.9848	57.4922	58.5856	59.0327	59.29	58.7098	58.0552	57.0487	55.8815	54.7603	53.7067	52.6935	51.9153	51.1865	51.1137	51.3479	52.0691	53.2722	54.7785	56.4646	58.3236	60.2341	62.223	64.1951	66.1049	67.9509	69.6354	71.0915	72.5178	73.7215	74.9253	75.6666	76.273	76.596	76.6473
1	2	79.3287	80.0256	80.7224	81.3424	81.9254	82.548	83.2343	83.9897	84.9715	86.0891	86.8471	87.3071	87.609	87.7776	87.8243	87.7601	87.5296	87.3151	87.1709	87.0117	86.6659	86.2348	85.8558	85.5531	85.3435	85.6995	86.1746	86.6733	87.183	87.6525	88.0715	88.4592	88.8294	89.1929	89.7657	90.6577	91.4198	91.7725	91.7962	91.2086	89.7843	88.615	89.349	90.083	88.6783	86.6498	85.239	84.5233
1	3	59.535	60.1572	60.7794	61.5618	62.4212	63.3866	64.4847	65.603	66.619	67.5735	68.3355	68.9381	69.4176	69.7627	69.9956	70.1515	70.1897	70.2179	70.2027	70.2091	70.4567	70.8145	71.1613	71.4918	71.7567	71.6108	71.3784	70.4892	69.2925	68.3456	67.7813	67.0556	65.3808	62.7836	59.6963	55.8621	52.0789	48.6135	45.4509	43.0002	41.5582	40.2774	40.1995	40.1215	40.3095	40.5751	42.128	44.9748
1	4	86.7549	86.0263	85.2977	84.443	83.5275	82.9546	82.8779	82.9058	82.685	82.3149	82.0137	81.7696	81.9344	82.7465	83.9859	85.2415	86.4773	87.2716	86.1193	84.9033	83.9837	83.1994	82.4263	81.6695	80.8545	79.6655	78.3977	76.8264	75.1131	73.5619	72.2423	70.7576	68.5157	65.5504	62.4566	59.1671	55.908	52.7754	49.8134	47.3848	45.7181	44.2538	44.3005	44.3471	46.021	48.1696	50.735	53.6691
1	5	68.2575	68.4203	68.5832	68.8769	69.2335	69.6726	70.2146	70.8561	71.8064	72.9422	74.1219	75.338	76.5857	77.8699	79.1901	80.5491	81.9621	83.3252	84.4682	85.5826	86.5108	87.354	87.8811	87.9432	88.0507	88.5888	89.2175	90.078	91.0469	91.9706	92.8098	93.5224	94.0041	94.261	94.3883	94.318	94.1816	93.9275	93.6052	93.2383	92.8081	92.3654	91.8294	91.2934	90.5885	89.8342	89.3406	89.1164
1	6	73.9082	74.7739	75.6396	76.5425	77.4635	78.41	79.3886	80.4022	81.5304	82.7273	83.9093	85.0789	86.2286	87.3507	88.4059	89.3064	89.9703	90.6108	91.1484	91.6724	92.1078	92.5028	92.9181	93.3635	93.8098	94.2531	94.6958	95.1153	95.524	95.8704	96.1468	96.3744	96.563	96.7125	96.8145	96.8444	96.7558	96.3858	95.8361	95.0975	94.0836	92.9231	90.6684	88.4137	86.0545	83.665	81.1414	78.4856
1	7	79.1136	79.5347	79.9558	80.2185	80.405	80.422	80.2164	79.8656	79.1717	78.2719	77.0336	75.5148	73.7737	71.7863	69.6217	67.4049	65.1167	62.9067	61.0414	59.1724	57.0961	54.9251	53.0704	51.6809	50.2966	48.8031	47.2866	45.5997	43.8331	42.0586	40.2982	38.5849	36.9808	35.5032	34.5084	34.2492	34.4843	35.7831	37.7598	40.4398	44.1081	47.8231	51.8874	55.9517	60.0685	64.2006	68.2842	72.3172
1	8	46.5059	46.3717	46.2376	46.2033	46.217	46.3056	46.4894	46.7343	47.1215	47.5941	47.9059	48.0845	48.579	49.6493	51.1078	52.6065	54.1628	55.6857	57.0617	58.4296	59.7868	61.139	62.5328	63.9878	65.3301	65.9398	66.3952	66.9966	67.6663	68.3332	68.9769	69.5186	69.8146	69.8794	69.9798	70.1345	70.1475	69.7883	69.0873	67.6161	65.0597	62.4076	59.0416	55.6757	52.3735	49.0899	45.9071	42.8242
2	1	88.7801	89.7826	90.7853	91.7888	92.7969	93.8104	94.8335	95.8769	96.9471	98.1001	99.2159	100.301	101.265	102.136	102.936	103.63	104.216	104.673	105.043	105.376	105.607	105.771	105.888	105.946	105.95	105.928	106.011	106.112	106.249	106.175	105.84	105.302	104.565	103.631	102.099	100.465	98.7444	96.0787	92.736	89.1734	85.7204	83.1673	81.7003	80.2973	78.9342	77.7819	76.7374	75.72
2	2	79.1985	78.6238	78.0399	77.4371	76.9893	76.731	76.7662	77.2377	77.7389	78.1966	79.253	80.8056	82.5373	84.2725	85.8507	87.1086	88.0169	88.5032	88.3855	88.0789	87.6874	87.2073	86.594	85.7254	84.448	82.9713	82.7785	82.7949	83.241	83.3537	82.901	81.5254	78.851	76.6425	76.4157	77.0229	78.3209	79.8092	81.2691	82.5472	83.5382	84.4116	85.1431	88.2382	91.9515	94.7545	96.7634	98.1278
2	3	41.0053	41.7705	42.5681	43.4319	44.4562	45.6418	47.0379	48.7409	50.5775	52.7601	54.9784	57.2263	59.4964	61.7758	64.052	66.3236	68.6067	70.9034	73.2759	75.6582	77.9096	80.0474	82.0797	83.8986	85.3605	86.6486	87.6597	88.6351	89.537	90.3836	91.1951	91.8956	92.3554	92.6078	92.2453	91.3449	89.9989	88.6378	87.3553	86.1215	85.1603	85.0669	86.0208	87.1101	88.2391	89.3609	90.3534	91.0969
2	4	45.5348	45.9294	46.4349	47.1678	48.1382	49.295	50.455	51.4237	52.3846	53.3824	54.4124	55.4692	56.8382	58.3884	59.797	60.879	61.7003	62.2068	62.6945	63.1491	63.3215	63.2388	62.8984	62.3395	61.7844	61.231	60.2122	59.0038	57.4065	55.4008	53.074	50.5404	47.895	45.2139	42.4493	40.2704	38.5767	37.2776	36.2145	35.4094	35.1894	36.0436	38.1942	41.36	44.9484	49.751	55.0394	60.2421
2	5	85.4677	86.7868	88.0795	89.318	90.4867	91.5956	92.6224	93.5225	94.3507	94.9801	95.2546	95.2351	94.9809	94.6012	94.1381	93.5834	93.0033	92.3924	91.7583	91.115	90.4489	89.5514	88.2033	86.3887	84.3365	82.1684	79.3077	76.4389	73.5532	70.5804	67.5121	64.0329	59.8011	55.7292	52.4379	49.5538	47.0072	45.7596	45.4498	45.6741	46.5488	47.9828	50.092	52.7732	55.6617	58.9192	62.5795	66.7462
2	6	60.2149	62.5919	64.222	64.3187	64.0577	63.9998	63.9864	63.8795	63.9066	64.4124	64.9127	65.4085	66.2676	67.3171	68.0683	68.3481	68.7025	69.147	69.4554	69.7434	70.2378	70.6662	70.7616	70.6397	70.7105	70.8751	71.1001	71.171	70.9259	70.5508	70.1516	70.1275	70.989	72.1353	73.9442	75.9251	78.0485	80.0983	82.0608	83.9655	85.7691	87.4095	88.8529	89.6374	90.1508	89.9077	89.138	87.9653
2	7	59.5397	60.5943	61.6099	62.5452	63.4289	64.2848	65.1378	66.0143	66.89	67.7558	68.4414	68.9775	69.3549	69.6568	69.9925	70.3939	70.773	71.1254	71.5806	72.077	72.6809	73.3541	74.074	74.8202	75.5278	76.2167	76.7268	77.1817	77.5231	77.7746	77.9666	77.8759	77.2215	76.469	75.5729	74.7411	73.9627	73.0831	71.9857	70.1938	67.3769	64.2677	60.8057	57.4625	54.2676	52.2262	50.9487	50.1598
3	1	60.0643	61.6921	63.3199	65.3037	67.5702	69.716	71.2585	72.0841	72.8794	73.0384	73.1841	73.2494	73.2544	73.2419	73.239	73.2467	73.2407	73.0975	72.9479	72.6889	72.3491	71.9483	71.4506	70.8545	70.2553	69.6366	69.0163	68.6575	68.4893	68.3843	68.3004	68.2359	68.1639	68.0583	67.9491	67.9848	68.1261	68.2968	68.4753	68.6602	68.9404	69.5487	70.2023	71.2606	72.6183	74.0749	75.6571	77.3295
3	2	53.7727	54.2392	54.7058	55.2057	55.7322	56.3068	56.9846	57.785	58.6013	59.7513	60.9082	62.0123	63.0757	64.0724	64.9269	65.624	66.2732	66.4428	66.5901	66.4833	66.1894	65.8363	65.4882	65.1452	64.7905	64.3611	63.9258	63.3605	62.7004	61.9839	61.1837	60.3068	59.4305	58.5573	57.6844	57.0453	56.5766	56.2524	56.2463	56.5005	56.7936	57.2214	57.6677	57.9053	57.9885	57.8304	56.9552	55.5639
3	3	48.8334	48.2294	47.6254	47.1627	46.8122	46.5614	46.4687	46.5639	46.6795	47.2221	47.7735	48.6213	49.6939	50.8627	52.0788	53.3471	54.6003	55.7021	56.7969	57.7526	58.6056	59.3803	60.0294	60.5514	61.0152	61.111	61.1777	61.0687	60.8316	60.6031	60.5105	60.5426	60.5523	60.4608	60.3585	59.7041	58.6468	57.5075	56.4318	55.4081	54.1977	52.3435	50.4004	48.2828	46.0359	43.7891	41.6343	39.5459
3	4	72.5988	71.9508	71.3028	70.6787	70.0735	69.4676	68.8413	68.1907	67.5455	67.0145	66.486	65.9678	65.4573	64.9201	64.3029	63.5975	62.8871	62.1284	61.3674	60.7248	60.1698	59.683	59.307	59.0433	58.8157	58.8168	58.836	59.1752	59.748	60.5242	61.6963	63.2316	64.8624	66.925	69.0342	71.0365	72.9608	74.9474	77.1923	79.6486	82.019	84.0938	86.1277	88.1704	90.2196	92.1414	93.6214	94.7835
3	5	62.4532	63.1115	63.7698	64.3008	64.7307	65.0353	65.1022	64.8867	64.6999	65.1172	65.547	65.7312	65.7275	65.7723	66.127	66.8244	67.5823	68.9458	70.3376	71.7645	73.2164	74.5072	75.325	75.6633	76.0169	76.4677	76.9262	76.976	76.7278	76.3941	76.0663	75.744	75.434	75.1799	74.9319	74.8695	74.9425	74.9058	74.4162	73.5559	72.2177	69.2316	66.018	61.8137	56.8762	52.1126	48.4669	45.626
3	6	59.7612	59.7997	59.8382	59.8697	59.8956	59.9021	59.8622	59.7669	59.6704	59.5483	59.4258	59.3712	59.3683	59.254	58.7882	57.934	57.1547	57.1244	57.129	56.7386	56.0549	55.0972	53.6414	51.6806	49.6154	46.8881	44.1086	41.6883	39.5301	37.7936	37.0695	37.2737	37.5934	38.4358	39.3346	40.8103	42.707	44.9411	47.9001	51.4521	55.1841	59.5368	63.9752	67.9954	71.7061	75.1958	78.1483	80.7141
4	1	50.0768	51.671	53.2714	55.0118	56.8143	58.7208	60.7576	62.8869	65.2993	67.6212	69.4265	71.1342	72.6547	74.0493	75.3457	76.5017	77.5859	78.483	79.4678	80.645	81.8846	83.1691	84.4128	85.4715	86.3032	87.1151	87.8918	88.5743	89.1361	89.5595	89.8268	89.9951	90.1802	90.3673	90.2631	89.9183	89.1201	87.9305	85.8697	82.7509	78.8138	74.059	68.8025	64.1451	59.7594	56.3856	53.7652	53.6748
4	2	75.1875	76.433	77.6641	78.5686	79.3318	79.8849	80.2011	80.5116	80.8064	81.145	81.7345	82.2398	82.2992	82.1427	82.0617	82.0773	82.0953	82.1194	82.1927	82.3738	82.4478	82.2406	81.5182	79.9188	77.2443	74.4808	71.5581	69.1333	67.3463	66.0795	65.3034	64.8862	64.5451	64.2627	63.6973	62.8985	62.1212	61.3848	61.3644	62.3736	64.2009	66.9028	70.1412	73.8473	77.7655	81.455	84.9315	87.7937
4	3	58.5169	60.1591	61.8073	63.5923	65.4219	67.1839	68.8541	70.4135	71.6234	72.7086	73.0806	73.3386	73.4227	73.4179	73.4255	73.4775	73.6606	74.186	74.9247	76.1306	77.3641	78.438	79.214	79.4778	79.0393	78.0791	76.1852	74.0798	71.7034	69.5777	67.9888	66.9535	66.439	66.4154	66.3361	66.2111	65.7408	64.96	63.9193	62.6732	61.5862	61.4919	62.0067	64.0341	66.7477	70.4065	74.7017	78.7389
4	4	68.0696	68.2129	68.358	68.5439	68.745	68.9459	69.1394	69.2822	69.2653	69.1866	68.7554	68.2217	67.4135	66.4689	65.5581	64.6258	63.3964	61.3921	58.9205	55.4251	51.4347	46.8571	41.9522	37.1954	32.8016	29.5716	28.4239	27.9917	28.4757	29.4642	30.774	32.3478	34.0505	35.8817	37.8478	39.9253	42.2948	44.9204	47.8992	51.2514	54.9718	59.2681	63.9177	68.6248	73.3578	77.8515	82.1527	86.1933
4	5	66.1159	67.3735	68.6356	70.0028	71.3849	72.5073	73.3101	73.9172	73.9132	73.8197	73.2149	72.5794	72.0277	71.6008	71.4688	71.7378	72.1247	72.8193	73.5355	74.2991	75.0247	75.6465	76.1788	76.6538	77.0674	77.5311	78.0844	78.7517	79.565	80.2306	80.5867	80.7471	80.9425	81.1717	81.4166	81.6744	80.7745	78.8181	75.8856	72.1193	68.0785	64.7351	61.8194	60.4382	59.7531	59.5422	59.5954	58.7319
4	6	78.9542	78.4699	77.9975	77.797	77.7125	77.7855	78.0233	78.1788	78.0738	77.8553	76.9882	75.9937	74.7433	73.4037	72.2341	71.3126	70.5364	70.1394	69.6664	69.027	68.2427	67.2241	66.0253	64.7546	63.4165	62.2023	61.2099	60.0387	58.6385	56.8561	54.5888	51.7197	48.1043	43.7992	39.8564	36.2127	33.6619	32.0804	31.6292	32.2885	33.7536	35.884	38.4226	40.676	42.8001	45.5784	48.8918	52.5476
4	7	67.3502	67.3251	67.3268	67.9445	68.8189	69.9852	71.4773	72.9578	74.397	75.7261	76.4255	77.0371	77.5472	78.0025	78.4551	78.8911	79.2675	79.4888	79.8409	80.4795	81.4856	83.1493	85.325	87.7189	90.3145	92.513	94.001	94.9133	95.0883	95.0069	94.9037	94.769	94.5891	94.3743	94.3249	94.4122	94.9708	95.9466	97.088	98.2353	98.3461	94.691	88.7253	80.8208	72.0367	65.3084	60.335	58.0989
5	1	77.8093	77.8963	77.9833	78.1024	78.2504	78.3977	78.4992	78.5342	78.5297	77.6938	76.6913	75.6714	74.6507	73.627	72.562	71.4286	70.2691	68.8484	67.2812	65.6871	64.0413	62.3734	60.526	58.4013	56.2168	53.9569	51.6015	49.2806	47.2696	45.3728	43.5694	41.9067	40.3297	38.8769	37.7179	36.5589	35.5971	34.7088	33.6094	32.1433	30.4081	28.5968	26.4511	24.3054	22.4434	20.728	19.0936	17.5532
5	2	65.4277	66.0285	66.6292	67.1496	67.5979	68.0405	68.5707	69.2277	69.895	70.7764	71.7007	72.5986	73.4548	74.2871	75.0308	75.6288	76.2777	77.4353	78.8776	80.2023	81.1876	82.0282	82.5902	82.7218	82.7769	82.8184	82.8428	82.9136	83.4016	84.0435	84.113	83.3203	82.0494	80.2577	77.2339	74.2102	72.153	70.456	68.9869	67.8253	66.8726	65.8806	64.7154	63.5503	62.959	62.6639	62.9365	64.304
5	3	70.9022	72.6987	73.7037	74.9557	76.2216	77.468	78.7044	79.7147	80.576	81.1636	80.9293	80.7721	80.7798	80.1143	78.697	77.42	76.6383	75.3837	73.7578	73.6371	73.85	73.8866	73.8413	73.9706	74.3343	74.7727	74.987	74.1691	73.2274	72.3089	71.2776	69.7599	67.5389	65.5384	64.9178	62.4544	56.4803	50.2561	46.3047	43.885	41.453	41.3823	45.994	51.663	57.7296	63.8891	69.7238	75.1717
5	4	45.3209	45.8001	46.2603	46.2854	46.1855	46.4829	47.2483	48.1661	49.5569	50.9535	52.3831	53.955	56.0944	58.612	61.4134	64.4909	67.1766	68.8406	70.4829	72.0779	73.6609	75.24	76.6407	77.5758	77.9119	78.0219	77.7275	77.7481	78.1721	78.4861	78.4165	78.0287	77.4795	76.7802	76.1439	75.5596	75.1327	74.8443	74.5938	74.3199	74.0499	73.841	73.6696	73.8466	74.1815	74.3405	74.3363	74.1282
5	5	67.2252	66.4822	65.7392	65.2194	64.8286	64.6936	64.9324	65.3743	65.7129	65.8847	66.1758	66.8845	67.7125	68.7607	70.0289	71.2289	72.1898	73.0823	73.7712	74.334	75.1862	76.5638	78.2016	79.6132	80.6336	81.654	81.4338	81.2136	81.2495	81.4334	81.9519	82.968	84.141	84.624	83.9921	82.8198	79.7561	76.1521	75.0768	76.5304	77.4408	76.4502	74.9166	74.0461	73.5862	73.2368	72.9314	72.9966
5	6	42.1288	42.7411	43.3533	43.851	44.3021	44.9377	45.8081	46.6679	47.3775	48.0653	48.2597	48.3319	48.2409	48.0438	47.3229	45.6408	43.6187	41.223	38.6899	36.6737	34.9573	34.0609	34.0516	34.5142	35.1963	36.0166	38.533	42.0566	46.2794	51.0561	55.7519	59.8487	63.3956	66.4723	68.9913	71.6314	74.4123	76.9042	78.8355	80.2194	81.1146	81.4358	82.2939	84.2796	86.3291	88.4008	90.498	92.6431
6	1	65.1409	65.0706	64.9274	64.6625	63.7372	62.1966	60.4477	58.7438	57.0931	55.518	54.0447	52.6272	51.3303	50.1215	48.9584	47.8449	46.7996	45.8725	45.3378	44.9328	44.6189	45.0588	46.1699	47.4343	48.8099	49.9784	51.0214	52.0562	53.0917	54.1305	55.1706	56.2098	57.2476	58.2805	59.2859	60.2588	61.1654	62.0773	63.1482	64.4236	65.8364	67.3637	68.8869	70.409	71.9295	73.312	74.5559	75.7059
6	2	51.7632	50.3097	48.9672	47.8095	46.8219	45.9244	44.8986	43.703	43.2103	43.7191	44.9059	46.2351	47.2221	48.0446	48.9416	49.9054	50.9133	51.9277	52.9366	54.0147	55.1497	56.3067	57.4589	58.5901	59.9228	62.7165	66.3978	70.2758	74.1555	77.9842	81.2048	83.6044	85.8816	88.8227	92.0742	95.6905	98.381	100.423	101.554	101.773	101.499	100.797	99.9278	99.4192	99.9795	100.961	102.131	103.039
6	3	65.1441	65.2202	65.1901	64.9831	64.8323	64.8051	64.8958	65.102	65.1803	65.0766	65.0675	65.1608	65.6183	66.3872	67.3593	68.4418	69.3763	70.0728	69.9858	69.1869	67.8347	67.1778	67.3451	67.7104	68.2541	68.7221	69.141	69.3715	69.7039	70.2654	71.4502	73.3209	75.142	75.8748	76.1453	75.8728	75.4984	75.1565	75.0652	75.2974	75.7606	76.4005	76.8744	77.299	77.6509	77.8219	77.8265	77.0183
6	4	65.0924	66.0328	66.9698	67.9011	68.7806	69.6091	70.408	71.1723	71.8741	72.4867	72.8146	72.9182	72.345	71.4365	70.5597	69.7335	69.0016	68.2728	67.4933	66.6677	65.8065	65.3113	65.2343	65.4393	66.0045	66.6006	67.2161	67.8624	68.7123	69.9075	71.4019	73.0077	74.2689	74.1844	73.8729	73.295	72.5989	71.8553	71.0897	70.0656	68.4652	66.3761	64.2227	62.0524	59.8596	57.6954	55.5649	53.6976
6	5	66.1052	67.0295	67.9363	68.8138	69.6697	70.5171	71.3886	72.3154	73.2504	74.1973	75.0804	75.9164	76.6164	77.2055	77.726	78.189	78.6248	79.0498	79.4533	79.6562	79.6954	79.4807	79.0647	78.5542	77.9498	77.4616	77.0359	76.1655	74.9953	73.4258	71.1666	68.2495	65.3169	63.1928	61.1377	59.1635	57.1824	55.0508	52.2625	49.0594	46.2238	43.8187	42.6423	42.6203	45.329	48.4057	51.2543	54.1113
6	6	44.8982	47.3542	49.8524	52.421	55.2797	58.3269	60.7118	61.6509	62.5138	63.2679	64.1026	64.874	65.2046	65.0919	64.632	63.9156	63.1831	62.4633	61.8015	61.1484	60.5002	60.3101	60.5665	60.9883	61.5589	61.8947	62.1013	63.0371	63.7501	63.8749	63.4058	62.5392	61.5422	60.6427	60.3343	60.7203	61.1854	61.7605	62.8172	63.6076	62.8037	60.972	62.2067	63.0112	61.4275	59.2264	56.9334	54.8259
6	7	47.3051	48.0881	48.9067	49.7847	50.587	51.2899	51.9187	52.5444	53.5113	54.9641	57.8797	61.2462	64.5906	67.8519	71.0803	74.0814	76.3714	78.4653	80.3052	81.5175	82.2248	81.8727	80.7435	79.5679	78.4226	77.34	76.2964	75.3107	74.4765	73.8901	73.441	72.9867	72.4598	71.6819	70.7605	69.6706	68.454	67.409	67.3828	67.8791	67.4939	66.6402	68.479	70.9011	73.8974	76.37	78.1934	79.2557
7	1	72.9622	71.6213	70.2803	70.3713	71.1509	71.7452	71.9299	72.0017	72.1554	72.3582	72.7521	73.3042	73.8942	74.4792	75.173	76.2205	77.7887	79.2066	79.9612	80.7905	82.7059	85.1173	87.2989	89.1427	90.559	89.3712	87.6352	86.1043	84.6694	83.6822	83.1922	82.7462	81.7558	80.2078	77.7801	74.0119	71.031	70.3803	70.5958	69.2589	65.7695	62.561	61.4496	60.3381	56.4934	51.8514	50.7319	53.2663
7	2	59.0078	58.6856	58.3635	57.9817	57.5712	57.289	57.1939	57.2255	57.5677	58.0963	58.8065	59.6672	60.7129	61.9985	63.5058	65.2192	67.2281	69.0708	70.1806	71.1831	71.445	71.3688	71.0649	70.4262	69.6449	68.0639	66.3146	64.4635	62.5649	60.9382	59.6446	58.5706	57.6484	56.8687	56.0617	55.2129	54.5422	54.3321	54.4885	55.3133	57.0705	58.7792	60.1258	61.4723	62.3344	63.0553	64.5776	66.9269
7	3	58.7204	57.7602	56.8	56.0494	55.3995	55.149	55.4401	56.0572	57.3845	59.1379	61.2059	63.5348	65.5426	66.9124	67.8655	68.8173	69.7686	70.7367	71.7794	72.8217	73.8235	74.8068	75.4359	75.5442	75.4939	74.5979	73.524	73.1373	73.0723	73.3718	74.0048	74.7511	75.3593	75.8225	75.9927	75.7161	75.2652	74.4863	73.6286	73.2061	73.4066	73.795	75.5853	77.3756	80.0077	82.8852	84.899	86.0111
7	4	56.5715	55.2027	53.834	52.8325	52.0078	51.4178	51.1206	50.9914	51.2075	51.6307	52.4204	53.5136	54.9407	56.7874	58.9128	61.0539	63.2158	65.3473	67.3447	69.3158	71.0828	72.7566	74.2328	75.418	76.5944	77.8032	79.0188	80.2388	81.4609	82.4435	83.1448	83.4908	83.2484	82.4676	82.0926	82.3357	82.4985	82.3016	81.9157	81.4931	81.0199	80.5574	80.1748	79.7922	79.4076	79.0224	78.9058	79.061
8	1	55.3296	55.4647	55.5781	55.6552	55.9317	56.4352	57.1752	58.1802	59.0202	59.6248	60.0712	60.2297	59.1976	57.5005	55.7512	54.1647	53.2531	52.2742	50.5972	49.2201	48.1163	46.9873	45.8189	44.8381	44.2428	44.3698	44.9305	45.284	45.7778	46.5725	47.5298	48.4923	49.5047	50.6979	52.2208	54.1309	56.4482	58.7531	60.2134	60.7293	60.8531	60.6688	60.6841	61.1361	62.7247	64.4306	66.0052	67.6479
8	2	41.5976	45.0319	48.3092	51.3251	53.8945	56.0706	57.7543	58.6593	59.0934	58.8565	57.5054	55.9202	54.8974	54.2232	53.5605	52.7099	51.1752	49.4627	47.546	46.7017	46.7453	46.3846	45.4044	44.3836	43.5039	43.4489	43.9231	46.1179	49.0322	52.7256	56.7401	60.6554	64.9089	70.4329	75.4018	79.7189	83.2948	86.5051	89.4893	92.4227	95.5424	98.6826	100.47	101.986	103.273	104.465	105.608	106.624
8	3	76.4642	74.5781	73.3901	73.3656	73.526	73.4788	73.3747	73.2831	73.0709	72.6866	73.5964	74.7655	75.2193	75.0943	74.7166	73.9243	72.3372	70.676	69.268	67.4612	65.3174	63.6527	62.658	62.1465	62.313	62.8861	63.7003	64.2326	64.807	65.5321	65.6245	64.6559	63.1336	61.0909	59.1629	57.3697	55.5261	53.5986	51.4237	49.6275	49.1981	49.9116	50.6149	51.6491	53.6074	55.9263	58.4049	61.0344
8	4	58.722	58.7701	58.8672	59.0459	59.3258	59.6581	59.8119	59.5809	59.3578	59.1458	58.9811	58.852	58.8281	58.9444	59.2062	59.6728	60.4878	61.4041	62.4641	63.5373	64.6155	65.678	66.7744	68.0182	69.4215	70.5293	71.4367	71.1053	70.6552	70.3387	70.1158	69.9221	69.7267	69.4568	68.5481	66.889	64.7585	62.4019	59.8592	57.8211	57.2413	57.9959	59.891	61.8058	63.3315	64.6236	65.7679	66.8958
8	5	56.3707	56.9298	57.5496	58.2706	59.0706	59.9142	60.7663	61.5279	61.9244	61.8007	61.7408	61.7251	61.8308	62.0367	62.3062	62.643	63.0553	63.4958	63.9904	64.5612	65.1924	66.5836	68.5297	70.2363	71.4995	72.508	73.3592	74.034	74.902	76.1548	77.2522	77.7901	77.9001	77.2473	76.2652	74.8961	75.0343	75.9224	76.9335	77.7656	78.2884	78.4622	77.7363	77.1443	77.2743	77.7195	78.3219	79.0105
8	6	72.3334	71.8042	71.2749	70.7456	70.1464	69.4758	68.7628	67.9889	67.0739	65.9579	64.6082	63.1858	61.7632	60.3646	58.9927	57.6454	56.3239	55.0819	54.1169	53.1652	52.2134	51.929	52.2644	52.7414	53.3971	54.3435	55.4709	56.889	58.4291	60.1016	62.007	64.1467	66.3726	68.5888	70.7746	72.9246	75.071	77.2549	79.61	82.1224	84.6524	87.1496	89.1725	91.0603	92.7571	94.2875	95.6916	96.8818
8	7	74.9258	74.847	74.7869	74.758	74.7655	74.8028	74.8911	75.0048	74.8623	74.3548	73.4219	72.3471	71.2246	69.9839	68.5592	66.929	65.0408	63.0299	60.7357	58.0756	55.1264	51.8451	48.4649	45.3902	42.7505	40.0397	37.2867	34.5829	32.1939	30.3394	28.9621	27.8754	27.0349	26.7033	27.1778	28.599	30.38	32.332	34.4984	36.9823	39.8288	43.0308	46.7559	50.6008	54.5754	58.3378	61.8585	65.0025
9	1	59.9172	59.5107	59.0959	58.651	58.1304	57.4877	56.6536	55.5686	54.2974	52.8219	51.2937	49.7926	48.281	46.6856	45.0237	43.379	41.8641	41.4319	41.8441	42.5199	43.3007	44.4618	46.0236	48.0654	51.0275	54.2831	58.1411	61.5902	64.7014	66.8086	68.0656	69.0097	69.8602	70.6868	71.4196	71.2978	69.7071	67.7687	65.9036	64.3767	63.4391	62.7601	62.41	62.0346	61.3769	60.0919	57.6172	55.0605
9	2	71.4509	72.984	74.5391	76.1735	77.9527	79.9506	82.0977	84.2031	86.2749	88.253	90.2069	92.3517	94.5739	96.8725	99.2942	101.879	104.67	107.471	110.278	111.544	112.084	112.249	112.165	111.681	110.397	108.7	106.157	102.806	98.7881	94.5253	90.2226	85.8915	81.5103	77.0322	72.0701	67.108	62.1461	57.7504	54.0558	50.8995	48.0605	45.4846	44.3239	43.5641	44.5081	46.4226	49.5926	53.5853
9	3	61.1932	61.5727	61.9552	62.3488	62.7448	63.138	63.5215	63.8858	64.2604	65.1379	66.1451	67.1533	68.1489	69.1074	70.0187	70.8879	71.6927	72.3838	72.9863	73.5137	74.0076	74.3149	74.3736	73.9631	72.6516	71.1175	69.1265	67.0433	64.884	62.7201	60.5738	58.6116	57.0475	55.5674	54.3955	53.4278	52.8114	52.5976	52.7619	53.5851	55.3062	57.4112	59.9152	62.4687	65.1384	67.7966	70.3769	72.907
9	4	79.2965	79.4522	79.6745	80.1358	80.6907	81.2606	81.8049	82.2551	82.589	81.8678	80.8744	79.3288	77.6262	75.939	74.2723	72.6161	70.9746	69.3454	67.726	66.3249	65.0261	64.6088	64.9229	65.2499	65.5441	65.8499	66.1794	66.4842	66.7683	67.0591	67.3619	67.6476	67.8866	68.1144	68.2998	68.5433	68.8864	69.3076	69.7912	70.2976	70.7828	71.2638	71.7839	72.3435	73.1123	73.9572	74.8652	75.7111
9	5	55.2286	55.429	55.6284	55.824	56.0709	56.417	56.9206	57.6332	58.504	59.6103	60.7774	62.1491	63.6292	65.3065	67.2217	69.3295	71.6773	73.9966	76.2937	77.6051	78.4533	78.8279	78.8864	78.8961	78.8344	78.7419	78.5863	78.0096	77.0847	75.7917	74.2511	72.5055	70.4809	68.409	66.1813	63.9731	61.7987	59.5117	57.0739	54.4383	51.5731	48.6559	46.0983	43.7834	42.7084	42.1561	42.1297	42.5743
9	6	55.6362	55.228	54.6763	53.6087	52.4803	51.5851	51.8433	54.5824	59.0384	62.917	66.6467	70.4639	74.403	78.7174	83.1835	87.1731	90.4062	92.0837	92.5479	93.4035	94.4705	95.0242	95.102	95.206	95.388	95.5097	95.5075	95.2029	94.6482	93.0155	90.4375	87.3483	83.8429	80.5424	78.4296	76.6186	75.3265	74.5027	74.0807	74.5308	76.2741	78.4393	79.8673	81.005	80.7883	80.5243	80.7887	80.6498
9	7	95.6206	96.2305	96.8352	97.4211	97.9931	98.5514	99.0853	99.5834	100.055	100.49	100.916	101.302	101.653	101.911	101.923	101.475	100.396	98.8157	96.8436	94.7059	92.499	90.2256	87.9041	85.5537	83.1447	80.6863	78.1266	76.0852	74.4721	73.4316	72.8084	72.9806	74.5368	75.8549	75.5087	74.847	73.643	72.6343	72.0532	71.6486	71.1377	70.5659	69.792	68.9219	67.5855	66.1807	64.8478	63.7691
10	1	75.3974	75.3948	75.4581	75.5935	75.9385	76.4869	77.1894	78.0609	79.0722	80.165	81.3619	82.6287	83.9622	85.3944	86.9765	88.7209	90.5569	92.5061	93.675	94.49	95.0292	95.1731	94.933	94.4073	93.6166	92.6914	91.7572	91.6775	91.9023	92.3172	93.2553	94.8335	96.7301	98.9519	101.666	100.991	96.3608	89.6454	81.7039	72.4692	62.4324	53.603	45.4034	38.0702	36.9737	38.8856	42.3605	47.4283
10	2	80.3381	80.6643	80.99	81.3151	81.6331	81.9286	82.1857	82.3502	82.2591	82.084	81.8289	81.3738	80.83	80.2664	79.7003	79.0703	78.1581	76.5117	74.1973	71.6674	69.2226	66.8853	64.7359	63.3338	63.4237	63.9422	65.0052	68.2384	72.0221	76.0033	79.6535	82.7836	85.8501	88.7805	90.1179	91.4186	92.7227	94.08	95.4626	96.8327	98.1667	99.4242	100.635	101.778	102.796	103.711	104.479	105.062
10	3	47.8807	47.4473	47.095	46.8322	46.8913	47.2168	47.6672	48.7395	52.1706	56.3001	61.035	64.5996	66.9759	67.7669	67.4853	67.2668	67.0031	66.5569	66.4204	66.4688	66.7898	67.2996	67.881	68.3726	68.6176	68.9629	69.4012	70.0209	70.5931	71.0712	71.0697	70.6621	70.5658	70.8056	71.9104	73.2597	74.8684	75.9478	76.581	77.0396	77.1686	76.5948	76.0186	75.7171	75.1398	74.4531	73.7722	72.8722
10	4	72.7074	72.8969	73.0085	73.0342	72.9881	72.9075	72.8206	72.691	72.3882	72.1397	72.026	72.0841	72.2621	72.5665	73.0134	73.5317	73.8988	73.7798	73.5242	73.2006	72.8062	72.3183	71.7367	71.0472	70.1972	69.23	68.1581	66.914	65.5596	64.1068	62.2535	60.2612	59.045	58.5734	58.2985	57.4803	56.0249	52.5137	47.6907	42.5179	37.6583	34.6994	33.2733	34.3698	37.1416	40.5938	44.248	48.0042
10	5	83.6104	84.1356	84.633	85.0997	85.5133	85.9016	86.3024	86.7236	87.1735	87.6455	88.1479	88.5346	88.806	88.9231	88.7756	88.2862	87.5152	86.2572	84.7565	83.0882	81.1227	79.2811	77.7733	76.6	75.9475	76.0792	76.775	77.34	77.7721	78.07	77.7974	76.9298	76.0985	75.3004	74.4719	73.2734	71.6456	69.5509	67.1391	64.5065	61.8462	59.7129	57.5828	55.25	52.6882	49.8497	46.5226	43.3809
10	6	65.7545	67.7631	69.9115	72.2134	74.5999	76.9715	79.2556	80.9694	80.468	79.2129	77.2234	74.9359	72.6555	70.6139	69.6234	70.2927	71.5364	72.9255	74.0923	75.0386	75.4667	74.9036	73.3959	71.4006	69.293	67.3488	65.595	64.5062	65.1046	67.329	70.3865	73.4272	76.0383	78.1428	78.1533	77.1196	74.9327	73.1756	72.1012	71.5256	71.5377	72.098	72.3123	71.5677	68.6474	64.5629	59.6107	54.3457
10	7	46.4485	47.539	48.6478	49.7768	50.9388	52.1425	53.3959	54.7084	56.0785	57.4673	58.8735	60.1726	61.3508	62.3515	63.3541	64.7689	67.0155	71.2283	76.2182	81.4659	86.6404	91.0028	94.2885	96.2484	96.3222	95.923	95.1642	94.2999	93.3838	92.4369	91.6152	91.048	90.7244	90.7844	94.0493	97.222	100.195	102.461	103.618	103.249	100.945	96.6327	91.1266	83.8648	77.7354	72.35	67.6622	63.6271
10	8	67.6838	67.541	67.4409	67.3877	67.4704	67.4976	67.2157	66.5635	65.5999	64.3492	62.688	61.0246	59.4134	57.8872	56.6285	55.7913	55.1917	54.8862	54.465	53.9899	53.4685	52.8775	52.2388	51.663	51.2839	51.0046	50.863	51.3311	51.9766	52.7119	53.6721	54.9615	56.546	58.432	60.7749	63.6046	66.9872	70.5554	74.1115	77.5928	80.8428	83.5229	85.9057	87.8794	89.5232	90.9965	92.3411	93.4506
11	1	47.0921	48.4247	49.7543	51.0147	52.2271	53.2012	53.8814	54.3777	54.3009	54.1723	53.7481	53.3409	53.1243	52.9846	52.7566	52.3995	51.9667	51.3359	50.7521	50.271	49.994	50.1088	50.4207	50.5776	50.5362	50.4281	50.2008	50.1373	50.2835	50.6031	51.0877	51.6774	52.2501	52.8172	53.6039	54.5718	55.9291	57.6251	59.7648	62.3643	65.1104	67.4548	69.5526	71.7205	73.9202	76.2739	78.744	81.1186
11	2	55.9673	55.9361	55.8987	55.7188	55.4863	55.2585	55.0441	54.8879	54.9147	55.002	55.4346	55.9996	56.9648	58.2123	59.717	61.5683	63.5079	65.6782	67.887	70.1803	72.583	75.1816	77.8571	80.3979	82.592	83.6243	82.5773	81.3122	79.7676	77.25	73.3403	68.679	64.5253	60.8545	57.2252	53.63	50.5744	48.0075	45.1186	41.4777	38.0881	37.1338	37.6735	37.7994	37.7376	36.3396	33.9199	31.4789
11	3	52.8165	52.0766	51.3547	51.0471	50.9257	51.1465	51.7684	52.5086	53.6171	54.7558	56.0672	57.5234	59.5005	61.7622	64.0555	66.3644	68.5601	70.4608	71.8784	72.2378	72.0243	71.0719	69.7073	68.5285	67.6143	66.951	66.7364	66.9025	67.5561	68.3435	69.0893	69.8361	70.6625	71.5831	72.901	74.5469	76.5984	78.9899	80.6654	81.0945	80.7971	80.3958	79.9308	77.5168	74.2186	70.1364	65.5757	61.8964
11	4	56.8796	57.3672	57.8564	58.3798	58.9141	59.4287	59.9337	60.5246	61.3837	62.2739	63.3408	64.4496	65.6571	66.9602	68.4219	70.1084	71.9004	73.9675	76.0208	78.0441	79.9031	81.4221	82.7082	83.965	85.2265	86.7409	88.7076	90.3759	91.6619	92.5425	92.9811	92.8732	92.091	90.6295	88.3222	85.3168	82.1773	78.9792	76.1306	73.8294	71.7634	69.4386	66.955	66.4346	66.8048	68.8917	72.1898	76.2123
11	5	58.0591	58.6965	59.3365	60.0352	60.7569	61.492	62.2471	63.038	63.9375	64.7826	65.317	65.7716	66.0274	66.1805	66.3438	66.5112	66.6379	66.6582	66.6582	66.6134	66.5823	66.6015	66.672	66.7915	66.9681	67.131	67.2695	67.4314	67.6236	67.7923	67.9085	67.9449	67.8612	67.6591	67.3637	66.9914	66.491	65.8809	65.138	64.2623	63.3485	62.5668	61.866	61.1668	60.4682	59.911	59.4648	59.1839
12	1	62.5512	62.988	63.4249	63.9854	64.5962	65.2477	65.9468	66.6167	67.1338	67.6288	67.9525	68.2338	68.6367	69.1364	69.7055	70.3639	71.0277	71.4647	71.8183	72.1204	72.3952	72.7285	73.1419	73.6149	74.1579	74.7449	74.1212	72.7786	71.3788	70.0367	68.5867	66.8901	64.9273	62.5802	59.7777	57.2931	55.1783	53.7183	53.2108	53.5534	54.5011	56.2429	58.1521	60.413	62.9363	66.0002	69.4287	73.2668
12	2	65.9343	66.9213	67.9084	68.8688	69.8185	70.6342	71.2825	71.8984	72.4403	72.9715	72.93	72.7466	72.3958	71.9381	71.5102	71.1889	70.9534	71.2398	71.718	72.2416	72.7861	73.6026	74.7406	76.0733	77.5561	79.1335	80.0995	80.7025	80.3057	78.9429	76.9516	74.5824	71.8813	68.9539	65.758	62.3658	58.7454	54.9824	51.0802	47.5689	45.4185	45.0534	45.0632	45.8605	47.1305	49.3588	52.2292	55.8138
12	3	65.54	66.2842	67.0285	67.7219	68.3947	69.1174	69.9042	70.7868	72.0761	73.4242	74.3728	75.2223	76.5314	78.1981	80.2641	82.9356	85.7395	87.9604	89.9671	92.1416	94.4181	96.748	99.1074	101.453	103.717	105.931	107.827	109.533	110.89	111.917	112.535	112.659	112.177	110.573	107.637	104.192	100.153	95.7572	91.0228	85.98	80.7049	75.1449	69.7202	64.5795	59.4164	54.174	49.037	44.3126
12	4	86.625	84.9779	83.3309	81.4904	79.5712	77.5998	75.5678	73.5234	71.4484	69.369	67.2351	65.0878	64.0718	63.906	64.247	65.1749	66.3082	67.6476	69.0627	70.6445	72.3199	74.554	77.4311	80.7072	84.3115	88.1221	90.026	90.7978	90.6996	89.8929	88.6466	87.1627	85.4376	83.4158	81.0422	77.2254	71.7307	66.0428	60.7966	56.2891	53.0309	51.4832	50.9961	52.7362	54.2898	55.1995	56.0514	57.5354
12	5	48.7602	49.6575	50.5549	51.6867	52.9139	54.2454	55.7017	57.0808	58.0566	58.9739	60.0976	61.2724	62.4628	63.6582	64.6366	65.194	65.6521	66.4421	67.354	68.3736	69.4518	70.5112	71.5278	72.4448	73.1241	73.6538	73.6943	73.4444	72.5623	71.0793	69.2604	67.3083	65.3934	64.1341	63.6521	64.129	65.7207	66.1284	63.9931	60.4019	57.4844	55.5034	54.2325	54.4528	55.797	59.4592	64.2319	69.4159
12	6	62.9002	62.6746	62.4489	62.1534	61.8295	61.3362	60.632	59.942	59.4073	58.8952	58.6296	58.4252	58.491	58.7517	59.1531	59.7366	60.3914	61.1862	62.0324	62.911	63.8068	64.7487	65.7406	66.7595	67.792	68.8332	69.9382	71.0812	72.2322	73.3852	74.541	75.7	76.8513	77.9543	78.9998	80.0141	80.9921	82.5374	85.0719	88.3408	91.8205	95.4572	97.9568	98.0686	98.1575	98.4468	99.0324	100.25
13	1	95.0173	94.7006	94.3838	94.0671	93.7288	93.3501	92.9271	92.4694	91.9866	91.4896	90.9889	90.3824	89.7435	89.1037	88.3499	87.2788	85.787	84.0911	82.2359	80.3024	78.3355	76.1727	73.8486	71.5177	69.2117	67.064	65.2412	63.4795	61.7684	59.9749	58.0891	56.056	53.7665	51.4614	49.1562	46.9263	44.8257	42.7681	40.7194	38.9363	37.6674	36.6849	36.597	36.5856	36.6382	37.1593	38.6392	40.7412
13	2	63.9142	63.7942	63.7647	64.0608	64.5728	65.271	66.1714	67.2272	68.3882	69.4635	70.5166	71.5559	72.5678	73.4805	74.2106	74.6696	74.7649	74.6437	74.3538	73.706	72.8938	71.6802	70.0786	68.0857	65.3885	62.7126	60.0803	58.0269	56.4522	55.7182	55.6401	56.0154	56.9287	57.9212	59.1525	60.6972	62.7805	65.5151	68.8712	72.3846	75.5479	78.473	80.3559	82.0464	83.0711	83.7963	84.1979	84.5882
13	3	62.9709	63.5517	64.2997	65.6496	67.0737	68.2319	69.1396	69.9222	70.6153	71.2741	71.924	72.5264	73.0852	73.5228	73.7274	73.5735	72.9063	71.6286	69.8746	69.5176	69.8286	70.2626	70.6062	70.6814	70.2222	69.54	68.4005	67.4615	66.6882	65.9641	65.2389	64.0561	61.9286	60.0302	59.6106	59.4542	59.7502	60.2297	60.7815	61.6195	62.9453	64.5615	67.2134	69.8176	71.7161	73.216	74.2054	75.0197
13	4	48.0402	48.1179	48.1972	48.282	48.3605	48.4235	48.4795	48.5475	48.6249	48.7192	48.818	49.002	49.2013	49.3559	49.4644	49.5534	49.6144	49.6418	49.6432	49.7	49.7836	49.7763	49.6511	49.3566	48.7364	48.0175	47.096	45.5993	43.627	41.6358	39.7629	37.8782	35.924	34.1911	33.6209	33.3479	33.5858	34.46	35.9467	37.8779	40.0353	42.405	46.0312	49.7385	53.3853	57.0528	60.794	64.521
13	5	86.2275	86.1539	86.0799	86.0047	85.9452	85.9159	85.9027	85.8724	85.8307	85.8035	85.7801	86.017	86.3889	86.9909	87.7725	88.5076	89.1861	89.887	90.6054	90.9044	91.0057	91.0587	91.0782	90.9339	90.4871	90.0668	89.7007	89.4979	89.4303	89.5054	89.6767	89.8217	89.795	89.4734	87.686	84.8937	80.3742	75.0171	69.2156	63.4083	58.0617	53.0162	49.2168	45.7789	43.8891	42.9419	43.2638	44.907
13	6	41.3542	44.9799	48.6004	52.202	55.7936	59.3791	62.4586	64.2649	65.1294	65.0179	64.6547	64.0762	63.4054	62.5933	61.6544	60.6982	59.7057	58.5681	57.3174	55.6026	53.6719	51.6657	49.6781	47.8731	46.3996	44.8507	43.1469	41.5064	39.9183	39.1438	39.1219	39.7623	41.3277	42.9951	44.8969	46.8732	48.9773	51.1964	53.5139	55.8874	58.2668	60.5327	61.641	62.6922	63.9013	64.9137	65.4368	65.6412
13	7	59.6822	60.4162	61.1225	61.7289	62.2193	62.5593	62.7591	62.8923	62.9751	62.9819	62.969	62.6189	62.1637	61.6989	61.2757	60.9848	60.8754	60.9103	61.0576	61.3073	61.6026	61.8836	62.1402	62.3845	62.6141	62.8864	63.246	63.5455	63.7954	63.8592	63.7617	63.5375	63.134	62.6254	61.6313	60.3258	58.4848	56.3389	53.9989	51.9678	50.7517	49.919	49.7972	49.9576	51.4362	53.4091	55.8122	58.5925
14	1	57.8983	58.0555	58.2126	58.3392	58.4511	58.6794	59.075	59.4051	59.1846	58.6338	57.7798	56.6744	55.5632	54.5491	53.6198	52.7583	51.9987	51.2325	50.4372	49.6432	48.8765	48.1223	48.5606	50.7534	53.0023	55.0692	57.0977	58.9045	60.6076	62.4988	64.6411	67.0303	69.7546	72.7973	75.8596	78.9521	81.9348	84.6324	87.1932	89.7898	92.4303	94.9899	96.9454	98.9008	100.484	101.959	103.486	105.078
14	2	64.4477	65.0949	65.742	66.3167	66.8566	67.4708	68.1975	68.9883	69.9101	70.9105	71.9147	72.922	73.8499	74.646	75.3338	75.9507	76.4719	77.1085	78.254	79.4018	80.3259	81.1479	81.8302	82.307	82.6744	82.412	82.017	80.9685	79.6141	78.4803	77.6944	76.9859	76.0232	74.8203	73.6327	72.4684	71.3656	70.4125	69.619	69.2463	69.4681	69.7638	70.6108	71.4579	71.2214	70.6688	69.5547	67.9079
14	3	52.775	52.4878	52.2006	51.8749	51.5308	51.1697	50.789	50.4094	50.0643	49.74	49.5074	49.3507	49.2283	49.1296	49.031	48.8832	48.6656	48.4938	48.5241	48.5853	48.8655	49.2456	49.8345	50.7305	51.6582	52.6928	53.7499	54.7513	55.7267	56.6472	57.5109	58.2669	58.8063	59.1346	59.3397	59.3569	59.2671	58.9536	58.4312	57.4279	55.7793	54.5018	55.9939	57.4859	59.7224	62.176	63.7308	64.3515
14	4	62.4646	62.2303	61.9961	61.8327	61.7033	61.5606	61.3918	61.2256	61.1104	61.0257	60.8584	60.6226	60.4477	60.4021	60.445	60.501	60.5892	60.8032	61.5716	62.3942	63.5006	64.7367	65.8672	66.8424	67.7691	68.4358	69.0477	69.3197	69.4326	69.1854	68.5622	67.5391	65.9326	63.762	61.3538	58.5835	55.7244	52.7322	49.7763	47.3377	45.6435	44.2209	44.8246	45.4283	46.4875	47.6795	49.9695	53.3557
14	5	53.2447	53.4483	53.6519	53.9302	54.2444	54.9976	56.3621	57.8493	59.0014	59.9524	60.6703	61.195	61.6468	62.0609	62.5506	63.3558	64.6479	66.0265	67.787	69.5105	70.6712	71.5749	72.4062	73.1311	74.0459	76.196	78.6061	80.2504	81.536	82.3843	82.8241	83.1119	83.5323	84.0748	84.5391	84.8846	84.952	84.3461	83.3294	81.9585	80.0836	78.1001	75.3057	72.5113	69.1601	65.6466	61.6933	57.3133
14	6	77.9943	79.4202	80.8461	82.2391	83.6163	84.9907	86.3643	87.6555	88.5664	89.2491	89.623	89.7412	89.7929	89.8441	89.8618	89.7748	89.5027	88.9647	87.2543	85.4773	83.5914	81.6557	79.5838	77.3116	74.9748	72.291	69.534	66.6818	63.785	61.1822	58.9373	56.8301	54.6187	52.3025	49.8551	47.2076	44.935	43.6613	43.0192	43.0137	43.9076	44.913	46.7505	48.5879	51.8221	55.4636	59.9543	65.2585
[truncated: 78 more columns]
