# Supplementary material for: Spinal lumbar dI2 interneurons contribute to stability of bipedal stepping
Source: eLife. 2021 Aug 16;10:e62001. doi: 10.7554/eLife.62001 (PMC8448531; doi:10.7554/eLife.62001)
Supplement: Figure 7—figure supplement 2—source data 1. — The landing angles of each chick (Figure 7—figure supplement 2B). [file elife-62001-fig7-figsupp2-data1.xlsx]

## Sheet: Sheet1
Landing angles
Control1	Control2	Control3	Control4	TeTX1	TeTX2	TeTX3	TeTX4	TeTX5
77.8588	74.7346	72.703	74.2842	77.1491	NaN	65.0393	78.4595	61.5402
78.3351	80.9351	70.6068	80.7615	80.3637	NaN	65.6368	75.672	78.3669
79.8759	72.8346	82.5528	72.6652	82.0765	NaN	69.149	71.5924	69.3632
85.311	86.4887	83.6657	65.976	76.2863	NaN	65.9237	82.1444	83.3661
85.5154	77.0926	77.4339	60.7689	80.337	NaN	66.9335	80.3958	64.3891
87.1723	81.9703	70.7844	68.7361	75.5648	80.9139	85.4171	86.4346	65.5321
83.213	74.4304	73.2158	68.4628	87.9142	65.7357	56.4023	76.1405	81.188
78.1545	79.6151	71.3311	74.8494	69.2941	66.1049	71.685	68.0281	84.9466
71.921	85.3728	67.5498	78.8524	77.018	68.5879	69.7264	83.8071	69.8331
69.8807	77.258	67.2877	70.8599	83.2222	77.7294	89.1982	85.9728	75.4871
80.8713	78.1666	73.6308	83.8798	74.6798	56.5368	74.5293	69.3889	80.3805
77.9685	66.4625	78.5319	76.8793	76.5148	77.191	57.1357	70.7572	79.1103
79.4304	76.7065	71.8385	83.7973	79.1601	83.7456	71.9579	76.3319	77.3942
67.9606	69.4693	77.0933	79.3893	81.9818	74.3136	69.1253	73.8954	85.4532
70.696	71.1295	76.811	72.8048	80.1245	70.9937	67.6492	84.8602	78.6271
78.3477	78.0919	75.8315	76.3306	82.7166	70.3702	75.3087	85.4428	88.2075
78.4062	89.4945	67.1239	86.2745	85.281	74.1069	59.1511	64.0516	67.4668
67.982	85.6803	71.6202	79.6569	81.8634	72.2473	61.0104	79.0485	87.7023
71.9886	69.9614	73.7971	77.5725	72.6054	71.52	71.2164	75.6618	71.0618
79.7021		73.611	80.7278	72.6754	76.5443	59.1809	74.9082	71.8136
75.1672		76.1436	76.9756	87.3332	76.4495	64.0196	89.8851	77.6676
88.5908		80.9725	82.3676	69.8906	78.3586	76.3796	70.0033	80.008
68.6999		72.6345	75.261	78.784	70.8025	70.2489	81.5649	80.0887
74.4755		78.8034	67.5574	83.5499	86.0555	69.1366	75.062	80.0565
76.7873		78.4527	75.5326	83.8658	75.0374	67.2986	76.3677	84.9086
72.2005		78.1284	72.4212	72.8454	88.1569	65.0725	79.8251	73.1678
77.2079		68.6615	80.6829	68.0614	88.4401	67.0302	88.8002	74.4195
69.7093		73.5131	65.3003	81.7865	81.6783	64.2048	85.3213	84.5005
75.8729		73.3228	69.6727	77.6129	83.6426	84.3236	73.1763	67.9412
75.6219		76.9241	68.1619	84.2844	76.0598	65.9785	79.3985	73.7964
88.898		73.3951	71.8777	80.2153	73.0779	74.6622	80.5069	87.2486
74.8605		72.0861	70.6102	72.612	71.5829	58.7745	75.4488	69.7901
85.8486		70.8984	80.0982	70.454	65.7421	64.5602	84.1647	80.9942
65.1216		83.1727	69.1071	77.4016	71.6091	65.0807	82.0133	82.2947
83.3826		77.2269	69.1529	77.5812	68.6144	66.856	78.1962	78.4713
77.7705		73.4312	70.5111	82.268	80.5634	74.7206	83.0757	81.71
75.148		73.586	69.1575	66.9854	87.017	70.5203	81.344	74.4915
85.8259		72.3761	73.58	79.79	83.4056	74.7486	76.2889	77.7493
84.3184		74.5778	69.8026	77.4854	84.7131	64.6049	70.1936	83.9011
74.9565		87.7092	74.3479	74.4566	73.1888	81.1878	74.3947	78.0914
67.0056		72.1627	73.1666	77.6273	77.705	74.4667	74.2878	88.8568
80.7961		73.2503	69.6886	83.129	78.3351	70.2351	80.3175	62.9788
69.0346		73.1646	68.1332	69.0606	86.0514	75.3821	73.6094	85.4842
87.8425		70.4213	73.8887	73.2801	81.1138	75.8693	75.4587	69.7168
79.2864		68.1074	76.4817	65.1058	79.389	70.1217	71.529	72.9813
79.3175		74.1207	86.2868	67.1567	71.4787	66.1002	71.0407	81.7225
69.0202		68.9115	74.6853	65.9336	77.6258	63.535	70.489	87.35
		71.7645	70.3992	78.5062	82.9438	75.3215	79.2486	81.1747
		67.7633	69.1247	82.3476	80.0501	69.4683	76.9789	67.0933
		67.4209	73.8172	66.0082	90.8818	61.5729	86.5015	75.9664
		65.3921	86.8944	65.4692	86.2979	65.5852	79.8197	69.7613
		71.5809		71.0918	84.8437	65.3117	76.9269	85.8929
		67.1509		78.8129	86.1944	66.9414	75.0671	79.9327
		66.3408		86.2194	74.7818	73.1453	73.3364	81.0718
		74.9174		64.6966	88.9636	67.4803	72.4699	89.2475
		70.1077		65.4984	74.9057	70.7162	74.4316	85.2567
		71.7359		66.6267	85.9547	71.3086	74.1144	86.2559
		69.1328		62.4222	84.1609	58.7558	71.9613	80.0861
		72.75		66.045	85.7763	67.096	76.7285	71.2563
		68.0694		65.7176	82.0851	69.1096		79.0662
		73.4481		69.0032	83.9995	69.53		78.426
		71.5785		65.6015	78.6791	75.4858		68.3902
		74.3282		57.9148	67.1679	88.6056		71.3996
		67.6403		61.5999		72.575		79.3947
		69.0238		69.024		83.3877		74.973
		66.6361		65.4258		68.2605		74.7205
		73.4272		57.5448		54.353		73.1386
		72.2197		71.961		69.1447		64.4355
		67.7637		77.5857		80.5101		88.1487
		70.0847		70.6523				84.6434
		73.5343		72.7358				73.4681
				NaN				71.6646
				NaN				74.8839
				NaN				80.7867
				NaN				87.708
				66.0117				85.1284
				64.5769				60.4994
				61.4854				67.2271
				76.08				81.0076
				77.1444				72.2882
				74.7105				74.22
				75.0573				78.453
				76.3118				78.8961
				75.775				76.5676
				83.0421				62.8403
				78.2643				74.8652
				71.0964				73.9516
				83.0998				74.889
				87.3182				72.177
				87.6486				79.3164
				84.6041
				59.7632
				80.5981
				91.2682
				85.3427
				81.8914
				44.174
				47.3081
				49.8283
				50.2238
				52.9046
				66.7531
				67.876
				66.0455
				72.9936
				68.2067
				63.2685
				72.8162
				67.1295
				70.3214
				62.1227
				70.6111
				63.8436
