# Supplementary material for: Spinal lumbar dI2 interneurons contribute to stability of bipedal stepping
Source: eLife. 2021 Aug 16;10:e62001. doi: 10.7554/eLife.62001 (PMC8448531; doi:10.7554/eLife.62001)
Supplement: Figure 7—figure supplement 2—source data 2. — The landing angles before and not before a collapse in each chick (Figure 7—figure supplement 2C). [file elife-62001-fig7-figsupp2-data2.xlsx]

## Sheet: Sheet1
Landing angles before and not before a collapse
Not before collapse	Before collapse
77.1491	79.1601
80.3637	72.6054
82.0765	72.6754
76.2863	77.6129
80.337	70.6523
75.5648	84.6041
87.9142	59.7632
77.018	63.2685
83.2222	65.7357
74.6798	77.7294
76.5148	56.5368
81.9818	74.1069
80.1245	70.8025
85.281	86.0555
81.8634	88.4401
87.3332	81.6783
69.8906	83.4056
78.784	81.1138
83.8658	79.389
72.8454	86.2979
68.0614	74.9057
81.7865	85.7763
80.2153	82.0851
72.612	69.149
70.454	65.9237
77.4016	69.7264
77.5812	89.1982
66.9854	74.5293
79.79	61.0104
77.4854	71.2164
77.6273	69.1366
83.129	65.0725
69.0606	67.0302
65.1058	64.2048
67.1567	81.1878
65.9336	74.4667
78.5062	70.2351
66.0082	75.3821
65.4692	83.3877
71.0918	68.2605
78.8129	75.672
64.6966	71.5924
65.4984	80.3958
66.6267	76.1405
62.4222	85.9728
66.045	69.3889
65.7176	76.3319
65.6015	85.4428
57.9148	89.8851
61.5999	70.0033
65.4258	79.8251
57.5448	88.8002
71.961	80.5069
77.5857	75.4488
66.0117	78.1962
64.5769	80.3175
76.08	71.529
77.1444	76.9789
74.7105	74.4316
75.0573	83.3661
75.775	64.3891
83.0421	69.8331
78.2643	75.4871
71.0964	88.2075
87.3182	80.008
87.6486	80.0887
91.2682	87.2486
85.3427	81.71
44.174	74.4915
47.3081	85.4842
49.8283	81.7225
50.2238	85.8929
66.7531	79.3947
67.876	64.4355
66.0455	74.8839
72.9936	80.7867
72.8162	74.8652
67.1295	74.889
70.3214
62.1227
70.6111
80.9139
66.1049
68.5879
83.7456
74.3136
70.9937
70.3702
71.52
76.5443
76.4495
78.3586
88.1569
76.0598
73.0779
71.5829
65.7421
71.6091
68.6144
87.017
84.7131
77.705
78.3351
86.0514
77.6258
82.9438
80.0501
90.8818
86.1944
74.7818
88.9636
84.1609
83.9995
78.6791
65.0393
65.6368
66.9335
56.4023
71.685
57.1357
69.1253
67.6492
75.3087
59.1511
64.0196
76.3796
70.2489
84.3236
65.9785
58.7745
64.5602
65.0807
66.856
74.7206
70.5203
64.6049
70.1217
66.1002
63.535
75.3215
61.5729
65.5852
65.3117
66.9414
73.1453
67.4803
70.7162
58.7558
67.096
69.1096
69.53
75.4858
72.575
54.353
69.1447
78.4595
82.1444
68.0281
83.8071
73.8954
84.8602
64.0516
75.6618
74.9082
75.062
76.3677
73.1763
79.3985
82.0133
83.0757
81.344
70.1936
74.3947
74.2878
73.6094
71.0407
70.489
86.5015
79.8197
76.9269
75.0671
72.4699
74.1144
71.9613
61.5402
78.3669
69.3632
65.5321
81.188
80.3805
79.1103
77.3942
85.4532
67.4668
87.7023
71.0618
71.8136
80.0565
84.9086
73.1678
74.4195
67.9412
73.7964
69.7901
80.9942
78.4713
77.7493
83.9011
78.0914
62.9788
72.9813
87.35
81.1747
67.0933
75.9664
79.9327
81.0718
89.2475
85.2567
86.2559
71.2563
79.0662
78.426
68.3902
71.3996
74.973
73.1386
88.1487
84.6434
71.6646
87.708
85.1284
67.2271
81.0076
72.2882
74.22
78.453
78.8961
62.8403
73.9516
72.177
