# Supplementary material for: Spinal lumbar dI2 interneurons contribute to stability of bipedal stepping
Source: eLife. 2021 Aug 16;10:e62001. doi: 10.7554/eLife.62001 (PMC8448531; doi:10.7554/eLife.62001)
Supplement: Figure 7—source data 1. — The number of collapses of each chick (Figure 7A). [file elife-62001-fig7-data1.xlsx]

## Sheet: Sheet1
	Control1	Control2	Control3	Control4	dI2:TeTX1	dI2:TeTX3	dI2:TeTX2	dI2:TeTX4	dI2:TeTX5
Collapses proprtion	2.12	0	0	0	4.4	18.8	20.6	24.5	29
(Calculated as # collapses / #strides)
	control	TeTX
	0	4.4
	0	18.8
	2.12	20.6
	0	24.5
		29
	control	TeTX
Avg	0.53	19.46
Std	0.917987	8.30605
